# Supplementary material for: A comprehensive analysis and performance evaluation for osteoporosis prediction models
Source: PeerJ Comput Sci. 2024 Dec 4;10:e2338. doi: 10.7717/peerj-cs.2338 (PMC11784534; doi:10.7717/peerj-cs.2338)
Supplement: Supplemental Information 1 — BMD and BMC values for different vertebral sites, such as L1 (DXXL1BMD, DXXL1BMC) and L2 (DXXL2BMD, DXXL2BMC), along with questionnaire responses related to osteoporosis (e.g., OSQ150, OSQ160A, etc.). The dataset also provides an osteoporosis classification (Osteo_Class) for each patient, offering a comprehensive overview of spinal bone health in relation to the questionnaire findings. [file peerj-cs-10-2338-s001.xlsx]

## Sheet: Sheet1
	SEQN	DXXOSBMD	DXXOSBMC	DXXOSA	DXXL1BMD	DXXL1BMC	DXXL1A	DXXL2BMD	DXXL2BMC	DXXL2A	DXXL3BMD	DXXL3BMC	DXXL3A	DXXL4BMD	DXXL4BMC	DXXL4A	DXASPNK	DXASPND0	OSQ010A	OSQ010B	OSQ010C	OSQ020A	OSQ020B	OSQ020C	OSD030AA	OSQ040AA	OSD050AA	OSD030AB	OSQ040AB	OSD050AB	OSD030AC	OSQ040AC	OSD050AC	OSD030BA	OSQ040BA	OSD050BA	OSD030BB	OSQ040BB	OSD050BB	OSD030BC	OSQ040BC	OSD050BC	OSD030BD	OSQ040BD	OSD050BD	OSD030BE	OSQ040BE	OSD050BE	OSD030BF
0	109274	1.062	89.77	84.55	1.031	19.29	18.71	1.137	22.04	19.38	1.123	27.32	24.33	0.954	21.12	22.13	1.1388	39.2809	2	2	2	0	0	0	0	0	0	0	0	0	0	0	0	0	0	0	0	0	0	0	0	0	0	0	0	0	0	0	0
1	109290	0.883	49.37	55.9	0.934	11.73	12.56	0.91	12.88	14.15	0.855	12.5	14.63	0.842	12.26	14.57	1.1253	47.8842	2	2	2	0	0	0	0	0	0	0	0	0	0	0	0	0	0	0	0	0	0	0	0	0	0	0	0	0	0	0	0
2	109292	1.121	76.9	68.6	1.034	16.09	15.56	1.151	19.34	16.8	1.139	21.19	18.6	1.15	20.28	17.64	1.1268	44.9388	2	2	2	0	0	0	0	0	0	0	0	0	0	0	0	0	0	0	0	0	0	0	0	0	0	0	0	0	0	0	0
3	109300	0.72	34.87	48.46	0.697	6.95	9.97	0.74	8.41	11.36	0.75	9.8	13.07	0.691	9.71	14.06	1.1545	43.0971	2	2	2	0	0	0	0	0	0	0	0	0	0	0	0	0	0	0	0	0	0	0	0	0	0	0	0	0	0	0	0
4	109305	0.769	49.09	63.86	0.718	9.93	13.83	0.811	11.85	14.61	0.779	12.81	16.44	0.764	14.51	18.98	1.139	47.7905	2	2	2	0	0	0	0	0	0	0	0	0	0	0	0	0	0	0	0	0	0	0	0	0	0	0	0	0	0	0	0
5	109316	0.786	38.42	48.88	0.698	7.34	10.52	0.821	9.74	11.86	0.825	10.56	12.8	0.787	10.79	13.7	1.1392	45.3884	2	2	2	0	0	0	0	0	0	0	0	0	0	0	0	0	0	0	0	0	0	0	0	0	0	0	0	0	0	0	0
6	109327	0.946	49.41	52.22	0.852	10.39	12.2	0.953	11.45	12.02	0.96	13.37	13.93	1.009	14.2	14.07	1.1495	42.2168	2	2	2	0	0	0	0	0	0	0	0	0	0	0	0	0	0	0	0	0	0	0	0	0	0	0	0	0	0	0	0
7	109330	0.912	60.79	66.68	0.871	12.55	14.41	0.893	13.63	15.27	1.002	17.39	17.36	0.876	17.21	19.64	1.1368	46.3373	2	2	2	0	0	0	0	0	0	0	0	0	0	0	0	0	0	0	0	0	0	0	0	0	0	0	0	0	0	0	0
8	109348	0.803	46.55	57.99	0.748	9.81	13.12	0.838	13.12	15.65	0.812	11.57	14.26	0.806	12.05	14.95	1.139	49.316	2	2	2	0	0	0	0	0	0	0	0	0	0	0	0	0	0	0	0	0	0	0	0	0	0	0	0	0	0	0	0
9	109350	1.174	91.2	77.67	1.141	19.68	17.26	1.204	20.97	17.42	1.188	24.01	20.22	1.165	26.54	22.77	1.1408	36.7382	2	2	2	0	0	0	0	0	0	0	0	0	0	0	0	0	0	0	0	0	0	0	0	0	0	0	0	0	0	0	0
10	109351	0.962	57.9	60.17	0.98	13.45	13.73	0.972	14.51	14.92	0.925	13.98	15.11	0.973	15.97	16.41	1.1319	46.2796	2	2	2	0	0	0	0	0	0	0	0	0	0	0	0	0	0	0	0	0	0	0	0	0	0	0	0	0	0	0	0
11	109371	1.148	79.16	68.97	1.179	17.02	14.44	1.153	18.87	16.37	1.152	19.55	16.96	1.119	23.72	21.21	1.1544	39.9974	2	2	2	0	0	0	0	0	0	0	0	0	0	0	0	0	0	0	0	0	0	0	0	0	0	0	0	0	0	0	0
12	109389	1.106	69.96	63.28	0.946	14.12	14.92	1.049	16	15.25	1.164	20.4	17.53	1.248	19.44	15.58	1.1285	42.9193	2	1	2	0	1	0	0	0	0	0	0	0	0	0	0	17	1	0	0	0	0	0	0	0	0	0	0	0	0	0	0
13	109392	0.836	47.52	56.87	0.832	10.54	12.67	0.763	10.82	14.19	0.875	13.32	15.23	0.868	12.84	14.79	1.131	49.4838	2	2	2	0	0	0	0	0	0	0	0	0	0	0	0	0	0	0	0	0	0	0	0	0	0	0	0	0	0	0	0
14	109395	1.054	55.6	52.75	0.984	11.95	12.14	1.098	13.59	12.37	1.098	15.22	13.86	1.032	14.84	14.37	1.1528	42.4763	2	2	2	0	0	0	0	0	0	0	0	0	0	0	0	0	0	0	0	0	0	0	0	0	0	0	0	0	0	0	0
15	109408	1.11	69.13	62.26	1.094	14.91	13.64	1.145	17.22	15.04	1.055	16.86	15.98	1.144	20.14	17.6	1.1496	35.8694	2	2	2	0	0	0	0	0	0	0	0	0	0	0	0	0	0	0	0	0	0	0	0	0	0	0	0	0	0	0	0
16	109411	0.878	43.65	49.73	0.807	8.15	10.1	0.898	10.53	11.73	0.906	12.05	13.3	0.886	12.93	14.6	1.1552	45.6034	2	2	2	0	0	0	0	0	0	0	0	0	0	0	0	0	0	0	0	0	0	0	0	0	0	0	0	0	0	0	0
17	109414	0.721	11.84	16.43	0.716	6.58	9.2	0.728	5.26	7.23	0.932	10.84	11.63	0.946	13.32	14.08	1.1394	44.4278	2	2	2	0	0	0	0	0	0	0	0	0	0	0	0	0	0	0	0	0	0	0	0	0	0	0	0	0	0	0	0
18	109415	1.261	81.34	64.48	1.163	15.81	13.59	1.262	17.54	13.9	1.251	19.87	15.88	1.332	28.11	21.11	1.1119	41.2389	2	2	2	0	0	0	0	0	0	0	0	0	0	0	0	0	0	0	0	0	0	0	0	0	0	0	0	0	0	0	0
19	109416	0.801	53.78	67.11	0.727	11.05	15.2	0.809	13.13	16.22	0.793	13.36	16.86	0.863	16.24	18.83	1.1478	41.4668	2	2	2	0	0	0	0	0	0	0	0	0	0	0	0	0	0	0	0	0	0	0	0	0	0	0	0	0	0	0	0
20	109436	0.862	59.97	69.59	0.735	12.03	16.38	0.835	14.63	17.52	0.922	16.82	18.24	0.945	16.49	17.45	1.1355	46.1942	2	2	2	0	0	0	0	0	0	0	0	0	0	0	0	0	0	0	0	0	0	0	0	0	0	0	0	0	0	0	0
21	109439	1.132	68.99	60.94	1.073	14.48	13.49	1.047	15.46	14.77	1.211	19.61	16.2	1.18	19.45	16.48	1.1375	44.4588	2	2	2	0	0	0	0	0	0	0	0	0	0	0	0	0	0	0	0	0	0	0	0	0	0	0	0	0	0	0	0
22	109468	1.126	72.84	64.69	1.014	14.75	14.55	1.06	16.2	15.28	1.165	18.98	16.3	1.234	22.92	18.57	1.127	41.2896	2	2	2	0	0	0	0	0	0	0	0	0	0	0	0	0	0	0	0	0	0	0	0	0	0	0	0	0	0	0	0
23	109474	0.931	54.13	58.15	0.835	11.54	13.83	0.961	13.54	14.09	0.975	14.45	14.81	0.947	14.6	15.42	1.1321	45.6556	2	2	2	0	0	0	0	0	0	0	0	0	0	0	0	0	0	0	0	0	0	0	0	0	0	0	0	0	0	0	0
24	109481	0.938	52.34	55.79	0.863	10.81	12.52	0.961	13.71	14.26	0.912	12.38	13.58	1.001	15.44	15.43	1.1536	42.2935	2	2	2	0	0	0	0	0	0	0	0	0	0	0	0	0	0	0	0	0	0	0	0	0	0	0	0	0	0	0	0
25	109483	1.387	84.74	61.08	1.298	18.56	14.3	1.441	20.08	13.93	1.426	19.8	13.88	1.386	26.3	18.97	1.1322	44.6706	2	2	2	0	0	0	0	0	0	0	0	0	0	0	0	0	0	0	0	0	0	0	0	0	0	0	0	0	0	0	0
26	109486	1.144	91.7	80.12	1.057	19.56	18.51	1.16	21.44	18.49	1.241	24.71	19.91	1.119	25.97	23.21	1.1502	43.0804	2	2	2	0	0	0	0	0	0	0	0	0	0	0	0	0	0	0	0	0	0	0	0	0	0	0	0	0	0	0	0
27	109495	1.198	80.79	67.42	1.108	17.18	15.5	1.119	17.37	15.52	1.226	21.74	17.74	1.313	24.5	18.66	1.1282	40.1286	2	2	2	0	0	0	0	0	0	0	0	0	0	0	0	0	0	0	0	0	0	0	0	0	0	0	0	0	0	0	0
28	109496	0.881	54.66	62.06	0.868	12.43	14.33	0.857	12.18	14.23	0.936	14.26	15.24	0.864	15.78	18.26	1.1408	37.1105	2	1	2	0	1	0	0	0	0	0	0	0	0	0	0	11	1	0	0	0	0	0	0	0	0	0	0	0	0	0	0
29	109503	1.106	82.82	74.88	1.097	20.2	18.41	1.109	20.61	18.58	1.107	22.04	19.92	1.112	19.98	17.97	1.13	45.2798	2	2	2	0	0	0	0	0	0	0	0	0	0	0	0	0	0	0	0	0	0	0	0	0	0	0	0	0	0	0	0
30	109504	1.056	76.37	72.34	0.965	15.32	15.88	0.941	14.93	15.87	0.986	18.89	19.15	1.27	27.24	21.44	1.1308	43.6676	2	1	2	0	1	0	0	0	0	0	0	0	0	0	0	15	1	0	0	0	0	0	0	0	0	0	0	0	0	0	0
31	109519	1.254	75.96	60.55	1.2	15.66	13.05	1.315	20.13	15.31	1.247	19.46	15.61	1.249	20.7	16.58	1.1185	43.6039	2	2	2	0	0	0	0	0	0	0	0	0	0	0	0	0	0	0	0	0	0	0	0	0	0	0	0	0	0	0	0
32	109523	0.998	71.68	71.85	1.033	17.75	17.19	1.023	18.18	17.77	0.993	16.22	16.34	0.95	19.53	20.56	1.1565	43.169	2	2	2	0	0	0	0	0	0	0	0	0	0	0	0	0	0	0	0	0	0	0	0	0	0	0	0	0	0	0	0
33	109527	0.733	23.99	32.72	0.74	7.89	10.67	0.826	9.89	11.98	0.724	7.46	10.3	0.735	8.64	11.74	1.1345	45.483	2	2	2	0	0	0	0	0	0	0	0	0	0	0	0	0	0	0	0	0	0	0	0	0	0	0	0	0	0	0	0
34	109544	1.038	55.46	53.45	0.955	11.16	11.69	0.987	13.23	13.4	1.076	13.74	12.76	1.111	17.33	15.6	1.126	41.4787	2	2	2	0	0	0	0	0	0	0	0	0	0	0	0	0	0	0	0	0	0	0	0	0	0	0	0	0	0	0	0
35	109552	1.003	73.38	73.18	0.973	16.21	16.66	1.016	18.55	18.27	0.956	17.45	18.25	1.059	21.17	20	1.1323	41.5534	2	2	2	0	0	0	0	0	0	0	0	0	0	0	0	0	0	0	0	0	0	0	0	0	0	0	0	0	0	0	0
36	109558	1.188	74.95	63.1	1.189	21.84	18.38	1.342	26.25	19.56	1.224	28.84	23.57	1.147	24.27	21.15	1.1361	45.7966	2	2	2	0	0	0	0	0	0	0	0	0	0	0	0	0	0	0	0	0	0	0	0	0	0	0	0	0	0	0	0
37	109574	0.908	49.04	54	0.794	9.09	11.45	0.854	11.51	13.48	1.01	14.89	14.75	0.946	13.55	14.32	1.1317	46.4813	2	2	2	0	0	0	0	0	0	0	0	0	0	0	0	0	0	0	0	0	0	0	0	0	0	0	0	0	0	0	0
38	109577	1.054	52.76	50.07	0.959	11.24	11.72	0.981	10.12	10.31	1.102	14.58	13.23	1.136	16.82	14.8	1.1478	38.8802	2	2	2	0	0	0	0	0	0	0	0	0	0	0	0	0	0	0	0	0	0	0	0	0	0	0	0	0	0	0	0
39	109587	1.079	54.34	50.35	1.065	12.6	11.83	1.074	13.07	12.18	1.11	15.64	14.09	1.063	13.03	12.26	1.1363	44.8237	2	2	2	0	0	0	0	0	0	0	0	0	0	0	0	0	0	0	0	0	0	0	0	0	0	0	0	0	0	0	0
40	109588	1.186	114.49	96.5	1.072	25.23	23.54	1.204	28.02	23.28	1.307	29.01	22.2	1.172	32.23	27.49	1.1379	47.6208	2	2	2	0	0	0	0	0	0	0	0	0	0	0	0	0	0	0	0	0	0	0	0	0	0	0	0	0	0	0	0
41	109591	0.917	45.45	49.58	0.895	10.76	12.03	0.916	9.96	10.88	0.894	11.34	12.68	0.957	13.39	13.99	1.1306	41.1179	2	2	2	0	0	0	0	0	0	0	0	0	0	0	0	0	0	0	0	0	0	0	0	0	0	0	0	0	0	0	0
42	109593	1.065	71.49	67.1	0.916	13.76	15.02	1.024	16.36	15.97	1.119	19.68	17.58	1.171	21.69	18.52	1.1363	44.4056	2	2	2	0	0	0	0	0	0	0	0	0	0	0	0	0	0	0	0	0	0	0	0	0	0	0	0	0	0	0	0
43	109594	1.4	128.28	91.61	1.41	30.55	21.67	1.379	29.95	21.73	1.429	32.6	22.81	1.385	35.18	25.41	1.1324	43.9281	2	2	2	0	0	0	0	0	0	0	0	0	0	0	0	0	0	0	0	0	0	0	0	0	0	0	0	0	0	0	0
44	109597	1.012	49.35	48.74	0.998	11.12	11.14	0.98	10.05	10.26	1.062	13.53	12.74	1.003	14.65	14.61	1.1332	48.7628	2	2	2	0	0	0	0	0	0	0	0	0	0	0	0	0	0	0	0	0	0	0	0	0	0	0	0	0	0	0	0
45	109607	1.08	68.37	63.33	0.994	14.64	14.72	1.096	17.09	15.59	1.132	17.97	15.87	1.089	18.67	17.14	1.1481	41.2446	2	2	2	0	0	0	0	0	0	0	0	0	0	0	0	0	0	0	0	0	0	0	0	0	0	0	0	0	0	0	0
46	109608	0.832	43.96	52.86	0.746	8.67	11.63	0.829	9.98	12.03	0.875	12.51	14.3	0.859	12.81	14.9	1.1467	45.7766	2	2	2	0	0	0	0	0	0	0	0	0	0	0	0	0	0	0	0	0	0	0	0	0	0	0	0	0	0	0	0
47	109615	1.064	65.99	62.02	0.913	12.23	13.39	1.059	17.11	16.16	1.146	17.89	15.61	1.113	18.77	16.85	1.1349	43.6555	2	2	2	0	0	0	0	0	0	0	0	0	0	0	0	0	0	0	0	0	0	0	0	0	0	0	0	0	0	0	0
48	109617	0.81	50.87	62.83	0.743	11.57	15.56	0.788	11.27	14.3	0.824	13.18	16	0.875	14.85	16.98	1.139	44.757	2	2	2	0	0	0	0	0	0	0	0	0	0	0	0	0	0	0	0	0	0	0	0	0	0	0	0	0	0	0	0
49	109620	1.098	62.12	56.59	1.109	13.15	11.87	1.1	15.74	14.31	1.084	15.27	14.08	1.1	17.96	16.34	1.1434	37.4267	2	2	2	0	0	0	0	0	0	0	0	0	0	0	0	0	0	0	0	0	0	0	0	0	0	0	0	0	0	0	0
50	109630	0.992	58.25	58.72	1.017	13.18	12.95	1.012	14.5	14.33	0.962	14.8	15.38	0.982	15.78	16.06	1.1416	39.7181	2	2	2	0	0	0	0	0	0	0	0	0	0	0	0	0	0	0	0	0	0	0	0	0	0	0	0	0	0	0	0
51	109634	0.741	36.27	48.94	0.658	7.34	11.16	0.666	7.11	10.67	0.811	10.86	13.38	0.799	10.97	13.72	1.1469	42.4593	2	2	2	0	0	0	0	0	0	0	0	0	0	0	0	0	0	0	0	0	0	0	0	0	0	0	0	0	0	0	0
52	109643	0.961	58.99	61.41	0.888	12.9	14.53	0.934	12.21	13.08	0.983	15.14	15.39	1.018	18.73	18.4	1.1411	42.7122	2	2	1	0	0	1	0	0	0	0	0	0	0	0	0	0	0	0	0	0	0	0	0	0	0	0	0	0	0	0	0
53	109645	0.815	39.94	49.02	0.757	8.79	11.61	0.767	8	10.43	0.895	11.87	13.26	0.822	11.29	13.72	1.1358	45.0595	2	2	2	0	0	0	0	0	0	0	0	0	0	0	0	0	0	0	0	0	0	0	0	0	0	0	0	0	0	0	0
54	109652	0.938	58.54	62.39	0.857	11.05	12.9	0.823	11.83	14.37	0.983	14.54	14.79	1.039	21.12	20.33	1.1271	48.4022	2	2	2	0	0	0	0	0	0	0	0	0	0	0	0	0	0	0	0	0	0	0	0	0	0	0	0	0	0	0	0
55	109656	1.01	58.56	57.99	0.997	13.84	13.89	1.043	14.34	13.75	0.963	13.54	14.06	1.034	16.84	16.3	1.1553	39.6268	2	1	2	0	1	0	0	0	0	0	0	0	0	0	0	8	1	0	0	0	0	0	0	0	0	0	0	0	0	0	0
56	109667	1.094	78.55	71.8	1.042	15.96	15.32	1.054	19.94	18.92	1.101	19.43	17.65	1.165	23.21	19.92	1.134	46.0721	2	2	2	0	0	0	0	0	0	0	0	0	0	0	0	0	0	0	0	0	0	0	0	0	0	0	0	0	0	0	0
57	109675	0.98	54.83	55.95	0.916	10.99	12	1.003	13.31	13.26	1.011	15.3	15.13	0.979	15.23	15.56	1.1568	45.0104	2	2	2	0	0	0	0	0	0	0	0	0	0	0	0	0	0	0	0	0	0	0	0	0	0	0	0	0	0	0	0
58	109676	0.773	39.76	51.41	0.706	9.22	13.05	0.755	9.64	12.76	0.771	8.01	10.39	0.848	12.89	15.2	1.1341	46.2952	2	2	2	0	0	0	0	0	0	0	0	0	0	0	0	0	0	0	0	0	0	0	0	0	0	0	0	0	0	0	0
59	109677	0.995	53.82	54.08	0.888	11.82	13.3	0.923	12.87	13.94	1.061	15.57	14.67	1.114	13.56	12.17	1.1446	41.0874	2	1	2	0	1	0	0	0	0	0	0	0	0	0	0	60	2	1	0	0	0	0	0	0	0	0	0	0	0	0	0
60	109686	1.1	70.6	64.17	0.967	14.74	15.23	1.067	15.71	14.72	1.173	19.31	16.46	1.174	20.84	17.76	1.1522	41.6091	2	2	2	0	0	0	0	0	0	0	0	0	0	0	0	0	0	0	0	0	0	0	0	0	0	0	0	0	0	0	0
61	109709	0.973	63.36	65.1	0.998	13.35	13.37	1.025	14.43	14.08	0.957	15.83	16.55	0.936	19.75	21.1	1.1432	38.3905	2	1	1	0	2	1	0	0	0	0	0	0	0	0	0	9	1	0	10	1	0	0	0	0	0	0	0	0	0	0	0
62	109713	0.941	53.53	56.89	0.783	8.64	11.04	0.925	13.8	14.91	1.023	15.53	15.18	0.988	15.57	15.77	1.1219	48.3188	2	2	2	0	0	0	0	0	0	0	0	0	0	0	0	0	0	0	0	0	0	0	0	0	0	0	0	0	0	0	0
63	109725	0.764	41.56	54.41	0.74	8.87	11.99	0.776	11.14	14.35	0.757	10.01	13.22	0.777	11.54	14.85	1.1343	43.2428	2	2	2	0	0	0	0	0	0	0	0	0	0	0	0	0	0	0	0	0	0	0	0	0	0	0	0	0	0	0	0
64	109742	0.903	50.58	56.01	0.847	10.95	12.92	0.916	12.74	13.9	0.964	12.68	13.15	0.887	14.22	16.03	1.1333	41.7587	2	2	2	0	0	0	0	0	0	0	0	0	0	0	0	0	0	0	0	0	0	0	0	0	0	0	0	0	0	0	0
65	109743	1.078	68.62	63.64	1.037	15.53	14.98	1.08	16.4	15.18	1.097	17.71	16.14	1.096	18.98	17.33	1.1524	38.8079	2	2	2	0	0	0	0	0	0	0	0	0	0	0	0	0	0	0	0	0	0	0	0	0	0	0	0	0	0	0	0
66	109771	0.946	63.09	66.68	0.834	10.64	12.76	0.918	14.1	15.35	1.005	18.41	18.33	0.986	19.94	20.23	1.1356	45.3078	2	2	2	0	0	0	0	0	0	0	0	0	0	0	0	0	0	0	0	0	0	0	0	0	0	0	0	0	0	0	0
67	109774	1.003	44.43	44.3	1.058	14.19	13.41	1.042	10.79	10.35	0.977	10.05	10.29	0.917	9.39	10.25	1.1357	48.3793	2	2	2	0	0	0	0	0	0	0	0	0	0	0	0	0	0	0	0	0	0	0	0	0	0	0	0	0	0	0	0
68	109776	0.699	32.01	45.82	0.638	6.31	9.9	0.682	6.63	9.72	0.693	9.23	13.33	0.764	9.84	12.88	1.1326	45.2861	2	2	2	0	0	0	0	0	0	0	0	0	0	0	0	0	0	0	0	0	0	0	0	0	0	0	0	0	0	0	0
69	109793	1.055	64.19	60.83	0.994	14.84	14.93	1.093	15.01	13.73	1.048	16.77	16	1.086	17.56	16.17	1.1322	47.7815	2	2	2	0	0	0	0	0	0	0	0	0	0	0	0	0	0	0	0	0	0	0	0	0	0	0	0	0	0	0	0
70	109794	1.17	85.99	73.48	1.082	17.5	16.18	1.16	21.3	18.36	1.264	24.42	19.32	1.16	22.76	19.62	1.1399	37.7884	2	1	2	0	1	0	0	0	0	0	0	0	0	0	0	16	1	0	0	0	0	0	0	0	0	0	0	0	0	0	0
71	109811	0.775	53.66	69.22	0.733	11.46	15.65	0.772	12.55	16.26	0.82	13.68	16.68	0.774	15.97	20.63	1.1507	43.194	2	2	2	0	0	0	0	0	0	0	0	0	0	0	0	0	0	0	0	0	0	0	0	0	0	0	0	0	0	0	0
72	109812	0.762	33.55	44.03	0.732	6.85	9.36	0.751	8.11	10.8	0.785	9.01	11.48	0.773	9.58	12.39	1.1292	48.6941	2	2	2	0	0	0	0	0	0	0	0	0	0	0	0	0	0	0	0	0	0	0	0	0	0	0	0	0	0	0	0
73	109816	0.931	50.23	53.95	0.832	9.48	11.39	0.968	11.82	12.21	1.002	13.85	13.82	0.913	15.07	16.52	1.1362	47.2686	2	2	2	0	0	0	0	0	0	0	0	0	0	0	0	0	0	0	0	0	0	0	0	0	0	0	0	0	0	0	0
74	109831	0.877	60.02	68.48	0.823	11.56	14.04	0.859	12.68	14.77	0.848	15.79	18.62	0.95	20	21.05	1.1503	42.3847	2	2	2	0	0	0	0	0	0	0	0	0	0	0	0	0	0	0	0	0	0	0	0	0	0	0	0	0	0	0	0
75	109841	1.255	78.3	62.41	1.222	17.11	14	1.215	20.02	16.48	1.277	20.03	15.68	1.302	21.15	16.24	1.1327	43.969	2	2	2	0	0	0	0	0	0	0	0	0	0	0	0	0	0	0	0	0	0	0	0	0	0	0	0	0	0	0	0
76	109850	1.113	56.92	51.13	1.047	10.83	10.35	1.109	14.47	13.05	1.152	15.05	13.07	1.13	16.56	14.66	1.1518	43.3915	2	2	2	0	0	0	0	0	0	0	0	0	0	0	0	0	0	0	0	0	0	0	0	0	0	0	0	0	0	0	0
77	109854	0.859	62.52	72.75	0.839	13.51	16.1	0.897	15.54	17.32	0.866	16.63	19.2	0.836	16.84	20.13	1.1378	46.5089	2	2	2	0	0	0	0	0	0	0	0	0	0	0	0	0	0	0	0	0	0	0	0	0	0	0	0	0	0	0	0
78	109864	0.874	55.32	63.3	0.873	13.42	15.37	0.859	12.96	15.08	0.836	12.27	14.68	0.917	16.67	18.18	1.138	47.93	2	2	2	0	0	0	0	0	0	0	0	0	0	0	0	0	0	0	0	0	0	0	0	0	0	0	0	0	0	0	0
79	109867	0.878	54.78	62.38	0.842	10.67	12.68	0.868	12.96	14.93	0.894	15.18	16.98	0.898	15.96	17.78	1.1295	44.1356	2	2	2	0	0	0	0	0	0	0	0	0	0	0	0	0	0	0	0	0	0	0	0	0	0	0	0	0	0	0	0
80	109869	1.268	88.35	69.68	1.261	21.06	16.71	1.263	21.21	16.8	1.296	24.3	18.74	1.25	21.78	17.42	1.1257	45.4874	2	2	2	0	0	0	0	0	0	0	0	0	0	0	0	0	0	0	0	0	0	0	0	0	0	0	0	0	0	0	0
81	109874	0.83	58.14	70.04	0.807	12.6	15.61	0.873	15.3	17.54	0.775	15.52	20.03	0.872	14.71	16.87	1.152	41.1849	2	1	2	0	1	0	0	0	0	0	0	0	0	0	0	24	1	0	0	0	0	0	0	0	0	0	0	0	0	0	0
82	109886	1.338	83.91	62.71	1.246	19.45	15.62	1.393	19.94	14.32	1.397	21.94	15.71	1.323	22.57	17.06	1.1424	37.2954	2	1	2	0	2	0	0	0	0	0	0	0	0	0	0	25	1	0	39	1	0	0	0	0	0	0	0	0	0	0	0
83	109901	1.229	54.19	44.11	1.276	26.53	20.79	1.24	21.03	16.96	1.224	27.9	22.79	1.233	26.29	21.32	1.15	39.7862	2	2	1	0	0	2	0	0	0	0	0	0	0	0	0	0	0	0	0	0	0	0	0	0	0	0	0	0	0	0	0
84	109902	1.13	54.19	47.97	1.049	10.25	9.78	1.134	12.57	11.09	1.161	14.44	12.44	1.154	16.92	14.66	1.1359	43.3644	2	2	2	0	0	0	0	0	0	0	0	0	0	0	0	0	0	0	0	0	0	0	0	0	0	0	0	0	0	0	0
85	109908	0.87	64.62	74.28	0.804	13.38	16.65	0.841	14.16	16.83	0.863	16	18.55	0.947	21.08	22.25	1.1483	43.3017	2	2	1	0	0	1	0	0	0	0	0	0	0	0	0	0	0	0	0	0	0	0	0	0	0	0	0	0	0	0	0
86	109913	1.098	54.79	49.92	0.922	9.2	9.98	1.053	11.18	10.62	1.164	15.12	12.99	1.181	19.29	16.33	1.1227	43.0065	2	2	2	0	0	0	0	0	0	0	0	0	0	0	0	0	0	0	0	0	0	0	0	0	0	0	0	0	0	0	0
87	109915	1.097	82.1	74.86	0.968	15.27	15.77	1.09	19.8	18.16	1.142	21.53	18.86	1.156	25.5	22.07	1.1487	41.3983	2	2	2	0	0	0	0	0	0	0	0	0	0	0	0	0	0	0	0	0	0	0	0	0	0	0	0	0	0	0	0
88	109917	0.844	51.22	60.68	0.782	10.27	13.14	0.863	12.64	14.66	0.887	13.66	15.41	0.838	14.64	17.47	1.1353	48.1128	2	2	2	0	0	0	0	0	0	0	0	0	0	0	0	0	0	0	0	0	0	0	0	0	0	0	0	0	0	0	0
89	109921	0.905	45.28	50.04	0.822	9.09	11.06	0.893	10.28	11.51	0.95	11.91	12.54	0.937	14.01	14.94	1.1356	49.5598	2	2	2	0	0	0	0	0	0	0	0	0	0	0	0	0	0	0	0	0	0	0	0	0	0	0	0	0	0	0	0
90	109930	1.031	65.52	63.53	1.002	13.48	13.45	1.01	15.49	15.34	1.117	18.81	16.83	0.991	17.74	17.9	1.1305	39.4571	2	2	1	0	0	1	0	0	0	0	0	0	0	0	0	0	0	0	0	0	0	0	0	0	0	0	0	0	0	0	0
91	109940	0.89	46.33	52.04	0.788	9.16	11.62	0.899	11.12	12.36	0.941	12.19	12.96	0.918	13.86	15.1	1.1556	44.8716	2	2	2	0	0	0	0	0	0	0	0	0	0	0	0	0	0	0	0	0	0	0	0	0	0	0	0	0	0	0	0
92	109959	1.206	76.62	63.55	1.093	15.82	14.47	1.174	18.1	15.42	1.24	19.01	15.34	1.293	23.69	18.33	1.1351	37.0449	2	2	2	0	0	0	0	0	0	0	0	0	0	0	0	0	0	0	0	0	0	0	0	0	0	0	0	0	0	0	0
93	109971	0.868	39.72	45.75	0.768	8.1	10.54	0.826	9.04	10.95	0.945	10.88	11.51	0.919	11.71	12.75	1.1513	43.978	2	2	2	0	0	0	0	0	0	0	0	0	0	0	0	0	0	0	0	0	0	0	0	0	0	0	0	0	0	0	0
94	109977	1.023	53.84	52.62	0.955	10.21	10.69	1.013	12.72	12.55	1.006	14.14	14.06	1.095	16.77	15.32	1.1406	47.8125	2	2	2	0	0	0	0	0	0	0	0	0	0	0	0	0	0	0	0	0	0	0	0	0	0	0	0	0	0	0	0
95	109981	1.12	54.76	48.91	0.98	10.28	10.48	1.061	11.83	11.15	1.176	14.89	12.66	1.215	17.76	14.62	1.161	43.6363	2	2	2	0	0	0	0	0	0	0	0	0	0	0	0	0	0	0	0	0	0	0	0	0	0	0	0	0	0	0	0
96	109987	0.969	60.2	62.11	0.899	12.23	13.61	0.935	12.86	13.76	0.975	15.2	15.59	1.04	19.92	19.16	1.1563	43.8359	2	2	2	0	0	0	0	0	0	0	0	0	0	0	0	0	0	0	0	0	0	0	0	0	0	0	0	0	0	0	0
97	109990	0.791	52.25	66.1	0.713	10.28	14.43	0.715	10.49	14.67	0.836	14.23	17.04	0.864	17.25	19.97	1.1334	43.7478	2	2	2	0	0	0	0	0	0	0	0	0	0	0	0	0	0	0	0	0	0	0	0	0	0	0	0	0	0	0	0
98	109991	1.01	71.57	70.85	0.923	14.01	15.18	0.989	16.29	16.47	1.053	21.93	20.82	1.053	19.34	18.38	1.1458	39.4191	2	1	2	0	1	0	0	0	0	0	0	0	0	0	0	8	1	0	0	0	0	0	0	0	0	0	0	0	0	0	0
99	110006	0.782	39.58	50.62	0.715	8.3	11.61	0.769	11.1	14.44	0.812	7.86	9.67	0.827	12.32	14.9	1.1536	43.4627	2	2	2	0	0	0	0	0	0	0	0	0	0	0	0	0	0	0	0	0	0	0	0	0	0	0	0	0	0	0	0
100	110012	1.261	75.02	59.5	1.154	15.04	13.04	1.292	19.78	15.32	1.322	20.07	15.18	1.261	20.13	15.96	1.1438	39.4451	2	2	2	0	0	0	0	0	0	0	0	0	0	0	0	0	0	0	0	0	0	0	0	0	0	0	0	0	0	0	0
101	110023	0.974	62.91	64.6	0.876	12.62	14.41	1.003	14.73	14.69	0.974	15.76	16.19	1.025	19.8	19.31	1.1307	48.1596	2	2	2	0	0	0	0	0	0	0	0	0	0	0	0	0	0	0	0	0	0	0	0	0	0	0	0	0	0	0	0
102	110036	1.406	95.43	67.89	1.21	19.46	16.09	1.489	26.63	17.88	1.569	25.74	16.4	1.348	23.6	17.51	1.143	40.5714	2	2	2	0	0	0	0	0	0	0	0	0	0	0	0	0	0	0	0	0	0	0	0	0	0	0	0	0	0	0	0
103	110038	0.709	32.02	45.14	0.647	7.31	11.29	0.669	6.78	10.14	0.746	8.81	11.82	0.766	9.12	11.9	1.1401	49.3871	2	2	2	0	0	0	0	0	0	0	0	0	0	0	0	0	0	0	0	0	0	0	0	0	0	0	0	0	0	0	0
104	110045	0.902	50.16	55.6	0.797	10.26	12.88	0.901	12.05	13.37	0.946	13.46	14.24	0.952	14.38	15.11	1.149	41.3802	2	2	2	0	0	0	0	0	0	0	0	0	0	0	0	0	0	0	0	0	0	0	0	0	0	0	0	0	0	0	0
105	110056	0.824	59.86	72.6	0.875	13.06	14.92	0.837	14.98	17.9	0.735	13.57	18.47	0.856	18.25	21.31	1.1311	44.9146	2	2	2	0	0	0	0	0	0	0	0	0	0	0	0	0	0	0	0	0	0	0	0	0	0	0	0	0	0	0	0
106	110061	0.844	49.84	59.04	0.754	9.89	13.12	0.792	10.79	13.63	0.904	14.03	15.52	0.903	15.14	16.77	1.1543	41.5222	2	2	2	0	0	0	0	0	0	0	0	0	0	0	0	0	0	0	0	0	0	0	0	0	0	0	0	0	0	0	0
107	110065	0.942	62.75	66.64	0.839	11.72	13.96	0.941	14.51	15.42	0.99	18.6	18.79	0.971	17.93	18.47	1.1586	41.9835	2	2	2	0	0	0	0	0	0	0	0	0	0	0	0	0	0	0	0	0	0	0	0	0	0	0	0	0	0	0	0
108	110079	0.943	46.03	48.8	0.824	8.33	10.11	0.946	10.46	11.05	1.019	13.36	13.11	0.955	13.88	14.53	1.1328	43.5604	2	1	2	0	1	0	0	0	0	0	0	0	0	0	0	50	2	1	0	0	0	0	0	0	0	0	0	0	0	0	0
109	110090	1.2	74.53	62.08	1.192	16.28	13.66	1.175	17.31	14.73	1.245	20.39	16.38	1.187	20.55	17.31	1.146	38.7462	2	2	2	0	0	0	0	0	0	0	0	0	0	0	0	0	0	0	0	0	0	0	0	0	0	0	0	0	0	0	0
110	110096	0.922	61.77	66.98	0.943	13.86	14.7	0.955	15.77	16.51	0.924	15.74	17.05	0.876	16.41	18.72	1.1296	44.5161	2	2	2	0	0	0	0	0	0	0	0	0	0	0	0	0	0	0	0	0	0	0	0	0	0	0	0	0	0	0	0
111	110124	0.985	49.65	50.43	0.959	11.16	11.64	0.962	11.56	12.01	0.984	12.92	13.13	1.028	14.02	13.64	1.1237	43.8955	2	1	2	0	1	0	0	0	0	0	0	0	0	0	0	52	2	3	0	0	0	0	0	0	0	0	0	0	0	0	0
112	110129	1.06	65.96	62.22	1.041	14.34	13.77	1.068	15.24	14.26	1.014	15.04	14.83	1.103	21.35	19.35	1.1274	40.9842	2	2	2	0	0	0	0	0	0	0	0	0	0	0	0	0	0	0	0	0	0	0	0	0	0	0	0	0	0	0	0
113	110130	0.929	52.78	56.82	0.871	13.02	14.95	0.918	11.86	12.92	0.971	13.91	14.32	0.957	13.99	14.63	1.1328	45.8416	2	2	2	0	0	0	0	0	0	0	0	0	0	0	0	0	0	0	0	0	0	0	0	0	0	0	0	0	0	0	0
114	110144	1.144	76.18	66.61	1.045	15.22	14.56	1.158	17.48	15.09	1.165	18.99	16.31	1.186	24.49	20.65	1.1562	43.3512	2	2	2	0	0	0	0	0	0	0	0	0	0	0	0	0	0	0	0	0	0	0	0	0	0	0	0	0	0	0	0
115	110147	0.834	40.78	48.9	0.845	9.26	10.97	0.857	10.11	11.8	0.823	9.83	11.95	0.816	11.58	14.19	1.1365	44.966	2	2	2	0	0	0	0	0	0	0	0	0	0	0	0	0	0	0	0	0	0	0	0	0	0	0	0	0	0	0	0
116	110153	0.992	53.66	54.08	1.01	12.07	11.95	0.948	12.24	12.9	0.996	13.96	14.01	1.012	15.4	15.22	1.1452	40.8932	2	2	2	0	0	0	0	0	0	0	0	0	0	0	0	0	0	0	0	0	0	0	0	0	0	0	0	0	0	0	0
117	110161	1.122	65.62	58.48	1.067	13.22	12.39	1.14	16.06	14.09	1.175	18.38	15.64	1.098	17.96	16.35	1.1316	43.3847	2	2	2	0	0	0	0	0	0	0	0	0	0	0	0	0	0	0	0	0	0	0	0	0	0	0	0	0	0	0	0
118	110165	1.401	110.24	78.7	1.378	24.53	17.8	1.357	26.19	19.3	1.457	28.88	19.82	1.407	30.64	21.78	1.1315	41.9674	2	2	2	0	0	0	0	0	0	0	0	0	0	0	0	0	0	0	0	0	0	0	0	0	0	0	0	0	0	0	0
119	110168	1.107	58.18	52.55	1.024	11.78	11.5	1.056	13.28	12.57	1.151	14.81	12.87	1.174	18.31	15.6	1.1332	44.3785	2	2	2	0	0	0	0	0	0	0	0	0	0	0	0	0	0	0	0	0	0	0	0	0	0	0	0	0	0	0	0
120	110172	0.778	37.19	47.83	0.848	9.05	10.67	0.796	8.84	11.11	0.779	10.47	13.44	0.701	8.83	12.6	1.137	43.2858	2	2	2	0	0	0	0	0	0	0	0	0	0	0	0	0	0	0	0	0	0	0	0	0	0	0	0	0	0	0	0
121	110178	1.152	62.69	54.4	1.017	12.22	12.01	1.051	14.23	13.55	1.22	18.32	15.01	1.296	17.92	13.82	1.1288	48.8891	2	2	2	0	0	0	0	0	0	0	0	0	0	0	0	0	0	0	0	0	0	0	0	0	0	0	0	0	0	0	0
122	110187	1.221	81.22	66.52	1.183	16.37	13.84	1.136	19.13	16.84	1.277	20.17	15.79	1.275	25.56	20.05	1.132	40.3502	2	2	2	0	0	0	0	0	0	0	0	0	0	0	0	0	0	0	0	0	0	0	0	0	0	0	0	0	0	0	0
123	110194	0.964	54.86	56.88	0.921	12.48	13.56	0.999	14.73	14.75	0.984	14.22	14.46	0.951	13.42	14.11	1.1399	39.4442	2	2	2	0	0	0	0	0	0	0	0	0	0	0	0	0	0	0	0	0	0	0	0	0	0	0	0	0	0	0	0
124	110200	1.116	61.17	54.81	1.041	13.57	13.03	1.048	14.26	13.61	1.166	16.27	13.95	1.2	17.07	14.22	1.1336	45.7064	2	2	2	0	0	0	0	0	0	0	0	0	0	0	0	0	0	0	0	0	0	0	0	0	0	0	0	0	0	0	0
125	110241	0.823	48.02	58.33	0.75	10.06	13.42	0.781	10.8	13.83	0.859	13.16	15.32	0.888	14.01	15.77	1.1241	44.8386	2	2	2	0	0	0	0	0	0	0	0	0	0	0	0	0	0	0	0	0	0	0	0	0	0	0	0	0	0	0	0
126	110251	1.01	56.24	55.69	0.993	11.08	11.17	1.028	13.07	12.72	1.044	14.59	13.98	0.982	17.49	17.82	1.1346	45.0955	2	2	2	0	0	0	0	0	0	0	0	0	0	0	0	0	0	0	0	0	0	0	0	0	0	0	0	0	0	0	0
127	110254	1.087	66.47	61.15	1.065	14.27	13.4	1.091	15.86	14.54	1.083	16.63	15.36	1.105	19.71	17.84	1.1371	48.9866	2	2	2	0	0	0	0	0	0	0	0	0	0	0	0	0	0	0	0	0	0	0	0	0	0	0	0	0	0	0	0
128	110258	0.78	53.33	68.35	0.66	10.05	15.23	0.769	13.19	17.14	0.802	13.32	16.61	0.866	16.77	19.36	1.1519	41.2518	2	2	2	0	0	0	0	0	0	0	0	0	0	0	0	0	0	0	0	0	0	0	0	0	0	0	0	0	0	0	0
129	110264	0.976	63.7	65.29	0.957	14.81	15.48	0.965	15.1	15.64	1.053	17.5	16.62	0.928	16.29	17.55	1.131	42.7592	2	2	2	0	0	0	0	0	0	0	0	0	0	0	0	0	0	0	0	0	0	0	0	0	0	0	0	0	0	0	0
130	110273	1.012	48.17	47.58	0.876	9.37	10.7	0.944	10.97	11.63	1.105	13.3	12.04	1.099	14.53	13.22	1.1498	40.9108	2	2	2	0	0	0	0	0	0	0	0	0	0	0	0	0	0	0	0	0	0	0	0	0	0	0	0	0	0	0	0
131	110287	1.095	66.64	60.84	1.008	14.05	13.94	1.08	16.07	14.88	1.149	18.24	15.87	1.132	18.28	16.15	1.1338	43.9821	2	2	2	0	0	0	0	0	0	0	0	0	0	0	0	0	0	0	0	0	0	0	0	0	0	0	0	0	0	0	0
132	110290	0.905	55.61	61.44	0.841	11.1	13.2	0.903	13.2	14.61	0.897	14.49	16.16	0.963	16.82	17.47	1.1512	44.5947	2	2	2	0	0	0	0	0	0	0	0	0	0	0	0	0	0	0	0	0	0	0	0	0	0	0	0	0	0	0	0
133	110300	0.698	34.19	48.96	0.605	6.44	10.64	0.673	7.49	11.12	0.761	9.59	12.6	0.731	10.67	14.59	1.1496	46.6377	2	2	2	0	0	0	0	0	0	0	0	0	0	0	0	0	0	0	0	0	0	0	0	0	0	0	0	0	0	0	0
134	110306	1.033	47.04	45.53	0.975	10.33	10.6	1.014	11.18	11.02	1.085	12.73	11.73	1.052	12.81	12.18	1.1208	43.071	2	2	2	0	0	0	0	0	0	0	0	0	0	0	0	0	0	0	0	0	0	0	0	0	0	0	0	0	0	0	0
135	110310	0.877	36.79	41.95	0.805	7.57	9.4	0.793	6.25	7.88	0.896	10.82	12.08	0.966	12.16	12.59	1.1307	44.8537	2	2	2	0	0	0	0	0	0	0	0	0	0	0	0	0	0	0	0	0	0	0	0	0	0	0	0	0	0	0	0
136	110311	1.099	64.69	58.87	0.969	13.35	13.79	1.056	14	13.26	1.142	17.16	15.03	1.201	20.17	16.8	1.1527	43.9395	2	2	2	0	0	0	0	0	0	0	0	0	0	0	0	0	0	0	0	0	0	0	0	0	0	0	0	0	0	0	0
137	110317	0.851	52.43	61.63	0.795	10.91	13.72	0.844	12.4	14.7	0.92	14.32	15.56	0.838	14.79	17.65	1.1305	45.0531	2	2	2	0	0	0	0	0	0	0	0	0	0	0	0	0	0	0	0	0	0	0	0	0	0	0	0	0	0	0	0
138	110328	0.987	72.2	73.15	0.995	19.71	19.82	0.968	14.84	15.34	0.95	16.78	17.66	1.026	20.88	20.34	1.1429	38.3619	2	2	2	0	0	0	0	0	0	0	0	0	0	0	0	0	0	0	0	0	0	0	0	0	0	0	0	0	0	0	0
139	110350	0.999	54.62	54.67	0.9	10.47	11.64	0.935	11.62	12.42	1.035	15.35	14.84	1.089	17.17	15.77	1.1526	42.0131	2	2	2	0	0	0	0	0	0	0	0	0	0	0	0	0	0	0	0	0	0	0	0	0	0	0	0	0	0	0	0
140	110366	1.203	88.64	73.67	1.054	17.26	16.37	1.181	20.89	17.69	1.29	25.08	19.45	1.26	25.41	20.16	1.1417	41.9698	2	2	2	0	0	0	0	0	0	0	0	0	0	0	0	0	0	0	0	0	0	0	0	0	0	0	0	0	0	0	0
141	110372	1.238	91	73.49	1.127	18.53	16.44	1.221	22.29	18.26	1.246	24.89	19.98	1.344	25.3	18.82	1.1489	40.8084	2	2	2	0	0	0	0	0	0	0	0	0	0	0	0	0	0	0	0	0	0	0	0	0	0	0	0	0	0	0	0
142	110377	0.677	37.25	55.02	0.657	8.26	12.58	0.647	9.07	14.02	0.666	9.03	13.55	0.732	10.89	14.87	1.1271	48.2947	2	2	2	0	0	0	0	0	0	0	0	0	0	0	0	0	0	0	0	0	0	0	0	0	0	0	0	0	0	0	0
143	110384	0.797	52.25	65.52	0.712	10.65	14.96	0.781	11.86	15.18	0.812	13.6	16.74	0.866	16.14	18.64	1.1269	42.2691	2	2	2	0	0	0	0	0	0	0	0	0	0	0	0	0	0	0	0	0	0	0	0	0	0	0	0	0	0	0	0
144	110387	1.313	94.81	72.22	1.252	24.4	19.49	1.331	22.9	17.21	1.325	21.8	16.46	1.349	25.71	19.06	1.1383	38.9287	2	2	2	0	0	0	0	0	0	0	0	0	0	0	0	0	0	0	0	0	0	0	0	0	0	0	0	0	0	0	0
145	110390	1.172	71.96	61.38	1.116	16.4	14.7	1.171	17.36	14.82	1.212	18.26	15.06	1.187	19.93	16.79	1.1309	42.3203	2	2	2	0	0	0	0	0	0	0	0	0	0	0	0	0	0	0	0	0	0	0	0	0	0	0	0	0	0	0	0
146	110410	1.293	71.56	55.33	1.289	15.92	12.35	1.27	16.72	13.16	1.334	18.75	14.06	1.28	20.17	15.75	1.136	45.5075	2	2	2	0	0	0	0	0	0	0	0	0	0	0	0	0	0	0	0	0	0	0	0	0	0	0	0	0	0	0	0
147	110412	0.902	56.75	62.9	0.87	12.81	14.72	0.849	13.01	15.33	0.899	14.7	16.35	0.983	16.23	16.51	1.1485	43.195	2	2	2	0	0	0	0	0	0	0	0	0	0	0	0	0	0	0	0	0	0	0	0	0	0	0	0	0	0	0	0
148	110415	0.969	57.13	58.95	0.961	12.2	12.69	1.053	15.97	15.17	0.959	14.38	15	0.906	14.58	16.09	1.1579	40.3591	0	0	0	0	0	0	0	0	0	0	0	0	0	0	0	0	0	0	0	0	0	0	0	0	0	0	0	0	0	0	0
149	110421	1.272	65.57	51.55	1.237	15.3	12.37	1.353	16.03	11.85	1.314	16.71	12.72	1.199	17.53	14.62	1.133	47.0146	2	2	2	0	0	0	0	0	0	0	0	0	0	0	0	0	0	0	0	0	0	0	0	0	0	0	0	0	0	0	0
150	110426	1.073	76.08	70.91	1.092	17.26	15.81	1.124	19.41	17.27	1.088	18.65	17.15	1.004	20.75	20.68	1.133	46.7739	2	2	2	0	0	0	0	0	0	0	0	0	0	0	0	0	0	0	0	0	0	0	0	0	0	0	0	0	0	0	0
151	110434	1.21	79.28	65.53	1.096	17.11	15.61	1.167	17.63	15.11	1.256	21.06	16.77	1.303	23.48	18.03	1.1458	36.0859	2	2	2	0	0	0	0	0	0	0	0	0	0	0	0	0	0	0	0	0	0	0	0	0	0	0	0	0	0	0	0
152	110438	0.97	51.9	53.52	0.901	11.48	12.73	0.983	13.28	13.52	0.964	10.96	11.37	1.018	16.19	15.91	1.1329	45.5507	2	2	2	0	0	0	0	0	0	0	0	0	0	0	0	0	0	0	0	0	0	0	0	0	0	0	0	0	0	0	0
153	110441	1.387	98.13	70.72	1.304	21.86	16.77	1.4	24.16	17.25	1.388	25.18	18.14	1.451	26.93	18.56	1.139	42.8276	2	2	2	0	0	0	0	0	0	0	0	0	0	0	0	0	0	0	0	0	0	0	0	0	0	0	0	0	0	0	0
154	110443	0.729	42.1	57.77	0.736	10.65	14.47	0.698	9.26	13.27	0.748	10.61	14.19	0.731	11.58	15.84	1.1323	52.5394	2	2	2	0	0	0	0	0	0	0	0	0	0	0	0	0	0	0	0	0	0	0	0	0	0	0	0	0	0	0	0
155	110449	1.125	53.19	47.3	1.042	10.98	10.54	1.072	10.95	10.21	1.139	13.72	12.04	1.209	17.54	14.5	1.1287	41.5754	2	2	2	0	0	0	0	0	0	0	0	0	0	0	0	0	0	0	0	0	0	0	0	0	0	0	0	0	0	0	0
156	110454	0.89	47.32	53.18	0.771	8.23	10.67	0.898	11.63	12.95	0.925	14.47	15.65	0.934	12.99	13.91	1.1573	43.3795	2	2	2	0	0	0	0	0	0	0	0	0	0	0	0	0	0	0	0	0	0	0	0	0	0	0	0	0	0	0	0
157	110461	1.207	86.41	71.62	1.221	19.93	16.32	1.186	18.69	15.75	1.22	22.07	18.09	1.2	25.73	21.45	1.1241	47.9281	2	1	2	0	1	0	0	0	0	0	0	0	0	0	0	15	1	0	0	0	0	0	0	0	0	0	0	0	0	0	0
158	110495	1.241	64.13	51.69	1.085	13.01	12	1.162	12.93	11.13	1.298	17.84	13.75	1.373	20.35	14.82	1.1278	39.5564	2	2	2	0	0	0	0	0	0	0	0	0	0	0	0	0	0	0	0	0	0	0	0	0	0	0	0	0	0	0	0
159	110498	0.802	43.21	53.87	0.739	9.23	12.5	0.775	10.28	13.27	0.82	11.39	13.89	0.867	12.31	14.21	1.1402	48.1794	2	2	2	0	0	0	0	0	0	0	0	0	0	0	0	0	0	0	0	0	0	0	0	0	0	0	0	0	0	0	0
160	110506	0.974	71.77	73.7	0.901	15.59	17.3	1.033	18.27	17.69	0.983	18.16	18.47	0.976	19.76	20.24	1.1337	48.1393	2	2	2	0	0	0	0	0	0	0	0	0	0	0	0	0	0	0	0	0	0	0	0	0	0	0	0	0	0	0	0
161	110508	0.814	43.4	53.34	0.815	9.98	12.24	0.796	10.29	12.92	0.824	11.51	13.98	0.819	11.62	14.2	1.1483	43.9586	2	2	2	0	0	0	0	0	0	0	0	0	0	0	0	0	0	0	0	0	0	0	0	0	0	0	0	0	0	0	0
162	110509	0.955	64.61	67.62	0.873	13.6	15.57	0.953	14.32	15.03	1.002	17.64	17.6	0.981	19.05	19.41	1.1255	45.2571	2	2	2	0	0	0	0	0	0	0	0	0	0	0	0	0	0	0	0	0	0	0	0	0	0	0	0	0	0	0	0
163	110510	1.062	66.11	62.25	1.004	13.09	13.04	1.041	15	14.41	1.056	18.41	17.43	1.129	19.61	17.37	1.1282	45.5211	2	2	2	0	0	0	0	0	0	0	0	0	0	0	0	0	0	0	0	0	0	0	0	0	0	0	0	0	0	0	0
164	110518	0.97	54.72	56.4	0.974	11.91	12.22	0.944	13.1	13.88	0.985	14.33	14.54	0.976	15.38	15.76	1.1402	46.6113	2	2	2	0	0	0	0	0	0	0	0	0	0	0	0	0	0	0	0	0	0	0	0	0	0	0	0	0	0	0	0
165	110522	1.324	86.15	65.05	1.174	17.17	14.63	1.269	19.57	15.43	1.369	21.9	16	1.448	27.51	19	1.1259	44.2259	2	2	2	0	0	0	0	0	0	0	0	0	0	0	0	0	0	0	0	0	0	0	0	0	0	0	0	0	0	0	0
166	110524	1.55	132.18	85.26	1.409	25.21	17.89	1.525	28.54	18.72	1.605	37.7	23.48	1.618	40.73	25.17	1.1477	36.2907	2	2	2	0	0	0	0	0	0	0	0	0	0	0	0	0	0	0	0	0	0	0	0	0	0	0	0	0	0	0	0
167	110544	0.98	72.96	74.46	0.949	15	15.8	0.909	15.41	16.95	0.995	19.72	19.83	1.043	22.83	21.89	1.1411	39.8733	2	2	2	0	0	0	0	0	0	0	0	0	0	0	0	0	0	0	0	0	0	0	0	0	0	0	0	0	0	0	0
168	110586	1.028	72.01	70.07	0.929	13.99	15.06	0.993	15.84	15.94	1.058	17.45	16.5	1.096	24.73	22.56	1.137	45.6346	2	2	2	0	0	0	0	0	0	0	0	0	0	0	0	0	0	0	0	0	0	0	0	0	0	0	0	0	0	0	0
169	110588	1.157	68.46	59.15	1.102	14.04	12.74	1.17	15.99	13.67	1.157	19.22	16.61	1.191	19.21	16.13	1.1404	45.5448	2	2	2	0	0	0	0	0	0	0	0	0	0	0	0	0	0	0	0	0	0	0	0	0	0	0	0	0	0	0	0
170	110607	1.043	53.39	51.16	1.035	11.15	10.78	1.065	12.73	11.95	1.102	14.9	13.52	0.979	14.61	14.92	1.1323	46.2951	2	2	2	0	0	0	0	0	0	0	0	0	0	0	0	0	0	0	0	0	0	0	0	0	0	0	0	0	0	0	0
171	110608	1.239	82.51	66.61	1.201	16.74	13.94	1.246	19.81	15.9	1.284	23.07	17.96	1.218	22.9	18.8	1.1543	38.8397	2	1	2	0	1	0	0	0	0	0	0	0	0	0	0	10	1	0	0	0	0	0	0	0	0	0	0	0	0	0	0
172	110611	0.858	45.57	53.08	0.75	8.46	11.29	0.853	9.24	10.84	0.89	13.54	15.22	0.91	14.32	15.73	1.1293	48.4732	2	1	2	0	1	0	0	0	0	0	0	0	0	0	0	64	2	1	0	0	0	0	0	0	0	0	0	0	0	0	0
173	110613	0.866	52.32	60.43	0.834	12.11	14.52	0.9	13.8	15.32	0.87	12.51	14.38	0.858	13.9	16.21	1.1343	49.3268	2	2	2	0	0	0	0	0	0	0	0	0	0	0	0	0	0	0	0	0	0	0	0	0	0	0	0	0	0	0	0
174	110615	1.096	66.13	60.36	0.962	12.55	13.05	1.072	14.7	13.71	1.168	18.76	16.07	1.147	20.12	17.53	1.1403	41.9156	2	2	2	0	0	0	0	0	0	0	0	0	0	0	0	0	0	0	0	0	0	0	0	0	0	0	0	0	0	0	0
175	110625	1.074	64.25	59.81	1.032	14.17	13.73	1.053	15.94	15.14	1.155	18.07	15.65	1.051	16.06	15.29	1.1385	44.2894	2	1	1	0	1	1	0	0	0	0	0	0	0	0	0	6	1	0	0	0	0	0	0	0	0	0	0	0	0	0	0
176	110628	0.685	44.95	65.58	0.637	9.83	15.44	0.686	10.85	15.8	0.721	11.76	16.31	0.694	12.52	18.03	1.1557	42.9594	2	2	2	0	0	0	0	0	0	0	0	0	0	0	0	0	0	0	0	0	0	0	0	0	0	0	0	0	0	0	0
177	110629	0.616	29.8	48.35	0.619	7.05	11.38	0.581	6.94	11.94	0.605	8.65	14.29	0.667	7.16	10.74	1.1328	46.0634	2	2	2	0	0	0	0	0	0	0	0	0	0	0	0	0	0	0	0	0	0	0	0	0	0	0	0	0	0	0	0
178	110631	1.026	41.72	40.67	0.91	9.7	10.66	1.085	13.7	12.62	1.118	16.03	14.33	1.02	15.99	15.68	1.1482	42.5273	2	2	2	0	0	0	0	0	0	0	0	0	0	0	0	0	0	0	0	0	0	0	0	0	0	0	0	0	0	0	0
179	110638	1.067	66.46	62.27	1.025	14.81	14.46	1.05	15.89	15.13	1.064	17.03	16	1.123	18.73	16.67	1.1226	39.4489	2	2	2	0	0	0	0	0	0	0	0	0	0	0	0	0	0	0	0	0	0	0	0	0	0	0	0	0	0	0	0
180	110639	1.17	69.6	59.49	1.056	15.06	14.26	1.16	16.54	14.26	1.197	18.92	15.8	1.258	19.08	15.16	1.1399	42.0464	2	2	2	0	0	0	0	0	0	0	0	0	0	0	0	0	0	0	0	0	0	0	0	0	0	0	0	0	0	0	0
181	110651	1.208	104.03	86.14	1.092	19.91	18.23	1.183	23.14	19.56	1.215	26.23	21.58	1.298	34.74	26.76	1.1345	42.7375	2	2	2	0	0	0	0	0	0	0	0	0	0	0	0	0	0	0	0	0	0	0	0	0	0	0	0	0	0	0	0
182	110662	0.996	50.55	50.78	0.915	11.08	12.11	0.988	10.92	11.06	1.076	14.74	13.7	0.993	13.81	13.91	1.1354	47.2087	2	2	2	0	0	0	0	0	0	0	0	0	0	0	0	0	0	0	0	0	0	0	0	0	0	0	0	0	0	0	0
183	110673	1.169	75.11	64.26	1.167	17.53	15.03	1.117	15.96	14.29	1.209	19.75	16.33	1.175	21.87	18.61	1.1231	41.6683	1	2	2	1	0	0	58	2	3	0	0	0	0	0	0	0	0	0	0	0	0	0	0	0	0	0	0	0	0	0	0
184	110690	1.007	66.04	65.61	1.062	15.72	14.8	1.019	16.1	15.81	0.985	16.61	16.86	0.971	17.61	18.15	1.131	44.6532	2	2	2	0	0	0	0	0	0	0	0	0	0	0	0	0	0	0	0	0	0	0	0	0	0	0	0	0	0	0	0
185	110699	1.254	68.74	54.83	1.185	14.33	12.1	1.171	14.87	12.71	1.294	18.33	14.16	1.336	21.21	15.87	1.1183	43.9487	2	2	2	0	0	0	0	0	0	0	0	0	0	0	0	0	0	0	0	0	0	0	0	0	0	0	0	0	0	0	0
186	110700	1.299	93.56	72.04	1.176	18.54	15.76	1.283	22.82	17.78	1.343	25.75	19.18	1.369	26.44	19.32	1.1288	43.4121	2	2	2	0	0	0	0	0	0	0	0	0	0	0	0	0	0	0	0	0	0	0	0	0	0	0	0	0	0	0	0
187	110703	1.522	121.4	79.76	1.504	28.62	19.04	1.615	27.46	17.01	1.517	29.19	19.25	1.476	36.13	24.47	1.1307	45.5013	2	2	2	0	0	0	0	0	0	0	0	0	0	0	0	0	0	0	0	0	0	0	0	0	0	0	0	0	0	0	0
188	110704	1.246	86.95	69.77	1.069	16.32	15.27	1.209	21.3	17.62	1.31	24.36	18.6	1.365	24.96	18.29	1.1302	46.0565	2	2	2	0	0	0	0	0	0	0	0	0	0	0	0	0	0	0	0	0	0	0	0	0	0	0	0	0	0	0	0
189	110706	0.789	49.48	62.71	0.776	11.09	14.3	0.803	12.69	15.8	0.794	12.44	15.68	0.784	13.27	16.93	1.1295	43.9268	2	2	2	0	0	0	0	0	0	0	0	0	0	0	0	0	0	0	0	0	0	0	0	0	0	0	0	0	0	0	0
190	110709	1.12	81.56	72.85	1.118	18.81	16.83	1.091	20.21	18.52	1.166	21.34	18.3	1.104	21.19	19.2	1.129	43.6332	2	2	2	0	0	0	0	0	0	0	0	0	0	0	0	0	0	0	0	0	0	0	0	0	0	0	0	0	0	0	0
191	110712	0.735	34.57	47.06	0.685	7.23	10.55	0.661	6.76	10.22	0.781	9.98	12.78	0.785	10.61	13.51	1.1505	44.3423	2	2	2	0	0	0	0	0	0	0	0	0	0	0	0	0	0	0	0	0	0	0	0	0	0	0	0	0	0	0	0
192	110715	0.96	69.38	72.26	0.991	15.95	16.09	1.04	17.99	17.3	0.934	17.87	19.13	0.89	17.57	19.74	1.1333	45.619	2	2	2	0	0	0	0	0	0	0	0	0	0	0	0	0	0	0	0	0	0	0	0	0	0	0	0	0	0	0	0
193	110716	0.884	36.09	40.82	0.836	7.07	8.45	0.953	9.58	10.06	0.93	9.86	10.6	0.818	9.58	11.71	1.1468	41.6158	2	2	2	0	0	0	0	0	0	0	0	0	0	0	0	0	0	0	0	0	0	0	0	0	0	0	0	0	0	0	0
194	110723	0.938	58.98	62.88	0.844	11.5	13.63	0.929	13.49	14.52	0.991	16.17	16.32	0.968	17.82	18.42	1.1344	44.031	2	1	2	0	2	0	0	0	0	0	0	0	0	0	0	12	1	0	14	1	0	0	0	0	0	0	0	0	0	0	0
195	110726	1.195	92.53	77.43	1.123	17.85	15.89	1.208	22.03	18.25	1.199	25.38	21.17	1.233	27.27	22.13	1.151	40.7951	2	1	2	0	2	0	0	0	0	0	0	0	0	0	0	55	2	2	50	2	1	0	0	0	0	0	0	0	0	0	0
196	110742	0.832	51.61	62.03	0.738	10.02	13.58	0.805	11.98	14.89	0.918	15.15	16.51	0.847	14.45	17.05	1.1545	44.3102	2	2	2	0	0	0	0	0	0	0	0	0	0	0	0	0	0	0	0	0	0	0	0	0	0	0	0	0	0	0	0
197	110751	0.777	43.76	56.34	0.713	9.03	12.68	0.806	10.51	13.03	0.845	12.81	15.15	0.738	11.42	15.48	1.1547	40.6723	2	1	2	0	1	0	0	0	0	0	0	0	0	0	0	42	1	0	0	0	0	0	0	0	0	0	0	0	0	0	0
198	110762	1.283	87.49	68.22	1.281	22.01	17.18	1.308	20.7	15.83	1.314	22.17	16.88	1.234	22.61	18.32	1.1379	40.1398	2	2	2	0	0	0	0	0	0	0	0	0	0	0	0	0	0	0	0	0	0	0	0	0	0	0	0	0	0	0	0
199	110765	1.072	55.65	51.91	0.989	11.22	11.34	1.074	12.45	11.59	1.131	15.18	13.43	1.081	16.81	15.55	1.1466	42.2336	2	2	2	0	0	0	0	0	0	0	0	0	0	0	0	0	0	0	0	0	0	0	0	0	0	0	0	0	0	0	0
200	110776	0.827	44	53.22	0.81	9.01	11.13	0.857	11.46	13.38	0.839	11.51	13.71	0.802	12.02	14.99	1.1491	43.6197	2	2	2	0	0	0	0	0	0	0	0	0	0	0	0	0	0	0	0	0	0	0	0	0	0	0	0	0	0	0	0
201	110779	0.826	48.02	58.15	0.793	8.8	11.1	0.823	9.84	11.96	0.854	13.46	15.77	0.824	15.92	19.32	1.1272	50.4301	2	2	2	0	0	0	0	0	0	0	0	0	0	0	0	0	0	0	0	0	0	0	0	0	0	0	0	0	0	0	0
202	110791	0.652	30.03	46.05	0.609	6.39	10.5	0.608	6.3	10.35	0.647	7.82	12.09	0.726	9.52	13.11	1.1376	48.6168	2	2	2	0	0	0	0	0	0	0	0	0	0	0	0	0	0	0	0	0	0	0	0	0	0	0	0	0	0	0	0
203	110806	0.591	28.87	48.86	0.648	6.67	10.29	0.594	6.64	11.19	0.58	6.72	11.6	0.56	8.84	15.78	1.1416	37.3325	2	2	2	0	0	0	0	0	0	0	0	0	0	0	0	0	0	0	0	0	0	0	0	0	0	0	0	0	0	0	0
204	110813	0.845	52.37	62	0.917	13.73	14.98	0.856	11.36	13.28	0.794	12.09	15.23	0.82	15.18	18.51	1.1395	40.233	2	2	2	0	0	0	0	0	0	0	0	0	0	0	0	0	0	0	0	0	0	0	0	0	0	0	0	0	0	0	0
205	110820	0.955	57.43	60.13	0.936	13.89	14.84	0.924	13.38	14.48	0.981	14.4	14.68	0.977	15.76	16.13	1.1448	38.7528	2	2	2	0	0	0	0	0	0	0	0	0	0	0	0	0	0	0	0	0	0	0	0	0	0	0	0	0	0	0	0
206	110821	1.194	69.23	57.99	1.138	14.04	12.34	1.111	17.99	16.19	1.257	20.61	16.4	1.27	16.59	13.06	1.1325	42.9611	2	2	2	0	0	0	0	0	0	0	0	0	0	0	0	0	0	0	0	0	0	0	0	0	0	0	0	0	0	0	0
207	110822	0.749	40.77	54.4	0.73	9.18	12.57	0.734	9.16	12.48	0.764	10.51	13.76	0.765	11.93	15.6	1.1329	46.1839	2	2	2	0	0	0	0	0	0	0	0	0	0	0	0	0	0	0	0	0	0	0	0	0	0	0	0	0	0	0	0
208	110841	1.246	84.69	67.95	1.15	17.31	15.04	1.215	17.13	14.1	1.321	22.89	17.33	1.274	27.36	21.48	1.1246	41.2716	2	1	2	0	2	0	0	0	0	0	0	0	0	0	0	15	1	0	25	1	0	0	0	0	0	0	0	0	0	0	0
209	110849	1.073	69.28	64.55	1.041	16.21	15.57	1.08	16.04	14.85	1.099	18.92	17.21	1.07	18.11	16.93	1.139	44.2963	2	1	2	0	2	0	0	0	0	0	0	0	0	0	0	26	1	0	32	1	0	0	0	0	0	0	0	0	0	0	0
210	110852	1.187	83.84	70.66	1.092	17.09	15.65	1.162	18.71	16.11	1.218	22.47	18.45	1.25	25.57	20.45	1.1381	41.6607	2	2	2	0	0	0	0	0	0	0	0	0	0	0	0	0	0	0	0	0	0	0	0	0	0	0	0	0	0	0	0
211	110859	1.372	86.26	62.89	1.288	16.74	13	1.409	20.87	14.81	1.431	25.7	17.97	1.341	22.94	17.1	1.1386	35.9173	2	2	2	0	0	0	0	0	0	0	0	0	0	0	0	0	0	0	0	0	0	0	0	0	0	0	0	0	0	0	0
212	110861	0.73	36.44	49.9	0.67	8.1	12.1	0.72	8.11	11.25	0.729	9.26	12.71	0.792	10.97	13.84	1.125	45.8394	2	2	2	0	0	0	0	0	0	0	0	0	0	0	0	0	0	0	0	0	0	0	0	0	0	0	0	0	0	0	0
213	110866	1.22	75.06	61.52	1.248	16.59	13.29	1.214	18.05	14.87	1.258	19.47	15.48	1.172	20.95	17.87	1.1465	40.7945	2	2	2	0	0	0	0	0	0	0	0	0	0	0	0	0	0	0	0	0	0	0	0	0	0	0	0	0	0	0	0
214	110872	0.765	40.93	53.47	0.705	8.18	11.61	0.745	9.22	12.38	0.827	11.65	14.08	0.772	11.88	15.4	1.1391	48.9268	2	2	2	0	0	0	0	0	0	0	0	0	0	0	0	0	0	0	0	0	0	0	0	0	0	0	0	0	0	0	0
215	110875	0.944	58.68	62.16	0.858	12.27	14.31	0.906	13.4	14.8	1.03	17.06	16.56	0.967	15.95	16.49	1.1342	44.6246	2	2	2	0	0	0	0	0	0	0	0	0	0	0	0	0	0	0	0	0	0	0	0	0	0	0	0	0	0	0	0
216	110879	1.006	59.71	59.36	0.891	12.55	14.09	1.01	12.92	12.78	1.092	16.11	14.76	1.023	18.14	17.73	1.1253	43.8814	2	1	2	0	1	0	0	0	0	0	0	0	0	0	0	44	1	0	0	0	0	0	0	0	0	0	0	0	0	0	0
217	110886	1.028	68.75	66.89	0.998	14.8	14.84	1.007	16.12	16	0.999	16.62	16.63	1.093	21.21	19.41	1.1322	42.1391	2	2	2	0	0	0	0	0	0	0	0	0	0	0	0	0	0	0	0	0	0	0	0	0	0	0	0	0	0	0	0
218	110889	0.886	49.24	55.6	0.871	10.4	11.94	0.853	10.9	12.78	0.852	11.52	13.53	0.946	16.42	17.36	1.1515	41.2533	2	2	2	0	0	0	0	0	0	0	0	0	0	0	0	0	0	0	0	0	0	0	0	0	0	0	0	0	0	0	0
219	110891	0.935	52.34	55.99	0.91	12.13	13.33	0.963	12.84	13.34	0.982	13.87	14.12	0.888	13.5	15.21	1.1349	44.9664	2	2	2	0	0	0	0	0	0	0	0	0	0	0	0	0	0	0	0	0	0	0	0	0	0	0	0	0	0	0	0
220	110894	1.284	60.71	47.28	1.166	11	9.43	1.308	14.72	11.26	1.386	15.8	11.4	1.263	19.18	15.19	1.1389	44.4443	1	2	2	1	0	0	31	1	0	0	0	0	0	0	0	0	0	0	0	0	0	0	0	0	0	0	0	0	0	0	0
221	110897	1.072	63.96	59.67	0.988	13.62	13.79	1.141	17.34	15.2	1.126	17.17	15.24	1.025	15.83	15.44	1.1554	42.5501	2	2	2	0	0	0	0	0	0	0	0	0	0	0	0	0	0	0	0	0	0	0	0	0	0	0	0	0	0	0	0
222	110906	1.089	64	58.79	1.061	13.66	12.88	1.033	15.46	14.96	1.117	17.42	15.59	1.137	17.46	15.36	1.1284	49.4582	2	2	2	0	0	0	0	0	0	0	0	0	0	0	0	0	0	0	0	0	0	0	0	0	0	0	0	0	0	0	0
223	110909	1.058	58.7	55.48	0.972	12.79	13.16	1.044	13.48	12.91	1.097	14.47	13.19	1.107	17.95	16.22	1.144	39.8799	2	2	2	0	0	0	0	0	0	0	0	0	0	0	0	0	0	0	0	0	0	0	0	0	0	0	0	0	0	0	0
224	110915	1.002	57.93	57.83	0.971	14.16	14.58	0.965	14.11	14.62	1.032	13.8	13.38	1.039	15.85	15.26	1.1313	45.4428	2	2	2	0	0	0	0	0	0	0	0	0	0	0	0	0	0	0	0	0	0	0	0	0	0	0	0	0	0	0	0
225	110925	1.034	60.22	58.23	1.052	15.86	15.07	1.088	15.44	14.18	1.025	13.6	13.27	0.976	15.33	15.71	1.1333	37.4126	2	2	2	0	0	0	0	0	0	0	0	0	0	0	0	0	0	0	0	0	0	0	0	0	0	0	0	0	0	0	0
226	110935	0.845	32.96	39.02	0.776	9.52	12.27	0.84	11.01	13.1	0.781	9.78	12.52	0.91	12.43	13.65	1.1367	41.7292	2	2	2	0	0	0	0	0	0	0	0	0	0	0	0	0	0	0	0	0	0	0	0	0	0	0	0	0	0	0	0
227	110936	1.345	115.91	86.18	1.296	32.32	24.93	1.363	25.25	18.52	1.395	28.96	20.76	1.337	29.38	21.97	1.1291	42.3578	2	2	2	0	0	0	0	0	0	0	0	0	0	0	0	0	0	0	0	0	0	0	0	0	0	0	0	0	0	0	0
228	110940	0.75	38.34	51.1	0.695	8.05	11.58	0.751	10.18	13.56	0.782	10.52	13.46	0.767	9.59	12.51	1.1479	38.6906	2	2	2	0	0	0	0	0	0	0	0	0	0	0	0	0	0	0	0	0	0	0	0	0	0	0	0	0	0	0	0
229	110941	0.871	43.77	50.23	0.789	9.66	12.25	0.862	11.04	12.81	0.893	11.81	13.22	0.942	11.26	11.96	1.1323	44.0404	2	2	2	0	0	0	0	0	0	0	0	0	0	0	0	0	0	0	0	0	0	0	0	0	0	0	0	0	0	0	0
230	110942	0.861	43.22	50.2	0.81	8.79	10.85	0.853	10.17	11.93	0.897	11.3	12.6	0.875	12.96	14.82	1.1464	40.7603	2	2	2	0	0	0	0	0	0	0	0	0	0	0	0	0	0	0	0	0	0	0	0	0	0	0	0	0	0	0	0
231	110950	0.873	58.8	67.37	0.777	11.03	14.19	0.86	14.34	16.67	0.889	15.3	17.22	0.94	18.13	19.29	1.1212	46.5428	2	2	2	0	0	0	0	0	0	0	0	0	0	0	0	0	0	0	0	0	0	0	0	0	0	0	0	0	0	0	0
232	110953	0.695	29.11	41.86	0.66	6.44	9.76	0.69	6.66	9.64	0.727	8.41	11.56	0.698	7.61	10.9	1.1606	42.5473	2	2	2	0	0	0	0	0	0	0	0	0	0	0	0	0	0	0	0	0	0	0	0	0	0	0	0	0	0	0	0
233	110959	0.961	49.11	51.12	1.001	12.2	12.18	0.916	11.3	12.35	0.941	12.3	13.08	0.985	13.31	13.52	1.1325	35.7834	2	2	2	0	0	0	0	0	0	0	0	0	0	0	0	0	0	0	0	0	0	0	0	0	0	0	0	0	0	0	0
234	110961	1.049	66.17	63.09	0.963	13.96	14.5	1.02	16.02	15.7	1.101	17.65	16.04	1.1	18.54	16.85	1.154	40.7449	2	2	2	0	0	0	0	0	0	0	0	0	0	0	0	0	0	0	0	0	0	0	0	0	0	0	0	0	0	0	0
235	110975	1.374	90.23	65.67	1.336	18.38	13.76	1.319	20.99	15.91	1.454	25.35	17.43	1.374	25.51	18.56	1.143	40.5714	2	2	2	0	0	0	0	0	0	0	0	0	0	0	0	0	0	0	0	0	0	0	0	0	0	0	0	0	0	0	0
236	110979	1.147	66.58	58.06	1.085	14.42	13.28	1.181	16.96	14.36	1.157	16.14	13.95	1.158	19.07	16.47	1.1287	43.6481	2	2	2	0	0	0	0	0	0	0	0	0	0	0	0	0	0	0	0	0	0	0	0	0	0	0	0	0	0	0	0
237	110987	0.977	67.24	68.84	0.873	13.54	15.51	0.958	15.36	16.03	1.023	17.94	17.54	1.032	20.39	19.76	1.1333	47.6011	2	2	2	0	0	0	0	0	0	0	0	0	0	0	0	0	0	0	0	0	0	0	0	0	0	0	0	0	0	0	0
238	110993	0.994	70.31	70.72	0.919	14.86	16.18	0.963	16.32	16.95	1.01	18.72	18.53	1.07	20.41	19.07	1.1357	42.1484	2	2	2	0	0	0	0	0	0	0	0	0	0	0	0	0	0	0	0	0	0	0	0	0	0	0	0	0	0	0	0
239	111008	1.027	66.68	64.92	0.904	13.65	15.1	1	15.58	15.58	1.069	16.15	15.11	1.114	21.31	19.13	1.1539	44.2669	2	2	2	0	0	0	0	0	0	0	0	0	0	0	0	0	0	0	0	0	0	0	0	0	0	0	0	0	0	0	0
240	111012	0.922	55.38	60.09	0.898	12.99	14.47	0.953	14.13	14.84	0.902	12.8	14.2	0.932	15.45	16.58	1.1529	41.8681	2	2	2	0	0	0	0	0	0	0	0	0	0	0	0	0	0	0	0	0	0	0	0	0	0	0	0	0	0	0	0
241	111036	1.022	67.78	66.3	0.979	14.84	15.15	1.017	16.01	15.73	1.045	18.28	17.49	1.042	18.65	17.91	1.1352	41.7403	2	2	1	0	0	1	0	0	0	0	0	0	0	0	0	0	0	0	0	0	0	0	0	0	0	0	0	0	0	0	0
242	111043	1.029	67.95	66.05	0.942	13.28	14.11	1.057	16.29	15.41	1.021	18.58	18.19	1.08	19.8	18.34	1.1342	48.0805	2	2	2	0	0	0	0	0	0	0	0	0	0	0	0	0	0	0	0	0	0	0	0	0	0	0	0	0	0	0	0
243	111046	1.147	68.73	59.9	1.155	15.99	13.85	1.125	15.01	13.34	1.119	16.52	14.76	1.181	21.21	17.96	1.1277	40.2259	2	2	2	0	0	0	0	0	0	0	0	0	0	0	0	0	0	0	0	0	0	0	0	0	0	0	0	0	0	0	0
244	111047	0.791	46.37	58.63	0.683	8.6	12.6	0.785	9.77	12.45	0.863	12.02	13.93	0.813	15.98	19.65	1.157	44.7195	2	2	2	0	0	0	0	0	0	0	0	0	0	0	0	0	0	0	0	0	0	0	0	0	0	0	0	0	0	0	0
245	111054	1.041	64.74	62.18	0.983	13.53	13.76	1.036	16.08	15.51	1.117	18.05	16.15	1.02	17.08	16.75	1.1332	45.5266	2	2	2	0	0	0	0	0	0	0	0	0	0	0	0	0	0	0	0	0	0	0	0	0	0	0	0	0	0	0	0
246	111062	1.15	96.72	84.08	1.101	19.58	17.78	1.132	21.43	18.94	1.17	26.1	22.31	1.182	29.61	25.06	1.1352	46.7631	2	2	2	0	0	0	0	0	0	0	0	0	0	0	0	0	0	0	0	0	0	0	0	0	0	0	0	0	0	0	0
247	111067	0.639	33.77	52.85	0.585	6.67	11.4	0.584	6.87	11.78	0.693	9.32	13.44	0.673	10.92	16.22	1.1535	42.8356	2	2	2	0	0	0	0	0	0	0	0	0	0	0	0	0	0	0	0	0	0	0	0	0	0	0	0	0	0	0	0
248	111075	1.228	80.72	65.73	1.227	18.03	14.69	1.244	17.47	14.05	1.277	20.58	16.12	1.18	24.64	20.87	1.1315	43.0109	2	2	2	0	0	0	0	0	0	0	0	0	0	0	0	0	0	0	0	0	0	0	0	0	0	0	0	0	0	0	0
249	111077	0.75	41.74	55.67	0.704	7.97	11.31	0.784	10.58	13.5	0.766	11.47	14.97	0.738	11.73	15.89	1.1567	42.5621	2	2	2	0	0	0	0	0	0	0	0	0	0	0	0	0	0	0	0	0	0	0	0	0	0	0	0	0	0	0	0
250	111078	0.838	47.17	56.29	0.823	10.8	13.12	0.901	11.89	13.19	0.861	11.85	13.76	0.779	12.63	16.22	1.1449	41.9633	2	2	2	0	0	0	0	0	0	0	0	0	0	0	0	0	0	0	0	0	0	0	0	0	0	0	0	0	0	0	0
251	111102	1.099	67.69	61.59	1.028	13.16	12.8	1.069	17.22	16.11	1.169	19	16.25	1.115	18.32	16.44	1.1396	38.327	2	1	2	0	1	0	0	0	0	0	0	0	0	0	0	10	1	0	0	0	0	0	0	0	0	0	0	0	0	0	0
252	111117	1.224	73.13	59.76	1.186	15.52	13.09	1.202	16.35	13.6	1.254	20.09	16.02	1.242	21.17	17.04	1.1325	42.819	2	1	2	0	3	0	0	0	0	0	0	0	0	0	0	8	1	0	22	1	0	31	1	0	0	0	0	0	0	0	0
253	111136	1.081	65.04	60.19	0.991	12.77	12.89	1.038	14.37	13.85	1.098	16.4	14.94	1.161	21.5	18.51	1.1554	43.9967	2	2	2	0	0	0	0	0	0	0	0	0	0	0	0	0	0	0	0	0	0	0	0	0	0	0	0	0	0	0	0
254	111173	0.947	60.15	63.55	0.904	12.58	13.93	0.968	13.77	14.22	0.965	16.68	17.29	0.945	17.12	18.11	1.1376	50.8248	2	2	2	0	0	0	0	0	0	0	0	0	0	0	0	0	0	0	0	0	0	0	0	0	0	0	0	0	0	0	0
255	111178	0.914	55.02	60.21	0.932	12.55	13.47	0.92	14.33	15.58	0.879	12.9	14.68	0.924	15.23	16.49	1.1529	44.0475	2	2	1	0	0	1	0	0	0	0	0	0	0	0	0	0	0	0	0	0	0	0	0	0	0	0	0	0	0	0	0
256	111192	0.912	62.88	68.98	0.896	13.94	15.56	0.917	15.65	17.06	0.968	18.17	18.76	0.859	15.12	17.6	1.1513	40.6348	2	2	2	0	0	0	0	0	0	0	0	0	0	0	0	0	0	0	0	0	0	0	0	0	0	0	0	0	0	0	0
257	111206	1.224	91.3	74.6	1.2	20.13	16.77	1.254	22.41	17.88	1.258	23.96	19.05	1.187	24.8	20.89	1.132	44.7954	2	2	2	0	0	0	0	0	0	0	0	0	0	0	0	0	0	0	0	0	0	0	0	0	0	0	0	0	0	0	0
258	111207	0.971	65.27	67.2	0.947	15.3	16.16	0.999	16.63	16.64	0.965	15.83	16.41	0.974	17.52	17.99	1.1527	42.8898	2	2	2	0	0	0	0	0	0	0	0	0	0	0	0	0	0	0	0	0	0	0	0	0	0	0	0	0	0	0	0
259	111215	1.015	70.95	69.93	0.96	15.19	15.82	0.927	11.89	12.82	1.044	20.06	19.23	1.079	23.81	22.06	1.1329	46.4706	2	2	2	0	0	0	0	0	0	0	0	0	0	0	0	0	0	0	0	0	0	0	0	0	0	0	0	0	0	0	0
260	111226	1.003	55.29	55.11	0.851	11.27	13.25	0.985	12.06	12.24	1.083	15.31	14.14	1.075	16.65	15.48	1.1361	46.8243	2	2	2	0	0	0	0	0	0	0	0	0	0	0	0	0	0	0	0	0	0	0	0	0	0	0	0	0	0	0	0
261	111232	1.048	53.17	50.74	1.049	11.54	11	1.059	12.29	11.61	1.018	13.96	13.72	1.067	15.39	14.42	1.155	44.1315	2	2	2	0	0	0	0	0	0	0	0	0	0	0	0	0	0	0	0	0	0	0	0	0	0	0	0	0	0	0	0
262	111240	1.201	81.46	67.84	1.179	16.67	14.14	1.191	20.09	16.87	1.225	22.05	17.99	1.203	22.65	18.83	1.1321	43.7068	2	2	2	0	0	0	0	0	0	0	0	0	0	0	0	0	0	0	0	0	0	0	0	0	0	0	0	0	0	0	0
263	111245	0.859	55.97	65.15	0.817	11.86	14.53	0.853	13.37	15.69	0.86	13.86	16.12	0.897	16.87	18.82	1.1458	41.0707	2	2	2	0	0	0	0	0	0	0	0	0	0	0	0	0	0	0	0	0	0	0	0	0	0	0	0	0	0	0	0
264	111246	1.294	81.63	63.08	1.271	19.19	15.09	1.298	19.16	14.76	1.309	20.53	15.69	1.297	22.75	17.54	1.1487	38.4393	2	2	2	0	0	0	0	0	0	0	0	0	0	0	0	0	0	0	0	0	0	0	0	0	0	0	0	0	0	0	0
265	111250	1.074	62.18	57.91	0.982	11.89	12.1	1.046	14.87	14.22	1.046	15.07	14.41	1.185	20.35	17.18	1.134	46.3806	2	1	2	0	1	0	0	0	0	0	0	0	0	0	0	40	1	0	0	0	0	0	0	0	0	0	0	0	0	0	0
266	111255	0.794	56.17	70.72	0.736	12.23	16.61	0.796	13.53	17	0.873	15.6	17.86	0.77	14.82	19.25	1.1465	43.4868	2	2	2	0	0	0	0	0	0	0	0	0	0	0	0	0	0	0	0	0	0	0	0	0	0	0	0	0	0	0	0
267	111256	1.1	60.27	54.81	0.963	11.49	11.93	1.069	13.57	12.7	1.162	16.39	14.1	1.171	18.83	16.08	1.1445	41.8449	2	2	2	0	0	0	0	0	0	0	0	0	0	0	0	0	0	0	0	0	0	0	0	0	0	0	0	0	0	0	0
268	111257	1.012	78.26	77.32	1.034	17.79	17.21	1.016	19.45	19.14	0.988	19.47	19.71	1.013	21.55	21.26	1.128	44.5414	2	2	2	0	0	0	0	0	0	0	0	0	0	0	0	0	0	0	0	0	0	0	0	0	0	0	0	0	0	0	0
269	111262	1.091	55.21	50.61	1.036	14.18	13.68	1.119	13.11	11.72	1.121	14.69	13.1	1.092	13.22	12.11	1.1239	41.61	2	1	2	0	2	0	0	0	0	0	0	0	0	0	0	61	2	1	66	2	1	0	0	0	0	0	0	0	0	0	0
270	111263	0.823	53.66	65.21	0.697	9.68	13.88	0.808	11.95	14.8	0.85	15.23	17.92	0.903	16.8	18.61	1.1517	41.9178	2	2	2	0	0	0	0	0	0	0	0	0	0	0	0	0	0	0	0	0	0	0	0	0	0	0	0	0	0	0	0
271	111282	0.949	49.54	52.18	0.917	10.96	11.95	1.003	12.82	12.78	0.981	12.39	12.63	0.903	13.38	14.82	1.1426	39.1427	2	2	2	0	0	0	0	0	0	0	0	0	0	0	0	0	0	0	0	0	0	0	0	0	0	0	0	0	0	0	0
272	111290	0.716	31.14	43.49	0.685	6.75	9.86	0.72	7.34	10.2	0.736	8.56	11.63	0.72	8.49	11.8	1.1424	48.8364	2	2	2	0	0	0	0	0	0	0	0	0	0	0	0	0	0	0	0	0	0	0	0	0	0	0	0	0	0	0	0
273	111299	0.948	57.15	60.31	0.841	10.77	12.81	0.907	12.53	13.81	0.966	15.99	16.56	1.043	17.86	17.13	1.1581	42.2545	2	2	2	0	0	0	0	0	0	0	0	0	0	0	0	0	0	0	0	0	0	0	0	0	0	0	0	0	0	0	0
274	111315	0.904	50.7	56.11	0.816	10.45	12.81	0.896	11.53	12.86	0.903	13.11	14.51	0.98	15.6	15.92	1.1309	47.0312	2	2	2	0	0	0	0	0	0	0	0	0	0	0	0	0	0	0	0	0	0	0	0	0	0	0	0	0	0	0	0
275	111322	0.885	49.02	55.4	0.816	9.97	12.22	0.809	10.33	12.78	0.96	13.62	14.2	0.932	15.09	16.2	1.1499	42.1982	2	2	2	0	0	0	0	0	0	0	0	0	0	0	0	0	0	0	0	0	0	0	0	0	0	0	0	0	0	0	0
276	111324	1.072	72.2	67.33	0.989	15.13	15.3	1.107	17.32	15.64	1.145	20.84	18.2	1.039	18.91	18.2	1.1298	43.8207	2	2	2	0	0	0	0	0	0	0	0	0	0	0	0	0	0	0	0	0	0	0	0	0	0	0	0	0	0	0	0
277	111326	1.148	70.24	61.16	1.046	14.37	13.74	1.155	16.33	14.14	1.156	18.78	16.25	1.219	20.76	17.03	1.1315	48.0077	2	2	2	0	0	0	0	0	0	0	0	0	0	0	0	0	0	0	0	0	0	0	0	0	0	0	0	0	0	0	0
278	111329	1.017	67.22	66.09	0.977	13.58	13.9	1.057	15.88	15.02	1.051	18	17.14	0.987	19.76	20.03	1.1319	40.1866	2	2	2	0	0	0	0	0	0	0	0	0	0	0	0	0	0	0	0	0	0	0	0	0	0	0	0	0	0	0	0
279	111332	0.912	57.59	63.12	0.856	12.22	14.28	0.878	12.32	14.02	0.932	15.2	16.32	0.965	17.86	18.5	1.1316	46.3995	2	2	2	0	0	0	0	0	0	0	0	0	0	0	0	0	0	0	0	0	0	0	0	0	0	0	0	0	0	0	0
280	111335	1.121	55.46	49.46	0.995	10.53	10.58	1.144	12.71	11.1	1.137	14.74	12.97	1.18	17.48	14.81	1.1353	46.937	2	2	2	0	0	0	0	0	0	0	0	0	0	0	0	0	0	0	0	0	0	0	0	0	0	0	0	0	0	0	0
281	111338	1.075	71.3	66.35	1.052	16.51	15.7	1.005	15.76	15.68	1.091	19.06	17.47	1.142	19.97	17.48	1.1393	42.9353	2	2	2	0	0	0	0	0	0	0	0	0	0	0	0	0	0	0	0	0	0	0	0	0	0	0	0	0	0	0	0
282	111343	1.041	52.88	50.81	1.02	11.02	10.81	1.017	11.65	11.45	1.055	14.08	13.35	1.061	16.13	15.21	1.1293	42.7035	2	2	2	0	0	0	0	0	0	0	0	0	0	0	0	0	0	0	0	0	0	0	0	0	0	0	0	0	0	0	0
283	111350	1.127	74.23	65.89	1.168	19.6	16.78	1.127	17.48	15.52	1.099	17.68	16.08	1.112	19.47	17.51	1.1502	40.0795	2	2	2	0	0	0	0	0	0	0	0	0	0	0	0	0	0	0	0	0	0	0	0	0	0	0	0	0	0	0	0
284	111352	0.919	41.71	45.37	0.824	9.05	10.98	0.913	11.88	13.01	0.973	11.7	12.03	0.972	9.09	9.35	1.1395	48.2427	2	2	2	0	0	0	0	0	0	0	0	0	0	0	0	0	0	0	0	0	0	0	0	0	0	0	0	0	0	0	0
285	111354	1.176	76.3	64.89	1.154	17.05	14.78	1.176	17.75	15.1	1.212	20.18	16.66	1.161	21.32	18.36	1.1455	38.5014	2	2	2	0	0	0	0	0	0	0	0	0	0	0	0	0	0	0	0	0	0	0	0	0	0	0	0	0	0	0	0
286	111355	0.881	40.58	46.05	0.803	8.46	10.54	0.792	8.97	11.33	0.948	11.3	11.92	0.966	11.85	12.27	1.1341	44.3934	2	2	2	0	0	0	0	0	0	0	0	0	0	0	0	0	0	0	0	0	0	0	0	0	0	0	0	0	0	0	0
287	111377	1.064	64.48	60.58	1.134	15.08	13.29	1.072	14.09	13.14	1.084	15.86	14.63	0.997	19.45	19.52	1.134	38.6779	2	2	2	0	0	0	0	0	0	0	0	0	0	0	0	0	0	0	0	0	0	0	0	0	0	0	0	0	0	0	0
288	111382	0.831	54.32	65.39	0.817	11.01	13.48	0.85	13.28	15.62	0.892	15.23	17.08	0.77	14.8	19.22	1.147	38.5338	2	2	2	0	0	0	0	0	0	0	0	0	0	0	0	0	0	0	0	0	0	0	0	0	0	0	0	0	0	0	0
289	111402	0.951	58.03	61.02	0.967	11.98	12.39	0.958	14.28	14.92	0.913	14.44	15.81	0.968	17.32	17.89	1.1448	49.5456	2	2	2	0	0	0	0	0	0	0	0	0	0	0	0	0	0	0	0	0	0	0	0	0	0	0	0	0	0	0	0
290	111411	0.923	52.09	56.41	0.873	9.88	11.32	0.863	10.76	12.46	0.933	14.91	15.99	0.994	16.54	16.64	1.1328	48.2274	2	2	1	0	0	1	0	0	0	0	0	0	0	0	0	0	0	0	0	0	0	0	0	0	0	0	0	0	0	0	0
291	111427	0.801	52.55	65.61	0.79	11.69	14.8	0.747	11.49	15.39	0.8	14.08	17.6	0.857	15.28	17.82	1.1298	45.1377	2	2	2	0	0	0	0	0	0	0	0	0	0	0	0	0	0	0	0	0	0	0	0	0	0	0	0	0	0	0	0
292	111433	0.864	48.07	55.63	0.876	11.44	13.06	0.85	10.46	12.3	0.872	12.86	14.74	0.858	13.32	15.53	1.1542	42.7681	2	2	2	0	0	0	0	0	0	0	0	0	0	0	0	0	0	0	0	0	0	0	0	0	0	0	0	0	0	0	0
293	111441	1.11	87.58	78.91	0.974	16.17	16.6	1.043	19.01	18.24	1.143	23.56	20.62	1.229	28.83	23.45	1.1535	42.95	2	1	2	0	1	0	0	0	0	0	0	0	0	0	0	15	1	0	0	0	0	0	0	0	0	0	0	0	0	0	0
294	111443	1.092	74.94	68.64	1.009	15.34	15.2	1.078	17.15	15.9	1.128	19.43	17.22	1.133	23.03	20.32	1.1523	39.9272	2	2	2	0	0	0	0	0	0	0	0	0	0	0	0	0	0	0	0	0	0	0	0	0	0	0	0	0	0	0	0
295	111448	0.907	60.62	66.81	0.845	12.45	14.74	0.907	15.4	16.98	0.96	16.24	16.92	0.91	16.53	18.17	1.1327	45.6751	2	2	2	0	0	0	0	0	0	0	0	0	0	0	0	0	0	0	0	0	0	0	0	0	0	0	0	0	0	0	0
296	111449	0.79	47.47	60.06	0.711	8.6	12.1	0.735	10.47	14.25	0.814	12.41	15.26	0.866	15.99	18.46	1.1262	42.5418	2	2	1	0	0	3	0	0	0	0	0	0	0	0	0	0	0	0	0	0	0	0	0	0	0	0	0	0	0	0	0
297	111452	0.743	43.09	57.99	0.649	8.72	13.44	0.725	9.53	13.15	0.784	11.74	14.97	0.798	13.1	16.43	1.1525	42.413	2	2	2	0	0	0	0	0	0	0	0	0	0	0	0	0	0	0	0	0	0	0	0	0	0	0	0	0	0	0	0
298	111459	0.984	79.87	81.2	1.027	17.53	17.08	0.995	18.72	18.81	0.941	20.34	21.62	0.983	23.28	23.69	1.1335	43.6088	2	2	2	0	0	0	0	0	0	0	0	0	0	0	0	0	0	0	0	0	0	0	0	0	0	0	0	0	0	0	0
299	111463	0.94	65.15	69.32	0.896	13.87	15.49	0.916	15	16.37	0.951	17.43	18.32	0.985	18.85	19.14	1.1359	43.1705	2	1	2	0	1	0	0	0	0	0	0	0	0	0	0	15	1	0	0	0	0	0	0	0	0	0	0	0	0	0	0
300	111494	0.963	58.15	60.38	0.893	11.14	12.48	0.958	12.05	12.58	1.059	16.54	15.62	0.935	18.41	19.7	1.1491	38.1136	2	1	2	0	1	0	0	0	0	0	0	0	0	0	0	42	1	0	0	0	0	0	0	0	0	0	0	0	0	0	0
301	111500	0.894	54.56	61.02	0.828	11.33	13.68	0.848	12.22	14.4	0.978	15.76	16.13	0.907	15.24	16.81	1.1469	41.8475	2	2	2	0	0	0	0	0	0	0	0	0	0	0	0	0	0	0	0	0	0	0	0	0	0	0	0	0	0	0	0
302	111501	1.2	66.88	55.72	1.071	18.73	17.49	1.196	21.36	17.86	1.315	26.79	20.37	1.94	41.76	21.53	1.1339	46.0629	2	2	2	0	0	0	0	0	0	0	0	0	0	0	0	0	0	0	0	0	0	0	0	0	0	0	0	0	0	0	0
303	111502	1.224	73.05	59.68	1.105	14.63	13.24	1.19	16.04	13.48	1.326	18.89	14.24	1.255	23.48	18.72	1.1348	42.1823	2	2	2	0	0	0	0	0	0	0	0	0	0	0	0	0	0	0	0	0	0	0	0	0	0	0	0	0	0	0	0
304	111507	0.823	47.19	57.32	0.761	8.67	11.39	0.825	10.65	12.9	0.886	14.22	16.06	0.805	13.65	16.96	1.1564	42.9067	2	2	2	0	0	0	0	0	0	0	0	0	0	0	0	0	0	0	0	0	0	0	0	0	0	0	0	0	0	0	0
305	111514	0.778	33.83	43.46	0.802	6.99	8.72	0.796	7.84	9.85	0.741	8.53	11.52	0.783	10.47	13.37	1.1385	45.5669	2	1	2	0	1	0	0	0	0	0	0	0	0	0	0	62	2	1	0	0	0	0	0	0	0	0	0	0	0	0	0
306	111516	1.022	71.16	69.64	0.932	13.8	14.81	1.045	19.71	18.87	1.042	17.86	17.14	1.051	19.79	18.82	1.1179	42.3143	2	2	2	0	0	0	0	0	0	0	0	0	0	0	0	0	0	0	0	0	0	0	0	0	0	0	0	0	0	0	0
307	111523	0.855	37.89	44.33	0.853	8.35	9.8	0.86	8.26	9.6	0.856	9.22	10.77	0.852	12.07	14.16	1.1562	41.6281	2	2	2	0	0	0	0	0	0	0	0	0	0	0	0	0	0	0	0	0	0	0	0	0	0	0	0	0	0	0	0
308	111525	1.007	61.49	61.05	0.943	11.94	12.67	1.039	15.47	14.89	1.06	16.8	15.85	0.98	17.28	17.64	1.1561	42.0167	2	2	2	0	0	0	0	0	0	0	0	0	0	0	0	0	0	0	0	0	0	0	0	0	0	0	0	0	0	0	0
309	111535	0.78	39.78	51.01	0.628	7.86	12.52	0.728	9.73	13.36	0.921	12.85	13.95	0.836	9.34	11.17	1.1343	45.2158	2	2	2	0	0	0	0	0	0	0	0	0	0	0	0	0	0	0	0	0	0	0	0	0	0	0	0	0	0	0	0
310	111550	1.04	30.67	29.49	1.064	16.26	15.28	1.014	14.41	14.21	1.378	19.75	14.33	1.332	20.34	15.27	1.1395	46.7181	2	2	2	0	0	0	0	0	0	0	0	0	0	0	0	0	0	0	0	0	0	0	0	0	0	0	0	0	0	0	0
311	111554	1.068	67.11	62.86	1.005	15.01	14.93	1.055	16.66	15.78	1.13	18	15.93	1.076	17.44	16.21	1.1439	40.2672	2	2	2	0	0	0	0	0	0	0	0	0	0	0	0	0	0	0	0	0	0	0	0	0	0	0	0	0	0	0	0
312	111560	1.079	65.53	60.72	1.04	11.38	10.95	1.02	14.97	14.68	1.097	18.07	16.48	1.134	21.12	18.62	1.1239	43.6206	2	2	2	0	0	0	0	0	0	0	0	0	0	0	0	0	0	0	0	0	0	0	0	0	0	0	0	0	0	0	0
313	111604	0.855	50.52	59.08	0.863	10.83	12.55	0.845	11.72	13.87	0.837	10.72	12.81	0.869	17.24	19.85	1.146	36.9683	2	2	2	0	0	0	0	0	0	0	0	0	0	0	0	0	0	0	0	0	0	0	0	0	0	0	0	0	0	0	0
314	111621	1.127	75.22	66.77	1.059	15.49	14.63	1.129	18.4	16.3	1.138	19.8	17.4	1.167	21.53	18.45	1.1462	41.5142	2	2	2	0	0	0	0	0	0	0	0	0	0	0	0	0	0	0	0	0	0	0	0	0	0	0	0	0	0	0	0
315	111632	1.05	61.73	58.79	0.995	13.47	13.54	1.073	15.17	14.14	1.087	15.87	14.61	1.043	17.21	16.5	1.1458	38.0518	2	2	2	0	0	0	0	0	0	0	0	0	0	0	0	0	0	0	0	0	0	0	0	0	0	0	0	0	0	0	0
316	111635	0.912	59.91	65.66	0.872	13.4	15.36	0.909	13.7	15.07	0.929	16.55	17.82	0.934	16.26	17.41	1.1304	44.805	2	2	2	0	0	0	0	0	0	0	0	0	0	0	0	0	0	0	0	0	0	0	0	0	0	0	0	0	0	0	0
317	111639	1.097	78.69	71.76	1.014	16.93	16.69	1.119	18.95	16.93	1.117	21.89	19.6	1.129	20.93	18.54	1.155	39.2966	2	2	2	0	0	0	0	0	0	0	0	0	0	0	0	0	0	0	0	0	0	0	0	0	0	0	0	0	0	0	0
318	111640	1.222	83.5	68.36	1.13	18.59	16.45	1.242	20.36	16.4	1.305	22.85	17.51	1.206	21.7	18	1.1239	44.0768	2	2	2	0	0	0	0	0	0	0	0	0	0	0	0	0	0	0	0	0	0	0	0	0	0	0	0	0	0	0	0
319	111643	1.106	81.59	73.77	0.948	17.66	18.62	1.166	20.49	17.58	1.158	20.55	17.74	1.154	22.89	19.83	1.1325	45.488	2	1	2	0	1	0	0	0	0	0	0	0	0	0	0	60	2	2	0	0	0	0	0	0	0	0	0	0	0	0	0
320	111656	0.886	48.18	54.35	0.801	9.34	11.67	0.891	10.85	12.18	0.923	13.57	14.71	0.913	14.41	15.79	1.1515	43.5509	2	2	2	0	0	0	0	0	0	0	0	0	0	0	0	0	0	0	0	0	0	0	0	0	0	0	0	0	0	0	0
321	111658	0.901	49.95	55.46	0.832	10.91	13.11	0.901	11.66	12.94	0.944	13.88	14.71	0.918	13.5	14.71	1.1467	43.3707	2	2	2	0	0	0	0	0	0	0	0	0	0	0	0	0	0	0	0	0	0	0	0	0	0	0	0	0	0	0	0
322	111668	1.186	81.72	68.91	1.106	16.42	14.84	1.196	20.76	17.35	1.214	21.14	17.41	1.212	23.4	19.3	1.1402	35.1106	2	2	2	0	0	0	0	0	0	0	0	0	0	0	0	0	0	0	0	0	0	0	0	0	0	0	0	0	0	0	0
323	111698	1.052	60.99	57.98	1.076	15.05	13.99	1.039	15.56	14.97	1.054	15.77	14.97	1.04	14.61	14.05	1.1366	42.5722	2	2	2	0	0	0	0	0	0	0	0	0	0	0	0	0	0	0	0	0	0	0	0	0	0	0	0	0	0	0	0
324	111704	0.926	48.92	52.81	0.91	11.25	12.36	0.974	11.74	12.06	0.971	12.9	13.28	0.863	13.03	15.1	1.1481	42.5721	2	2	2	0	0	0	0	0	0	0	0	0	0	0	0	0	0	0	0	0	0	0	0	0	0	0	0	0	0	0	0
325	111705	0.829	52.93	63.86	0.738	10.05	13.61	0.81	12.3	15.19	0.903	14.33	15.88	0.847	16.25	19.19	1.1406	48.8098	2	2	2	0	0	0	0	0	0	0	0	0	0	0	0	0	0	0	0	0	0	0	0	0	0	0	0	0	0	0	0
326	111712	0.995	69.09	69.44	0.909	15.62	17.19	0.975	16.14	16.56	1.032	17.47	16.93	1.059	19.86	18.75	1.1319	42.9026	2	1	1	0	2	1	0	0	0	0	0	0	0	0	0	25	1	0	40	1	0	0	0	0	0	0	0	0	0	0	0
327	111716	0.919	46.04	50.07	0.803	8.63	10.75	0.926	11.56	12.49	1.006	12.9	12.82	0.924	12.95	14.01	1.1558	44.3603	2	2	2	0	0	0	0	0	0	0	0	0	0	0	0	0	0	0	0	0	0	0	0	0	0	0	0	0	0	0	0
328	111717	0.916	47.33	51.69	0.866	9.7	11.21	0.913	11.03	12.09	0.941	13.61	14.46	0.932	12.98	13.94	1.1449	49.8819	2	2	2	0	0	0	0	0	0	0	0	0	0	0	0	0	0	0	0	0	0	0	0	0	0	0	0	0	0	0	0
329	111737	1.138	75.11	66.01	1.116	16.14	14.46	1.118	17.08	15.28	1.177	19.85	16.86	1.136	22.05	19.41	1.1268	43.5228	2	2	2	0	0	0	0	0	0	0	0	0	0	0	0	0	0	0	0	0	0	0	0	0	0	0	0	0	0	0	0
330	111741	0.748	41.91	56.06	0.671	8.79	13.11	0.686	8.94	13.04	0.798	11.07	13.89	0.818	13.11	16.03	1.1405	50.9817	2	2	2	0	0	0	0	0	0	0	0	0	0	0	0	0	0	0	0	0	0	0	0	0	0	0	0	0	0	0	0
331	111749	1.109	83.8	75.57	1.032	17.18	16.65	1.153	20.79	18.04	1.101	22.55	20.48	1.141	23.27	20.4	1.1454	38.3616	2	2	2	0	0	0	0	0	0	0	0	0	0	0	0	0	0	0	0	0	0	0	0	0	0	0	0	0	0	0	0
332	111751	1.016	47.56	46.79	0.992	10.62	10.71	1.066	12.99	12.18	1.049	12.58	11.99	0.955	11.38	11.92	1.1467	40.119	2	2	2	0	0	0	0	0	0	0	0	0	0	0	0	0	0	0	0	0	0	0	0	0	0	0	0	0	0	0	0
333	111754	0.832	44.6	53.63	0.785	8.98	11.44	0.84	11	13.09	0.857	12.18	14.22	0.836	12.44	14.89	1.1367	47.2374	2	2	2	0	0	0	0	0	0	0	0	0	0	0	0	0	0	0	0	0	0	0	0	0	0	0	0	0	0	0	0
334	111770	0.885	41.55	46.93	0.828	8.6	10.39	0.846	9.68	11.44	0.921	10.78	11.71	0.933	12.49	13.39	1.1334	42.7578	2	2	2	0	0	0	0	0	0	0	0	0	0	0	0	0	0	0	0	0	0	0	0	0	0	0	0	0	0	0	0
335	111779	1.11	57.38	51.71	1.053	12.62	11.99	1.087	13.92	12.81	1.161	15.4	13.26	1.131	15.43	13.65	1.1278	42.2073	2	2	2	0	0	0	0	0	0	0	0	0	0	0	0	0	0	0	0	0	0	0	0	0	0	0	0	0	0	0	0
336	111783	1.313	78.34	59.68	1.198	14.78	12.33	1.323	19.09	14.43	1.353	19.87	14.69	1.35	24.6	18.23	1.1338	45.276	1	2	2	1	0	0	68	2	9	0	0	0	0	0	0	0	0	0	0	0	0	0	0	0	0	0	0	0	0	0	0
337	111792	0.817	46.01	56.34	0.749	9.79	13.06	0.865	11.4	13.17	0.836	13.18	15.76	0.812	11.64	14.34	1.1378	49.1103	2	2	2	0	0	0	0	0	0	0	0	0	0	0	0	0	0	0	0	0	0	0	0	0	0	0	0	0	0	0	0
338	111795	1.082	68.64	63.44	0.968	13.67	14.12	1.131	17.2	15.21	1.111	18.83	16.95	1.104	18.94	17.16	1.1187	45.1405	2	2	2	0	0	0	0	0	0	0	0	0	0	0	0	0	0	0	0	0	0	0	0	0	0	0	0	0	0	0	0
339	111797	0.99	68.78	69.5	0.926	13.62	14.72	0.984	15.17	15.41	1.061	18.58	17.52	0.98	21.41	21.86	1.1454	41.9353	2	2	2	0	0	0	0	0	0	0	0	0	0	0	0	0	0	0	0	0	0	0	0	0	0	0	0	0	0	0	0
340	111799	1.088	60.04	55.17	1.045	12.45	11.92	1.065	12.87	12.08	1.108	11.43	10.32	1.117	23.29	20.85	1.1524	43.8099	2	2	2	0	0	0	0	0	0	0	0	0	0	0	0	0	0	0	0	0	0	0	0	0	0	0	0	0	0	0	0
341	111800	0.855	41.92	49.02	0.733	7.91	10.8	0.825	9.06	10.99	0.913	11.15	12.21	0.918	13.79	15.02	1.1566	47.3478	2	2	2	0	0	0	0	0	0	0	0	0	0	0	0	0	0	0	0	0	0	0	0	0	0	0	0	0	0	0	0
342	111804	0.995	52.8	53.07	0.937	10.76	11.49	0.929	11.63	12.52	1.067	15.19	14.23	1.027	15.23	14.83	1.1266	40.4747	2	2	2	0	0	0	0	0	0	0	0	0	0	0	0	0	0	0	0	0	0	0	0	0	0	0	0	0	0	0	0
343	111809	0.89	55.25	62.07	0.8	11.34	14.18	0.916	13.71	14.97	0.904	13.91	15.38	0.929	16.3	17.54	1.1383	47.7194	2	2	2	0	0	0	0	0	0	0	0	0	0	0	0	0	0	0	0	0	0	0	0	0	0	0	0	0	0	0	0
344	111821	1.001	52.69	52.62	0.93	11.28	12.13	1.044	13.05	12.51	1.064	14.37	13.51	0.967	13.99	14.48	1.1361	47.9796	2	2	2	0	0	0	0	0	0	0	0	0	0	0	0	0	0	0	0	0	0	0	0	0	0	0	0	0	0	0	0
345	111823	0.863	63.55	73.63	0.763	11.53	15.11	0.897	16.16	18.01	0.826	14.36	17.38	0.93	21.5	23.12	1.1299	46.0599	1	2	2	1	0	0	70	2	1	0	0	0	0	0	0	0	0	0	0	0	0	0	0	0	0	0	0	0	0	0	0
346	111824	1.338	92.33	69.02	1.21	18.14	15	1.325	20.27	15.3	1.406	25.6	18.21	1.381	28.32	20.51	1.1482	41.391	2	2	2	0	0	0	0	0	0	0	0	0	0	0	0	0	0	0	0	0	0	0	0	0	0	0	0	0	0	0	0
347	111835	0.864	68.31	79.02	0.789	13.73	17.41	0.814	15.24	18.73	0.89	17.82	20.03	0.942	21.52	22.85	1.1357	48.0233	2	2	2	0	0	0	0	0	0	0	0	0	0	0	0	0	0	0	0	0	0	0	0	0	0	0	0	0	0	0	0
348	111839	0.896	37.42	41.76	0.808	10.28	12.73	0.925	12.47	13.48	0.944	14.67	15.55	1.049	16.81	16.03	1.1368	51.0699	2	2	2	0	0	0	0	0	0	0	0	0	0	0	0	0	0	0	0	0	0	0	0	0	0	0	0	0	0	0	0
349	111840	0.853	54.88	64.32	0.771	10.39	13.48	0.846	13.35	15.78	0.87	15.66	18.01	0.907	15.47	17.06	1.1361	44.2355	2	2	2	0	0	0	0	0	0	0	0	0	0	0	0	0	0	0	0	0	0	0	0	0	0	0	0	0	0	0	0
350	111866	1.06	73.76	69.57	1.089	18.34	16.85	1.044	18.09	17.33	1.011	16.31	16.13	1.091	21.03	19.27	1.1456	39.8154	2	2	2	0	0	0	0	0	0	0	0	0	0	0	0	0	0	0	0	0	0	0	0	0	0	0	0	0	0	0	0
351	111870	0.961	45.64	47.5	0.782	7.21	9.22	0.895	9.77	10.92	1.028	13.41	13.05	1.066	15.25	14.31	1.1302	49.8136	2	2	2	0	0	0	0	0	0	0	0	0	0	0	0	0	0	0	0	0	0	0	0	0	0	0	0	0	0	0	0
352	111874	1.08	69.39	64.23	1.009	14.57	14.43	1.067	15.87	14.87	1.1	20.02	18.2	1.132	18.93	16.73	1.1358	44.2046	2	2	2	0	0	0	0	0	0	0	0	0	0	0	0	0	0	0	0	0	0	0	0	0	0	0	0	0	0	0	0
353	111875	0.94	56.19	59.79	0.862	10.82	12.55	0.945	13.26	14.03	0.996	15.67	15.73	0.941	16.44	17.48	1.1335	43.8791	1	2	2	1	0	0	16	1	0	0	0	0	0	0	0	0	0	0	0	0	0	0	0	0	0	0	0	0	0	0	0
354	111882	1.064	69.85	65.66	1.008	14.58	14.46	1.057	16.37	15.48	1.078	18.97	17.6	1.101	19.94	18.11	1.1289	49.6753	2	2	2	0	0	0	0	0	0	0	0	0	0	0	0	0	0	0	0	0	0	0	0	0	0	0	0	0	0	0	0
355	111886	0.843	51.22	60.79	0.78	10.99	14.09	0.808	12.22	15.11	0.938	14.49	15.45	0.838	13.53	16.14	1.1365	47.3851	2	2	2	0	0	0	0	0	0	0	0	0	0	0	0	0	0	0	0	0	0	0	0	0	0	0	0	0	0	0	0
356	111896	1.162	75.98	65.36	1.07	14.36	13.42	1.165	17.96	15.42	1.192	21.34	17.9	1.199	22.32	18.62	1.1275	43.6189	2	2	2	0	0	0	0	0	0	0	0	0	0	0	0	0	0	0	0	0	0	0	0	0	0	0	0	0	0	0	0
357	111901	1.295	93.47	72.16	1.229	19.13	15.57	1.329	22.11	16.64	1.295	26.37	20.37	1.321	25.86	19.58	1.1354	45.3306	2	2	2	0	0	0	0	0	0	0	0	0	0	0	0	0	0	0	0	0	0	0	0	0	0	0	0	0	0	0	0
358	111904	1.576	98.94	62.76	1.478	19.15	12.96	1.558	23.3	14.96	1.577	25.38	16.1	1.659	31.11	18.75	1.1387	43.5087	2	2	2	0	0	0	0	0	0	0	0	0	0	0	0	0	0	0	0	0	0	0	0	0	0	0	0	0	0	0	0
359	111908	0.994	54.2	54.53	0.963	12.07	12.53	1.038	14.93	14.39	1.025	13.81	13.47	0.948	13.4	14.14	1.13	47.1058	2	2	2	0	0	0	0	0	0	0	0	0	0	0	0	0	0	0	0	0	0	0	0	0	0	0	0	0	0	0	0
360	111927	1.01	55.23	54.66	0.99	11.94	12.06	1.01	12.95	12.82	1.028	14.53	14.13	1.01	15.81	15.65	1.1447	40.3474	2	2	2	0	0	0	0	0	0	0	0	0	0	0	0	0	0	0	0	0	0	0	0	0	0	0	0	0	0	0	0
361	111929	1.365	88.41	64.76	1.262	18.89	14.98	1.326	19.14	14.43	1.401	25.2	17.99	1.451	25.18	17.36	1.1412	39.7229	2	2	2	0	0	0	0	0	0	0	0	0	0	0	0	0	0	0	0	0	0	0	0	0	0	0	0	0	0	0	0
362	111938	1.033	60.08	58.15	0.998	13.14	13.16	1.07	14.71	13.75	1.044	15.08	14.44	1.02	17.14	16.8	1.1338	46.5345	2	2	2	0	0	0	0	0	0	0	0	0	0	0	0	0	0	0	0	0	0	0	0	0	0	0	0	0	0	0	0
363	111956	1.014	77.03	76	1.025	17.05	16.64	1.044	18.37	17.59	1.041	20.71	19.9	0.956	20.9	21.86	1.1322	48.755	2	2	2	0	0	0	0	0	0	0	0	0	0	0	0	0	0	0	0	0	0	0	0	0	0	0	0	0	0	0	0
364	111973	0.953	46.78	49.08	0.842	10.8	12.82	0.953	11.89	12.48	1.004	10.31	10.27	1.019	13.78	13.52	1.1386	43.1131	2	2	2	0	0	0	0	0	0	0	0	0	0	0	0	0	0	0	0	0	0	0	0	0	0	0	0	0	0	0	0
365	111994	1.09	77.89	71.43	1.057	18.95	17.92	1.084	17.36	16.01	1.114	19.7	17.68	1.104	21.87	19.82	1.1459	38.3013	2	2	2	0	0	0	0	0	0	0	0	0	0	0	0	0	0	0	0	0	0	0	0	0	0	0	0	0	0	0	0
366	111997	0.986	30	30.43	0.967	14.15	14.63	1.003	15.85	15.81	1.204	19.29	16.02	1.262	21.53	17.06	1.1227	46.9985	2	2	2	0	0	0	0	0	0	0	0	0	0	0	0	0	0	0	0	0	0	0	0	0	0	0	0	0	0	0	0
367	112001	1.084	78.68	72.59	0.938	14.48	15.44	1.035	17.58	16.98	1.131	21.28	18.81	1.186	25.34	21.37	1.141	38.1168	2	1	2	0	1	0	0	0	0	0	0	0	0	0	0	35	1	0	0	0	0	0	0	0	0	0	0	0	0	0	0
368	112005	1.106	74.21	67.07	1.026	15.42	15.02	1.103	18.3	16.59	1.186	19.68	16.6	1.104	20.81	18.86	1.133	39.8599	2	2	2	0	0	0	0	0	0	0	0	0	0	0	0	0	0	0	0	0	0	0	0	0	0	0	0	0	0	0	0
369	112008	1.042	68.08	65.35	0.946	13.4	14.18	1.022	15.93	15.59	1.086	18.14	16.7	1.091	20.6	18.88	1.1505	40.9093	2	2	2	0	0	0	0	0	0	0	0	0	0	0	0	0	0	0	0	0	0	0	0	0	0	0	0	0	0	0	0
370	112011	1.028	74.93	72.86	1.001	18.37	18.36	1.095	17.29	15.8	1.017	18.04	17.74	1.012	21.23	20.97	1.135	47.2676	2	2	2	0	0	0	0	0	0	0	0	0	0	0	0	0	0	0	0	0	0	0	0	0	0	0	0	0	0	0	0
371	112019	1.081	54.04	50	0.979	12.5	12.77	1.113	11.58	10.4	1.104	15.82	14.34	1.132	14.14	12.49	1.1334	47.0196	2	2	2	0	0	0	0	0	0	0	0	0	0	0	0	0	0	0	0	0	0	0	0	0	0	0	0	0	0	0	0
372	112028	1.03	63.19	61.36	0.958	13.03	13.6	0.983	13.85	14.09	1.074	18.17	16.92	1.083	18.13	16.74	1.1477	40.3401	2	1	1	0	3	1	0	0	0	0	0	0	0	0	0	8	1	0	10	1	0	12	1	0	0	0	0	0	0	0	0
373	112047	1.155	81.05	70.2	1.103	17.4	15.78	1.201	19.87	16.54	1.175	20.9	17.78	1.139	22.89	20.1	1.1282	40.7591	2	2	2	0	0	0	0	0	0	0	0	0	0	0	0	0	0	0	0	0	0	0	0	0	0	0	0	0	0	0	0
374	112071	0.629	37.73	59.96	0.58	8.29	14.28	0.659	9.64	14.63	0.628	9.27	14.74	0.647	10.54	16.3	1.1373	45.1178	2	2	2	0	0	0	0	0	0	0	0	0	0	0	0	0	0	0	0	0	0	0	0	0	0	0	0	0	0	0	0
375	112079	1.035	59.92	57.92	1.035	14.16	13.69	0.999	13.47	13.49	1.073	15.8	14.73	1.029	16.48	16.01	1.1442	42.2527	2	2	2	0	0	0	0	0	0	0	0	0	0	0	0	0	0	0	0	0	0	0	0	0	0	0	0	0	0	0	0
376	112099	0.915	50.21	54.88	0.851	10.66	12.54	0.926	12.67	13.68	0.99	14.32	14.47	0.884	12.56	14.2	1.1515	41.5294	2	2	2	0	0	0	0	0	0	0	0	0	0	0	0	0	0	0	0	0	0	0	0	0	0	0	0	0	0	0	0
377	112113	1.102	61.9	56.18	1.006	12.05	11.99	1.118	15.53	13.89	1.141	17.01	14.91	1.124	17.31	15.4	1.1388	45.0523	2	2	2	0	0	0	0	0	0	0	0	0	0	0	0	0	0	0	0	0	0	0	0	0	0	0	0	0	0	0	0
378	112117	0.835	51.3	61.41	0.831	11.23	13.52	0.81	11.41	14.08	0.789	12.2	15.46	0.897	16.46	18.36	1.1532	40.8688	2	2	2	0	0	0	0	0	0	0	0	0	0	0	0	0	0	0	0	0	0	0	0	0	0	0	0	0	0	0	0
379	112123	1.136	84.39	74.31	1.095	17.95	16.4	1.162	20.6	17.73	1.112	20.87	18.76	1.166	24.97	21.41	1.1362	39.8759	2	2	2	0	0	0	0	0	0	0	0	0	0	0	0	0	0	0	0	0	0	0	0	0	0	0	0	0	0	0	0
380	112124	0.84	43.14	51.33	0.909	13.54	14.89	0.829	10.04	12.12	0.8	10.96	13.69	0.808	8.59	10.63	1.1309	48.7283	2	2	2	0	0	0	0	0	0	0	0	0	0	0	0	0	0	0	0	0	0	0	0	0	0	0	0	0	0	0	0
381	112126	1.045	62.94	60.26	0.937	11.4	12.16	1.052	14.36	13.65	1.111	17.02	15.33	1.054	20.16	19.12	1.1293	41.6632	2	2	2	0	0	0	0	0	0	0	0	0	0	0	0	0	0	0	0	0	0	0	0	0	0	0	0	0	0	0	0
382	112127	1.206	68.33	56.65	1.173	15.06	12.84	1.23	16.06	13.06	1.252	18.72	14.95	1.171	18.49	15.79	1.1253	39.9521	2	2	2	0	0	0	0	0	0	0	0	0	0	0	0	0	0	0	0	0	0	0	0	0	0	0	0	0	0	0	0
383	112136	0.973	71.92	73.92	0.896	15.35	17.14	1	17.62	17.62	1.013	20.2	19.95	0.976	18.76	19.21	1.1314	44.9588	2	2	2	0	0	0	0	0	0	0	0	0	0	0	0	0	0	0	0	0	0	0	0	0	0	0	0	0	0	0	0
384	112137	0.845	40.8	48.27	0.789	7.52	9.53	0.833	10.26	12.32	0.892	11.15	12.51	0.853	11.86	13.91	1.1382	43.2891	2	2	2	0	0	0	0	0	0	0	0	0	0	0	0	0	0	0	0	0	0	0	0	0	0	0	0	0	0	0	0
385	112138	0.714	44.38	62.16	0.623	10.15	16.28	0.693	9.32	13.45	0.747	11.17	14.96	0.786	13.74	17.47	1.1417	40.5271	1	1	2	1	1	0	99999	2	2	0	0	0	0	0	0	70	2	2	0	0	0	0	0	0	0	0	0	0	0	0	0
386	112159	1.307	77.68	59.42	1.206	16.89	14.01	1.323	19.07	14.41	1.313	20.68	15.74	1.379	21.04	15.26	1.1294	44.7124	2	2	2	0	0	0	0	0	0	0	0	0	0	0	0	0	0	0	0	0	0	0	0	0	0	0	0	0	0	0	0
387	112170	1.034	60.95	58.94	0.912	12.45	13.65	1.035	14.75	14.25	1.089	16.93	15.54	1.085	16.82	15.5	1.125	49.2509	2	2	2	0	0	0	0	0	0	0	0	0	0	0	0	0	0	0	0	0	0	0	0	0	0	0	0	0	0	0	0
388	112171	0.744	37.71	50.66	0.566	6.2	10.95	0.672	7.99	11.9	0.809	10.19	12.59	0.876	13.34	15.22	1.1554	44.6675	2	2	2	0	0	0	0	0	0	0	0	0	0	0	0	0	0	0	0	0	0	0	0	0	0	0	0	0	0	0	0
389	112180	0.581	30.96	53.26	0.571	7	12.24	0.542	7.09	13.09	0.631	9.03	14.3	0.576	7.85	13.63	1.1352	51.3186	1	2	1	2	0	1	62	2	2	64	2	3	0	0	0	0	0	0	0	0	0	0	0	0	0	0	0	0	0	0	0
390	112186	0.969	53.72	55.44	1.006	11.31	11.25	0.976	12.78	13.1	0.957	14.85	15.51	0.949	14.78	15.58	1.146	40.1465	2	2	2	0	0	0	0	0	0	0	0	0	0	0	0	0	0	0	0	0	0	0	0	0	0	0	0	0	0	0	0
391	112187	1.195	65.15	54.54	1.018	12.3	12.08	1.154	15.17	13.14	1.284	17.46	13.6	1.287	20.23	15.72	1.1528	41.7057	2	2	2	0	0	0	0	0	0	0	0	0	0	0	0	0	0	0	0	0	0	0	0	0	0	0	0	0	0	0	0
392	112193	0.89	65.51	73.62	0.829	12.06	14.56	0.875	15.19	17.35	0.977	19.84	20.3	0.86	18.43	21.42	1.1547	43.7558	2	2	2	0	0	0	0	0	0	0	0	0	0	0	0	0	0	0	0	0	0	0	0	0	0	0	0	0	0	0	0
393	112194	0.888	56.98	64.19	0.837	11.46	13.69	0.942	15.36	16.31	0.923	16.48	17.86	0.837	13.67	16.32	1.1291	48.5634	2	1	2	0	1	0	0	0	0	0	0	0	0	0	0	16	1	0	0	0	0	0	0	0	0	0	0	0	0	0	0
394	112195	0.932	46.23	49.59	0.903	9.59	10.62	0.936	10.7	11.42	0.936	12.19	13.02	0.947	13.76	14.53	1.1348	41.2569	2	2	2	0	0	0	0	0	0	0	0	0	0	0	0	0	0	0	0	0	0	0	0	0	0	0	0	0	0	0	0
395	112207	1.066	53.88	50.52	0.911	9.71	10.65	1.026	12.11	11.81	1.128	15.07	13.36	1.155	16.98	14.7	1.1552	42.8957	2	2	2	0	0	0	0	0	0	0	0	0	0	0	0	0	0	0	0	0	0	0	0	0	0	0	0	0	0	0	0
396	112210	1.433	128.31	89.54	1.421	27.19	19.14	1.523	32.46	21.32	1.455	33.65	23.13	1.35	35.02	25.95	1.1314	45.6287	2	2	2	0	0	0	0	0	0	0	0	0	0	0	0	0	0	0	0	0	0	0	0	0	0	0	0	0	0	0	0
397	112215	0.949	62.94	66.31	0.882	12.09	13.71	0.914	13.39	14.65	0.99	17.98	18.16	0.985	19.48	19.78	1.144	43.4814	2	2	2	0	0	0	0	0	0	0	0	0	0	0	0	0	0	0	0	0	0	0	0	0	0	0	0	0	0	0	0
398	112221	0.893	44.42	49.74	0.87	9.22	10.59	0.892	10	11.22	0.928	12.5	13.46	0.878	12.7	14.46	1.1362	46.1314	2	2	2	0	0	0	0	0	0	0	0	0	0	0	0	0	0	0	0	0	0	0	0	0	0	0	0	0	0	0	0
399	112226	0.985	68.38	69.45	0.91	13.77	15.12	0.949	15.81	16.67	0.999	19	19.03	1.063	19.8	18.62	1.1328	45.9969	2	2	2	0	0	0	0	0	0	0	0	0	0	0	0	0	0	0	0	0	0	0	0	0	0	0	0	0	0	0	0
400	112233	1.209	75.78	62.7	1.152	17.75	15.41	1.233	18.55	15.04	1.264	20.52	16.24	1.185	18.97	16.01	1.1425	42.8438	2	2	2	0	0	0	0	0	0	0	0	0	0	0	0	0	0	0	0	0	0	0	0	0	0	0	0	0	0	0	0
401	112237	0.802	37.34	46.57	0.703	7.23	10.29	0.728	7.65	10.51	0.83	10.18	12.26	0.909	12.28	13.51	1.141	50.7059	2	2	2	0	0	0	0	0	0	0	0	0	0	0	0	0	0	0	0	0	0	0	0	0	0	0	0	0	0	0	0
402	112238	1.012	58.36	57.66	0.969	12.07	12.46	1.018	14.11	13.86	1.011	14.86	14.7	1.041	17.32	16.64	1.1571	43.7481	2	2	2	0	0	0	0	0	0	0	0	0	0	0	0	0	0	0	0	0	0	0	0	0	0	0	0	0	0	0	0
403	112243	0.937	49.24	52.57	0.847	9.91	11.7	0.919	10.98	11.95	0.965	12.68	13.14	0.993	15.67	15.78	1.1309	49.9419	2	1	2	0	1	0	0	0	0	0	0	0	0	0	0	45	1	0	0	0	0	0	0	0	0	0	0	0	0	0	0
404	112265	0.913	55.44	60.69	0.876	13.1	14.96	0.905	12.26	13.55	0.966	15.35	15.88	0.904	14.72	16.3	1.1326	44.7862	2	2	2	0	0	0	0	0	0	0	0	0	0	0	0	0	0	0	0	0	0	0	0	0	0	0	0	0	0	0	0
405	112270	0.767	49.42	64.41	0.761	10.37	13.62	0.819	12.28	14.99	0.813	13.11	16.14	0.695	13.66	19.66	1.1482	42.0975	2	2	2	0	0	0	0	0	0	0	0	0	0	0	0	0	0	0	0	0	0	0	0	0	0	0	0	0	0	0	0
406	112276	1.068	55.33	51.8	0.931	11.01	11.83	1.072	11.8	11.01	1.085	13.74	12.67	1.153	18.78	16.29	1.1465	41.0881	2	2	2	0	0	0	0	0	0	0	0	0	0	0	0	0	0	0	0	0	0	0	0	0	0	0	0	0	0	0	0
407	112280	0.734	37.16	50.67	0.68	7.52	11.06	0.682	8.09	11.87	0.747	9.68	12.97	0.803	11.87	14.77	1.1357	45.1318	2	2	2	0	0	0	0	0	0	0	0	0	0	0	0	0	0	0	0	0	0	0	0	0	0	0	0	0	0	0	0
408	112291	1.292	47.43	36.7	1.249	23.34	18.7	1.338	24.09	18	1.495	27.25	18.23	1.606	30.85	19.21	1.1366	45.5687	2	2	2	0	0	0	0	0	0	0	0	0	0	0	0	0	0	0	0	0	0	0	0	0	0	0	0	0	0	0	0
409	112299	0.991	57.65	58.15	0.999	13.22	13.23	1.012	14.49	14.32	1.002	15.46	15.44	0.955	14.47	15.15	1.1578	44.3686	2	2	2	0	0	0	0	0	0	0	0	0	0	0	0	0	0	0	0	0	0	0	0	0	0	0	0	0	0	0	0
410	112303	1.07	57.37	53.61	1.006	11.24	11.17	1.047	15.84	15.13	1.125	15.61	13.87	1.093	14.69	13.43	1.1518	40.6636	2	2	2	0	0	0	0	0	0	0	0	0	0	0	0	0	0	0	0	0	0	0	0	0	0	0	0	0	0	0	0
411	112314	1.083	53.26	49.19	1.046	11.48	10.98	1.134	13.7	12.08	1.138	14.49	12.73	1.014	13.58	13.4	1.1408	42.0262	2	2	2	0	0	0	0	0	0	0	0	0	0	0	0	0	0	0	0	0	0	0	0	0	0	0	0	0	0	0	0
412	112315	1.042	56.25	53.99	1.012	12.6	12.46	1.02	12.23	11.99	1.062	14.83	13.96	1.065	16.59	15.58	1.1288	42.0055	2	2	2	0	0	0	0	0	0	0	0	0	0	0	0	0	0	0	0	0	0	0	0	0	0	0	0	0	0	0	0
413	112327	1.01	75.36	74.63	0.895	14.71	16.44	0.985	16.87	17.12	1.083	21.91	20.24	1.05	21.88	20.83	1.1406	39.6335	2	2	2	0	0	0	0	0	0	0	0	0	0	0	0	0	0	0	0	0	0	0	0	0	0	0	0	0	0	0	0
414	112331	1.013	72.46	71.53	1.046	16.16	15.46	1.001	17.44	17.42	0.964	17.77	18.43	1.043	21.09	20.22	1.1289	44.1109	2	2	2	0	0	0	0	0	0	0	0	0	0	0	0	0	0	0	0	0	0	0	0	0	0	0	0	0	0	0	0
415	112335	0.904	48.85	54.07	0.857	10.28	12	0.864	11.7	13.54	0.91	13.17	14.48	0.975	13.71	14.05	1.1429	46.393	2	2	2	0	0	0	0	0	0	0	0	0	0	0	0	0	0	0	0	0	0	0	0	0	0	0	0	0	0	0	0
416	112344	0.97	56.62	58.39	0.854	11.74	13.74	0.984	14.01	14.24	1.017	15.04	14.79	1.014	15.83	15.61	1.1489	43.3208	2	2	2	0	0	0	0	0	0	0	0	0	0	0	0	0	0	0	0	0	0	0	0	0	0	0	0	0	0	0	0
417	112345	0.835	60.09	71.96	0.795	12.36	15.54	0.879	14.89	16.93	0.806	14.87	18.45	0.854	17.98	21.04	1.1353	42.9872	2	1	2	0	1	0	0	0	0	0	0	0	0	0	0	24	1	0	0	0	0	0	0	0	0	0	0	0	0	0	0
418	112347	0.959	59.33	61.84	0.855	11.75	13.74	0.958	14.49	15.13	1.001	16.58	16.57	1.007	16.51	16.4	1.1563	42.5716	2	2	2	0	0	0	0	0	0	0	0	0	0	0	0	0	0	0	0	0	0	0	0	0	0	0	0	0	0	0	0
419	112361	1.266	80.64	63.72	1.217	17.59	14.46	1.301	20.82	16.01	1.24	18.85	15.2	1.296	23.38	18.04	1.1546	41.4957	2	2	2	0	0	0	0	0	0	0	0	0	0	0	0	0	0	0	0	0	0	0	0	0	0	0	0	0	0	0	0
420	112363	1.059	62.22	58.74	1.025	13.38	13.06	1.058	14.03	13.25	1.114	17.51	15.71	1.035	17.31	16.72	1.1515	43.1017	2	2	2	0	0	0	0	0	0	0	0	0	0	0	0	0	0	0	0	0	0	0	0	0	0	0	0	0	0	0	0
421	112365	0.758	39.17	51.65	0.729	8.1	11.11	0.766	9.03	11.8	0.765	10.27	13.42	0.768	11.76	15.31	1.1525	43.4023	2	2	2	0	0	0	0	0	0	0	0	0	0	0	0	0	0	0	0	0	0	0	0	0	0	0	0	0	0	0	0
422	112375	1.101	57.04	51.83	1.009	11.58	11.47	1.063	12.32	11.59	1.143	14.85	12.99	1.16	18.29	15.77	1.1477	41.7933	2	2	2	0	0	0	0	0	0	0	0	0	0	0	0	0	0	0	0	0	0	0	0	0	0	0	0	0	0	0	0
423	112387	1.033	60.75	58.83	0.979	12.94	13.21	1.01	14.7	14.55	1.067	15.57	14.59	1.066	17.55	16.47	1.1267	42.9619	2	2	2	0	0	0	0	0	0	0	0	0	0	0	0	0	0	0	0	0	0	0	0	0	0	0	0	0	0	0	0
424	112399	0.638	31.58	49.53	0.554	6.1	11.02	0.549	6.57	11.97	0.661	8.21	12.41	0.758	10.71	14.13	1.1539	44.0747	2	2	2	0	0	0	0	0	0	0	0	0	0	0	0	0	0	0	0	0	0	0	0	0	0	0	0	0	0	0	0
425	112410	1.154	66.64	57.73	1.036	12.51	12.08	1.159	15.54	13.41	1.177	16.64	14.14	1.212	21.94	18.11	1.1295	44.7358	2	2	2	0	0	0	0	0	0	0	0	0	0	0	0	0	0	0	0	0	0	0	0	0	0	0	0	0	0	0	0
426	112422	1.485	75.32	50.71	1.434	16.15	11.26	1.492	18.35	12.3	1.535	19.37	12.62	1.476	21.45	14.53	1.137	38.0794	2	2	2	0	0	0	0	0	0	0	0	0	0	0	0	0	0	0	0	0	0	0	0	0	0	0	0	0	0	0	0
427	112426	0.861	46.22	53.69	0.853	10.34	12.13	0.866	10.8	12.47	0.853	11.73	13.76	0.871	13.35	15.33	1.1346	45.3003	2	2	2	0	0	0	0	0	0	0	0	0	0	0	0	0	0	0	0	0	0	0	0	0	0	0	0	0	0	0	0
428	112427	0.993	63.55	64	0.947	13.57	14.33	0.966	14.63	15.15	0.98	17.1	17.45	1.07	18.25	17.06	1.1484	44.0182	2	2	2	0	0	0	0	0	0	0	0	0	0	0	0	0	0	0	0	0	0	0	0	0	0	0	0	0	0	0	0
429	112437	0.745	31.88	42.8	0.688	6.71	9.76	0.69	7.37	10.69	0.753	8.95	11.88	0.846	8.86	10.47	1.1421	49.3912	2	2	2	0	0	0	0	0	0	0	0	0	0	0	0	0	0	0	0	0	0	0	0	0	0	0	0	0	0	0	0
430	112444	0.9	50.36	55.93	0.815	9.87	12.12	0.895	12.12	13.54	0.947	14.25	15.05	0.928	14.12	15.22	1.1413	39.7463	2	1	2	0	1	0	0	0	0	0	0	0	0	0	0	8	1	0	0	0	0	0	0	0	0	0	0	0	0	0	0
431	112446	1.353	94.96	70.21	1.294	20.91	16.15	1.307	21.73	16.62	1.378	25.05	18.18	1.416	27.28	19.26	1.1507	43.285	2	2	2	0	0	0	0	0	0	0	0	0	0	0	0	0	0	0	0	0	0	0	0	0	0	0	0	0	0	0	0
432	112450	0.997	54.9	55.04	0.972	11.22	11.54	1.024	12.82	12.52	0.972	13.86	14.26	1.017	17	16.73	1.1458	38.3514	2	2	2	0	0	0	0	0	0	0	0	0	0	0	0	0	0	0	0	0	0	0	0	0	0	0	0	0	0	0	0
433	112452	1.001	54.46	54.38	0.961	11.33	11.79	1.002	12.24	12.21	0.99	13.8	13.94	1.04	17.09	16.44	1.1368	45.1305	2	2	2	0	0	0	0	0	0	0	0	0	0	0	0	0	0	0	0	0	0	0	0	0	0	0	0	0	0	0	0
434	112464	0.856	39.12	45.71	0.765	7.75	10.13	0.782	8.98	11.49	0.919	10.63	11.57	0.939	11.76	12.52	1.1463	41.3673	2	2	2	0	0	0	0	0	0	0	0	0	0	0	0	0	0	0	0	0	0	0	0	0	0	0	0	0	0	0	0
435	112467	1.294	93.16	71.98	1.229	19.8	16.12	1.246	19.32	15.5	1.349	28.9	21.42	1.327	25.14	18.94	1.1485	41.4389	2	2	2	0	0	0	0	0	0	0	0	0	0	0	0	0	0	0	0	0	0	0	0	0	0	0	0	0	0	0	0
436	112471	0.849	50.4	59.36	0.878	11.07	12.6	0.816	10.51	12.88	0.895	13.59	15.18	0.815	15.24	18.7	1.1522	41.377	2	2	2	0	0	0	0	0	0	0	0	0	0	0	0	0	0	0	0	0	0	0	0	0	0	0	0	0	0	0	0
437	112483	0.981	64.76	66.03	0.945	13.46	14.24	0.992	16.92	17.06	0.992	16.93	17.07	0.988	17.45	17.66	1.1364	45.2459	2	1	2	0	1	0	0	0	0	0	0	0	0	0	0	12	1	0	0	0	0	0	0	0	0	0	0	0	0	0	0
438	112488	1.118	72.68	65	1.085	16.14	14.88	1.098	17.31	15.77	1.096	17.06	15.57	1.18	22.17	18.78	1.1465	37.3316	2	2	2	0	0	0	0	0	0	0	0	0	0	0	0	0	0	0	0	0	0	0	0	0	0	0	0	0	0	0	0
439	112499	0.951	59.34	62.41	0.934	13.18	14.11	0.966	14.33	14.84	0.983	16.4	16.69	0.921	15.44	16.77	1.1542	44.1959	2	2	2	0	0	0	0	0	0	0	0	0	0	0	0	0	0	0	0	0	0	0	0	0	0	0	0	0	0	0	0
440	112501	1.079	55.38	51.31	1.104	12.32	11.15	1.068	12.95	12.13	1.087	14.83	13.63	1.063	15.29	14.39	1.1309	41.156	2	2	1	0	0	1	0	0	0	0	0	0	0	0	0	0	0	0	0	0	0	0	0	0	0	0	0	0	0	0	0
441	112510	1.222	67.26	55.03	1.108	15.07	13.6	1.182	16.14	13.66	1.34	16.73	12.49	1.264	19.32	15.29	1.1281	41.3935	2	2	2	0	0	0	0	0	0	0	0	0	0	0	0	0	0	0	0	0	0	0	0	0	0	0	0	0	0	0	0
442	112514	1.024	68.76	67.16	0.947	14.49	15.29	0.967	15.83	16.37	1.073	18.2	16.97	1.092	20.24	18.53	1.1367	49.0662	2	2	2	0	0	0	0	0	0	0	0	0	0	0	0	0	0	0	0	0	0	0	0	0	0	0	0	0	0	0	0
443	112515	1.126	61.77	54.84	1.096	13.76	12.56	1.157	14.44	12.48	1.164	20.47	17.59	1.073	13.1	12.21	1.1547	43.4836	2	2	2	0	0	0	0	0	0	0	0	0	0	0	0	0	0	0	0	0	0	0	0	0	0	0	0	0	0	0	0
444	112531	0.842	47.13	55.94	0.738	8.52	11.54	0.769	10.23	13.31	0.919	14.21	15.46	0.906	14.17	15.63	1.1398	49.4365	2	2	2	0	0	0	0	0	0	0	0	0	0	0	0	0	0	0	0	0	0	0	0	0	0	0	0	0	0	0	0
445	112532	1.075	60.99	56.75	1.04	12.53	12.05	1.054	16.86	15.99	1.07	15.43	14.42	1.132	16.17	14.29	1.1321	45.7925	2	2	2	0	0	0	0	0	0	0	0	0	0	0	0	0	0	0	0	0	0	0	0	0	0	0	0	0	0	0	0
446	112535	1.325	92.61	69.92	1.292	18.93	14.66	1.331	22.85	17.17	1.302	24.86	19.09	1.367	25.98	19.01	1.126	42.221	2	2	2	0	0	0	0	0	0	0	0	0	0	0	0	0	0	0	0	0	0	0	0	0	0	0	0	0	0	0	0
447	112542	0.963	54.26	56.33	0.932	11.18	12	0.984	13.78	14.01	1.037	14.09	13.59	0.909	15.21	16.73	1.146	39.4167	2	2	2	0	0	0	0	0	0	0	0	0	0	0	0	0	0	0	0	0	0	0	0	0	0	0	0	0	0	0	0
448	112543	1.108	69.99	63.15	1.014	14.25	14.05	1.123	16.62	14.8	1.118	17.07	15.27	1.159	22.05	19.03	1.1318	42.9139	2	2	2	0	0	0	0	0	0	0	0	0	0	0	0	0	0	0	0	0	0	0	0	0	0	0	0	0	0	0	0
449	112565	0.822	36.76	44.7	0.749	7.22	9.63	0.852	8.33	9.78	0.83	10.01	12.06	0.847	11.2	13.22	1.1274	42.8789	2	2	2	0	0	0	0	0	0	0	0	0	0	0	0	0	0	0	0	0	0	0	0	0	0	0	0	0	0	0	0
450	112568	0.964	55.41	57.48	0.881	11.71	13.29	0.921	12.6	13.68	1.008	15.08	14.96	1.03	16.02	15.55	1.1473	43.0004	2	2	2	0	0	0	0	0	0	0	0	0	0	0	0	0	0	0	0	0	0	0	0	0	0	0	0	0	0	0	0
451	112580	1.046	58.36	55.78	0.992	13.98	14.09	1.082	14.91	13.78	1.069	15.74	14.73	1.041	13.73	13.18	1.1293	47.5877	2	2	2	0	0	0	0	0	0	0	0	0	0	0	0	0	0	0	0	0	0	0	0	0	0	0	0	0	0	0	0
452	112583	0.851	50.92	59.86	0.789	10.13	12.84	0.779	10.31	13.23	0.939	16.04	17.09	0.865	14.44	16.7	1.1528	41.1466	2	2	2	0	0	0	0	0	0	0	0	0	0	0	0	0	0	0	0	0	0	0	0	0	0	0	0	0	0	0	0
453	112584	0.889	46	51.72	0.872	10.26	11.76	0.89	11.6	13.04	0.871	11.3	12.97	0.921	12.84	13.95	1.1507	44.2928	2	2	2	0	0	0	0	0	0	0	0	0	0	0	0	0	0	0	0	0	0	0	0	0	0	0	0	0	0	0	0
454	112589	1.107	81.61	73.74	1.031	17.79	17.25	1.073	19.07	17.78	1.141	22.99	20.15	1.172	21.75	18.56	1.1438	37.9161	2	2	2	0	0	0	0	0	0	0	0	0	0	0	0	0	0	0	0	0	0	0	0	0	0	0	0	0	0	0	0
455	112596	0.8	43	53.75	0.711	8.25	11.61	0.777	10.53	13.55	0.802	11.29	14.08	0.89	12.93	14.52	1.1564	42.3897	2	2	2	0	0	0	0	0	0	0	0	0	0	0	0	0	0	0	0	0	0	0	0	0	0	0	0	0	0	0	0
456	112620	0.937	43.38	46.3	0.874	9.57	10.95	0.918	9.84	10.73	0.942	11	11.68	1.001	12.97	12.95	1.1353	39.7929	2	2	2	0	0	0	0	0	0	0	0	0	0	0	0	0	0	0	0	0	0	0	0	0	0	0	0	0	0	0	0
457	112621	0.782	48.2	61.64	0.75	10.27	13.69	0.796	11.17	14.03	0.766	12.27	16.01	0.809	14.49	17.91	1.1492	41.3286	2	2	2	0	0	0	0	0	0	0	0	0	0	0	0	0	0	0	0	0	0	0	0	0	0	0	0	0	0	0	0
458	112639	0.98	54.99	56.14	0.974	13.28	13.63	1.005	13.63	13.57	1.032	14.88	14.41	0.909	13.2	14.53	1.1445	41.5417	2	2	1	0	0	1	0	0	0	0	0	0	0	0	0	0	0	0	0	0	0	0	0	0	0	0	0	0	0	0	0
459	112644	0.98	66.25	67.62	0.843	13.97	16.58	0.929	14.85	15.98	1.02	17.94	17.59	1.117	19.49	17.46	1.1328	46.0643	2	1	1	0	1	1	0	0	0	0	0	0	0	0	0	71	2	3	0	0	0	0	0	0	0	0	0	0	0	0	0
460	112646	1.015	70.75	69.7	0.945	15.52	16.43	1.003	17.37	17.32	1.047	19.45	18.59	1.06	18.41	17.37	1.1497	42.3944	2	2	2	0	0	0	0	0	0	0	0	0	0	0	0	0	0	0	0	0	0	0	0	0	0	0	0	0	0	0	0
461	112665	0.968	63.94	66.06	0.894	13.22	14.79	0.974	16.98	17.44	0.981	16.39	16.7	1.013	17.35	17.13	1.1543	42.7319	2	2	2	0	0	0	0	0	0	0	0	0	0	0	0	0	0	0	0	0	0	0	0	0	0	0	0	0	0	0	0
462	112667	1.051	80.04	76.16	1.021	16.72	16.37	1.04	18.84	18.12	1.07	20.84	19.48	1.065	23.64	22.2	1.1409	42.1892	2	2	2	0	0	0	0	0	0	0	0	0	0	0	0	0	0	0	0	0	0	0	0	0	0	0	0	0	0	0	0
463	112680	0.989	66.04	66.74	0.912	14.54	15.94	1.005	14.87	14.8	1.067	17.61	16.51	0.976	19.01	19.49	1.1413	40.4132	2	2	2	0	0	0	0	0	0	0	0	0	0	0	0	0	0	0	0	0	0	0	0	0	0	0	0	0	0	0	0
464	112687	1.104	58.78	53.25	1.035	13.15	12.71	1.093	12.75	11.67	1.123	15.39	13.71	1.153	17.49	15.17	1.1233	40.1562	1	2	2	2	0	0	32	1	0	34	1	0	0	0	0	0	0	0	0	0	0	0	0	0	0	0	0	0	0	0	0
465	112692	1.101	72.65	65.99	1.064	15.89	14.94	1.097	16.83	15.35	1.128	19.15	16.97	1.109	20.77	18.72	1.126	42.868	2	2	2	0	0	0	0	0	0	0	0	0	0	0	0	0	0	0	0	0	0	0	0	0	0	0	0	0	0	0	0
466	112700	1.074	62.98	58.65	0.994	13.01	13.08	1.046	14.11	13.49	1.151	18.72	16.26	1.084	17.15	15.82	1.1371	46.5436	2	2	2	0	0	0	0	0	0	0	0	0	0	0	0	0	0	0	0	0	0	0	0	0	0	0	0	0	0	0	0
467	112703	1.274	85.01	66.75	1.268	18.12	14.29	1.281	20.84	16.27	1.279	21.47	16.79	1.267	24.58	19.39	1.1347	45.471	2	2	2	0	0	0	0	0	0	0	0	0	0	0	0	0	0	0	0	0	0	0	0	0	0	0	0	0	0	0	0
468	112707	1.346	91.37	67.9	1.303	19.93	15.29	1.435	21.86	15.23	1.353	24.99	18.47	1.301	24.59	18.9	1.1513	41.1965	2	2	2	0	0	0	0	0	0	0	0	0	0	0	0	0	0	0	0	0	0	0	0	0	0	0	0	0	0	0	0
469	112712	0.977	66.25	67.82	0.922	13.44	14.58	0.967	16.06	16.62	0.966	16.4	16.99	1.037	20.35	19.63	1.1428	40.0335	2	2	2	0	0	0	0	0	0	0	0	0	0	0	0	0	0	0	0	0	0	0	0	0	0	0	0	0	0	0	0
470	112718	1.283	67.69	52.76	1.232	17.83	14.48	1.315	24.78	18.85	1.514	27.67	18.28	1.29	25.08	19.44	1.1411	40.6774	2	2	2	0	0	0	0	0	0	0	0	0	0	0	0	0	0	0	0	0	0	0	0	0	0	0	0	0	0	0	0
471	112725	0.902	49.23	54.56	0.796	10.54	13.23	0.865	10.19	11.79	0.945	13.98	14.8	0.985	14.52	14.74	1.1376	48.127	2	2	2	0	0	0	0	0	0	0	0	0	0	0	0	0	0	0	0	0	0	0	0	0	0	0	0	0	0	0	0
472	112731	0.876	53.3	60.83	0.844	11.16	13.23	0.859	12.21	14.21	0.913	15.09	16.53	0.88	14.84	16.87	1.1462	40.9101	2	2	2	0	0	0	0	0	0	0	0	0	0	0	0	0	0	0	0	0	0	0	0	0	0	0	0	0	0	0	0
473	112739	0.945	41.47	43.86	0.959	11.87	12.37	0.932	13.71	14.71	0.947	15.89	16.79	1.031	20.41	19.8	1.1377	45.8819	2	2	2	0	0	0	0	0	0	0	0	0	0	0	0	0	0	0	0	0	0	0	0	0	0	0	0	0	0	0	0
474	112749	0.953	50.79	53.28	0.925	10.1	10.92	0.923	11.23	12.16	0.955	13.48	14.11	0.994	15.99	16.09	1.1375	35.8207	2	1	2	0	1	0	0	0	0	0	0	0	0	0	0	53	2	2	0	0	0	0	0	0	0	0	0	0	0	0	0
475	112767	0.987	60.89	61.71	0.899	12.31	13.69	0.92	13.08	14.21	1.012	15.54	15.36	1.082	19.96	18.45	1.1352	46.7538	2	2	2	0	0	0	0	0	0	0	0	0	0	0	0	0	0	0	0	0	0	0	0	0	0	0	0	0	0	0	0
476	112781	1.092	65.38	59.87	0.988	12.82	12.98	1.037	15.3	14.76	1.172	17.88	15.26	1.149	19.38	16.87	1.1314	48.2842	1	1	2	1	1	0	29	1	0	0	0	0	0	0	0	80	2	1	0	0	0	0	0	0	0	0	0	0	0	0	0
477	112783	1.145	82.39	71.96	1.114	16.26	14.6	1.227	21.34	17.39	1.181	23.17	19.63	1.063	21.61	20.34	1.1424	39.8348	2	2	2	0	0	0	0	0	0	0	0	0	0	0	0	0	0	0	0	0	0	0	0	0	0	0	0	0	0	0	0
478	112802	1.319	90.84	68.86	1.273	19.54	15.35	1.329	22.89	17.23	1.382	26.06	18.86	1.283	22.35	17.42	1.1328	41.6922	2	1	2	0	1	0	0	0	0	0	0	0	0	0	0	15	1	0	0	0	0	0	0	0	0	0	0	0	0	0	0
479	112818	0.878	45.98	52.35	0.801	8.95	11.18	0.837	10.29	12.31	0.919	12.96	14.09	0.932	13.77	14.77	1.143	44.2794	2	2	2	0	0	0	0	0	0	0	0	0	0	0	0	0	0	0	0	0	0	0	0	0	0	0	0	0	0	0	0
480	112828	0.833	51.57	61.91	0.862	12	13.92	0.801	11.84	14.78	0.814	13.6	16.71	0.856	14.13	16.51	1.123	47.9083	2	2	2	0	0	0	0	0	0	0	0	0	0	0	0	0	0	0	0	0	0	0	0	0	0	0	0	0	0	0	0
481	112840	1.016	42.45	41.78	0.938	8.96	9.55	1.006	11.06	11	1.037	10.95	10.56	1.076	11.47	10.66	1.137	46.8868	2	2	2	0	0	0	0	0	0	0	0	0	0	0	0	0	0	0	0	0	0	0	0	0	0	0	0	0	0	0	0
482	112850	1.007	68.32	67.82	0.931	15	16.11	1.039	17.65	16.99	1.007	17.59	17.47	1.048	18.08	17.25	1.1331	45.9878	2	2	2	0	0	0	0	0	0	0	0	0	0	0	0	0	0	0	0	0	0	0	0	0	0	0	0	0	0	0	0
483	112852	1.006	60.69	60.33	0.919	12.89	14.02	0.976	12.66	12.97	1.098	17.05	15.53	1.016	18.09	17.81	1.1327	46.186	2	2	2	0	0	0	0	0	0	0	0	0	0	0	0	0	0	0	0	0	0	0	0	0	0	0	0	0	0	0	0
484	112865	0.885	51.68	58.4	0.807	10.38	12.85	0.932	12.78	13.72	0.893	13.35	14.95	0.899	15.17	16.88	1.1495	43.0217	2	2	2	0	0	0	0	0	0	0	0	0	0	0	0	0	0	0	0	0	0	0	0	0	0	0	0	0	0	0	0
485	112874	0.755	44.24	58.62	0.701	9.58	13.67	0.733	10.96	14.96	0.788	11.63	14.75	0.792	12.07	15.24	1.1431	36.4547	2	2	2	0	0	0	0	0	0	0	0	0	0	0	0	0	0	0	0	0	0	0	0	0	0	0	0	0	0	0	0
486	112897	0.829	41.54	50.12	0.824	8.48	10.29	0.8	9.58	11.98	0.831	11.08	13.33	0.854	12.4	14.52	1.1512	43.2207	2	2	2	0	0	0	0	0	0	0	0	0	0	0	0	0	0	0	0	0	0	0	0	0	0	0	0	0	0	0	0
487	112927	0.994	50.72	51.01	0.934	10.23	10.95	1.041	11.81	11.34	0.982	12.42	12.66	1.012	16.26	16.07	1.1441	40.6974	2	2	2	0	0	0	0	0	0	0	0	0	0	0	0	0	0	0	0	0	0	0	0	0	0	0	0	0	0	0	0
488	112930	1.313	107.41	81.81	1.258	23.43	18.62	1.264	26.88	21.27	1.345	28.45	21.15	1.38	28.65	20.76	1.1258	44.0895	2	2	2	0	0	0	0	0	0	0	0	0	0	0	0	0	0	0	0	0	0	0	0	0	0	0	0	0	0	0	0
489	112939	0.785	43.41	55.29	0.776	9.72	12.52	0.76	10.3	13.55	0.802	12.12	15.11	0.799	11.27	14.1	1.1471	40.265	2	2	2	0	0	0	0	0	0	0	0	0	0	0	0	0	0	0	0	0	0	0	0	0	0	0	0	0	0	0	0
490	112944	0.953	56.36	59.11	0.985	12.66	12.85	0.892	11.41	12.8	0.931	16.06	17.25	1.001	16.23	16.21	1.1415	37.6667	2	2	2	0	0	0	0	0	0	0	0	0	0	0	0	0	0	0	0	0	0	0	0	0	0	0	0	0	0	0	0
491	112947	0.8	37.17	46.47	0.741	7.64	10.31	0.812	9.18	11.31	0.801	9.74	12.15	0.836	10.61	12.7	1.1478	43.9282	1	2	2	1	0	0	80	2	1	0	0	0	0	0	0	0	0	0	0	0	0	0	0	0	0	0	0	0	0	0	0
492	112951	1.164	76.3	65.56	1.074	15.42	14.35	1.109	16.06	14.49	1.207	20.5	16.98	1.232	24.33	19.74	1.1295	40.3055	2	2	2	0	0	0	0	0	0	0	0	0	0	0	0	0	0	0	0	0	0	0	0	0	0	0	0	0	0	0	0
493	112953	0.82	58.93	71.84	0.858	14.44	16.82	0.912	16.54	18.13	0.818	14.86	18.16	0.7	13.1	18.72	1.132	48.1289	2	2	2	0	0	0	0	0	0	0	0	0	0	0	0	0	0	0	0	0	0	0	0	0	0	0	0	0	0	0	0
494	112955	1.04	56.18	54.01	1.015	11.1	10.94	1.029	13.38	13.01	1.055	15.27	14.48	1.054	16.42	15.58	1.1383	45.625	2	2	2	0	0	0	0	0	0	0	0	0	0	0	0	0	0	0	0	0	0	0	0	0	0	0	0	0	0	0	0
495	112957	0.92	49.91	54.24	0.873	10.68	12.22	0.938	11.61	12.38	0.906	12.44	13.74	0.955	15.18	15.89	1.129	44.1965	2	2	2	0	0	0	0	0	0	0	0	0	0	0	0	0	0	0	0	0	0	0	0	0	0	0	0	0	0	0	0
496	112968	0.74	30.16	40.77	0.68	8.29	12.18	0.804	10.25	12.75	0.896	12.31	13.73	0.734	11.63	15.84	1.1529	45.3532	2	2	2	0	0	0	0	0	0	0	0	0	0	0	0	0	0	0	0	0	0	0	0	0	0	0	0	0	0	0	0
497	112988	0.953	64.39	67.58	0.914	15.12	16.54	0.931	14.91	16.02	0.956	15.88	16.61	1.004	18.47	18.4	1.1338	43.1474	2	1	2	0	1	0	0	0	0	0	0	0	0	0	0	16	1	0	0	0	0	0	0	0	0	0	0	0	0	0	0
498	112990	0.873	55.42	63.51	0.869	13.29	15.3	0.893	13.08	14.65	0.872	13.66	15.67	0.86	15.38	17.89	1.1237	49.3384	2	2	2	0	0	0	0	0	0	0	0	0	0	0	0	0	0	0	0	0	0	0	0	0	0	0	0	0	0	0	0
499	112995	1.373	90.21	65.72	1.245	21.36	17.15	1.38	24.17	17.52	1.502	22.59	15.04	1.38	22.1	16.02	1.1271	44.0966	2	2	2	0	0	0	0	0	0	0	0	0	0	0	0	0	0	0	0	0	0	0	0	0	0	0	0	0	0	0	0
500	113000	1.294	101.88	78.76	1.158	20.32	17.55	1.235	22.02	17.82	1.322	26.61	20.13	1.416	32.93	23.25	1.1277	43.2542	2	2	2	0	0	0	0	0	0	0	0	0	0	0	0	0	0	0	0	0	0	0	0	0	0	0	0	0	0	0	0
501	113001	0.774	46.45	60	0.743	9.92	13.35	0.806	10.63	13.19	0.751	11.54	15.38	0.794	14.37	18.09	1.1338	47.1707	2	2	2	0	0	0	0	0	0	0	0	0	0	0	0	0	0	0	0	0	0	0	0	0	0	0	0	0	0	0	0
502	113010	1.025	72.67	70.89	0.902	13.6	15.07	0.994	16.71	16.81	1.117	21.27	19.05	1.057	21.08	19.95	1.1318	40.5208	2	2	2	0	0	0	0	0	0	0	0	0	0	0	0	0	0	0	0	0	0	0	0	0	0	0	0	0	0	0	0
503	113011	1.239	80.44	64.94	1.147	16	13.96	1.243	22.17	17.83	1.255	21.49	17.12	1.296	20.79	16.04	1.1325	41.8537	2	1	2	0	2	0	0	0	0	0	0	0	0	0	0	7	1	0	20	1	0	0	0	0	0	0	0	0	0	0	0
504	113013	1.08	56.01	51.85	1.052	12.39	11.78	1.12	13.65	12.19	1.138	16.37	14.39	1.008	13.6	13.5	1.1317	42.1325	2	2	2	0	0	0	0	0	0	0	0	0	0	0	0	0	0	0	0	0	0	0	0	0	0	0	0	0	0	0	0
505	113037	1.082	65.44	60.5	0.994	13.4	13.48	1.134	16.48	14.54	1.12	17.45	15.58	1.071	18.1	16.91	1.1456	39.6435	2	2	2	0	0	0	0	0	0	0	0	0	0	0	0	0	0	0	0	0	0	0	0	0	0	0	0	0	0	0	0
506	113038	0.888	54.93	61.87	0.834	12.36	14.82	0.918	14.14	15.41	0.874	13.76	15.74	0.923	14.66	15.9	1.1279	46.6923	2	2	2	0	0	0	0	0	0	0	0	0	0	0	0	0	0	0	0	0	0	0	0	0	0	0	0	0	0	0	0
507	113049	0.94	48.44	51.52	0.841	9.61	11.43	0.961	12.31	12.81	0.947	12.59	13.3	0.997	13.93	13.98	1.1554	42.445	2	2	2	0	0	0	0	0	0	0	0	0	0	0	0	0	0	0	0	0	0	0	0	0	0	0	0	0	0	0	0
508	113063	0.79	42.84	54.2	0.765	8.96	11.71	0.802	10.46	13.04	0.79	11.27	14.26	0.8	12.15	15.19	1.1563	45.1222	2	2	2	0	0	0	0	0	0	0	0	0	0	0	0	0	0	0	0	0	0	0	0	0	0	0	0	0	0	0	0
509	113073	1.324	83.01	62.68	1.295	18.2	14.05	1.314	21.72	16.53	1.31	21.53	16.44	1.377	21.56	15.66	1.1334	44.6903	2	2	2	0	0	0	0	0	0	0	0	0	0	0	0	0	0	0	0	0	0	0	0	0	0	0	0	0	0	0	0
510	113109	1.021	54.13	53.03	1.044	11.92	11.41	1.041	12.35	11.87	1.05	13.77	13.12	0.967	16.08	16.62	1.1338	43.843	2	2	2	0	0	0	0	0	0	0	0	0	0	0	0	0	0	0	0	0	0	0	0	0	0	0	0	0	0	0	0
511	113118	0.99	58.7	59.32	0.979	14.59	14.91	1.044	16.06	15.39	0.997	15.61	15.66	0.931	12.44	13.36	1.1255	47.8575	2	1	2	0	1	0	0	0	0	0	0	0	0	0	0	10	1	0	0	0	0	0	0	0	0	0	0	0	0	0	0
512	113122	1.019	58.38	57.27	0.943	11.59	12.3	1.031	15.64	15.16	1.073	16.76	15.62	1.014	14.39	14.19	1.151	41.3006	2	2	2	0	0	0	0	0	0	0	0	0	0	0	0	0	0	0	0	0	0	0	0	0	0	0	0	0	0	0	0
513	113129	0.979	70.47	72	0.902	13.87	15.39	0.933	17.18	18.41	1.044	18.56	17.78	1.021	20.86	20.42	1.1439	41.6048	2	2	2	0	0	0	0	0	0	0	0	0	0	0	0	0	0	0	0	0	0	0	0	0	0	0	0	0	0	0	0
514	113131	0.937	46.12	49.21	0.856	9	10.51	0.946	10.67	11.28	0.94	12.24	13.02	0.988	14.22	14.39	1.1334	43.6314	2	2	2	0	0	0	0	0	0	0	0	0	0	0	0	0	0	0	0	0	0	0	0	0	0	0	0	0	0	0	0
515	113136	1.114	64.41	57.82	1.125	14.09	12.52	1.087	15.07	13.87	1.185	17.19	14.5	1.067	18.06	16.93	1.1387	37	2	2	2	0	0	0	0	0	0	0	0	0	0	0	0	0	0	0	0	0	0	0	0	0	0	0	0	0	0	0	0
516	113152	1.133	74.87	66.06	1.08	17.02	15.76	1.188	18.23	15.34	1.167	19.33	16.56	1.103	20.3	18.4	1.136	46.2917	2	2	2	0	0	0	0	0	0	0	0	0	0	0	0	0	0	0	0	0	0	0	0	0	0	0	0	0	0	0	0
517	113155	1.212	43.75	36.08	1.106	13.46	12.18	1.219	14.57	11.95	1.315	15.72	11.95	1.425	16.88	11.84	1.1244	44.0856	2	2	2	0	0	0	0	0	0	0	0	0	0	0	0	0	0	0	0	0	0	0	0	0	0	0	0	0	0	0	0
518	113175	0.783	57.08	72.95	0.745	11.71	15.71	0.729	11.62	15.95	0.804	14.65	18.22	0.828	19.1	23.07	1.1495	42.1185	2	2	1	0	0	1	0	0	0	0	0	0	0	0	0	0	0	0	0	0	0	0	0	0	0	0	0	0	0	0	0
519	113179	0.981	53.78	54.84	0.958	12.74	13.3	1.017	12.87	12.66	0.992	13.26	13.36	0.961	14.91	15.51	1.139	47.9337	2	1	2	0	1	0	0	0	0	0	0	0	0	0	0	10	1	0	0	0	0	0	0	0	0	0	0	0	0	0	0
520	113189	1.032	68.16	66.07	0.98	14.83	15.13	1.059	17.75	16.77	1.053	17.54	16.65	1.03	18.04	17.52	1.1304	40.7993	2	2	2	0	0	0	0	0	0	0	0	0	0	0	0	0	0	0	0	0	0	0	0	0	0	0	0	0	0	0	0
521	113201	1.082	63.99	59.13	1.03	14.38	13.96	1.075	15.24	14.18	1.166	17.12	14.69	1.058	17.25	16.3	1.131	48.811	2	2	2	0	0	0	0	0	0	0	0	0	0	0	0	0	0	0	0	0	0	0	0	0	0	0	0	0	0	0	0
522	113207	0.987	47.99	48.63	1.028	11.43	11.11	1.034	9.59	9.28	1.015	13.12	12.93	0.904	13.84	15.31	1.1462	40.1027	1	2	1	1	0	1	22	1	0	0	0	0	0	0	0	0	0	0	0	0	0	0	0	0	0	0	0	0	0	0	0
523	113209	0.804	43.61	54.27	0.805	9.56	11.87	0.792	9.77	12.34	0.833	11.66	14	0.786	12.62	16.05	1.1377	46.8038	2	2	2	0	0	0	0	0	0	0	0	0	0	0	0	0	0	0	0	0	0	0	0	0	0	0	0	0	0	0	0
524	113222	0.929	51.72	55.66	0.825	10.06	12.2	0.943	11.17	11.84	0.915	12.56	13.73	1.002	17.93	17.88	1.1322	44.438	2	2	2	0	0	0	0	0	0	0	0	0	0	0	0	0	0	0	0	0	0	0	0	0	0	0	0	0	0	0	0
525	113223	0.996	61.34	61.6	0.906	12.43	13.72	0.957	14.32	14.96	1.037	18.12	17.48	1.067	16.47	15.44	1.1342	45.798	2	2	2	0	0	0	0	0	0	0	0	0	0	0	0	0	0	0	0	0	0	0	0	0	0	0	0	0	0	0	0
526	113224	1.222	88.65	72.55	1.143	19.87	17.38	1.211	21.3	17.6	1.234	23.12	18.74	1.293	24.35	18.84	1.1468	41.8173	2	2	2	0	0	0	0	0	0	0	0	0	0	0	0	0	0	0	0	0	0	0	0	0	0	0	0	0	0	0	0
527	113231	1.165	69.48	59.66	1.034	12.52	12.11	1.125	18.09	16.08	1.241	18.73	15.09	1.23	20.14	16.38	1.1539	41.4497	2	2	2	0	0	0	0	0	0	0	0	0	0	0	0	0	0	0	0	0	0	0	0	0	0	0	0	0	0	0	0
528	113237	1.231	77.88	63.27	1.227	17.22	14.03	1.166	16.15	13.85	1.256	19.53	15.55	1.26	24.98	19.84	1.1278	39.3315	2	2	2	0	0	0	0	0	0	0	0	0	0	0	0	0	0	0	0	0	0	0	0	0	0	0	0	0	0	0	0
529	113240	0.898	47.01	52.34	0.863	9.51	11.02	0.858	10.04	11.69	0.92	13.22	14.37	0.934	14.25	15.25	1.1365	44.4224	2	2	2	0	0	0	0	0	0	0	0	0	0	0	0	0	0	0	0	0	0	0	0	0	0	0	0	0	0	0	0
530	113244	1.084	60.02	55.38	0.974	11.81	12.12	1.132	15.03	13.27	1.134	16.29	14.36	1.082	16.89	15.62	1.1513	40.9685	2	2	2	0	0	0	0	0	0	0	0	0	0	0	0	0	0	0	0	0	0	0	0	0	0	0	0	0	0	0	0
531	113246	0.897	50.36	56.14	0.853	11.11	13.02	0.895	11.69	13.06	0.962	13.5	14.04	0.878	14.06	16.01	1.1303	45.3459	2	2	2	0	0	0	0	0	0	0	0	0	0	0	0	0	0	0	0	0	0	0	0	0	0	0	0	0	0	0	0
532	113256	1.128	71.88	63.7	1.039	13.64	13.13	1.079	16.66	15.44	1.133	18.94	16.71	1.23	22.65	18.42	1.1296	44.0471	2	1	2	0	1	0	0	0	0	0	0	0	0	0	0	8	1	0	0	0	0	0	0	0	0	0	0	0	0	0	0
533	113258	1.011	70.99	70.24	0.993	17.13	17.26	1.019	15.67	15.37	1.015	17.76	17.5	1.015	20.42	20.11	1.1282	42.2544	2	2	2	0	0	0	0	0	0	0	0	0	0	0	0	0	0	0	0	0	0	0	0	0	0	0	0	0	0	0	0
534	113276	0.815	39.15	48.01	0.758	8.39	11.07	0.812	9.76	12.02	0.849	10.42	12.27	0.837	10.58	12.65	1.1547	43.9152	2	2	2	0	0	0	0	0	0	0	0	0	0	0	0	0	0	0	0	0	0	0	0	0	0	0	0	0	0	0	0
535	113281	0.976	59.7	61.18	0.94	12.73	13.54	1.009	14.94	14.81	0.955	14.86	15.56	0.994	17.17	17.27	1.1371	38.8157	2	2	2	0	0	0	0	0	0	0	0	0	0	0	0	0	0	0	0	0	0	0	0	0	0	0	0	0	0	0	0
536	113286	1.035	65.01	62.79	0.88	12.47	14.17	1.001	14.89	14.88	1.115	18.23	16.35	1.117	19.43	17.38	1.1406	40.6387	2	2	2	0	0	0	0	0	0	0	0	0	0	0	0	0	0	0	0	0	0	0	0	0	0	0	0	0	0	0	0
537	113287	1.022	64.76	63.38	0.923	12.25	13.27	0.992	14.49	14.61	1.041	15.59	14.97	1.093	22.44	20.52	1.1312	43.5991	2	1	2	0	3	0	0	0	0	0	0	0	0	0	0	17	1	0	17	1	0	25	1	0	0	0	0	0	0	0	0
538	113292	1.013	65.38	64.52	0.97	15.02	15.49	0.987	14.79	14.98	1	17.04	17.03	1.089	18.54	17.02	1.1565	38.0752	2	2	2	0	0	0	0	0	0	0	0	0	0	0	0	0	0	0	0	0	0	0	0	0	0	0	0	0	0	0	0
539	113298	0.937	48.11	51.35	0.901	9.14	10.14	0.893	10.72	12	0.96	12.14	12.65	0.973	16.11	16.55	1.1306	42.2548	2	2	2	0	0	0	0	0	0	0	0	0	0	0	0	0	0	0	0	0	0	0	0	0	0	0	0	0	0	0	0
540	113301	0.845	30.57	36.19	0.802	8.42	10.49	0.863	9.81	11.37	0.862	12.34	14.32	0.976	12.9	13.21	1.1203	43.5852	2	2	2	0	0	0	0	0	0	0	0	0	0	0	0	0	0	0	0	0	0	0	0	0	0	0	0	0	0	0	0
541	113308	1.433	104.7	73.08	1.356	20.01	14.76	1.402	25.05	17.87	1.455	28.08	19.29	1.492	31.57	21.16	1.1237	43.1861	2	2	2	0	0	0	0	0	0	0	0	0	0	0	0	0	0	0	0	0	0	0	0	0	0	0	0	0	0	0	0
542	113320	0.879	51.98	59.15	0.776	10.84	13.96	0.798	10.82	13.57	0.921	14.3	15.52	0.995	16.02	16.1	1.1387	49.3333	2	2	2	0	0	0	0	0	0	0	0	0	0	0	0	0	0	0	0	0	0	0	0	0	0	0	0	0	0	0	0
543	113324	1.001	66.58	66.48	0.936	13.6	14.52	1.021	15.85	15.52	1.048	17.75	16.94	0.994	19.38	19.5	1.1285	46.2858	2	2	2	0	0	0	0	0	0	0	0	0	0	0	0	0	0	0	0	0	0	0	0	0	0	0	0	0	0	0	0
544	113326	1.012	49.57	49	0.992	11.29	11.38	1.013	11.76	11.61	1.001	12.18	12.17	1.036	14.34	13.84	1.1325	43.0578	2	2	2	0	0	0	0	0	0	0	0	0	0	0	0	0	0	0	0	0	0	0	0	0	0	0	0	0	0	0	0
545	113340	0.819	46.94	57.3	0.698	8.5	12.18	0.773	9.48	12.26	0.923	13.6	14.74	0.848	15.36	18.12	1.1399	51.1875	2	2	2	0	0	0	0	0	0	0	0	0	0	0	0	0	0	0	0	0	0	0	0	0	0	0	0	0	0	0	0
546	113341	0.766	39.84	52.02	0.718	8.57	11.93	0.739	9.37	12.69	0.749	9.26	12.37	0.841	12.64	15.03	1.1354	47.7939	2	2	2	0	0	0	0	0	0	0	0	0	0	0	0	0	0	0	0	0	0	0	0	0	0	0	0	0	0	0	0
547	113343	0.924	37.13	40.18	0.784	8.07	10.3	0.898	6.76	7.52	0.973	10.98	11.29	1.023	11.32	11.07	1.1299	46.846	2	2	2	0	0	0	0	0	0	0	0	0	0	0	0	0	0	0	0	0	0	0	0	0	0	0	0	0	0	0	0
548	113355	1.33	37.06	27.86	1.47	15.17	10.32	1.456	16.06	11.03	1.336	16.59	12.41	1.325	20.47	15.45	1.1536	41.8862	2	2	2	0	0	0	0	0	0	0	0	0	0	0	0	0	0	0	0	0	0	0	0	0	0	0	0	0	0	0	0
549	113357	0.89	47.84	53.75	0.893	12.15	13.61	0.862	10.74	12.46	0.858	11.65	13.57	0.942	13.3	14.12	1.1342	48.3352	2	2	2	0	0	0	0	0	0	0	0	0	0	0	0	0	0	0	0	0	0	0	0	0	0	0	0	0	0	0	0
550	113362	0.87	57.7	66.29	0.781	11.58	14.83	0.834	13.35	16.01	0.936	16.09	17.2	0.914	16.68	18.26	1.1445	42.0946	2	2	2	0	0	0	0	0	0	0	0	0	0	0	0	0	0	0	0	0	0	0	0	0	0	0	0	0	0	0	0
551	113367	1.174	78.08	66.5	1.194	18.21	15.26	1.181	19.14	16.21	1.138	20.02	17.59	1.187	20.7	17.43	1.1216	44.6703	2	2	2	0	0	0	0	0	0	0	0	0	0	0	0	0	0	0	0	0	0	0	0	0	0	0	0	0	0	0	0
552	113376	0.935	57.53	61.51	0.946	12.21	12.91	0.951	14.2	14.94	0.899	15.05	16.73	0.949	16.07	16.94	1.1388	46.8631	2	2	2	0	0	0	0	0	0	0	0	0	0	0	0	0	0	0	0	0	0	0	0	0	0	0	0	0	0	0	0
553	113385	1.153	82.19	71.27	1.079	18.49	17.15	1.139	19.89	17.46	1.142	20.68	18.11	1.246	23.12	18.55	1.1312	43.2662	1	2	2	1	0	0	56	2	3	0	0	0	0	0	0	0	0	0	0	0	0	0	0	0	0	0	0	0	0	0	0
554	113397	0.819	36.26	44.3	0.871	9.49	10.9	0.811	8.59	10.59	0.79	9.78	12.38	0.806	8.4	10.43	1.1388	47.4601	2	2	2	0	0	0	0	0	0	0	0	0	0	0	0	0	0	0	0	0	0	0	0	0	0	0	0	0	0	0	0
555	113404	1.134	69.13	60.98	1.087	15.7	14.45	1.045	15.89	15.21	1.163	17.54	15.08	1.231	20	16.25	1.1311	41.5954	2	2	2	0	0	0	0	0	0	0	0	0	0	0	0	0	0	0	0	0	0	0	0	0	0	0	0	0	0	0	0
556	113405	1.029	57.51	55.89	0.944	11.46	12.14	1.001	13.33	13.31	1.085	16.13	14.86	1.066	16.59	15.57	1.1321	42.4596	2	2	2	0	0	0	0	0	0	0	0	0	0	0	0	0	0	0	0	0	0	0	0	0	0	0	0	0	0	0	0
557	113407	0.998	50.36	50.48	0.971	10.96	11.29	0.906	10.38	11.45	1.017	13.32	13.1	1.072	15.7	14.64	1.1465	39.5694	2	2	2	0	0	0	0	0	0	0	0	0	0	0	0	0	0	0	0	0	0	0	0	0	0	0	0	0	0	0	0
558	113425	0.997	67.36	67.6	0.978	14.48	14.8	0.984	15.71	15.96	1.024	19.12	18.66	0.994	18.06	18.17	1.1302	45.0047	2	2	2	0	0	0	0	0	0	0	0	0	0	0	0	0	0	0	0	0	0	0	0	0	0	0	0	0	0	0	0
559	113427	0.896	56.18	62.67	0.833	11.94	14.34	0.879	12.49	14.21	0.902	14.26	15.81	0.956	17.5	18.31	1.1397	43.5116	2	2	2	0	0	0	0	0	0	0	0	0	0	0	0	0	0	0	0	0	0	0	0	0	0	0	0	0	0	0	0
560	113430	0.913	54.65	59.85	0.815	10.19	12.5	0.905	13.48	14.9	0.984	15.02	15.27	0.929	15.95	17.17	1.1546	42.9268	2	2	2	0	0	0	0	0	0	0	0	0	0	0	0	0	0	0	0	0	0	0	0	0	0	0	0	0	0	0	0
561	113437	1.063	75.75	71.28	0.939	15.38	16.38	0.982	15.99	16.28	1.098	20.17	18.37	1.195	24.21	20.26	1.1209	46.9047	2	2	2	0	0	0	0	0	0	0	0	0	0	0	0	0	0	0	0	0	0	0	0	0	0	0	0	0	0	0	0
562	113440	0.901	53.93	59.84	0.88	11.79	13.4	0.918	13.32	14.51	0.922	13.97	15.14	0.884	14.85	16.79	1.1328	42.3608	2	2	2	0	0	0	0	0	0	0	0	0	0	0	0	0	0	0	0	0	0	0	0	0	0	0	0	0	0	0	0
563	113446	0.882	51.81	58.73	0.77	10.94	14.21	0.883	12.79	14.49	0.905	12.29	13.58	0.961	15.8	16.44	1.1427	37.36	2	2	2	0	0	0	0	0	0	0	0	0	0	0	0	0	0	0	0	0	0	0	0	0	0	0	0	0	0	0	0
564	113448	1.067	58.45	54.78	0.949	12.1	12.75	1.016	12.81	12.6	1.127	14.58	12.94	1.151	18.96	16.48	1.1332	46.7285	2	2	2	0	0	0	0	0	0	0	0	0	0	0	0	0	0	0	0	0	0	0	0	0	0	0	0	0	0	0	0
565	113450	1.046	54.56	52.18	0.968	12.32	12.72	1.031	11.55	11.2	1.068	14.98	14.03	1.105	15.71	14.22	1.1369	43.5812	2	2	2	0	0	0	0	0	0	0	0	0	0	0	0	0	0	0	0	0	0	0	0	0	0	0	0	0	0	0	0
566	113452	1.245	83.93	67.41	1.205	17.71	14.7	1.179	18.32	15.54	1.26	21.01	16.68	1.312	26.89	20.5	1.1407	41.3586	2	2	2	0	0	0	0	0	0	0	0	0	0	0	0	0	0	0	0	0	0	0	0	0	0	0	0	0	0	0	0
567	113455	1.179	87.06	73.84	0.961	13.95	14.51	1.147	22.02	19.2	1.24	24.05	19.4	1.305	27.04	20.72	1.1306	42.0159	2	1	1	0	1	1	0	0	0	0	0	0	0	0	0	55	2	2	0	0	0	0	0	0	0	0	0	0	0	0	0
568	113457	0.957	56.69	59.21	0.872	12.02	13.79	1.008	14.43	14.32	1.02	15.1	14.81	0.929	15.14	16.3	1.13	45.3153	2	2	2	0	0	0	0	0	0	0	0	0	0	0	0	0	0	0	0	0	0	0	0	0	0	0	0	0	0	0	0
569	113461	0.98	61.07	62.33	0.927	13.4	14.46	0.959	14.7	15.33	0.978	15.63	15.97	1.046	17.34	16.57	1.1405	45.5248	2	2	2	0	0	0	0	0	0	0	0	0	0	0	0	0	0	0	0	0	0	0	0	0	0	0	0	0	0	0	0
570	113467	0.912	50.25	55.07	0.868	9.98	11.5	0.872	10.37	11.89	0.949	14.18	14.93	0.939	15.72	16.75	1.1506	43.0824	2	2	2	0	0	0	0	0	0	0	0	0	0	0	0	0	0	0	0	0	0	0	0	0	0	0	0	0	0	0	0
571	113473	0.88	47.87	54.39	0.848	9.86	11.63	0.918	11.07	12.06	0.88	11.83	13.44	0.876	15.11	17.26	1.1545	44.4075	2	2	2	0	0	0	0	0	0	0	0	0	0	0	0	0	0	0	0	0	0	0	0	0	0	0	0	0	0	0	0
572	113475	0.728	36.67	50.39	0.694	8.62	12.43	0.718	8.68	12.1	0.755	9.55	12.65	0.743	9.82	13.21	1.1554	45.593	2	2	2	0	0	0	0	0	0	0	0	0	0	0	0	0	0	0	0	0	0	0	0	0	0	0	0	0	0	0	0
573	113479	0.761	38.4	50.46	0.73	8.36	11.45	0.725	8.49	11.71	0.826	10.35	12.54	0.759	11.2	14.76	1.1478	41.8365	2	2	2	0	0	0	0	0	0	0	0	0	0	0	0	0	0	0	0	0	0	0	0	0	0	0	0	0	0	0	0
574	113501	0.92	58.34	63.39	0.857	11.53	13.46	0.883	13	14.72	0.956	17.11	17.89	0.964	16.7	17.32	1.1222	42.7047	2	2	2	0	0	0	0	0	0	0	0	0	0	0	0	0	0	0	0	0	0	0	0	0	0	0	0	0	0	0	0
575	113511	0.993	55.23	55.6	1.02	12.19	11.95	1.028	12.5	12.16	1.041	15.42	14.81	0.907	15.12	16.68	1.1324	42.8047	2	2	2	0	0	0	0	0	0	0	0	0	0	0	0	0	0	0	0	0	0	0	0	0	0	0	0	0	0	0	0
576	113516	1.329	90.15	67.85	1.285	20.78	16.17	1.393	22.52	16.16	1.348	22.1	16.4	1.294	24.75	19.12	1.1268	41.008	2	1	2	0	1	0	0	0	0	0	0	0	0	0	0	53	2	1	0	0	0	0	0	0	0	0	0	0	0	0	0
577	113519	0.892	49.25	55.22	0.834	10.15	12.16	0.853	11.15	13.07	0.937	14.35	15.31	0.926	13.6	14.68	1.1577	46.2787	2	2	2	0	0	0	0	0	0	0	0	0	0	0	0	0	0	0	0	0	0	0	0	0	0	0	0	0	0	0	0
578	113528	1.103	73.09	66.24	1.045	17.01	16.28	1.058	16.75	15.83	1.15	18.4	16	1.154	20.92	18.13	1.1315	43.0473	2	1	2	0	5	0	0	0	0	0	0	0	0	0	0	35	1	0	40	1	0	50	2	1	55	2	1	55	2	2	0
579	113541	1.07	59.22	55.36	0.963	12.1	12.56	1.016	12.64	12.44	1.101	15.84	14.39	1.167	18.63	15.96	1.1326	43.905	2	2	2	0	0	0	0	0	0	0	0	0	0	0	0	0	0	0	0	0	0	0	0	0	0	0	0	0	0	0	0
580	113542	0.679	36.37	53.57	0.581	7.09	12.21	0.68	8.06	11.85	0.758	10.72	14.14	0.683	10.5	15.37	1.1335	42.9415	2	2	1	0	0	1	0	0	0	0	0	0	0	0	0	0	0	0	0	0	0	0	0	0	0	0	0	0	0	0	0
581	113546	0.663	39.83	60.11	0.589	8.19	13.9	0.645	9.58	14.86	0.733	11.27	15.39	0.676	10.79	15.96	1.141	47.2127	2	2	2	0	0	0	0	0	0	0	0	0	0	0	0	0	0	0	0	0	0	0	0	0	0	0	0	0	0	0	0
582	113548	0.939	53.13	56.56	0.813	11.35	13.97	0.881	12.59	14.29	1.04	15.06	14.48	1.022	14.13	13.83	1.146	48.5115	2	1	2	0	2	0	0	0	0	0	0	0	0	0	0	78	2	1	80	2	1	0	0	0	0	0	0	0	0	0	0
583	113553	1.004	60.32	60.06	0.952	12.07	12.68	0.943	12.72	13.49	1.114	19.79	17.76	0.976	15.75	16.14	1.144	37.8501	2	2	2	0	0	0	0	0	0	0	0	0	0	0	0	0	0	0	0	0	0	0	0	0	0	0	0	0	0	0	0
584	113560	0.934	50.2	53.73	0.864	10.04	11.63	0.883	10.72	12.14	0.99	14.89	15.04	0.975	14.55	14.92	1.1556	43.3422	2	2	2	0	0	0	0	0	0	0	0	0	0	0	0	0	0	0	0	0	0	0	0	0	0	0	0	0	0	0	0
585	113566	1.178	79.82	67.78	1.148	18.04	15.72	1.126	16.53	14.68	1.201	21.63	18.01	1.219	23.62	19.37	1.1473	44.5417	2	2	2	0	0	0	0	0	0	0	0	0	0	0	0	0	0	0	0	0	0	0	0	0	0	0	0	0	0	0	0
586	113575	0.96	77.63	80.85	0.982	17.72	18.05	0.896	16.77	18.73	0.933	19.16	20.52	1.019	23.99	23.55	1.1426	40.669	1	1	2	1	1	0	56	2	3	0	0	0	0	0	0	49	1	0	0	0	0	0	0	0	0	0	0	0	0	0	0
587	113580	1.106	60.75	54.92	1.05	12.94	12.32	1.074	13.76	12.81	1.105	15.21	13.76	1.175	18.84	16.03	1.1496	41.4717	2	2	2	0	0	0	0	0	0	0	0	0	0	0	0	0	0	0	0	0	0	0	0	0	0	0	0	0	0	0	0
588	113581	0.848	49.41	58.3	0.802	11.08	13.82	0.836	11.66	13.95	0.871	12.65	14.52	0.876	14.02	16.01	1.1312	45.9273	2	2	2	0	0	0	0	0	0	0	0	0	0	0	0	0	0	0	0	0	0	0	0	0	0	0	0	0	0	0	0
589	113582	1.05	80.63	76.75	1.016	17.39	17.12	1.049	18.8	17.92	1.067	21.54	20.2	1.064	22.9	21.52	1.1312	47.185	2	1	2	0	1	0	0	0	0	0	0	0	0	0	0	15	1	0	0	0	0	0	0	0	0	0	0	0	0	0	0
590	113591	1.029	67.86	65.95	0.897	12.44	13.88	1.027	16.19	15.77	1.059	19.07	18	1.102	20.16	18.3	1.1546	44.0089	2	2	2	0	0	0	0	0	0	0	0	0	0	0	0	0	0	0	0	0	0	0	0	0	0	0	0	0	0	0	0
591	113600	1.041	55.53	53.32	0.964	11.65	12.09	1.006	13.16	13.08	1.08	15.27	14.14	1.103	15.45	14.01	1.1374	47.1797	2	2	2	0	0	0	0	0	0	0	0	0	0	0	0	0	0	0	0	0	0	0	0	0	0	0	0	0	0	0	0
592	113615	1.086	65.5	60.29	1.031	13.25	12.85	1.104	15.31	13.87	1.126	18.23	16.19	1.077	18.71	17.38	1.1516	43.4253	2	2	2	0	0	0	0	0	0	0	0	0	0	0	0	0	0	0	0	0	0	0	0	0	0	0	0	0	0	0	0
593	113616	1.224	79.2	64.72	1.187	17.49	14.74	1.213	18.67	15.39	1.25	21.04	16.83	1.239	22	17.76	1.1374	46.0757	2	2	2	0	0	0	0	0	0	0	0	0	0	0	0	0	0	0	0	0	0	0	0	0	0	0	0	0	0	0	0
594	113619	1.093	57.03	52.16	1.106	12.6	11.4	1.156	12.68	10.97	1.114	15.78	14.16	1.022	15.97	15.63	1.1292	44.2373	2	2	2	0	0	0	0	0	0	0	0	0	0	0	0	0	0	0	0	0	0	0	0	0	0	0	0	0	0	0	0
595	113621	0.736	35.39	48.06	0.698	7.35	10.54	0.817	9.21	11.28	0.773	9.95	12.87	0.664	8.88	13.38	1.1363	47.8266	2	2	2	0	0	0	0	0	0	0	0	0	0	0	0	0	0	0	0	0	0	0	0	0	0	0	0	0	0	0	0
596	113631	0.885	47.49	53.69	0.839	9.35	11.14	0.882	9.98	11.32	0.937	13.83	14.77	0.871	14.33	16.46	1.1346	47.1402	2	2	2	0	0	0	0	0	0	0	0	0	0	0	0	0	0	0	0	0	0	0	0	0	0	0	0	0	0	0	0
597	113639	0.965	55.6	57.6	0.895	10.82	12.09	0.94	12.72	13.54	0.951	14.48	15.23	1.05	17.58	16.75	1.1294	45.3281	2	2	2	0	0	0	0	0	0	0	0	0	0	0	0	0	0	0	0	0	0	0	0	0	0	0	0	0	0	0	0
598	113648	1.245	71.16	57.15	1.09	14.25	13.08	1.23	17.01	13.84	1.317	19.37	14.71	1.321	20.52	15.53	1.1389	40.0933	2	2	2	0	0	0	0	0	0	0	0	0	0	0	0	0	0	0	0	0	0	0	0	0	0	0	0	0	0	0	0
599	113649	1.169	82.54	70.62	1.122	17.26	15.38	1.231	21.42	17.4	1.181	22.32	18.9	1.137	21.54	18.94	1.1468	34.5311	2	2	2	0	0	0	0	0	0	0	0	0	0	0	0	0	0	0	0	0	0	0	0	0	0	0	0	0	0	0	0
600	113664	1.627	122.94	75.55	1.491	27.41	18.38	1.622	29.95	18.47	1.66	31.04	18.7	1.727	34.54	20	1.1418	46.5216	2	2	2	0	0	0	0	0	0	0	0	0	0	0	0	0	0	0	0	0	0	0	0	0	0	0	0	0	0	0	0
601	113668	1.552	127.59	82.22	1.387	24.36	17.56	1.489	26.88	18.05	1.593	33.01	20.72	1.674	43.35	25.89	1.1329	40.0792	2	2	2	0	0	0	0	0	0	0	0	0	0	0	0	0	0	0	0	0	0	0	0	0	0	0	0	0	0	0	0
602	113672	1.075	61.01	56.75	0.97	11.2	11.54	1.038	13.67	13.17	1.094	15.56	14.22	1.155	20.58	17.81	1.1535	42.4855	2	2	2	0	0	0	0	0	0	0	0	0	0	0	0	0	0	0	0	0	0	0	0	0	0	0	0	0	0	0	0
603	113684	1.45	111.79	77.09	1.33	24.45	18.39	1.424	24.24	17.03	1.489	29.26	19.65	1.536	33.83	22.02	1.1399	36.1423	2	2	2	0	0	0	0	0	0	0	0	0	0	0	0	0	0	0	0	0	0	0	0	0	0	0	0	0	0	0	0
604	113691	0.979	58.5	59.73	0.928	13.62	14.68	0.959	14.45	15.06	0.998	13.87	13.9	1.03	16.56	16.09	1.1365	44.9859	2	2	2	0	0	0	0	0	0	0	0	0	0	0	0	0	0	0	0	0	0	0	0	0	0	0	0	0	0	0	0
605	113699	0.918	46.32	50.44	0.877	9.37	10.68	0.941	11.72	12.46	0.915	13.54	14.8	0.936	11.69	12.49	1.1289	48.0473	2	2	2	0	0	0	0	0	0	0	0	0	0	0	0	0	0	0	0	0	0	0	0	0	0	0	0	0	0	0	0
606	113702	1.128	76.86	68.13	1.02	15.45	15.14	1.105	18.55	16.79	1.176	21.02	17.88	1.192	21.83	18.32	1.1504	42.5143	2	2	2	0	0	0	0	0	0	0	0	0	0	0	0	0	0	0	0	0	0	0	0	0	0	0	0	0	0	0	0
607	113733	0.726	43.4	59.75	0.653	8.24	12.62	0.708	10.38	14.66	0.718	11.66	16.24	0.809	13.12	16.22	1.121	44.5849	2	2	2	0	0	0	0	0	0	0	0	0	0	0	0	0	0	0	0	0	0	0	0	0	0	0	0	0	0	0	0
608	113735	0.843	55.29	65.59	0.785	12.66	16.12	0.865	13.49	15.6	0.817	13.84	16.93	0.904	15.31	16.93	1.1555	41.308	2	1	2	0	1	0	0	0	0	0	0	0	0	0	0	9	1	0	0	0	0	0	0	0	0	0	0	0	0	0	0
609	113736	1.076	73.12	67.94	1.129	17.3	15.33	1.095	18.11	16.55	1.028	16.95	16.49	1.061	20.76	19.58	1.1496	39.5997	2	2	2	0	0	0	0	0	0	0	0	0	0	0	0	0	0	0	0	0	0	0	0	0	0	0	0	0	0	0	0
610	113751	1.279	101.2	79.11	1.252	23.3	18.6	1.24	23.51	18.96	1.292	26.05	20.17	1.326	28.34	21.38	1.1449	40.0811	2	2	2	0	0	0	0	0	0	0	0	0	0	0	0	0	0	0	0	0	0	0	0	0	0	0	0	0	0	0	0
611	113770	1.175	81.07	69	1.11	16.82	15.14	1.193	19.3	16.19	1.183	20.55	17.37	1.202	24.4	20.3	1.1356	43.4671	2	2	2	0	0	0	0	0	0	0	0	0	0	0	0	0	0	0	0	0	0	0	0	0	0	0	0	0	0	0	0
612	113775	0.835	50.58	60.55	0.845	11.8	13.97	0.821	12.04	14.67	0.865	13.92	16.1	0.811	12.82	15.81	1.139	49.071	2	1	2	0	1	0	0	0	0	0	0	0	0	0	0	56	2	1	0	0	0	0	0	0	0	0	0	0	0	0	0
613	113776	1.314	98.61	75.04	1.254	20.46	16.32	1.32	25.89	19.6	1.356	24.28	17.9	1.32	27.99	21.21	1.1322	39.1083	2	2	2	0	0	0	0	0	0	0	0	0	0	0	0	0	0	0	0	0	0	0	0	0	0	0	0	0	0	0	0
614	113777	0.986	60.5	61.33	1.008	14.87	14.76	1.004	15.77	15.71	0.958	15.65	16.33	0.978	14.2	14.53	1.1303	43.039	2	1	2	0	1	0	0	0	0	0	0	0	0	0	0	62	2	1	0	0	0	0	0	0	0	0	0	0	0	0	0
615	113787	1.004	71.26	70.95	0.939	14.41	15.35	1.015	16.61	16.36	0.987	17.47	17.7	1.057	22.78	21.54	1.1218	43.5098	2	2	2	0	0	0	0	0	0	0	0	0	0	0	0	0	0	0	0	0	0	0	0	0	0	0	0	0	0	0	0
616	113799	0.962	62.5	64.98	0.896	11.54	12.89	0.967	15.23	15.74	1.001	18.11	18.08	0.965	17.62	18.27	1.1532	42.6468	2	2	2	0	0	0	0	0	0	0	0	0	0	0	0	0	0	0	0	0	0	0	0	0	0	0	0	0	0	0	0
617	113815	0.939	65.69	69.92	0.891	12.73	14.28	0.98	18.17	18.54	0.982	16.47	16.77	0.901	18.32	20.33	1.153	42.1241	2	2	2	0	0	0	0	0	0	0	0	0	0	0	0	0	0	0	0	0	0	0	0	0	0	0	0	0	0	0	0
618	113819	1.151	77.94	67.71	1.08	16.51	15.29	1.126	17.49	15.53	1.191	20.54	17.25	1.192	23.41	19.64	1.1505	40.5864	2	2	2	0	0	0	0	0	0	0	0	0	0	0	0	0	0	0	0	0	0	0	0	0	0	0	0	0	0	0	0
619	113852	1.095	48.77	44.55	0.976	9.88	10.12	1.057	10.95	10.35	1.13	14.21	12.58	1.195	13.73	11.49	1.1405	41.9231	2	2	2	0	0	0	0	0	0	0	0	0	0	0	0	0	0	0	0	0	0	0	0	0	0	0	0	0	0	0	0
620	113856	0.95	48.81	51.4	0.898	10.18	11.33	0.964	12.67	13.14	0.985	14.08	14.29	0.94	11.88	12.64	1.148	38.3859	2	2	2	0	0	0	0	0	0	0	0	0	0	0	0	0	0	0	0	0	0	0	0	0	0	0	0	0	0	0	0
621	113860	1.105	61.06	55.24	1.161	14.4	12.4	1.12	14.26	12.73	1.126	15.46	13.73	1.034	16.94	16.38	1.1257	45.1592	2	2	2	0	0	0	0	0	0	0	0	0	0	0	0	0	0	0	0	0	0	0	0	0	0	0	0	0	0	0	0
622	113866	0.792	46.16	58.28	0.787	10.43	13.24	0.77	10.49	13.63	0.81	12.08	14.92	0.798	13.16	16.5	1.1476	43.7559	2	2	2	0	0	0	0	0	0	0	0	0	0	0	0	0	0	0	0	0	0	0	0	0	0	0	0	0	0	0	0
623	113869	1.35	114.74	84.97	1.259	21.08	16.74	1.327	29.4	22.16	1.393	30.02	21.55	1.396	34.25	24.53	1.1317	47.7802	2	2	2	0	0	0	0	0	0	0	0	0	0	0	0	0	0	0	0	0	0	0	0	0	0	0	0	0	0	0	0
624	113870	1.031	69.45	67.36	0.922	14.72	15.96	0.986	15.65	15.87	1.089	19.24	17.67	1.112	19.85	17.85	1.1528	43.1295	2	2	2	0	0	0	0	0	0	0	0	0	0	0	0	0	0	0	0	0	0	0	0	0	0	0	0	0	0	0	0
625	113871	1.012	60.12	59.41	0.914	11.79	12.9	0.96	13.5	14.07	1.031	15.85	15.37	1.111	18.97	17.08	1.1366	41.7841	2	2	2	0	0	0	0	0	0	0	0	0	0	0	0	0	0	0	0	0	0	0	0	0	0	0	0	0	0	0	0
626	113880	1.106	58.33	52.76	1.065	14.31	13.43	1.095	13.12	11.99	1.133	14.75	13.02	1.128	16.16	14.32	1.1371	43.6678	2	2	2	0	0	0	0	0	0	0	0	0	0	0	0	0	0	0	0	0	0	0	0	0	0	0	0	0	0	0	0
627	113895	0.934	47.91	51.3	0.797	8.93	11.2	0.922	10.63	11.53	0.972	13.21	13.59	1.011	15.14	14.98	1.1327	44.1167	2	2	2	0	0	0	0	0	0	0	0	0	0	0	0	0	0	0	0	0	0	0	0	0	0	0	0	0	0	0	0
628	113897	1.119	76.21	68.09	1.063	16.43	15.47	1.178	18.81	15.97	1.14	20.16	17.68	1.097	20.8	18.97	1.1272	46.4224	2	2	2	0	0	0	0	0	0	0	0	0	0	0	0	0	0	0	0	0	0	0	0	0	0	0	0	0	0	0	0
629	113900	1.002	67.12	66.95	0.918	13.82	15.06	1.02	16.51	16.18	0.974	16.93	17.38	1.083	19.86	18.33	1.1331	42.3061	2	1	2	0	1	0	0	0	0	0	0	0	0	0	0	14	1	0	0	0	0	0	0	0	0	0	0	0	0	0	0
630	113904	0.862	43.25	50.16	0.837	8.89	10.62	0.896	10.64	11.88	0.879	10.72	12.19	0.84	13	15.48	1.1331	46.1516	2	1	2	0	1	0	0	0	0	0	0	0	0	0	0	46	1	0	0	0	0	0	0	0	0	0	0	0	0	0	0
631	113921	0.873	49.38	56.58	0.812	10.81	13.31	0.848	12.22	14.42	0.903	13.49	14.94	0.925	12.86	13.9	1.1283	46.3149	2	2	2	0	0	0	0	0	0	0	0	0	0	0	0	0	0	0	0	0	0	0	0	0	0	0	0	0	0	0	0
632	113922	1.26	94.15	74.72	1.151	18.87	16.4	1.221	21.4	17.52	1.334	23.7	17.77	1.31	30.19	23.04	1.1463	41.7539	2	1	2	0	1	0	0	0	0	0	0	0	0	0	0	11	1	0	0	0	0	0	0	0	0	0	0	0	0	0	0
633	113936	1.194	86.16	72.19	1.112	16.94	15.24	1.155	20.49	17.74	1.279	23.18	18.12	1.211	25.55	21.09	1.1319	42.93	2	2	2	0	0	0	0	0	0	0	0	0	0	0	0	0	0	0	0	0	0	0	0	0	0	0	0	0	0	0	0
634	113943	1.024	66.64	65.06	0.984	13.52	13.73	1.082	16.02	14.81	1.017	16.82	16.54	1.015	20.28	19.98	1.1332	47.4832	2	2	2	0	0	0	0	0	0	0	0	0	0	0	0	0	0	0	0	0	0	0	0	0	0	0	0	0	0	0	0
635	113945	0.917	61.4	66.98	0.836	11.59	13.86	0.926	14.78	15.96	0.966	17.06	17.65	0.921	17.97	19.5	1.137	44.3821	2	1	2	0	1	0	0	0	0	0	0	0	0	0	0	50	2	2	0	0	0	0	0	0	0	0	0	0	0	0	0
636	113971	1.357	93.2	68.67	1.232	19.66	15.95	1.344	21.6	16.06	1.459	24.71	16.93	1.381	27.23	19.71	1.134	42.9879	2	2	2	0	0	0	0	0	0	0	0	0	0	0	0	0	0	0	0	0	0	0	0	0	0	0	0	0	0	0	0
637	113973	0.727	36.38	50.03	0.677	7.11	10.5	0.664	7.41	11.17	0.745	9.43	12.66	0.792	12.43	15.7	1.1322	43.3085	2	2	2	0	0	0	0	0	0	0	0	0	0	0	0	0	0	0	0	0	0	0	0	0	0	0	0	0	0	0	0
638	113978	0.774	40.66	52.52	0.789	9.14	11.6	0.75	9.09	12.12	0.817	11.07	13.55	0.745	11.36	15.25	1.1439	42.5804	1	2	2	1	0	0	77	2	1	0	0	0	0	0	0	0	0	0	0	0	0	0	0	0	0	0	0	0	0	0	0
639	113982	1.06	32.48	30.65	1.081	14.77	13.66	1.264	19.37	15.33	1.194	18.2	15.25	1.043	17.71	16.98	1.1135	43.6592	2	2	2	0	0	0	0	0	0	0	0	0	0	0	0	0	0	0	0	0	0	0	0	0	0	0	0	0	0	0	0
640	113998	0.91	49.67	54.58	0.859	10.5	12.22	0.939	12.55	13.37	0.902	12.97	14.38	0.934	13.64	14.61	1.1389	47.4508	2	1	2	0	2	0	0	0	0	0	0	0	0	0	0	13	1	0	26	1	0	0	0	0	0	0	0	0	0	0	0
641	114008	1.199	81.81	68.25	1.182	19.6	16.58	1.21	18.96	15.67	1.246	20.83	16.72	1.163	22.42	19.28	1.1265	41.0598	2	2	2	0	0	0	0	0	0	0	0	0	0	0	0	0	0	0	0	0	0	0	0	0	0	0	0	0	0	0	0
642	114015	1.418	116.39	82.07	1.341	25.5	19.02	1.41	25.03	17.76	1.432	30.56	21.34	1.474	35.3	23.96	1.1309	47.4729	2	2	2	0	0	0	0	0	0	0	0	0	0	0	0	0	0	0	0	0	0	0	0	0	0	0	0	0	0	0	0
643	114019	1.011	64.88	64.19	0.886	13.03	14.71	0.97	14.34	14.79	1.081	18.53	17.14	1.081	18.97	17.55	1.1532	43.0114	2	2	2	0	0	0	0	0	0	0	0	0	0	0	0	0	0	0	0	0	0	0	0	0	0	0	0	0	0	0	0
644	114021	0.895	64.85	72.45	0.804	13.53	16.83	0.853	15.07	17.66	0.941	16.53	17.57	0.967	19.72	20.38	1.1281	43.3444	2	2	2	0	0	0	0	0	0	0	0	0	0	0	0	0	0	0	0	0	0	0	0	0	0	0	0	0	0	0	0
645	114023	1.163	91.97	79.06	1.127	21.85	19.38	1.154	22.1	19.16	1.153	22.95	19.9	1.216	25.07	20.62	1.139	39.8754	2	2	2	0	0	0	0	0	0	0	0	0	0	0	0	0	0	0	0	0	0	0	0	0	0	0	0	0	0	0	0
646	114031	0.864	62.75	64.82	0.884	13.54	15.31	0.917	12.76	13.92	1.003	16.15	16.1	1.042	20.3	19.48	1.1511	41.6315	2	2	2	0	0	0	0	0	0	0	0	0	0	0	0	0	0	0	0	0	0	0	0	0	0	0	0	0	0	0	0
647	114036	1.096	58.96	53.8	1.049	12.69	12.09	1.128	13.33	11.82	1.085	15.33	14.13	1.118	17.61	15.75	1.1253	40.2432	2	2	2	0	0	0	0	0	0	0	0	0	0	0	0	0	0	0	0	0	0	0	0	0	0	0	0	0	0	0	0
648	114039	1.571	105.51	67.18	1.509	23.67	15.68	1.599	23.49	14.69	1.631	29.32	17.98	1.541	29.03	18.84	1.124	42.4037	2	2	2	0	0	0	0	0	0	0	0	0	0	0	0	0	0	0	0	0	0	0	0	0	0	0	0	0	0	0	0
649	114042	1.005	58.96	58.68	0.979	12.67	12.95	1.038	15.91	15.33	1.032	15.92	15.42	0.965	14.47	14.99	1.1284	42.5331	2	2	2	0	0	0	0	0	0	0	0	0	0	0	0	0	0	0	0	0	0	0	0	0	0	0	0	0	0	0	0
650	114049	1.177	69.23	58.8	1.006	14.58	14.49	1.128	14.67	13.01	1.297	18.35	14.15	1.261	21.64	17.16	1.1339	43.0159	2	2	2	0	0	0	0	0	0	0	0	0	0	0	0	0	0	0	0	0	0	0	0	0	0	0	0	0	0	0	0
651	114059	0.969	59.04	60.92	0.906	12.44	13.73	0.966	13.49	13.97	1.016	16.1	15.85	0.979	17	17.37	1.1467	42.1973	2	2	2	0	0	0	0	0	0	0	0	0	0	0	0	0	0	0	0	0	0	0	0	0	0	0	0	0	0	0	0
652	114083	1.332	93.03	69.82	1.193	17.34	14.54	1.265	20.74	16.39	1.389	24.92	17.95	1.434	30.03	20.95	1.1462	41.3952	2	2	2	0	0	0	0	0	0	0	0	0	0	0	0	0	0	0	0	0	0	0	0	0	0	0	0	0	0	0	0
653	114098	0.895	43.55	48.66	0.824	8.37	10.17	0.877	10.35	11.8	0.95	12.7	13.37	0.91	12.12	13.32	1.1378	48.3886	2	2	2	0	0	0	0	0	0	0	0	0	0	0	0	0	0	0	0	0	0	0	0	0	0	0	0	0	0	0	0
654	114106	0.836	43.89	52.51	0.864	10.78	12.48	0.82	10.28	12.53	0.862	10.77	12.49	0.804	12.05	15	1.1337	47.7949	1	2	2	1	0	0	35	1	0	0	0	0	0	0	0	0	0	0	0	0	0	0	0	0	0	0	0	0	0	0	0
655	114123	1.068	65.33	61.19	1.011	14.35	14.19	1.062	14.28	13.45	1.056	17.05	16.14	1.129	19.65	17.4	1.1436	39.1902	2	2	2	0	0	0	0	0	0	0	0	0	0	0	0	0	0	0	0	0	0	0	0	0	0	0	0	0	0	0	0
656	114125	0.936	51.48	55.02	0.89	10.94	12.3	0.946	12.37	13.08	0.952	14.1	14.81	0.948	14.07	14.84	1.1367	42.3477	2	2	2	0	0	0	0	0	0	0	0	0	0	0	0	0	0	0	0	0	0	0	0	0	0	0	0	0	0	0	0
657	114130	0.705	38.17	54.17	0.615	7.8	12.68	0.677	9.3	13.74	0.81	11.08	13.68	0.71	9.99	14.07	1.1266	48.2446	2	2	2	0	0	0	0	0	0	0	0	0	0	0	0	0	0	0	0	0	0	0	0	0	0	0	0	0	0	0	0
658	114145	0.658	41.51	63.04	0.639	9.52	14.91	0.622	9.19	14.78	0.668	10.28	15.4	0.697	12.52	17.95	1.1525	42.7317	2	2	2	0	0	0	0	0	0	0	0	0	0	0	0	0	0	0	0	0	0	0	0	0	0	0	0	0	0	0	0
659	114147	0.925	48.99	52.95	0.798	10.5	13.17	0.925	11.52	12.46	0.978	13.88	14.19	0.997	13.09	13.14	1.1345	48.8039	2	2	1	0	0	1	0	0	0	0	0	0	0	0	0	0	0	0	0	0	0	0	0	0	0	0	0	0	0	0	0
660	114148	0.989	38.17	38.57	0.919	11.65	12.69	1.012	11.74	11.61	1.034	14.77	14.28	1.2	19.14	15.95	1.1276	46.1049	2	1	2	0	1	0	0	0	0	0	0	0	0	0	0	76	2	1	0	0	0	0	0	0	0	0	0	0	0	0	0
661	114159	1.057	65.37	61.85	0.941	14.35	15.25	1.001	14.59	14.58	1.103	16.19	14.68	1.168	20.24	17.34	1.1551	40.8893	2	2	2	0	0	0	0	0	0	0	0	0	0	0	0	0	0	0	0	0	0	0	0	0	0	0	0	0	0	0	0
662	114162	1.344	86.68	64.47	1.258	19	15.1	1.315	20.38	15.5	1.42	22.77	16.03	1.375	24.53	17.84	1.1426	39.5186	2	2	2	0	0	0	0	0	0	0	0	0	0	0	0	0	0	0	0	0	0	0	0	0	0	0	0	0	0	0	0
663	114163	1.004	51.68	51.46	0.93	10.2	10.97	0.979	10.65	10.88	1.078	14.41	13.37	1.01	16.42	16.25	1.1339	47.752	2	2	2	0	0	0	0	0	0	0	0	0	0	0	0	0	0	0	0	0	0	0	0	0	0	0	0	0	0	0	0
664	114169	1.497	104.76	69.99	1.486	23.36	15.72	1.492	26.11	17.51	1.459	27.15	18.61	1.551	28.14	18.14	1.1451	41.3226	2	2	2	0	0	0	0	0	0	0	0	0	0	0	0	0	0	0	0	0	0	0	0	0	0	0	0	0	0	0	0
665	114173	1.34	87.24	65.08	1.297	20.71	15.97	1.272	19.75	15.52	1.348	23.33	17.3	1.44	23.46	16.29	1.1261	44.8562	2	2	2	0	0	0	0	0	0	0	0	0	0	0	0	0	0	0	0	0	0	0	0	0	0	0	0	0	0	0	0
666	114182	0.924	44.97	48.65	0.818	9.35	11.44	0.933	11.69	12.52	0.961	13.37	13.92	0.98	10.56	10.77	1.1271	43.7156	2	2	2	0	0	0	0	0	0	0	0	0	0	0	0	0	0	0	0	0	0	0	0	0	0	0	0	0	0	0	0
667	114186	1.013	69.07	68.2	0.98	15.24	15.56	1.082	16.89	15.61	1.044	18.72	17.94	0.954	18.21	19.1	1.1354	45.9535	2	2	2	0	0	0	0	0	0	0	0	0	0	0	0	0	0	0	0	0	0	0	0	0	0	0	0	0	0	0	0
668	114203	1.099	83.88	76.31	1	16.31	16.31	1.037	17.3	16.68	1.134	23.25	20.51	1.184	27.01	22.81	1.133	46.7941	2	2	2	0	0	0	0	0	0	0	0	0	0	0	0	0	0	0	0	0	0	0	0	0	0	0	0	0	0	0	0
669	114231	1.07	16.14	15.56	1.084	13.47	12.43	1.173	15.98	13.63	1.172	16.78	14.32	1.037	16.14	15.56	1.1495	43.0787	2	2	2	0	0	0	0	0	0	0	0	0	0	0	0	0	0	0	0	0	0	0	0	0	0	0	0	0	0	0	0
670	114235	1.31	76.64	58.52	1.236	16.1	13.02	1.259	18.54	14.73	1.429	22.42	15.69	1.299	19.58	15.08	1.1431	36.2415	2	2	2	0	0	0	0	0	0	0	0	0	0	0	0	0	0	0	0	0	0	0	0	0	0	0	0	0	0	0	0
671	114237	0.968	55.53	57.37	0.916	11.67	12.74	0.961	12.97	13.5	1.044	15.54	14.88	0.944	15.34	16.26	1.1339	46.2973	2	2	2	0	0	0	0	0	0	0	0	0	0	0	0	0	0	0	0	0	0	0	0	0	0	0	0	0	0	0	0
672	114240	0.835	45.31	54.27	0.776	10.9	14.05	0.856	9.87	11.53	0.877	12.64	14.43	0.834	11.89	14.26	1.1516	41.6916	1	2	2	1	0	0	74	2	2	0	0	0	0	0	0	0	0	0	0	0	0	0	0	0	0	0	0	0	0	0	0
673	114251	0.879	53.3	60.67	0.862	12	13.93	0.873	12.31	14.1	0.894	14.73	16.48	0.882	14.26	16.16	1.1402	38.8578	2	2	2	0	0	0	0	0	0	0	0	0	0	0	0	0	0	0	0	0	0	0	0	0	0	0	0	0	0	0	0
674	114254	0.91	47.83	52.57	0.86	11.09	12.89	0.971	12.55	12.93	0.933	11.63	12.47	0.88	12.56	14.28	1.1344	46.0073	2	2	2	0	0	0	0	0	0	0	0	0	0	0	0	0	0	0	0	0	0	0	0	0	0	0	0	0	0	0	0
675	114269	1.104	56.26	50.94	1.001	11.46	11.45	1.011	11.26	11.15	1.161	15.22	13.11	1.202	18.31	15.23	1.144	41.5021	2	2	2	0	0	0	0	0	0	0	0	0	0	0	0	0	0	0	0	0	0	0	0	0	0	0	0	0	0	0	0
676	114293	1.181	77.09	65.27	1.063	15.48	14.57	1.137	18.21	16.01	1.235	21.22	17.18	1.267	22.18	17.51	1.1339	44.7554	2	2	2	0	0	0	0	0	0	0	0	0	0	0	0	0	0	0	0	0	0	0	0	0	0	0	0	0	0	0	0
677	114298	0.724	38.85	53.66	0.702	8.23	11.73	0.74	8.9	12.03	0.705	9	12.76	0.742	12.72	17.14	1.1286	48.678	2	2	2	0	0	0	0	0	0	0	0	0	0	0	0	0	0	0	0	0	0	0	0	0	0	0	0	0	0	0	0
678	114300	0.708	33.2	46.9	0.714	8.02	11.23	0.73	8.35	11.45	0.692	8.24	11.91	0.697	8.58	12.31	1.1366	51.608	2	2	2	0	0	0	0	0	0	0	0	0	0	0	0	0	0	0	0	0	0	0	0	0	0	0	0	0	0	0	0
679	114305	1.11	69.6	62.73	0.974	13.38	13.74	1.103	16.96	15.38	1.142	18.18	15.92	1.192	21.08	17.69	1.134	45.6365	2	2	2	0	0	0	0	0	0	0	0	0	0	0	0	0	0	0	0	0	0	0	0	0	0	0	0	0	0	0	0
680	114307	0.884	61.34	69.42	0.868	13.38	15.42	0.869	14.26	16.42	0.89	16.88	18.97	0.904	16.82	18.61	1.1328	47.1002	2	1	2	0	1	0	0	0	0	0	0	0	0	0	0	20	1	0	0	0	0	0	0	0	0	0	0	0	0	0	0
681	114311	1.149	80.3	69.86	1.106	17.07	15.44	1.184	18.84	15.91	1.152	21.51	18.68	1.154	22.88	19.83	1.1342	45.4478	2	2	2	0	0	0	0	0	0	0	0	0	0	0	0	0	0	0	0	0	0	0	0	0	0	0	0	0	0	0	0
682	114320	1.403	85.54	60.96	1.318	19.69	14.94	1.342	20.09	14.97	1.498	23.48	15.68	1.449	22.27	15.37	1.1324	45.1685	2	2	2	0	0	0	0	0	0	0	0	0	0	0	0	0	0	0	0	0	0	0	0	0	0	0	0	0	0	0	0
683	114323	0.905	49.94	55.16	0.837	10.5	12.55	0.873	11.36	13.02	0.932	13.18	14.15	0.964	14.89	15.45	1.1372	52.0777	2	2	2	0	0	0	0	0	0	0	0	0	0	0	0	0	0	0	0	0	0	0	0	0	0	0	0	0	0	0	0
684	114324	0.757	40.17	53.05	0.696	8.65	12.43	0.739	9.26	12.52	0.829	10.49	12.66	0.763	11.78	15.44	1.155	44.5356	2	2	2	0	0	0	0	0	0	0	0	0	0	0	0	0	0	0	0	0	0	0	0	0	0	0	0	0	0	0	0
685	114331	0.988	54.32	54.97	0.875	11.05	12.64	0.995	12.67	12.73	1.025	14.01	13.67	1.041	16.59	15.93	1.1326	47.3992	2	2	2	0	0	0	0	0	0	0	0	0	0	0	0	0	0	0	0	0	0	0	0	0	0	0	0	0	0	0	0
686	114334	0.825	40.41	48.95	0.801	9.03	11.27	0.864	10	11.58	0.865	10.38	12	0.78	11.01	14.1	1.1338	46.6541	2	2	2	0	0	0	0	0	0	0	0	0	0	0	0	0	0	0	0	0	0	0	0	0	0	0	0	0	0	0	0
687	114337	0.96	55.94	58.24	0.934	12.24	13.11	0.967	13	13.45	0.951	13.96	14.68	0.984	16.73	17.01	1.1451	40.4365	2	2	2	0	0	0	0	0	0	0	0	0	0	0	0	0	0	0	0	0	0	0	0	0	0	0	0	0	0	0	0
688	114346	1.231	74.6	60.62	1.234	17.34	14.05	1.166	16.47	14.13	1.233	18.79	15.23	1.279	22.01	17.21	1.1538	43.3208	2	2	2	0	0	0	0	0	0	0	0	0	0	0	0	0	0	0	0	0	0	0	0	0	0	0	0	0	0	0	0
689	114349	0.83	37.53	45.2	0.835	7.97	9.54	0.867	9.12	10.52	0.832	9.59	11.52	0.798	10.85	13.61	1.156	43.8591	2	2	2	0	0	0	0	0	0	0	0	0	0	0	0	0	0	0	0	0	0	0	0	0	0	0	0	0	0	0	0
690	114351	0.94	53.07	56.45	0.919	10.99	11.96	0.997	11.2	11.24	0.947	14.19	14.99	0.914	16.69	18.26	1.1397	43.0964	2	2	2	0	0	0	0	0	0	0	0	0	0	0	0	0	0	0	0	0	0	0	0	0	0	0	0	0	0	0	0
691	114352	0.817	40.39	49.44	0.776	9.03	11.64	0.759	9.33	12.29	0.861	10.35	12.03	0.865	11.67	13.49	1.1576	44.6904	2	2	2	0	0	0	0	0	0	0	0	0	0	0	0	0	0	0	0	0	0	0	0	0	0	0	0	0	0	0	0
692	114353	0.914	58.55	64.04	0.822	11.86	14.44	0.923	13.85	15	0.987	15.49	15.7	0.918	17.34	18.9	1.1298	44.9987	2	1	2	0	2	0	0	0	0	0	0	0	0	0	0	10	1	0	15	1	0	0	0	0	0	0	0	0	0	0	0
693	114369	0.813	44.47	54.68	0.76	9.16	12.06	0.815	10.84	13.29	0.818	11.07	13.54	0.848	13.39	15.79	1.1472	43.8957	2	2	2	0	0	0	0	0	0	0	0	0	0	0	0	0	0	0	0	0	0	0	0	0	0	0	0	0	0	0	0
694	114371	0.964	62.62	64.94	0.866	12.87	14.86	0.936	14.67	15.67	1.035	17.39	16.8	1.005	17.69	17.61	1.1278	44.351	2	2	2	0	0	0	0	0	0	0	0	0	0	0	0	0	0	0	0	0	0	0	0	0	0	0	0	0	0	0	0
695	114384	0.915	52.97	57.92	0.901	11.93	13.24	0.926	12.51	13.51	0.915	14.1	15.42	0.916	14.42	15.74	1.1218	47.4883	2	2	2	0	0	0	0	0	0	0	0	0	0	0	0	0	0	0	0	0	0	0	0	0	0	0	0	0	0	0	0
696	114388	1.077	54.06	50.2	0.969	10.54	10.88	1.041	12.95	12.45	1.128	14.44	12.79	1.145	16.13	14.09	1.1389	48.558	2	2	2	0	0	0	0	0	0	0	0	0	0	0	0	0	0	0	0	0	0	0	0	0	0	0	0	0	0	0	0
697	114389	1.14	69.93	61.32	1.198	17.53	14.64	1.2	16.37	13.64	1.135	16.52	14.56	1.056	19.52	18.49	1.1437	38.369	2	2	2	0	0	0	0	0	0	0	0	0	0	0	0	0	0	0	0	0	0	0	0	0	0	0	0	0	0	0	0
698	114403	1.036	57.65	55.65	0.945	11.84	12.53	1.046	13.06	12.49	1.085	17.76	16.37	1.051	14.99	14.27	1.1304	46.4058	2	2	2	0	0	0	0	0	0	0	0	0	0	0	0	0	0	0	0	0	0	0	0	0	0	0	0	0	0	0	0
699	114406	1.123	67.07	59.71	1.081	14.44	13.37	1.041	14.51	13.93	1.194	18.59	15.57	1.159	19.53	16.84	1.1353	43.707	2	2	2	0	0	0	0	0	0	0	0	0	0	0	0	0	0	0	0	0	0	0	0	0	0	0	0	0	0	0	0
700	114407	0.885	54.95	62.07	0.794	11.42	14.38	0.869	13.38	15.39	0.942	14.76	15.67	0.926	15.39	16.63	1.1534	40.8121	2	2	2	0	0	0	0	0	0	0	0	0	0	0	0	0	0	0	0	0	0	0	0	0	0	0	0	0	0	0	0
701	114409	1.178	66.19	56.2	1.131	14.23	12.58	1.166	15.83	13.58	1.181	17.02	14.41	1.223	19.11	15.62	1.143	38.1575	2	2	2	0	0	0	0	0	0	0	0	0	0	0	0	0	0	0	0	0	0	0	0	0	0	0	0	0	0	0	0
702	114413	0.85	25.97	30.57	1.017	11.28	11.09	0.98	10.08	10.29	0.834	13.09	15.69	0.866	12.88	14.88	1.1309	49.8984	1	2	2	1	0	0	56	2	1	0	0	0	0	0	0	0	0	0	0	0	0	0	0	0	0	0	0	0	0	0	0
703	114414	0.841	46.43	55.18	0.771	9.4	12.2	0.843	11.16	13.24	0.865	11.51	13.31	0.874	14.35	16.43	1.1539	42.8508	2	2	2	0	0	0	0	0	0	0	0	0	0	0	0	0	0	0	0	0	0	0	0	0	0	0	0	0	0	0	0
704	114420	1.137	59.36	52.19	1.046	13.84	13.24	1.12	13.98	12.48	1.161	14.52	12.5	1.219	17.03	13.97	1.1508	44.6086	2	2	2	0	0	0	0	0	0	0	0	0	0	0	0	0	0	0	0	0	0	0	0	0	0	0	0	0	0	0	0
705	114423	0.842	44.65	53.02	0.846	10.68	12.62	0.809	10.09	12.48	0.853	11.37	13.32	0.858	12.52	14.59	1.1526	43.1498	2	2	2	0	0	0	0	0	0	0	0	0	0	0	0	0	0	0	0	0	0	0	0	0	0	0	0	0	0	0	0
706	114444	1.273	102.22	80.28	1.219	21.34	17.51	1.298	26.52	20.44	1.286	26.37	20.51	1.283	27.99	21.82	1.1388	37.8622	2	1	2	0	1	0	0	0	0	0	0	0	0	0	0	22	1	0	0	0	0	0	0	0	0	0	0	0	0	0	0
707	114473	0.942	59.52	63.16	0.824	12.32	14.95	0.895	12.68	14.17	0.977	14.92	15.28	1.044	19.6	18.77	1.1354	48.7005	2	1	2	0	1	0	0	0	0	0	0	0	0	0	0	24	1	0	0	0	0	0	0	0	0	0	0	0	0	0	0
708	114481	1.381	104.02	75.31	1.359	22.98	16.91	1.438	27.86	19.37	1.382	26.48	19.16	1.344	26.7	19.87	1.1324	43.3394	2	2	2	0	0	0	0	0	0	0	0	0	0	0	0	0	0	0	0	0	0	0	0	0	0	0	0	0	0	0	0
709	114487	1.026	62.6	61.03	0.983	14.64	14.89	1.102	15.72	14.26	1.035	15.12	14.62	0.992	17.13	17.27	1.126	40.6306	2	2	2	0	0	0	0	0	0	0	0	0	0	0	0	0	0	0	0	0	0	0	0	0	0	0	0	0	0	0	0
710	114499	0.714	27.91	39.12	0.701	8.79	12.55	0.718	9.48	13.2	0.722	9.64	13.37	0.831	11.08	13.34	1.133	45.0199	2	2	2	0	0	0	0	0	0	0	0	0	0	0	0	0	0	0	0	0	0	0	0	0	0	0	0	0	0	0	0
711	114500	0.918	69.3	75.46	0.947	16.12	17.03	0.966	17.94	18.57	0.913	17.01	18.62	0.858	18.23	21.24	1.1337	45.0312	2	2	2	0	0	0	0	0	0	0	0	0	0	0	0	0	0	0	0	0	0	0	0	0	0	0	0	0	0	0	0
712	114519	0.83	50.74	61.14	0.782	10.97	14.03	0.866	12.45	14.38	0.865	13.13	15.17	0.808	14.19	17.56	1.1484	39.7885	2	2	2	0	0	0	0	0	0	0	0	0	0	0	0	0	0	0	0	0	0	0	0	0	0	0	0	0	0	0	0
713	114527	0.735	39.88	54.28	0.692	8.43	12.19	0.759	9.65	12.71	0.743	10.41	14.01	0.742	11.39	15.37	1.1359	45.7815	2	2	2	0	0	0	0	0	0	0	0	0	0	0	0	0	0	0	0	0	0	0	0	0	0	0	0	0	0	0	0
714	114529	1.035	54.21	52.38	0.944	11.26	11.94	1.03	14.36	13.94	1.081	15.45	14.29	1.076	13.14	12.21	1.1376	46.8181	2	2	2	0	0	0	0	0	0	0	0	0	0	0	0	0	0	0	0	0	0	0	0	0	0	0	0	0	0	0	0
715	114530	0.783	36.49	46.64	0.771	7.87	10.21	0.796	9.81	12.33	0.773	9.3	12.03	0.788	9.51	12.07	1.1391	46.9732	2	2	1	0	0	1	0	0	0	0	0	0	0	0	0	0	0	0	0	0	0	0	0	0	0	0	0	0	0	0	0
716	114532	0.942	59.77	63.46	0.88	11.28	12.81	0.965	14.61	15.14	0.964	16.56	17.18	0.945	17.32	18.33	1.1223	41.0586	2	2	2	0	0	0	0	0	0	0	0	0	0	0	0	0	0	0	0	0	0	0	0	0	0	0	0	0	0	0	0
717	114539	1.015	54.68	53.87	0.892	10.71	12	0.989	13.15	13.3	1.041	14.73	14.15	1.117	16.09	14.41	1.1362	42.939	2	2	2	0	0	0	0	0	0	0	0	0	0	0	0	0	0	0	0	0	0	0	0	0	0	0	0	0	0	0	0
718	114540	0.997	61.05	61.26	0.872	12.33	14.15	0.971	14.45	14.89	1.085	15.75	14.51	1.046	18.51	17.71	1.1342	46.2134	2	2	2	0	0	0	0	0	0	0	0	0	0	0	0	0	0	0	0	0	0	0	0	0	0	0	0	0	0	0	0
719	114579	0.983	60.12	61.14	0.85	12.86	15.13	0.965	13.67	14.16	1.056	15.94	15.09	1.053	17.65	16.75	1.1318	44.6553	2	2	2	0	0	0	0	0	0	0	0	0	0	0	0	0	0	0	0	0	0	0	0	0	0	0	0	0	0	0	0
720	114585	0.839	40.12	47.83	0.876	9.69	11.06	0.897	10.04	11.19	0.846	10.77	12.73	0.748	9.61	12.85	1.131	44.6437	2	2	2	0	0	0	0	0	0	0	0	0	0	0	0	0	0	0	0	0	0	0	0	0	0	0	0	0	0	0	0
721	114586	0.85	39.97	47.03	0.876	9.98	11.39	0.825	8.52	10.32	0.835	11.32	13.56	0.864	10.16	11.75	1.1438	39.0502	2	1	2	0	1	0	0	0	0	0	0	0	0	0	0	12	1	0	0	0	0	0	0	0	0	0	0	0	0	0	0
722	114596	0.863	53.33	61.82	0.923	13.53	14.66	0.898	10.8	12.02	0.816	13.54	16.59	0.833	15.46	18.55	1.1313	43.3929	2	2	2	0	0	0	0	0	0	0	0	0	0	0	0	0	0	0	0	0	0	0	0	0	0	0	0	0	0	0	0
723	114626	1.081	56.65	52.42	1.001	11.98	11.98	1.117	14.4	12.9	1.112	15.9	14.29	1.085	14.37	13.25	1.1353	45.0297	2	2	1	0	0	1	0	0	0	0	0	0	0	0	0	0	0	0	0	0	0	0	0	0	0	0	0	0	0	0	0
724	114636	1.177	84.65	71.93	1.056	16.2	15.35	1.178	21.86	18.55	1.196	22.46	18.77	1.253	24.13	19.26	1.1345	41.4641	2	2	2	0	0	0	0	0	0	0	0	0	0	0	0	0	0	0	0	0	0	0	0	0	0	0	0	0	0	0	0
725	114637	1.335	68.38	51.24	1.232	13.87	11.26	1.346	18.24	13.55	1.383	17.35	12.55	1.363	18.92	13.88	1.13	41.3105	2	2	2	0	0	0	0	0	0	0	0	0	0	0	0	0	0	0	0	0	0	0	0	0	0	0	0	0	0	0	0
726	114643	1.073	63.5	59.17	0.907	9.72	10.72	1.036	17.1	16.5	1.157	18.73	16.18	1.139	17.96	15.77	1.1392	46.0437	2	2	2	0	0	0	0	0	0	0	0	0	0	0	0	0	0	0	0	0	0	0	0	0	0	0	0	0	0	0	0
727	114650	1.259	100.34	79.68	1.229	19.86	16.16	1.277	23.04	18.04	1.314	28.12	21.41	1.218	29.32	24.08	1.1416	39.8039	2	2	2	0	0	0	0	0	0	0	0	0	0	0	0	0	0	0	0	0	0	0	0	0	0	0	0	0	0	0	0
728	114663	1.042	62.48	59.93	1.002	13.25	13.22	1.066	15.07	14.14	1.101	17.28	15.69	1	16.88	16.87	1.134	42.3456	2	2	2	0	0	0	0	0	0	0	0	0	0	0	0	0	0	0	0	0	0	0	0	0	0	0	0	0	0	0	0
729	114664	1.147	77.07	67.2	1.066	15.45	14.49	1.191	18.06	15.16	1.162	20.44	17.59	1.158	23.12	19.96	1.1487	39.4058	2	2	2	0	0	0	0	0	0	0	0	0	0	0	0	0	0	0	0	0	0	0	0	0	0	0	0	0	0	0	0
730	114682	1.255	68.38	54.47	1.15	15.57	13.54	1.269	16.59	13.08	1.307	16.91	12.94	1.294	19.31	14.92	1.132	46.3941	2	2	2	0	0	0	0	0	0	0	0	0	0	0	0	0	0	0	0	0	0	0	0	0	0	0	0	0	0	0	0
731	114686	1.191	63.98	53.74	1.1	13.43	12.21	1.185	15.35	12.96	1.253	17.29	13.8	1.212	17.9	14.77	1.1265	45.8512	2	2	2	0	0	0	0	0	0	0	0	0	0	0	0	0	0	0	0	0	0	0	0	0	0	0	0	0	0	0	0
732	114698	1.132	86.13	76.08	1.093	18.67	17.08	1.07	21.31	19.91	1.155	23.9	20.69	1.21	22.25	18.4	1.1372	44.5911	2	2	2	0	0	0	0	0	0	0	0	0	0	0	0	0	0	0	0	0	0	0	0	0	0	0	0	0	0	0	0
733	114700	1.114	67.73	60.81	1.001	14.33	14.31	1.111	16.81	15.12	1.162	17.39	14.97	1.17	19.19	16.4	1.1427	44.8987	2	2	2	0	0	0	0	0	0	0	0	0	0	0	0	0	0	0	0	0	0	0	0	0	0	0	0	0	0	0	0
734	114708	1.169	46.04	39.38	1.176	19.72	16.77	1.351	23.19	17.17	1.289	25.17	19.52	1.164	26.32	22.61	1.1306	43.1404	2	2	2	0	0	0	0	0	0	0	0	0	0	0	0	0	0	0	0	0	0	0	0	0	0	0	0	0	0	0	0
735	114729	0.813	47.3	58.18	0.747	8.88	11.88	0.82	10.71	13.06	0.802	11.07	13.81	0.856	16.63	19.43	1.1325	46.905	2	2	2	0	0	0	0	0	0	0	0	0	0	0	0	0	0	0	0	0	0	0	0	0	0	0	0	0	0	0	0
736	114738	0.991	60.93	61.46	0.953	14.54	15.25	1.012	12.14	11.99	0.968	16.64	17.19	1.034	17.62	17.03	1.1437	40.911	2	2	2	0	0	0	0	0	0	0	0	0	0	0	0	0	0	0	0	0	0	0	0	0	0	0	0	0	0	0	0
737	114745	1.054	79.95	75.82	0.999	17.74	17.76	1.011	18.01	17.81	1.112	21.63	19.46	1.085	22.56	20.79	1.1436	40.507	2	2	2	0	0	0	0	0	0	0	0	0	0	0	0	0	0	0	0	0	0	0	0	0	0	0	0	0	0	0	0
738	114754	1.642	99.77	60.76	1.597	22.78	14.27	1.528	22.7	14.85	1.691	25.17	14.88	1.738	29.13	16.76	1.1253	39.8533	2	2	2	0	0	0	0	0	0	0	0	0	0	0	0	0	0	0	0	0	0	0	0	0	0	0	0	0	0	0	0
739	114769	1.186	76.33	64.33	1.074	15.18	14.13	1.142	17.72	15.52	1.283	20.37	15.88	1.227	23.06	18.79	1.1352	46.3827	2	2	2	0	0	0	0	0	0	0	0	0	0	0	0	0	0	0	0	0	0	0	0	0	0	0	0	0	0	0	0
740	114789	1.309	83.02	63.43	1.243	19.1	15.36	1.287	20.92	16.26	1.312	19.88	15.15	1.388	23.13	16.66	1.1196	40.2634	2	2	1	0	0	1	0	0	0	0	0	0	0	0	0	0	0	0	0	0	0	0	0	0	0	0	0	0	0	0	0
741	114793	0.846	54.1	63.93	0.801	11.31	14.11	0.808	13.07	16.17	0.886	14.66	16.54	0.88	15.06	17.11	1.1523	45.2552	2	2	2	0	0	0	0	0	0	0	0	0	0	0	0	0	0	0	0	0	0	0	0	0	0	0	0	0	0	0	0
742	114798	0.755	38.15	50.52	0.703	8.03	11.42	0.75	9.32	12.43	0.807	10.25	12.7	0.755	10.55	13.97	1.1494	44.2867	2	2	2	0	0	0	0	0	0	0	0	0	0	0	0	0	0	0	0	0	0	0	0	0	0	0	0	0	0	0	0
743	114799	0.933	57.46	61.58	0.949	15.79	16.65	0.916	15.34	16.75	0.897	13.47	15.02	0.978	12.86	13.15	1.13	44.8532	2	2	2	0	0	0	0	0	0	0	0	0	0	0	0	0	0	0	0	0	0	0	0	0	0	0	0	0	0	0	0
744	114826	0.92	54.65	59.41	0.75	9.06	12.07	0.862	11.6	13.47	1.006	16.51	16.41	1.001	17.48	17.47	1.1447	40.9361	2	2	2	0	0	0	0	0	0	0	0	0	0	0	0	0	0	0	0	0	0	0	0	0	0	0	0	0	0	0	0
745	114828	0.855	47.93	56.06	0.755	9.08	12.03	0.805	10.25	12.73	0.949	13.26	13.96	0.886	15.35	17.33	1.1347	46.4537	2	2	2	0	0	0	0	0	0	0	0	0	0	0	0	0	0	0	0	0	0	0	0	0	0	0	0	0	0	0	0
746	114831	1.519	103.99	68.46	1.37	22.07	16.12	1.496	21.87	14.62	1.551	27.92	18.01	1.63	32.13	19.71	1.1121	38.8146	2	2	2	0	0	0	0	0	0	0	0	0	0	0	0	0	0	0	0	0	0	0	0	0	0	0	0	0	0	0	0
747	114835	1.054	62.63	59.43	0.899	11.58	12.89	1.014	13.64	13.45	1.106	18.06	16.34	1.155	19.35	16.75	1.1383	46.3759	2	2	2	0	0	0	0	0	0	0	0	0	0	0	0	0	0	0	0	0	0	0	0	0	0	0	0	0	0	0	0
748	114842	0.921	50.74	55.12	0.789	9.56	12.11	0.91	10.99	12.08	0.973	14.06	14.45	0.979	16.14	16.48	1.1466	41.5383	2	2	2	0	0	0	0	0	0	0	0	0	0	0	0	0	0	0	0	0	0	0	0	0	0	0	0	0	0	0	0
749	114843	0.955	51.65	54.08	0.914	10.81	11.83	0.984	13.02	13.23	0.961	12.94	13.47	0.957	14.88	15.55	1.1287	42.7625	2	2	2	0	0	0	0	0	0	0	0	0	0	0	0	0	0	0	0	0	0	0	0	0	0	0	0	0	0	0	0
750	114861	1.069	59.15	55.33	1.005	11.74	11.67	1.06	13.46	12.69	1.057	14.81	14.02	1.13	19.14	16.95	1.1376	45.9325	2	2	2	0	0	0	0	0	0	0	0	0	0	0	0	0	0	0	0	0	0	0	0	0	0	0	0	0	0	0	0
751	114862	0.966	59.51	61.61	0.953	12.78	13.41	0.986	15.79	16.01	0.914	14.42	15.78	1.007	16.52	16.41	1.1441	39.9246	2	2	2	0	0	0	0	0	0	0	0	0	0	0	0	0	0	0	0	0	0	0	0	0	0	0	0	0	0	0	0
752	114863	1.074	62.69	58.35	0.983	12.69	12.91	1.102	14.46	13.11	1.123	17.71	15.78	1.078	17.82	16.54	1.14	43.1373	2	2	2	0	0	0	0	0	0	0	0	0	0	0	0	0	0	0	0	0	0	0	0	0	0	0	0	0	0	0	0
753	114867	1.16	71.03	61.24	1.143	16.95	14.82	1.203	17.73	14.74	1.172	17.47	14.91	1.126	18.88	16.77	1.1259	45.2712	2	2	2	0	0	0	0	0	0	0	0	0	0	0	0	0	0	0	0	0	0	0	0	0	0	0	0	0	0	0	0
754	114886	0.92	40.38	43.89	0.85	11.06	13.01	0.914	13.49	14.75	0.982	15.83	16.13	1.102	20.53	18.63	1.1324	46.1367	2	1	2	0	1	0	0	0	0	0	0	0	0	0	0	65	2	1	0	0	0	0	0	0	0	0	0	0	0	0	0
755	114894	1.066	62.65	58.76	0.957	12.57	13.14	1.049	14.9	14.2	1.14	17.32	15.2	1.102	17.87	16.21	1.1451	39.2904	2	2	2	0	0	0	0	0	0	0	0	0	0	0	0	0	0	0	0	0	0	0	0	0	0	0	0	0	0	0	0
756	114901	0.852	48.92	57.38	0.863	11.71	13.57	0.856	11.69	13.65	0.88	12.6	14.32	0.816	12.92	15.84	1.1448	40.9871	2	2	2	0	0	0	0	0	0	0	0	0	0	0	0	0	0	0	0	0	0	0	0	0	0	0	0	0	0	0	0
757	114903	0.957	51.95	54.27	0.906	11.43	12.62	0.947	11.86	12.52	0.973	15.09	15.51	0.997	13.57	13.62	1.1328	46.9439	2	2	2	0	0	0	0	0	0	0	0	0	0	0	0	0	0	0	0	0	0	0	0	0	0	0	0	0	0	0	0
758	114908	1.186	64.2	54.12	1.086	12.71	11.7	1.126	15.85	14.08	1.214	17.55	14.46	1.303	18.08	13.88	1.1376	40.4316	2	2	2	0	0	0	0	0	0	0	0	0	0	0	0	0	0	0	0	0	0	0	0	0	0	0	0	0	0	0	0
759	114913	1.136	63.92	56.27	1.036	12.23	11.81	1.157	15.09	13.05	1.166	16.56	14.2	1.164	20.03	17.21	1.1353	46.9859	2	2	2	0	0	0	0	0	0	0	0	0	0	0	0	0	0	0	0	0	0	0	0	0	0	0	0	0	0	0	0
760	114916	0.925	51	55.12	0.923	11.58	12.55	0.925	11.75	12.7	0.896	12.08	13.48	0.952	15.59	16.38	1.1325	45.171	2	1	2	0	1	0	0	0	0	0	0	0	0	0	0	45	1	0	0	0	0	0	0	0	0	0	0	0	0	0	0
761	114919	1.382	80.74	58.43	1.306	16.97	13	1.328	17.76	13.37	1.485	22.23	14.98	1.392	23.78	17.09	1.1387	42.2971	2	2	2	0	0	0	0	0	0	0	0	0	0	0	0	0	0	0	0	0	0	0	0	0	0	0	0	0	0	0	0
762	114924	1.063	71.71	67.43	0.992	13.17	13.28	1.058	15.53	14.68	1.072	20.94	19.53	1.106	22.06	19.94	1.1361	46.2874	2	2	2	0	0	0	0	0	0	0	0	0	0	0	0	0	0	0	0	0	0	0	0	0	0	0	0	0	0	0	0
763	114926	1.196	64.74	54.14	1.085	13.33	12.29	1.221	16.79	13.75	1.253	16.21	12.94	1.214	18.41	15.16	1.1307	45.2052	2	2	2	0	0	0	0	0	0	0	0	0	0	0	0	0	0	0	0	0	0	0	0	0	0	0	0	0	0	0	0
764	114927	1.219	70.2	57.6	1.058	13.36	12.63	1.202	15.43	12.84	1.277	18.64	14.6	1.298	22.77	17.54	1.1543	43.242	2	2	2	0	0	0	0	0	0	0	0	0	0	0	0	0	0	0	0	0	0	0	0	0	0	0	0	0	0	0	0
765	114934	1.147	69.17	60.32	1.038	13.8	13.29	1.108	16.46	14.86	1.204	19.37	16.09	1.215	19.54	16.09	1.134	45.82	2	2	2	0	0	0	0	0	0	0	0	0	0	0	0	0	0	0	0	0	0	0	0	0	0	0	0	0	0	0	0
766	114935	0.978	58.72	60.06	0.945	11.67	12.36	0.953	12.86	13.5	1.056	16.39	15.52	0.953	17.8	18.69	1.1402	42.9922	2	2	2	0	0	0	0	0	0	0	0	0	0	0	0	0	0	0	0	0	0	0	0	0	0	0	0	0	0	0	0
767	114941	0.977	54.98	56.27	0.935	11.23	12.01	0.92	11.66	12.67	1.046	15.69	15	0.989	16.4	16.59	1.1098	44.474	2	2	2	0	0	0	0	0	0	0	0	0	0	0	0	0	0	0	0	0	0	0	0	0	0	0	0	0	0	0	0
768	114958	1.228	86.56	70.48	1.124	20.45	18.2	1.177	21.29	18.08	1.264	20.38	16.12	1.352	24.44	18.07	1.1545	38.4883	2	2	2	0	0	0	0	0	0	0	0	0	0	0	0	0	0	0	0	0	0	0	0	0	0	0	0	0	0	0	0
769	114962	1.061	34.51	32.54	1.074	17.21	16.03	1.048	17.3	16.51	1.195	19.84	16.6	1.345	23.76	17.67	1.1241	44.316	2	1	2	0	3	0	0	0	0	0	0	0	0	0	0	35	1	0	40	1	0	55	2	3	0	0	0	0	0	0	0
770	114963	1.349	100.7	74.65	1.213	21.04	17.35	1.31	26.69	20.37	1.416	26.49	18.71	1.453	26.47	18.22	1.1473	42.0828	2	2	2	0	0	0	0	0	0	0	0	0	0	0	0	0	0	0	0	0	0	0	0	0	0	0	0	0	0	0	0
771	114965	0.784	41.23	52.56	0.773	9.25	11.96	0.788	9.46	12.01	0.784	11.07	14.11	0.791	11.45	14.48	1.1349	47.3585	2	2	2	0	0	0	0	0	0	0	0	0	0	0	0	0	0	0	0	0	0	0	0	0	0	0	0	0	0	0	0
772	114988	1.044	69.15	66.24	0.978	14.84	15.17	1.074	17.68	16.46	1.082	18.02	16.66	1.036	18.6	17.95	1.1528	41.7974	2	2	2	0	0	0	0	0	0	0	0	0	0	0	0	0	0	0	0	0	0	0	0	0	0	0	0	0	0	0	0
773	114989	1.16	90.55	78.05	1.163	18.74	16.12	1.217	24.23	19.91	1.165	24.02	20.62	1.101	23.55	21.4	1.1301	44.6417	2	2	2	0	0	0	0	0	0	0	0	0	0	0	0	0	0	0	0	0	0	0	0	0	0	0	0	0	0	0	0
774	114995	0.871	43.49	49.95	0.853	9.29	10.89	0.842	9.21	10.94	0.898	11.48	12.79	0.88	13.5	15.34	1.1492	39.5389	2	2	2	0	0	0	0	0	0	0	0	0	0	0	0	0	0	0	0	0	0	0	0	0	0	0	0	0	0	0	0
775	114996	0.898	43.03	47.94	0.818	8.08	9.88	0.902	10.14	11.24	0.937	11.71	12.49	0.915	13.11	14.33	1.1419	47.3352	2	2	2	0	0	0	0	0	0	0	0	0	0	0	0	0	0	0	0	0	0	0	0	0	0	0	0	0	0	0	0
776	115005	0.972	60.73	62.48	0.875	13.37	15.29	0.973	14.21	14.61	1.028	16.15	15.71	1.007	17	16.88	1.1413	41.2043	2	2	2	0	0	0	0	0	0	0	0	0	0	0	0	0	0	0	0	0	0	0	0	0	0	0	0	0	0	0	0
777	115007	0.885	45.73	51.66	0.788	8.2	10.41	0.883	12.26	13.88	0.901	13.07	14.51	0.95	12.2	12.85	1.1315	45.2521	2	2	2	0	0	0	0	0	0	0	0	0	0	0	0	0	0	0	0	0	0	0	0	0	0	0	0	0	0	0	0
778	115012	1.079	60.55	56.11	1.011	12.44	12.3	1.1	14.25	12.95	1.141	16.95	14.85	1.057	16.92	16.01	1.1493	40.7197	2	2	2	0	0	0	0	0	0	0	0	0	0	0	0	0	0	0	0	0	0	0	0	0	0	0	0	0	0	0	0
779	115013	1.105	74.63	67.53	1.079	17.08	15.82	1.092	17.43	15.96	1.176	19.59	16.66	1.077	20.54	19.08	1.1323	43.6394	2	1	2	0	6	0	0	0	0	0	0	0	0	0	0	28	1	0	29	1	0	29	1	0	40	1	0	56	2	2	57
780	115036	1.137	64.78	56.99	1.108	13.66	12.33	1.142	16.21	14.19	1.101	15.04	13.66	1.183	19.88	16.81	1.1467	42.1888	2	2	2	0	0	0	0	0	0	0	0	0	0	0	0	0	0	0	0	0	0	0	0	0	0	0	0	0	0	0	0
781	115039	1.195	80.35	67.25	1.14	16.12	14.14	1.197	20.16	16.85	1.181	20.36	17.24	1.246	23.71	19.02	1.1507	41.7371	2	2	2	0	0	0	0	0	0	0	0	0	0	0	0	0	0	0	0	0	0	0	0	0	0	0	0	0	0	0	0
782	115046	1.091	62.36	57.16	0.99	12.75	12.88	1.096	13.76	12.56	1.172	16.91	14.43	1.096	18.94	17.28	1.1416	40.0933	2	2	2	0	0	0	0	0	0	0	0	0	0	0	0	0	0	0	0	0	0	0	0	0	0	0	0	0	0	0	0
783	115047	1.054	64.89	61.57	0.99	14.14	14.29	1.098	17.12	15.6	1.102	16.78	15.23	1.024	16.85	16.45	1.1481	40.8199	2	2	2	0	0	0	0	0	0	0	0	0	0	0	0	0	0	0	0	0	0	0	0	0	0	0	0	0	0	0	0
784	115056	1.091	83.88	76.9	1.015	17.48	17.23	1.153	20.37	17.66	1.161	23.9	20.59	1.033	22.13	21.42	1.1326	45.4108	2	2	2	0	0	0	0	0	0	0	0	0	0	0	0	0	0	0	0	0	0	0	0	0	0	0	0	0	0	0	0
785	115058	0.893	63.62	71.28	0.822	13.66	16.62	0.902	15.29	16.97	0.901	16.75	18.58	0.938	17.92	19.11	1.137	47.6052	2	2	2	0	0	0	0	0	0	0	0	0	0	0	0	0	0	0	0	0	0	0	0	0	0	0	0	0	0	0	0
786	115063	1.267	78.17	61.69	1.19	17.78	14.94	1.26	17.49	13.89	1.32	22	16.66	1.29	20.9	16.2	1.1376	36.567	2	2	2	0	0	0	0	0	0	0	0	0	0	0	0	0	0	0	0	0	0	0	0	0	0	0	0	0	0	0	0
787	115066	1.017	75.46	74.22	0.862	14.76	17.12	0.974	17.26	17.72	1.063	20.96	19.72	1.144	22.48	19.65	1.144	38.433	2	2	2	0	0	0	0	0	0	0	0	0	0	0	0	0	0	0	0	0	0	0	0	0	0	0	0	0	0	0	0
788	115073	0.631	31.8	50.39	0.65	8	12.31	0.574	7.19	12.52	0.652	9.52	14.61	0.648	7.09	10.95	1.1545	45.6657	2	2	2	0	0	0	0	0	0	0	0	0	0	0	0	0	0	0	0	0	0	0	0	0	0	0	0	0	0	0	0
789	115082	1.048	56.06	53.51	0.961	11.29	11.75	1.04	12.65	12.17	1.078	14.42	13.38	1.092	17.69	16.2	1.1551	43.7942	2	2	2	0	0	0	0	0	0	0	0	0	0	0	0	0	0	0	0	0	0	0	0	0	0	0	0	0	0	0	0
790	115091	1.147	70.54	61.52	1.097	14.3	13.03	1.071	16.49	15.4	1.16	17.81	15.35	1.237	21.95	17.74	1.1263	46.5749	2	2	2	0	0	0	0	0	0	0	0	0	0	0	0	0	0	0	0	0	0	0	0	0	0	0	0	0	0	0	0
791	115095	0.835	51.04	61.16	0.835	11.38	13.63	0.809	11.88	14.68	0.842	13.2	15.68	0.849	14.58	17.17	1.1505	41.3015	2	2	1	0	0	1	0	0	0	0	0	0	0	0	0	0	0	0	0	0	0	0	0	0	0	0	0	0	0	0	0
792	115096	1.298	89.17	68.7	1.162	17.47	15.03	1.263	20.48	16.21	1.341	25.38	18.93	1.395	25.84	18.52	1.1342	42.1929	2	2	2	0	0	0	0	0	0	0	0	0	0	0	0	0	0	0	0	0	0	0	0	0	0	0	0	0	0	0	0
793	115097	0.913	53.84	59	0.94	12.63	13.44	0.904	12.67	14.01	0.906	13.69	15.11	0.904	14.86	16.45	1.1283	49.1358	2	2	2	0	0	0	0	0	0	0	0	0	0	0	0	0	0	0	0	0	0	0	0	0	0	0	0	0	0	0	0
794	115100	1.219	78.86	64.67	1.249	18.22	14.59	1.296	19.57	15.1	1.202	17.7	14.73	1.154	23.37	20.25	1.1534	39.7095	2	2	2	0	0	0	0	0	0	0	0	0	0	0	0	0	0	0	0	0	0	0	0	0	0	0	0	0	0	0	0
795	115133	1.12	67.91	60.65	1.188	14.75	12.42	1.141	16.3	14.29	1.119	18.44	16.48	1.054	18.42	17.47	1.131	43.7805	2	2	2	0	0	0	0	0	0	0	0	0	0	0	0	0	0	0	0	0	0	0	0	0	0	0	0	0	0	0	0
796	115142	1.058	64.65	61.09	0.962	12.08	12.56	1.112	14.81	13.31	1.172	17.84	15.21	0.997	19.94	20.01	1.1544	41.9573	2	2	2	0	0	0	0	0	0	0	0	0	0	0	0	0	0	0	0	0	0	0	0	0	0	0	0	0	0	0	0
797	115144	0.954	67.76	71.03	0.894	14.19	15.88	0.907	16.11	17.76	0.99	18.43	18.61	1.013	19.02	18.78	1.1301	45.7337	2	2	2	0	0	0	0	0	0	0	0	0	0	0	0	0	0	0	0	0	0	0	0	0	0	0	0	0	0	0	0
798	115146	1.033	74.47	72.07	0.905	15.66	17.31	1.005	15.15	15.07	1.069	20.66	19.33	1.13	23	20.35	1.1368	44.2268	2	2	2	0	0	0	0	0	0	0	0	0	0	0	0	0	0	0	0	0	0	0	0	0	0	0	0	0	0	0	0
799	115147	0.635	36.51	57.48	0.635	8.67	13.65	0.665	9.69	14.58	0.645	9.69	15.02	0.594	8.46	14.23	1.1393	46.0816	2	2	2	0	0	0	0	0	0	0	0	0	0	0	0	0	0	0	0	0	0	0	0	0	0	0	0	0	0	0	0
800	115154	0.807	50.98	63.19	0.807	12.09	14.99	0.805	11.77	14.62	0.825	12.75	15.46	0.793	14.36	18.13	1.1528	41.0434	2	2	2	0	0	0	0	0	0	0	0	0	0	0	0	0	0	0	0	0	0	0	0	0	0	0	0	0	0	0	0
801	115156	1.047	64.62	61.73	1.022	13.51	13.21	1.047	15.54	14.85	1.044	17.13	16.41	1.068	18.45	17.27	1.1519	43.0683	2	2	2	0	0	0	0	0	0	0	0	0	0	0	0	0	0	0	0	0	0	0	0	0	0	0	0	0	0	0	0
802	115159	0.931	61.14	65.65	0.809	11.56	14.29	0.889	13.78	15.5	0.986	15.49	15.71	1.008	20.31	20.15	1.1555	41.7417	2	2	2	0	0	0	0	0	0	0	0	0	0	0	0	0	0	0	0	0	0	0	0	0	0	0	0	0	0	0	0
803	115160	0.922	69.28	75.15	0.954	17.08	17.91	0.907	16.58	18.29	0.904	17.59	19.47	0.926	18.04	19.48	1.1257	46.2572	2	2	2	0	0	0	0	0	0	0	0	0	0	0	0	0	0	0	0	0	0	0	0	0	0	0	0	0	0	0	0
804	115173	0.812	51.77	63.73	0.667	9.23	13.85	0.775	12.33	15.9	0.842	13.23	15.71	0.929	16.97	18.27	1.1311	45.8386	2	2	2	0	0	0	0	0	0	0	0	0	0	0	0	0	0	0	0	0	0	0	0	0	0	0	0	0	0	0	0
805	115185	1.023	54.86	53.65	0.976	12.06	12.35	1.046	12.4	11.86	1.089	14.99	13.77	0.983	15.4	15.67	1.1521	42.4535	2	2	2	0	0	0	0	0	0	0	0	0	0	0	0	0	0	0	0	0	0	0	0	0	0	0	0	0	0	0	0
806	115187	0.951	61.2	64.37	0.962	15.34	15.95	0.968	14.11	14.57	0.926	16.66	18	0.952	15.09	15.86	1.1407	44.9016	2	2	2	0	0	0	0	0	0	0	0	0	0	0	0	0	0	0	0	0	0	0	0	0	0	0	0	0	0	0	0
807	115192	1.037	74.09	71.43	1.035	17.15	16.58	1.065	18.44	17.32	1.084	19.48	17.97	0.973	19.02	19.55	1.1389	44.2438	2	2	2	0	0	0	0	0	0	0	0	0	0	0	0	0	0	0	0	0	0	0	0	0	0	0	0	0	0	0	0
808	115202	0.864	52.2	60.4	0.77	10.6	13.78	0.882	12.39	14.04	0.942	14.71	15.62	0.855	14.5	16.97	1.1384	47.5208	2	2	2	0	0	0	0	0	0	0	0	0	0	0	0	0	0	0	0	0	0	0	0	0	0	0	0	0	0	0	0
809	115203	1.045	65.87	63.06	1.001	13.05	13.04	1.045	15.09	14.43	1.058	16.88	15.96	1.062	20.85	19.63	1.1452	40.2388	2	2	2	0	0	0	0	0	0	0	0	0	0	0	0	0	0	0	0	0	0	0	0	0	0	0	0	0	0	0	0
810	115210	1.191	86.51	72.62	1.219	17.69	14.51	1.246	24.46	19.63	1.189	21.95	18.46	1.119	22.41	20.02	1.1489	38.5	2	2	2	0	0	0	0	0	0	0	0	0	0	0	0	0	0	0	0	0	0	0	0	0	0	0	0	0	0	0	0
811	115215	1.027	57.13	55.63	1.025	12.52	12.22	1.088	13.05	11.99	1.061	14.15	13.34	0.963	17.41	18.08	1.1276	49.0026	2	1	2	0	1	0	0	0	0	0	0	0	0	0	0	45	1	0	0	0	0	0	0	0	0	0	0	0	0	0	0
812	115225	0.878	51.29	58.41	0.836	11.5	13.75	0.913	12.66	13.87	0.882	13.77	15.61	0.881	13.37	15.18	1.127	44.9058	1	1	2	1	1	0	35	1	0	0	0	0	0	0	0	56	2	2	0	0	0	0	0	0	0	0	0	0	0	0	0
813	115232	1.17	80.44	68.78	1.113	17.05	15.32	1.187	19.97	16.82	1.166	22.4	19.22	1.207	21.02	17.41	1.1339	43.7137	2	2	2	0	0	0	0	0	0	0	0	0	0	0	0	0	0	0	0	0	0	0	0	0	0	0	0	0	0	0	0
814	115236	1.111	89.1	80.19	1.036	18.99	18.33	1.131	21.01	18.57	1.159	23.22	20.04	1.113	25.88	23.25	1.1366	38.9548	2	2	2	0	0	0	0	0	0	0	0	0	0	0	0	0	0	0	0	0	0	0	0	0	0	0	0	0	0	0	0
815	115242	0.995	56.98	57.25	0.921	10.87	11.8	1.014	14.38	14.18	1.044	16.01	15.33	0.987	15.73	15.94	1.1127	45.3048	2	2	2	0	0	0	0	0	0	0	0	0	0	0	0	0	0	0	0	0	0	0	0	0	0	0	0	0	0	0	0
816	115247	0.755	38.3	50.71	0.72	7.46	10.37	0.78	8.61	11.03	0.734	9.48	12.9	0.777	12.75	16.41	1.1332	45.7619	2	2	2	0	0	0	0	0	0	0	0	0	0	0	0	0	0	0	0	0	0	0	0	0	0	0	0	0	0	0	0
817	115249	0.879	46.87	53.3	0.914	11.4	12.48	0.904	11.59	12.82	0.871	12.22	14.03	0.834	11.66	13.97	1.1388	42.6946	2	2	2	0	0	0	0	0	0	0	0	0	0	0	0	0	0	0	0	0	0	0	0	0	0	0	0	0	0	0	0
818	115288	0.835	38.97	46.65	0.755	8.34	11.04	0.834	9.2	11.03	0.894	11.45	12.81	0.848	9.97	11.76	1.1291	42.8962	2	2	2	0	0	0	0	0	0	0	0	0	0	0	0	0	0	0	0	0	0	0	0	0	0	0	0	0	0	0	0
819	115292	1.162	81.27	69.91	1.096	18	16.43	1.213	21.12	17.41	1.162	20.16	17.35	1.174	21.99	18.72	1.1323	45.1383	2	2	2	0	0	0	0	0	0	0	0	0	0	0	0	0	0	0	0	0	0	0	0	0	0	0	0	0	0	0	0
820	115305	0.92	44.64	48.54	0.937	11.58	12.36	0.9	10.6	11.78	0.973	12	12.33	0.866	10.45	12.07	1.1512	41.6407	2	2	2	0	0	0	0	0	0	0	0	0	0	0	0	0	0	0	0	0	0	0	0	0	0	0	0	0	0	0	0
821	115309	1.012	53.81	53.18	0.912	10.29	11.29	1.013	12.8	12.63	1.079	14.24	13.2	1.027	16.48	16.06	1.1449	42.3569	2	2	2	0	0	0	0	0	0	0	0	0	0	0	0	0	0	0	0	0	0	0	0	0	0	0	0	0	0	0	0
822	115314	1.157	56.78	49.07	1.126	11.71	10.4	1.125	13.27	11.8	1.158	13.98	12.07	1.204	17.82	14.8	1.1498	40.7146	2	2	2	0	0	0	0	0	0	0	0	0	0	0	0	0	0	0	0	0	0	0	0	0	0	0	0	0	0	0	0
823	115334	0.982	74.06	75.43	0.86	14.11	16.42	0.913	16.97	18.58	1.015	19.4	19.13	1.107	23.58	21.31	1.1516	40.8964	2	2	2	0	0	0	0	0	0	0	0	0	0	0	0	0	0	0	0	0	0	0	0	0	0	0	0	0	0	0	0
824	115341	0.627	33.09	52.78	0.641	7.15	11.15	0.578	7.09	12.26	0.609	8.89	14.61	0.675	9.96	14.76	1.1352	46.9405	2	2	2	0	0	0	0	0	0	0	0	0	0	0	0	0	0	0	0	0	0	0	0	0	0	0	0	0	0	0	0
825	115358	1	45.82	45.83	0.902	8.93	9.9	1.008	12.44	12.35	1.049	10.77	10.27	1.028	13.68	13.31	1.1324	48.4405	2	1	2	0	2	0	0	0	0	0	0	0	0	0	0	75	2	1	79	2	1	0	0	0	0	0	0	0	0	0	0
826	115371	1.363	75.74	55.55	1.248	16.25	13.02	1.283	15.59	12.15	1.433	20.4	14.23	1.455	23.49	16.15	1.1369	45.4973	2	2	2	0	0	0	0	0	0	0	0	0	0	0	0	0	0	0	0	0	0	0	0	0	0	0	0	0	0	0	0
827	115383	1.116	69.69	62.42	1.018	14.26	14	1.12	16.33	14.58	1.121	18.05	16.1	1.187	21.05	17.74	1.1308	43.1604	2	2	2	0	0	0	0	0	0	0	0	0	0	0	0	0	0	0	0	0	0	0	0	0	0	0	0	0	0	0	0
828	115393	0.634	41.33	65.19	0.565	8.29	14.68	0.606	9.53	15.71	0.628	10.49	16.69	0.719	13.02	18.11	1.1358	46.959	2	2	2	0	0	0	0	0	0	0	0	0	0	0	0	0	0	0	0	0	0	0	0	0	0	0	0	0	0	0	0
829	115426	0.877	48.31	55.1	0.754	10.34	13.72	0.788	10.91	13.85	0.94	12.77	13.59	1.025	14.3	13.95	1.1549	46.1659	2	2	2	0	0	0	0	0	0	0	0	0	0	0	0	0	0	0	0	0	0	0	0	0	0	0	0	0	0	0	0
830	115428	1.029	69.08	67.11	1.007	15.49	15.38	1.021	16.09	15.76	1.06	18.72	17.67	1.026	18.77	18.3	1.1384	40.3376	2	2	2	0	0	0	0	0	0	0	0	0	0	0	0	0	0	0	0	0	0	0	0	0	0	0	0	0	0	0	0
831	115437	0.943	60.34	64.01	0.995	14.76	14.83	0.946	14.5	15.33	0.952	16	16.81	0.885	15.08	17.04	1.1349	43.1707	2	2	2	0	0	0	0	0	0	0	0	0	0	0	0	0	0	0	0	0	0	0	0	0	0	0	0	0	0	0	0
832	115440	0.79	36.77	46.57	0.734	8.04	10.96	0.726	8.63	11.88	0.786	8.75	11.14	0.901	11.34	12.59	1.1354	47.1751	2	1	2	0	1	0	0	0	0	0	0	0	0	0	0	80	2	1	0	0	0	0	0	0	0	0	0	0	0	0	0
833	115446	0.931	56.33	60.53	0.921	12.16	13.2	0.89	12.4	13.94	0.957	14.6	15.25	0.947	17.16	18.14	1.1482	42.4716	2	2	2	0	0	0	0	0	0	0	0	0	0	0	0	0	0	0	0	0	0	0	0	0	0	0	0	0	0	0	0
834	115454	0.698	39.72	56.92	0.719	9	12.51	0.712	10.4	14.61	0.68	9.86	14.5	0.685	10.47	15.3	1.151	42.0389	2	2	2	0	0	0	0	0	0	0	0	0	0	0	0	0	0	0	0	0	0	0	0	0	0	0	0	0	0	0	0
835	115458	0.895	42.02	46.98	0.812	8.59	10.58	0.817	8.69	10.63	0.933	12.11	12.98	0.989	12.64	12.78	1.1572	44.2734	2	2	2	0	0	0	0	0	0	0	0	0	0	0	0	0	0	0	0	0	0	0	0	0	0	0	0	0	0	0	0
836	115468	1.046	75.91	72.59	0.931	15.21	16.33	0.985	18.09	18.37	1.103	20.45	18.55	1.146	22.16	19.34	1.1283	42.5735	2	2	2	0	0	0	0	0	0	0	0	0	0	0	0	0	0	0	0	0	0	0	0	0	0	0	0	0	0	0	0
837	115474	0.959	58.19	60.68	0.886	12.06	13.61	0.933	13.07	14.01	0.986	15.57	15.8	1.013	17.49	17.26	1.135	46.639	2	2	2	0	0	0	0	0	0	0	0	0	0	0	0	0	0	0	0	0	0	0	0	0	0	0	0	0	0	0	0
838	115479	0.969	52.49	54.15	0.901	10.59	11.75	0.888	11.23	12.65	1.007	14.1	14	1.051	16.57	15.76	1.1483	42.456	2	2	2	0	0	0	0	0	0	0	0	0	0	0	0	0	0	0	0	0	0	0	0	0	0	0	0	0	0	0	0
839	115485	1.468	87.09	59.31	1.401	16.29	11.62	1.546	22.12	14.31	1.444	22.61	15.65	1.471	26.08	17.72	1.1409	43.4601	2	2	2	0	0	0	0	0	0	0	0	0	0	0	0	0	0	0	0	0	0	0	0	0	0	0	0	0	0	0	0
840	115489	1.132	71.69	63.35	1.012	14.07	13.9	1.114	16.28	14.61	1.199	19.74	16.47	1.176	21.61	18.37	1.1349	46.3731	2	2	2	0	0	0	0	0	0	0	0	0	0	0	0	0	0	0	0	0	0	0	0	0	0	0	0	0	0	0	0
841	115490	1.198	85.85	71.65	1.071	16.13	15.05	1.192	18.46	15.49	1.269	21.49	16.93	1.232	29.77	24.17	1.1316	44.9484	2	2	2	0	0	0	0	0	0	0	0	0	0	0	0	0	0	0	0	0	0	0	0	0	0	0	0	0	0	0	0
842	115493	1.382	86.85	62.86	1.288	18.91	14.69	1.394	20.2	14.49	1.418	22.83	16.1	1.417	24.91	17.58	1.1437	38.2031	2	2	1	0	0	1	0	0	0	0	0	0	0	0	0	0	0	0	0	0	0	0	0	0	0	0	0	0	0	0	0
843	115494	1.216	77.93	64.08	1.196	16.91	14.14	1.172	18.67	15.93	1.241	20.04	16.15	1.249	22.31	17.85	1.1259	41.3219	2	2	2	0	0	0	0	0	0	0	0	0	0	0	0	0	0	0	0	0	0	0	0	0	0	0	0	0	0	0	0
844	115518	0.938	56.46	60.17	0.88	11.36	12.92	0.921	13.1	14.22	0.934	13.42	14.37	0.996	18.58	18.66	1.1351	42.7197	2	2	2	0	0	0	0	0	0	0	0	0	0	0	0	0	0	0	0	0	0	0	0	0	0	0	0	0	0	0	0
845	115524	1.028	66.43	64.63	0.984	13.52	13.74	1.014	15.95	15.73	1.063	19.66	18.5	1.039	17.31	16.66	1.1296	41.7674	2	2	2	0	0	0	0	0	0	0	0	0	0	0	0	0	0	0	0	0	0	0	0	0	0	0	0	0	0	0	0
846	115547	0.544	29.64	54.44	0.597	7.71	12.92	0.561	7.01	12.5	0.549	7.6	13.84	0.482	7.31	15.18	1.1372	38.6562	2	2	2	0	0	0	0	0	0	0	0	0	0	0	0	0	0	0	0	0	0	0	0	0	0	0	0	0	0	0	0
847	115560	0.999	55.82	55.85	0.936	10.44	11.16	1.018	13.45	13.21	1.029	15.47	15.04	1.001	16.45	16.44	1.1294	43.7898	2	2	2	0	0	0	0	0	0	0	0	0	0	0	0	0	0	0	0	0	0	0	0	0	0	0	0	0	0	0	0
848	115570	0.955	66.39	69.51	0.881	16.16	18.34	0.912	12.44	13.64	0.996	15.77	15.84	1.015	22.01	21.69	1.1347	44.2285	2	2	2	0	0	0	0	0	0	0	0	0	0	0	0	0	0	0	0	0	0	0	0	0	0	0	0	0	0	0	0
849	115583	1.181	56.68	48	1.105	15.69	14.2	1.282	22.36	17.45	1.232	19.38	15.73	1.196	21.6	18.07	1.1335	41.5409	2	2	2	0	0	0	0	0	0	0	0	0	0	0	0	0	0	0	0	0	0	0	0	0	0	0	0	0	0	0	0
850	115587	0.996	54.63	54.86	0.866	11.51	13.29	0.951	12.28	12.91	1.047	15.59	14.89	1.107	15.25	13.78	1.1408	46.9126	2	2	2	0	0	0	0	0	0	0	0	0	0	0	0	0	0	0	0	0	0	0	0	0	0	0	0	0	0	0	0
851	115591	0.847	60.05	70.85	0.84	13.6	16.19	0.834	14.22	17.05	0.914	16.96	18.56	0.801	15.27	19.05	1.1266	44.1858	2	1	2	0	1	0	0	0	0	0	0	0	0	0	0	22	1	0	0	0	0	0	0	0	0	0	0	0	0	0	0
852	115592	0.998	74.5	74.64	0.982	14.75	15.01	0.948	18.08	19.08	1.007	20.96	20.82	1.05	20.7	19.72	1.1355	44.0594	2	2	2	0	0	0	0	0	0	0	0	0	0	0	0	0	0	0	0	0	0	0	0	0	0	0	0	0	0	0	0
853	115603	0.957	61.15	63.86	0.83	11.42	13.75	0.909	13.36	14.69	0.997	17.04	17.09	1.055	19.33	18.33	1.1352	45.3362	2	2	2	0	0	0	0	0	0	0	0	0	0	0	0	0	0	0	0	0	0	0	0	0	0	0	0	0	0	0	0
854	115604	1.005	64.95	64.63	0.955	14.13	14.8	0.988	15.71	15.9	1.017	17.19	16.9	1.053	17.93	17.02	1.1348	42.1113	2	2	2	0	0	0	0	0	0	0	0	0	0	0	0	0	0	0	0	0	0	0	0	0	0	0	0	0	0	0	0
855	115608	1.227	82.72	67.44	1.095	16.19	14.79	1.113	16.63	14.94	1.216	20.88	17.17	1.413	29.02	20.54	1.1352	47.4783	2	2	2	0	0	0	0	0	0	0	0	0	0	0	0	0	0	0	0	0	0	0	0	0	0	0	0	0	0	0	0
856	115611	1.046	56.99	54.51	0.996	12.43	12.48	1.045	12.46	11.93	1.066	16.22	15.21	1.066	15.88	14.9	1.125	43.6354	2	2	2	0	0	0	0	0	0	0	0	0	0	0	0	0	0	0	0	0	0	0	0	0	0	0	0	0	0	0	0
857	115621	0.958	54.02	56.37	0.915	11.7	12.79	0.96	13.77	14.35	1.034	14.56	14.08	0.923	13.99	15.16	1.1309	50.9947	2	2	2	0	0	0	0	0	0	0	0	0	0	0	0	0	0	0	0	0	0	0	0	0	0	0	0	0	0	0	0
858	115629	0.887	60.96	68.71	0.893	14.22	15.93	0.932	15.38	16.5	0.88	16.19	18.4	0.849	15.17	17.87	1.131	44.7906	2	2	2	0	0	0	0	0	0	0	0	0	0	0	0	0	0	0	0	0	0	0	0	0	0	0	0	0	0	0	0
859	115636	1.215	61.28	50.45	1.261	19.23	15.26	1.196	20.32	16.98	1.194	21.73	18.2	1.335	26.67	19.98	1.1273	46.8881	2	2	2	0	0	0	0	0	0	0	0	0	0	0	0	0	0	0	0	0	0	0	0	0	0	0	0	0	0	0	0
860	115639	1.003	59.61	59.4	0.94	11.44	12.18	0.967	12.88	13.32	1.053	16.62	15.78	1.03	18.66	18.12	1.1367	46.8355	2	1	2	0	1	0	0	0	0	0	0	0	0	0	0	28	1	0	0	0	0	0	0	0	0	0	0	0	0	0	0
861	115644	0.972	52.97	54.48	1.019	10.94	10.73	1.008	11.93	11.83	0.924	13.96	15.11	0.961	16.15	16.81	1.1234	41.4759	2	2	2	0	0	0	0	0	0	0	0	0	0	0	0	0	0	0	0	0	0	0	0	0	0	0	0	0	0	0	0
862	115647	0.857	45.84	53.48	0.813	9.55	11.75	0.836	11.21	13.42	0.909	11.94	13.14	0.866	13.13	15.17	1.1289	45.821	2	2	2	0	0	0	0	0	0	0	0	0	0	0	0	0	0	0	0	0	0	0	0	0	0	0	0	0	0	0	0
863	115662	1.172	80.01	68.3	1.15	18.06	15.7	1.201	18.53	15.43	1.128	18.33	16.24	1.199	25.09	20.93	1.162	44.4493	2	2	2	0	0	0	0	0	0	0	0	0	0	0	0	0	0	0	0	0	0	0	0	0	0	0	0	0	0	0	0
864	115666	1.341	40.81	30.44	1.309	19.27	14.72	1.371	21.55	15.72	1.88	33.26	17.69	2.85	59.77	20.97	1.1337	38.3257	2	1	2	0	1	0	0	0	0	0	0	0	0	0	0	19	1	0	0	0	0	0	0	0	0	0	0	0	0	0	0
865	115669	0.986	52.74	53.49	0.916	11.04	12.06	0.969	12.8	13.21	1.041	14.56	13.98	1.007	14.34	14.23	1.1243	43.0713	2	1	2	0	1	0	0	0	0	0	0	0	0	0	0	56	2	1	0	0	0	0	0	0	0	0	0	0	0	0	0
866	115671	1.2	69.48	57.89	1.106	14.2	12.83	1.142	15.46	13.54	1.266	17.52	13.84	1.261	22.3	17.69	1.1447	41.6338	2	1	1	0	1	1	0	0	0	0	0	0	0	0	0	66	2	9	0	0	0	0	0	0	0	0	0	0	0	0	0
867	115676	0.753	41.97	55.72	0.702	9.59	13.66	0.745	9.99	13.41	0.786	10.17	12.95	0.778	12.22	15.7	1.1339	43.7771	2	2	2	0	0	0	0	0	0	0	0	0	0	0	0	0	0	0	0	0	0	0	0	0	0	0	0	0	0	0	0
868	115683	1.014	58.5	57.7	0.901	11.52	12.79	1.023	14.17	13.85	1.067	15.24	14.28	1.047	17.57	16.78	1.1567	43.9472	2	2	2	0	0	0	0	0	0	0	0	0	0	0	0	0	0	0	0	0	0	0	0	0	0	0	0	0	0	0	0
869	115711	0.981	59.54	60.71	0.854	11.44	13.4	0.931	13.17	14.14	1.016	16.27	16	1.088	18.67	17.17	1.1367	44.8701	2	2	2	0	0	0	0	0	0	0	0	0	0	0	0	0	0	0	0	0	0	0	0	0	0	0	0	0	0	0	0
870	115714	1.055	81.2	76.97	0.954	16.54	17.34	1.043	19.73	18.92	1.065	20.17	18.94	1.137	24.75	21.78	1.1299	44.3543	2	2	2	0	0	0	0	0	0	0	0	0	0	0	0	0	0	0	0	0	0	0	0	0	0	0	0	0	0	0	0
871	115715	1.076	81.71	75.93	1.065	17.63	16.56	1.136	21.94	19.31	1.053	19.65	18.65	1.051	22.5	21.41	1.1445	38.2049	2	2	2	0	0	0	0	0	0	0	0	0	0	0	0	0	0	0	0	0	0	0	0	0	0	0	0	0	0	0	0
872	115727	0.922	44.89	48.7	0.861	10.65	12.37	0.901	10.14	11.25	0.998	12.43	12.45	0.925	11.67	12.63	1.1509	43.2097	2	2	2	0	0	0	0	0	0	0	0	0	0	0	0	0	0	0	0	0	0	0	0	0	0	0	0	0	0	0	0
873	115736	1.08	59.93	55.48	0.932	11.38	12.21	0.993	13.51	13.62	1.163	16.76	14.41	1.199	18.27	15.24	1.1396	44.9961	2	2	2	0	0	0	0	0	0	0	0	0	0	0	0	0	0	0	0	0	0	0	0	0	0	0	0	0	0	0	0
874	115739	1.198	84.01	70.11	1.145	17.5	15.29	1.153	18.55	16.09	1.206	23.28	19.3	1.269	24.68	19.44	1.1291	43.5788	2	2	2	0	0	0	0	0	0	0	0	0	0	0	0	0	0	0	0	0	0	0	0	0	0	0	0	0	0	0	0
875	115743	0.792	39.56	49.96	0.752	7.74	10.3	0.737	7.65	10.38	0.819	10.35	12.65	0.83	13.81	16.63	1.1473	42.5163	2	2	2	0	0	0	0	0	0	0	0	0	0	0	0	0	0	0	0	0	0	0	0	0	0	0	0	0	0	0	0
876	115746	1.175	70.8	60.27	1.069	14.86	13.91	1.125	16.36	14.55	1.269	19.74	15.56	1.221	19.84	16.25	1.1289	47.8783	2	2	2	0	0	0	0	0	0	0	0	0	0	0	0	0	0	0	0	0	0	0	0	0	0	0	0	0	0	0	0
877	115750	1.185	78.07	65.89	1.137	17.27	15.19	1.159	18.63	16.08	1.221	20.24	16.57	1.215	21.93	18.04	1.135	45.6195	2	2	2	0	0	0	0	0	0	0	0	0	0	0	0	0	0	0	0	0	0	0	0	0	0	0	0	0	0	0	0
878	115751	1.006	50.69	50.36	1.023	12.54	12.26	1.012	9.9	9.78	1.047	14.11	13.48	0.952	14.14	14.85	1.127	48.8685	2	2	2	0	0	0	0	0	0	0	0	0	0	0	0	0	0	0	0	0	0	0	0	0	0	0	0	0	0	0	0
879	115752	0.879	13.52	15.39	0.879	13.52	15.39	1.121	17.13	15.28	1.112	18.43	16.57	1.116	22.81	20.43	1.1334	47.0799	2	2	2	0	0	0	0	0	0	0	0	0	0	0	0	0	0	0	0	0	0	0	0	0	0	0	0	0	0	0	0
880	115759	0.956	48.93	51.17	0.946	10.86	11.47	0.971	11.35	11.69	0.93	12.53	13.48	0.976	14.19	14.54	1.1495	44.7634	2	2	2	0	0	0	0	0	0	0	0	0	0	0	0	0	0	0	0	0	0	0	0	0	0	0	0	0	0	0	0
881	115778	0.858	45.96	53.59	0.862	10.83	12.57	0.852	10.26	12.04	0.863	11.43	13.24	0.854	13.44	15.74	1.1312	45.657	2	1	2	0	1	0	0	0	0	0	0	0	0	0	0	57	2	1	0	0	0	0	0	0	0	0	0	0	0	0	0
882	115788	1.14	69.88	61.28	1.021	12.93	12.66	1.121	15.98	14.26	1.226	19.78	16.14	1.163	21.18	18.22	1.1398	47.2382	2	2	2	0	0	0	0	0	0	0	0	0	0	0	0	0	0	0	0	0	0	0	0	0	0	0	0	0	0	0	0
883	115791	1.415	105.14	74.31	1.326	21.2	15.99	1.383	24.93	18.03	1.483	26.97	18.19	1.449	32.03	22.1	1.1368	42.1969	2	2	2	0	0	0	0	0	0	0	0	0	0	0	0	0	0	0	0	0	0	0	0	0	0	0	0	0	0	0	0
884	115807	1.202	87.4	72.73	1.107	18.03	16.29	1.232	22.91	18.6	1.205	21.33	17.7	1.248	25.13	20.13	1.1442	38.0731	2	2	2	0	0	0	0	0	0	0	0	0	0	0	0	0	0	0	0	0	0	0	0	0	0	0	0	0	0	0	0
885	115809	1.184	80.48	67.99	1.085	17.78	16.38	1.155	18.26	15.8	1.222	21.54	17.63	1.261	22.91	18.18	1.1278	45.1404	2	2	2	0	0	0	0	0	0	0	0	0	0	0	0	0	0	0	0	0	0	0	0	0	0	0	0	0	0	0	0
886	115815	1.251	82.92	66.26	1.178	17.17	14.58	1.265	22.16	17.52	1.304	23.74	18.2	1.244	19.85	15.96	1.127	44.3522	2	2	2	0	0	0	0	0	0	0	0	0	0	0	0	0	0	0	0	0	0	0	0	0	0	0	0	0	0	0	0
887	115816	0.866	56.6	65.34	0.848	12.17	14.35	0.845	12.89	15.25	0.875	14.56	16.64	0.889	16.98	19.1	1.1304	46.9666	2	2	2	0	0	0	0	0	0	0	0	0	0	0	0	0	0	0	0	0	0	0	0	0	0	0	0	0	0	0	0
888	115843	0.893	12.6	14.12	0.893	12.6	14.12	1.101	17.15	15.57	1.184	18.23	15.4	1.139	18.04	15.83	1.1371	48.2847	2	2	2	0	0	0	0	0	0	0	0	0	0	0	0	0	0	0	0	0	0	0	0	0	0	0	0	0	0	0	0
889	115846	0.98	49.69	50.68	0.98	11.78	12.02	0.972	11.95	12.29	0.98	12.92	13.18	0.989	13.04	13.19	1.1345	46.6926	2	2	2	0	0	0	0	0	0	0	0	0	0	0	0	0	0	0	0	0	0	0	0	0	0	0	0	0	0	0	0
890	115850	0.924	45.53	49.26	0.875	9.57	10.94	1.015	12.34	12.15	0.975	11.57	11.87	0.843	12.05	14.3	1.1332	43.5639	2	2	2	0	0	0	0	0	0	0	0	0	0	0	0	0	0	0	0	0	0	0	0	0	0	0	0	0	0	0	0
891	115864	1.044	76.87	73.64	1.002	16.91	16.88	1.053	19.54	18.55	1.072	20.7	19.31	1.044	19.73	18.9	1.1363	44.9749	2	2	2	0	0	0	0	0	0	0	0	0	0	0	0	0	0	0	0	0	0	0	0	0	0	0	0	0	0	0	0
892	115868	0.766	54.74	71.48	0.643	10.82	16.82	0.729	12.12	16.63	0.824	14.95	18.14	0.847	16.85	19.89	1.1487	39.4881	2	2	2	0	0	0	0	0	0	0	0	0	0	0	0	0	0	0	0	0	0	0	0	0	0	0	0	0	0	0	0
893	115874	1.011	51.55	51	0.916	10.84	11.83	0.975	12.04	12.36	1.088	13.49	12.4	1.053	15.18	14.42	1.1351	44.603	2	2	2	0	0	0	0	0	0	0	0	0	0	0	0	0	0	0	0	0	0	0	0	0	0	0	0	0	0	0	0
894	115875	1.009	46.01	45.58	0.991	13.39	13.52	1.019	10.81	10.6	1.031	10.06	9.76	1.004	11.75	11.7	1.1207	44.1124	2	2	2	0	0	0	0	0	0	0	0	0	0	0	0	0	0	0	0	0	0	0	0	0	0	0	0	0	0	0	0
895	115882	0.834	43.39	52.01	0.766	8.67	11.32	0.856	10.18	11.89	0.82	11.52	14.06	0.882	13.01	14.75	1.1335	46.9797	2	2	2	0	0	0	0	0	0	0	0	0	0	0	0	0	0	0	0	0	0	0	0	0	0	0	0	0	0	0	0
896	115884	1.02	65.24	63.98	0.943	14	14.85	1.004	15.66	15.59	1.079	17.76	16.46	1.044	17.82	17.08	1.1491	44.1389	2	2	2	0	0	0	0	0	0	0	0	0	0	0	0	0	0	0	0	0	0	0	0	0	0	0	0	0	0	0	0
897	115888	0.859	43.42	50.55	0.836	10.25	12.26	0.854	10.62	12.43	0.885	11.5	12.98	0.858	11.05	12.88	1.1433	41.7007	2	2	2	0	0	0	0	0	0	0	0	0	0	0	0	0	0	0	0	0	0	0	0	0	0	0	0	0	0	0	0
898	115895	1.272	84.6	66.53	1.211	19.57	16.15	1.238	20.38	16.47	1.276	21.32	16.71	1.357	23.34	17.2	1.1273	46.7904	2	2	2	0	0	0	0	0	0	0	0	0	0	0	0	0	0	0	0	0	0	0	0	0	0	0	0	0	0	0	0
899	115898	1.026	68.49	66.77	0.955	13.97	14.64	1.047	17.58	16.79	1.006	17.12	17.01	1.082	19.83	18.33	1.1274	42.6578	2	2	2	0	0	0	0	0	0	0	0	0	0	0	0	0	0	0	0	0	0	0	0	0	0	0	0	0	0	0	0
900	115908	1.205	77.69	64.49	1.109	16.36	14.76	1.233	18.08	14.66	1.233	20.03	16.24	1.233	23.22	18.83	1.1561	46.0426	2	2	2	0	0	0	0	0	0	0	0	0	0	0	0	0	0	0	0	0	0	0	0	0	0	0	0	0	0	0	0
901	115909	1.15	63.25	55.01	1.067	11.86	11.12	1.167	16.1	13.79	1.153	16.71	14.5	1.191	18.57	15.59	1.1308	40.5221	2	2	2	0	0	0	0	0	0	0	0	0	0	0	0	0	0	0	0	0	0	0	0	0	0	0	0	0	0	0	0
902	115955	1.155	61.2	52.97	1.152	13.31	11.56	1.124	14.56	12.95	1.198	17.81	14.86	1.142	15.53	13.6	1.1465	37.4327	2	2	2	0	0	0	0	0	0	0	0	0	0	0	0	0	0	0	0	0	0	0	0	0	0	0	0	0	0	0	0
903	115961	1.055	76.71	72.73	0.924	13.64	14.76	1.01	17.76	17.59	1.082	21.75	20.1	1.161	23.56	20.28	1.1382	41.3954	2	2	2	0	0	0	0	0	0	0	0	0	0	0	0	0	0	0	0	0	0	0	0	0	0	0	0	0	0	0	0
904	115968	0.899	56.98	63.37	0.801	11.55	14.42	0.871	13.69	15.72	0.945	14.5	15.35	0.965	17.24	17.87	1.141	47.1054	2	1	2	0	1	0	0	0	0	0	0	0	0	0	0	73	2	1	0	0	0	0	0	0	0	0	0	0	0	0	0
905	115969	1.133	58.8	51.89	1.079	13.31	12.34	1.082	13.24	12.23	1.241	16.18	13.04	1.125	16.06	14.28	1.1478	39.589	2	2	2	0	0	0	0	0	0	0	0	0	0	0	0	0	0	0	0	0	0	0	0	0	0	0	0	0	0	0	0
906	115983	1.088	65.05	59.79	1.084	16	14.76	1.149	16.4	14.27	1.106	16.31	14.74	1.02	16.34	16.02	1.135	45.9523	2	2	1	0	0	1	0	0	0	0	0	0	0	0	0	0	0	0	0	0	0	0	0	0	0	0	0	0	0	0	0
907	115988	1.153	65.89	57.13	1.121	14.45	12.89	1.167	15.01	12.86	1.202	17.55	14.6	1.126	18.87	16.76	1.1385	46.2178	2	2	2	0	0	0	0	0	0	0	0	0	0	0	0	0	0	0	0	0	0	0	0	0	0	0	0	0	0	0	0
908	115989	0.84	55.53	66.13	0.84	12.38	14.75	0.847	13.4	15.82	0.863	13.98	16.19	0.814	15.77	19.37	1.1492	42.6735	2	2	2	0	0	0	0	0	0	0	0	0	0	0	0	0	0	0	0	0	0	0	0	0	0	0	0	0	0	0	0
909	115993	0.969	66.51	68.63	0.974	14.33	14.72	0.965	16.1	16.69	0.942	16.8	17.83	0.994	19.28	19.39	1.1303	43.0818	2	2	2	0	0	0	0	0	0	0	0	0	0	0	0	0	0	0	0	0	0	0	0	0	0	0	0	0	0	0	0
910	115996	1.248	67.21	53.84	1.239	13.45	10.86	1.184	15.29	12.92	1.261	18.71	14.84	1.297	19.76	15.23	1.1199	39.9028	2	2	2	0	0	0	0	0	0	0	0	0	0	0	0	0	0	0	0	0	0	0	0	0	0	0	0	0	0	0	0
911	116012	0.778	39.93	51.33	0.686	7.35	10.71	0.786	9.87	12.56	0.788	10.75	13.64	0.829	11.97	14.44	1.1538	45.5805	2	2	2	0	0	0	0	0	0	0	0	0	0	0	0	0	0	0	0	0	0	0	0	0	0	0	0	0	0	0	0
912	116018	1.182	81.77	69.16	1.127	17.48	15.51	1.19	21.37	17.96	1.215	19.8	16.29	1.191	23.12	19.4	1.1457	41.0648	2	2	2	0	0	0	0	0	0	0	0	0	0	0	0	0	0	0	0	0	0	0	0	0	0	0	0	0	0	0	0
913	116030	1.64	139.95	85.32	1.53	28.38	18.56	1.616	33.39	20.66	1.706	39.98	23.43	1.686	38.2	22.67	1.1389	43.0459	2	2	2	0	0	0	0	0	0	0	0	0	0	0	0	0	0	0	0	0	0	0	0	0	0	0	0	0	0	0	0
914	116057	1.151	78.42	68.14	1.073	17.37	16.2	1.147	18.04	15.72	1.194	21.81	18.27	1.181	21.2	17.96	1.1315	43.4582	2	2	2	0	0	0	0	0	0	0	0	0	0	0	0	0	0	0	0	0	0	0	0	0	0	0	0	0	0	0	0
915	116061	1.202	73.69	61.29	1.069	15.01	14.03	1.177	19.67	16.71	1.245	20.13	16.17	1.314	18.88	14.37	1.1414	45.4342	2	2	2	0	0	0	0	0	0	0	0	0	0	0	0	0	0	0	0	0	0	0	0	0	0	0	0	0	0	0	0
916	116066	1.268	95.26	75.16	1.243	22.57	18.16	1.2	22.44	18.7	1.272	23.13	18.19	1.349	27.12	20.11	1.124	43.9393	2	2	2	0	0	0	0	0	0	0	0	0	0	0	0	0	0	0	0	0	0	0	0	0	0	0	0	0	0	0	0
917	116070	1.057	64.18	60.74	0.978	13.64	13.95	1.036	15.64	15.09	1.113	17.35	15.59	1.09	17.56	16.11	1.1263	43.9735	2	2	2	0	0	0	0	0	0	0	0	0	0	0	0	0	0	0	0	0	0	0	0	0	0	0	0	0	0	0	0
918	116073	1.318	74.15	56.26	1.267	16.74	13.21	1.376	17.53	12.74	1.299	19.03	14.65	1.331	20.85	15.66	1.1313	40.3655	2	2	2	0	0	0	0	0	0	0	0	0	0	0	0	0	0	0	0	0	0	0	0	0	0	0	0	0	0	0	0
919	116077	1.002	65.46	65.35	0.97	14.73	15.18	1.059	16.47	15.55	1.007	17.94	17.82	0.972	16.32	16.8	1.1439	40.2443	2	2	2	0	0	0	0	0	0	0	0	0	0	0	0	0	0	0	0	0	0	0	0	0	0	0	0	0	0	0	0
920	116084	1.016	72.11	70.95	0.978	14.99	15.32	1.031	18.35	17.79	1.026	17.4	16.97	1.024	21.37	20.87	1.1487	42.5761	2	2	2	0	0	0	0	0	0	0	0	0	0	0	0	0	0	0	0	0	0	0	0	0	0	0	0	0	0	0	0
921	116104	0.968	68.73	71.03	0.885	14.44	16.31	0.931	15.67	16.83	1.026	19.25	18.76	1.012	19.37	19.14	1.1458	43.095	2	2	2	0	0	0	0	0	0	0	0	0	0	0	0	0	0	0	0	0	0	0	0	0	0	0	0	0	0	0	0
922	116109	1.307	76.43	58.46	1.313	17.14	13.06	1.267	16.65	13.14	1.314	20.4	15.52	1.328	22.24	16.74	1.1437	36.6928	2	2	2	0	0	0	0	0	0	0	0	0	0	0	0	0	0	0	0	0	0	0	0	0	0	0	0	0	0	0	0
923	116112	0.923	46.63	50.54	0.831	9.04	10.88	0.934	10.78	11.55	0.96	11.97	12.47	0.949	14.84	15.65	1.1281	43.2914	2	2	2	0	0	0	0	0	0	0	0	0	0	0	0	0	0	0	0	0	0	0	0	0	0	0	0	0	0	0	0
924	116118	0.811	44.67	55.09	0.809	8.61	10.65	0.787	10.1	12.84	0.77	12.01	15.59	0.872	13.96	16.01	1.1359	46.6718	2	2	1	0	0	1	0	0	0	0	0	0	0	0	0	0	0	0	0	0	0	0	0	0	0	0	0	0	0	0	0
925	116120	0.754	38.59	51.17	0.706	7.86	11.12	0.73	8.29	11.37	0.748	10.55	14.11	0.816	11.9	14.57	1.1327	47.6075	2	2	2	0	0	0	0	0	0	0	0	0	0	0	0	0	0	0	0	0	0	0	0	0	0	0	0	0	0	0	0
926	116125	1.004	75.62	75.35	1.011	17.84	17.65	1.017	18.01	17.7	1.01	18.55	18.36	0.981	21.22	21.64	1.1314	47.0768	2	2	2	0	0	0	0	0	0	0	0	0	0	0	0	0	0	0	0	0	0	0	0	0	0	0	0	0	0	0	0
927	116135	1.059	69.96	66.08	1	15.86	15.86	1.054	16.89	16.02	1.056	16.57	15.69	1.115	20.63	18.51	1.1312	43.1495	2	2	2	0	0	0	0	0	0	0	0	0	0	0	0	0	0	0	0	0	0	0	0	0	0	0	0	0	0	0	0
928	116138	0.857	37.2	43.4	0.771	7.27	9.43	0.824	8.38	10.17	0.899	9.61	10.7	0.911	11.93	13.1	1.1555	44.847	2	2	2	0	0	0	0	0	0	0	0	0	0	0	0	0	0	0	0	0	0	0	0	0	0	0	0	0	0	0	0
929	116144	1.358	91.95	67.71	1.326	19.99	15.08	1.348	21.56	15.99	1.418	25.38	17.9	1.336	25.02	18.73	1.1476	38.2921	2	2	2	0	0	0	0	0	0	0	0	0	0	0	0	0	0	0	0	0	0	0	0	0	0	0	0	0	0	0	0
930	116153	0.598	16.23	27.13	0.6	7.5	12.5	0.662	9.49	14.33	0.597	8.73	14.63	0.798	11.71	14.68	1.1305	48.319	2	2	2	0	0	0	0	0	0	0	0	0	0	0	0	0	0	0	0	0	0	0	0	0	0	0	0	0	0	0	0
931	116157	1.004	55.96	55.76	0.998	12.12	12.14	1.027	12.91	12.57	0.989	14.4	14.55	1.002	16.53	16.5	1.1334	46.2204	2	2	2	0	0	0	0	0	0	0	0	0	0	0	0	0	0	0	0	0	0	0	0	0	0	0	0	0	0	0	0
932	116167	0.915	49.51	54.14	0.813	10.13	12.47	0.886	11.5	12.98	0.985	15.46	15.7	0.956	12.41	12.98	1.1314	48.4177	2	2	2	0	0	0	0	0	0	0	0	0	0	0	0	0	0	0	0	0	0	0	0	0	0	0	0	0	0	0	0
933	116174	0.955	42.2	44.16	0.869	8.49	9.77	0.924	10.63	11.5	1.022	11.3	11.06	0.995	11.79	11.84	1.1259	47.8109	2	2	2	0	0	0	0	0	0	0	0	0	0	0	0	0	0	0	0	0	0	0	0	0	0	0	0	0	0	0	0
934	116200	1.136	73.61	64.79	1.087	16.41	15.1	1.138	17.8	15.64	1.165	20.17	17.32	1.149	19.23	16.73	1.1386	45.8312	2	2	2	0	0	0	0	0	0	0	0	0	0	0	0	0	0	0	0	0	0	0	0	0	0	0	0	0	0	0	0
935	116203	1.16	76.96	66.36	1.085	13.22	12.19	1.203	17.35	14.42	1.198	17.21	14.36	1.15	29.19	25.38	1.123	42.3554	2	2	2	0	0	0	0	0	0	0	0	0	0	0	0	0	0	0	0	0	0	0	0	0	0	0	0	0	0	0	0
936	116206	1.12	75.07	67.01	1.114	16.15	14.5	1.115	17.44	15.64	1.128	19.73	17.5	1.122	21.74	19.37	1.1293	44.2368	2	2	2	0	0	0	0	0	0	0	0	0	0	0	0	0	0	0	0	0	0	0	0	0	0	0	0	0	0	0	0
937	116210	1.133	64.67	57.06	1.066	12.43	11.65	1.17	17.17	14.67	1.184	17.97	15.17	1.099	17.12	15.57	1.1372	41.9796	2	2	2	0	0	0	0	0	0	0	0	0	0	0	0	0	0	0	0	0	0	0	0	0	0	0	0	0	0	0	0
938	116213	1.474	56.58	38.38	1.684	27.14	16.11	1.545	21.18	13.71	1.439	27.21	18.91	1.509	29.37	19.47	1.1589	40.1851	2	2	2	0	0	0	0	0	0	0	0	0	0	0	0	0	0	0	0	0	0	0	0	0	0	0	0	0	0	0	0
939	116216	0.838	46.54	55.57	0.827	10.83	13.09	0.879	12.39	14.1	0.845	12.42	14.71	0.797	10.9	13.68	1.1386	49.521	1	2	2	1	0	0	40	1	0	0	0	0	0	0	0	0	0	0	0	0	0	0	0	0	0	0	0	0	0	0	0
940	116232	0.858	52.06	60.71	0.794	8.27	10.41	0.867	13.89	16.03	0.872	14.49	16.62	0.873	15.41	17.65	1.1354	44.2275	2	2	2	0	0	0	0	0	0	0	0	0	0	0	0	0	0	0	0	0	0	0	0	0	0	0	0	0	0	0	0
941	116243	0.946	52.9	55.91	0.925	13.1	14.16	0.964	12.65	13.11	0.94	14.73	15.67	0.958	12.42	12.96	1.1315	43.157	2	2	2	0	0	0	0	0	0	0	0	0	0	0	0	0	0	0	0	0	0	0	0	0	0	0	0	0	0	0	0
942	116251	0.704	34.93	49.61	0.633	7.44	11.75	0.698	8.57	12.27	0.704	8.19	11.63	0.769	10.73	13.95	1.1346	49.383	2	2	2	0	0	0	0	0	0	0	0	0	0	0	0	0	0	0	0	0	0	0	0	0	0	0	0	0	0	0	0
943	116254	0.822	47.02	57.17	0.762	10.3	13.51	0.806	11.08	13.75	0.834	11.88	14.23	0.878	13.77	15.68	1.1306	46.6679	2	2	2	0	0	0	0	0	0	0	0	0	0	0	0	0	0	0	0	0	0	0	0	0	0	0	0	0	0	0	0
944	116265	0.96	64.32	67.02	0.922	13.97	15.16	1.005	16.64	16.56	0.981	16.33	16.65	0.933	17.39	18.64	1.1393	42.3004	2	2	2	0	0	0	0	0	0	0	0	0	0	0	0	0	0	0	0	0	0	0	0	0	0	0	0	0	0	0	0
945	116268	0.996	47.6	47.77	0.995	10.51	10.57	0.963	10.97	11.39	0.988	11.69	11.83	1.031	14.43	13.99	1.1254	41.5671	2	2	2	0	0	0	0	0	0	0	0	0	0	0	0	0	0	0	0	0	0	0	0	0	0	0	0	0	0	0	0
946	116270	1.004	69.87	69.59	0.944	14.83	15.72	0.993	17.07	17.2	1.019	17.33	17	1.049	20.65	19.68	1.1463	39.231	2	2	2	0	0	0	0	0	0	0	0	0	0	0	0	0	0	0	0	0	0	0	0	0	0	0	0	0	0	0	0
947	116271	0.898	52.82	58.8	0.924	12.4	13.43	0.873	11.73	13.44	0.891	13.6	15.26	0.905	15.09	16.67	1.1477	42.6273	2	2	2	0	0	0	0	0	0	0	0	0	0	0	0	0	0	0	0	0	0	0	0	0	0	0	0	0	0	0	0
948	116280	0.994	57.44	57.8	0.877	10.83	12.35	1.015	13.95	13.75	1.055	15.82	15	1.008	16.83	16.7	1.1556	41.0132	2	2	2	0	0	0	0	0	0	0	0	0	0	0	0	0	0	0	0	0	0	0	0	0	0	0	0	0	0	0	0
949	116283	1.2	75.47	62.89	1.144	17.37	15.18	1.168	17.08	14.63	1.262	19.58	15.52	1.221	21.45	17.56	1.1319	45.0942	2	2	2	0	0	0	0	0	0	0	0	0	0	0	0	0	0	0	0	0	0	0	0	0	0	0	0	0	0	0	0
950	116292	1.167	73.61	63.09	1.111	15.16	13.65	1.148	16.97	14.79	1.238	20.16	16.28	1.16	21.31	18.37	1.1352	45.6928	2	2	2	0	0	0	0	0	0	0	0	0	0	0	0	0	0	0	0	0	0	0	0	0	0	0	0	0	0	0	0
951	116295	0.968	58.12	60.04	0.886	10.95	12.36	0.944	14.09	14.94	1.017	16.1	15.83	1.004	16.98	16.91	1.1442	49.7282	2	2	2	0	0	0	0	0	0	0	0	0	0	0	0	0	0	0	0	0	0	0	0	0	0	0	0	0	0	0	0
952	116299	0.773	37.2	48.15	0.734	7.63	10.4	0.762	9.03	11.85	0.81	10.03	12.4	0.777	10.5	13.51	1.1418	46.7397	2	2	2	0	0	0	0	0	0	0	0	0	0	0	0	0	0	0	0	0	0	0	0	0	0	0	0	0	0	0	0
953	116303	0.694	33.57	48.37	0.669	7.64	11.42	0.653	6.94	10.62	0.705	8.83	12.52	0.736	10.16	13.8	1.1269	45.7712	2	2	2	0	0	0	0	0	0	0	0	0	0	0	0	0	0	0	0	0	0	0	0	0	0	0	0	0	0	0	0
954	116325	1.069	63.48	59.38	1.097	15.08	13.75	1.027	13.3	12.95	1.124	17.1	15.21	1.031	18.01	17.47	1.1308	39.004	2	2	2	0	0	0	0	0	0	0	0	0	0	0	0	0	0	0	0	0	0	0	0	0	0	0	0	0	0	0	0
955	116327	0.976	59.79	61.23	0.961	13.15	13.68	0.976	13.69	14.03	1.019	16.43	16.12	0.95	16.52	17.4	1.1281	45.6214	2	2	2	0	0	0	0	0	0	0	0	0	0	0	0	0	0	0	0	0	0	0	0	0	0	0	0	0	0	0	0
956	116335	1.124	72.49	64.47	1.107	17.41	15.72	1.153	17.6	15.26	1.167	19.37	16.6	1.072	18.11	16.89	1.1349	43.1223	2	2	2	0	0	0	0	0	0	0	0	0	0	0	0	0	0	0	0	0	0	0	0	0	0	0	0	0	0	0	0
957	116339	1.16	84.69	73.03	1.103	18.59	16.85	1.15	19.55	17	1.156	21.21	18.34	1.216	25.34	20.84	1.1371	39.8648	2	2	2	0	0	0	0	0	0	0	0	0	0	0	0	0	0	0	0	0	0	0	0	0	0	0	0	0	0	0	0
958	116341	1.133	57.27	50.54	1.006	10.85	10.79	1.138	14.42	12.67	1.165	13.43	11.53	1.194	18.56	15.55	1.1377	48.5345	2	2	2	0	0	0	0	0	0	0	0	0	0	0	0	0	0	0	0	0	0	0	0	0	0	0	0	0	0	0	0
959	116345	0.973	52.58	54.05	0.91	10.62	11.67	0.926	11.43	12.34	1.012	14.56	14.39	1.02	15.97	15.65	1.1416	36.9622	2	2	2	0	0	0	0	0	0	0	0	0	0	0	0	0	0	0	0	0	0	0	0	0	0	0	0	0	0	0	0
960	116346	1.061	78.3	73.81	1.026	16.7	16.28	0.998	18.64	18.68	1.116	19.09	17.11	1.098	23.87	21.75	1.1265	41.7522	2	2	1	0	0	1	0	0	0	0	0	0	0	0	0	0	0	0	0	0	0	0	0	0	0	0	0	0	0	0	0
961	116347	1.476	114.66	77.69	1.369	21.81	15.93	1.452	28.9	19.91	1.515	29.81	19.68	1.54	34.14	22.17	1.1447	36.4453	2	2	2	0	0	0	0	0	0	0	0	0	0	0	0	0	0	0	0	0	0	0	0	0	0	0	0	0	0	0	0
962	116351	0.865	23.51	27.2	0.827	10.45	12.64	0.966	11.74	12.16	0.897	13.06	14.55	0.992	11.26	11.35	1.1389	45.6189	2	1	2	0	1	0	0	0	0	0	0	0	0	0	0	34	1	0	0	0	0	0	0	0	0	0	0	0	0	0	0
963	116354	1.113	63.06	56.67	1.049	12.56	11.97	1.135	14.64	12.89	1.109	15.45	13.94	1.142	20.41	17.86	1.1256	41.8421	2	2	2	0	0	0	0	0	0	0	0	0	0	0	0	0	0	0	0	0	0	0	0	0	0	0	0	0	0	0	0
964	116357	0.911	55.65	61.1	0.901	11.29	12.52	0.943	13.82	14.66	0.902	12.87	14.26	0.899	17.67	19.65	1.1556	43.836	2	2	2	0	0	0	0	0	0	0	0	0	0	0	0	0	0	0	0	0	0	0	0	0	0	0	0	0	0	0	0
965	116374	0.988	64.29	65.07	0.944	14.19	15.04	0.954	15.54	16.3	1.032	17.35	16.81	1.017	17.21	16.91	1.135	46.9934	2	2	2	0	0	0	0	0	0	0	0	0	0	0	0	0	0	0	0	0	0	0	0	0	0	0	0	0	0	0	0
966	116375	1.173	90.22	76.88	1.104	20.12	18.22	1.207	21.79	18.06	1.21	23.97	19.81	1.17	24.34	20.8	1.1361	41.1921	2	2	2	0	0	0	0	0	0	0	0	0	0	0	0	0	0	0	0	0	0	0	0	0	0	0	0	0	0	0	0
967	116384	0.827	41.34	49.99	0.862	10.24	11.88	0.811	10.01	12.35	0.812	10.63	13.08	0.826	10.46	12.68	1.153	43.4505	2	2	2	0	0	0	0	0	0	0	0	0	0	0	0	0	0	0	0	0	0	0	0	0	0	0	0	0	0	0	0
968	116385	1.44	71.22	49.46	1.377	15.45	11.22	1.458	17.66	12.11	1.482	18.77	12.66	1.436	19.34	13.47	1.1383	39.9868	2	2	1	0	0	1	0	0	0	0	0	0	0	0	0	0	0	0	0	0	0	0	0	0	0	0	0	0	0	0	0
969	116387	1.189	71.39	60.04	1.117	14.03	12.56	1.166	17.67	15.16	1.22	18.2	14.93	1.235	21.48	17.39	1.1257	42.06	2	2	2	0	0	0	0	0	0	0	0	0	0	0	0	0	0	0	0	0	0	0	0	0	0	0	0	0	0	0	0
970	116404	0.843	44.84	53.19	0.773	9.82	12.7	0.741	9.63	13	0.906	12.27	13.54	0.941	13.13	13.96	1.1366	51.3046	2	2	2	0	0	0	0	0	0	0	0	0	0	0	0	0	0	0	0	0	0	0	0	0	0	0	0	0	0	0	0
971	116421	1.198	81.81	68.28	1.129	19.17	16.98	1.139	17.22	15.12	1.224	20.99	17.15	1.284	24.43	19.02	1.1488	38.7797	2	2	2	0	0	0	0	0	0	0	0	0	0	0	0	0	0	0	0	0	0	0	0	0	0	0	0	0	0	0	0
972	116430	1.07	76.47	71.49	0.957	15.93	16.65	1.074	17.68	16.46	1.12	20.72	18.49	1.114	22.14	19.89	1.1339	44.5146	2	2	2	0	0	0	0	0	0	0	0	0	0	0	0	0	0	0	0	0	0	0	0	0	0	0	0	0	0	0	0
973	116435	0.8	35.09	43.85	0.804	7.71	9.59	0.761	7.99	10.5	0.812	9.25	11.39	0.82	10.15	12.37	1.1472	42.0997	2	2	2	0	0	0	0	0	0	0	0	0	0	0	0	0	0	0	0	0	0	0	0	0	0	0	0	0	0	0	0
974	116437	1.081	64.41	59.58	1.107	14.07	12.72	1.063	14.35	13.5	1.06	17.18	16.21	1.097	18.81	17.15	1.1444	35.6491	2	2	2	0	0	0	0	0	0	0	0	0	0	0	0	0	0	0	0	0	0	0	0	0	0	0	0	0	0	0	0
975	116447	1.25	96.77	77.42	1.214	19.85	16.36	1.275	23.49	18.43	1.288	24.57	19.07	1.225	28.86	23.56	1.1308	44.6565	2	1	2	0	1	0	0	0	0	0	0	0	0	0	0	13	1	0	0	0	0	0	0	0	0	0	0	0	0	0	0
976	116455	0.971	52.7	54.26	0.846	9.93	11.74	0.907	11.59	12.77	1.04	13.96	13.42	1.056	17.22	16.31	1.1392	50.824	2	2	2	0	0	0	0	0	0	0	0	0	0	0	0	0	0	0	0	0	0	0	0	0	0	0	0	0	0	0	0
977	116461	1.001	78.46	78.37	0.909	15.4	16.95	1.011	19.53	19.32	1.039	20.09	19.34	1.03	23.44	22.75	1.1305	45.1746	2	1	2	0	1	0	0	0	0	0	0	0	0	0	0	75	2	3	0	0	0	0	0	0	0	0	0	0	0	0	0
978	116467	0.996	71.11	71.37	1.008	14.85	14.73	1.052	17.74	16.86	0.983	18.87	19.2	0.955	19.65	20.57	1.1387	44.3477	2	2	2	0	0	0	0	0	0	0	0	0	0	0	0	0	0	0	0	0	0	0	0	0	0	0	0	0	0	0	0
979	116472	1.041	61.8	59.34	0.977	12.48	12.78	1.012	14.82	14.65	1.071	16.69	15.59	1.091	17.8	16.33	1.1324	43.2421	2	1	2	0	1	0	0	0	0	0	0	0	0	0	0	53	2	1	0	0	0	0	0	0	0	0	0	0	0	0	0
980	116483	0.77	38.29	49.73	0.679	7.45	10.98	0.767	9.39	12.23	0.812	9.98	12.3	0.807	11.47	14.22	1.153	44.4724	2	1	2	0	1	0	0	0	0	0	0	0	0	0	0	63	2	1	0	0	0	0	0	0	0	0	0	0	0	0	0
981	116484	0.918	66.02	71.92	0.819	12.54	15.31	0.864	15.08	17.45	0.935	18.2	19.46	1.025	20.2	19.7	1.1329	44.5185	2	2	2	0	0	0	0	0	0	0	0	0	0	0	0	0	0	0	0	0	0	0	0	0	0	0	0	0	0	0	0
982	116485	0.961	59	61.39	0.975	13.04	13.37	0.983	14.11	14.35	0.925	14.62	15.8	0.965	17.23	17.86	1.1336	46.732	2	2	2	0	0	0	0	0	0	0	0	0	0	0	0	0	0	0	0	0	0	0	0	0	0	0	0	0	0	0	0
983	116486	0.978	54.36	55.6	0.953	14.17	14.88	0.937	14.65	15.64	1.006	14.8	14.71	1.035	10.74	10.37	1.1334	46.4667	2	2	2	0	0	0	0	0	0	0	0	0	0	0	0	0	0	0	0	0	0	0	0	0	0	0	0	0	0	0	0
984	116493	1.054	65.7	62.32	0.981	13.2	13.45	1.029	15.79	15.35	1.097	18.15	16.55	1.094	18.57	16.97	1.1396	40.5691	2	2	2	0	0	0	0	0	0	0	0	0	0	0	0	0	0	0	0	0	0	0	0	0	0	0	0	0	0	0	0
985	116500	0.906	55.5	61.25	0.815	10.95	13.45	0.927	14.4	15.54	0.966	14.92	15.44	0.905	15.22	16.82	1.1256	44.1974	2	1	2	0	1	0	0	0	0	0	0	0	0	0	0	20	1	0	0	0	0	0	0	0	0	0	0	0	0	0	0
986	116503	0.777	53.65	69.02	0.754	11.4	15.11	0.761	13.13	17.26	0.768	13.57	17.66	0.819	15.55	18.99	1.1553	42.8643	2	2	2	0	0	0	0	0	0	0	0	0	0	0	0	0	0	0	0	0	0	0	0	0	0	0	0	0	0	0	0
987	116504	0.888	48.38	54.47	0.706	8.48	12.02	0.873	11.45	13.11	0.927	12.42	13.39	1.005	16.03	15.95	1.1476	41.419	2	2	2	0	0	0	0	0	0	0	0	0	0	0	0	0	0	0	0	0	0	0	0	0	0	0	0	0	0	0	0
988	116510	1.065	57.42	53.9	1.021	11.6	11.36	1.075	12.14	11.29	1.141	15.98	14.01	1.026	17.71	17.25	1.1397	45.177	2	2	2	0	0	0	0	0	0	0	0	0	0	0	0	0	0	0	0	0	0	0	0	0	0	0	0	0	0	0	0
989	116522	1.305	90.33	69.22	1.274	19.51	15.32	1.343	21.95	16.34	1.258	23.54	18.71	1.344	25.32	18.84	1.1316	44.2427	2	2	2	0	0	0	0	0	0	0	0	0	0	0	0	0	0	0	0	0	0	0	0	0	0	0	0	0	0	0	0
990	116531	1.018	75.41	74.08	0.949	15.67	16.5	1.007	17.77	17.64	1.097	21.48	19.58	1.007	20.49	20.35	1.13	42.3349	2	1	2	0	1	0	0	0	0	0	0	0	0	0	0	50	2	2	0	0	0	0	0	0	0	0	0	0	0	0	0
991	116533	0.791	41.43	52.36	0.76	9.16	12.06	0.822	9.72	11.82	0.823	11.03	13.41	0.764	11.52	15.07	1.141	47.2603	2	2	2	0	0	0	0	0	0	0	0	0	0	0	0	0	0	0	0	0	0	0	0	0	0	0	0	0	0	0	0
992	116547	1.01	55.12	54.57	0.921	11.27	12.24	1.043	13.16	12.61	1.101	15.74	14.3	0.97	14.94	15.41	1.1498	42.0174	2	2	2	0	0	0	0	0	0	0	0	0	0	0	0	0	0	0	0	0	0	0	0	0	0	0	0	0	0	0	0
993	116556	0.899	52.36	58.27	0.906	12.29	13.56	0.898	11.78	13.12	0.929	14	15.06	0.865	14.3	16.53	1.1505	42.61	2	2	2	0	0	0	0	0	0	0	0	0	0	0	0	0	0	0	0	0	0	0	0	0	0	0	0	0	0	0	0
994	116569	0.904	33.1	36.61	1.064	15.21	14.3	1.077	17.53	16.28	0.91	15.4	16.92	0.899	17.7	19.69	1.1235	43.8019	2	1	2	0	1	0	0	0	0	0	0	0	0	0	0	6	1	0	0	0	0	0	0	0	0	0	0	0	0	0	0
995	116572	0.724	47.13	65.13	0.755	11.3	14.97	0.774	12.16	15.71	0.727	12.64	17.38	0.647	11.04	17.07	1.1327	47.1149	2	2	2	0	0	0	0	0	0	0	0	0	0	0	0	0	0	0	0	0	0	0	0	0	0	0	0	0	0	0	0
996	116580	1.091	60.44	55.4	1.019	12.19	11.96	1.01	13.39	13.26	1.145	17.15	14.98	1.165	17.71	15.19	1.1559	46.4782	2	2	2	0	0	0	0	0	0	0	0	0	0	0	0	0	0	0	0	0	0	0	0	0	0	0	0	0	0	0	0
997	116582	0.882	44.49	50.45	0.834	9.92	11.9	0.91	10.56	11.61	0.909	12.37	13.61	0.873	11.63	13.33	1.1381	45.7286	2	2	2	0	0	0	0	0	0	0	0	0	0	0	0	0	0	0	0	0	0	0	0	0	0	0	0	0	0	0	0
998	116587	1.039	64.15	61.73	1.083	16.57	15.3	1.008	14.88	14.76	1.091	16.59	15.21	0.979	16.11	16.46	1.1315	38.3348	2	2	2	0	0	0	0	0	0	0	0	0	0	0	0	0	0	0	0	0	0	0	0	0	0	0	0	0	0	0	0
999	116588	1.117	80.66	72.19	1.109	16.26	14.66	1.058	17.06	16.12	1.07	20.2	18.89	1.205	27.14	22.53	1.144	39.4944	2	2	2	0	0	0	0	0	0	0	0	0	0	0	0	0	0	0	0	0	0	0	0	0	0	0	0	0	0	0	0
1000	116596	0.89	68.65	77.12	0.877	14.97	17.08	0.93	18.17	19.54	0.858	18.96	22.11	0.9	16.55	18.39	1.1284	42.2018	2	2	2	0	0	0	0	0	0	0	0	0	0	0	0	0	0	0	0	0	0	0	0	0	0	0	0	0	0	0	0
1001	116600	0.882	53.56	60.75	0.816	11.71	14.34	0.846	12.6	14.89	0.92	15.63	16.98	0.937	13.62	14.53	1.1293	42.9445	2	2	2	0	0	0	0	0	0	0	0	0	0	0	0	0	0	0	0	0	0	0	0	0	0	0	0	0	0	0	0
1002	116605	0.934	41.38	44.29	0.946	10.06	10.63	0.891	8.53	9.57	0.92	10.52	11.43	0.971	12.28	12.65	1.1506	37.3479	2	2	2	0	0	0	0	0	0	0	0	0	0	0	0	0	0	0	0	0	0	0	0	0	0	0	0	0	0	0	0
1003	116607	1.102	69.34	62.95	0.973	13.18	13.54	1.109	16.73	15.08	1.122	17.67	15.75	1.171	21.76	18.58	1.1504	40.8014	2	2	2	0	0	0	0	0	0	0	0	0	0	0	0	0	0	0	0	0	0	0	0	0	0	0	0	0	0	0	0
1004	116608	1.117	61.39	54.98	1.043	12.89	12.36	1.063	13.57	12.76	1.185	16.19	13.66	1.157	18.74	16.19	1.1285	44.7244	2	1	2	0	2	0	0	0	0	0	0	0	0	0	0	7	1	0	70	2	1	0	0	0	0	0	0	0	0	0	0
1005	116610	0.806	45.77	56.76	0.798	11.14	13.97	0.805	10.8	13.42	0.853	12.57	14.73	0.769	11.26	14.64	1.1515	44.3049	2	2	2	0	0	0	0	0	0	0	0	0	0	0	0	0	0	0	0	0	0	0	0	0	0	0	0	0	0	0	0
1006	116616	1.082	68.53	63.35	0.974	13.5	13.86	1.049	15.61	14.88	1.13	19	16.81	1.148	20.43	17.8	1.1471	39.6109	2	2	2	0	0	0	0	0	0	0	0	0	0	0	0	0	0	0	0	0	0	0	0	0	0	0	0	0	0	0	0
1007	116622	0.936	68.27	72.95	0.925	16.06	17.37	0.955	16.32	17.09	0.982	18.58	18.92	0.884	17.31	19.57	1.135	46.79	2	2	2	0	0	0	0	0	0	0	0	0	0	0	0	0	0	0	0	0	0	0	0	0	0	0	0	0	0	0	0
1008	116623	0.943	45.98	48.76	0.873	9.69	11.1	0.956	11.42	11.95	1	12.42	12.42	0.936	12.45	13.29	1.1304	44.0972	2	2	2	0	0	0	0	0	0	0	0	0	0	0	0	0	0	0	0	0	0	0	0	0	0	0	0	0	0	0	0
1009	116625	1.026	59.13	57.65	0.938	13.44	14.33	0.927	11.37	12.26	1.076	15.25	14.17	1.13	19.08	16.89	1.1371	47.2085	2	1	2	0	1	0	0	0	0	0	0	0	0	0	0	79	2	1	0	0	0	0	0	0	0	0	0	0	0	0	0
1010	116628	0.906	51.18	56.49	0.854	11.86	13.89	0.842	10.2	12.12	0.909	13.75	15.13	1.001	15.36	15.35	1.1507	41.3148	2	1	2	0	1	0	0	0	0	0	0	0	0	0	0	18	1	0	0	0	0	0	0	0	0	0	0	0	0	0	0
1011	116632	1.175	86.29	73.41	1.179	17.88	15.17	1.172	20.7	17.66	1.225	24.98	20.4	1.126	22.72	20.18	1.1262	41.6281	2	2	2	0	0	0	0	0	0	0	0	0	0	0	0	0	0	0	0	0	0	0	0	0	0	0	0	0	0	0	0
1012	116650	1.102	66.73	60.58	1.068	14.14	13.23	1.089	16.34	15	1.094	15.56	14.22	1.142	20.7	18.12	1.1365	48.2552	2	2	2	0	0	0	0	0	0	0	0	0	0	0	0	0	0	0	0	0	0	0	0	0	0	0	0	0	0	0	0
1013	116654	1.059	69.24	65.39	1.045	15.11	14.46	1.037	16.14	15.57	1.089	19.33	17.75	1.059	18.66	17.62	1.1304	44.9085	2	2	2	0	0	0	0	0	0	0	0	0	0	0	0	0	0	0	0	0	0	0	0	0	0	0	0	0	0	0	0
1014	116662	1.069	63.22	59.14	0.919	13.36	14.53	1.07	14.33	13.39	1.189	17.49	14.71	1.093	18.05	16.51	1.1305	43.2401	2	2	2	0	0	0	0	0	0	0	0	0	0	0	0	0	0	0	0	0	0	0	0	0	0	0	0	0	0	0	0
1015	116667	0.956	52.03	54.4	0.853	10.44	12.24	0.953	12.66	13.28	1.019	14.07	13.8	0.986	14.86	15.07	1.1304	47.2262	2	2	2	0	0	0	0	0	0	0	0	0	0	0	0	0	0	0	0	0	0	0	0	0	0	0	0	0	0	0	0
1016	116691	0.879	45.19	51.41	0.808	9.65	11.95	0.91	11.91	13.1	0.854	11.28	13.2	0.938	12.35	13.17	1.1516	41.5989	2	2	2	0	0	0	0	0	0	0	0	0	0	0	0	0	0	0	0	0	0	0	0	0	0	0	0	0	0	0	0
1017	116694	1.067	62.88	58.94	1.009	12.78	12.66	1.127	16.89	14.98	1.111	16.38	14.75	1.018	16.84	16.54	1.1347	46.8315	2	1	2	0	1	0	0	0	0	0	0	0	0	0	0	12	1	0	0	0	0	0	0	0	0	0	0	0	0	0	0
1018	116710	1.125	77.05	68.47	1.184	16.82	14.21	1.11	19.86	17.89	1.083	19.37	17.88	1.136	21	18.48	1.1292	40.4433	2	2	2	0	0	0	0	0	0	0	0	0	0	0	0	0	0	0	0	0	0	0	0	0	0	0	0	0	0	0	0
1019	116728	0.968	54.12	55.88	0.928	11.71	12.62	1.012	13.68	13.53	0.991	14.33	14.46	0.942	14.39	15.28	1.1568	43.7343	2	2	2	0	0	0	0	0	0	0	0	0	0	0	0	0	0	0	0	0	0	0	0	0	0	0	0	0	0	0	0
1020	116734	0.956	51.94	54.35	0.845	9.85	11.66	0.947	12.12	12.8	0.993	14.7	14.81	1.013	15.27	15.08	1.1443	39.5991	2	2	2	0	0	0	0	0	0	0	0	0	0	0	0	0	0	0	0	0	0	0	0	0	0	0	0	0	0	0	0
1021	116739	0.761	43.92	57.71	0.705	9.02	12.8	0.753	10.49	13.94	0.769	11.8	15.34	0.807	12.61	15.64	1.1453	50.8272	2	2	2	0	0	0	0	0	0	0	0	0	0	0	0	0	0	0	0	0	0	0	0	0	0	0	0	0	0	0	0
1022	116747	0.881	51.96	59	0.858	10.99	12.8	0.931	12.77	13.72	0.901	13.42	14.9	0.841	14.78	17.58	1.1362	48.4486	2	2	2	0	0	0	0	0	0	0	0	0	0	0	0	0	0	0	0	0	0	0	0	0	0	0	0	0	0	0	0
1023	116757	0.963	54.34	56.4	0.975	12.51	12.83	0.919	12.66	13.77	1.003	14.35	14.32	0.957	14.82	15.49	1.1245	39.7429	2	2	2	0	0	0	0	0	0	0	0	0	0	0	0	0	0	0	0	0	0	0	0	0	0	0	0	0	0	0	0
1024	116762	1.147	65.68	57.25	1.106	13.82	12.5	1.122	13.83	12.33	1.175	18.94	16.12	1.172	19.09	16.3	1.1369	37.8248	2	2	2	0	0	0	0	0	0	0	0	0	0	0	0	0	0	0	0	0	0	0	0	0	0	0	0	0	0	0	0
1025	116776	1.135	89.67	79	1.134	19.6	17.29	1.101	19.17	17.42	1.181	22.91	19.4	1.125	27.99	24.89	1.1294	41.4821	2	2	2	0	0	0	0	0	0	0	0	0	0	0	0	0	0	0	0	0	0	0	0	0	0	0	0	0	0	0	0
1026	116780	1.028	64.4	62.66	0.956	13.57	14.19	0.988	14.39	14.56	1.035	16.94	16.37	1.112	19.51	17.54	1.1316	43.1588	2	2	2	0	0	0	0	0	0	0	0	0	0	0	0	0	0	0	0	0	0	0	0	0	0	0	0	0	0	0	0
1027	116783	1.031	70.04	67.91	0.961	14.84	15.45	1.035	17.08	16.51	1.072	18.42	17.19	1.049	19.69	18.76	1.1296	44.0187	2	2	2	0	0	0	0	0	0	0	0	0	0	0	0	0	0	0	0	0	0	0	0	0	0	0	0	0	0	0	0
1028	116784	0.954	61.47	64.41	0.918	13.28	14.46	0.93	14.76	15.87	0.989	16.43	16.61	0.973	16.99	17.46	1.1424	40.3823	2	2	2	0	0	0	0	0	0	0	0	0	0	0	0	0	0	0	0	0	0	0	0	0	0	0	0	0	0	0	0
1029	116786	0.896	56.11	62.65	0.801	11.16	13.94	0.891	14.01	15.73	0.896	14.36	16.03	0.978	16.58	16.95	1.1434	40.4074	2	2	2	0	0	0	0	0	0	0	0	0	0	0	0	0	0	0	0	0	0	0	0	0	0	0	0	0	0	0	0
1030	116799	0.959	47.2	49.23	0.858	8.45	9.86	0.985	11.39	11.56	1.007	13.43	13.34	0.963	13.93	14.47	1.1333	40.1315	2	2	2	0	0	0	0	0	0	0	0	0	0	0	0	0	0	0	0	0	0	0	0	0	0	0	0	0	0	0	0
1031	116802	0.854	49.29	57.74	0.733	10.02	13.66	0.73	9.69	13.27	0.826	12.04	14.58	1.08	17.53	16.23	1.1288	45.8214	2	2	2	0	0	0	0	0	0	0	0	0	0	0	0	0	0	0	0	0	0	0	0	0	0	0	0	0	0	0	0
1032	116816	0.935	61.09	65.32	0.899	12.99	14.45	0.929	13.56	14.59	0.999	17.68	17.7	0.907	16.87	18.59	1.1479	42.7662	2	1	2	0	1	0	0	0	0	0	0	0	0	0	0	75	2	1	0	0	0	0	0	0	0	0	0	0	0	0	0
1033	116819	1.078	76.53	71.01	1.032	18.22	17.65	1.033	17.07	16.52	1.082	20.02	18.51	1.157	21.22	18.33	1.1357	44.4657	2	1	2	0	2	0	0	0	0	0	0	0	0	0	0	13	1	0	22	1	0	0	0	0	0	0	0	0	0	0	0
1034	116846	1.112	79.17	71.17	1.084	15.8	14.57	1.085	17.82	16.42	1.063	20.27	19.07	1.198	25.28	21.11	1.1362	43.8045	2	2	2	0	0	0	0	0	0	0	0	0	0	0	0	0	0	0	0	0	0	0	0	0	0	0	0	0	0	0	0
1035	116855	0.824	30.52	37.02	0.766	8.41	10.98	0.828	10.07	12.17	0.868	12.03	13.87	0.97	14.24	14.68	1.154	41.6562	2	2	2	0	0	0	0	0	0	0	0	0	0	0	0	0	0	0	0	0	0	0	0	0	0	0	0	0	0	0	0
1036	116858	1.21	79.67	65.83	1.08	16.05	14.86	1.191	18.7	15.7	1.229	21.44	17.45	1.317	23.48	17.82	1.1363	46.2446	2	2	2	0	0	0	0	0	0	0	0	0	0	0	0	0	0	0	0	0	0	0	0	0	0	0	0	0	0	0	0
1037	116864	1.142	65.41	57.28	1.113	15.53	13.95	1.178	15.8	13.42	1.16	16.25	14	1.121	17.83	15.91	1.126	40.0798	2	2	2	0	0	0	0	0	0	0	0	0	0	0	0	0	0	0	0	0	0	0	0	0	0	0	0	0	0	0	0
1038	116866	0.587	27.66	47.09	0.594	7.06	11.89	0.596	7.04	11.81	0.59	7.75	13.13	0.567	5.81	10.26	1.1357	47.2856	2	1	2	0	2	0	0	0	0	0	0	0	0	0	0	40	1	0	43	1	0	0	0	0	0	0	0	0	0	0	0
1039	116867	1.246	71.06	57.03	1.155	15.34	13.28	1.233	17.02	13.81	1.265	19.29	15.26	1.321	19.4	14.69	1.1352	45.5602	2	2	2	0	0	0	0	0	0	0	0	0	0	0	0	0	0	0	0	0	0	0	0	0	0	0	0	0	0	0	0
1040	116871	0.998	55.38	55.48	0.827	8.97	10.85	0.932	12.28	13.17	1.074	16.47	15.33	1.095	17.66	16.14	1.1355	44.8398	2	2	2	0	0	0	0	0	0	0	0	0	0	0	0	0	0	0	0	0	0	0	0	0	0	0	0	0	0	0	0
1041	116881	1.01	61.82	61.18	0.946	12.91	13.65	1.03	14.78	14.35	0.998	15.96	15.99	1.057	18.16	17.19	1.1493	43.4159	2	2	2	0	0	0	0	0	0	0	0	0	0	0	0	0	0	0	0	0	0	0	0	0	0	0	0	0	0	0	0
1042	116884	0.911	60.45	66.33	0.794	12.25	15.43	0.884	13.49	15.26	0.964	16.64	17.26	0.983	18.07	18.39	1.1267	46.5579	2	2	2	0	0	0	0	0	0	0	0	0	0	0	0	0	0	0	0	0	0	0	0	0	0	0	0	0	0	0	0
1043	116888	0.684	34.17	49.96	0.715	7.62	10.65	0.678	7.69	11.34	0.66	9.34	14.15	0.69	9.53	13.81	1.1598	45.5898	2	2	2	0	0	0	0	0	0	0	0	0	0	0	0	0	0	0	0	0	0	0	0	0	0	0	0	0	0	0	0
1044	116896	1.014	55.16	54.4	0.958	11.9	12.42	1.017	13.15	12.94	1.037	15.53	14.97	1.036	14.58	14.08	1.1408	50.9675	2	2	2	0	0	0	0	0	0	0	0	0	0	0	0	0	0	0	0	0	0	0	0	0	0	0	0	0	0	0	0
1045	116898	1.193	66.07	55.4	1.135	12.72	11.21	1.196	17.85	14.93	1.208	18.47	15.29	1.218	17.03	13.98	1.1484	38.4205	2	2	2	0	0	0	0	0	0	0	0	0	0	0	0	0	0	0	0	0	0	0	0	0	0	0	0	0	0	0	0
1046	116900	1.071	78.48	73.26	1.084	16.91	15.6	1.069	17.96	16.8	1.109	21.49	19.37	1.03	22.12	21.48	1.1158	44.5665	2	2	2	0	0	0	0	0	0	0	0	0	0	0	0	0	0	0	0	0	0	0	0	0	0	0	0	0	0	0	0
1047	116906	1.165	69.1	59.33	1.086	14.58	13.43	1.208	15.86	13.13	1.16	17.28	14.89	1.196	21.38	17.88	1.1432	40.5407	2	2	2	0	0	0	0	0	0	0	0	0	0	0	0	0	0	0	0	0	0	0	0	0	0	0	0	0	0	0	0
1048	116911	1.07	78.62	73.49	1.022	16.61	16.26	1.057	18.76	17.75	1.075	20.95	19.49	1.115	22.3	20	1.1417	37.5439	2	2	2	0	0	0	0	0	0	0	0	0	0	0	0	0	0	0	0	0	0	0	0	0	0	0	0	0	0	0	0
1049	116915	1.196	67.85	56.73	1.116	14.09	12.62	1.171	16.57	14.16	1.274	18.94	14.87	1.21	18.25	15.08	1.1309	46.6916	2	2	2	0	0	0	0	0	0	0	0	0	0	0	0	0	0	0	0	0	0	0	0	0	0	0	0	0	0	0	0
1050	116920	0.903	44.27	49.02	0.914	10.79	11.81	0.895	11.19	12.51	0.958	9.43	9.85	0.865	12.85	14.86	1.1285	44.3125	2	1	2	0	1	0	0	0	0	0	0	0	0	0	0	30	1	0	0	0	0	0	0	0	0	0	0	0	0	0	0
1051	116956	1.113	59.51	53.46	1.004	12.46	12.41	1.153	14.84	12.87	1.096	14.62	13.34	1.186	17.59	14.84	1.132	45.906	2	2	2	0	0	0	0	0	0	0	0	0	0	0	0	0	0	0	0	0	0	0	0	0	0	0	0	0	0	0	0
1052	116961	1.185	79.02	66.67	0.994	12.46	12.54	1.12	18.87	16.85	1.226	21.39	17.45	1.326	26.29	19.82	1.1366	43.036	2	2	2	0	0	0	0	0	0	0	0	0	0	0	0	0	0	0	0	0	0	0	0	0	0	0	0	0	0	0	0
1053	116966	0.934	49.26	52.72	0.926	11.31	12.21	0.985	12.36	12.55	0.919	12.37	13.46	0.911	13.22	14.51	1.1302	41.8144	2	2	2	0	0	0	0	0	0	0	0	0	0	0	0	0	0	0	0	0	0	0	0	0	0	0	0	0	0	0	0
1054	116980	0.885	48.21	54.46	0.776	9.44	12.16	0.9	11.8	13.11	0.956	13.24	13.85	0.895	13.73	15.34	1.1381	46.8674	2	2	2	0	0	0	0	0	0	0	0	0	0	0	0	0	0	0	0	0	0	0	0	0	0	0	0	0	0	0	0
1055	116984	1.313	92.22	70.22	1.25	17.96	14.37	1.368	21.71	15.87	1.341	26.96	20.11	1.288	25.59	19.87	1.1271	42.8711	2	2	2	0	0	0	0	0	0	0	0	0	0	0	0	0	0	0	0	0	0	0	0	0	0	0	0	0	0	0	0
1056	116989	1.083	71.33	65.83	1.011	14.84	14.68	1.069	16.1	15.07	1.088	19.09	17.55	1.149	21.3	18.54	1.1429	43.3252	2	2	2	0	0	0	0	0	0	0	0	0	0	0	0	0	0	0	0	0	0	0	0	0	0	0	0	0	0	0	0
1057	116997	0.982	55.6	56.6	0.905	11.7	12.94	0.954	12.95	13.57	0.988	14.6	14.79	1.068	16.35	15.31	1.1345	45.4923	2	2	2	0	0	0	0	0	0	0	0	0	0	0	0	0	0	0	0	0	0	0	0	0	0	0	0	0	0	0	0
1058	117000	0.786	43.72	55.65	0.763	10.4	13.64	0.769	9.88	12.86	0.756	10.63	14.06	0.848	12.8	15.09	1.152	43.6688	2	2	2	0	0	0	0	0	0	0	0	0	0	0	0	0	0	0	0	0	0	0	0	0	0	0	0	0	0	0	0
1059	117006	0.922	46.83	50.79	0.823	9.04	10.98	0.904	11.15	12.33	1.033	12.91	12.5	0.917	13.73	14.98	1.1394	38.2772	2	2	2	0	0	0	0	0	0	0	0	0	0	0	0	0	0	0	0	0	0	0	0	0	0	0	0	0	0	0	0
1060	117009	1.304	69.72	53.47	1.249	12.99	10.4	1.269	15.78	12.44	1.343	19.16	14.27	1.331	21.79	16.37	1.1344	37.1695	2	2	2	0	0	0	0	0	0	0	0	0	0	0	0	0	0	0	0	0	0	0	0	0	0	0	0	0	0	0	0
1061	117010	1.052	54.38	51.68	1.021	12.44	12.18	1.044	12.92	12.38	1.092	14.26	13.06	1.049	14.75	14.06	1.1418	38.5449	2	2	2	0	0	0	0	0	0	0	0	0	0	0	0	0	0	0	0	0	0	0	0	0	0	0	0	0	0	0	0
1062	117011	0.823	39.57	48.06	0.767	8.04	10.48	0.829	9.49	11.44	0.839	9.81	11.69	0.847	12.24	14.45	1.1344	46.9146	2	2	2	0	0	0	0	0	0	0	0	0	0	0	0	0	0	0	0	0	0	0	0	0	0	0	0	0	0	0	0
1063	117020	0.981	56.5	57.59	0.952	11.3	11.87	0.993	13.31	13.41	0.994	16.29	16.38	0.979	15.6	15.93	1.1311	46.3546	2	2	2	0	0	0	0	0	0	0	0	0	0	0	0	0	0	0	0	0	0	0	0	0	0	0	0	0	0	0	0
1064	117022	0.69	33.83	49.02	0.669	7.79	11.66	0.672	7.32	10.9	0.705	10.01	14.19	0.71	8.71	12.28	1.1238	45.9521	2	1	2	0	3	0	0	0	0	0	0	0	0	0	0	8	1	0	9	1	0	10	1	0	0	0	0	0	0	0	0
1065	117037	0.918	57.77	62.96	0.833	11.9	14.27	0.932	14.81	15.88	0.937	14.58	15.56	0.956	16.48	17.25	1.1444	40.9624	2	2	2	0	0	0	0	0	0	0	0	0	0	0	0	0	0	0	0	0	0	0	0	0	0	0	0	0	0	0	0
1066	117044	0.807	48.67	60.33	0.805	10.96	13.62	0.811	11.42	14.1	0.815	13.28	16.29	0.797	13.01	16.32	1.1297	45.1714	2	1	2	0	1	0	0	0	0	0	0	0	0	0	0	70	2	2	0	0	0	0	0	0	0	0	0	0	0	0	0
1067	117045	1.14	73.98	64.91	1.157	16.74	14.46	1.139	16.69	14.66	1.113	20.48	18.4	1.155	20.08	17.39	1.1311	41.4813	2	2	2	0	0	0	0	0	0	0	0	0	0	0	0	0	0	0	0	0	0	0	0	0	0	0	0	0	0	0	0
1068	117046	1.064	64.93	61.05	1.111	13.85	12.47	1.083	15.92	14.7	1.072	17.82	16.62	1.005	17.34	17.26	1.1298	47.7574	2	2	2	0	0	0	0	0	0	0	0	0	0	0	0	0	0	0	0	0	0	0	0	0	0	0	0	0	0	0	0
1069	117058	1.084	57.22	52.8	1.048	13.32	12.71	1.11	14.12	12.72	1.09	16.39	15.04	1.086	13.39	12.33	1.1368	43.711	2	2	2	0	0	0	0	0	0	0	0	0	0	0	0	0	0	0	0	0	0	0	0	0	0	0	0	0	0	0	0
1070	117064	1.251	60.15	48.06	1.127	14.2	12.61	1.253	14.48	11.56	1.277	13.84	10.84	1.35	17.63	13.06	1.127	42.3484	2	1	2	0	1	0	0	0	0	0	0	0	0	0	0	51	2	1	0	0	0	0	0	0	0	0	0	0	0	0	0
1071	117067	1.016	54.79	53.92	1.047	12.3	11.74	0.991	11.55	11.65	1.047	13.68	13.07	0.989	17.25	17.45	1.1279	43.8658	2	2	2	0	0	0	0	0	0	0	0	0	0	0	0	0	0	0	0	0	0	0	0	0	0	0	0	0	0	0	0
1072	117076	0.888	43.35	48.82	0.855	9.04	10.58	0.962	11.62	12.08	0.935	11.14	11.92	0.81	11.54	14.25	1.1418	37.491	2	2	2	0	0	0	0	0	0	0	0	0	0	0	0	0	0	0	0	0	0	0	0	0	0	0	0	0	0	0	0
1073	117077	1.061	62.9	59.28	0.963	13.3	13.81	1.095	15.16	13.84	1.064	16.15	15.18	1.112	18.29	16.45	1.1439	41.1227	2	2	2	0	0	0	0	0	0	0	0	0	0	0	0	0	0	0	0	0	0	0	0	0	0	0	0	0	0	0	0
1074	117090	0.792	44.97	56.78	0.667	9.04	13.55	0.797	11.11	13.94	0.922	12.3	13.34	0.785	12.52	15.95	1.146	40.2637	2	2	1	0	0	1	0	0	0	0	0	0	0	0	0	0	0	0	0	0	0	0	0	0	0	0	0	0	0	0	0
1075	117091	0.873	58.49	67.01	0.871	12.82	14.71	0.861	13.57	15.77	0.882	15.73	17.84	0.876	16.37	18.69	1.133	41.9889	2	2	2	0	0	0	0	0	0	0	0	0	0	0	0	0	0	0	0	0	0	0	0	0	0	0	0	0	0	0	0
1076	117092	0.997	43.25	43.38	0.99	9.63	9.73	1.057	9.82	9.29	1.036	10.56	10.2	0.934	13.23	14.16	1.1351	43.8241	2	2	2	0	0	0	0	0	0	0	0	0	0	0	0	0	0	0	0	0	0	0	0	0	0	0	0	0	0	0	0
1077	117108	0.782	47.63	60.87	0.748	9.28	12.41	0.741	10.24	13.83	0.773	11.96	15.48	0.843	16.14	19.16	1.1363	44.833	2	1	2	0	1	0	0	0	0	0	0	0	0	0	0	23	1	0	0	0	0	0	0	0	0	0	0	0	0	0	0
1078	117117	1.019	48.03	47.14	1.019	8.8	8.63	1.078	11.76	10.91	1.049	13.23	12.61	0.95	14.25	14.99	1.1281	42.4437	2	2	2	0	0	0	0	0	0	0	0	0	0	0	0	0	0	0	0	0	0	0	0	0	0	0	0	0	0	0	0
1079	117130	0.84	40.62	48.38	0.825	9.32	11.3	0.832	9.44	11.34	0.9	11.02	12.24	0.803	10.84	13.5	1.1572	44.398	2	1	2	0	1	0	0	0	0	0	0	0	0	0	0	43	1	0	0	0	0	0	0	0	0	0	0	0	0	0	0
1080	117133	0.918	44.85	48.84	0.784	8.53	10.89	0.875	10.64	12.17	0.977	12.25	12.54	1.013	13.42	13.24	1.149	44.3145	2	2	2	0	0	0	0	0	0	0	0	0	0	0	0	0	0	0	0	0	0	0	0	0	0	0	0	0	0	0	0
1081	117136	0.91	54.12	59.5	0.905	12.01	13.26	0.843	11.57	13.72	0.942	15.39	16.33	0.937	15.16	16.18	1.1427	42.311	2	2	2	0	0	0	0	0	0	0	0	0	0	0	0	0	0	0	0	0	0	0	0	0	0	0	0	0	0	0	0
1082	117150	0.817	50.84	62.25	0.675	7.87	11.66	0.778	12.26	15.75	0.845	12.54	14.85	0.909	18.17	19.98	1.1232	44.0797	2	2	2	0	0	0	0	0	0	0	0	0	0	0	0	0	0	0	0	0	0	0	0	0	0	0	0	0	0	0	0
1083	117158	1.051	51.92	49.4	0.939	12.44	13.24	1.052	11.69	11.11	1.156	12.67	10.96	1.074	15.13	14.08	1.1495	38.7762	2	2	2	0	0	0	0	0	0	0	0	0	0	0	0	0	0	0	0	0	0	0	0	0	0	0	0	0	0	0	0
1084	117161	1.031	64.04	62.09	0.933	13.85	14.85	1.044	16.28	15.6	1.074	16.81	15.65	1.069	17.1	15.99	1.1549	45.6976	2	2	2	0	0	0	0	0	0	0	0	0	0	0	0	0	0	0	0	0	0	0	0	0	0	0	0	0	0	0	0
1085	117166	0.861	67.09	77.91	0.841	13.46	16.01	0.887	15.88	17.9	0.886	17.11	19.32	0.837	20.64	24.68	1.1504	40.8117	2	9	2	0	0	0	0	0	0	0	0	0	0	0	0	0	0	0	0	0	0	0	0	0	0	0	0	0	0	0	0
1086	117173	0.93	58.9	63.33	0.838	12.22	14.59	0.915	13.56	14.83	0.968	15.56	16.08	0.984	17.55	17.83	1.1402	42.3099	2	2	2	0	0	0	0	0	0	0	0	0	0	0	0	0	0	0	0	0	0	0	0	0	0	0	0	0	0	0	0
1087	117204	0.998	60.68	60.8	0.81	9.56	11.81	0.923	13.71	14.85	1.081	18.23	16.86	1.11	19.19	17.28	1.1393	47.9472	2	2	2	0	0	0	0	0	0	0	0	0	0	0	0	0	0	0	0	0	0	0	0	0	0	0	0	0	0	0	0
1088	117217	1.013	69.13	68.24	0.891	13.19	14.81	0.992	17.47	17.6	1.074	18.91	17.6	1.073	19.57	18.23	1.1337	44.2386	2	2	2	0	0	0	0	0	0	0	0	0	0	0	0	0	0	0	0	0	0	0	0	0	0	0	0	0	0	0	0
1089	117219	0.84	40.11	47.76	0.81	8.64	10.67	0.848	9.08	10.7	0.857	10.28	12	0.842	12.11	14.38	1.1327	45.937	2	2	2	0	0	0	0	0	0	0	0	0	0	0	0	0	0	0	0	0	0	0	0	0	0	0	0	0	0	0	0
1090	117220	0.907	52.35	57.75	0.813	10.25	12.61	0.912	12.6	13.81	0.905	13.57	14.99	0.976	15.94	16.34	1.1302	45.0658	2	2	2	0	0	0	0	0	0	0	0	0	0	0	0	0	0	0	0	0	0	0	0	0	0	0	0	0	0	0	0
1091	117221	0.907	52.62	58	0.825	9.99	12.11	0.877	12.3	14.02	0.976	14.48	14.84	0.931	15.85	17.03	1.1358	46.201	2	1	2	0	1	0	0	0	0	0	0	0	0	0	0	8	1	0	0	0	0	0	0	0	0	0	0	0	0	0	0
1092	117222	1.365	101.62	74.42	1.297	20.62	15.9	1.396	23.76	17.03	1.439	28.12	19.55	1.327	29.13	21.96	1.1391	48.1492	2	2	2	0	0	0	0	0	0	0	0	0	0	0	0	0	0	0	0	0	0	0	0	0	0	0	0	0	0	0	0
1093	117235	0.939	49.45	52.69	0.876	10.96	12.5	0.973	12.21	12.54	0.981	13.95	14.22	0.919	12.34	13.43	1.1509	42.693	2	2	2	0	0	0	0	0	0	0	0	0	0	0	0	0	0	0	0	0	0	0	0	0	0	0	0	0	0	0	0
1094	117236	0.883	64.51	73.06	0.874	14.08	16.11	0.865	14.75	17.04	0.909	17.15	18.87	0.881	18.54	21.04	1.1511	44.2342	2	2	2	0	0	0	0	0	0	0	0	0	0	0	0	0	0	0	0	0	0	0	0	0	0	0	0	0	0	0	0
1095	117238	1.131	78.32	69.25	1.044	15.32	14.67	1.156	17.67	15.29	1.119	18.82	16.82	1.18	26.51	22.46	1.1314	41.7775	2	2	2	0	0	0	0	0	0	0	0	0	0	0	0	0	0	0	0	0	0	0	0	0	0	0	0	0	0	0	0
1096	117241	1.156	82.19	71.09	1.094	18.71	17.1	1.168	18.39	15.74	1.208	21.68	17.95	1.153	23.41	20.31	1.1483	36.9476	2	2	2	0	0	0	0	0	0	0	0	0	0	0	0	0	0	0	0	0	0	0	0	0	0	0	0	0	0	0	0
1097	117243	1.029	63.59	61.78	0.933	13.02	13.95	1.057	15.25	14.44	1.101	17.29	15.7	1.019	18.03	17.69	1.1535	44.1367	2	2	2	0	0	0	0	0	0	0	0	0	0	0	0	0	0	0	0	0	0	0	0	0	0	0	0	0	0	0	0
1098	117250	0.807	44.88	55.6	0.826	9.85	11.93	0.777	10.2	13.12	0.817	12.05	14.74	0.808	12.78	15.81	1.1529	41.4342	2	2	2	0	0	0	0	0	0	0	0	0	0	0	0	0	0	0	0	0	0	0	0	0	0	0	0	0	0	0	0
1099	117263	1.013	67.64	66.74	0.955	13.94	14.6	0.942	14.87	15.79	1.056	18.36	17.39	1.079	20.46	18.96	1.1343	42.5453	2	2	2	0	0	0	0	0	0	0	0	0	0	0	0	0	0	0	0	0	0	0	0	0	0	0	0	0	0	0	0
1100	117266	0.766	42.92	56	0.71	9.61	13.54	0.768	8.96	11.67	0.742	10.05	13.54	0.829	14.3	17.25	1.1336	47.7209	1	2	2	1	0	0	65	2	1	0	0	0	0	0	0	0	0	0	0	0	0	0	0	0	0	0	0	0	0	0	0
1101	117273	0.878	52.78	60.1	0.783	10.93	13.96	0.846	11.9	14.07	0.95	13.54	14.26	0.921	16.4	17.81	1.1334	46.0885	2	2	2	0	0	0	0	0	0	0	0	0	0	0	0	0	0	0	0	0	0	0	0	0	0	0	0	0	0	0	0
1102	117275	1.032	70.33	68.17	1.096	15.98	14.58	1.034	17.41	16.84	1.02	18.41	18.05	0.991	18.53	18.7	1.1498	41.9371	2	2	2	0	0	0	0	0	0	0	0	0	0	0	0	0	0	0	0	0	0	0	0	0	0	0	0	0	0	0	0
1103	117289	0.944	51.7	54.76	0.894	10.88	12.17	0.958	12.67	13.22	0.989	13.64	13.8	0.932	14.51	15.57	1.1464	42.2486	2	2	2	0	0	0	0	0	0	0	0	0	0	0	0	0	0	0	0	0	0	0	0	0	0	0	0	0	0	0	0
1104	117294	1.022	75.25	73.6	0.899	15.72	17.48	1.019	18.11	17.78	1.105	19.16	17.35	1.06	22.25	20.99	1.146	40.2342	2	2	2	0	0	0	0	0	0	0	0	0	0	0	0	0	0	0	0	0	0	0	0	0	0	0	0	0	0	0	0
1105	117295	1.406	83.6	59.46	1.29	18.83	14.59	1.387	20.64	14.88	1.452	22.02	15.17	1.492	22.11	14.82	1.1422	37.3201	2	2	2	0	0	0	0	0	0	0	0	0	0	0	0	0	0	0	0	0	0	0	0	0	0	0	0	0	0	0	0
1106	117297	1.016	57.67	56.76	0.934	10.44	11.17	1.037	14.29	13.78	1.024	15.48	15.11	1.046	17.46	16.69	1.1431	41.4262	2	2	2	0	0	0	0	0	0	0	0	0	0	0	0	0	0	0	0	0	0	0	0	0	0	0	0	0	0	0	0
1107	117305	1.003	54.97	54.83	0.938	12.06	12.85	0.966	12.16	12.59	1.027	15.75	15.34	1.069	15.01	14.04	1.1297	46.2941	2	2	2	0	0	0	0	0	0	0	0	0	0	0	0	0	0	0	0	0	0	0	0	0	0	0	0	0	0	0	0
1108	117307	0.813	38.99	47.97	0.754	8.71	11.55	0.833	9.55	11.47	0.802	10.8	13.47	0.864	9.93	11.49	1.1353	48.928	2	2	2	0	0	0	0	0	0	0	0	0	0	0	0	0	0	0	0	0	0	0	0	0	0	0	0	0	0	0	0
1109	117312	0.913	44.56	48.8	0.908	9.47	10.43	0.949	10.49	11.06	0.92	11.45	12.45	0.885	13.15	14.86	1.1309	43.9467	2	2	2	0	0	0	0	0	0	0	0	0	0	0	0	0	0	0	0	0	0	0	0	0	0	0	0	0	0	0	0
1110	117314	1.138	73.42	64.5	1.098	15.03	13.69	1.101	16.14	14.66	1.184	19.57	16.53	1.155	22.67	19.63	1.1393	42.6703	2	2	2	0	0	0	0	0	0	0	0	0	0	0	0	0	0	0	0	0	0	0	0	0	0	0	0	0	0	0	0
1111	117315	0.888	47.58	53.55	0.797	10.25	12.87	0.859	10.9	12.68	0.916	12.23	13.35	0.97	14.21	14.65	1.1368	46.4075	2	2	2	0	0	0	0	0	0	0	0	0	0	0	0	0	0	0	0	0	0	0	0	0	0	0	0	0	0	0	0
1112	117316	1.392	90.53	65.02	1.38	19	13.77	1.397	21.15	15.14	1.45	23.83	16.44	1.35	26.55	19.66	1.1411	39.8359	2	2	2	0	0	0	0	0	0	0	0	0	0	0	0	0	0	0	0	0	0	0	0	0	0	0	0	0	0	0	0
1113	117319	0.949	33	34.75	0.864	8.9	10.3	0.992	11.46	11.55	0.98	12.64	12.9	1.089	14.37	13.19	1.1471	42.716	2	2	2	0	0	0	0	0	0	0	0	0	0	0	0	0	0	0	0	0	0	0	0	0	0	0	0	0	0	0	0
1114	117335	1.38	100.44	72.81	1.358	22.36	16.46	1.407	23.24	16.52	1.371	26.45	19.3	1.383	28.39	20.53	1.1254	42.7676	2	2	1	0	0	1	0	0	0	0	0	0	0	0	0	0	0	0	0	0	0	0	0	0	0	0	0	0	0	0	0
1115	117349	1.165	74.19	63.69	1.02	13.85	13.59	1.103	16.3	14.78	1.213	19.41	16	1.275	24.63	19.32	1.1575	44.477	2	2	2	0	0	0	0	0	0	0	0	0	0	0	0	0	0	0	0	0	0	0	0	0	0	0	0	0	0	0	0
1116	117353	1.028	70.93	69	0.942	14.49	15.39	0.991	16.11	16.26	1.087	18.85	17.35	1.074	21.48	20	1.1269	45.6714	2	2	2	0	0	0	0	0	0	0	0	0	0	0	0	0	0	0	0	0	0	0	0	0	0	0	0	0	0	0	0
1117	117354	1.033	51.15	49.51	0.987	11.2	11.34	1.018	12.46	12.24	1.083	13.98	12.91	1.039	13.52	13.01	1.1531	41.7618	2	1	1	0	1	1	0	0	0	0	0	0	0	0	0	67	2	1	0	0	0	0	0	0	0	0	0	0	0	0	0
1118	117359	1.128	77.9	69.03	1.091	17.73	16.25	1.068	17.55	16.44	1.136	19.58	17.23	1.205	23.04	19.12	1.1389	37.1416	2	2	2	0	0	0	0	0	0	0	0	0	0	0	0	0	0	0	0	0	0	0	0	0	0	0	0	0	0	0	0
1119	117363	1.333	75.04	56.29	1.293	19.27	14.9	1.33	18.62	14	1.346	16.36	12.15	1.364	20.78	15.24	1.1341	37.9003	2	2	2	0	0	0	0	0	0	0	0	0	0	0	0	0	0	0	0	0	0	0	0	0	0	0	0	0	0	0	0
1120	117365	1.458	66.88	45.87	1.346	19.37	14.39	1.495	21.67	14.49	1.51	23.54	15.59	1.508	23.97	15.89	1.1363	41.393	2	2	2	0	0	0	0	0	0	0	0	0	0	0	0	0	0	0	0	0	0	0	0	0	0	0	0	0	0	0	0
1121	117370	0.902	64.02	70.96	0.886	14.15	15.97	0.932	14.97	16.08	0.92	18.13	19.7	0.873	16.77	19.21	1.1328	44.5929	2	2	2	0	0	0	0	0	0	0	0	0	0	0	0	0	0	0	0	0	0	0	0	0	0	0	0	0	0	0	0
1122	117374	0.837	44.07	52.68	0.841	9.11	10.83	0.847	10.76	12.7	0.811	11.2	13.82	0.848	13	15.33	1.1347	46.3091	2	1	2	0	1	0	0	0	0	0	0	0	0	0	0	56	2	2	0	0	0	0	0	0	0	0	0	0	0	0	0
1123	117395	0.762	35.61	46.71	0.632	6.13	9.71	0.738	8.28	11.22	0.795	9.48	11.93	0.846	11.71	13.84	1.1391	48.3119	2	2	2	0	0	0	0	0	0	0	0	0	0	0	0	0	0	0	0	0	0	0	0	0	0	0	0	0	0	0	0
1124	117397	1.216	77.75	63.91	1.173	17.16	14.62	1.224	18.04	14.74	1.223	19.39	15.86	1.239	23.16	18.7	1.1358	46.8459	2	2	2	0	0	0	0	0	0	0	0	0	0	0	0	0	0	0	0	0	0	0	0	0	0	0	0	0	0	0	0
1125	117400	0.845	62.1	73.49	0.759	12.37	16.31	0.824	14.18	17.2	0.849	16.55	19.5	0.928	19	20.48	1.128	44.337	2	2	2	0	0	0	0	0	0	0	0	0	0	0	0	0	0	0	0	0	0	0	0	0	0	0	0	0	0	0	0
1126	117402	1.039	60.35	58.09	0.917	12.53	13.66	1.029	13.45	13.07	1.062	15.61	14.7	1.127	18.77	16.66	1.1486	41.8097	2	2	2	0	0	0	0	0	0	0	0	0	0	0	0	0	0	0	0	0	0	0	0	0	0	0	0	0	0	0	0
1127	117414	1.008	66.3	65.75	0.918	13.18	14.35	1.024	16	15.63	1.036	17.92	17.3	1.04	19.2	18.47	1.1443	39.0616	2	2	2	0	0	0	0	0	0	0	0	0	0	0	0	0	0	0	0	0	0	0	0	0	0	0	0	0	0	0	0
1128	117431	1.03	55.22	53.61	0.971	13.01	13.4	1.057	12.7	12.02	1.098	15.75	14.35	0.993	13.76	13.85	1.1349	38.1454	2	2	2	0	0	0	0	0	0	0	0	0	0	0	0	0	0	0	0	0	0	0	0	0	0	0	0	0	0	0	0
1129	117432	1.116	73.66	65.98	1.026	14.17	13.81	1.152	17.9	15.54	1.154	18.65	16.17	1.121	22.93	20.46	1.1355	48.1453	2	1	2	0	1	0	0	0	0	0	0	0	0	0	0	45	1	0	0	0	0	0	0	0	0	0	0	0	0	0	0
1130	117435	1.015	54.53	53.72	1.004	13	12.95	1.064	13.51	12.7	1.032	14.36	13.92	0.964	13.65	14.16	1.125	45.8406	2	2	2	0	0	0	0	0	0	0	0	0	0	0	0	0	0	0	0	0	0	0	0	0	0	0	0	0	0	0	0
1131	117437	1.034	58.72	56.79	0.947	13.32	14.07	1.051	14.36	13.66	1.1	16.36	14.88	1.035	14.68	14.19	1.1346	45.9549	2	2	2	0	0	0	0	0	0	0	0	0	0	0	0	0	0	0	0	0	0	0	0	0	0	0	0	0	0	0	0
1132	117440	1.255	85.09	67.78	1.141	17.48	15.32	1.231	20.83	16.93	1.308	23.11	17.66	1.324	23.67	17.87	1.1337	43.4752	2	1	2	0	1	0	0	0	0	0	0	0	0	0	0	46	1	0	0	0	0	0	0	0	0	0	0	0	0	0	0
1133	117441	1.079	73.11	67.78	0.968	14.81	15.3	1.04	16.4	15.77	1.143	19.83	17.34	1.14	22.08	19.37	1.1305	46.2103	2	2	2	0	0	0	0	0	0	0	0	0	0	0	0	0	0	0	0	0	0	0	0	0	0	0	0	0	0	0	0
1134	117450	0.918	63.41	69.09	0.861	13.73	15.95	0.862	13.99	16.22	0.963	17.16	17.81	0.97	18.53	19.11	1.1568	42.5468	2	1	2	0	4	0	0	0	0	0	0	0	0	0	0	10	1	0	11	1	0	12	1	0	16	1	0	0	0	0	0
1135	117454	1.195	85.77	71.78	1.096	17.93	16.37	1.152	20.22	17.56	1.213	23.14	19.08	1.303	24.47	18.78	1.1482	41.9009	2	2	2	0	0	0	0	0	0	0	0	0	0	0	0	0	0	0	0	0	0	0	0	0	0	0	0	0	0	0	0
1136	117458	0.914	56.82	62.2	0.828	12.37	14.93	0.895	13.56	15.15	0.947	14.61	15.44	0.977	16.29	16.68	1.1259	47.0639	2	2	2	0	0	0	0	0	0	0	0	0	0	0	0	0	0	0	0	0	0	0	0	0	0	0	0	0	0	0	0
1137	117494	0.877	47.46	54.12	0.797	9.82	12.32	0.795	10.39	13.08	0.945	13.09	13.85	0.952	14.15	14.86	1.1304	49.441	2	2	2	0	0	0	0	0	0	0	0	0	0	0	0	0	0	0	0	0	0	0	0	0	0	0	0	0	0	0	0
1138	117507	0.842	50.78	60.34	0.787	11.66	14.81	0.867	13.69	15.79	0.838	13.31	15.88	0.875	12.13	13.86	1.1413	38.5423	2	2	2	0	0	0	0	0	0	0	0	0	0	0	0	0	0	0	0	0	0	0	0	0	0	0	0	0	0	0	0
1139	117510	1.038	52.06	50.14	0.939	10.28	10.95	1.082	11.75	10.87	1.058	13.73	12.98	1.062	16.3	15.35	1.1576	44.5896	2	2	2	0	0	0	0	0	0	0	0	0	0	0	0	0	0	0	0	0	0	0	0	0	0	0	0	0	0	0	0
1140	117516	1.094	76.52	69.92	1.058	17.65	16.68	1.038	17.53	16.9	1.149	20	17.41	1.127	21.34	18.94	1.1354	43.0954	2	2	2	0	0	0	0	0	0	0	0	0	0	0	0	0	0	0	0	0	0	0	0	0	0	0	0	0	0	0	0
1141	117518	1.002	60.24	60.11	0.942	11.43	12.13	0.985	13.64	13.84	1.069	17.04	15.94	0.997	18.13	18.2	1.141	46.3362	2	2	2	0	0	0	0	0	0	0	0	0	0	0	0	0	0	0	0	0	0	0	0	0	0	0	0	0	0	0	0
1142	117540	1.196	98.7	82.53	1.106	21.01	18.99	1.154	21.67	18.78	1.233	23.74	19.25	1.266	32.29	25.51	1.1283	42.4414	2	2	2	0	0	0	0	0	0	0	0	0	0	0	0	0	0	0	0	0	0	0	0	0	0	0	0	0	0	0	0
1143	117542	1.133	75.26	66.44	1.152	18.51	16.06	1.152	18.4	15.97	1.134	18.85	16.62	1.097	19.5	17.78	1.1304	41.2561	2	1	2	0	1	0	0	0	0	0	0	0	0	0	0	16	1	0	0	0	0	0	0	0	0	0	0	0	0	0	0
1144	117546	1.181	73.88	62.56	1.073	15.06	14.03	1.183	20.02	16.92	1.219	19.64	16.12	1.237	19.16	15.49	1.1334	42.9129	2	2	2	0	0	0	0	0	0	0	0	0	0	0	0	0	0	0	0	0	0	0	0	0	0	0	0	0	0	0	0
1145	117551	0.832	50.26	60.41	0.803	10.56	13.16	0.833	11.57	13.89	0.801	13.05	16.29	0.883	15.08	17.08	1.1279	43.9818	2	2	2	0	0	0	0	0	0	0	0	0	0	0	0	0	0	0	0	0	0	0	0	0	0	0	0	0	0	0	0
1146	117558	1.082	57.18	52.87	0.977	8.69	8.89	1.02	13.75	13.48	1.15	15.85	13.78	1.13	18.88	16.71	1.1284	46.9156	2	2	2	0	0	0	0	0	0	0	0	0	0	0	0	0	0	0	0	0	0	0	0	0	0	0	0	0	0	0	0
1147	117589	0.746	42.01	56.33	0.69	8.44	12.24	0.732	9.84	13.44	0.793	11.59	14.62	0.757	12.14	16.03	1.1302	46.0005	2	2	2	0	0	0	0	0	0	0	0	0	0	0	0	0	0	0	0	0	0	0	0	0	0	0	0	0	0	0	0
1148	117598	1.063	67.39	63.37	0.936	10.14	10.84	1.021	14.33	14.03	1.064	18.33	17.23	1.156	24.58	21.27	1.1392	41.6802	2	2	2	0	0	0	0	0	0	0	0	0	0	0	0	0	0	0	0	0	0	0	0	0	0	0	0	0	0	0	0
1149	117616	0.672	34.75	51.7	0.656	8.03	12.25	0.693	9.39	13.55	0.672	9.36	13.94	0.666	7.97	11.96	1.1313	44.3361	2	2	2	0	0	0	0	0	0	0	0	0	0	0	0	0	0	0	0	0	0	0	0	0	0	0	0	0	0	0	0
1150	117622	0.82	44.26	54	0.768	9.59	12.5	0.832	10.3	12.39	0.849	11.54	13.6	0.827	12.82	15.51	1.1362	48.3802	2	2	2	0	0	0	0	0	0	0	0	0	0	0	0	0	0	0	0	0	0	0	0	0	0	0	0	0	0	0	0
1151	117635	0.761	45.37	59.6	0.669	8.87	13.26	0.761	10.78	14.16	0.796	12.86	16.16	0.803	12.86	16.01	1.1379	47.6061	2	2	2	0	0	0	0	0	0	0	0	0	0	0	0	0	0	0	0	0	0	0	0	0	0	0	0	0	0	0	0
1152	117643	1.189	78.1	65.69	1.16	17.53	15.11	1.145	17.66	15.42	1.28	20.38	15.92	1.172	22.54	19.24	1.1514	43.3542	2	2	2	0	0	0	0	0	0	0	0	0	0	0	0	0	0	0	0	0	0	0	0	0	0	0	0	0	0	0	0
1153	117652	0.996	70.81	71.07	0.884	14.06	15.9	1.022	17.34	16.97	1.046	18.91	18.07	1.019	20.5	20.13	1.136	47.7096	2	2	2	0	0	0	0	0	0	0	0	0	0	0	0	0	0	0	0	0	0	0	0	0	0	0	0	0	0	0	0
1154	117657	0.854	47.1	55.13	0.817	9.51	11.63	0.832	10.35	12.44	0.866	12.14	14.01	0.886	15.11	17.05	1.1399	44.5869	2	2	2	0	0	0	0	0	0	0	0	0	0	0	0	0	0	0	0	0	0	0	0	0	0	0	0	0	0	0	0
1155	117665	0.746	39.16	52.51	0.674	7.87	11.68	0.783	10.49	13.41	0.736	9.16	12.45	0.777	11.64	14.98	1.1495	41.6045	2	1	2	0	2	0	0	0	0	0	0	0	0	0	0	53	2	1	57	2	2	0	0	0	0	0	0	0	0	0	0
1156	117666	1.113	59.23	53.23	1.029	14.06	13.67	1.082	13.62	12.59	1.178	16.35	13.88	1.161	15.2	13.09	1.126	41.5973	2	1	2	0	1	0	0	0	0	0	0	0	0	0	0	62	2	1	0	0	0	0	0	0	0	0	0	0	0	0	0
1157	117672	0.949	45.5	47.97	0.966	10.5	10.87	0.893	9.69	10.85	0.977	11.66	11.94	0.954	13.65	14.32	1.1298	41.1188	2	2	2	0	0	0	0	0	0	0	0	0	0	0	0	0	0	0	0	0	0	0	0	0	0	0	0	0	0	0	0
1158	117678	1.081	73.68	68.14	1.024	15.11	14.76	1.071	17.73	16.56	1.078	18.56	17.23	1.137	22.28	19.6	1.1575	41.9487	2	2	2	0	0	0	0	0	0	0	0	0	0	0	0	0	0	0	0	0	0	0	0	0	0	0	0	0	0	0	0
1159	117682	0.913	47.85	52.38	0.774	8.96	11.58	0.864	11.01	12.74	0.99	14.68	14.83	0.997	13.2	13.23	1.1319	46.9668	2	1	2	0	1	0	0	0	0	0	0	0	0	0	0	58	2	3	0	0	0	0	0	0	0	0	0	0	0	0	0
1160	117695	1.357	85.21	62.78	1.308	18.14	13.87	1.303	18.49	14.19	1.351	21.49	15.9	1.44	27.1	18.81	1.1531	41.1168	2	2	2	0	0	0	0	0	0	0	0	0	0	0	0	0	0	0	0	0	0	0	0	0	0	0	0	0	0	0	0
1161	117704	1.082	69.58	64.28	1.132	15.75	13.91	1.064	16.97	15.94	1.005	17.41	17.33	1.138	19.46	17.1	1.1228	41.9619	2	2	2	0	0	0	0	0	0	0	0	0	0	0	0	0	0	0	0	0	0	0	0	0	0	0	0	0	0	0	0
1162	117711	0.751	38.16	50.81	0.689	7.23	10.49	0.699	8.51	12.17	0.832	11.67	14.02	0.762	10.75	14.12	1.1525	42.4567	2	2	2	0	0	0	0	0	0	0	0	0	0	0	0	0	0	0	0	0	0	0	0	0	0	0	0	0	0	0	0
1163	117714	1.018	63.32	62.18	0.925	12.29	13.29	1.025	14.58	14.22	1.03	16.6	16.12	1.07	19.85	18.55	1.1411	48.4572	2	2	2	0	0	0	0	0	0	0	0	0	0	0	0	0	0	0	0	0	0	0	0	0	0	0	0	0	0	0	0
1164	117727	0.995	45.14	45.35	0.812	8.34	10.27	0.954	11.4	11.95	1.122	13.92	12.41	1.071	11.48	10.73	1.1398	48.7827	2	2	2	0	0	0	0	0	0	0	0	0	0	0	0	0	0	0	0	0	0	0	0	0	0	0	0	0	0	0	0
1165	117734	1.148	81.95	71.4	1.073	16.57	15.44	1.191	20.48	17.2	1.125	20.66	18.37	1.188	24.24	20.4	1.1482	40.2103	2	2	2	0	0	0	0	0	0	0	0	0	0	0	0	0	0	0	0	0	0	0	0	0	0	0	0	0	0	0	0
1166	117753	0.819	45.93	56.07	0.773	10.01	12.94	0.819	11.06	13.5	0.888	13.71	15.44	0.786	11.15	14.19	1.1493	44.5988	1	1	2	1	1	0	48	1	0	0	0	0	0	0	0	48	1	0	0	0	0	0	0	0	0	0	0	0	0	0	0
1167	117780	1.148	82.67	71.98	1.12	18.84	16.82	1.137	20.19	17.75	1.15	21.19	18.43	1.184	22.46	18.98	1.1361	44.9168	2	2	2	0	0	0	0	0	0	0	0	0	0	0	0	0	0	0	0	0	0	0	0	0	0	0	0	0	0	0	0
1168	117784	1.188	83.21	70.05	1.138	18.62	16.37	1.217	19.64	16.13	1.163	21.9	18.82	1.231	23.05	18.73	1.1518	42.5923	2	2	2	0	0	0	0	0	0	0	0	0	0	0	0	0	0	0	0	0	0	0	0	0	0	0	0	0	0	0	0
1169	117792	0.884	49.11	55.53	0.913	12.26	13.44	0.9	11.13	12.36	0.916	13.87	15.14	0.812	11.85	14.6	1.1465	42.3864	2	2	2	0	0	0	0	0	0	0	0	0	0	0	0	0	0	0	0	0	0	0	0	0	0	0	0	0	0	0	0
1170	117793	0.782	37.57	48.04	0.657	6.75	10.28	0.762	8.46	11.1	0.862	11.49	13.32	0.816	10.87	13.33	1.1539	43.6663	2	2	2	0	0	0	0	0	0	0	0	0	0	0	0	0	0	0	0	0	0	0	0	0	0	0	0	0	0	0	0
1171	117806	1.259	93.12	73.99	1.201	18.82	15.67	1.204	20.71	17.21	1.256	22.27	17.74	1.34	31.32	23.37	1.1421	41.5862	2	2	2	0	0	0	0	0	0	0	0	0	0	0	0	0	0	0	0	0	0	0	0	0	0	0	0	0	0	0	0
1172	117807	0.873	40.4	46.28	0.761	8.21	10.78	0.875	9.71	11.1	0.904	11.52	12.75	0.941	10.96	11.65	1.1265	45.5703	2	2	2	0	0	0	0	0	0	0	0	0	0	0	0	0	0	0	0	0	0	0	0	0	0	0	0	0	0	0	0
1173	117816	0.916	64.52	70.44	0.84	15.23	18.13	0.938	15.46	16.49	0.93	16.51	17.76	0.959	17.33	18.06	1.1372	39.5976	2	1	2	0	1	0	0	0	0	0	0	0	0	0	0	64	2	3	0	0	0	0	0	0	0	0	0	0	0	0	0
1174	117817	1.093	63.23	57.84	1.112	15.29	13.75	1.097	15.47	14.1	1.103	16.19	14.68	1.063	16.28	15.32	1.1328	45.3281	2	2	2	0	0	0	0	0	0	0	0	0	0	0	0	0	0	0	0	0	0	0	0	0	0	0	0	0	0	0	0
1175	117826	1.038	53.1	51.17	0.975	10.81	11.09	1.061	12.11	11.41	1.076	14.69	13.66	1.032	15.48	15	1.1327	43.9779	2	2	2	0	0	0	0	0	0	0	0	0	0	0	0	0	0	0	0	0	0	0	0	0	0	0	0	0	0	0	0
1176	117827	0.777	38.58	49.68	0.72	8.46	11.76	0.742	8.33	11.23	0.801	10.43	13.03	0.832	11.36	13.66	1.1477	44.0464	2	2	2	0	0	0	0	0	0	0	0	0	0	0	0	0	0	0	0	0	0	0	0	0	0	0	0	0	0	0	0
1177	117829	0.939	58.23	61.99	0.853	12.27	14.39	0.931	13.9	14.92	1.01	16.16	16.01	0.954	15.9	16.67	1.1368	42.0868	2	2	2	0	0	0	0	0	0	0	0	0	0	0	0	0	0	0	0	0	0	0	0	0	0	0	0	0	0	0	0
1178	117856	0.794	39.96	50.32	0.77	9.14	11.86	0.822	9.4	11.44	0.832	10.16	12.22	0.761	11.26	14.8	1.1405	50.8025	2	2	2	0	0	0	0	0	0	0	0	0	0	0	0	0	0	0	0	0	0	0	0	0	0	0	0	0	0	0	0
1179	117858	1.263	77.61	61.45	1.207	17.29	14.33	1.313	19.35	14.75	1.288	21.17	16.44	1.242	19.8	15.94	1.1362	42.4785	2	2	2	0	0	0	0	0	0	0	0	0	0	0	0	0	0	0	0	0	0	0	0	0	0	0	0	0	0	0	0
1180	117866	0.894	59.68	66.76	0.834	11.83	14.18	0.942	14.24	15.12	0.9	16.34	18.15	0.895	17.27	19.31	1.1485	39.6742	2	2	2	0	0	0	0	0	0	0	0	0	0	0	0	0	0	0	0	0	0	0	0	0	0	0	0	0	0	0	0
1181	117879	1.098	78.24	71.24	1.046	17.6	16.82	1.112	18.51	16.65	1.12	19.53	17.43	1.111	22.59	20.33	1.1305	43.6632	2	2	2	0	0	0	0	0	0	0	0	0	0	0	0	0	0	0	0	0	0	0	0	0	0	0	0	0	0	0	0
1182	117882	1.254	85.57	68.24	1.153	17.96	15.57	1.25	19.59	15.68	1.305	21.9	16.78	1.292	26.11	20.21	1.1508	39.683	2	2	2	0	0	0	0	0	0	0	0	0	0	0	0	0	0	0	0	0	0	0	0	0	0	0	0	0	0	0	0
1183	117884	0.841	19.28	22.91	0.944	11.24	11.9	0.813	7	8.61	0.859	12.28	14.3	1.177	15.84	13.46	1.1365	50.525	2	2	2	0	0	0	0	0	0	0	0	0	0	0	0	0	0	0	0	0	0	0	0	0	0	0	0	0	0	0	0
1184	117893	1.055	55.54	52.62	1.022	12.6	12.33	1.055	12.77	12.1	1.143	15.34	13.43	1.004	14.83	14.76	1.1306	43.7988	2	2	2	0	0	0	0	0	0	0	0	0	0	0	0	0	0	0	0	0	0	0	0	0	0	0	0	0	0	0	0
1185	117900	1.221	84.28	69.03	1.078	16.6	15.41	1.182	18.78	15.89	1.255	23.4	18.64	1.335	25.49	19.1	1.1542	41.4884	2	2	2	0	0	0	0	0	0	0	0	0	0	0	0	0	0	0	0	0	0	0	0	0	0	0	0	0	0	0	0
1186	117912	0.85	46.16	54.28	0.785	9.25	11.78	0.827	11.19	13.54	0.907	12.58	13.87	0.87	13.13	15.09	1.1465	39.4638	2	2	2	0	0	0	0	0	0	0	0	0	0	0	0	0	0	0	0	0	0	0	0	0	0	0	0	0	0	0	0
1187	117913	1.082	64.72	59.8	1.081	12.96	11.99	1.114	15.2	13.64	1.087	16.66	15.32	1.056	19.91	18.85	1.1341	42.5924	2	2	2	0	0	0	0	0	0	0	0	0	0	0	0	0	0	0	0	0	0	0	0	0	0	0	0	0	0	0	0
1188	117917	1.003	51.47	51.3	0.872	9.32	10.69	1.005	11.98	11.92	1.037	13.29	12.82	1.063	16.88	15.88	1.1518	40.5968	2	1	2	0	1	0	0	0	0	0	0	0	0	0	0	61	2	1	0	0	0	0	0	0	0	0	0	0	0	0	0
1189	117950	0.766	39.1	51.07	0.738	8.64	11.7	0.734	8.61	11.72	0.791	10.32	13.06	0.791	11.54	14.6	1.1518	45.0878	2	2	2	0	0	0	0	0	0	0	0	0	0	0	0	0	0	0	0	0	0	0	0	0	0	0	0	0	0	0	0
1190	117957	1.093	53.52	48.96	1.022	9.61	9.4	1.089	12.02	11.04	1.1	14.7	13.36	1.136	17.21	15.15	1.1454	39.27	2	2	2	0	0	0	0	0	0	0	0	0	0	0	0	0	0	0	0	0	0	0	0	0	0	0	0	0	0	0	0
1191	117994	0.911	46.04	50.53	0.858	9.36	10.91	0.882	11.17	12.66	0.97	14.12	14.56	0.919	11.39	12.4	1.1291	45.0864	2	2	2	0	0	0	0	0	0	0	0	0	0	0	0	0	0	0	0	0	0	0	0	0	0	0	0	0	0	0	0
1192	117999	1.002	57.62	57.53	0.899	10.76	11.96	0.999	15.1	15.11	1.022	15.51	15.18	1.064	16.25	15.27	1.1516	42.7376	2	2	2	0	0	0	0	0	0	0	0	0	0	0	0	0	0	0	0	0	0	0	0	0	0	0	0	0	0	0	0
1193	118001	0.803	51.47	64.1	0.684	10.41	15.21	0.764	11.78	15.43	0.865	14.39	16.63	0.885	14.89	16.82	1.1345	46.4237	2	2	2	0	0	0	0	0	0	0	0	0	0	0	0	0	0	0	0	0	0	0	0	0	0	0	0	0	0	0	0
1194	118013	1.009	73.39	72.71	0.913	15.7	17.19	1.02	17.31	16.98	1.028	18.5	18	1.065	21.87	20.54	1.1288	43.0058	2	2	2	0	0	0	0	0	0	0	0	0	0	0	0	0	0	0	0	0	0	0	0	0	0	0	0	0	0	0	0
1195	118017	1.126	71.05	63.1	1.006	13.04	12.96	1.072	17.07	15.92	1.16	18.29	15.77	1.227	22.65	18.46	1.1314	48.0204	2	2	2	0	0	0	0	0	0	0	0	0	0	0	0	0	0	0	0	0	0	0	0	0	0	0	0	0	0	0	0
1196	118022	1.015	64.84	63.9	0.987	13.69	13.88	1.085	16.93	15.61	1.061	18.37	17.31	0.927	15.84	17.1	1.1406	47.6097	2	2	2	0	0	0	0	0	0	0	0	0	0	0	0	0	0	0	0	0	0	0	0	0	0	0	0	0	0	0	0
1197	118026	0.796	41.99	52.74	0.687	7.76	11.3	0.788	11.34	14.4	0.845	11.45	13.55	0.847	11.43	13.49	1.1471	43.781	2	2	2	0	0	0	0	0	0	0	0	0	0	0	0	0	0	0	0	0	0	0	0	0	0	0	0	0	0	0	0
1198	118031	0.684	40.71	59.54	0.617	7.64	12.38	0.648	9.26	14.28	0.708	10.78	15.21	0.738	13.04	17.67	1.146	41.7465	2	1	2	0	1	0	0	0	0	0	0	0	0	0	0	7	1	0	0	0	0	0	0	0	0	0	0	0	0	0	0
1199	118039	0.776	41.86	53.95	0.705	8.52	12.1	0.753	9.04	12.01	0.847	11.82	13.96	0.785	12.47	15.88	1.1412	47.0412	2	2	2	0	0	0	0	0	0	0	0	0	0	0	0	0	0	0	0	0	0	0	0	0	0	0	0	0	0	0	0
1200	118045	1.028	72.74	70.75	0.921	14.01	15.21	0.991	16.84	17	1.047	19.63	18.76	1.125	22.25	19.78	1.1339	47.6429	2	2	2	0	0	0	0	0	0	0	0	0	0	0	0	0	0	0	0	0	0	0	0	0	0	0	0	0	0	0	0
1201	118050	0.984	53.74	54.63	0.929	11.69	12.58	1.003	12.67	12.62	1.023	14.32	13.99	0.976	15.06	15.44	1.1422	41.4863	2	2	2	0	0	0	0	0	0	0	0	0	0	0	0	0	0	0	0	0	0	0	0	0	0	0	0	0	0	0	0
1202	118051	1.173	67.74	57.74	1.09	12.8	11.74	1.215	15.11	12.44	1.223	18.9	15.45	1.156	20.93	18.11	1.1482	40.4721	2	2	2	0	0	0	0	0	0	0	0	0	0	0	0	0	0	0	0	0	0	0	0	0	0	0	0	0	0	0	0
1203	118058	0.973	62.87	64.62	0.999	14.16	14.18	1.036	15.47	14.93	0.98	16.89	17.24	0.895	16.35	18.27	1.1231	45.2554	2	1	2	0	1	0	0	0	0	0	0	0	0	0	0	40	1	0	0	0	0	0	0	0	0	0	0	0	0	0	0
1204	118061	1.074	57.76	53.77	1.03	13.27	12.88	1.117	14.28	12.79	1.111	15.97	14.38	1.038	14.25	13.72	1.1284	41.9695	2	2	2	0	0	0	0	0	0	0	0	0	0	0	0	0	0	0	0	0	0	0	0	0	0	0	0	0	0	0	0
1205	118072	0.844	38.93	46.1	0.795	8.06	10.15	0.851	8.92	10.48	0.833	10.17	12.2	0.887	11.77	13.27	1.149	40.9298	2	2	2	0	0	0	0	0	0	0	0	0	0	0	0	0	0	0	0	0	0	0	0	0	0	0	0	0	0	0	0
1206	118079	1.689	111.18	65.81	1.591	22.03	13.84	1.707	25.8	15.11	1.75	30.78	17.58	1.691	32.58	19.27	1.122	46.1675	2	2	2	0	0	0	0	0	0	0	0	0	0	0	0	0	0	0	0	0	0	0	0	0	0	0	0	0	0	0	0
1207	118082	1.039	72.49	69.76	0.924	14.28	15.45	1.04	17.29	16.63	1.091	20.22	18.54	1.081	20.7	19.15	1.1489	41.4756	2	2	2	0	0	0	0	0	0	0	0	0	0	0	0	0	0	0	0	0	0	0	0	0	0	0	0	0	0	0	0
1208	118087	0.941	54.96	58.38	0.879	11.87	13.52	0.892	12.65	14.17	0.948	13.7	14.46	1.031	16.74	16.23	1.1505	41.0788	2	2	2	0	0	0	0	0	0	0	0	0	0	0	0	0	0	0	0	0	0	0	0	0	0	0	0	0	0	0	0
1209	118104	1.072	66.15	61.69	0.898	10.89	12.12	1.037	15.01	14.47	1.121	18.85	16.82	1.171	21.4	18.28	1.1501	38.7485	2	2	2	0	0	0	0	0	0	0	0	0	0	0	0	0	0	0	0	0	0	0	0	0	0	0	0	0	0	0	0
1210	118105	0.743	35.34	47.59	0.736	7.83	10.65	0.777	8.49	10.92	0.754	8.98	11.91	0.712	10.04	14.11	1.1307	45.6265	2	2	2	0	0	0	0	0	0	0	0	0	0	0	0	0	0	0	0	0	0	0	0	0	0	0	0	0	0	0	0
1211	118111	0.837	47.26	56.46	0.82	10.47	12.78	0.799	10.72	13.42	0.844	12.32	14.6	0.877	13.75	15.67	1.1305	44.0638	2	2	2	0	0	0	0	0	0	0	0	0	0	0	0	0	0	0	0	0	0	0	0	0	0	0	0	0	0	0	0
1212	118113	1.062	58.06	54.65	0.987	12.08	12.24	1.113	14.98	13.46	1.096	14.49	13.22	1.05	16.51	15.73	1.1278	44.7358	2	2	2	0	0	0	0	0	0	0	0	0	0	0	0	0	0	0	0	0	0	0	0	0	0	0	0	0	0	0	0
1213	118120	0.649	30.86	47.53	0.629	6.79	10.8	0.649	7.56	11.65	0.686	8.32	12.12	0.631	8.19	12.97	1.155	43.3419	2	2	2	0	0	0	0	0	0	0	0	0	0	0	0	0	0	0	0	0	0	0	0	0	0	0	0	0	0	0	0
1214	118123	1.145	69.67	60.84	1.165	15.45	13.26	1.169	18.96	16.21	1.183	17.38	14.69	1.073	17.89	16.68	1.12	44.4507	2	2	2	0	0	0	0	0	0	0	0	0	0	0	0	0	0	0	0	0	0	0	0	0	0	0	0	0	0	0	0
1215	118125	1.311	86.88	66.28	1.278	19.39	15.18	1.285	20.7	16.11	1.349	23.7	17.57	1.324	23.08	17.43	1.1228	40.9255	2	2	2	0	0	0	0	0	0	0	0	0	0	0	0	0	0	0	0	0	0	0	0	0	0	0	0	0	0	0	0
1216	118140	1.307	49.1	37.57	1.298	16.99	13.09	1.337	15.05	11.26	1.291	17.06	13.21	1.827	32.39	17.73	1.1222	47.5339	2	2	2	0	0	0	0	0	0	0	0	0	0	0	0	0	0	0	0	0	0	0	0	0	0	0	0	0	0	0	0
1217	118142	0.974	63.71	65.4	0.963	15.43	16.02	0.935	14.65	15.67	0.958	16.36	17.08	1.038	17.26	16.63	1.1309	40.3813	2	2	2	0	0	0	0	0	0	0	0	0	0	0	0	0	0	0	0	0	0	0	0	0	0	0	0	0	0	0	0
1218	118146	0.995	70.48	70.86	0.908	13.67	15.05	1.02	17.88	17.53	1.06	19.34	18.24	0.977	19.59	20.05	1.1505	41.5091	2	2	2	0	0	0	0	0	0	0	0	0	0	0	0	0	0	0	0	0	0	0	0	0	0	0	0	0	0	0	0
1219	118150	0.771	48.7	63.14	0.768	10	13.02	0.777	11.66	15.01	0.811	13.63	16.81	0.733	13.41	18.3	1.1527	44.7328	2	2	2	0	0	0	0	0	0	0	0	0	0	0	0	0	0	0	0	0	0	0	0	0	0	0	0	0	0	0	0
1220	118162	0.845	50.89	60.21	0.813	9.45	11.63	0.807	10.7	13.25	0.929	14.85	15.99	0.822	15.89	19.34	1.1341	45.045	2	1	2	0	2	0	0	0	0	0	0	0	0	0	0	30	1	0	50	2	1	0	0	0	0	0	0	0	0	0	0
1221	118207	1.441	79.94	55.49	1.375	17.87	12.99	1.422	18.89	13.28	1.519	20.71	13.64	1.442	22.46	15.57	1.1446	40.6542	2	2	2	0	0	0	0	0	0	0	0	0	0	0	0	0	0	0	0	0	0	0	0	0	0	0	0	0	0	0	0
1222	118210	0.869	48.36	55.65	0.869	10.84	12.47	0.919	11.77	12.81	0.84	13.33	15.87	0.857	12.42	14.5	1.146	41.0375	2	2	2	0	0	0	0	0	0	0	0	0	0	0	0	0	0	0	0	0	0	0	0	0	0	0	0	0	0	0	0
1223	118211	1.034	56.16	54.32	1.026	13.16	12.82	0.989	12.34	12.48	1.036	14.71	14.2	1.076	15.95	14.82	1.136	46.4818	2	2	2	0	0	0	0	0	0	0	0	0	0	0	0	0	0	0	0	0	0	0	0	0	0	0	0	0	0	0	0
1224	118216	1.04	53.09	51.02	0.962	10.51	10.92	0.997	12.16	12.19	1.062	13.93	13.12	1.115	16.49	14.79	1.1524	44.1159	2	2	2	0	0	0	0	0	0	0	0	0	0	0	0	0	0	0	0	0	0	0	0	0	0	0	0	0	0	0	0
1225	118226	1.043	61.55	59.03	0.938	11.62	12.39	1.074	15.51	14.45	1.071	16.34	15.26	1.068	18.08	16.92	1.1531	43.1023	2	1	2	0	3	0	0	0	0	0	0	0	0	0	0	8	1	0	35	1	0	57	2	2	0	0	0	0	0	0	0
1226	118229	1.026	56.94	55.47	1.006	14.95	14.86	1.078	15.74	14.61	0.996	14.64	14.69	1.027	11.61	11.31	1.1297	45.9755	2	2	2	0	0	0	0	0	0	0	0	0	0	0	0	0	0	0	0	0	0	0	0	0	0	0	0	0	0	0	0
1227	118240	1.304	66.88	51.27	1.184	14.01	11.84	1.288	14.19	11.02	1.401	18.46	13.18	1.326	20.21	15.24	1.1261	40.8315	2	2	2	0	0	0	0	0	0	0	0	0	0	0	0	0	0	0	0	0	0	0	0	0	0	0	0	0	0	0	0
1228	118248	1.101	68.59	62.3	0.979	13.19	13.47	1.097	15.34	13.99	1.18	19.23	16.3	1.123	20.82	18.55	1.1356	45.6687	2	2	2	0	0	0	0	0	0	0	0	0	0	0	0	0	0	0	0	0	0	0	0	0	0	0	0	0	0	0	0
1229	118254	0.879	42.28	48.12	0.877	9.78	11.15	0.832	9.71	11.67	0.875	10.2	11.66	0.924	12.59	13.63	1.1425	46.922	2	2	2	0	0	0	0	0	0	0	0	0	0	0	0	0	0	0	0	0	0	0	0	0	0	0	0	0	0	0	0
1230	118266	0.955	65.43	68.49	0.893	14.11	15.8	0.908	15.97	17.58	1.012	17.48	17.28	1.003	17.88	17.83	1.1327	43.6215	2	2	2	0	0	0	0	0	0	0	0	0	0	0	0	0	0	0	0	0	0	0	0	0	0	0	0	0	0	0	0
1231	118271	0.973	55.96	57.49	0.881	11.41	12.96	0.958	12.96	13.54	1.023	15.75	15.4	1.015	15.83	15.59	1.1183	38.7178	2	2	2	0	0	0	0	0	0	0	0	0	0	0	0	0	0	0	0	0	0	0	0	0	0	0	0	0	0	0	0
1232	118279	1.14	71.54	62.74	1.067	15.61	14.63	1.165	17.02	14.62	1.151	19.2	16.68	1.171	19.7	16.82	1.138	43.0303	2	2	2	0	0	0	0	0	0	0	0	0	0	0	0	0	0	0	0	0	0	0	0	0	0	0	0	0	0	0	0
1233	118293	1.059	68.31	64.49	0.994	13.37	13.45	1.07	16.95	15.84	1.098	20.07	18.27	1.058	17.92	16.93	1.1327	40.6387	2	2	2	0	0	0	0	0	0	0	0	0	0	0	0	0	0	0	0	0	0	0	0	0	0	0	0	0	0	0	0
1234	118295	0.736	45.91	62.39	0.679	9.38	13.81	0.726	11.03	15.21	0.755	12.34	16.35	0.773	13.15	17.02	1.1351	49.059	2	2	2	0	0	0	0	0	0	0	0	0	0	0	0	0	0	0	0	0	0	0	0	0	0	0	0	0	0	0	0
1235	118296	0.699	37.49	53.65	0.675	7.96	11.79	0.628	7.78	12.4	0.725	10.31	14.22	0.751	11.44	15.24	1.145	40.8876	2	2	2	0	0	0	0	0	0	0	0	0	0	0	0	0	0	0	0	0	0	0	0	0	0	0	0	0	0	0	0
1236	118298	1.31	93.9	71.68	1.292	21.34	16.52	1.342	21.69	16.16	1.292	21.1	16.34	1.314	29.78	22.66	1.1469	40.9218	2	1	2	0	1	0	0	0	0	0	0	0	0	0	0	13	1	0	0	0	0	0	0	0	0	0	0	0	0	0	0
1237	118308	0.776	43.57	56.13	0.684	8.81	12.88	0.802	11.85	14.78	0.814	11.54	14.17	0.795	11.36	14.3	1.1478	41.6555	1	2	2	1	0	0	65	2	2	0	0	0	0	0	0	0	0	0	0	0	0	0	0	0	0	0	0	0	0	0	0
1238	118322	1.213	60.92	50.2	1.131	12.12	10.72	1.237	18.11	14.64	1.208	14.27	11.81	1.26	16.43	13.05	1.1355	48.0577	2	2	2	0	0	0	0	0	0	0	0	0	0	0	0	0	0	0	0	0	0	0	0	0	0	0	0	0	0	0	0
1239	118324	0.86	45.24	52.63	0.819	8.89	10.86	0.877	11.29	12.88	0.848	11.13	13.13	0.883	13.92	15.77	1.1466	43.6655	2	2	2	0	0	0	0	0	0	0	0	0	0	0	0	0	0	0	0	0	0	0	0	0	0	0	0	0	0	0	0
1240	118330	0.963	70.98	73.73	0.923	14.44	15.64	0.959	16.41	17.11	1.001	19.42	19.4	0.96	20.71	21.57	1.1404	39.8125	2	1	2	0	1	0	0	0	0	0	0	0	0	0	0	16	1	0	0	0	0	0	0	0	0	0	0	0	0	0	0
1241	118333	0.971	51.4	52.93	0.909	10.67	11.74	0.947	11.79	12.46	1.02	13.85	13.58	0.996	15.09	15.15	1.1298	45.5156	2	2	2	0	0	0	0	0	0	0	0	0	0	0	0	0	0	0	0	0	0	0	0	0	0	0	0	0	0	0	0
1242	118348	0.989	50.89	51.45	0.899	8.78	9.76	0.977	12.27	12.57	1.013	14.84	14.65	1.037	15	14.47	1.1405	48.8692	2	2	2	0	0	0	0	0	0	0	0	0	0	0	0	0	0	0	0	0	0	0	0	0	0	0	0	0	0	0	0
1243	118350	0.869	46.54	53.56	0.813	10.8	13.28	0.834	9.52	11.41	0.88	11.78	13.39	0.933	14.43	15.48	1.1335	44.0293	2	2	2	0	0	0	0	0	0	0	0	0	0	0	0	0	0	0	0	0	0	0	0	0	0	0	0	0	0	0	0
1244	118358	1.128	80.67	71.55	1.008	16.65	16.52	1.129	19.17	16.99	1.216	22.36	18.39	1.144	22.49	19.65	1.1295	46.3924	2	2	2	0	0	0	0	0	0	0	0	0	0	0	0	0	0	0	0	0	0	0	0	0	0	0	0	0	0	0	0
1245	118361	0.745	38.58	51.78	0.766	9.2	12	0.716	8.38	11.69	0.719	9.94	13.82	0.776	11.07	14.27	1.1395	47.2366	2	1	2	0	1	0	0	0	0	0	0	0	0	0	0	80	2	1	0	0	0	0	0	0	0	0	0	0	0	0	0
1246	118362	0.888	41.95	47.26	0.848	9.72	11.46	0.906	9.57	10.57	0.88	9.95	11.3	0.912	12.71	13.93	1.1312	44.769	2	2	2	0	0	0	0	0	0	0	0	0	0	0	0	0	0	0	0	0	0	0	0	0	0	0	0	0	0	0	0
1247	118380	1.573	132.44	84.19	1.504	26.96	17.93	1.531	27.96	18.27	1.629	38.24	23.47	1.602	39.28	24.53	1.1374	42.944	2	2	2	0	0	0	0	0	0	0	0	0	0	0	0	0	0	0	0	0	0	0	0	0	0	0	0	0	0	0	0
1248	118381	0.895	45.8	51.17	0.88	10.83	12.3	0.838	9.15	10.93	0.906	12.41	13.69	0.941	13.41	14.25	1.1352	44.5489	2	2	2	0	0	0	0	0	0	0	0	0	0	0	0	0	0	0	0	0	0	0	0	0	0	0	0	0	0	0	0
1249	118382	1.336	106.16	79.49	1.366	28.72	21.02	1.425	23.29	16.34	1.324	25.86	19.54	1.253	28.29	22.59	1.1347	46.3075	2	2	2	0	0	0	0	0	0	0	0	0	0	0	0	0	0	0	0	0	0	0	0	0	0	0	0	0	0	0	0
1250	118387	1.065	72.48	68.05	1.006	15.01	14.93	1.056	17.79	16.85	1.055	17.9	16.97	1.128	21.77	19.3	1.1357	46.9058	2	2	2	0	0	0	0	0	0	0	0	0	0	0	0	0	0	0	0	0	0	0	0	0	0	0	0	0	0	0	0
1251	118393	1.158	52.69	45.49	1.176	13.97	11.88	1.15	13.59	11.82	1.107	11.74	10.6	1.197	13.38	11.18	1.1312	47.8413	2	2	2	0	0	0	0	0	0	0	0	0	0	0	0	0	0	0	0	0	0	0	0	0	0	0	0	0	0	0	0
1252	118395	0.867	39.66	45.75	0.859	9.15	10.65	0.85	9.19	10.82	0.859	9.84	11.46	0.895	11.48	12.82	1.1504	40.9232	2	2	2	0	0	0	0	0	0	0	0	0	0	0	0	0	0	0	0	0	0	0	0	0	0	0	0	0	0	0	0
1253	118396	0.793	44.12	55.67	0.725	8.27	11.41	0.772	9.48	12.28	0.798	10.58	13.25	0.844	15.79	18.71	1.1324	47.6279	2	2	2	0	0	0	0	0	0	0	0	0	0	0	0	0	0	0	0	0	0	0	0	0	0	0	0	0	0	0	0
1254	118399	1.096	71.94	65.61	1.006	15.35	15.27	1.099	16.9	15.38	1.174	19.31	16.45	1.1	20.38	18.52	1.1322	44.4025	2	1	2	0	2	0	0	0	0	0	0	0	0	0	0	35	1	0	40	1	0	0	0	0	0	0	0	0	0	0	0
1255	118407	1.01	48.68	48.19	0.976	10.04	10.29	1.003	11.44	11.41	1.022	13.88	13.58	1.032	13.31	12.91	1.135	46.9879	2	2	2	0	0	0	0	0	0	0	0	0	0	0	0	0	0	0	0	0	0	0	0	0	0	0	0	0	0	0	0
1256	118412	1.044	57.46	55.06	0.959	12.58	13.11	1.082	13.31	12.29	1.084	15.07	13.9	1.048	16.51	15.75	1.1344	45.7534	2	2	2	0	0	0	0	0	0	0	0	0	0	0	0	0	0	0	0	0	0	0	0	0	0	0	0	0	0	0	0
1257	118435	1.085	62.18	57.3	0.954	11.73	12.29	1.066	16.02	15.03	1.129	15.97	14.14	1.166	18.46	15.83	1.1281	42.0522	2	2	2	0	0	0	0	0	0	0	0	0	0	0	0	0	0	0	0	0	0	0	0	0	0	0	0	0	0	0	0
1258	118437	0.756	50.74	67.08	0.679	10.65	15.7	0.701	11.85	16.92	0.775	13.92	17.97	0.868	14.32	16.5	1.1354	37.1941	2	1	2	0	1	0	0	0	0	0	0	0	0	0	0	53	2	1	0	0	0	0	0	0	0	0	0	0	0	0	0
1259	118449	1.008	71.54	70.98	0.891	14.58	16.36	1.025	17.57	17.15	1.117	19.96	17.86	0.99	19.43	19.62	1.1355	45.893	2	2	2	0	0	0	0	0	0	0	0	0	0	0	0	0	0	0	0	0	0	0	0	0	0	0	0	0	0	0	0
1260	118458	0.811	48.83	60.18	0.721	9.7	13.45	0.79	11.38	14.4	0.928	14.99	16.16	0.788	12.75	16.17	1.136	49.4784	2	2	2	0	0	0	0	0	0	0	0	0	0	0	0	0	0	0	0	0	0	0	0	0	0	0	0	0	0	0	0
1261	118463	1.547	104.16	67.34	1.511	23.61	15.63	1.579	20.43	12.94	1.583	27.43	17.33	1.525	32.69	21.44	1.1326	44.7951	2	2	2	0	0	0	0	0	0	0	0	0	0	0	0	0	0	0	0	0	0	0	0	0	0	0	0	0	0	0	0
1262	118471	0.752	46.12	61.35	0.757	9.32	12.33	0.698	11.27	16.16	0.782	13.58	17.37	0.771	11.94	15.49	1.1442	38.7947	2	2	1	0	0	1	0	0	0	0	0	0	0	0	0	0	0	0	0	0	0	0	0	0	0	0	0	0	0	0	0
1263	118479	0.698	47.79	68.5	0.69	10.52	15.24	0.719	11.62	16.16	0.679	12.62	18.6	0.705	13.03	18.49	1.1421	39.7049	2	2	2	0	0	0	0	0	0	0	0	0	0	0	0	0	0	0	0	0	0	0	0	0	0	0	0	0	0	0	0
1264	118491	1.072	63.56	59.27	0.956	14.67	15.35	1.076	16.62	15.44	1.109	18.32	16.52	1.166	13.95	11.96	1.122	46.6724	2	2	2	0	0	0	0	0	0	0	0	0	0	0	0	0	0	0	0	0	0	0	0	0	0	0	0	0	0	0	0
1265	118496	1.02	60.68	59.48	1.044	13.25	12.69	1.016	13.77	13.56	0.988	15.11	15.3	1.034	18.55	17.93	1.155	37.9044	2	2	2	0	0	0	0	0	0	0	0	0	0	0	0	0	0	0	0	0	0	0	0	0	0	0	0	0	0	0	0
1266	118500	0.994	66.22	66.63	0.907	14.64	16.14	0.996	14.89	14.95	0.99	16.48	16.65	1.07	20.2	18.89	1.1232	40.7724	2	2	2	0	0	0	0	0	0	0	0	0	0	0	0	0	0	0	0	0	0	0	0	0	0	0	0	0	0	0	0
1267	118505	1.017	54.01	53.12	0.851	10.44	12.27	0.982	12.38	12.61	1.096	14.97	13.66	1.113	16.22	14.58	1.1444	42.0582	2	2	2	0	0	0	0	0	0	0	0	0	0	0	0	0	0	0	0	0	0	0	0	0	0	0	0	0	0	0	0
1268	118515	1.722	141.42	82.14	1.632	30.43	18.65	1.707	32.74	19.18	1.78	38.77	21.78	1.753	39.47	22.52	1.1261	45.6294	2	1	2	0	1	0	0	0	0	0	0	0	0	0	0	48	1	0	0	0	0	0	0	0	0	0	0	0	0	0	0
1269	118520	0.898	48.64	54.15	0.822	10.36	12.61	0.875	12.06	13.78	0.988	13.33	13.49	0.904	12.89	14.26	1.1366	45.4341	2	2	2	0	0	0	0	0	0	0	0	0	0	0	0	0	0	0	0	0	0	0	0	0	0	0	0	0	0	0	0
1270	118523	0.779	42.08	54.04	0.744	9.08	12.2	0.828	11.6	14.01	0.779	10.77	13.82	0.759	10.62	14	1.1311	47.6447	2	2	2	0	0	0	0	0	0	0	0	0	0	0	0	0	0	0	0	0	0	0	0	0	0	0	0	0	0	0	0
1271	118536	0.973	59.16	60.83	0.908	12.68	13.96	0.973	13.81	14.2	1.014	15.75	15.53	0.987	16.92	17.14	1.1472	42.1636	2	2	2	0	0	0	0	0	0	0	0	0	0	0	0	0	0	0	0	0	0	0	0	0	0	0	0	0	0	0	0
1272	118553	0.777	42.65	54.9	0.685	7.95	11.62	0.709	8.22	11.59	0.854	12.84	15.03	0.819	13.64	16.66	1.1595	46.489	2	2	2	0	0	0	0	0	0	0	0	0	0	0	0	0	0	0	0	0	0	0	0	0	0	0	0	0	0	0	0
1273	118563	1.059	75.45	71.28	0.981	16.35	16.66	0.995	18.59	18.69	1.094	19.17	17.52	1.16	21.34	18.4	1.1276	40.2676	2	1	1	0	3	1	0	0	0	0	0	0	0	0	0	14	1	0	16	1	0	16	1	0	0	0	0	0	0	0	0
1274	118564	1.038	65.93	63.51	1.088	16.39	15.07	1.024	16.2	15.82	1.012	16.02	15.84	1.032	17.31	16.78	1.1541	40.0956	2	2	2	0	0	0	0	0	0	0	0	0	0	0	0	0	0	0	0	0	0	0	0	0	0	0	0	0	0	0	0
1275	118565	0.868	43.09	49.66	0.853	10.58	12.4	0.891	9.18	10.3	0.865	11.04	12.76	0.866	12.29	14.2	1.1503	42.564	2	2	2	0	0	0	0	0	0	0	0	0	0	0	0	0	0	0	0	0	0	0	0	0	0	0	0	0	0	0	0
1276	118571	0.849	44.15	52.01	0.79	9.38	11.89	0.813	10.09	12.41	0.893	12	13.45	0.888	12.67	14.27	1.1486	44.2585	2	2	2	0	0	0	0	0	0	0	0	0	0	0	0	0	0	0	0	0	0	0	0	0	0	0	0	0	0	0	0
1277	118573	1.221	83.9	68.71	1.112	16.42	14.77	1.216	20.58	16.92	1.288	23	17.86	1.248	23.9	19.15	1.134	44.8546	2	2	2	0	0	0	0	0	0	0	0	0	0	0	0	0	0	0	0	0	0	0	0	0	0	0	0	0	0	0	0
1278	118576	0.99	70.77	71.46	0.972	15.49	15.93	1.015	17.07	16.82	1.008	19.3	19.16	0.967	18.91	19.55	1.1509	42.2762	2	2	2	0	0	0	0	0	0	0	0	0	0	0	0	0	0	0	0	0	0	0	0	0	0	0	0	0	0	0	0
1279	118578	1.038	72.58	69.92	1.021	16.26	15.93	1.034	18.21	17.62	1.064	19.53	18.35	1.031	18.58	18.03	1.1442	39.0415	2	2	2	0	0	0	0	0	0	0	0	0	0	0	0	0	0	0	0	0	0	0	0	0	0	0	0	0	0	0	0
1280	118581	1.186	85.42	72.04	1.119	18.46	16.49	1.157	20.2	17.46	1.181	20.37	17.26	1.267	26.39	20.83	1.1439	37.7666	2	2	2	0	0	0	0	0	0	0	0	0	0	0	0	0	0	0	0	0	0	0	0	0	0	0	0	0	0	0	0
1281	118587	0.766	36.1	47.16	0.803	8.7	10.83	0.777	9	11.58	0.792	9.45	11.93	0.699	8.96	12.82	1.153	43.8776	2	2	2	0	0	0	0	0	0	0	0	0	0	0	0	0	0	0	0	0	0	0	0	0	0	0	0	0	0	0	0
1282	118592	1.149	78.52	68.33	1.048	15.43	14.73	1.142	19.16	16.78	1.273	24.43	19.2	1.106	19.5	17.63	1.1497	41.3696	2	2	2	0	0	0	0	0	0	0	0	0	0	0	0	0	0	0	0	0	0	0	0	0	0	0	0	0	0	0	0
1283	118599	1.56	107.13	68.68	1.459	22.32	15.3	1.558	25.21	16.18	1.62	27.56	17.02	1.587	32.03	20.19	1.134	42.9801	2	2	2	0	0	0	0	0	0	0	0	0	0	0	0	0	0	0	0	0	0	0	0	0	0	0	0	0	0	0	0
1284	118602	1.332	76.61	57.53	1.307	20.31	15.54	1.335	17.66	13.23	1.357	19.34	14.26	1.331	19.3	14.5	1.1425	38.4839	2	2	2	0	0	0	0	0	0	0	0	0	0	0	0	0	0	0	0	0	0	0	0	0	0	0	0	0	0	0	0
1285	118609	0.824	43.2	52.43	0.786	9.18	11.68	0.793	9.49	11.96	0.86	11.74	13.66	0.845	12.8	15.14	1.1577	44.7076	2	2	2	0	0	0	0	0	0	0	0	0	0	0	0	0	0	0	0	0	0	0	0	0	0	0	0	0	0	0	0
1286	118611	1.167	75.25	64.46	1.121	16.69	14.88	1.094	16.65	15.22	1.23	21.3	17.32	1.209	20.61	17.05	1.1324	46.3306	2	2	2	0	0	0	0	0	0	0	0	0	0	0	0	0	0	0	0	0	0	0	0	0	0	0	0	0	0	0	0
1287	118614	0.824	37.75	45.83	0.766	7.19	9.39	0.79	8.07	10.22	0.886	10.59	11.96	0.834	11.9	14.27	1.1439	40.0221	2	2	2	0	0	0	0	0	0	0	0	0	0	0	0	0	0	0	0	0	0	0	0	0	0	0	0	0	0	0	0
1288	118620	0.901	47.03	52.22	0.92	11.48	12.47	0.921	10.64	11.56	0.895	11.97	13.37	0.873	12.94	14.82	1.1365	46.6391	2	1	2	0	1	0	0	0	0	0	0	0	0	0	0	13	1	0	0	0	0	0	0	0	0	0	0	0	0	0	0
1289	118623	0.931	64.45	69.26	0.867	13.24	15.28	0.913	15.92	17.43	0.959	16.43	17.14	0.971	18.86	19.42	1.1328	44.4983	2	2	2	0	0	0	0	0	0	0	0	0	0	0	0	0	0	0	0	0	0	0	0	0	0	0	0	0	0	0	0
1290	118634	0.89	50.86	57.17	0.878	10.62	12.09	0.875	11.72	13.39	0.95	14.21	14.95	0.856	14.32	16.73	1.1488	44.0326	2	2	2	0	0	0	0	0	0	0	0	0	0	0	0	0	0	0	0	0	0	0	0	0	0	0	0	0	0	0	0
1291	118647	0.992	49.2	49.6	0.886	9.52	10.75	0.939	11.68	12.44	1.052	15.39	14.62	1.07	12.61	11.78	1.1514	40.7594	2	2	2	0	0	0	0	0	0	0	0	0	0	0	0	0	0	0	0	0	0	0	0	0	0	0	0	0	0	0	0
1292	118651	1.097	62.01	56.51	0.926	11.02	11.9	1.095	14.64	13.36	1.145	16.61	14.51	1.18	19.74	16.73	1.1506	40.1045	2	2	2	0	0	0	0	0	0	0	0	0	0	0	0	0	0	0	0	0	0	0	0	0	0	0	0	0	0	0	0
1293	118665	1.091	75.41	69.12	1.05	16.65	15.85	1.132	17.37	15.35	1.153	19.68	17.06	1.041	21.71	20.86	1.1509	39.854	1	2	2	1	0	0	55	2	3	0	0	0	0	0	0	0	0	0	0	0	0	0	0	0	0	0	0	0	0	0	0
1294	118671	0.949	53.41	56.25	0.856	10.88	12.72	0.963	12.01	12.48	1.012	14.97	14.8	0.956	15.54	16.26	1.1452	42.2163	2	2	2	0	0	0	0	0	0	0	0	0	0	0	0	0	0	0	0	0	0	0	0	0	0	0	0	0	0	0	0
1295	118690	0.742	45.54	61.38	0.733	8.9	12.14	0.781	11.49	14.72	0.762	12.49	16.39	0.698	12.66	18.13	1.1317	43.3994	2	2	2	0	0	0	0	0	0	0	0	0	0	0	0	0	0	0	0	0	0	0	0	0	0	0	0	0	0	0	0
1296	118692	1.198	68.77	57.41	1.219	13.75	11.28	1.151	15.97	13.88	1.191	17.4	14.61	1.228	21.66	17.64	1.1375	38.1542	2	2	2	0	0	0	0	0	0	0	0	0	0	0	0	0	0	0	0	0	0	0	0	0	0	0	0	0	0	0	0
1297	118693	0.875	56.93	65.09	0.814	12.08	14.84	0.848	12.86	15.16	0.92	15.25	16.57	0.903	16.73	18.52	1.1529	43.3509	2	2	2	0	0	0	0	0	0	0	0	0	0	0	0	0	0	0	0	0	0	0	0	0	0	0	0	0	0	0	0
1298	118699	0.68	35.61	52.34	0.739	9.27	12.55	0.685	8.4	12.26	0.661	8.75	13.23	0.643	9.19	14.3	1.1357	47.8308	2	2	2	0	0	0	0	0	0	0	0	0	0	0	0	0	0	0	0	0	0	0	0	0	0	0	0	0	0	0	0
1299	118713	0.845	47.29	55.95	0.763	9.25	12.13	0.788	9.81	12.44	0.858	12.81	14.93	0.938	15.43	16.45	1.1527	43.2668	2	2	1	0	0	1	0	0	0	0	0	0	0	0	0	0	0	0	0	0	0	0	0	0	0	0	0	0	0	0	0
1300	118722	1.077	54.32	50.42	1.013	10.81	10.67	1.083	11.76	10.86	1.101	13.47	12.24	1.098	18.28	16.65	1.141	39.5595	2	2	2	0	0	0	0	0	0	0	0	0	0	0	0	0	0	0	0	0	0	0	0	0	0	0	0	0	0	0	0
1301	118727	0.881	51.87	58.89	0.844	10.98	13	0.849	12.16	14.33	0.89	13.58	15.26	0.929	15.15	16.3	1.1324	48.0901	2	2	2	0	0	0	0	0	0	0	0	0	0	0	0	0	0	0	0	0	0	0	0	0	0	0	0	0	0	0	0
1302	118732	1.129	58.2	51.54	1.07	12.22	11.41	1.126	14.24	12.65	1.115	16.52	14.81	1.202	15.22	12.67	1.1486	42.9464	2	2	2	0	0	0	0	0	0	0	0	0	0	0	0	0	0	0	0	0	0	0	0	0	0	0	0	0	0	0	0
1303	118740	1.07	73.8	68.96	0.992	14	14.11	1.065	17.89	16.8	1.091	19.83	18.17	1.111	22.08	19.87	1.1381	47.1114	2	2	1	0	0	1	0	0	0	0	0	0	0	0	0	0	0	0	0	0	0	0	0	0	0	0	0	0	0	0	0
1304	118753	1.2	72.86	60.73	1.113	15.01	13.49	1.209	17.31	14.32	1.254	20.58	16.42	1.209	19.96	16.51	1.1294	41.6738	2	2	2	0	0	0	0	0	0	0	0	0	0	0	0	0	0	0	0	0	0	0	0	0	0	0	0	0	0	0	0
1305	118758	0.85	53.07	62.43	0.862	11.56	13.4	0.823	11.36	13.81	0.856	13.86	16.19	0.856	16.29	19.02	1.1554	41.0225	2	1	2	0	1	0	0	0	0	0	0	0	0	0	0	30	1	0	0	0	0	0	0	0	0	0	0	0	0	0	0
1306	118767	0.626	36.62	58.5	0.608	7.92	13.01	0.64	9	14.07	0.647	10.52	16.25	0.606	9.19	15.16	1.1491	44.764	2	2	2	0	0	0	0	0	0	0	0	0	0	0	0	0	0	0	0	0	0	0	0	0	0	0	0	0	0	0	0
1307	118769	1.18	92.51	78.42	1.099	17.59	16	1.155	21.99	19.04	1.208	25.14	20.81	1.231	27.8	22.58	1.1353	42.8008	2	2	2	0	0	0	0	0	0	0	0	0	0	0	0	0	0	0	0	0	0	0	0	0	0	0	0	0	0	0	0
1308	118775	0.934	49.61	53.1	0.898	10.37	11.56	0.971	12.7	13.07	0.936	12.79	13.66	0.929	13.75	14.81	1.1315	47.2793	2	2	2	0	0	0	0	0	0	0	0	0	0	0	0	0	0	0	0	0	0	0	0	0	0	0	0	0	0	0	0
1309	118776	0.808	53.97	66.76	0.827	12	14.52	0.77	12.27	15.92	0.778	14.03	18.03	0.857	15.68	18.29	1.127	42.6594	2	2	2	0	0	0	0	0	0	0	0	0	0	0	0	0	0	0	0	0	0	0	0	0	0	0	0	0	0	0	0
1310	118796	1.426	109.46	76.79	1.431	24.63	17.21	1.38	26.12	18.92	1.435	28.72	20.01	1.453	30	20.64	1.1284	44.9234	2	2	2	0	0	0	0	0	0	0	0	0	0	0	0	0	0	0	0	0	0	0	0	0	0	0	0	0	0	0	0
1311	118809	0.933	45.8	49.12	0.841	9.01	10.72	0.791	9.45	11.95	0.923	12.02	13.02	1.141	15.32	13.42	1.144	39.5676	2	2	2	0	0	0	0	0	0	0	0	0	0	0	0	0	0	0	0	0	0	0	0	0	0	0	0	0	0	0	0
1312	118829	1.119	74.97	67.03	1.018	16.62	16.33	1.078	16.5	15.31	1.176	21.09	17.94	1.189	20.76	17.46	1.1314	41.5384	2	2	2	0	0	0	0	0	0	0	0	0	0	0	0	0	0	0	0	0	0	0	0	0	0	0	0	0	0	0	0
1313	118845	1.088	71.75	65.97	1.083	16.47	15.22	1.132	18.86	16.66	1.097	18.09	16.49	1.041	18.33	17.6	1.1206	46.4353	2	2	2	0	0	0	0	0	0	0	0	0	0	0	0	0	0	0	0	0	0	0	0	0	0	0	0	0	0	0	0
1314	118857	0.839	40.67	48.46	0.681	7.84	11.51	0.81	8.59	10.61	0.918	11.48	12.5	0.921	12.76	13.85	1.1332	45.0661	2	2	2	0	0	0	0	0	0	0	0	0	0	0	0	0	0	0	0	0	0	0	0	0	0	0	0	0	0	0	0
1315	118861	0.989	57.27	57.91	0.927	11.18	12.06	0.977	13.88	14.2	1.026	14.94	14.56	1.011	17.28	17.09	1.1461	39.9517	2	2	2	0	0	0	0	0	0	0	0	0	0	0	0	0	0	0	0	0	0	0	0	0	0	0	0	0	0	0	0
1316	118862	0.736	42.73	58.02	0.732	9.93	13.57	0.778	10.98	14.13	0.731	10.82	14.8	0.708	11	15.53	1.1395	48.8998	2	2	2	0	0	0	0	0	0	0	0	0	0	0	0	0	0	0	0	0	0	0	0	0	0	0	0	0	0	0	0
1317	118863	1.123	73.7	65.6	1.074	14.2	13.22	1.17	19.79	16.92	1.186	20	16.87	1.06	19.7	18.58	1.1475	41.2403	2	2	2	0	0	0	0	0	0	0	0	0	0	0	0	0	0	0	0	0	0	0	0	0	0	0	0	0	0	0	0
1318	118864	1.135	73.53	64.77	1.03	14.09	13.68	1.084	18.36	16.93	1.189	20.64	17.36	1.217	20.43	16.79	1.1347	43.5367	2	1	2	0	1	0	0	0	0	0	0	0	0	0	0	14	1	0	0	0	0	0	0	0	0	0	0	0	0	0	0
1319	118872	1.103	97.1	88.02	1.065	19.3	18.12	1.133	22.92	20.23	1.109	25.91	23.37	1.101	28.97	26.31	1.1384	39.6567	2	2	2	0	0	0	0	0	0	0	0	0	0	0	0	0	0	0	0	0	0	0	0	0	0	0	0	0	0	0	0
1320	118873	1.117	70.94	63.53	1.077	16.63	15.44	1.138	17.88	15.71	1.119	17.39	15.55	1.131	19.04	16.84	1.1442	42.386	2	2	2	0	0	0	0	0	0	0	0	0	0	0	0	0	0	0	0	0	0	0	0	0	0	0	0	0	0	0	0
1321	118877	1.006	46.48	46.21	0.928	9.61	10.35	0.984	10.34	10.5	1.079	13.86	12.84	1.013	12.68	12.52	1.1376	43.191	2	2	2	0	0	0	0	0	0	0	0	0	0	0	0	0	0	0	0	0	0	0	0	0	0	0	0	0	0	0	0
1322	118887	0.902	46.67	51.73	0.845	9.61	11.37	0.88	12.38	14.07	0.949	13.06	13.77	0.928	11.61	12.52	1.1387	46.8977	2	2	2	0	0	0	0	0	0	0	0	0	0	0	0	0	0	0	0	0	0	0	0	0	0	0	0	0	0	0	0
1323	118890	0.898	56.74	63.15	0.835	11.36	13.61	0.9	13.64	15.15	0.894	14.55	16.27	0.949	17.19	18.12	1.146	39.135	2	2	2	0	0	0	0	0	0	0	0	0	0	0	0	0	0	0	0	0	0	0	0	0	0	0	0	0	0	0	0
1324	118894	0.992	47.88	48.26	0.955	10.21	10.69	1.02	10.87	10.66	1.042	12.59	12.09	0.958	14.21	14.83	1.1299	44.7967	2	2	2	0	0	0	0	0	0	0	0	0	0	0	0	0	0	0	0	0	0	0	0	0	0	0	0	0	0	0	0
1325	118903	1.087	70.73	65.06	1.009	15.12	14.99	1.088	15.85	14.56	1.171	19.67	16.8	1.074	20.09	18.7	1.1321	44.9214	2	1	2	0	1	0	0	0	0	0	0	0	0	0	0	7	1	0	0	0	0	0	0	0	0	0	0	0	0	0	0
1326	118914	0.924	61.79	66.9	0.95	14.33	15.09	0.926	14.5	15.65	0.909	15.82	17.4	0.914	17.13	18.75	1.1341	46.3652	2	2	2	0	0	0	0	0	0	0	0	0	0	0	0	0	0	0	0	0	0	0	0	0	0	0	0	0	0	0	0
1327	118915	0.865	42.65	49.33	0.783	8.65	11.04	0.86	11.08	12.88	0.891	10.89	12.22	0.913	12.04	13.18	1.1493	44.6256	2	2	2	0	0	0	0	0	0	0	0	0	0	0	0	0	0	0	0	0	0	0	0	0	0	0	0	0	0	0	0
1328	118922	0.991	52.99	53.44	0.875	10.67	12.2	1.01	13.37	13.23	1.022	13.4	13.12	1.044	15.55	14.9	1.1302	46.3672	2	2	2	0	0	0	0	0	0	0	0	0	0	0	0	0	0	0	0	0	0	0	0	0	0	0	0	0	0	0	0
1329	118935	0.938	62.29	66.4	0.959	14.09	14.7	0.939	14.41	15.35	0.889	15.35	17.27	0.966	18.43	19.08	1.143	37.753	1	2	2	1	0	0	40	1	0	0	0	0	0	0	0	0	0	0	0	0	0	0	0	0	0	0	0	0	0	0	0
1330	118940	1.111	97.51	87.8	0.923	19.41	21.04	1.044	22.03	21.1	1.189	24.89	20.93	1.261	31.18	24.73	1.1348	44.6303	2	2	2	0	0	0	0	0	0	0	0	0	0	0	0	0	0	0	0	0	0	0	0	0	0	0	0	0	0	0	0
1331	118944	0.91	56.44	62.03	0.889	13.18	14.82	0.956	14.21	14.87	0.925	14.13	15.27	0.874	14.92	17.07	1.1337	46.0714	2	2	2	0	0	0	0	0	0	0	0	0	0	0	0	0	0	0	0	0	0	0	0	0	0	0	0	0	0	0	0
1332	118947	0.858	45.55	53.07	0.775	8.8	11.35	0.864	10.79	12.48	0.887	12.34	13.91	0.889	13.63	15.33	1.1566	43.5578	2	2	2	0	0	0	0	0	0	0	0	0	0	0	0	0	0	0	0	0	0	0	0	0	0	0	0	0	0	0	0
1333	118957	1.021	47.53	46.56	0.986	9.66	9.8	1.056	11.67	11.05	1.04	12.01	11.55	1.002	14.18	14.15	1.1394	45.4304	2	2	2	0	0	0	0	0	0	0	0	0	0	0	0	0	0	0	0	0	0	0	0	0	0	0	0	0	0	0	0
1334	118966	1.359	107.93	79.42	1.202	19.74	16.43	1.322	26.66	20.16	1.439	28.37	19.71	1.434	33.16	23.12	1.1452	37.3974	2	2	2	0	0	0	0	0	0	0	0	0	0	0	0	0	0	0	0	0	0	0	0	0	0	0	0	0	0	0	0
1335	118971	0.747	48.47	64.87	0.666	9.11	13.67	0.693	10.04	14.49	0.762	12.83	16.84	0.831	16.5	19.87	1.1443	38.6368	2	2	2	0	0	0	0	0	0	0	0	0	0	0	0	0	0	0	0	0	0	0	0	0	0	0	0	0	0	0	0
1336	118980	0.921	59.56	64.64	0.807	11.35	14.05	0.894	13.04	14.58	0.946	15.59	16.48	1.003	19.59	19.53	1.1356	45.3415	2	2	2	0	0	0	0	0	0	0	0	0	0	0	0	0	0	0	0	0	0	0	0	0	0	0	0	0	0	0	0
1337	118985	0.988	66	66.82	0.891	13.46	15.1	0.949	16.02	16.89	1.044	17.77	17.03	1.053	18.74	17.81	1.1354	45.2683	2	2	2	0	0	0	0	0	0	0	0	0	0	0	0	0	0	0	0	0	0	0	0	0	0	0	0	0	0	0	0
1338	118986	0.869	55.2	63.49	0.788	10.34	13.12	0.892	13.7	15.36	0.842	13.96	16.58	0.933	17.2	18.43	1.1183	46.1787	2	2	2	0	0	0	0	0	0	0	0	0	0	0	0	0	0	0	0	0	0	0	0	0	0	0	0	0	0	0	0
1339	118989	0.924	53.52	57.93	0.832	10.94	13.15	0.871	11.98	13.75	0.946	13.91	14.7	1.023	16.69	16.32	1.1444	44.5809	2	2	2	0	0	0	0	0	0	0	0	0	0	0	0	0	0	0	0	0	0	0	0	0	0	0	0	0	0	0	0
1340	118992	0.934	64.9	69.5	0.852	11.67	13.69	0.92	14.91	16.22	0.944	19.06	20.19	0.993	19.26	19.4	1.1331	41.861	2	1	2	0	1	0	0	0	0	0	0	0	0	0	0	15	1	0	0	0	0	0	0	0	0	0	0	0	0	0	0
1341	119016	1.054	71.06	67.39	0.94	13.44	14.3	1.073	17.3	16.12	1.086	19.31	17.78	1.096	21.01	19.18	1.157	43.0474	2	2	2	0	0	0	0	0	0	0	0	0	0	0	0	0	0	0	0	0	0	0	0	0	0	0	0	0	0	0	0
1342	119017	1.063	77.26	72.67	0.987	14.66	14.85	1.109	18.9	17.05	1.093	20.59	18.84	1.053	23.09	21.94	1.1258	41.2974	2	2	2	0	0	0	0	0	0	0	0	0	0	0	0	0	0	0	0	0	0	0	0	0	0	0	0	0	0	0	0
1343	119019	0.853	50.15	58.76	0.846	12.02	14.21	0.852	13.93	16.34	0.871	13.84	15.9	0.842	10.36	12.31	1.1314	46.8848	2	2	2	0	0	0	0	0	0	0	0	0	0	0	0	0	0	0	0	0	0	0	0	0	0	0	0	0	0	0	0
1344	119022	1.038	78.13	75.25	1.01	16.27	16.1	1.09	20.44	18.75	1.034	20.17	19.51	1.018	21.26	20.88	1.1571	39.625	2	2	2	0	0	0	0	0	0	0	0	0	0	0	0	0	0	0	0	0	0	0	0	0	0	0	0	0	0	0	0
1345	119030	0.715	45.41	63.48	0.644	9.91	15.39	0.702	12.9	18.36	0.753	13.24	17.57	0.771	9.36	12.15	1.1389	44.937	2	1	1	0	1	1	0	0	0	0	0	0	0	0	0	11	1	0	0	0	0	0	0	0	0	0	0	0	0	0	0
1346	119040	0.853	45.9	53.81	0.696	8.35	12	0.799	10.62	13.29	0.917	13.34	14.55	0.973	13.59	13.97	1.1384	46.3416	2	2	2	0	0	0	0	0	0	0	0	0	0	0	0	0	0	0	0	0	0	0	0	0	0	0	0	0	0	0	0
1347	119061	0.98	57.12	58.3	0.962	12.73	13.23	1.04	13.53	13.01	1.002	14.93	14.9	0.928	15.92	17.16	1.1324	44.5403	2	2	2	0	0	0	0	0	0	0	0	0	0	0	0	0	0	0	0	0	0	0	0	0	0	0	0	0	0	0	0
1348	119065	0.85	42.86	50.44	0.814	8.94	10.99	0.861	10.69	12.42	0.873	11.3	12.95	0.847	11.92	14.07	1.1468	41.1986	2	2	2	0	0	0	0	0	0	0	0	0	0	0	0	0	0	0	0	0	0	0	0	0	0	0	0	0	0	0	0
1349	119073	1.063	72.39	68.07	1.017	15.28	15.03	1.06	17.7	16.7	1.052	19.08	18.13	1.116	20.33	18.21	1.145	40.4156	2	2	2	0	0	0	0	0	0	0	0	0	0	0	0	0	0	0	0	0	0	0	0	0	0	0	0	0	0	0	0
1350	119075	0.751	34.06	45.36	0.703	6.97	9.92	0.782	8.39	10.73	0.742	8.33	11.23	0.769	10.37	13.49	1.1582	45.7384	2	2	2	0	0	0	0	0	0	0	0	0	0	0	0	0	0	0	0	0	0	0	0	0	0	0	0	0	0	0	0
1351	119077	1.105	80.23	72.59	1.078	16.29	15.11	1.12	19.79	17.67	1.122	21.48	19.14	1.097	22.67	20.66	1.1339	41.6867	2	2	2	0	0	0	0	0	0	0	0	0	0	0	0	0	0	0	0	0	0	0	0	0	0	0	0	0	0	0	0
1352	119083	1.02	65.06	63.76	1.05	14.93	14.22	1.007	15.1	14.99	1.062	19.87	18.71	0.958	15.16	15.83	1.1472	38.4421	2	1	2	0	1	0	0	0	0	0	0	0	0	0	0	50	2	2	0	0	0	0	0	0	0	0	0	0	0	0	0
1353	119091	0.966	65.06	67.37	0.969	14.88	15.36	0.995	16.49	16.58	0.967	16.12	16.67	0.936	17.57	18.76	1.1544	42.589	2	2	2	0	0	0	0	0	0	0	0	0	0	0	0	0	0	0	0	0	0	0	0	0	0	0	0	0	0	0	0
1354	119094	1.139	65.1	57.17	1.114	14.49	13	1.141	15.77	13.83	1.172	16.61	14.17	1.128	18.24	16.16	1.1464	40.7617	2	2	2	0	0	0	0	0	0	0	0	0	0	0	0	0	0	0	0	0	0	0	0	0	0	0	0	0	0	0	0
1355	119095	1.071	78.87	73.65	0.975	16.21	16.63	1.068	19.2	17.98	1.14	21.15	18.55	1.088	22.31	20.5	1.127	41.5201	2	2	2	0	0	0	0	0	0	0	0	0	0	0	0	0	0	0	0	0	0	0	0	0	0	0	0	0	0	0	0
1356	119102	0.851	47.56	55.91	0.84	9.86	11.74	0.832	11.47	13.79	0.824	11.74	14.24	0.898	14.49	16.14	1.134	47.3285	2	2	2	0	0	0	0	0	0	0	0	0	0	0	0	0	0	0	0	0	0	0	0	0	0	0	0	0	0	0	0
1357	119123	0.826	63.14	76.41	0.75	12.78	17.05	0.811	14.49	17.88	0.849	16.77	19.74	0.879	19.1	21.73	1.154	42.47	2	2	2	0	0	0	0	0	0	0	0	0	0	0	0	0	0	0	0	0	0	0	0	0	0	0	0	0	0	0	0
1358	119124	1.121	72.28	64.47	1.087	14.52	13.36	1.173	17.31	14.76	1.129	18.65	16.52	1.099	21.8	19.83	1.1513	43.6003	2	2	2	0	0	0	0	0	0	0	0	0	0	0	0	0	0	0	0	0	0	0	0	0	0	0	0	0	0	0	0
1359	119139	0.576	30.57	53.1	0.589	7.78	13.2	0.538	6.58	12.23	0.553	7.65	13.84	0.619	8.56	13.84	1.1399	47.5394	2	2	2	0	0	0	0	0	0	0	0	0	0	0	0	0	0	0	0	0	0	0	0	0	0	0	0	0	0	0	0
1360	119142	0.918	56.8	61.91	0.841	12.22	14.54	0.904	12.59	13.93	0.942	16.32	17.33	0.973	15.67	16.11	1.1496	41.2057	2	1	2	0	1	0	0	0	0	0	0	0	0	0	0	65	2	1	0	0	0	0	0	0	0	0	0	0	0	0	0
1361	119155	0.924	46.43	50.26	0.862	9.23	10.7	0.925	10.83	11.71	0.98	12.6	12.86	0.919	13.77	14.99	1.1387	37.6344	2	2	2	0	0	0	0	0	0	0	0	0	0	0	0	0	0	0	0	0	0	0	0	0	0	0	0	0	0	0	0
1362	119157	1.255	72.09	57.46	1.13	14.96	13.24	1.268	17.09	13.48	1.365	20.81	15.24	1.24	19.22	15.5	1.1402	37.9798	2	2	2	0	0	0	0	0	0	0	0	0	0	0	0	0	0	0	0	0	0	0	0	0	0	0	0	0	0	0	0
1363	119164	1.068	68.83	64.47	1.027	15.16	14.77	1.095	17.49	15.97	1.062	17.99	16.95	1.083	18.19	16.79	1.1337	43.785	2	2	2	0	0	0	0	0	0	0	0	0	0	0	0	0	0	0	0	0	0	0	0	0	0	0	0	0	0	0	0
1364	119172	0.931	48.93	52.55	0.767	9.44	12.31	0.892	11.78	13.2	1.007	12.64	12.55	1.04	15.08	14.49	1.1522	43.4492	2	2	2	0	0	0	0	0	0	0	0	0	0	0	0	0	0	0	0	0	0	0	0	0	0	0	0	0	0	0	0
1365	119193	0.778	39.87	51.23	0.625	6.49	10.38	0.727	8.81	12.11	0.825	11.5	13.95	0.884	13.07	14.79	1.1365	43.3981	2	2	2	0	0	0	0	0	0	0	0	0	0	0	0	0	0	0	0	0	0	0	0	0	0	0	0	0	0	0	0
1366	119202	1.142	70.86	62.05	1.024	14.88	14.54	1.1	16.52	15.02	1.167	18.92	16.21	1.261	20.54	16.28	1.1275	47.5269	2	1	2	0	1	0	0	0	0	0	0	0	0	0	0	65	2	1	0	0	0	0	0	0	0	0	0	0	0	0	0
1367	119206	1.298	71.46	55.05	1.197	14.73	12.3	1.243	15.22	12.24	1.399	20.32	14.53	1.327	21.19	15.97	1.1279	42.0702	2	2	2	0	0	0	0	0	0	0	0	0	0	0	0	0	0	0	0	0	0	0	0	0	0	0	0	0	0	0	0
1368	119219	0.953	42.67	44.77	0.885	7.93	8.96	0.815	8.6	10.54	0.973	12.17	12.51	1.095	13.97	12.76	1.1577	43.1293	2	2	2	0	0	0	0	0	0	0	0	0	0	0	0	0	0	0	0	0	0	0	0	0	0	0	0	0	0	0	0
1369	119220	0.903	51.33	56.84	0.802	10.48	13.06	0.899	12.95	14.41	0.968	14.88	15.37	0.931	13.02	14	1.1284	47.6027	2	2	2	0	0	0	0	0	0	0	0	0	0	0	0	0	0	0	0	0	0	0	0	0	0	0	0	0	0	0	0
1370	119223	0.968	59.47	61.46	0.917	12.79	13.94	0.984	13.77	14	0.989	15.93	16.11	0.975	16.98	17.41	1.1313	44.015	2	2	2	0	0	0	0	0	0	0	0	0	0	0	0	0	0	0	0	0	0	0	0	0	0	0	0	0	0	0	0
1371	119230	0.866	56.37	65.07	0.838	11.3	13.48	0.816	12.3	15.07	0.87	14.91	17.14	0.922	17.86	19.38	1.149	39.8666	2	1	2	0	1	0	0	0	0	0	0	0	0	0	0	1	1	0	0	0	0	0	0	0	0	0	0	0	0	0	0
1372	119232	1.045	76.96	73.67	0.924	15.5	16.77	1.024	18.79	18.34	1.112	20.66	18.59	1.102	22.01	19.97	1.1379	46.8738	2	2	2	0	0	0	0	0	0	0	0	0	0	0	0	0	0	0	0	0	0	0	0	0	0	0	0	0	0	0	0
1373	119237	0.814	37.63	46.21	0.634	5.73	9.04	0.771	9.03	11.71	0.894	10.97	12.28	0.903	11.9	13.18	1.1566	44.322	2	2	2	0	0	0	0	0	0	0	0	0	0	0	0	0	0	0	0	0	0	0	0	0	0	0	0	0	0	0	0
1374	119239	0.967	65.37	67.59	0.884	12.87	14.56	0.909	11.04	12.14	0.991	16.31	16.45	1.03	25.16	24.43	1.1396	37.2633	2	2	2	0	0	0	0	0	0	0	0	0	0	0	0	0	0	0	0	0	0	0	0	0	0	0	0	0	0	0	0
1375	119265	0.793	43.92	55.4	0.799	9.97	12.48	0.791	10.05	12.7	0.752	10.31	13.7	0.823	13.6	16.52	1.1545	42.0935	2	2	2	0	0	0	0	0	0	0	0	0	0	0	0	0	0	0	0	0	0	0	0	0	0	0	0	0	0	0	0
1376	119267	1.044	60.3	57.73	0.919	10.88	11.83	0.973	14.38	14.79	1.09	16.51	15.16	1.161	18.53	15.96	1.1419	47.0904	2	2	2	0	0	0	0	0	0	0	0	0	0	0	0	0	0	0	0	0	0	0	0	0	0	0	0	0	0	0	0
1377	119272	1.1	99.98	90.85	1.066	22.38	21	1.127	23.48	20.84	1.064	23.6	22.19	1.138	30.51	26.82	1.1413	39.2867	2	2	2	0	0	0	0	0	0	0	0	0	0	0	0	0	0	0	0	0	0	0	0	0	0	0	0	0	0	0	0
1378	119274	0.982	74.08	75.44	0.855	14.73	17.23	0.986	17.97	18.22	1.043	20.1	19.27	1.027	21.28	20.72	1.1477	37.8348	2	2	2	0	0	0	0	0	0	0	0	0	0	0	0	0	0	0	0	0	0	0	0	0	0	0	0	0	0	0	0
1379	119291	1.077	63.1	58.6	0.997	13.66	13.71	1.071	13.19	12.31	1.185	16.44	13.88	1.06	19.81	18.7	1.1562	43.028	2	2	2	0	0	0	0	0	0	0	0	0	0	0	0	0	0	0	0	0	0	0	0	0	0	0	0	0	0	0	0
1380	119293	0.853	57.51	67.44	0.801	13.18	16.45	0.871	14.78	16.98	0.877	15.82	18.05	0.86	13.72	15.97	1.1375	43.3798	2	2	2	0	0	0	0	0	0	0	0	0	0	0	0	0	0	0	0	0	0	0	0	0	0	0	0	0	0	0	0
1381	119297	0.877	42.25	48.17	0.834	8.58	10.29	0.895	9.47	10.57	0.939	11.45	12.2	0.844	12.75	15.11	1.1353	44.7345	2	2	2	0	0	0	0	0	0	0	0	0	0	0	0	0	0	0	0	0	0	0	0	0	0	0	0	0	0	0	0
1382	119313	1.046	55.79	53.36	0.983	11.62	11.83	1.022	12.11	11.85	1.144	15.58	13.63	1.026	16.47	16.05	1.1289	40.3779	2	2	2	0	0	0	0	0	0	0	0	0	0	0	0	0	0	0	0	0	0	0	0	0	0	0	0	0	0	0	0
1383	119321	0.893	54.32	60.8	0.809	10.14	12.53	0.856	12.8	14.95	0.892	13.9	15.59	0.986	17.48	17.73	1.1413	47.316	2	2	2	0	0	0	0	0	0	0	0	0	0	0	0	0	0	0	0	0	0	0	0	0	0	0	0	0	0	0	0
1384	119324	0.79	48.62	61.54	0.73	10.23	14.01	0.755	11.43	15.13	0.806	12.65	15.68	0.857	14.32	16.71	1.1332	45.5438	2	2	2	0	0	0	0	0	0	0	0	0	0	0	0	0	0	0	0	0	0	0	0	0	0	0	0	0	0	0	0
1385	119330	0.67	34.53	51.49	0.657	8.24	12.55	0.695	8.83	12.7	0.659	9.11	13.83	0.673	8.35	12.42	1.1464	40.8857	2	1	2	0	1	0	0	0	0	0	0	0	0	0	0	60	2	1	0	0	0	0	0	0	0	0	0	0	0	0	0
1386	119337	1.119	70.76	63.22	1.074	16.72	15.56	1.118	17.62	15.75	1.142	18.07	15.82	1.141	18.35	16.09	1.136	46.0723	2	2	2	0	0	0	0	0	0	0	0	0	0	0	0	0	0	0	0	0	0	0	0	0	0	0	0	0	0	0	0
1387	119350	1.043	60.16	57.7	0.946	12.3	13	1.021	13.91	13.62	1.083	16.89	15.6	1.102	17.07	15.49	1.1603	47.1115	2	2	2	0	0	0	0	0	0	0	0	0	0	0	0	0	0	0	0	0	0	0	0	0	0	0	0	0	0	0	0
1388	119356	0.591	24.72	41.86	0	0	0	0.564	7.4	13.13	0.608	7.89	12.98	0.599	9.43	15.75	1.1533	43.1951	2	2	2	0	0	0	0	0	0	0	0	0	0	0	0	0	0	0	0	0	0	0	0	0	0	0	0	0	0	0	0
1389	119358	0.974	53.49	54.91	0.926	10.86	11.73	1.024	14.29	13.96	0.931	13.6	14.61	1.008	14.74	14.62	1.1266	45.813	2	2	2	0	0	0	0	0	0	0	0	0	0	0	0	0	0	0	0	0	0	0	0	0	0	0	0	0	0	0	0
1390	119360	0.907	54.3	59.84	0.863	11.87	13.76	0.899	13.13	14.61	0.963	15.64	16.24	0.897	13.67	15.23	1.1592	43.0913	2	2	2	0	0	0	0	0	0	0	0	0	0	0	0	0	0	0	0	0	0	0	0	0	0	0	0	0	0	0	0
1391	119361	0.941	67.99	72.26	0.883	14.15	16.03	0.977	16.32	16.71	0.91	17.02	18.7	0.985	20.5	20.82	1.13	46.4034	2	2	1	0	0	1	0	0	0	0	0	0	0	0	0	0	0	0	0	0	0	0	0	0	0	0	0	0	0	0	0
1392	119363	1.015	62.97	62.02	1.016	15.26	15.01	0.976	13.29	13.62	1.028	16.85	16.39	1.034	17.57	17	1.1317	45.2612	2	2	2	0	0	0	0	0	0	0	0	0	0	0	0	0	0	0	0	0	0	0	0	0	0	0	0	0	0	0	0
1393	119364	1.067	57.44	53.84	0.94	11.61	12.35	1.041	13.21	12.69	1.1	15.3	13.91	1.164	17.32	14.88	1.1384	46.8483	2	2	2	0	0	0	0	0	0	0	0	0	0	0	0	0	0	0	0	0	0	0	0	0	0	0	0	0	0	0	0
1394	119367	1.033	68.29	66.08	1.016	14.91	14.68	0.963	14.87	15.44	0.989	16.63	16.82	1.143	21.88	19.15	1.1478	42.7857	2	2	2	0	0	0	0	0	0	0	0	0	0	0	0	0	0	0	0	0	0	0	0	0	0	0	0	0	0	0	0
1395	119369	1.068	77.16	72.24	1.048	17.53	16.73	1.138	18.41	16.18	1.102	22.35	20.29	0.991	18.87	19.04	1.1346	43.2739	2	2	2	0	0	0	0	0	0	0	0	0	0	0	0	0	0	0	0	0	0	0	0	0	0	0	0	0	0	0	0
1396	119370	1.325	75.83	57.21	1.257	16.38	13.03	1.251	19.98	15.97	1.37	19.39	14.15	1.429	20.08	14.05	1.1433	39.899	2	2	2	0	0	0	0	0	0	0	0	0	0	0	0	0	0	0	0	0	0	0	0	0	0	0	0	0	0	0	0
1397	119391	1.019	65.62	64.4	0.983	15.5	15.77	1.004	14.94	14.87	1.024	17.44	17.03	1.061	17.74	16.73	1.1328	40.6389	2	2	2	0	0	0	0	0	0	0	0	0	0	0	0	0	0	0	0	0	0	0	0	0	0	0	0	0	0	0	0
1398	119393	0.966	57.08	59.11	0.886	11.96	13.5	0.959	13.35	13.93	0.968	14.16	14.63	1.033	17.61	17.06	1.1318	43.7724	2	2	2	0	0	0	0	0	0	0	0	0	0	0	0	0	0	0	0	0	0	0	0	0	0	0	0	0	0	0	0
1399	119399	0.996	68.64	68.91	0.948	14.25	15.03	0.959	15.06	15.7	1.005	17.56	17.47	1.051	21.76	20.7	1.1334	47.821	2	2	2	0	0	0	0	0	0	0	0	0	0	0	0	0	0	0	0	0	0	0	0	0	0	0	0	0	0	0	0
1400	119403	1.181	84.78	71.77	1.112	18.85	16.95	1.21	19.78	16.34	1.202	20.8	17.31	1.197	25.34	21.16	1.1293	46.59	2	2	2	0	0	0	0	0	0	0	0	0	0	0	0	0	0	0	0	0	0	0	0	0	0	0	0	0	0	0	0
1401	119405	0.874	49.64	56.8	0.847	10.96	12.93	0.936	13.56	14.48	0.926	12.76	13.77	0.792	12.37	15.61	1.1456	40.8897	2	2	2	0	0	0	0	0	0	0	0	0	0	0	0	0	0	0	0	0	0	0	0	0	0	0	0	0	0	0	0
1402	119407	1.126	67.51	59.99	1.098	13.35	12.16	1.141	15.18	13.3	1.098	17.31	15.77	1.155	21.66	18.75	1.1562	40.3773	2	2	2	0	0	0	0	0	0	0	0	0	0	0	0	0	0	0	0	0	0	0	0	0	0	0	0	0	0	0	0
1403	119427	0.836	42.84	51.27	0.841	11.5	13.67	0.839	11.08	13.21	0.829	9.72	11.73	0.833	10.54	12.66	1.1431	36.9688	2	2	2	0	0	0	0	0	0	0	0	0	0	0	0	0	0	0	0	0	0	0	0	0	0	0	0	0	0	0	0
1404	119434	0.969	63.2	65.21	0.922	13.76	14.92	0.948	14.22	14.99	0.959	15.99	16.67	1.033	19.23	18.62	1.1322	44.6389	2	2	2	0	0	0	0	0	0	0	0	0	0	0	0	0	0	0	0	0	0	0	0	0	0	0	0	0	0	0	0
1405	119435	0.685	39.42	57.53	0.709	9.69	13.67	0.695	9.38	13.49	0.689	10.14	14.73	0.652	10.2	15.65	1.1381	50.2838	2	1	2	0	1	0	0	0	0	0	0	0	0	0	0	11	1	0	0	0	0	0	0	0	0	0	0	0	0	0	0
1406	119444	1.074	71.18	66.3	1.004	15.71	15.65	1.075	17.17	15.97	1.099	18.64	16.95	1.11	19.67	17.73	1.124	48.0607	2	2	2	0	0	0	0	0	0	0	0	0	0	0	0	0	0	0	0	0	0	0	0	0	0	0	0	0	0	0	0
1407	119447	0.985	64.13	65.09	0.95	13.3	13.99	1.026	15.07	14.69	0.991	16.79	16.94	0.974	18.97	19.48	1.1339	45.3754	2	2	2	0	0	0	0	0	0	0	0	0	0	0	0	0	0	0	0	0	0	0	0	0	0	0	0	0	0	0	0
1408	119450	0.744	43.3	58.23	0.697	8.68	12.44	0.767	10.32	13.47	0.762	11.39	14.96	0.744	12.92	17.37	1.1463	40.8244	2	2	2	0	0	0	0	0	0	0	0	0	0	0	0	0	0	0	0	0	0	0	0	0	0	0	0	0	0	0	0
1409	119451	0.871	61.46	70.59	0.885	13.6	15.38	0.834	13.9	16.67	0.847	15.14	17.89	0.911	18.81	20.65	1.1352	43.3142	2	2	2	0	0	0	0	0	0	0	0	0	0	0	0	0	0	0	0	0	0	0	0	0	0	0	0	0	0	0	0
1410	119455	1.043	52	49.88	1.087	16.54	15.21	1.184	18.63	15.74	1.085	17.33	15.98	0.97	18.13	18.68	1.1379	43.4558	2	2	2	0	0	0	0	0	0	0	0	0	0	0	0	0	0	0	0	0	0	0	0	0	0	0	0	0	0	0	0
1411	119461	1.224	72.3	59.07	1.132	14.76	13.04	1.252	17.5	13.98	1.277	18.89	14.79	1.225	21.14	17.26	1.1344	49.0547	2	2	2	0	0	0	0	0	0	0	0	0	0	0	0	0	0	0	0	0	0	0	0	0	0	0	0	0	0	0	0
1412	119465	0.875	48.12	55.02	0.815	9.51	11.67	0.854	11.99	14.03	0.908	12.82	14.12	0.908	13.8	15.19	1.1397	48.4294	2	2	2	0	0	0	0	0	0	0	0	0	0	0	0	0	0	0	0	0	0	0	0	0	0	0	0	0	0	0	0
1413	119478	1.023	71.76	70.15	0.948	15.27	16.11	1.004	15.87	15.81	1.101	20.4	18.53	1.026	20.22	19.7	1.1462	37.8844	2	2	2	0	0	0	0	0	0	0	0	0	0	0	0	0	0	0	0	0	0	0	0	0	0	0	0	0	0	0	0
1414	119487	0.881	43.34	49.18	0.812	8.97	11.05	0.893	10.9	12.21	0.929	11.8	12.71	0.883	11.66	13.21	1.1301	47.1071	2	2	2	0	0	0	0	0	0	0	0	0	0	0	0	0	0	0	0	0	0	0	0	0	0	0	0	0	0	0	0
1415	119493	1.059	62.95	59.45	0.976	13.7	14.04	1.062	15.26	14.37	1.076	15.46	14.37	1.111	18.52	16.66	1.1455	40.0051	2	2	2	0	0	0	0	0	0	0	0	0	0	0	0	0	0	0	0	0	0	0	0	0	0	0	0	0	0	0	0
1416	119503	1.232	85.38	69.29	1.15	17.08	14.85	1.215	20.69	17.03	1.265	22.48	17.78	1.28	25.13	19.64	1.1249	45.3396	2	2	2	0	0	0	0	0	0	0	0	0	0	0	0	0	0	0	0	0	0	0	0	0	0	0	0	0	0	0	0
1417	119507	1.027	70.83	68.98	0.982	15.31	15.6	1.022	16.26	15.91	1.094	19.52	17.85	1.006	19.73	19.62	1.1308	48.6228	2	2	2	0	0	0	0	0	0	0	0	0	0	0	0	0	0	0	0	0	0	0	0	0	0	0	0	0	0	0	0
1418	119510	1.218	93.9	77.07	1.119	21.11	18.87	1.192	22.78	19.12	1.246	24.23	19.45	1.313	25.79	19.64	1.1445	37.7154	2	2	2	0	0	0	0	0	0	0	0	0	0	0	0	0	0	0	0	0	0	0	0	0	0	0	0	0	0	0	0
1419	119512	1.385	99.01	71.5	1.269	21.41	16.87	1.405	24	17.08	1.448	28.08	19.4	1.407	25.53	18.15	1.1521	42.4504	2	2	2	0	0	0	0	0	0	0	0	0	0	0	0	0	0	0	0	0	0	0	0	0	0	0	0	0	0	0	0
1420	119524	0.712	40.64	57.1	0.699	9.58	13.71	0.676	8.89	13.15	0.738	9.93	13.46	0.729	12.24	16.78	1.1466	41.871	2	2	2	0	0	0	0	0	0	0	0	0	0	0	0	0	0	0	0	0	0	0	0	0	0	0	0	0	0	0	0
1421	119556	0.961	64.54	67.2	0.927	13.05	14.08	1.025	15.91	15.52	0.998	17.95	17.98	0.899	17.64	19.62	1.1515	42.5306	2	2	2	0	0	0	0	0	0	0	0	0	0	0	0	0	0	0	0	0	0	0	0	0	0	0	0	0	0	0	0
1422	119559	1.099	76.15	69.32	0.961	13.98	14.54	1.076	17.43	16.2	1.132	20.48	18.1	1.185	24.26	20.48	1.1287	44.8429	2	2	2	0	0	0	0	0	0	0	0	0	0	0	0	0	0	0	0	0	0	0	0	0	0	0	0	0	0	0	0
1423	119561	1.121	72.71	64.83	1.019	14.39	14.13	1.149	16.66	14.5	1.102	18.51	16.79	1.193	23.15	19.41	1.1352	41.6084	2	2	2	0	0	0	0	0	0	0	0	0	0	0	0	0	0	0	0	0	0	0	0	0	0	0	0	0	0	0	0
1424	119563	1.184	87.74	74.08	1.089	18.22	16.74	1.135	20.75	18.29	1.207	23.03	19.09	1.289	25.74	19.96	1.1265	46.7333	2	2	2	0	0	0	0	0	0	0	0	0	0	0	0	0	0	0	0	0	0	0	0	0	0	0	0	0	0	0	0
1425	119572	1.046	60.23	57.58	0.939	12.6	13.42	0.973	14.16	14.55	1.132	15.07	13.31	1.13	18.41	16.3	1.1366	45.0962	2	2	2	0	0	0	0	0	0	0	0	0	0	0	0	0	0	0	0	0	0	0	0	0	0	0	0	0	0	0	0
1426	119585	1.407	83.45	59.31	1.448	21.38	14.76	1.388	18.77	13.53	1.405	21.57	15.36	1.387	21.73	15.67	1.1364	36.4536	2	2	2	0	0	0	0	0	0	0	0	0	0	0	0	0	0	0	0	0	0	0	0	0	0	0	0	0	0	0	0
1427	119587	1.162	79.65	68.54	1.037	16.11	15.53	1.134	19.08	16.83	1.222	21.97	17.98	1.236	22.5	18.2	1.1452	42.4422	2	2	2	0	0	0	0	0	0	0	0	0	0	0	0	0	0	0	0	0	0	0	0	0	0	0	0	0	0	0	0
1428	119591	0.806	39.89	49.49	0.767	8.45	11.01	0.82	9.94	12.12	0.881	11.55	13.11	0.751	9.95	13.25	1.1446	39.7047	2	2	2	0	0	0	0	0	0	0	0	0	0	0	0	0	0	0	0	0	0	0	0	0	0	0	0	0	0	0	0
1429	119606	1.093	71.26	65.21	1.001	15.34	15.33	1.104	16.59	15.02	1.189	18.29	15.38	1.081	21.05	19.47	1.1438	39.0868	2	2	2	0	0	0	0	0	0	0	0	0	0	0	0	0	0	0	0	0	0	0	0	0	0	0	0	0	0	0	0
1430	119617	0.975	55.26	56.7	0.946	10.69	11.3	0.951	13.22	13.89	1.006	15.02	14.93	0.986	16.34	16.58	1.1542	43.1488	2	2	2	0	0	0	0	0	0	0	0	0	0	0	0	0	0	0	0	0	0	0	0	0	0	0	0	0	0	0	0
1431	119618	1.049	72.45	69.08	0.946	14.56	15.4	1.055	18.36	17.4	1.111	18.31	16.49	1.072	21.23	19.8	1.1311	44.2276	2	2	2	0	0	0	0	0	0	0	0	0	0	0	0	0	0	0	0	0	0	0	0	0	0	0	0	0	0	0	0
1432	119630	0.939	46.83	49.87	0.854	9.13	10.7	0.922	10.82	11.74	1.01	13.65	13.52	0.95	13.22	13.92	1.1521	42.8423	2	2	2	0	0	0	0	0	0	0	0	0	0	0	0	0	0	0	0	0	0	0	0	0	0	0	0	0	0	0	0
1433	119631	0.872	51.96	59.62	0.907	11.84	13.06	0.902	12.53	13.88	0.854	13.11	15.35	0.836	14.49	17.33	1.1298	42.7513	2	2	2	0	0	0	0	0	0	0	0	0	0	0	0	0	0	0	0	0	0	0	0	0	0	0	0	0	0	0	0
1434	119632	1.02	60.07	58.89	0.9	12.28	13.64	1.048	15.61	14.89	1.092	15.77	14.44	1.031	16.42	15.92	1.1349	46.6758	2	2	2	0	0	0	0	0	0	0	0	0	0	0	0	0	0	0	0	0	0	0	0	0	0	0	0	0	0	0	0
1435	119634	1.146	76.05	66.35	1	14.64	14.64	1.084	17.73	16.36	1.199	19.96	16.64	1.267	23.72	18.72	1.15	40.2261	2	2	2	0	0	0	0	0	0	0	0	0	0	0	0	0	0	0	0	0	0	0	0	0	0	0	0	0	0	0	0
1436	119636	0.89	46.67	52.43	0.815	9.65	11.85	0.934	12.29	13.15	0.907	11.85	13.07	0.896	12.88	14.37	1.1382	45.0932	2	2	2	0	0	0	0	0	0	0	0	0	0	0	0	0	0	0	0	0	0	0	0	0	0	0	0	0	0	0	0
1437	119642	1.058	61.03	57.68	1.083	14.21	13.12	1.053	15.71	14.92	1.058	15.62	14.76	1.041	15.48	14.87	1.1322	41.7224	2	2	2	0	0	0	0	0	0	0	0	0	0	0	0	0	0	0	0	0	0	0	0	0	0	0	0	0	0	0	0
1438	119644	1.22	96.67	79.2	1.149	22.87	19.89	1.212	22.08	18.22	1.221	25.1	20.56	1.297	26.63	20.53	1.1521	38.4157	2	2	2	0	0	0	0	0	0	0	0	0	0	0	0	0	0	0	0	0	0	0	0	0	0	0	0	0	0	0	0
1439	119648	0.764	38.57	50.47	0.724	8.38	11.57	0.687	8.02	11.68	0.789	10.42	13.2	0.838	11.75	14.02	1.1541	43.6087	2	1	2	0	1	0	0	0	0	0	0	0	0	0	0	50	2	3	0	0	0	0	0	0	0	0	0	0	0	0	0
1440	119651	0.789	48.47	61.43	0.765	9.69	12.67	0.752	10.38	13.81	0.834	12.76	15.31	0.796	15.64	19.64	1.1368	47.3447	2	2	2	0	0	0	0	0	0	0	0	0	0	0	0	0	0	0	0	0	0	0	0	0	0	0	0	0	0	0	0
1441	119658	1.272	87.38	68.71	1.239	19.82	16	1.361	24.1	17.71	1.299	22.78	17.55	1.185	20.68	17.45	1.1369	42.9481	2	2	2	0	0	0	0	0	0	0	0	0	0	0	0	0	0	0	0	0	0	0	0	0	0	0	0	0	0	0	0
1442	119660	1.07	75.17	70.27	1.008	16.03	15.9	1.046	17.23	16.47	1.082	20.12	18.59	1.129	21.8	19.31	1.1418	41.6571	2	2	2	0	0	0	0	0	0	0	0	0	0	0	0	0	0	0	0	0	0	0	0	0	0	0	0	0	0	0	0
1443	119664	1.144	78.63	68.72	1.023	16.32	15.95	1.115	18.29	16.41	1.194	20.85	17.46	1.226	23.17	18.9	1.1316	39.8835	2	2	9	0	0	0	0	0	0	0	0	0	0	0	0	0	0	0	0	0	0	0	0	0	0	0	0	0	0	0	0
1444	119669	0.911	51.98	57.04	0.812	9.36	11.52	0.947	13.25	14	1.002	13.57	13.55	0.879	15.8	17.97	1.158	44.3125	2	2	2	0	0	0	0	0	0	0	0	0	0	0	0	0	0	0	0	0	0	0	0	0	0	0	0	0	0	0	0
1445	119670	0.98	51.6	52.66	0.834	10.1	12.12	0.94	12.42	13.21	1.052	14.29	13.59	1.076	14.79	13.74	1.129	42.2971	2	2	2	0	0	0	0	0	0	0	0	0	0	0	0	0	0	0	0	0	0	0	0	0	0	0	0	0	0	0	0
1446	119675	1.343	103.72	77.25	1.269	23.36	18.41	1.336	24.73	18.51	1.393	26.53	19.05	1.367	29.1	21.29	1.1466	38.7808	2	1	2	0	1	0	0	0	0	0	0	0	0	0	0	21	1	0	0	0	0	0	0	0	0	0	0	0	0	0	0
1447	119681	1.054	63.11	59.88	0.948	13.52	14.26	1.055	14.14	13.4	1.119	16.56	14.8	1.085	18.9	17.42	1.1527	41.51	2	2	2	0	0	0	0	0	0	0	0	0	0	0	0	0	0	0	0	0	0	0	0	0	0	0	0	0	0	0	0
1448	119683	1.041	59.37	57.03	0.99	11.99	12.11	1.026	13.33	12.99	1.06	15.75	14.86	1.072	18.3	17.07	1.1336	44.437	2	2	2	0	0	0	0	0	0	0	0	0	0	0	0	0	0	0	0	0	0	0	0	0	0	0	0	0	0	0	0
1449	119688	1.072	56.06	52.3	1.027	12.13	11.81	1.107	14.22	12.84	1.096	16.31	14.89	1.05	13.4	12.76	1.1502	42.729	2	2	2	0	0	0	0	0	0	0	0	0	0	0	0	0	0	0	0	0	0	0	0	0	0	0	0	0	0	0	0
1450	119695	0.826	43.55	52.69	0.739	8.78	11.88	0.845	11.27	13.35	0.918	12.46	13.57	0.794	11.04	13.9	1.1308	46.2297	2	2	2	0	0	0	0	0	0	0	0	0	0	0	0	0	0	0	0	0	0	0	0	0	0	0	0	0	0	0	0
1451	119711	0.878	50.21	57.21	0.741	8.29	11.2	0.845	11.58	13.7	0.934	13.38	14.33	0.944	16.97	17.98	1.1507	41.4955	2	2	2	0	0	0	0	0	0	0	0	0	0	0	0	0	0	0	0	0	0	0	0	0	0	0	0	0	0	0	0
1452	119746	0.904	59.31	65.59	0.875	13.63	15.58	0.99	15.34	15.49	0.928	16.18	17.43	0.829	14.16	17.09	1.1235	46.9565	2	2	2	0	0	0	0	0	0	0	0	0	0	0	0	0	0	0	0	0	0	0	0	0	0	0	0	0	0	0	0
1453	119749	0.903	51.2	56.68	0.844	9.8	11.61	0.905	12.1	13.36	0.945	13.33	14.11	0.907	15.97	17.6	1.135	46.5809	2	2	2	0	0	0	0	0	0	0	0	0	0	0	0	0	0	0	0	0	0	0	0	0	0	0	0	0	0	0	0
1454	119755	0.823	45.69	55.51	0.672	8.18	12.16	0.772	9.97	12.92	0.892	12.49	14	0.917	15.06	16.43	1.153	45.8301	2	2	2	0	0	0	0	0	0	0	0	0	0	0	0	0	0	0	0	0	0	0	0	0	0	0	0	0	0	0	0
1455	119775	0.92	42.36	46.04	0.823	9.37	11.38	0.951	10.38	10.91	1.019	11.79	11.57	0.89	10.83	12.17	1.1588	45.4109	2	2	2	0	0	0	0	0	0	0	0	0	0	0	0	0	0	0	0	0	0	0	0	0	0	0	0	0	0	0	0
1456	119799	0.863	45.59	52.85	0.755	8.89	11.77	0.888	10.61	11.95	0.902	12.57	13.94	0.891	13.53	15.19	1.1505	43.0711	2	2	2	0	0	0	0	0	0	0	0	0	0	0	0	0	0	0	0	0	0	0	0	0	0	0	0	0	0	0	0
1457	119813	0.845	55.38	65.57	0.826	10.98	13.29	0.843	12.22	14.5	0.833	14.75	17.7	0.869	17.43	20.07	1.1435	42.7079	2	2	2	0	0	0	0	0	0	0	0	0	0	0	0	0	0	0	0	0	0	0	0	0	0	0	0	0	0	0	0
1458	119814	0.771	35.54	46.08	0.668	6.1	9.13	0.779	7.85	10.08	0.842	12.06	14.32	0.76	9.53	12.55	1.1522	43	2	2	2	0	0	0	0	0	0	0	0	0	0	0	0	0	0	0	0	0	0	0	0	0	0	0	0	0	0	0	0
1459	119825	0.902	54.52	60.42	0.841	11.48	13.66	0.917	13.12	14.31	0.941	15.23	16.18	0.903	14.69	16.27	1.1354	47.5	2	1	2	0	1	0	0	0	0	0	0	0	0	0	0	34	1	0	0	0	0	0	0	0	0	0	0	0	0	0	0
1460	119834	1.132	78.6	69.44	1.141	17.82	15.62	1.135	18.75	16.52	1.173	21.45	18.3	1.083	20.57	19	1.1548	38.5588	2	2	2	0	0	0	0	0	0	0	0	0	0	0	0	0	0	0	0	0	0	0	0	0	0	0	0	0	0	0	0
1461	119839	0.929	54.57	58.72	0.795	9.87	12.42	0.867	11.84	13.66	0.988	15.57	15.75	1.024	17.3	16.89	1.135	46.7357	2	2	2	0	0	0	0	0	0	0	0	0	0	0	0	0	0	0	0	0	0	0	0	0	0	0	0	0	0	0	0
1462	119855	0.978	63.01	64.4	0.961	13.59	14.13	0.962	14.38	14.95	1.019	16.91	16.6	0.969	18.13	18.72	1.1469	40.865	2	2	2	0	0	0	0	0	0	0	0	0	0	0	0	0	0	0	0	0	0	0	0	0	0	0	0	0	0	0	0
1463	119870	1.206	72.25	59.92	1.112	13.75	12.36	1.201	18.18	15.14	1.225	18.78	15.34	1.261	21.53	17.08	1.1318	40.5488	2	2	2	0	0	0	0	0	0	0	0	0	0	0	0	0	0	0	0	0	0	0	0	0	0	0	0	0	0	0	0
1464	119876	1.181	73.26	62.02	1.128	14.78	13.1	1.2	17.75	14.8	1.193	19.01	15.94	1.194	21.72	18.18	1.1259	48.4561	2	2	2	0	0	0	0	0	0	0	0	0	0	0	0	0	0	0	0	0	0	0	0	0	0	0	0	0	0	0	0
1465	119883	1.12	54.89	49	1.101	11.33	10.29	1.131	13	11.5	1.087	14.72	13.54	1.158	15.84	13.68	1.1371	40.7818	2	2	2	0	0	0	0	0	0	0	0	0	0	0	0	0	0	0	0	0	0	0	0	0	0	0	0	0	0	0	0
1466	119886	1.225	81.04	66.16	1.149	17.13	14.9	1.249	17.96	14.37	1.245	26.6	21.37	1.247	19.36	15.52	1.1472	40.7561	2	2	2	0	0	0	0	0	0	0	0	0	0	0	0	0	0	0	0	0	0	0	0	0	0	0	0	0	0	0	0
1467	119889	1.135	66.34	58.48	1.108	15.08	13.61	1.087	16.12	14.83	1.134	18.25	16.09	1.211	16.9	13.95	1.1304	46.2379	2	2	2	0	0	0	0	0	0	0	0	0	0	0	0	0	0	0	0	0	0	0	0	0	0	0	0	0	0	0	0
1468	119890	1.175	73.28	62.34	1.121	15.7	14	1.141	17.23	15.1	1.207	19.78	16.39	1.221	20.58	16.85	1.1541	40.8922	2	2	1	0	0	1	0	0	0	0	0	0	0	0	0	0	0	0	0	0	0	0	0	0	0	0	0	0	0	0	0
1469	119923	0.968	48.86	50.48	0.851	9.55	11.23	0.999	11.5	11.51	1.059	12.74	12.04	0.959	15.06	15.7	1.1415	43.2634	2	2	2	0	0	0	0	0	0	0	0	0	0	0	0	0	0	0	0	0	0	0	0	0	0	0	0	0	0	0	0
1470	119928	0.86	42.23	49.11	0.777	8.2	10.55	0.878	9.82	11.18	0.891	11.51	12.92	0.879	12.7	14.46	1.1547	45.3061	2	2	2	0	0	0	0	0	0	0	0	0	0	0	0	0	0	0	0	0	0	0	0	0	0	0	0	0	0	0	0
1471	119932	1.046	67.72	64.72	0.992	17.76	17.91	0.995	16.82	16.9	1.114	14.39	12.91	1.103	18.74	17	1.1327	47.2863	2	2	2	0	0	0	0	0	0	0	0	0	0	0	0	0	0	0	0	0	0	0	0	0	0	0	0	0	0	0	0
1472	119934	1.149	82.47	71.74	1.084	17.57	16.21	1.073	17.32	16.15	1.172	21.91	18.7	1.241	25.67	20.69	1.1419	42.1968	2	2	2	0	0	0	0	0	0	0	0	0	0	0	0	0	0	0	0	0	0	0	0	0	0	0	0	0	0	0	0
1473	119940	0.941	58.19	61.83	0.919	14.01	15.25	0.964	13.89	14.4	0.932	14.34	15.39	0.95	15.95	16.79	1.1325	43.5794	2	2	2	0	0	0	0	0	0	0	0	0	0	0	0	0	0	0	0	0	0	0	0	0	0	0	0	0	0	0	0
1474	119944	0.975	58.57	60.09	1.055	15.29	14.49	0.963	13.62	14.14	0.927	13.76	14.86	0.958	15.9	16.6	1.1364	41.186	2	2	2	0	0	0	0	0	0	0	0	0	0	0	0	0	0	0	0	0	0	0	0	0	0	0	0	0	0	0	0
1475	119948	0.966	73.53	76.11	0.944	16.77	17.77	1.002	19.92	19.88	1.001	18.8	18.79	0.917	18.04	19.68	1.1335	44.2827	2	2	2	0	0	0	0	0	0	0	0	0	0	0	0	0	0	0	0	0	0	0	0	0	0	0	0	0	0	0	0
1476	119959	0.893	63.29	70.89	0.868	13.31	15.35	0.936	15.41	16.47	0.9	16.12	17.91	0.872	18.45	21.17	1.1478	40.4158	2	2	2	0	0	0	0	0	0	0	0	0	0	0	0	0	0	0	0	0	0	0	0	0	0	0	0	0	0	0	0
1477	119961	1.039	73.15	70.43	1.042	16.56	15.89	1.027	16.01	15.58	1.08	21.24	19.67	1.003	19.35	19.29	1.1321	46.2989	2	2	2	0	0	0	0	0	0	0	0	0	0	0	0	0	0	0	0	0	0	0	0	0	0	0	0	0	0	0	0
1478	119994	0.873	53.12	60.86	0.766	9.89	12.92	0.846	12.51	14.8	0.911	14.61	16.03	0.942	16.1	17.1	1.1571	44.6911	2	2	2	0	0	0	0	0	0	0	0	0	0	0	0	0	0	0	0	0	0	0	0	0	0	0	0	0	0	0	0
1479	120001	0.809	43.3	53.53	0.826	9.6	11.62	0.808	9.72	12.03	0.814	12.43	15.26	0.791	11.56	14.62	1.1469	39.9799	2	2	1	0	0	1	0	0	0	0	0	0	0	0	0	0	0	0	0	0	0	0	0	0	0	0	0	0	0	0	0
1480	120003	1.25	72.41	57.9	1.18	15.3	12.97	1.236	17.29	13.99	1.274	19.63	15.41	1.3	20.19	15.53	1.1344	37.5709	2	2	2	0	0	0	0	0	0	0	0	0	0	0	0	0	0	0	0	0	0	0	0	0	0	0	0	0	0	0	0
1481	120013	1.005	58.65	58.36	0.864	11.19	12.95	0.964	14.5	15.04	1.069	17.14	16.03	1.103	15.81	14.34	1.1117	43.397	2	2	2	0	0	0	0	0	0	0	0	0	0	0	0	0	0	0	0	0	0	0	0	0	0	0	0	0	0	0	0
1482	120019	0.869	54.1	62.25	0.868	11.35	13.08	0.863	12.09	14.01	0.886	15.35	17.32	0.858	15.3	17.83	1.1338	44.8212	2	2	2	0	0	0	0	0	0	0	0	0	0	0	0	0	0	0	0	0	0	0	0	0	0	0	0	0	0	0	0
1483	120022	0.913	60.73	66.52	0.864	13.66	15.8	0.929	13.78	14.84	0.903	16.07	17.79	0.952	17.22	18.09	1.1452	41.431	2	2	2	0	0	0	0	0	0	0	0	0	0	0	0	0	0	0	0	0	0	0	0	0	0	0	0	0	0	0	0
1484	120026	0.683	35.39	51.8	0.66	7.58	11.49	0.647	7.76	12	0.701	9.14	13.04	0.714	10.9	15.27	1.1521	45.7873	2	2	2	0	0	0	0	0	0	0	0	0	0	0	0	0	0	0	0	0	0	0	0	0	0	0	0	0	0	0	0
1485	120041	1.185	77.61	65.49	1.156	16.86	14.59	1.174	18.7	15.92	1.185	19.95	16.84	1.219	22.1	18.13	1.1382	44.9336	2	2	2	0	0	0	0	0	0	0	0	0	0	0	0	0	0	0	0	0	0	0	0	0	0	0	0	0	0	0	0
1486	120043	1.311	99.22	75.68	1.325	20.57	15.53	1.31	23.96	18.29	1.324	25.95	19.6	1.291	28.73	22.27	1.1454	40.8542	2	2	2	0	0	0	0	0	0	0	0	0	0	0	0	0	0	0	0	0	0	0	0	0	0	0	0	0	0	0	0
1487	120049	1.022	62.05	60.7	0.946	13.29	14.04	1.039	13.24	12.74	1.053	17.72	16.83	1.043	17.81	17.09	1.129	43.5446	2	2	2	0	0	0	0	0	0	0	0	0	0	0	0	0	0	0	0	0	0	0	0	0	0	0	0	0	0	0	0
1488	120054	0.745	39.54	53.1	0.781	10.78	13.81	0.738	12.54	17.01	0.727	6.58	9.05	0.728	9.64	13.23	1.1334	44.1488	2	2	2	0	0	0	0	0	0	0	0	0	0	0	0	0	0	0	0	0	0	0	0	0	0	0	0	0	0	0	0
1489	120056	1.019	28.32	27.79	0.923	12.5	13.54	1.091	14.91	13.66	1.144	15.62	13.65	1.11	15.82	14.25	1.129	46.7628	2	2	2	0	0	0	0	0	0	0	0	0	0	0	0	0	0	0	0	0	0	0	0	0	0	0	0	0	0	0	0
1490	120062	1.199	73.52	61.33	1.101	14.37	13.05	1.208	17.5	14.49	1.239	19.86	16.03	1.227	21.78	17.75	1.1348	43.6508	2	2	2	0	0	0	0	0	0	0	0	0	0	0	0	0	0	0	0	0	0	0	0	0	0	0	0	0	0	0	0
1491	120063	0.927	62.2	67.1	0.854	13.63	15.95	0.926	15.39	16.61	0.968	16.11	16.63	0.954	17.08	17.91	1.1367	44.48	2	2	2	0	0	0	0	0	0	0	0	0	0	0	0	0	0	0	0	0	0	0	0	0	0	0	0	0	0	0	0
1492	120067	1.004	73.93	73.66	0.99	17.3	17.47	1	17.18	17.19	1.016	17.58	17.3	1.008	21.87	21.7	1.1385	46.0554	2	2	2	0	0	0	0	0	0	0	0	0	0	0	0	0	0	0	0	0	0	0	0	0	0	0	0	0	0	0	0
1493	120096	1.194	75.33	63.11	1.107	15.23	13.76	1.197	19.16	16	1.258	21.08	16.75	1.197	19.85	16.59	1.1392	38.3176	2	2	2	0	0	0	0	0	0	0	0	0	0	0	0	0	0	0	0	0	0	0	0	0	0	0	0	0	0	0	0
1494	120097	1.055	70.35	66.68	0.881	13.07	14.84	1.003	15.4	15.35	1.166	19.87	17.04	1.132	22.01	19.45	1.1453	44.4531	2	2	2	0	0	0	0	0	0	0	0	0	0	0	0	0	0	0	0	0	0	0	0	0	0	0	0	0	0	0	0
1495	120107	0.793	42.21	53.2	0.733	8.74	11.93	0.792	10.18	12.85	0.833	11.14	13.38	0.807	12.15	15.04	1.1374	45.3603	2	2	2	0	0	0	0	0	0	0	0	0	0	0	0	0	0	0	0	0	0	0	0	0	0	0	0	0	0	0	0
1496	120109	0.789	36.17	45.85	0.675	7.93	11.76	0.747	7.51	10.06	0.85	10.11	11.9	0.875	10.62	12.14	1.1461	42.375	2	2	2	0	0	0	0	0	0	0	0	0	0	0	0	0	0	0	0	0	0	0	0	0	0	0	0	0	0	0	0
1497	120117	1.066	69.77	65.43	1.006	14.87	14.78	1.03	16.16	15.69	1.111	19.1	17.19	1.106	19.65	17.77	1.1375	41.8478	2	2	2	0	0	0	0	0	0	0	0	0	0	0	0	0	0	0	0	0	0	0	0	0	0	0	0	0	0	0	0
1498	120119	1.175	83.39	70.97	1.1	16.78	15.25	1.13	18.55	16.43	1.181	21.5	18.21	1.26	26.56	21.08	1.1451	39.3643	2	2	2	0	0	0	0	0	0	0	0	0	0	0	0	0	0	0	0	0	0	0	0	0	0	0	0	0	0	0	0
1499	120122	1.302	84.15	64.63	1.232	20.86	16.93	1.309	20.85	15.93	1.346	20.63	15.33	1.326	21.8	16.45	1.1415	38.2505	2	2	2	0	0	0	0	0	0	0	0	0	0	0	0	0	0	0	0	0	0	0	0	0	0	0	0	0	0	0	0
1500	120131	0.799	46.2	57.84	0.758	10.23	13.5	0.847	11.91	14.07	0.838	12.16	14.52	0.755	11.89	15.75	1.1481	41.6893	2	2	2	0	0	0	0	0	0	0	0	0	0	0	0	0	0	0	0	0	0	0	0	0	0	0	0	0	0	0	0
1501	120150	0.847	47.95	56.6	0.76	8.86	11.66	0.856	11.16	13.04	0.833	12.35	14.83	0.913	15.58	17.07	1.13	44.2915	2	2	2	0	0	0	0	0	0	0	0	0	0	0	0	0	0	0	0	0	0	0	0	0	0	0	0	0	0	0	0
1502	120156	0.988	77.82	78.73	0.915	16.77	18.33	1.014	19.96	19.67	1.02	20.35	19.94	0.998	20.74	20.78	1.1542	44.0854	2	2	2	0	0	0	0	0	0	0	0	0	0	0	0	0	0	0	0	0	0	0	0	0	0	0	0	0	0	0	0
1503	120177	0.923	51.72	56	0.785	9.51	12.12	0.884	11.72	13.26	1.033	15.24	14.75	0.961	15.25	15.87	1.1518	42.4252	2	2	2	0	0	0	0	0	0	0	0	0	0	0	0	0	0	0	0	0	0	0	0	0	0	0	0	0	0	0	0
1504	120180	1.04	60.38	58.03	0.903	11.84	13.11	0.964	12.57	13.04	1.091	17.83	16.34	1.167	18.14	15.55	1.1433	39.4079	2	1	2	0	1	0	0	0	0	0	0	0	0	0	0	45	1	0	0	0	0	0	0	0	0	0	0	0	0	0	0
1505	120196	0.917	45.53	49.65	0.907	10.68	11.78	0.943	10.59	11.22	0.916	12.46	13.61	0.905	11.81	13.04	1.1299	43.1394	2	2	2	0	0	0	0	0	0	0	0	0	0	0	0	0	0	0	0	0	0	0	0	0	0	0	0	0	0	0	0
1506	120197	0.924	50.32	54.48	0.899	10.39	11.56	0.925	11.9	12.86	0.972	14.39	14.81	0.894	13.64	15.26	1.1391	47.2146	2	2	2	0	0	0	0	0	0	0	0	0	0	0	0	0	0	0	0	0	0	0	0	0	0	0	0	0	0	0	0
1507	120204	1.385	81.16	58.59	1.322	17.92	13.56	1.326	19.3	14.56	1.463	21.17	14.47	1.423	22.76	16	1.1341	42.8018	2	2	2	0	0	0	0	0	0	0	0	0	0	0	0	0	0	0	0	0	0	0	0	0	0	0	0	0	0	0	0
1508	120212	0.734	63.79	86.92	0.726	13.35	18.4	0.785	16.73	21.3	0.738	18.7	25.33	0.686	15.01	21.89	1.1449	36.7127	2	1	2	0	2	0	0	0	0	0	0	0	0	0	0	21	1	0	48	1	0	0	0	0	0	0	0	0	0	0	0
1509	120214	0.816	50.19	61.5	0.733	8.97	12.23	0.801	11.41	14.24	0.85	13.39	15.76	0.852	16.42	19.27	1.1558	44.5964	2	2	2	0	0	0	0	0	0	0	0	0	0	0	0	0	0	0	0	0	0	0	0	0	0	0	0	0	0	0	0
1510	120218	1.058	63.11	59.67	0.973	13.74	14.13	0.98	15.24	15.54	1.138	17.19	15.1	1.138	16.94	14.89	1.1353	41.7748	1	2	2	1	0	0	48	1	0	0	0	0	0	0	0	0	0	0	0	0	0	0	0	0	0	0	0	0	0	0	0
1511	120247	0.969	58.18	60.02	0.921	11.98	13.01	0.934	13.46	14.4	0.967	14.8	15.3	1.037	17.95	17.31	1.1321	47.1693	2	2	2	0	0	0	0	0	0	0	0	0	0	0	0	0	0	0	0	0	0	0	0	0	0	0	0	0	0	0	0
1512	120259	1.134	63.42	55.92	1.006	13.15	13.08	1.061	14.36	13.53	1.213	17.74	14.62	1.237	18.16	14.68	1.1236	44.4107	2	2	2	0	0	0	0	0	0	0	0	0	0	0	0	0	0	0	0	0	0	0	0	0	0	0	0	0	0	0	0
1513	120273	0.975	60.82	62.37	0.89	11.52	12.94	0.936	14.63	15.63	1.037	16.7	16.12	1.016	17.97	17.68	1.1319	45.7849	1	1	2	1	2	0	53	2	1	0	0	0	0	0	0	45	1	0	53	2	1	0	0	0	0	0	0	0	0	0	0
1514	120279	0.873	43	49.28	0.862	9.47	10.98	0.855	9.61	11.25	0.888	11.67	13.14	0.881	12.26	13.91	1.1356	47.647	2	2	2	0	0	0	0	0	0	0	0	0	0	0	0	0	0	0	0	0	0	0	0	0	0	0	0	0	0	0	0
1515	120282	0.781	40.96	52.45	0.797	9.62	12.07	0.741	9.24	12.46	0.804	10.82	13.47	0.781	11.28	14.46	1.1541	42.6572	2	2	2	0	0	0	0	0	0	0	0	0	0	0	0	0	0	0	0	0	0	0	0	0	0	0	0	0	0	0	0
1516	120286	0.901	50.85	56.45	0.785	10.26	13.06	0.855	11.55	13.51	0.966	13.37	13.84	0.977	15.67	16.04	1.1538	43.6356	2	2	2	0	0	0	0	0	0	0	0	0	0	0	0	0	0	0	0	0	0	0	0	0	0	0	0	0	0	0	0
1517	120293	1.1	57.58	52.36	1.057	12.53	11.86	1.082	11.58	10.71	1.135	14.84	13.08	1.114	18.63	16.72	1.1413	40.9875	2	2	2	0	0	0	0	0	0	0	0	0	0	0	0	0	0	0	0	0	0	0	0	0	0	0	0	0	0	0	0
1518	120300	0.934	53.19	56.93	0.933	11.58	12.41	0.943	12.69	13.45	0.984	13.93	14.15	0.886	14.99	16.91	1.1546	38.8853	2	2	2	0	0	0	0	0	0	0	0	0	0	0	0	0	0	0	0	0	0	0	0	0	0	0	0	0	0	0	0
1519	120307	0.853	51.41	60.26	0.791	10.45	13.22	0.873	12.76	14.61	0.93	14.81	15.93	0.812	13.4	16.5	1.1484	41.4524	2	2	2	0	0	0	0	0	0	0	0	0	0	0	0	0	0	0	0	0	0	0	0	0	0	0	0	0	0	0	0
1520	120310	1.026	60.28	58.77	0.976	12.14	12.44	0.949	14.34	15.11	1.053	15.9	15.09	1.11	17.91	16.13	1.135	41.9624	2	2	2	0	0	0	0	0	0	0	0	0	0	0	0	0	0	0	0	0	0	0	0	0	0	0	0	0	0	0	0
1521	120311	0.864	53.63	62.1	0.714	9	12.61	0.867	13.52	15.59	0.94	15.24	16.21	0.897	15.87	17.69	1.1352	45.8624	2	2	2	0	0	0	0	0	0	0	0	0	0	0	0	0	0	0	0	0	0	0	0	0	0	0	0	0	0	0	0
1522	120315	1.124	72.81	64.75	1.002	14.35	14.31	1.078	17.51	16.24	1.184	19.49	16.47	1.211	21.46	17.72	1.144	37.7927	2	2	2	0	0	0	0	0	0	0	0	0	0	0	0	0	0	0	0	0	0	0	0	0	0	0	0	0	0	0	0
1523	120319	0.724	34.26	47.3	0.676	7.1	10.5	0.724	7.8	10.77	0.785	9.85	12.55	0.706	9.52	13.49	1.1541	44.2215	2	2	2	0	0	0	0	0	0	0	0	0	0	0	0	0	0	0	0	0	0	0	0	0	0	0	0	0	0	0	0
1524	120329	1.13	69.18	61.21	1.073	14.96	13.95	1.156	16.03	13.87	1.173	18.19	15.51	1.118	20	17.88	1.1323	43.7932	2	2	2	0	0	0	0	0	0	0	0	0	0	0	0	0	0	0	0	0	0	0	0	0	0	0	0	0	0	0	0
1525	120330	1.151	80.55	69.98	1.003	14.85	14.81	1.148	19.62	17.1	1.165	20.9	17.93	1.25	25.18	20.15	1.1285	44.0567	2	2	2	0	0	0	0	0	0	0	0	0	0	0	0	0	0	0	0	0	0	0	0	0	0	0	0	0	0	0	0
1526	120340	1.283	74.35	57.95	1.192	16.62	13.94	1.276	18.19	14.26	1.362	20.89	15.34	1.294	18.64	14.41	1.146	40.997	2	2	2	0	0	0	0	0	0	0	0	0	0	0	0	0	0	0	0	0	0	0	0	0	0	0	0	0	0	0	0
1527	120343	0.829	39.45	47.57	0.826	8.62	10.43	0.763	7.9	10.35	0.853	10.56	12.38	0.859	12.38	14.41	1.1369	48.094	2	2	2	0	0	0	0	0	0	0	0	0	0	0	0	0	0	0	0	0	0	0	0	0	0	0	0	0	0	0	0
1528	120345	1.032	75.72	73.4	1.007	17.57	17.44	1.113	18.68	16.78	1.058	20.31	19.19	0.959	19.16	19.98	1.1281	46.7268	2	2	2	0	0	0	0	0	0	0	0	0	0	0	0	0	0	0	0	0	0	0	0	0	0	0	0	0	0	0	0
1529	120346	0.975	60.3	61.88	0.886	10.67	12.05	1.012	15.3	15.12	0.993	15.32	15.43	0.986	19.01	19.28	1.1144	41.7367	2	2	2	0	0	0	0	0	0	0	0	0	0	0	0	0	0	0	0	0	0	0	0	0	0	0	0	0	0	0	0
1530	120352	1.061	64.78	61.03	0.946	13.98	14.79	1.094	15.28	13.97	1.094	16.59	15.17	1.107	18.92	17.09	1.1529	43.2334	2	1	2	0	1	0	0	0	0	0	0	0	0	0	0	50	2	1	0	0	0	0	0	0	0	0	0	0	0	0	0
1531	120353	0.454	29.94	66.01	0.439	7.2	16.42	0.461	7.23	15.69	0.464	7.74	16.69	0.452	7.78	17.22	1.1556	45.7313	2	2	2	0	0	0	0	0	0	0	0	0	0	0	0	0	0	0	0	0	0	0	0	0	0	0	0	0	0	0	0
1532	120356	1.087	74.15	68.21	0.994	14.68	14.78	1.106	16.98	15.36	1.109	19.74	17.8	1.122	22.75	20.28	1.1528	43.6192	2	2	2	0	0	0	0	0	0	0	0	0	0	0	0	0	0	0	0	0	0	0	0	0	0	0	0	0	0	0	0
1533	120361	0.814	47.18	57.95	0.738	9.15	12.4	0.86	13.39	15.57	0.853	13.01	15.26	0.791	11.64	14.72	1.1407	41.9911	2	2	2	0	0	0	0	0	0	0	0	0	0	0	0	0	0	0	0	0	0	0	0	0	0	0	0	0	0	0	0
1534	120376	1.242	88.38	71.15	1.162	20.05	17.26	1.257	20.78	16.53	1.267	22.36	17.65	1.278	25.19	19.72	1.1211	40.1254	2	2	2	0	0	0	0	0	0	0	0	0	0	0	0	0	0	0	0	0	0	0	0	0	0	0	0	0	0	0	0
1535	120379	0.842	43.42	51.58	0.747	7.71	10.32	0.847	10.12	11.95	0.908	12.37	13.62	0.843	13.23	15.69	1.1503	40.2275	2	2	2	0	0	0	0	0	0	0	0	0	0	0	0	0	0	0	0	0	0	0	0	0	0	0	0	0	0	0	0
1536	120382	0.961	42.59	44.32	0.856	8.54	9.97	0.931	10.68	11.47	0.987	11.9	12.06	1.06	11.47	10.82	1.1368	46.9554	2	2	2	0	0	0	0	0	0	0	0	0	0	0	0	0	0	0	0	0	0	0	0	0	0	0	0	0	0	0	0
1537	120387	0.929	62.62	67.4	0.895	13.23	14.79	0.949	16.13	17	0.981	17	17.33	0.889	16.25	18.29	1.1294	46.0174	2	2	2	0	0	0	0	0	0	0	0	0	0	0	0	0	0	0	0	0	0	0	0	0	0	0	0	0	0	0	0
1538	120388	0.991	62.96	63.51	0.923	13.35	14.46	0.989	14.92	15.08	1.011	16.47	16.29	1.031	18.22	17.68	1.1428	42.8063	2	2	2	0	0	0	0	0	0	0	0	0	0	0	0	0	0	0	0	0	0	0	0	0	0	0	0	0	0	0	0
1539	120391	1.067	57.87	54.26	1.039	13.15	12.66	1.046	13.81	13.21	1.154	15.78	13.68	1.029	15.13	14.71	1.132	42.8918	2	2	2	0	0	0	0	0	0	0	0	0	0	0	0	0	0	0	0	0	0	0	0	0	0	0	0	0	0	0	0
1540	120393	1.005	50.57	50.33	0.925	10.29	11.14	0.951	11.53	12.12	1.024	13.01	12.71	1.095	15.74	14.37	1.1443	41.3759	2	2	2	0	0	0	0	0	0	0	0	0	0	0	0	0	0	0	0	0	0	0	0	0	0	0	0	0	0	0	0
1541	120410	0.886	44.95	50.74	0.841	9.18	10.92	0.948	11.13	11.74	0.942	12.87	13.66	0.817	11.78	14.42	1.1393	50.4102	2	1	1	0	1	1	0	0	0	0	0	0	0	0	0	10	1	0	0	0	0	0	0	0	0	0	0	0	0	0	0
1542	120416	1.046	86.44	82.61	1.019	18.59	18.25	1.122	21.21	18.91	1.096	20.68	18.88	0.977	25.96	26.57	1.1465	41.4744	2	2	2	0	0	0	0	0	0	0	0	0	0	0	0	0	0	0	0	0	0	0	0	0	0	0	0	0	0	0	0
1543	120420	1.138	78.95	69.39	1.099	16.98	15.45	1.153	19.58	16.98	1.166	21.06	18.06	1.129	21.33	18.9	1.1238	47.7368	2	2	2	0	0	0	0	0	0	0	0	0	0	0	0	0	0	0	0	0	0	0	0	0	0	0	0	0	0	0	0
1544	120426	1.224	63.43	51.83	1.179	13.27	11.25	1.263	16.31	12.91	1.257	16.05	12.77	1.195	17.81	14.9	1.1372	36.3727	2	2	2	0	0	0	0	0	0	0	0	0	0	0	0	0	0	0	0	0	0	0	0	0	0	0	0	0	0	0	0
1545	120432	1.005	67.93	67.59	0.905	14.35	15.86	0.989	16.33	16.52	1.059	17.29	16.34	1.057	19.95	18.87	1.1472	41.7385	2	2	2	0	0	0	0	0	0	0	0	0	0	0	0	0	0	0	0	0	0	0	0	0	0	0	0	0	0	0	0
1546	120440	0.93	48.61	52.27	0.791	8.44	10.67	0.926	12.29	13.27	0.966	12.21	12.65	0.999	15.67	15.68	1.1338	45.2756	2	2	2	0	0	0	0	0	0	0	0	0	0	0	0	0	0	0	0	0	0	0	0	0	0	0	0	0	0	0	0
1547	120444	1.041	49.74	47.76	0.937	10.28	10.97	1.045	11.99	11.48	1.129	13.25	11.73	1.047	14.22	13.58	1.1451	40.596	2	2	2	0	0	0	0	0	0	0	0	0	0	0	0	0	0	0	0	0	0	0	0	0	0	0	0	0	0	0	0
1548	120450	1.02	56.44	55.33	0.953	11.59	12.16	1.065	14.33	13.46	1.038	15.58	15.01	1.017	14.95	14.7	1.1244	48.827	2	2	2	0	0	0	0	0	0	0	0	0	0	0	0	0	0	0	0	0	0	0	0	0	0	0	0	0	0	0	0
1549	120452	0.994	54.51	54.87	0.987	11.33	11.48	0.997	12.79	12.83	1.011	14.57	14.42	0.98	15.83	16.15	1.1307	42.3418	2	2	2	0	0	0	0	0	0	0	0	0	0	0	0	0	0	0	0	0	0	0	0	0	0	0	0	0	0	0	0
1550	120462	0.829	52.74	63.65	0.775	10.06	12.99	0.819	12.71	15.53	0.843	13.93	16.53	0.862	16.03	18.59	1.1496	43.6228	2	2	2	0	0	0	0	0	0	0	0	0	0	0	0	0	0	0	0	0	0	0	0	0	0	0	0	0	0	0	0
1551	120468	1.232	76.42	62.02	1.118	15.07	13.48	1.225	18.16	14.82	1.238	20.51	16.57	1.323	22.69	17.15	1.1545	40.9585	2	2	2	0	0	0	0	0	0	0	0	0	0	0	0	0	0	0	0	0	0	0	0	0	0	0	0	0	0	0	0
1552	120472	0.868	44.02	50.69	0.811	9.44	11.64	0.889	10.48	11.79	0.886	11.26	12.72	0.882	12.83	14.55	1.1437	39.1398	2	2	2	0	0	0	0	0	0	0	0	0	0	0	0	0	0	0	0	0	0	0	0	0	0	0	0	0	0	0	0
1553	120478	1.093	66.76	61.07	0.99	14.32	14.46	1.101	15.94	14.48	1.15	17.7	15.4	1.123	18.8	16.74	1.1368	43.2495	2	2	2	0	0	0	0	0	0	0	0	0	0	0	0	0	0	0	0	0	0	0	0	0	0	0	0	0	0	0	0
1554	120483	0.974	65.52	67.26	0.953	14.87	15.6	0.952	14.92	15.66	0.965	16.91	17.54	1.019	18.82	18.46	1.1333	47.4347	2	1	2	0	1	0	0	0	0	0	0	0	0	0	0	16	1	0	0	0	0	0	0	0	0	0	0	0	0	0	0
1555	120500	1.098	61.2	55.76	1.004	12.04	12	1.078	13.71	12.72	1.146	17.52	15.29	1.138	17.93	15.75	1.1358	45.7773	2	2	2	0	0	0	0	0	0	0	0	0	0	0	0	0	0	0	0	0	0	0	0	0	0	0	0	0	0	0	0
1556	120501	1.025	59.15	57.7	0.98	13.43	13.71	1.033	13.62	13.19	1.095	16.07	14.68	0.994	16.02	16.13	1.1315	45.2579	2	2	2	0	0	0	0	0	0	0	0	0	0	0	0	0	0	0	0	0	0	0	0	0	0	0	0	0	0	0	0
1557	120509	1.063	63.18	59.45	1.001	13.7	13.68	1.025	13.61	13.27	1.108	18.56	16.76	1.1	17.31	15.74	1.1353	44.4049	2	1	2	0	2	0	0	0	0	0	0	0	0	0	0	5	1	0	7	1	0	0	0	0	0	0	0	0	0	0	0
1558	120527	0.986	62.23	63.13	0.9	12.47	13.85	1.008	14.62	14.5	1.043	17.57	16.84	0.98	17.57	17.94	1.1289	43.6721	2	2	2	0	0	0	0	0	0	0	0	0	0	0	0	0	0	0	0	0	0	0	0	0	0	0	0	0	0	0	0
1559	120542	1.067	71.09	66.66	0.921	14.57	15.82	1.025	15.9	15.52	1.138	20.14	17.7	1.162	20.47	17.62	1.1513	42.1862	2	1	2	0	1	0	0	0	0	0	0	0	0	0	0	18	1	0	0	0	0	0	0	0	0	0	0	0	0	0	0
1560	120545	0.966	55.93	57.89	0.845	10.15	12.01	0.979	14.76	15.08	1.006	15.2	15.1	1.009	15.82	15.68	1.1347	47.2791	2	2	2	0	0	0	0	0	0	0	0	0	0	0	0	0	0	0	0	0	0	0	0	0	0	0	0	0	0	0	0
1561	120556	0.887	63.59	71.68	0.853	15.48	18.14	0.838	12.47	14.89	0.886	17.21	19.42	0.958	18.44	19.24	1.1358	45.4111	2	2	2	0	0	0	0	0	0	0	0	0	0	0	0	0	0	0	0	0	0	0	0	0	0	0	0	0	0	0	0
1562	120567	1.075	66.96	62.28	0.999	13.44	13.46	1.076	16.9	15.71	1.119	17.94	16.03	1.094	18.67	17.08	1.1303	46.1675	2	2	2	0	0	0	0	0	0	0	0	0	0	0	0	0	0	0	0	0	0	0	0	0	0	0	0	0	0	0	0
1563	120584	1.044	52.7	50.49	0.914	10.03	10.97	1.008	11.57	11.48	1.09	14	12.84	1.125	17.1	15.2	1.1507	43.4004	2	2	2	0	0	0	0	0	0	0	0	0	0	0	0	0	0	0	0	0	0	0	0	0	0	0	0	0	0	0	0
1564	120591	0.815	45.46	55.78	0.857	9.03	10.54	0.81	11.08	13.68	0.857	12.28	14.33	0.759	13.07	17.23	1.1378	48.9782	1	2	2	1	0	0	66	2	1	0	0	0	0	0	0	0	0	0	0	0	0	0	0	0	0	0	0	0	0	0	0
1565	120593	0.992	60.29	60.8	0.907	12.79	14.11	0.951	15.47	16.27	1.039	15.69	15.1	1.067	16.34	15.32	1.1354	45.0538	2	1	2	0	1	0	0	0	0	0	0	0	0	0	0	14	1	0	0	0	0	0	0	0	0	0	0	0	0	0	0
1566	120594	1.409	109.67	77.81	1.343	24.23	18.05	1.365	24.34	17.83	1.479	27.7	18.72	1.439	33.4	23.21	1.1374	40.2292	2	1	2	0	1	0	0	0	0	0	0	0	0	0	0	40	1	0	0	0	0	0	0	0	0	0	0	0	0	0	0
1567	120600	1.12	73	65.2	1.138	14.62	12.85	1.084	18.18	16.77	1.079	18.3	16.95	1.176	21.89	18.62	1.1369	41.6994	2	1	2	0	1	0	0	0	0	0	0	0	0	0	0	35	1	0	0	0	0	0	0	0	0	0	0	0	0	0	0
1568	120603	0.989	67	67.78	0.928	14.28	15.39	1.012	16.86	16.66	1.022	17.87	17.48	0.985	17.99	18.26	1.1596	43.2652	2	2	2	0	0	0	0	0	0	0	0	0	0	0	0	0	0	0	0	0	0	0	0	0	0	0	0	0	0	0	0
1569	120610	1.334	88.19	66.12	1.3	20.69	15.92	1.289	20.39	15.82	1.337	22.18	16.59	1.4	24.92	17.8	1.1275	45.0849	2	2	1	0	0	1	0	0	0	0	0	0	0	0	0	0	0	0	0	0	0	0	0	0	0	0	0	0	0	0	0
1570	120611	1.219	74.53	61.13	1.155	17.95	15.55	1.273	17.74	13.94	1.261	18.17	14.42	1.2	20.66	17.22	1.1276	44.1094	2	2	2	0	0	0	0	0	0	0	0	0	0	0	0	0	0	0	0	0	0	0	0	0	0	0	0	0	0	0	0
1571	120652	1.096	63.45	57.9	1.043	13.55	12.99	1.137	16.13	14.19	1.13	18.09	16.02	1.066	15.68	14.7	1.1368	45.6965	2	2	1	0	0	1	0	0	0	0	0	0	0	0	0	0	0	0	0	0	0	0	0	0	0	0	0	0	0	0	0
1572	120667	1.135	66.4	58.49	1.033	12.85	12.45	1.125	15.04	13.37	1.222	19.12	15.64	1.139	19.4	17.03	1.139	47.4815	2	2	2	0	0	0	0	0	0	0	0	0	0	0	0	0	0	0	0	0	0	0	0	0	0	0	0	0	0	0	0
1573	120671	1.156	64.48	55.76	1.095	13.84	12.63	1.117	14.67	13.13	1.208	16.97	14.05	1.192	19	15.94	1.1362	46.899	2	2	2	0	0	0	0	0	0	0	0	0	0	0	0	0	0	0	0	0	0	0	0	0	0	0	0	0	0	0	0
1574	120688	0.866	54.88	63.37	0.82	12.17	14.85	0.922	14.3	15.51	0.864	14.26	16.51	0.857	14.15	16.51	1.132	44.5562	2	2	2	0	0	0	0	0	0	0	0	0	0	0	0	0	0	0	0	0	0	0	0	0	0	0	0	0	0	0	0
1575	120691	0.656	37.14	56.64	0.654	8.34	12.76	0.673	9.13	13.56	0.711	9.96	14.02	0.595	9.7	16.3	1.1512	44.047	2	2	2	0	0	0	0	0	0	0	0	0	0	0	0	0	0	0	0	0	0	0	0	0	0	0	0	0	0	0	0
1576	120699	0.968	55.45	57.31	0.836	9.67	11.56	0.916	11.73	12.81	1.039	15.11	14.55	1.03	18.94	18.39	1.1333	46.1734	2	2	2	0	0	0	0	0	0	0	0	0	0	0	0	0	0	0	0	0	0	0	0	0	0	0	0	0	0	0	0
1577	120704	1.044	67.95	65.1	0.953	13.22	13.87	1.043	16.68	15.99	1.045	17.89	17.12	1.113	20.16	18.12	1.1452	43.2975	2	2	2	0	0	0	0	0	0	0	0	0	0	0	0	0	0	0	0	0	0	0	0	0	0	0	0	0	0	0	0
1578	120710	1.202	84.57	70.36	1.135	17.44	15.37	1.187	20.98	17.67	1.215	24.11	19.85	1.261	22.04	17.48	1.1323	35.111	2	1	2	0	1	0	0	0	0	0	0	0	0	0	0	27	1	0	0	0	0	0	0	0	0	0	0	0	0	0	0
1579	120734	1.003	55.11	54.96	0.903	10.34	11.45	1.031	13.86	13.44	1.061	15.58	14.68	0.996	15.32	15.39	1.157	43.9618	2	2	2	0	0	0	0	0	0	0	0	0	0	0	0	0	0	0	0	0	0	0	0	0	0	0	0	0	0	0	0
1580	120739	1.035	67.12	64.87	1.016	14.98	14.74	1.003	15.12	15.08	1.067	19.79	18.55	1.044	17.22	16.5	1.1357	44.6562	2	1	2	0	2	0	0	0	0	0	0	0	0	0	0	54	2	1	57	2	1	0	0	0	0	0	0	0	0	0	0
1581	120742	1.402	97.57	69.59	1.369	21.49	15.71	1.403	21.64	15.43	1.426	24.68	17.31	1.407	29.75	21.15	1.1429	37.5018	2	2	2	0	0	0	0	0	0	0	0	0	0	0	0	0	0	0	0	0	0	0	0	0	0	0	0	0	0	0	0
1582	120743	0.771	39.64	51.41	0.717	8.06	11.24	0.764	9.24	12.09	0.815	10.71	13.14	0.779	11.64	14.94	1.1343	46.8413	2	2	2	0	0	0	0	0	0	0	0	0	0	0	0	0	0	0	0	0	0	0	0	0	0	0	0	0	0	0	0
1583	120762	1.128	68.97	61.16	1.156	15.32	13.25	1.159	16.65	14.36	1.17	18.09	15.46	1.046	18.91	18.08	1.1556	40.1942	2	1	2	0	1	0	0	0	0	0	0	0	0	0	0	52	2	3	0	0	0	0	0	0	0	0	0	0	0	0	0
1584	120770	1.11	56.23	50.63	0.97	13.96	14.4	1.136	17.4	15.32	1.116	17.72	15.89	1.086	21.1	19.42	1.146	42.1541	2	2	2	0	0	0	0	0	0	0	0	0	0	0	0	0	0	0	0	0	0	0	0	0	0	0	0	0	0	0	0
1585	120788	0.874	52.48	60.02	0.8	11.18	13.97	0.824	11.82	14.35	0.91	13.65	15.01	0.948	15.82	16.69	1.1486	43.3636	2	2	2	0	0	0	0	0	0	0	0	0	0	0	0	0	0	0	0	0	0	0	0	0	0	0	0	0	0	0	0
1586	120791	0.91	56.93	62.55	0.836	11.19	13.37	0.94	13.76	14.64	0.988	15.37	15.55	0.875	16.62	18.98	1.1486	43.2729	2	2	2	0	0	0	0	0	0	0	0	0	0	0	0	0	0	0	0	0	0	0	0	0	0	0	0	0	0	0	0
1587	120793	1.005	42.21	41.99	1.04	13.34	12.82	1.009	13.69	13.57	1.18	17.39	14.74	0.974	15.19	15.6	1.1296	42.6487	2	2	2	0	0	0	0	0	0	0	0	0	0	0	0	0	0	0	0	0	0	0	0	0	0	0	0	0	0	0	0
1588	120794	1.103	73.29	66.42	1.096	17.31	15.79	1.118	18.13	16.22	1.092	18.75	17.18	1.108	19.09	17.23	1.1444	49.0037	2	2	2	0	0	0	0	0	0	0	0	0	0	0	0	0	0	0	0	0	0	0	0	0	0	0	0	0	0	0	0
1589	120799	1.306	88.91	68.09	1.17	16.94	14.48	1.3	22.47	17.29	1.342	22.21	16.55	1.381	27.29	19.76	1.1353	41.3651	2	2	2	0	0	0	0	0	0	0	0	0	0	0	0	0	0	0	0	0	0	0	0	0	0	0	0	0	0	0	0
1590	120817	1.116	82.81	74.2	1.02	17.82	17.47	1.122	19.4	17.3	1.141	21.68	19	1.17	23.9	20.43	1.1296	45.6896	2	1	2	0	1	0	0	0	0	0	0	0	0	0	0	48	1	0	0	0	0	0	0	0	0	0	0	0	0	0	0
1591	120825	1.157	63.12	54.54	1.123	15.1	13.45	1.2	15.59	12.99	1.173	16.02	13.65	1.136	16.42	14.45	1.1321	41.4914	2	2	2	0	0	0	0	0	0	0	0	0	0	0	0	0	0	0	0	0	0	0	0	0	0	0	0	0	0	0	0
1592	120826	0.993	55.02	55.43	0.919	11.15	12.14	1.01	13.61	13.47	1.039	14.67	14.12	0.993	15.59	15.69	1.1381	45.9963	2	2	2	0	0	0	0	0	0	0	0	0	0	0	0	0	0	0	0	0	0	0	0	0	0	0	0	0	0	0	0
1593	120831	1.154	78.02	67.6	1.147	16.63	14.49	1.066	17.65	16.56	1.17	20.43	17.46	1.222	23.31	19.08	1.1393	44.5625	2	2	2	0	0	0	0	0	0	0	0	0	0	0	0	0	0	0	0	0	0	0	0	0	0	0	0	0	0	0	0
1594	120832	0.868	50.17	57.81	0.836	10.59	12.67	0.886	11.24	12.68	0.857	12.94	15.1	0.887	15.4	17.35	1.1337	39.9934	2	2	2	0	0	0	0	0	0	0	0	0	0	0	0	0	0	0	0	0	0	0	0	0	0	0	0	0	0	0	0
1595	120843	1.148	83.23	72.51	1.018	17.09	16.79	1.151	20.83	18.09	1.245	22.86	18.37	1.166	22.45	19.26	1.1558	43.4204	2	2	2	0	0	0	0	0	0	0	0	0	0	0	0	0	0	0	0	0	0	0	0	0	0	0	0	0	0	0	0
1596	120862	0.976	70.56	72.33	0.873	13.33	15.26	0.946	15.39	16.27	1.051	20.53	19.53	1.002	21.32	21.28	1.1449	41.1571	2	2	2	0	0	0	0	0	0	0	0	0	0	0	0	0	0	0	0	0	0	0	0	0	0	0	0	0	0	0	0
1597	120879	0.824	48.36	58.71	0.79	9.59	12.15	0.823	12	14.59	0.849	12.96	15.28	0.827	13.81	16.7	1.1399	48.5444	2	2	2	0	0	0	0	0	0	0	0	0	0	0	0	0	0	0	0	0	0	0	0	0	0	0	0	0	0	0	0
1598	120884	1.26	68.52	54.39	1.234	18.06	14.64	1.235	12.84	10.39	1.28	19.83	15.49	1.283	17.79	13.87	1.1401	50.8342	2	2	2	0	0	0	0	0	0	0	0	0	0	0	0	0	0	0	0	0	0	0	0	0	0	0	0	0	0	0	0
1599	120885	1.021	69.41	68.01	0.889	12.71	14.31	1.013	17.13	16.92	1.048	18.06	17.24	1.1	21.5	19.54	1.1427	40.0616	2	2	2	0	0	0	0	0	0	0	0	0	0	0	0	0	0	0	0	0	0	0	0	0	0	0	0	0	0	0	0
1600	120887	0.614	27.11	44.12	0.602	5.88	9.76	0.594	6.36	10.69	0.64	7.66	11.96	0.617	7.22	11.71	1.1323	49.5335	2	2	2	0	0	0	0	0	0	0	0	0	0	0	0	0	0	0	0	0	0	0	0	0	0	0	0	0	0	0	0
1601	120899	0.944	58.89	62.4	0.91	13	14.29	0.923	12.74	13.8	0.917	13.86	15.11	1.005	19.29	19.19	1.1378	48.2102	2	2	2	0	0	0	0	0	0	0	0	0	0	0	0	0	0	0	0	0	0	0	0	0	0	0	0	0	0	0	0
1602	120904	1.308	94.7	72.41	1.298	21.98	16.93	1.311	22.34	17.04	1.267	21.65	17.1	1.346	28.73	21.34	1.1305	37.9983	2	2	2	0	0	0	0	0	0	0	0	0	0	0	0	0	0	0	0	0	0	0	0	0	0	0	0	0	0	0	0
1603	120930	1.17	64.34	54.99	1.075	11.66	10.85	1.202	17.6	14.65	1.173	17.33	14.77	1.205	17.75	14.73	1.1355	43.2485	2	2	2	0	0	0	0	0	0	0	0	0	0	0	0	0	0	0	0	0	0	0	0	0	0	0	0	0	0	0	0
1604	120934	0.915	56.26	61.47	0.885	12.31	13.91	0.93	13.94	14.98	0.914	14.24	15.59	0.928	15.77	16.99	1.1589	43.1452	2	2	2	0	0	0	0	0	0	0	0	0	0	0	0	0	0	0	0	0	0	0	0	0	0	0	0	0	0	0	0
1605	120939	1.027	69.4	67.57	1.045	16.93	16.2	0.98	17.05	17.4	1.02	17.42	17.09	1.067	18.01	16.88	1.1385	41.2792	2	2	2	0	0	0	0	0	0	0	0	0	0	0	0	0	0	0	0	0	0	0	0	0	0	0	0	0	0	0	0
1606	120959	1.006	69.19	68.8	0.997	16.85	16.9	1.025	17.67	17.24	0.987	17.76	17.99	1.014	16.92	16.68	1.1435	36.0938	2	2	2	0	0	0	0	0	0	0	0	0	0	0	0	0	0	0	0	0	0	0	0	0	0	0	0	0	0	0	0
1607	120960	1.056	68.04	64.41	1.019	13.65	13.4	1.068	17	15.92	1.102	20.53	18.63	1.025	16.87	16.46	1.1337	42.8782	2	2	2	0	0	0	0	0	0	0	0	0	0	0	0	0	0	0	0	0	0	0	0	0	0	0	0	0	0	0	0
1608	120962	0.761	43.24	56.82	0.712	9.2	12.92	0.775	11.22	14.47	0.718	10.38	14.45	0.832	12.45	14.97	1.1213	47.4491	2	2	2	0	0	0	0	0	0	0	0	0	0	0	0	0	0	0	0	0	0	0	0	0	0	0	0	0	0	0	0
1609	120965	0.881	47.67	54.11	0.824	10.51	12.76	0.927	11.89	12.83	0.92	13.27	14.43	0.851	11.99	14.09	1.1353	48.0991	2	2	2	0	0	0	0	0	0	0	0	0	0	0	0	0	0	0	0	0	0	0	0	0	0	0	0	0	0	0	0
1610	120967	1.107	68.65	62.03	0.959	13.1	13.66	1.098	17.06	15.54	1.183	19.59	16.56	1.162	18.9	16.27	1.1329	39.6689	2	2	2	0	0	0	0	0	0	0	0	0	0	0	0	0	0	0	0	0	0	0	0	0	0	0	0	0	0	0	0
1611	120968	0.937	62.33	66.54	0.849	12.31	14.51	0.883	13.69	15.51	0.988	17.23	17.44	1.001	19.1	19.09	1.1487	40.7047	2	2	2	0	0	0	0	0	0	0	0	0	0	0	0	0	0	0	0	0	0	0	0	0	0	0	0	0	0	0	0
1612	120983	0.788	44.67	56.66	0.748	9.1	12.16	0.707	8.68	12.27	0.833	13.02	15.63	0.836	13.87	16.6	1.1243	47.1118	2	2	2	0	0	0	0	0	0	0	0	0	0	0	0	0	0	0	0	0	0	0	0	0	0	0	0	0	0	0	0
1613	120992	0.884	51.73	58.5	0.804	10.98	13.66	0.925	13.29	14.37	0.968	14.31	14.78	0.837	13.15	15.7	1.1357	45.8809	2	2	2	0	0	0	0	0	0	0	0	0	0	0	0	0	0	0	0	0	0	0	0	0	0	0	0	0	0	0	0
1614	121001	0.911	57.78	63.45	0.929	12.53	13.49	0.882	13.39	15.18	0.913	14.98	16.42	0.919	16.87	18.36	1.1268	46.2576	2	2	2	0	0	0	0	0	0	0	0	0	0	0	0	0	0	0	0	0	0	0	0	0	0	0	0	0	0	0	0
1615	121005	1.122	63.91	56.97	1.064	16.02	15.06	1.091	14.26	13.08	1.186	17.43	14.7	1.146	16.2	14.13	1.1367	35.4088	2	2	2	0	0	0	0	0	0	0	0	0	0	0	0	0	0	0	0	0	0	0	0	0	0	0	0	0	0	0	0
1616	121006	1.058	50.63	47.88	0.862	8.43	9.79	0.99	10.68	10.79	1.132	12.94	11.43	1.17	18.58	15.88	1.1391	48.4029	2	2	2	0	0	0	0	0	0	0	0	0	0	0	0	0	0	0	0	0	0	0	0	0	0	0	0	0	0	0	0
1617	121020	1.005	61.65	61.35	0.955	13.75	14.4	1.038	14.8	14.26	1.041	16.75	16.1	0.985	16.35	16.6	1.1337	42.6159	2	2	2	0	0	0	0	0	0	0	0	0	0	0	0	0	0	0	0	0	0	0	0	0	0	0	0	0	0	0	0
1618	121029	0.784	52.4	66.8	0.792	13.25	16.74	0.821	13.19	16.08	0.772	13.39	17.35	0.756	12.58	16.63	1.1299	44.4121	2	2	2	0	0	0	0	0	0	0	0	0	0	0	0	0	0	0	0	0	0	0	0	0	0	0	0	0	0	0	0
1619	121038	0.962	61.61	64.01	0.925	13	14.06	0.992	14.74	14.86	0.943	15.74	16.69	0.986	18.12	18.39	1.1438	39.0529	2	2	2	0	0	0	0	0	0	0	0	0	0	0	0	0	0	0	0	0	0	0	0	0	0	0	0	0	0	0	0
1620	121053	0.808	38.5	47.63	0.816	9.04	11.07	0.795	9.06	11.41	0.824	10.41	12.64	0.798	9.99	12.51	1.1324	44.4483	2	2	2	0	0	0	0	0	0	0	0	0	0	0	0	0	0	0	0	0	0	0	0	0	0	0	0	0	0	0	0
1621	121058	1.024	69.66	68.04	0.966	14.9	15.42	1.002	16.95	16.91	1.083	17.96	16.58	1.038	19.86	19.13	1.1299	48.3257	2	2	2	0	0	0	0	0	0	0	0	0	0	0	0	0	0	0	0	0	0	0	0	0	0	0	0	0	0	0	0
1622	121065	0.934	44.85	48.02	0.879	9.31	10.59	0.958	10.52	10.99	0.939	11.44	12.19	0.952	13.57	14.26	1.1269	42.1958	2	2	2	0	0	0	0	0	0	0	0	0	0	0	0	0	0	0	0	0	0	0	0	0	0	0	0	0	0	0	0
1623	121067	1.169	76.1	65.08	1.042	16.14	15.49	1.081	17.29	15.99	1.22	20.08	16.46	1.318	22.59	17.14	1.1439	38.1943	2	1	2	0	1	0	0	0	0	0	0	0	0	0	0	17	1	0	0	0	0	0	0	0	0	0	0	0	0	0	0
1624	121068	0.95	66.86	70.37	0.892	12.58	14.09	1.021	15.61	15.29	1.008	17.6	17.45	0.896	21.08	23.54	1.1248	47.1051	2	2	2	0	0	0	0	0	0	0	0	0	0	0	0	0	0	0	0	0	0	0	0	0	0	0	0	0	0	0	0
1625	121072	0.9	67.09	74.52	0.792	13.11	16.56	0.88	15.43	17.54	0.973	19.11	19.64	0.936	19.44	20.78	1.1273	47.5916	2	2	2	0	0	0	0	0	0	0	0	0	0	0	0	0	0	0	0	0	0	0	0	0	0	0	0	0	0	0	0
1626	121078	1.176	88.86	75.54	1.164	18.92	16.26	1.272	21.98	17.28	1.196	21.19	17.71	1.102	26.77	24.3	1.1426	37.0375	2	2	2	0	0	0	0	0	0	0	0	0	0	0	0	0	0	0	0	0	0	0	0	0	0	0	0	0	0	0	0
1627	121089	0.939	51.49	54.81	0.885	10.39	11.75	0.961	11.54	12.01	0.978	12.46	12.75	0.934	17.09	18.3	1.1365	44.4188	2	2	2	0	0	0	0	0	0	0	0	0	0	0	0	0	0	0	0	0	0	0	0	0	0	0	0	0	0	0	0
1628	121104	0.929	31.88	34.3	0.898	9.24	10.29	0.934	10.6	11.35	0.952	12.04	12.66	1.096	12.91	11.78	1.1376	38.1573	2	2	2	0	0	0	0	0	0	0	0	0	0	0	0	0	0	0	0	0	0	0	0	0	0	0	0	0	0	0	0
1629	121115	1.191	74.91	62.89	1.113	15.38	13.83	1.173	16.28	13.88	1.27	22.46	17.68	1.187	20.78	17.51	1.1338	40.8601	2	2	2	0	0	0	0	0	0	0	0	0	0	0	0	0	0	0	0	0	0	0	0	0	0	0	0	0	0	0	0
1630	121117	1.036	65.15	62.91	0.979	15.11	15.44	1.089	16.83	15.46	1.027	15.73	15.32	1.048	17.49	16.69	1.1337	44.1178	2	2	2	0	0	0	0	0	0	0	0	0	0	0	0	0	0	0	0	0	0	0	0	0	0	0	0	0	0	0	0
1631	121123	1.17	64.42	55.06	1.211	14.71	12.15	1.156	15.53	13.43	1.145	16.94	14.79	1.174	17.24	14.69	1.1287	44.2132	2	2	2	0	0	0	0	0	0	0	0	0	0	0	0	0	0	0	0	0	0	0	0	0	0	0	0	0	0	0	0
1632	121126	0.918	48.71	53.08	0.787	9.49	12.07	0.845	10.08	11.94	1.005	14.35	14.27	0.999	14.79	14.8	1.1582	45.4277	2	2	2	0	0	0	0	0	0	0	0	0	0	0	0	0	0	0	0	0	0	0	0	0	0	0	0	0	0	0	0
1633	121147	1.043	64.24	61.57	0.988	13.57	13.74	1.031	15.41	14.94	1.093	17.02	15.57	1.054	18.24	17.31	1.127	48.9771	2	2	2	0	0	0	0	0	0	0	0	0	0	0	0	0	0	0	0	0	0	0	0	0	0	0	0	0	0	0	0
1634	121154	1.093	52.47	47.99	1.021	10.21	9.99	1.036	11.61	11.21	1.097	13.37	12.19	1.184	17.28	14.6	1.1326	47.8785	2	2	2	0	0	0	0	0	0	0	0	0	0	0	0	0	0	0	0	0	0	0	0	0	0	0	0	0	0	0	0
1635	121157	1.014	79.11	78.02	0.937	17.19	18.36	1.017	18.58	18.28	1.065	22.15	20.79	1.029	21.19	20.59	1.1302	45.4038	2	2	2	0	0	0	0	0	0	0	0	0	0	0	0	0	0	0	0	0	0	0	0	0	0	0	0	0	0	0	0
1636	121160	1.216	89.06	73.26	1.192	21.43	17.98	1.227	23.67	19.29	1.215	21.01	17.3	1.228	22.96	18.7	1.1415	40.6765	2	2	2	0	0	0	0	0	0	0	0	0	0	0	0	0	0	0	0	0	0	0	0	0	0	0	0	0	0	0	0
1637	121163	0.745	44.96	60.39	0.758	10.36	13.67	0.767	12.4	16.16	0.772	11.09	14.37	0.687	11.11	16.18	1.1297	43.875	2	2	2	0	0	0	0	0	0	0	0	0	0	0	0	0	0	0	0	0	0	0	0	0	0	0	0	0	0	0	0
1638	121173	0.936	45.95	49.09	0.94	10.22	10.88	0.899	10.09	11.23	0.918	10.73	11.69	0.974	14.9	15.3	1.1324	42.0917	2	2	2	0	0	0	0	0	0	0	0	0	0	0	0	0	0	0	0	0	0	0	0	0	0	0	0	0	0	0	0
1639	121175	1.277	84.21	65.96	1.109	19.01	17.14	1.236	19.71	15.94	1.358	21.49	15.83	1.408	24	17.05	1.1333	44.7566	2	2	2	0	0	0	0	0	0	0	0	0	0	0	0	0	0	0	0	0	0	0	0	0	0	0	0	0	0	0	0
1640	121176	1.199	72.3	60.3	1.119	14.16	12.65	1.152	14.61	12.69	1.254	19.68	15.69	1.238	23.85	19.27	1.1332	43.7127	2	2	2	0	0	0	0	0	0	0	0	0	0	0	0	0	0	0	0	0	0	0	0	0	0	0	0	0	0	0	0
1641	121178	1.034	61.8	59.77	1.003	13.74	13.69	0.956	12.63	13.21	1.052	17.42	16.55	1.104	18.02	16.32	1.1251	42.1212	2	2	2	0	0	0	0	0	0	0	0	0	0	0	0	0	0	0	0	0	0	0	0	0	0	0	0	0	0	0	0
1642	121204	0.8	45.19	56.46	0.783	10.49	13.4	0.83	11.02	13.27	0.821	12.07	14.71	0.771	11.62	15.08	1.151	44.8037	2	2	1	0	0	1	0	0	0	0	0	0	0	0	0	0	0	0	0	0	0	0	0	0	0	0	0	0	0	0	0
1643	121205	0.633	44.45	70.21	0.562	9.21	16.39	0.59	10.23	17.34	0.684	11.67	17.08	0.687	13.34	19.41	1.1348	42.6527	2	2	2	0	0	0	0	0	0	0	0	0	0	0	0	0	0	0	0	0	0	0	0	0	0	0	0	0	0	0	0
1644	121207	0.813	52.89	65.08	0.751	11.62	15.48	0.772	13.53	17.52	0.863	15.89	18.42	0.867	11.85	13.67	1.1473	42.694	2	2	2	0	0	0	0	0	0	0	0	0	0	0	0	0	0	0	0	0	0	0	0	0	0	0	0	0	0	0	0
1645	121209	1.192	70.92	59.51	1.162	15.02	12.93	1.166	15.65	13.42	1.242	19.51	15.71	1.188	20.74	17.45	1.1406	48.2564	2	2	2	0	0	0	0	0	0	0	0	0	0	0	0	0	0	0	0	0	0	0	0	0	0	0	0	0	0	0	0
1646	121243	0.804	44.76	55.66	0.778	9.8	12.59	0.809	11.17	13.81	0.817	11.63	14.24	0.81	12.17	15.01	1.1294	50.2146	2	2	2	0	0	0	0	0	0	0	0	0	0	0	0	0	0	0	0	0	0	0	0	0	0	0	0	0	0	0	0
1647	121249	0.893	65.6	73.48	0.879	14.73	16.76	0.937	16.41	17.52	0.88	16.21	18.43	0.879	18.25	20.77	1.1548	42.36	2	2	2	0	0	0	0	0	0	0	0	0	0	0	0	0	0	0	0	0	0	0	0	0	0	0	0	0	0	0	0
1648	121251	0.947	66.34	70.02	0.967	15.8	16.35	1.02	17.14	16.8	0.944	16.24	17.22	0.873	17.16	19.65	1.1247	39.7964	2	2	2	0	0	0	0	0	0	0	0	0	0	0	0	0	0	0	0	0	0	0	0	0	0	0	0	0	0	0	0
1649	121253	0.872	46.41	53.19	0.81	8.95	11.05	0.906	11.55	12.75	0.888	12.63	14.22	0.875	13.28	15.17	1.1573	43.7667	2	2	2	0	0	0	0	0	0	0	0	0	0	0	0	0	0	0	0	0	0	0	0	0	0	0	0	0	0	0	0
1650	121260	0.864	42.03	48.62	0.743	8.02	10.79	0.885	11.17	12.61	0.883	10.29	11.65	0.925	12.55	13.57	1.1489	41.9975	2	2	2	0	0	0	0	0	0	0	0	0	0	0	0	0	0	0	0	0	0	0	0	0	0	0	0	0	0	0	0
1651	121272	1.599	119.2	74.56	1.572	27.43	17.45	1.555	29.45	18.94	1.632	32.67	20.02	1.634	29.65	18.14	1.1313	46.3292	2	2	2	0	0	0	0	0	0	0	0	0	0	0	0	0	0	0	0	0	0	0	0	0	0	0	0	0	0	0	0
1652	121274	1.285	87.01	67.71	1.261	19.86	15.75	1.251	20.16	16.12	1.302	22.32	17.14	1.319	24.67	18.71	1.147	35.396	2	2	2	0	0	0	0	0	0	0	0	0	0	0	0	0	0	0	0	0	0	0	0	0	0	0	0	0	0	0	0
1653	121294	0.914	44.99	49.22	0.828	10.53	12.73	0.868	9.03	10.4	0.954	12.92	13.54	0.997	12.51	12.55	1.1296	45.6356	2	2	2	0	0	0	0	0	0	0	0	0	0	0	0	0	0	0	0	0	0	0	0	0	0	0	0	0	0	0	0
1654	121299	0.906	48.19	53.21	0.913	10.73	11.76	0.901	11.33	12.57	0.921	12.78	13.87	0.89	13.36	15.01	1.1326	43.6086	2	2	2	0	0	0	0	0	0	0	0	0	0	0	0	0	0	0	0	0	0	0	0	0	0	0	0	0	0	0	0
1655	121313	1.053	64.37	61.12	0.961	12.92	13.44	1.038	16.21	15.62	1.101	18.69	16.98	1.097	16.55	15.08	1.1414	44.3585	2	2	2	0	0	0	0	0	0	0	0	0	0	0	0	0	0	0	0	0	0	0	0	0	0	0	0	0	0	0	0
1656	121315	1.016	69.23	68.16	0.969	14.63	15.09	1.055	16.16	15.33	1.03	17.21	16.71	1.009	21.23	21.04	1.1466	42.1008	2	2	2	0	0	0	0	0	0	0	0	0	0	0	0	0	0	0	0	0	0	0	0	0	0	0	0	0	0	0	0
1657	121321	1.111	75.71	68.16	1.103	15.27	13.84	1.148	17.87	15.57	1.08	18.2	16.86	1.113	24.37	21.9	1.148	34.9894	2	1	2	0	1	0	0	0	0	0	0	0	0	0	0	26	1	0	0	0	0	0	0	0	0	0	0	0	0	0	0
1658	121323	1.162	92.16	79.3	1.114	19.31	17.34	1.134	20.66	18.23	1.146	22.83	19.91	1.232	29.36	23.83	1.1513	42.1225	2	2	2	0	0	0	0	0	0	0	0	0	0	0	0	0	0	0	0	0	0	0	0	0	0	0	0	0	0	0	0
1659	121325	0.832	52.65	63.26	0.776	11.47	14.78	0.813	12.01	14.77	0.858	13.52	15.76	0.872	15.65	17.95	1.15	40.1571	2	2	2	0	0	0	0	0	0	0	0	0	0	0	0	0	0	0	0	0	0	0	0	0	0	0	0	0	0	0	0
1660	121326	1.022	55.47	54.27	0.971	11.02	11.34	0.992	12.96	13.07	1.049	15.04	14.34	1.061	16.45	15.51	1.1297	48.1191	2	2	2	0	0	0	0	0	0	0	0	0	0	0	0	0	0	0	0	0	0	0	0	0	0	0	0	0	0	0	0
1661	121329	0.856	48.14	56.21	0.783	9.88	12.62	0.886	12.22	13.8	0.868	12.25	14.12	0.879	13.78	15.67	1.1355	46.0334	2	1	2	0	1	0	0	0	0	0	0	0	0	0	0	15	1	0	0	0	0	0	0	0	0	0	0	0	0	0	0
1662	121330	0.938	47.77	50.91	0.941	11.36	12.07	0.918	10.49	11.42	0.968	13.12	13.55	0.923	12.8	13.87	1.1317	42.7192	2	2	2	0	0	0	0	0	0	0	0	0	0	0	0	0	0	0	0	0	0	0	0	0	0	0	0	0	0	0	0
1663	121334	0.799	46.43	58.15	0.738	9.91	13.43	0.765	10.71	14.01	0.836	12.07	14.43	0.844	13.74	16.27	1.1388	48.4282	2	2	2	0	0	0	0	0	0	0	0	0	0	0	0	0	0	0	0	0	0	0	0	0	0	0	0	0	0	0	0
1664	121337	0.979	69.63	71.11	0.894	14.03	15.68	0.944	17.91	18.97	1.003	19.24	19.18	1.068	18.45	17.28	1.1333	44.2548	2	2	2	0	0	0	0	0	0	0	0	0	0	0	0	0	0	0	0	0	0	0	0	0	0	0	0	0	0	0	0
1665	121341	1.01	62.76	62.16	0.945	14.63	15.49	1.044	14.59	13.97	1.026	15.82	15.42	1.026	17.73	17.29	1.1571	40.3929	2	2	2	0	0	0	0	0	0	0	0	0	0	0	0	0	0	0	0	0	0	0	0	0	0	0	0	0	0	0	0
1666	121353	1.306	90.26	69.1	1.222	17.74	14.52	1.258	21.34	16.96	1.335	22.49	16.84	1.38	28.69	20.78	1.1474	40.5836	2	2	2	0	0	0	0	0	0	0	0	0	0	0	0	0	0	0	0	0	0	0	0	0	0	0	0	0	0	0	0
1667	121359	0.973	47.2	48.54	0.953	11.92	12.51	0.997	12.22	12.25	0.994	11.43	11.5	0.948	11.63	12.27	1.1462	39.0337	2	2	2	0	0	0	0	0	0	0	0	0	0	0	0	0	0	0	0	0	0	0	0	0	0	0	0	0	0	0	0
1668	121360	1.54	121.55	78.91	1.406	25.1	17.85	1.536	29.02	18.89	1.556	32.72	21.03	1.642	34.72	21.14	1.1359	39.4903	2	2	2	0	0	0	0	0	0	0	0	0	0	0	0	0	0	0	0	0	0	0	0	0	0	0	0	0	0	0	0
1669	121368	0.876	58.34	66.63	0.813	11.58	14.23	0.928	14.38	15.5	0.861	14.8	17.19	0.893	17.59	19.71	1.1506	44.0441	2	2	2	0	0	0	0	0	0	0	0	0	0	0	0	0	0	0	0	0	0	0	0	0	0	0	0	0	0	0	0
1670	121373	1.087	66.49	61.17	0.99	13.1	13.24	1.043	13.25	12.71	1.102	18.73	17	1.175	21.41	18.22	1.1494	39.1514	2	2	2	0	0	0	0	0	0	0	0	0	0	0	0	0	0	0	0	0	0	0	0	0	0	0	0	0	0	0	0
1671	121383	1.366	104.28	76.36	1.295	23.9	18.45	1.331	21.84	16.41	1.384	27.43	19.82	1.434	31.1	21.69	1.1287	43.3111	2	2	2	0	0	0	0	0	0	0	0	0	0	0	0	0	0	0	0	0	0	0	0	0	0	0	0	0	0	0	0
1672	121384	0.959	61.9	64.56	0.921	12.61	13.69	1.016	18.4	18.11	0.957	15.51	16.21	0.929	15.38	16.56	1.1347	46.1124	2	2	2	0	0	0	0	0	0	0	0	0	0	0	0	0	0	0	0	0	0	0	0	0	0	0	0	0	0	0	0
1673	121393	0.888	44.48	50.11	0.752	8.69	11.55	0.83	9.55	11.5	0.962	13.33	13.85	0.978	12.91	13.2	1.1556	44.4067	2	2	2	0	0	0	0	0	0	0	0	0	0	0	0	0	0	0	0	0	0	0	0	0	0	0	0	0	0	0	0
1674	121395	0.98	51.44	52.47	0.962	11.08	11.53	1.007	12.4	12.32	1.034	14.88	14.39	0.919	13.08	14.24	1.1463	36.8591	2	2	2	0	0	0	0	0	0	0	0	0	0	0	0	0	0	0	0	0	0	0	0	0	0	0	0	0	0	0	0
1675	121406	0.927	62.47	67.37	0.907	14.55	16.04	0.917	14.1	15.38	0.953	16.02	16.81	0.93	17.8	19.14	1.1379	48.0516	2	2	2	0	0	0	0	0	0	0	0	0	0	0	0	0	0	0	0	0	0	0	0	0	0	0	0	0	0	0	0
1676	121407	1.228	68.51	55.78	1.139	14.96	13.14	1.184	14.71	12.42	1.269	17.44	13.74	1.299	21.4	16.47	1.1377	42.2407	2	2	2	0	0	0	0	0	0	0	0	0	0	0	0	0	0	0	0	0	0	0	0	0	0	0	0	0	0	0	0
1677	121410	0.892	46.53	52.18	0.911	11.63	12.77	0.908	11.24	12.38	0.924	11.76	12.73	0.832	11.91	14.31	1.1325	45.691	2	2	2	0	0	0	0	0	0	0	0	0	0	0	0	0	0	0	0	0	0	0	0	0	0	0	0	0	0	0	0
1678	121414	1.069	57.42	53.71	1.015	12.84	12.64	1.074	13.05	12.16	1.134	15.02	13.24	1.054	16.51	15.66	1.1321	46.5212	2	2	2	0	0	0	0	0	0	0	0	0	0	0	0	0	0	0	0	0	0	0	0	0	0	0	0	0	0	0	0
1679	121415	0.78	42.33	54.27	0.767	9.49	12.37	0.773	9.64	12.48	0.802	10.94	13.65	0.778	12.27	15.77	1.1366	47.7745	2	2	2	0	0	0	0	0	0	0	0	0	0	0	0	0	0	0	0	0	0	0	0	0	0	0	0	0	0	0	0
1680	121418	0.794	41.08	51.74	0.665	7.38	11.1	0.802	10.13	12.64	0.862	11.69	13.56	0.822	11.87	14.45	1.1558	44.9341	2	2	2	0	0	0	0	0	0	0	0	0	0	0	0	0	0	0	0	0	0	0	0	0	0	0	0	0	0	0	0
1681	121426	0.879	51.11	58.14	0.795	9.41	11.84	0.881	12.15	13.79	0.888	13.81	15.56	0.929	15.74	16.95	1.1521	40.3998	2	2	2	0	0	0	0	0	0	0	0	0	0	0	0	0	0	0	0	0	0	0	0	0	0	0	0	0	0	0	0
1682	121436	1.786	125.9	70.51	1.683	27.53	16.36	1.771	30.62	17.3	1.847	35.58	19.27	1.829	32.17	17.59	1.1465	37.0225	2	2	2	0	0	0	0	0	0	0	0	0	0	0	0	0	0	0	0	0	0	0	0	0	0	0	0	0	0	0	0
1683	121438	1.001	59.49	59.41	0.904	12.51	13.84	0.949	14.63	15.41	1.075	18.11	16.84	1.069	14.23	13.32	1.1364	50.5385	2	2	2	0	0	0	0	0	0	0	0	0	0	0	0	0	0	0	0	0	0	0	0	0	0	0	0	0	0	0	0
1684	121451	1.172	67.79	57.83	1.173	15.09	12.86	1.191	17.55	14.74	1.199	18.62	15.54	1.125	16.53	14.7	1.1336	44.2241	2	2	2	0	0	0	0	0	0	0	0	0	0	0	0	0	0	0	0	0	0	0	0	0	0	0	0	0	0	0	0
1685	121459	0.99	57.18	57.76	0.965	12.81	13.27	1.033	14.59	14.12	0.959	14.52	15.14	1.003	15.27	15.22	1.1433	38.454	2	2	2	0	0	0	0	0	0	0	0	0	0	0	0	0	0	0	0	0	0	0	0	0	0	0	0	0	0	0	0
1686	121460	0.947	50.13	52.95	0.952	11.31	11.88	0.981	12	12.24	0.929	13.07	14.08	0.932	13.74	14.75	1.1289	44.7298	2	2	2	0	0	0	0	0	0	0	0	0	0	0	0	0	0	0	0	0	0	0	0	0	0	0	0	0	0	0	0
1687	121465	1.243	85.86	69.06	1.127	14.47	12.84	1.164	17.6	15.12	1.295	24.43	18.88	1.321	29.35	22.22	1.1313	40.8886	2	2	2	0	0	0	0	0	0	0	0	0	0	0	0	0	0	0	0	0	0	0	0	0	0	0	0	0	0	0	0
1688	121467	0.971	49.39	50.89	0.857	10.26	11.97	0.906	11.32	12.49	1.055	14.64	13.88	1.05	13.17	12.55	1.1323	48.0346	2	2	2	0	0	0	0	0	0	0	0	0	0	0	0	0	0	0	0	0	0	0	0	0	0	0	0	0	0	0	0
1689	121473	1.128	77.93	69.11	1.048	15.99	15.26	1.185	18.95	15.99	1.184	22.72	19.18	1.085	20.27	18.69	1.1413	47.772	2	2	2	0	0	0	0	0	0	0	0	0	0	0	0	0	0	0	0	0	0	0	0	0	0	0	0	0	0	0	0
1690	121475	0.757	44.89	59.27	0.738	10.2	13.83	0.723	10.15	14.04	0.79	11.88	15.04	0.774	12.66	16.36	1.1465	42.1273	2	2	1	0	0	3	0	0	0	0	0	0	0	0	0	0	0	0	0	0	0	0	0	0	0	0	0	0	0	0	0
1691	121484	1.046	58.34	55.8	0.909	11.36	12.49	1.027	14.27	13.9	1.182	16.05	13.59	1.053	16.66	15.82	1.1475	43.3745	2	2	2	0	0	0	0	0	0	0	0	0	0	0	0	0	0	0	0	0	0	0	0	0	0	0	0	0	0	0	0
1692	121494	1.062	61.09	57.53	1.019	13.25	13.01	1.126	13.49	11.98	1.072	14.62	13.64	1.044	19.73	18.9	1.1258	41.8399	2	2	2	0	0	0	0	0	0	0	0	0	0	0	0	0	0	0	0	0	0	0	0	0	0	0	0	0	0	0	0
1693	121506	1.26	86.86	68.93	1.158	17.26	14.91	1.244	20.1	16.17	1.346	25.67	19.07	1.269	23.82	18.78	1.1342	45.1479	2	2	2	0	0	0	0	0	0	0	0	0	0	0	0	0	0	0	0	0	0	0	0	0	0	0	0	0	0	0	0
1694	121508	0.713	37.6	52.75	0.69	7.61	11.03	0.704	8.47	12.02	0.721	9.55	13.25	0.728	11.97	16.45	1.1522	45.3613	2	2	2	0	0	0	0	0	0	0	0	0	0	0	0	0	0	0	0	0	0	0	0	0	0	0	0	0	0	0	0
1695	121526	0.997	61.48	61.67	0.941	11.82	12.56	1.04	15.33	14.74	1.033	17.29	16.73	0.966	17.04	17.64	1.1426	41.4336	2	2	2	0	0	0	0	0	0	0	0	0	0	0	0	0	0	0	0	0	0	0	0	0	0	0	0	0	0	0	0
1696	121549	0.763	37.15	48.68	0.731	8.11	11.1	0.735	8.83	12.02	0.821	9.88	12.03	0.763	10.32	13.53	1.1516	41.5297	2	2	2	0	0	0	0	0	0	0	0	0	0	0	0	0	0	0	0	0	0	0	0	0	0	0	0	0	0	0	0
1697	121559	1.048	53.07	50.64	1.019	10.07	9.88	1.104	12.79	11.58	1.057	15.77	14.92	1.013	14.45	14.26	1.1348	49.6539	2	2	2	0	0	0	0	0	0	0	0	0	0	0	0	0	0	0	0	0	0	0	0	0	0	0	0	0	0	0	0
1698	121561	0.878	49.26	56.11	0.791	9.88	12.49	0.922	12.09	13.11	0.937	13.48	14.38	0.856	13.81	16.13	1.1343	48.1547	2	1	2	0	1	0	0	0	0	0	0	0	0	0	0	38	1	0	0	0	0	0	0	0	0	0	0	0	0	0	0
1699	121569	1.118	63.63	56.89	1.1	15.55	14.13	1.065	15.57	14.62	1.112	15.28	13.74	1.196	17.23	14.41	1.1523	43.2385	2	2	2	0	0	0	0	0	0	0	0	0	0	0	0	0	0	0	0	0	0	0	0	0	0	0	0	0	0	0	0
1700	121576	1.15	63.86	55.53	1.026	12.5	12.18	1.128	14.99	13.28	1.211	17.36	14.33	1.209	19.01	15.73	1.1303	48.5189	2	2	2	0	0	0	0	0	0	0	0	0	0	0	0	0	0	0	0	0	0	0	0	0	0	0	0	0	0	0	0
1701	121580	0.991	60.08	60.61	0.912	11.76	12.9	0.982	13.49	13.74	1.032	16.04	15.54	1.02	18.78	18.42	1.1469	40.0969	2	2	2	0	0	0	0	0	0	0	0	0	0	0	0	0	0	0	0	0	0	0	0	0	0	0	0	0	0	0	0
1702	121588	0.816	56.59	69.32	0.784	11.92	15.21	0.814	13.97	17.17	0.829	14.85	17.91	0.833	15.85	19.03	1.1391	44.9974	2	2	2	0	0	0	0	0	0	0	0	0	0	0	0	0	0	0	0	0	0	0	0	0	0	0	0	0	0	0	0
1703	121590	0.828	37.73	45.6	0.779	7.7	9.88	0.816	8.62	10.56	0.864	10.62	12.3	0.84	10.8	12.86	1.1469	40.085	2	1	2	0	1	0	0	0	0	0	0	0	0	0	0	8	1	0	0	0	0	0	0	0	0	0	0	0	0	0	0
1704	121593	1.025	54.41	53.07	0.929	10.16	10.93	1.06	12.94	12.2	1.068	14.49	13.57	1.028	16.83	16.37	1.1324	41.3871	2	2	2	0	0	0	0	0	0	0	0	0	0	0	0	0	0	0	0	0	0	0	0	0	0	0	0	0	0	0	0
1705	121595	0.844	49.87	59.06	0.73	10.31	14.13	0.831	10.95	13.17	0.948	13.56	14.3	0.862	15.05	17.47	1.1519	45.2964	2	2	2	0	0	0	0	0	0	0	0	0	0	0	0	0	0	0	0	0	0	0	0	0	0	0	0	0	0	0	0
1706	121597	1.032	82.62	80.08	0.953	16.1	16.89	1.048	19.82	18.91	1.072	22.74	21.22	1.039	23.96	23.06	1.1426	40.1677	2	2	2	0	0	0	0	0	0	0	0	0	0	0	0	0	0	0	0	0	0	0	0	0	0	0	0	0	0	0	0
1707	121618	1.105	58.35	52.8	1.06	12.49	11.79	1.071	13.12	12.25	1.128	15.64	13.87	1.148	17.1	14.89	1.1309	40.7218	2	2	2	0	0	0	0	0	0	0	0	0	0	0	0	0	0	0	0	0	0	0	0	0	0	0	0	0	0	0	0
1708	121629	0.658	30.88	46.95	0.576	6.3	10.94	0.6	6.75	11.25	0.729	8.74	11.99	0.711	9.08	12.77	1.1328	45.4119	2	2	2	0	0	0	0	0	0	0	0	0	0	0	0	0	0	0	0	0	0	0	0	0	0	0	0	0	0	0	0
1709	121635	0.64	39.52	61.72	0.549	7.47	13.6	0.618	8.57	13.88	0.711	12.6	17.72	0.658	10.87	16.53	1.1358	47.0648	2	2	2	0	0	0	0	0	0	0	0	0	0	0	0	0	0	0	0	0	0	0	0	0	0	0	0	0	0	0	0
1710	121647	1.008	67.27	66.76	0.958	14.95	15.61	1.004	16.55	16.49	1.012	18.1	17.88	1.053	17.67	16.78	1.1504	42.9866	2	2	2	0	0	0	0	0	0	0	0	0	0	0	0	0	0	0	0	0	0	0	0	0	0	0	0	0	0	0	0
1711	121668	1.116	66.42	59.52	1.154	15.88	13.76	1.153	17.75	15.4	1.094	15.96	14.59	1.067	16.83	15.77	1.1368	38.433	2	2	2	0	0	0	0	0	0	0	0	0	0	0	0	0	0	0	0	0	0	0	0	0	0	0	0	0	0	0	0
1712	121669	0.733	41.4	56.52	0.753	10.07	13.38	0.737	10.59	14.36	0.71	10.24	14.43	0.732	10.5	14.36	1.134	46.7708	2	2	2	0	0	0	0	0	0	0	0	0	0	0	0	0	0	0	0	0	0	0	0	0	0	0	0	0	0	0	0
1713	121675	0.912	62.61	68.62	0.826	12.45	15.07	0.924	16.01	17.34	0.99	17.89	18.06	0.896	16.25	18.14	1.1411	46.8081	2	2	2	0	0	0	0	0	0	0	0	0	0	0	0	0	0	0	0	0	0	0	0	0	0	0	0	0	0	0	0
1714	121692	0.868	53.1	61.16	0.8	10.68	13.34	0.899	11.74	13.07	0.902	14.66	16.25	0.865	16.01	18.5	1.145	41.8759	2	1	2	0	1	0	0	0	0	0	0	0	0	0	0	15	1	0	0	0	0	0	0	0	0	0	0	0	0	0	0
1715	121693	0.735	43.75	59.55	0.711	9.56	13.44	0.776	10.45	13.47	0.747	11.83	15.83	0.709	11.92	16.81	1.1328	47.6483	2	2	2	0	0	0	0	0	0	0	0	0	0	0	0	0	0	0	0	0	0	0	0	0	0	0	0	0	0	0	0
1716	121694	0.985	54.65	55.51	1.028	13.35	12.98	1.009	13.25	13.13	0.968	13.13	13.57	0.943	14.92	15.83	1.1514	42.7045	1	2	2	1	0	0	47	1	0	0	0	0	0	0	0	0	0	0	0	0	0	0	0	0	0	0	0	0	0	0	0
1717	121699	1.125	67.5	60.03	1.063	13.21	12.42	1.178	16.96	14.41	1.184	19.63	16.58	1.065	17.69	16.62	1.1559	40.9084	2	2	2	0	0	0	0	0	0	0	0	0	0	0	0	0	0	0	0	0	0	0	0	0	0	0	0	0	0	0	0
1718	121708	0.941	55.11	58.59	0.925	12.79	13.83	0.899	12.75	14.18	0.963	13.23	13.73	0.97	16.35	16.84	1.1301	43.9529	2	2	2	0	0	0	0	0	0	0	0	0	0	0	0	0	0	0	0	0	0	0	0	0	0	0	0	0	0	0	0
1719	121720	0.822	47.03	57.22	0.804	10.92	13.58	0.854	10.51	12.31	0.807	11.86	14.7	0.826	13.74	16.63	1.1379	50.274	2	1	2	0	1	0	0	0	0	0	0	0	0	0	0	5	1	0	0	0	0	0	0	0	0	0	0	0	0	0	0
1720	121728	0.914	55.47	60.66	0.852	12.36	14.51	0.908	12.53	13.8	0.957	15.52	16.21	0.933	15.06	16.14	1.1375	41.6431	2	2	2	0	0	0	0	0	0	0	0	0	0	0	0	0	0	0	0	0	0	0	0	0	0	0	0	0	0	0	0
1721	121750	1.167	91.58	78.45	1.074	23.41	21.79	1.158	20.53	17.72	1.184	21.16	17.87	1.257	26.48	21.06	1.1289	44.3446	2	2	2	0	0	0	0	0	0	0	0	0	0	0	0	0	0	0	0	0	0	0	0	0	0	0	0	0	0	0	0
1722	121767	1.314	86.81	66.09	1.385	18.06	13.04	1.319	19.55	14.82	1.327	22.89	17.25	1.255	26.31	20.98	1.1236	41.4065	2	2	2	0	0	0	0	0	0	0	0	0	0	0	0	0	0	0	0	0	0	0	0	0	0	0	0	0	0	0	0
1723	121775	1.017	79.46	78.1	0.99	16.75	16.92	1.064	19.18	18.03	0.999	20.83	20.85	1.018	22.7	22.29	1.1355	42.3172	2	2	2	0	0	0	0	0	0	0	0	0	0	0	0	0	0	0	0	0	0	0	0	0	0	0	0	0	0	0	0
1724	121778	0.98	57.72	58.87	0.872	11.33	12.99	1.018	15.36	15.1	0.993	15.53	15.65	1.024	15.5	15.13	1.1485	43.7173	2	2	2	0	0	0	0	0	0	0	0	0	0	0	0	0	0	0	0	0	0	0	0	0	0	0	0	0	0	0	0
1725	121785	0.968	53.38	55.12	0.917	11.92	13	0.963	11.74	12.19	0.929	13.74	14.79	1.055	15.97	15.14	1.1495	37.4464	2	2	2	0	0	0	0	0	0	0	0	0	0	0	0	0	0	0	0	0	0	0	0	0	0	0	0	0	0	0	0
1726	121791	0.822	42.81	52.09	0.748	8.06	10.77	0.792	8.8	11.11	0.886	12.18	13.74	0.836	13.77	16.47	1.144	51.6829	2	2	2	0	0	0	0	0	0	0	0	0	0	0	0	0	0	0	0	0	0	0	0	0	0	0	0	0	0	0	0
1727	121796	1.156	88.72	76.73	1.031	18.2	17.66	1.15	20.27	17.64	1.226	23.87	19.47	1.201	26.39	21.98	1.1321	47.7871	2	2	1	0	0	1	0	0	0	0	0	0	0	0	0	0	0	0	0	0	0	0	0	0	0	0	0	0	0	0	0
1728	121816	1.214	71.98	59.28	1.061	14.07	13.26	1.195	17.6	14.74	1.271	20.49	16.12	1.307	19.82	15.16	1.1314	44.9811	2	2	2	0	0	0	0	0	0	0	0	0	0	0	0	0	0	0	0	0	0	0	0	0	0	0	0	0	0	0	0
1729	121821	1.217	61.02	50.13	1.197	15.12	12.64	1.239	13.24	10.69	1.187	15.41	12.98	1.249	17.26	13.82	1.1312	39.7005	2	2	2	0	0	0	0	0	0	0	0	0	0	0	0	0	0	0	0	0	0	0	0	0	0	0	0	0	0	0	0
1730	121822	0.828	46.7	56.37	0.709	8.9	12.56	0.83	10.09	12.16	0.858	13.63	15.88	0.893	14.08	15.77	1.1557	41.7235	2	2	2	0	0	0	0	0	0	0	0	0	0	0	0	0	0	0	0	0	0	0	0	0	0	0	0	0	0	0	0
1731	121824	0.901	48.85	54.24	0.848	11.11	13.1	0.907	11.82	13.04	0.906	12.45	13.73	0.937	13.47	14.37	1.1464	44.4846	2	2	2	0	0	0	0	0	0	0	0	0	0	0	0	0	0	0	0	0	0	0	0	0	0	0	0	0	0	0	0
1732	121827	1.054	54.55	51.74	0.976	10.58	10.84	1.035	12.95	12.51	1.086	14.87	13.69	1.098	16.16	14.71	1.1308	46.7045	2	2	2	0	0	0	0	0	0	0	0	0	0	0	0	0	0	0	0	0	0	0	0	0	0	0	0	0	0	0	0
1733	121830	0.905	47.11	52.06	0.797	10.44	13.09	0.906	12.36	13.65	0.962	13.92	14.46	0.957	10.39	10.86	1.1356	49.7229	2	2	2	0	0	0	0	0	0	0	0	0	0	0	0	0	0	0	0	0	0	0	0	0	0	0	0	0	0	0	0
1734	121831	0.965	56.24	58.25	0.954	13.07	13.7	0.924	12.95	14.01	1.021	15.89	15.57	0.957	14.33	14.97	1.1513	42.8073	2	2	2	0	0	0	0	0	0	0	0	0	0	0	0	0	0	0	0	0	0	0	0	0	0	0	0	0	0	0	0
1735	121844	0.91	49.38	54.25	0.799	10.33	12.93	0.905	13.82	15.27	0.959	14.51	15.13	0.982	10.72	10.92	1.1525	42.8648	2	2	2	0	0	0	0	0	0	0	0	0	0	0	0	0	0	0	0	0	0	0	0	0	0	0	0	0	0	0	0
1736	121847	1.163	57.43	49.36	1.083	12.24	11.3	1.23	15.02	12.21	1.19	17.96	15.09	1.135	12.21	10.76	1.1194	43.0577	2	1	2	0	1	0	0	0	0	0	0	0	0	0	0	62	2	2	0	0	0	0	0	0	0	0	0	0	0	0	0
1737	121867	1.268	81.8	64.5	1.201	16.92	14.09	1.206	19.75	16.38	1.317	21.38	16.23	1.334	23.75	17.81	1.1246	45.6973	2	2	2	0	0	0	0	0	0	0	0	0	0	0	0	0	0	0	0	0	0	0	0	0	0	0	0	0	0	0	0
1738	121872	1.13	79.98	70.81	1.056	16.66	15.78	1.104	19.23	17.42	1.213	21.6	17.8	1.135	22.5	19.81	1.143	39.875	2	1	2	0	1	0	0	0	0	0	0	0	0	0	0	45	1	0	0	0	0	0	0	0	0	0	0	0	0	0	0
1739	121873	0.647	31.1	48.08	0.614	6.19	10.08	0.704	8.27	11.75	0.666	8.28	12.43	0.604	8.36	13.83	1.131	46.2317	2	2	2	0	0	0	0	0	0	0	0	0	0	0	0	0	0	0	0	0	0	0	0	0	0	0	0	0	0	0	0
1740	121891	0.755	40.91	54.16	0.703	9.36	13.32	0.744	9.77	13.14	0.818	10.56	12.92	0.759	11.21	14.78	1.1532	41.846	2	1	2	0	9999	0	0	0	0	0	0	0	0	0	0	0	0	0	0	0	0	0	0	0	0	0	0	0	0	0	0
1741	121894	1.075	78.96	73.46	1.029	16.22	15.76	1.124	18.82	16.74	1.106	19.02	17.21	1.049	24.9	23.75	1.1477	40.8002	2	2	2	0	0	0	0	0	0	0	0	0	0	0	0	0	0	0	0	0	0	0	0	0	0	0	0	0	0	0	0
1742	121905	1.496	97.37	65.1	1.412	21.28	15.07	1.485	24.3	16.37	1.529	24.18	15.81	1.547	27.61	17.85	1.1418	38.3271	2	2	2	0	0	0	0	0	0	0	0	0	0	0	0	0	0	0	0	0	0	0	0	0	0	0	0	0	0	0	0
1743	121907	1.139	60.31	52.94	1.029	17.74	17.25	1.145	20.68	18.06	1.242	21.88	17.63	1.423	30.08	21.13	1.1235	45.0388	2	2	2	0	0	0	0	0	0	0	0	0	0	0	0	0	0	0	0	0	0	0	0	0	0	0	0	0	0	0	0
1744	121917	0.861	44.52	51.71	0.848	9.9	11.67	0.869	11.43	13.15	0.861	11.82	13.73	0.864	11.37	13.16	1.137	47.502	2	2	2	0	0	0	0	0	0	0	0	0	0	0	0	0	0	0	0	0	0	0	0	0	0	0	0	0	0	0	0
1745	121927	1.133	56.78	50.11	1.061	11.56	10.9	1.141	12.72	11.15	1.18	15.32	12.98	1.139	17.18	15.08	1.1532	40.4273	2	2	2	0	0	0	0	0	0	0	0	0	0	0	0	0	0	0	0	0	0	0	0	0	0	0	0	0	0	0	0
1746	121929	0.975	61.67	63.22	0.919	12.4	13.49	0.972	14.46	14.87	1.009	16.85	16.7	0.989	17.96	18.16	1.1299	42.8156	2	1	2	0	1	0	0	0	0	0	0	0	0	0	0	60	2	3	0	0	0	0	0	0	0	0	0	0	0	0	0
1747	121936	1.053	73.65	69.97	1.022	16.45	16.1	1.033	16.8	16.27	1.117	20.77	18.59	1.033	19.63	19	1.1447	39.0771	2	2	2	0	0	0	0	0	0	0	0	0	0	0	0	0	0	0	0	0	0	0	0	0	0	0	0	0	0	0	0
1748	121944	0.93	58.74	63.18	0.896	13.57	15.14	0.876	13.64	15.56	0.975	15.84	16.25	0.967	15.69	16.23	1.1331	44.5625	2	2	2	0	0	0	0	0	0	0	0	0	0	0	0	0	0	0	0	0	0	0	0	0	0	0	0	0	0	0	0
1749	121945	0.925	45.91	49.65	0.805	8.57	10.64	0.85	9.83	11.57	0.992	13.56	13.67	1.013	13.95	13.77	1.1583	43.5792	2	2	2	0	0	0	0	0	0	0	0	0	0	0	0	0	0	0	0	0	0	0	0	0	0	0	0	0	0	0	0
1750	121949	0.747	42.07	56.29	0.712	9.34	13.12	0.688	8.58	12.47	0.746	10.77	14.44	0.823	13.38	16.26	1.1467	42.1827	2	2	2	0	0	0	0	0	0	0	0	0	0	0	0	0	0	0	0	0	0	0	0	0	0	0	0	0	0	0	0
1751	121962	0.93	56.62	60.86	0.902	13.01	14.43	0.955	13.48	14.11	0.939	14.76	15.72	0.926	15.37	16.6	1.1533	38.5205	2	2	2	0	0	0	0	0	0	0	0	0	0	0	0	0	0	0	0	0	0	0	0	0	0	0	0	0	0	0	0
1752	121964	0.903	48.56	53.77	0.823	9.77	11.87	0.834	10.94	13.13	0.978	13.87	14.18	0.958	13.98	14.6	1.1494	42.4642	2	2	2	0	0	0	0	0	0	0	0	0	0	0	0	0	0	0	0	0	0	0	0	0	0	0	0	0	0	0	0
1753	121965	0.681	36.31	53.28	0.678	9.63	14.2	0.644	7.1	11.02	0.683	9.4	13.78	0.712	10.17	14.27	1.1375	47.2661	2	1	2	0	1	0	0	0	0	0	0	0	0	0	0	53	2	1	0	0	0	0	0	0	0	0	0	0	0	0	0
1754	121975	0.937	49.54	52.88	0.895	10.9	12.18	0.938	12.19	12.99	0.967	13.21	13.66	0.942	13.23	14.04	1.1321	42.7892	1	2	2	1	0	0	42	1	0	0	0	0	0	0	0	0	0	0	0	0	0	0	0	0	0	0	0	0	0	0	0
1755	121976	1.047	67.6	64.58	1.006	14.47	14.39	1.075	16.73	15.56	1.04	17.01	16.36	1.061	19.39	18.28	1.1297	41.8822	2	2	2	0	0	0	0	0	0	0	0	0	0	0	0	0	0	0	0	0	0	0	0	0	0	0	0	0	0	0	0
1756	121977	0.991	60.93	61.47	0.961	13.37	13.92	0.964	14.75	15.3	1.008	15.98	15.85	1.027	16.84	16.4	1.1506	39.6341	2	2	2	0	0	0	0	0	0	0	0	0	0	0	0	0	0	0	0	0	0	0	0	0	0	0	0	0	0	0	0
1757	121981	0.901	34	37.71	0.859	10.08	11.73	0.845	9.58	11.33	0.979	14.35	14.65	1.926	32.31	16.78	1.1302	46.9048	2	2	2	0	0	0	0	0	0	0	0	0	0	0	0	0	0	0	0	0	0	0	0	0	0	0	0	0	0	0	0
1758	121987	0.96	58.92	61.37	0.992	13.87	13.98	0.953	13.24	13.89	0.939	15.22	16.2	0.959	16.6	17.31	1.1273	43.2132	2	2	2	0	0	0	0	0	0	0	0	0	0	0	0	0	0	0	0	0	0	0	0	0	0	0	0	0	0	0	0
1759	121990	0.824	61.98	75.22	0.697	12.76	18.3	0.775	13.16	16.97	0.874	16.85	19.27	0.929	19.21	20.68	1.1361	43.32	2	2	2	0	0	0	0	0	0	0	0	0	0	0	0	0	0	0	0	0	0	0	0	0	0	0	0	0	0	0	0
1760	121993	1.202	82.22	68.39	1.169	19.83	16.96	1.15	16.45	14.31	1.228	21.53	17.54	1.247	24.42	19.59	1.1358	47.8513	2	2	2	0	0	0	0	0	0	0	0	0	0	0	0	0	0	0	0	0	0	0	0	0	0	0	0	0	0	0	0
1761	121995	0.844	40.52	48.02	0.82	9.09	11.08	0.825	9.61	11.64	0.886	10.56	11.93	0.842	11.26	13.37	1.1495	43.8793	2	2	2	0	0	0	0	0	0	0	0	0	0	0	0	0	0	0	0	0	0	0	0	0	0	0	0	0	0	0	0
1762	122030	0.939	46.52	49.56	0.849	9.43	11.11	0.912	10.71	11.75	0.976	12.24	12.54	0.998	14.14	14.16	1.128	43.9743	2	2	2	0	0	0	0	0	0	0	0	0	0	0	0	0	0	0	0	0	0	0	0	0	0	0	0	0	0	0	0
1763	122036	0.771	40.64	52.69	0.645	8.24	12.78	0.718	9.54	13.29	0.847	10.88	12.85	0.87	11.97	13.76	1.1493	44.6394	2	2	2	0	0	0	0	0	0	0	0	0	0	0	0	0	0	0	0	0	0	0	0	0	0	0	0	0	0	0	0
1764	122037	1.017	56.46	55.53	0.929	12.3	13.24	1.021	12.99	12.72	1.035	14.04	13.56	1.07	17.13	16.01	1.1304	40.0504	2	2	2	0	0	0	0	0	0	0	0	0	0	0	0	0	0	0	0	0	0	0	0	0	0	0	0	0	0	0	0
1765	122038	0.567	36.16	63.82	0.603	8.02	13.29	0.569	8.97	15.77	0.58	9.51	16.42	0.526	9.65	18.34	1.1366	46.1543	2	2	2	0	0	0	0	0	0	0	0	0	0	0	0	0	0	0	0	0	0	0	0	0	0	0	0	0	0	0	0
1766	122043	0.934	49.56	53.08	0.867	9.87	11.38	0.892	11.81	13.23	0.994	13.42	13.51	0.967	14.46	14.96	1.1414	39.2103	2	2	2	0	0	0	0	0	0	0	0	0	0	0	0	0	0	0	0	0	0	0	0	0	0	0	0	0	0	0	0
1767	122047	0.788	50.91	64.62	0.67	8.82	13.18	0.836	13.33	15.95	0.833	15.18	18.22	0.786	13.57	17.27	1.1406	40.2855	2	1	2	0	2	0	0	0	0	0	0	0	0	0	0	70	2	2	77	2	1	0	0	0	0	0	0	0	0	0	0
1768	122052	0.902	54.96	60.92	0.877	11.84	13.51	0.847	11.21	13.23	0.908	13.87	15.28	0.954	18.04	18.91	1.1332	45.4161	2	2	2	0	0	0	0	0	0	0	0	0	0	0	0	0	0	0	0	0	0	0	0	0	0	0	0	0	0	0	0
1769	122056	0.874	40.5	46.35	0.836	8.52	10.19	0.843	9.51	11.28	0.912	11.01	12.08	0.896	11.46	12.8	1.1523	42.7343	2	2	2	0	0	0	0	0	0	0	0	0	0	0	0	0	0	0	0	0	0	0	0	0	0	0	0	0	0	0	0
1770	122079	0.966	48.05	49.75	0.919	10.72	11.67	0.935	10.72	11.47	0.979	12.83	13.11	1.021	13.78	13.5	1.1331	46.6913	2	2	2	0	0	0	0	0	0	0	0	0	0	0	0	0	0	0	0	0	0	0	0	0	0	0	0	0	0	0	0
1771	122099	1.281	75.63	59.05	1.229	16.61	13.51	1.254	16.87	13.46	1.321	19.74	14.95	1.308	22.41	17.13	1.123	44.439	2	2	2	0	0	0	0	0	0	0	0	0	0	0	0	0	0	0	0	0	0	0	0	0	0	0	0	0	0	0	0
1772	122129	0.821	60.24	73.34	0.706	11.8	16.71	0.824	15.02	18.23	0.903	16.12	17.85	0.842	17.3	20.54	1.1296	43.6497	2	2	2	0	0	0	0	0	0	0	0	0	0	0	0	0	0	0	0	0	0	0	0	0	0	0	0	0	0	0	0
1773	122139	1.287	77.47	60.19	1.222	16.73	13.69	1.312	18.51	14.11	1.326	20.28	15.3	1.284	21.95	17.1	1.1387	45.4577	2	2	2	0	0	0	0	0	0	0	0	0	0	0	0	0	0	0	0	0	0	0	0	0	0	0	0	0	0	0	0
1774	122146	1.28	87.03	68	1.223	20.59	16.84	1.253	18.81	15.01	1.345	23.01	17.1	1.293	24.62	19.05	1.1507	41.8446	2	2	2	0	0	0	0	0	0	0	0	0	0	0	0	0	0	0	0	0	0	0	0	0	0	0	0	0	0	0	0
1775	122153	1.066	73.26	68.71	0.958	15.41	16.08	1.023	17.71	17.31	1.126	19.22	17.07	1.146	20.92	18.25	1.1343	37.2041	2	2	2	0	0	0	0	0	0	0	0	0	0	0	0	0	0	0	0	0	0	0	0	0	0	0	0	0	0	0	0
1776	122156	1.2	37.45	31.19	1.172	16.41	14	1.31	18.86	14.39	1.321	20.36	15.42	1.224	21.04	17.2	1.1336	38.0753	2	2	2	0	0	0	0	0	0	0	0	0	0	0	0	0	0	0	0	0	0	0	0	0	0	0	0	0	0	0	0
1777	122166	1.289	105.72	81.99	1.207	21.72	17.99	1.253	23.62	18.85	1.31	27.3	20.84	1.362	33.09	24.3	1.1406	39.9396	2	2	2	0	0	0	0	0	0	0	0	0	0	0	0	0	0	0	0	0	0	0	0	0	0	0	0	0	0	0	0
1778	122168	0.943	54.38	57.67	0.856	10.77	12.59	0.883	12.2	13.82	0.963	12.92	13.42	1.036	18.48	17.84	1.1231	46.8975	2	2	2	0	0	0	0	0	0	0	0	0	0	0	0	0	0	0	0	0	0	0	0	0	0	0	0	0	0	0	0
1779	122188	0.903	54.18	59.99	0.851	11.24	13.21	0.927	12.87	13.88	0.957	15.51	16.21	0.872	14.55	16.69	1.1401	49.9089	2	2	2	0	0	0	0	0	0	0	0	0	0	0	0	0	0	0	0	0	0	0	0	0	0	0	0	0	0	0	0
1780	122189	0.743	46.87	63.07	0.768	11.56	15.06	0.744	11.02	14.81	0.759	12.78	16.83	0.703	11.51	16.38	1.1509	43.5478	2	2	2	0	0	0	0	0	0	0	0	0	0	0	0	0	0	0	0	0	0	0	0	0	0	0	0	0	0	0	0
1781	122193	0.897	46.38	51.72	0.829	9.59	11.56	0.819	9.78	11.94	0.942	12.53	13.3	0.971	14.48	14.91	1.1515	40.6949	2	2	2	0	0	0	0	0	0	0	0	0	0	0	0	0	0	0	0	0	0	0	0	0	0	0	0	0	0	0	0
1782	122208	0.972	48.71	50.12	0.945	11.94	12.64	1.005	12.17	12.11	0.972	13.61	14.01	0.967	10.98	11.36	1.1408	45.4709	2	2	2	0	0	0	0	0	0	0	0	0	0	0	0	0	0	0	0	0	0	0	0	0	0	0	0	0	0	0	0
1783	122214	1.113	71.67	64.39	1.162	15.14	13.03	1.159	17.59	15.17	1.15	19.23	16.72	1.013	19.72	19.47	1.1384	45.9966	2	2	2	0	0	0	0	0	0	0	0	0	0	0	0	0	0	0	0	0	0	0	0	0	0	0	0	0	0	0	0
1784	122219	0.971	67.67	69.71	0.889	13.19	14.84	0.973	16.27	16.72	0.981	17.74	18.08	1.02	20.47	20.07	1.1291	40.8077	2	2	2	0	0	0	0	0	0	0	0	0	0	0	0	0	0	0	0	0	0	0	0	0	0	0	0	0	0	0	0
1785	122223	0.974	64	65.68	0.962	14.29	14.85	0.996	16.22	16.29	0.975	17.17	17.62	0.964	16.31	16.92	1.1485	37.1054	2	1	2	0	1	0	0	0	0	0	0	0	0	0	0	14	1	0	0	0	0	0	0	0	0	0	0	0	0	0	0
1786	122235	1.156	76.69	66.33	1.081	16.53	15.29	1.139	19.45	17.08	1.219	21.56	17.69	1.177	19.16	16.28	1.1237	44.7923	2	2	2	0	0	0	0	0	0	0	0	0	0	0	0	0	0	0	0	0	0	0	0	0	0	0	0	0	0	0	0
1787	122237	0.912	55.02	60.33	0.866	10.79	12.47	0.886	12.26	13.84	0.918	14.81	16.13	0.96	17.17	17.89	1.1364	44.6888	2	2	2	0	0	0	0	0	0	0	0	0	0	0	0	0	0	0	0	0	0	0	0	0	0	0	0	0	0	0	0
1788	122245	0.959	54.18	56.51	0.874	11.57	13.23	0.97	13.27	13.68	0.988	15.51	15.7	0.996	13.83	13.89	1.1337	44.9801	2	2	2	0	0	0	0	0	0	0	0	0	0	0	0	0	0	0	0	0	0	0	0	0	0	0	0	0	0	0	0
1789	122250	1.189	92.93	78.15	1.089	19.24	17.68	1.133	20.91	18.45	1.214	23.44	19.3	1.291	29.34	22.73	1.1273	44.3179	2	2	2	0	0	0	0	0	0	0	0	0	0	0	0	0	0	0	0	0	0	0	0	0	0	0	0	0	0	0	0
1790	122283	1.261	90.57	71.82	1.269	19.73	15.55	1.223	20.81	17.02	1.289	23.56	18.28	1.262	26.47	20.98	1.129	42.4696	2	2	2	0	0	0	0	0	0	0	0	0	0	0	0	0	0	0	0	0	0	0	0	0	0	0	0	0	0	0	0
1791	122287	0.806	45.3	56.17	0.701	8.54	12.19	0.762	10.16	13.33	0.837	12.57	15.01	0.897	14.03	15.64	1.1586	46.3256	2	2	2	0	0	0	0	0	0	0	0	0	0	0	0	0	0	0	0	0	0	0	0	0	0	0	0	0	0	0	0
1792	122291	0.896	70.52	78.69	0.872	16.23	18.61	0.892	15.95	17.88	0.9	18.56	20.62	0.918	19.79	21.56	1.1296	46.4156	2	2	2	0	0	0	0	0	0	0	0	0	0	0	0	0	0	0	0	0	0	0	0	0	0	0	0	0	0	0	0
1793	122293	0.837	44.5	53.15	0.724	8.48	11.71	0.813	10.45	12.85	0.905	12.55	13.87	0.885	13.02	14.72	1.1423	39.7037	2	2	2	0	0	0	0	0	0	0	0	0	0	0	0	0	0	0	0	0	0	0	0	0	0	0	0	0	0	0	0
1794	122314	0.752	35.05	46.63	0.73	7.64	10.47	0.751	8.48	11.3	0.726	8.46	11.65	0.792	10.47	13.21	1.1426	42.3476	2	1	2	0	1	0	0	0	0	0	0	0	0	0	0	57	2	2	0	0	0	0	0	0	0	0	0	0	0	0	0
1795	122371	1.189	75.93	63.88	1.092	16.34	14.97	1.201	18.03	15.01	1.247	18.42	14.77	1.209	23.14	19.14	1.1314	46.6718	2	2	2	0	0	0	0	0	0	0	0	0	0	0	0	0	0	0	0	0	0	0	0	0	0	0	0	0	0	0	0
1796	122375	0.805	52.43	65.1	0.81	11.72	14.46	0.763	10.35	13.57	0.788	13.03	16.55	0.844	17.33	20.52	1.1446	41.0186	2	2	2	0	0	0	0	0	0	0	0	0	0	0	0	0	0	0	0	0	0	0	0	0	0	0	0	0	0	0	0
1797	122376	0.59	33.58	56.95	0.565	6.89	12.19	0.591	8.33	14.08	0.644	10.17	15.81	0.551	8.19	14.86	1.1467	43.6979	2	2	2	0	0	0	0	0	0	0	0	0	0	0	0	0	0	0	0	0	0	0	0	0	0	0	0	0	0	0	0
1798	122394	0.989	65.65	66.37	0.938	13.11	13.97	0.971	13.47	13.87	1.023	19.45	19.01	1.005	19.62	19.52	1.131	45.544	2	2	2	0	0	0	0	0	0	0	0	0	0	0	0	0	0	0	0	0	0	0	0	0	0	0	0	0	0	0	0
1799	122396	0.823	49.22	59.81	0.84	12.07	14.37	0.763	10.6	13.9	0.828	12.99	15.7	0.856	13.56	15.83	1.135	45.6037	2	2	2	0	0	0	0	0	0	0	0	0	0	0	0	0	0	0	0	0	0	0	0	0	0	0	0	0	0	0	0
1800	122400	1.427	88.37	61.94	1.454	18.55	12.76	1.388	21.6	15.56	1.479	23.19	15.68	1.395	25.03	17.94	1.1209	40.8892	2	2	2	0	0	0	0	0	0	0	0	0	0	0	0	0	0	0	0	0	0	0	0	0	0	0	0	0	0	0	0
1801	122414	0.925	55.58	60.05	0.901	11.87	13.18	0.911	13.49	14.81	0.931	14.71	15.8	0.953	15.51	16.26	1.1397	47.0128	2	2	2	0	0	0	0	0	0	0	0	0	0	0	0	0	0	0	0	0	0	0	0	0	0	0	0	0	0	0	0
1802	122415	1.029	67.51	65.61	1.086	17.27	15.9	1.099	17.92	16.3	1.019	15.73	15.44	0.924	16.59	17.97	1.1448	37.0981	2	2	2	0	0	0	0	0	0	0	0	0	0	0	0	0	0	0	0	0	0	0	0	0	0	0	0	0	0	0	0
1803	122424	1.052	55.61	52.87	1.025	12.53	12.22	1.041	12.26	11.78	1.075	13.94	12.97	1.062	16.88	15.9	1.1544	42.5747	2	2	2	0	0	0	0	0	0	0	0	0	0	0	0	0	0	0	0	0	0	0	0	0	0	0	0	0	0	0	0
1804	122425	1.218	89.51	73.51	1.116	19.67	17.62	1.195	20.57	17.22	1.266	23.06	18.21	1.281	26.21	20.46	1.1342	39.8796	2	2	2	0	0	0	0	0	0	0	0	0	0	0	0	0	0	0	0	0	0	0	0	0	0	0	0	0	0	0	0
1805	122442	1.062	64.25	60.48	0.891	12	13.46	0.998	12.95	12.98	1.101	16.41	14.91	1.196	22.88	19.14	1.1363	46.7785	2	2	2	0	0	0	0	0	0	0	0	0	0	0	0	0	0	0	0	0	0	0	0	0	0	0	0	0	0	0	0
1806	122456	1.041	48.88	46.97	1.009	10.82	10.72	1.065	12.46	11.7	1.067	12.86	12.06	1.02	12.74	12.49	1.1281	45.5123	2	2	2	0	0	0	0	0	0	0	0	0	0	0	0	0	0	0	0	0	0	0	0	0	0	0	0	0	0	0	0
1807	122463	1.408	92.05	65.36	1.404	19.35	13.79	1.481	23.34	15.76	1.417	24.41	17.23	1.343	24.94	18.57	1.1241	42.2971	2	2	2	0	0	0	0	0	0	0	0	0	0	0	0	0	0	0	0	0	0	0	0	0	0	0	0	0	0	0	0
1808	122473	1.183	68.18	57.65	1.111	16.98	15.29	1.22	18.08	14.83	1.19	15.99	13.44	1.216	17.13	14.09	1.1367	40.8574	2	2	2	0	0	0	0	0	0	0	0	0	0	0	0	0	0	0	0	0	0	0	0	0	0	0	0	0	0	0	0
1809	122475	1.143	62.96	55.06	1.003	11.37	11.33	1.064	11.77	11.07	1.187	17.78	14.98	1.246	22.04	17.68	1.1547	43.1899	2	2	2	0	0	0	0	0	0	0	0	0	0	0	0	0	0	0	0	0	0	0	0	0	0	0	0	0	0	0	0
1810	122493	1.156	71.66	62	1.153	15.25	13.22	1.116	16.36	14.67	1.184	18.98	16.02	1.165	21.07	18.09	1.1397	36.1681	2	2	2	0	0	0	0	0	0	0	0	0	0	0	0	0	0	0	0	0	0	0	0	0	0	0	0	0	0	0	0
1811	122502	0.948	47.73	50.34	0.896	11.52	12.86	0.91	10.75	11.81	1.055	13.77	13.05	0.926	11.7	12.63	1.1488	39.49	2	2	2	0	0	0	0	0	0	0	0	0	0	0	0	0	0	0	0	0	0	0	0	0	0	0	0	0	0	0	0
1812	122517	1.094	58.8	53.77	1.011	11.72	11.6	1.149	13.29	11.57	1.117	16.19	14.5	1.093	17.6	16.1	1.1414	38.8519	2	2	2	0	0	0	0	0	0	0	0	0	0	0	0	0	0	0	0	0	0	0	0	0	0	0	0	0	0	0	0
1813	122539	0.901	51.74	57.44	0.832	10.76	12.94	0.92	12.61	13.7	0.908	12.99	14.31	0.932	15.38	16.49	1.1361	42.3546	2	2	2	0	0	0	0	0	0	0	0	0	0	0	0	0	0	0	0	0	0	0	0	0	0	0	0	0	0	0	0
1814	122540	0.872	49.43	56.7	0.863	11.17	12.94	0.861	11.96	13.89	0.873	12.55	14.37	0.888	13.76	15.5	1.1356	45.4004	2	2	2	0	0	0	0	0	0	0	0	0	0	0	0	0	0	0	0	0	0	0	0	0	0	0	0	0	0	0	0
1815	122550	1.257	93.42	74.32	1.154	19.63	17.01	1.181	20.56	17.4	1.274	24.13	18.94	1.388	29.09	20.97	1.1441	42.6094	2	2	2	0	0	0	0	0	0	0	0	0	0	0	0	0	0	0	0	0	0	0	0	0	0	0	0	0	0	0	0
1816	122567	0.832	56.54	67.97	0.817	12.13	14.85	0.902	14.31	15.87	0.824	14.42	17.5	0.794	15.68	19.75	1.1528	44.91	2	2	2	0	0	0	0	0	0	0	0	0	0	0	0	0	0	0	0	0	0	0	0	0	0	0	0	0	0	0	0
1817	122569	1.085	64.64	59.56	0.968	12.85	13.27	1.11	14.65	13.19	1.092	17.6	16.12	1.151	19.54	16.97	1.1306	47.9972	2	2	2	0	0	0	0	0	0	0	0	0	0	0	0	0	0	0	0	0	0	0	0	0	0	0	0	0	0	0	0
1818	122571	1.11	81.43	73.39	0.95	15.5	16.31	1.085	19.76	18.21	1.18	22.89	19.4	1.196	23.27	19.45	1.1367	49.8192	2	2	2	0	0	0	0	0	0	0	0	0	0	0	0	0	0	0	0	0	0	0	0	0	0	0	0	0	0	0	0
1819	122572	0.93	59.26	63.74	0.831	12.92	15.55	0.961	14.77	15.37	1	16.46	16.46	0.923	15.11	16.37	1.1307	43.3516	2	2	2	0	0	0	0	0	0	0	0	0	0	0	0	0	0	0	0	0	0	0	0	0	0	0	0	0	0	0	0
1820	122574	0.611	29.78	48.75	0.535	5.9	11.03	0.593	6.51	10.97	0.641	8.68	13.54	0.658	8.69	13.21	1.1479	43.6144	2	2	2	0	0	0	0	0	0	0	0	0	0	0	0	0	0	0	0	0	0	0	0	0	0	0	0	0	0	0	0
1821	122575	1.118	81.43	72.81	1.035	16.21	15.67	1.107	22.46	20.29	1.128	23.16	20.52	1.2	19.59	16.33	1.1341	41.3963	2	2	2	0	0	0	0	0	0	0	0	0	0	0	0	0	0	0	0	0	0	0	0	0	0	0	0	0	0	0	0
1822	122576	0.833	46.67	56.06	0.764	9.05	11.84	0.796	10.75	13.51	0.844	12.12	14.36	0.902	14.75	16.36	1.1343	48.6904	2	2	2	0	0	0	0	0	0	0	0	0	0	0	0	0	0	0	0	0	0	0	0	0	0	0	0	0	0	0	0
1823	122595	1.037	70.51	67.96	0.937	13.93	14.87	0.988	15.32	15.5	1.073	19.85	18.5	1.122	21.41	19.09	1.1349	43.6748	2	2	2	0	0	0	0	0	0	0	0	0	0	0	0	0	0	0	0	0	0	0	0	0	0	0	0	0	0	0	0
1824	122612	0.828	44.86	54.18	0.688	8.32	12.09	0.785	10.4	13.24	0.872	12.04	13.81	0.939	14.11	15.03	1.1386	49.0204	2	2	2	0	0	0	0	0	0	0	0	0	0	0	0	0	0	0	0	0	0	0	0	0	0	0	0	0	0	0	0
1825	122629	1.321	83.11	62.89	1.227	22.09	18.01	1.338	26.84	20.06	1.479	29.89	20.22	1.377	34.18	24.82	1.1326	44.5286	2	2	2	0	0	0	0	0	0	0	0	0	0	0	0	0	0	0	0	0	0	0	0	0	0	0	0	0	0	0	0
1826	122636	0.724	37.02	51.12	0.705	8.17	11.59	0.703	9.3	13.22	0.706	9.02	12.78	0.779	10.54	13.53	1.1404	47.3534	2	2	2	0	0	0	0	0	0	0	0	0	0	0	0	0	0	0	0	0	0	0	0	0	0	0	0	0	0	0	0
1827	122647	1.061	61.78	58.21	0.909	11.85	13.04	1.052	14.37	13.66	1.13	16.4	14.52	1.127	19.15	17	1.1334	42.9168	2	2	2	0	0	0	0	0	0	0	0	0	0	0	0	0	0	0	0	0	0	0	0	0	0	0	0	0	0	0	0
1828	122649	0.836	48.87	58.49	0.807	9.8	12.15	0.838	12.12	14.46	0.795	11.86	14.92	0.89	15.09	16.95	1.1399	48.9534	2	2	2	0	0	0	0	0	0	0	0	0	0	0	0	0	0	0	0	0	0	0	0	0	0	0	0	0	0	0	0
1829	122655	0.9	48.01	53.36	0.881	10.2	11.58	0.907	10.86	11.98	0.881	13.22	15.01	0.928	13.73	14.79	1.1513	39.8802	2	2	2	0	0	0	0	0	0	0	0	0	0	0	0	0	0	0	0	0	0	0	0	0	0	0	0	0	0	0	0
1830	122664	0.818	47.15	57.63	0.721	9.13	12.68	0.854	11.84	13.86	0.879	14.19	16.15	0.802	11.98	14.94	1.1306	47.0779	2	2	2	0	0	0	0	0	0	0	0	0	0	0	0	0	0	0	0	0	0	0	0	0	0	0	0	0	0	0	0
1831	122673	1.042	71.96	69.08	0.97	13.82	14.25	1.046	16.37	15.65	1.095	19.67	17.97	1.042	22.11	21.21	1.1464	42.2076	2	2	2	0	0	0	0	0	0	0	0	0	0	0	0	0	0	0	0	0	0	0	0	0	0	0	0	0	0	0	0
1832	122678	1.198	68.47	57.15	1.061	13.1	12.34	1.176	16.81	14.3	1.296	20.19	15.58	1.231	18.37	14.93	1.1315	44.488	2	2	2	0	0	0	0	0	0	0	0	0	0	0	0	0	0	0	0	0	0	0	0	0	0	0	0	0	0	0	0
1833	122685	0.793	40.17	50.66	0.697	7.85	11.26	0.819	9.6	11.73	0.787	9.78	12.43	0.849	12.93	15.24	1.1389	39.4395	2	2	2	0	0	0	0	0	0	0	0	0	0	0	0	0	0	0	0	0	0	0	0	0	0	0	0	0	0	0	0
1834	122703	1.025	64.67	63.12	0.981	13.73	14	1.023	15.53	15.18	1.024	17.65	17.24	1.063	17.76	16.7	1.1365	48.1337	2	2	2	0	0	0	0	0	0	0	0	0	0	0	0	0	0	0	0	0	0	0	0	0	0	0	0	0	0	0	0
1835	122713	1.115	60.92	54.66	1.08	13.57	12.56	1.117	14.74	13.19	1.146	15.37	13.41	1.113	17.24	15.49	1.134	45.1255	2	2	2	0	0	0	0	0	0	0	0	0	0	0	0	0	0	0	0	0	0	0	0	0	0	0	0	0	0	0	0
1836	122717	0.907	50.41	55.56	0.822	9.53	11.6	0.906	11.94	13.18	0.925	14.68	15.87	0.956	14.25	14.91	1.1371	45.2904	2	2	2	0	0	0	0	0	0	0	0	0	0	0	0	0	0	0	0	0	0	0	0	0	0	0	0	0	0	0	0
1837	122720	0.77	33.37	43.34	0.674	6.41	9.51	0.798	8.15	10.21	0.801	9.02	11.27	0.793	9.79	12.35	1.1347	43.4142	2	2	2	0	0	0	0	0	0	0	0	0	0	0	0	0	0	0	0	0	0	0	0	0	0	0	0	0	0	0	0
1838	122721	0.559	29.7	53.16	0.488	5.79	11.87	0.577	6.99	12.1	0.598	8.2	13.73	0.564	8.72	15.47	1.1561	44.7023	2	2	2	0	0	0	0	0	0	0	0	0	0	0	0	0	0	0	0	0	0	0	0	0	0	0	0	0	0	0	0
1839	122730	1.133	72.82	64.26	1.115	15.39	13.8	1.164	18.32	15.73	1.14	18.49	16.22	1.114	20.62	18.51	1.131	45.8239	2	2	2	0	0	0	0	0	0	0	0	0	0	0	0	0	0	0	0	0	0	0	0	0	0	0	0	0	0	0	0
1840	122752	1.056	67.64	64.07	0.999	12.25	12.26	1.003	14.71	14.66	1.094	17.32	15.84	1.096	23.36	21.31	1.1351	40.2606	2	2	2	0	0	0	0	0	0	0	0	0	0	0	0	0	0	0	0	0	0	0	0	0	0	0	0	0	0	0	0
1841	122753	1.382	109.56	79.29	1.343	22.74	16.93	1.368	26.21	19.16	1.395	29.97	21.48	1.411	30.65	21.72	1.1251	43.2349	2	1	2	0	2	0	0	0	0	0	0	0	0	0	0	14	1	0	18	1	0	0	0	0	0	0	0	0	0	0	0
1842	122766	1.188	80.97	68.18	1.156	18.05	15.62	1.224	20.39	16.66	1.189	23.03	19.38	1.179	19.49	16.53	1.1538	42.254	2	1	2	0	1	0	0	0	0	0	0	0	0	0	0	15	1	0	0	0	0	0	0	0	0	0	0	0	0	0	0
1843	122776	0.97	65.07	67.07	0.845	11.5	13.62	0.933	15.38	16.49	1.024	18.49	18.06	1.042	19.69	18.9	1.1548	40.4616	2	2	2	0	0	0	0	0	0	0	0	0	0	0	0	0	0	0	0	0	0	0	0	0	0	0	0	0	0	0	0
1844	122780	1.275	102.5	80.42	1.139	20.8	18.26	1.24	25.53	20.58	1.36	28.44	20.92	1.342	27.72	20.66	1.1579	43.4451	2	2	2	0	0	0	0	0	0	0	0	0	0	0	0	0	0	0	0	0	0	0	0	0	0	0	0	0	0	0	0
1845	122783	0.7	32.52	46.47	0.65	7.93	12.19	0.73	9.22	12.63	0.674	8.15	12.09	0.756	7.23	9.56	1.1383	49.7182	2	1	2	0	1	0	0	0	0	0	0	0	0	0	0	70	2	1	0	0	0	0	0	0	0	0	0	0	0	0	0
1846	122791	0.914	50.22	54.96	0.818	9.9	12.11	0.933	11.92	12.77	0.986	13.37	13.56	0.91	15.02	16.51	1.137	45.4266	2	2	2	0	0	0	0	0	0	0	0	0	0	0	0	0	0	0	0	0	0	0	0	0	0	0	0	0	0	0	0
1847	122813	1.139	71.91	63.14	1.054	15.9	15.09	1.179	17.63	14.96	1.165	18.88	16.21	1.155	19.5	16.89	1.1461	40.3535	2	2	2	0	0	0	0	0	0	0	0	0	0	0	0	0	0	0	0	0	0	0	0	0	0	0	0	0	0	0	0
1848	122814	1.057	69.8	66.03	1.033	15.85	15.35	1.06	15.65	14.77	1.058	19.54	18.47	1.075	18.76	17.44	1.1332	46.313	2	2	2	0	0	0	0	0	0	0	0	0	0	0	0	0	0	0	0	0	0	0	0	0	0	0	0	0	0	0	0
1849	122842	1.057	66.05	62.49	0.972	12.76	13.12	1.076	16.21	15.06	1.115	18.2	16.33	1.051	18.89	17.98	1.1592	44.9201	2	2	2	0	0	0	0	0	0	0	0	0	0	0	0	0	0	0	0	0	0	0	0	0	0	0	0	0	0	0	0
1850	122848	1.211	75.4	62.25	1.173	16.93	14.43	1.194	17.56	14.71	1.277	20.8	16.28	1.195	20.11	16.83	1.1407	36.7939	2	2	1	0	0	1	0	0	0	0	0	0	0	0	0	0	0	0	0	0	0	0	0	0	0	0	0	0	0	0	0
1851	122864	1.015	73.5	72.4	0.891	13.91	15.61	0.996	17.01	17.08	1.103	18.43	16.71	1.05	24.15	23	1.1298	43.692	2	2	2	0	0	0	0	0	0	0	0	0	0	0	0	0	0	0	0	0	0	0	0	0	0	0	0	0	0	0	0
1852	122876	1.083	59.87	55.26	1.092	12.85	11.77	1.084	14.99	13.82	1.057	15.03	14.21	1.1	17.01	15.46	1.1337	42.4321	2	2	2	0	0	0	0	0	0	0	0	0	0	0	0	0	0	0	0	0	0	0	0	0	0	0	0	0	0	0	0
1853	122878	1.068	80.55	75.42	1.063	16.95	15.95	1.067	18.5	17.34	1.072	22.32	20.83	1.07	22.78	21.3	1.151	41.8639	2	2	2	0	0	0	0	0	0	0	0	0	0	0	0	0	0	0	0	0	0	0	0	0	0	0	0	0	0	0	0
1854	122881	0.861	39.31	45.65	0.807	9.13	11.31	0.775	7.5	9.69	0.946	12.5	13.21	0.89	10.18	11.44	1.1333	46.6439	2	2	2	0	0	0	0	0	0	0	0	0	0	0	0	0	0	0	0	0	0	0	0	0	0	0	0	0	0	0	0
1855	122888	1.261	85.19	67.57	1.334	21.52	16.13	1.259	20.43	16.22	1.219	18.85	15.46	1.235	24.39	19.75	1.151	36.5918	2	1	2	0	1	0	0	0	0	0	0	0	0	0	0	16	1	0	0	0	0	0	0	0	0	0	0	0	0	0	0
1856	122889	0.891	44.63	50.09	0.818	8.67	10.6	0.859	10.18	11.86	0.924	12.91	13.97	0.942	12.87	13.66	1.1532	42.0005	2	2	2	0	0	0	0	0	0	0	0	0	0	0	0	0	0	0	0	0	0	0	0	0	0	0	0	0	0	0	0
1857	122902	1.038	66.11	63.71	0.964	14.89	15.45	1.006	16.49	16.39	1.109	17.03	15.35	1.072	17.72	16.53	1.1255	47.962	2	1	2	0	1	0	0	0	0	0	0	0	0	0	0	11	1	0	0	0	0	0	0	0	0	0	0	0	0	0	0
1858	122909	1.13	65.12	57.62	1.04	14.12	13.58	1.109	14.64	13.2	1.161	16.5	14.21	1.195	19.86	16.63	1.1322	49.0353	2	2	2	0	0	0	0	0	0	0	0	0	0	0	0	0	0	0	0	0	0	0	0	0	0	0	0	0	0	0	0
1859	122915	0.973	55.54	57.08	0.932	12.9	13.85	0.972	12.67	13.03	0.992	13.72	13.83	0.992	16.25	16.38	1.1467	38.5067	2	2	2	0	0	0	0	0	0	0	0	0	0	0	0	0	0	0	0	0	0	0	0	0	0	0	0	0	0	0	0
1860	122922	0.728	40.97	56.3	0.724	9.47	13.08	0.763	11.1	14.56	0.719	9.5	13.21	0.706	10.91	15.45	1.1258	49.1038	2	2	2	0	0	0	0	0	0	0	0	0	0	0	0	0	0	0	0	0	0	0	0	0	0	0	0	0	0	0	0
1861	122928	0.835	44.99	53.88	0.81	9.94	12.28	0.825	9.96	12.07	0.828	11.4	13.76	0.868	13.69	15.77	1.1458	42.1713	2	2	2	0	0	0	0	0	0	0	0	0	0	0	0	0	0	0	0	0	0	0	0	0	0	0	0	0	0	0	0
1862	122930	1.56	109.91	70.44	1.541	26.38	17.11	1.596	25.49	15.98	1.567	28.32	18.08	1.541	29.71	19.28	1.1297	46.2641	2	2	2	0	0	0	0	0	0	0	0	0	0	0	0	0	0	0	0	0	0	0	0	0	0	0	0	0	0	0	0
1863	122943	0.678	34.2	50.44	0.665	7.04	10.58	0.708	9.7	13.69	0.695	9.37	13.48	0.638	8.09	12.69	1.1321	51.2433	2	2	2	0	0	0	0	0	0	0	0	0	0	0	0	0	0	0	0	0	0	0	0	0	0	0	0	0	0	0	0
1864	122945	0.886	47.13	53.19	0.878	10.36	11.8	0.899	10.85	12.07	0.928	13.3	14.34	0.843	12.62	14.98	1.1333	44.7373	2	1	2	0	1	0	0	0	0	0	0	0	0	0	0	39	1	0	0	0	0	0	0	0	0	0	0	0	0	0	0
1865	122950	1.098	57.38	52.24	1.076	12.34	11.47	1.097	12.83	11.69	1.14	16.14	14.16	1.077	16.07	14.92	1.1278	44.6805	2	2	2	0	0	0	0	0	0	0	0	0	0	0	0	0	0	0	0	0	0	0	0	0	0	0	0	0	0	0	0
1866	122953	1.496	127.15	85.01	1.447	29.36	20.29	1.466	31.9	21.77	1.493	31.28	20.96	1.574	34.61	21.99	1.1275	42.6803	2	2	2	0	0	0	0	0	0	0	0	0	0	0	0	0	0	0	0	0	0	0	0	0	0	0	0	0	0	0	0
1867	122956	0.909	41.11	45.21	0.937	9.08	9.7	0.939	11.09	11.81	0.926	10.63	11.48	0.844	10.31	12.21	1.1439	39.829	2	2	2	0	0	0	0	0	0	0	0	0	0	0	0	0	0	0	0	0	0	0	0	0	0	0	0	0	0	0	0
1868	122959	1.134	76.77	67.69	1.037	14.79	14.26	1.091	17.16	15.73	1.151	20.44	17.76	1.223	24.39	19.95	1.1451	40.4955	2	2	2	0	0	0	0	0	0	0	0	0	0	0	0	0	0	0	0	0	0	0	0	0	0	0	0	0	0	0	0
1869	122960	0.971	53.76	55.38	0.893	10.44	11.69	0.952	11.86	12.45	0.972	14.1	14.5	1.038	17.37	16.73	1.1392	38.0203	2	2	2	0	0	0	0	0	0	0	0	0	0	0	0	0	0	0	0	0	0	0	0	0	0	0	0	0	0	0	0
1870	122962	0.98	56.27	57.41	0.868	9.74	11.22	0.986	15.33	15.55	0.994	16.23	16.34	1.046	14.97	14.3	1.1547	39.1143	2	2	2	0	0	0	0	0	0	0	0	0	0	0	0	0	0	0	0	0	0	0	0	0	0	0	0	0	0	0	0
1871	122963	0.678	37.18	54.83	0.598	7.75	12.96	0.631	8.28	13.13	0.705	9.85	13.97	0.766	11.3	14.76	1.1335	47.906	2	2	2	0	0	0	0	0	0	0	0	0	0	0	0	0	0	0	0	0	0	0	0	0	0	0	0	0	0	0	0
1872	122977	1.051	75.17	71.52	0.995	15.05	15.13	1.116	19.63	17.59	1.078	19.12	17.73	1.015	21.38	21.07	1.1232	43.1051	2	2	2	0	0	0	0	0	0	0	0	0	0	0	0	0	0	0	0	0	0	0	0	0	0	0	0	0	0	0	0
1873	122982	0.993	60.65	61.09	0.868	13.04	15.02	0.933	12.97	13.9	1.041	16.58	15.93	1.112	18.05	16.24	1.1323	43.7612	2	2	2	0	0	0	0	0	0	0	0	0	0	0	0	0	0	0	0	0	0	0	0	0	0	0	0	0	0	0	0
1874	122988	0.964	55.97	58.04	0.861	11.18	12.98	0.9	13.04	14.49	1	15.86	15.86	1.08	15.88	14.71	1.1301	46.5746	2	2	2	0	0	0	0	0	0	0	0	0	0	0	0	0	0	0	0	0	0	0	0	0	0	0	0	0	0	0	0
1875	123002	1.108	75.92	68.53	1.03	14.94	14.51	1.153	17.94	15.56	1.1	19.41	17.65	1.135	23.62	20.81	1.1305	39.3125	2	2	2	0	0	0	0	0	0	0	0	0	0	0	0	0	0	0	0	0	0	0	0	0	0	0	0	0	0	0	0
1876	123021	0.866	46.28	53.46	0.859	11.09	12.92	0.81	10.25	12.66	0.89	12.39	13.92	0.898	12.54	13.96	1.135	47.9426	2	2	2	0	0	0	0	0	0	0	0	0	0	0	0	0	0	0	0	0	0	0	0	0	0	0	0	0	0	0	0
1877	123025	0.987	72.96	73.94	0.938	15.11	16.1	1.057	16.94	16.03	1.035	19.75	19.09	0.931	21.16	22.73	1.1493	42.8112	2	2	2	0	0	0	0	0	0	0	0	0	0	0	0	0	0	0	0	0	0	0	0	0	0	0	0	0	0	0	0
1878	123033	1.012	56.83	56.17	0.909	11.43	12.57	1.039	15.43	14.85	1.016	14.7	14.46	1.07	15.28	14.28	1.1291	50.0292	2	2	2	0	0	0	0	0	0	0	0	0	0	0	0	0	0	0	0	0	0	0	0	0	0	0	0	0	0	0	0
1879	123037	0.905	62.86	69.5	0.897	14.39	16.04	0.915	15.6	17.06	0.915	15.77	17.25	0.893	17.1	19.15	1.1298	44.8073	2	2	2	0	0	0	0	0	0	0	0	0	0	0	0	0	0	0	0	0	0	0	0	0	0	0	0	0	0	0	0
1880	123040	1.1	33.67	30.61	1.089	16.14	14.83	1.111	17.53	15.78	1.26	22.93	18.21	1.376	25.11	18.26	1.1524	42.2952	2	2	2	0	0	0	0	0	0	0	0	0	0	0	0	0	0	0	0	0	0	0	0	0	0	0	0	0	0	0	0
1881	123042	1	58.14	58.14	0.999	12.75	12.76	0.997	13.33	13.38	0.964	15.3	15.88	1.039	16.76	16.13	1.1324	45.9274	2	2	2	0	0	0	0	0	0	0	0	0	0	0	0	0	0	0	0	0	0	0	0	0	0	0	0	0	0	0	0
1882	123043	1.156	63.55	54.98	1.095	14.07	12.86	1.176	14.6	12.41	1.156	16.63	14.38	1.19	18.24	15.33	1.1528	41.0256	2	2	2	0	0	0	0	0	0	0	0	0	0	0	0	0	0	0	0	0	0	0	0	0	0	0	0	0	0	0	0
1883	123045	0.729	18.02	24.72	0.828	9.9	11.95	0.724	8.7	12.02	0.734	9.32	12.7	0.934	20.22	21.66	1.1346	40.4464	2	2	2	0	0	0	0	0	0	0	0	0	0	0	0	0	0	0	0	0	0	0	0	0	0	0	0	0	0	0	0
1884	123059	0.841	40.85	48.58	0.833	9.62	11.55	0.861	9.95	11.56	0.812	8.93	11	0.853	12.34	14.47	1.133	42.0318	2	2	1	0	0	1	0	0	0	0	0	0	0	0	0	0	0	0	0	0	0	0	0	0	0	0	0	0	0	0	0
1885	123069	0.478	10.19	21.31	0.679	7.18	10.57	0.682	5.37	7.88	0.467	4.76	10.19	0.488	5.43	11.12	1.1461	40.8258	1	2	2	1	0	0	65	2	1	0	0	0	0	0	0	0	0	0	0	0	0	0	0	0	0	0	0	0	0	0	0
1886	123070	1.065	70.46	66.14	0.975	14.77	15.15	1.039	16.46	15.84	1.118	18.8	16.82	1.115	20.43	18.33	1.13	45.7247	2	2	2	0	0	0	0	0	0	0	0	0	0	0	0	0	0	0	0	0	0	0	0	0	0	0	0	0	0	0	0
1887	123077	0.799	38.88	48.67	0.721	7.31	10.15	0.855	11.63	13.61	0.778	9.02	11.59	0.819	10.91	13.32	1.134	45.8385	2	2	2	0	0	0	0	0	0	0	0	0	0	0	0	0	0	0	0	0	0	0	0	0	0	0	0	0	0	0	0
1888	123084	1.236	77.13	62.4	1.155	16.55	14.33	1.242	18.13	14.6	1.296	19.64	15.16	1.245	22.81	18.32	1.1264	43.9844	2	2	2	0	0	0	0	0	0	0	0	0	0	0	0	0	0	0	0	0	0	0	0	0	0	0	0	0	0	0	0
1889	123085	1.478	104.21	70.5	1.51	25.12	16.64	1.557	24.8	15.93	1.469	27.55	18.75	1.394	26.73	19.17	1.1288	39.8074	2	2	2	0	0	0	0	0	0	0	0	0	0	0	0	0	0	0	0	0	0	0	0	0	0	0	0	0	0	0	0
1890	123088	0.752	35.49	47.2	0.769	8.56	11.12	0.693	6.97	10.05	0.787	9.88	12.56	0.749	10.08	13.47	1.1487	43.5608	2	2	2	0	0	0	0	0	0	0	0	0	0	0	0	0	0	0	0	0	0	0	0	0	0	0	0	0	0	0	0
1891	123089	0.852	48.92	57.42	0.774	9.57	12.36	0.817	10.35	12.67	0.946	15.05	15.91	0.846	13.94	16.48	1.1583	46.0213	2	2	2	0	0	0	0	0	0	0	0	0	0	0	0	0	0	0	0	0	0	0	0	0	0	0	0	0	0	0	0
1892	123090	1.171	69.97	59.74	1.206	15.92	13.2	1.18	16.37	13.88	1.196	18.63	15.57	1.115	19.05	17.09	1.1399	39.7978	2	2	2	0	0	0	0	0	0	0	0	0	0	0	0	0	0	0	0	0	0	0	0	0	0	0	0	0	0	0	0
1893	123104	1.409	73.63	52.27	1.39	21.57	15.51	1.423	25.74	18.09	1.41	26.33	18.68	1.565	32	20.45	1.1327	42.0034	2	2	2	0	0	0	0	0	0	0	0	0	0	0	0	0	0	0	0	0	0	0	0	0	0	0	0	0	0	0	0
1894	123128	1.047	76.52	73.06	1.028	17.83	17.35	1.023	16.97	16.59	1.052	19.54	18.57	1.079	22.18	20.55	1.13	43.2713	2	1	2	0	2	0	0	0	0	0	0	0	0	0	0	15	1	0	15	1	0	0	0	0	0	0	0	0	0	0	0
1895	123135	0.818	48.24	58.94	0.716	8.5	11.88	0.767	11.77	15.34	0.888	13.78	15.53	0.876	14.18	16.19	1.1475	43.0234	2	2	2	0	0	0	0	0	0	0	0	0	0	0	0	0	0	0	0	0	0	0	0	0	0	0	0	0	0	0	0
1896	123138	0.808	49.29	61.03	0.794	10.37	13.05	0.786	11.39	14.49	0.874	15.07	17.25	0.767	12.46	16.24	1.1573	46.1716	2	2	2	0	0	0	0	0	0	0	0	0	0	0	0	0	0	0	0	0	0	0	0	0	0	0	0	0	0	0	0
1897	123146	0.826	50.1	60.63	0.788	10.98	13.93	0.821	12.37	15.07	0.855	12.32	14.4	0.838	14.43	17.22	1.1341	49.2819	2	2	2	0	0	0	0	0	0	0	0	0	0	0	0	0	0	0	0	0	0	0	0	0	0	0	0	0	0	0	0
1898	123162	1.042	46.42	44.54	1.008	14.01	13.89	1.044	14.93	14.3	1.07	17.48	16.34	1.221	24.5	20.07	1.1282	43.5607	2	2	2	0	0	0	0	0	0	0	0	0	0	0	0	0	0	0	0	0	0	0	0	0	0	0	0	0	0	0	0
1899	123164	1.109	74.16	66.87	1.015	15	14.78	1.153	18.56	16.1	1.091	18.9	17.33	1.163	21.7	18.66	1.1342	49.5513	2	2	2	0	0	0	0	0	0	0	0	0	0	0	0	0	0	0	0	0	0	0	0	0	0	0	0	0	0	0	0
1900	123173	1.191	73.7	61.9	1.107	17.41	15.73	1.212	16.94	13.98	1.218	19.29	15.83	1.226	20.05	16.36	1.1392	41.7176	2	2	2	0	0	0	0	0	0	0	0	0	0	0	0	0	0	0	0	0	0	0	0	0	0	0	0	0	0	0	0
1901	123190	1.487	85.93	57.8	1.384	18.29	13.22	1.464	20.17	13.78	1.557	23.26	14.94	1.527	24.21	15.86	1.1333	43.7423	2	2	2	0	0	0	0	0	0	0	0	0	0	0	0	0	0	0	0	0	0	0	0	0	0	0	0	0	0	0	0
1902	123193	1.013	61.72	60.93	0.884	11.43	12.93	0.974	13.87	14.25	1.03	16.15	15.67	1.12	20.26	18.09	1.1344	46.6996	2	2	2	0	0	0	0	0	0	0	0	0	0	0	0	0	0	0	0	0	0	0	0	0	0	0	0	0	0	0	0
1903	123203	0.811	43.24	53.33	0.828	9.97	12.04	0.81	10.27	12.68	0.833	11.38	13.66	0.777	11.63	14.96	1.148	42.1866	2	2	2	0	0	0	0	0	0	0	0	0	0	0	0	0	0	0	0	0	0	0	0	0	0	0	0	0	0	0	0
1904	123215	1.087	74.56	68.61	1.057	16.19	15.33	1.086	18.88	17.38	1.155	20.66	17.89	1.046	18.83	18	1.1338	44.6682	2	2	2	0	0	0	0	0	0	0	0	0	0	0	0	0	0	0	0	0	0	0	0	0	0	0	0	0	0	0	0
1905	123231	1.191	92.63	77.77	1.203	21.74	18.08	1.167	21.76	18.64	1.237	24.93	20.15	1.158	24.2	20.9	1.1298	40.4607	2	2	2	0	0	0	0	0	0	0	0	0	0	0	0	0	0	0	0	0	0	0	0	0	0	0	0	0	0	0	0
1906	123235	0.972	25.94	26.7	0.864	9.95	11.52	1.041	12.41	11.92	1.23	16.09	13.08	1.053	15.99	15.18	1.1389	45.3953	2	2	2	0	0	0	0	0	0	0	0	0	0	0	0	0	0	0	0	0	0	0	0	0	0	0	0	0	0	0	0
1907	123247	1.061	68.88	64.92	0.987	14.92	15.11	1.109	18.15	16.36	1.119	17.77	15.88	1.027	18.04	17.56	1.1292	49.2028	2	1	2	0	1	0	0	0	0	0	0	0	0	0	0	45	1	0	0	0	0	0	0	0	0	0	0	0	0	0	0
1908	123254	1.063	68.85	64.79	1.005	14.37	14.3	1.091	16.27	14.92	1.073	18.03	16.79	1.075	20.18	18.77	1.1279	43.5085	2	2	2	0	0	0	0	0	0	0	0	0	0	0	0	0	0	0	0	0	0	0	0	0	0	0	0	0	0	0	0
1909	123261	1.264	61.84	48.93	1.247	12.6	10.11	1.279	16.84	13.17	1.231	15.67	12.73	1.295	16.73	12.92	1.1423	36.4785	2	2	2	0	0	0	0	0	0	0	0	0	0	0	0	0	0	0	0	0	0	0	0	0	0	0	0	0	0	0	0
1910	123264	0.943	52.51	55.71	0.906	10.98	12.12	0.925	12.59	13.61	0.964	14.29	14.82	0.967	14.66	15.16	1.1555	42.9176	2	2	2	0	0	0	0	0	0	0	0	0	0	0	0	0	0	0	0	0	0	0	0	0	0	0	0	0	0	0	0
1911	123268	0.997	55.92	56.08	0.93	10.71	11.53	0.929	12.26	13.19	1.062	15.48	14.58	1.041	17.47	16.78	1.1446	41.0555	2	2	2	0	0	0	0	0	0	0	0	0	0	0	0	0	0	0	0	0	0	0	0	0	0	0	0	0	0	0	0
1912	123271	1.085	60.01	55.3	0.966	12.91	13.37	1.066	13.12	12.31	1.09	14.92	13.69	1.196	19.06	15.93	1.1327	42.5146	2	2	2	0	0	0	0	0	0	0	0	0	0	0	0	0	0	0	0	0	0	0	0	0	0	0	0	0	0	0	0
1913	123277	1.196	79.86	66.77	1.128	15.95	14.13	1.189	19.25	16.19	1.192	21.83	18.32	1.26	22.83	18.13	1.1465	40.2705	2	2	2	0	0	0	0	0	0	0	0	0	0	0	0	0	0	0	0	0	0	0	0	0	0	0	0	0	0	0	0
1914	123278	1.147	85.34	74.4	1.123	18.08	16.1	1.14	18.76	16.46	1.136	23.42	20.61	1.181	25.08	21.23	1.133	44.2135	2	2	2	0	0	0	0	0	0	0	0	0	0	0	0	0	0	0	0	0	0	0	0	0	0	0	0	0	0	0	0
1915	123281	0.799	45.28	56.68	0.745	10.12	13.6	0.795	11.16	14.04	0.789	11.66	14.79	0.865	12.33	14.25	1.1344	45.2243	2	2	2	0	0	0	0	0	0	0	0	0	0	0	0	0	0	0	0	0	0	0	0	0	0	0	0	0	0	0	0
1916	123284	0.889	51.2	57.56	0.842	11.03	13.1	0.877	10.84	12.36	0.916	12.8	13.98	0.912	16.52	18.12	1.1194	44.3918	2	2	2	0	0	0	0	0	0	0	0	0	0	0	0	0	0	0	0	0	0	0	0	0	0	0	0	0	0	0	0
1917	123290	0.899	36.79	40.9	0.887	11.85	13.35	1.034	11.94	11.55	0.896	9.44	10.53	0.911	15.5	17.02	1.1476	37.6065	2	2	2	0	0	0	0	0	0	0	0	0	0	0	0	0	0	0	0	0	0	0	0	0	0	0	0	0	0	0	0
1918	123296	1.391	99.26	71.35	1.347	20.94	15.55	1.412	21.8	15.45	1.4	25.79	18.42	1.401	30.73	21.94	1.1339	38.0492	2	2	2	0	0	0	0	0	0	0	0	0	0	0	0	0	0	0	0	0	0	0	0	0	0	0	0	0	0	0	0
1919	123298	1.127	71.67	63.58	1.071	15.17	14.17	1.133	17.05	15.05	1.15	18.41	16	1.146	21.05	18.36	1.1333	40.4313	2	2	2	0	0	0	0	0	0	0	0	0	0	0	0	0	0	0	0	0	0	0	0	0	0	0	0	0	0	0	0
1920	123302	1.008	60.52	60.01	0.973	11.74	12.07	1.017	13.24	13.03	1.027	16.53	16.1	1.01	19	18.82	1.143	41.4323	2	2	2	0	0	0	0	0	0	0	0	0	0	0	0	0	0	0	0	0	0	0	0	0	0	0	0	0	0	0	0
1921	123310	1.18	60	50.83	1.109	13.49	12.16	1.201	14.15	11.78	1.175	15.64	13.3	1.232	16.73	13.58	1.1479	34.6706	2	1	2	0	5	0	0	0	0	0	0	0	0	0	0	22	1	0	25	1	0	99999	1	0	99999	1	0	52	2	3	0
1922	123317	1.002	50.95	50.87	0.988	12.55	12.7	0.98	10.91	11.13	0.979	13.07	13.35	1.054	14.42	13.68	1.1334	44.876	2	2	2	0	0	0	0	0	0	0	0	0	0	0	0	0	0	0	0	0	0	0	0	0	0	0	0	0	0	0	0
1923	123324	1.383	99.45	71.89	1.274	19.96	15.66	1.358	22.87	16.84	1.41	27.08	19.2	1.464	29.55	20.18	1.138	43.6835	2	2	2	0	0	0	0	0	0	0	0	0	0	0	0	0	0	0	0	0	0	0	0	0	0	0	0	0	0	0	0
1924	123327	1.356	100.6	74.19	1.248	21.46	17.2	1.322	21.1	15.96	1.388	28.07	20.23	1.441	29.97	20.8	1.1467	41.586	2	2	2	0	0	0	0	0	0	0	0	0	0	0	0	0	0	0	0	0	0	0	0	0	0	0	0	0	0	0	0
1925	123332	0.972	46.03	47.34	0.932	8.85	9.49	0.986	11.94	12.11	0.949	11.79	12.42	1.011	13.45	13.31	1.1526	40.2053	2	2	2	0	0	0	0	0	0	0	0	0	0	0	0	0	0	0	0	0	0	0	0	0	0	0	0	0	0	0	0
1926	123336	0.778	39.28	50.49	0.722	8.13	11.27	0.771	8.78	11.39	0.791	10.26	12.98	0.815	12.11	14.85	1.1583	44.8915	2	2	2	0	0	0	0	0	0	0	0	0	0	0	0	0	0	0	0	0	0	0	0	0	0	0	0	0	0	0	0
1927	123362	1.078	73.19	67.87	1.075	16.04	14.93	1.116	19.02	17.05	1.092	18.87	17.28	1.035	19.26	18.61	1.1425	40.7128	2	2	2	0	0	0	0	0	0	0	0	0	0	0	0	0	0	0	0	0	0	0	0	0	0	0	0	0	0	0	0
1928	123367	1.251	45.46	36.33	1.21	22.72	18.78	1.296	22.75	17.56	1.462	29.38	20.09	1.51	36.65	24.27	1.1472	38.3967	2	2	2	0	0	0	0	0	0	0	0	0	0	0	0	0	0	0	0	0	0	0	0	0	0	0	0	0	0	0	0
1929	123375	0.688	35.38	51.42	0.576	6.94	12.06	0.655	7.8	11.91	0.743	9.73	13.1	0.759	10.9	14.35	1.1566	44.2104	2	2	2	0	0	0	0	0	0	0	0	0	0	0	0	0	0	0	0	0	0	0	0	0	0	0	0	0	0	0	0
1930	123405	1.304	78.78	60.41	1.257	17.54	13.95	1.351	20.14	14.91	1.268	20.71	16.33	1.34	20.39	15.22	1.1308	44.7056	2	2	2	0	0	0	0	0	0	0	0	0	0	0	0	0	0	0	0	0	0	0	0	0	0	0	0	0	0	0	0
1931	123416	1.041	61.52	59.09	1.002	13.2	13.17	1.07	15.04	14.06	1.058	16.09	15.21	1.033	17.19	16.65	1.1263	45.4562	2	2	2	0	0	0	0	0	0	0	0	0	0	0	0	0	0	0	0	0	0	0	0	0	0	0	0	0	0	0	0
1932	123429	0.935	52.44	56.11	0.8	9.06	11.33	0.92	12.95	14.08	1.023	16.71	16.34	0.956	13.72	14.35	1.1308	49.25	2	2	2	0	0	0	0	0	0	0	0	0	0	0	0	0	0	0	0	0	0	0	0	0	0	0	0	0	0	0	0
1933	123434	0.987	59.75	60.52	0.954	12.3	12.9	1.004	15.03	14.97	1.006	15.99	15.89	0.981	16.44	16.76	1.1343	46.3045	2	2	2	0	0	0	0	0	0	0	0	0	0	0	0	0	0	0	0	0	0	0	0	0	0	0	0	0	0	0	0
1934	123484	0.836	40.83	48.82	0.772	8.45	10.95	0.789	8.21	10.41	0.86	11.27	13.1	0.898	12.9	14.36	1.1432	48.1476	2	2	2	0	0	0	0	0	0	0	0	0	0	0	0	0	0	0	0	0	0	0	0	0	0	0	0	0	0	0	0
1935	123488	0.957	52.21	54.55	0.897	7.63	8.5	0.993	14.41	14.51	0.964	14.41	14.95	0.95	15.76	16.59	1.1304	43.763	2	2	2	0	0	0	0	0	0	0	0	0	0	0	0	0	0	0	0	0	0	0	0	0	0	0	0	0	0	0	0
1936	123492	0.95	53.13	55.92	0.94	11.6	12.34	0.974	14.11	14.5	0.931	12.51	13.44	0.953	14.91	15.64	1.1456	38.6476	2	2	2	0	0	0	0	0	0	0	0	0	0	0	0	0	0	0	0	0	0	0	0	0	0	0	0	0	0	0	0
1937	123496	0.871	49.66	57.02	0.79	10.57	13.37	0.881	11.53	13.1	0.909	12.42	13.66	0.897	15.14	16.89	1.1371	44.4522	2	2	2	0	0	0	0	0	0	0	0	0	0	0	0	0	0	0	0	0	0	0	0	0	0	0	0	0	0	0	0
1938	123504	1.095	54.4	49.66	1.011	12.79	12.64	1.168	19.17	16.42	1.111	19.94	17.95	1.136	21.67	19.07	1.1307	42.4814	2	2	2	0	0	0	0	0	0	0	0	0	0	0	0	0	0	0	0	0	0	0	0	0	0	0	0	0	0	0	0
1939	123506	1.082	61.68	57.02	1.051	12.87	12.25	1.104	15.5	14.04	1.129	14.75	13.07	1.051	18.57	17.66	1.1361	44.85	2	2	2	0	0	0	0	0	0	0	0	0	0	0	0	0	0	0	0	0	0	0	0	0	0	0	0	0	0	0	0
1940	123521	0.993	59.17	59.61	0.925	12.43	13.44	1.002	16.4	16.37	0.954	14.65	15.36	1.087	15.69	14.44	1.1469	37.875	2	2	2	0	0	0	0	0	0	0	0	0	0	0	0	0	0	0	0	0	0	0	0	0	0	0	0	0	0	0	0
1941	123523	1.315	101.3	77.06	1.338	23.44	17.52	1.341	25.36	18.92	1.281	25.52	19.92	1.304	26.98	20.69	1.1079	44.0803	2	2	2	0	0	0	0	0	0	0	0	0	0	0	0	0	0	0	0	0	0	0	0	0	0	0	0	0	0	0	0
1942	123528	1.015	54.54	53.73	0.947	10.84	11.44	1.053	11.45	10.88	1.035	14.73	14.23	1.019	17.51	17.18	1.1288	44.5592	2	2	2	0	0	0	0	0	0	0	0	0	0	0	0	0	0	0	0	0	0	0	0	0	0	0	0	0	0	0	0
1943	123531	1.194	78.58	65.83	1.213	17.74	14.63	1.211	19	15.69	1.169	20.27	17.34	1.188	21.58	18.16	1.1255	43.9413	2	2	2	0	0	0	0	0	0	0	0	0	0	0	0	0	0	0	0	0	0	0	0	0	0	0	0	0	0	0	0
1944	123535	1.03	75.55	73.38	0.961	16.75	17.44	1.002	17.89	17.86	1.033	19.38	18.76	1.114	21.53	19.32	1.1514	38.3842	2	2	2	0	0	0	0	0	0	0	0	0	0	0	0	0	0	0	0	0	0	0	0	0	0	0	0	0	0	0	0
1945	123539	1.132	72.97	64.48	0.996	13.07	13.12	1.17	18.62	15.92	1.175	20.61	17.54	1.156	20.69	17.9	1.1196	42.094	2	2	2	0	0	0	0	0	0	0	0	0	0	0	0	0	0	0	0	0	0	0	0	0	0	0	0	0	0	0	0
1946	123549	0.944	62.74	66.5	0.926	13.47	14.54	0.971	14.86	15.31	0.911	16.51	18.12	0.966	17.91	18.53	1.1364	44.2422	2	1	2	0	1	0	0	0	0	0	0	0	0	0	0	12	1	0	0	0	0	0	0	0	0	0	0	0	0	0	0
1947	123568	1.145	65.55	57.23	1.073	13.27	12.37	1.184	15.12	12.78	1.205	17.66	14.66	1.118	19.49	17.43	1.1373	45.307	2	2	2	0	0	0	0	0	0	0	0	0	0	0	0	0	0	0	0	0	0	0	0	0	0	0	0	0	0	0	0
1948	123569	1.426	92.59	64.94	1.392	22.84	16.41	1.477	24.24	16.42	1.419	23.49	16.56	1.415	22.02	15.56	1.1367	43.7014	2	2	2	0	0	0	0	0	0	0	0	0	0	0	0	0	0	0	0	0	0	0	0	0	0	0	0	0	0	0	0
1949	123570	0.801	41.3	51.53	0.803	6.98	8.69	0.746	7.95	10.66	0.833	11.81	14.17	0.809	14.56	18	1.1554	45.0562	2	2	2	0	0	0	0	0	0	0	0	0	0	0	0	0	0	0	0	0	0	0	0	0	0	0	0	0	0	0	0
1950	123571	1.025	67.05	65.43	0.972	15.47	15.91	1.061	16.39	15.45	1.048	17.23	16.45	1.019	17.96	17.63	1.1492	41.7183	2	2	2	0	0	0	0	0	0	0	0	0	0	0	0	0	0	0	0	0	0	0	0	0	0	0	0	0	0	0	0
1951	123574	1.037	77.24	74.52	0.958	17.05	17.8	1.015	15.92	15.68	1.09	22.65	20.78	1.068	21.63	20.26	1.1246	48.0778	1	2	2	1	0	0	70	2	1	0	0	0	0	0	0	0	0	0	0	0	0	0	0	0	0	0	0	0	0	0	0
1952	123577	1.212	59.57	49.16	1.231	16.34	13.27	1.21	17.78	14.69	1.2	25.45	21.2	1.331	24.13	18.14	1.1295	38.7599	2	2	2	0	0	0	0	0	0	0	0	0	0	0	0	0	0	0	0	0	0	0	0	0	0	0	0	0	0	0	0
1953	123578	1.087	73.31	67.45	0.986	15.45	15.67	1.063	17.06	16.06	1.125	17.65	15.69	1.156	23.14	20.02	1.1333	43.767	2	2	2	0	0	0	0	0	0	0	0	0	0	0	0	0	0	0	0	0	0	0	0	0	0	0	0	0	0	0	0
1954	123582	1.049	58.2	55.49	0.879	10.77	12.26	1.096	14.84	13.54	1.165	15.89	13.64	1.04	16.69	16.05	1.1298	49.6588	2	2	2	0	0	0	0	0	0	0	0	0	0	0	0	0	0	0	0	0	0	0	0	0	0	0	0	0	0	0	0
1955	123583	1.054	68.99	65.43	0.987	14.17	14.36	1.054	16.06	15.24	1.084	18.48	17.06	1.08	20.28	18.78	1.1475	41.4016	2	2	2	0	0	0	0	0	0	0	0	0	0	0	0	0	0	0	0	0	0	0	0	0	0	0	0	0	0	0	0
1956	123607	0.816	46.57	57.06	0.737	9.3	12.62	0.826	11.27	13.65	0.874	13.51	15.46	0.816	12.5	15.32	1.1353	44.0912	2	2	2	0	0	0	0	0	0	0	0	0	0	0	0	0	0	0	0	0	0	0	0	0	0	0	0	0	0	0	0
1957	123619	0.861	56.76	65.96	0.823	12.41	15.08	0.859	13.8	16.07	0.856	14.11	16.49	0.898	16.44	18.32	1.127	44.2899	2	2	2	0	0	0	0	0	0	0	0	0	0	0	0	0	0	0	0	0	0	0	0	0	0	0	0	0	0	0	0
1958	123624	1.156	76.15	65.89	1.146	18.81	16.42	1.153	15.87	13.77	1.201	20.33	16.93	1.127	21.15	18.77	1.1569	39.3484	2	2	2	0	0	0	0	0	0	0	0	0	0	0	0	0	0	0	0	0	0	0	0	0	0	0	0	0	0	0	0
1959	123626	0.997	60.94	61.14	0.961	13.12	13.65	0.995	15.25	15.34	1.022	15.79	15.44	1.004	16.78	16.71	1.1433	41.251	2	2	2	0	0	0	0	0	0	0	0	0	0	0	0	0	0	0	0	0	0	0	0	0	0	0	0	0	0	0	0
1960	123638	1.06	46.9	44.22	1.035	13.65	13.19	1.083	15.12	13.96	1.062	18.13	17.07	1.181	17.79	15.06	1.1417	36.373	2	2	2	0	0	0	0	0	0	0	0	0	0	0	0	0	0	0	0	0	0	0	0	0	0	0	0	0	0	0	0
1961	123639	1.509	105.23	69.74	1.412	21.31	15.09	1.535	25.55	16.65	1.514	26.03	17.2	1.554	32.33	20.8	1.1427	37.1984	2	2	2	0	0	0	0	0	0	0	0	0	0	0	0	0	0	0	0	0	0	0	0	0	0	0	0	0	0	0	0
1962	123646	1.16	56.96	49.12	1.023	10.64	10.4	1.143	14.43	12.63	1.25	15.76	12.62	1.197	16.12	13.48	1.1547	42.8037	2	2	2	0	0	0	0	0	0	0	0	0	0	0	0	0	0	0	0	0	0	0	0	0	0	0	0	0	0	0	0
1963	123648	0.804	45.54	56.62	0.774	9.36	12.09	0.804	10.55	13.12	0.766	10.76	14.06	0.857	14.87	17.36	1.1363	43.9619	2	2	2	0	0	0	0	0	0	0	0	0	0	0	0	0	0	0	0	0	0	0	0	0	0	0	0	0	0	0	0
1964	123652	0.856	44.82	52.37	0.912	11.33	12.42	0.846	10.44	12.35	0.848	11.54	13.61	0.822	11.51	14	1.1335	45.3484	2	1	2	0	1	0	0	0	0	0	0	0	0	0	0	24	1	0	0	0	0	0	0	0	0	0	0	0	0	0	0
1965	123656	1.085	69.6	64.13	1.01	16.05	15.88	1.117	17.85	15.97	1.114	17.55	15.75	1.099	18.16	16.53	1.1486	38.9348	2	2	2	0	0	0	0	0	0	0	0	0	0	0	0	0	0	0	0	0	0	0	0	0	0	0	0	0	0	0	0
1966	123668	0.86	57.83	67.23	0.821	12.48	15.2	0.902	15.58	17.27	0.885	15.03	16.99	0.83	14.75	17.77	1.1393	43.9902	2	2	1	0	0	1	0	0	0	0	0	0	0	0	0	0	0	0	0	0	0	0	0	0	0	0	0	0	0	0	0
1967	123673	0.887	48.3	54.44	0.78	9.55	12.25	0.908	11.01	12.13	0.912	12.76	13.99	0.932	14.99	16.08	1.1349	46.7446	2	2	2	0	0	0	0	0	0	0	0	0	0	0	0	0	0	0	0	0	0	0	0	0	0	0	0	0	0	0	0
1968	123674	1.306	61.13	46.8	1.089	13.2	12.12	1.257	17.67	14.06	1.315	20.96	15.94	1.339	22.5	16.8	1.1305	40.4394	2	2	2	0	0	0	0	0	0	0	0	0	0	0	0	0	0	0	0	0	0	0	0	0	0	0	0	0	0	0	0
1969	123677	1.009	74.69	74.02	0.956	16.71	17.49	1.022	18.29	17.89	1.029	18.84	18.3	1.025	20.85	20.33	1.132	41.6258	2	2	2	0	0	0	0	0	0	0	0	0	0	0	0	0	0	0	0	0	0	0	0	0	0	0	0	0	0	0	0
1970	123689	1.014	54.68	53.94	0.966	10.51	10.88	0.927	11.83	12.76	1.043	15.85	15.19	1.092	16.5	15.1	1.1424	43.5351	2	2	2	0	0	0	0	0	0	0	0	0	0	0	0	0	0	0	0	0	0	0	0	0	0	0	0	0	0	0	0
1971	123705	0.926	45.76	49.44	0.813	8.69	10.7	0.929	11.53	12.41	0.941	12.14	12.89	0.997	13.4	13.44	1.1313	44.9355	1	2	2	1	0	0	59	2	3	0	0	0	0	0	0	0	0	0	0	0	0	0	0	0	0	0	0	0	0	0	0
1972	123709	0.895	47.41	52.99	0.783	9.95	12.71	0.895	12.27	13.71	0.933	13.5	14.46	0.967	11.7	12.11	1.1399	50.7024	2	2	2	0	0	0	0	0	0	0	0	0	0	0	0	0	0	0	0	0	0	0	0	0	0	0	0	0	0	0	0
1973	123711	1.055	59.56	56.44	0.895	12.27	13.71	1.038	14.88	14.33	1.148	16.83	14.66	1.135	15.59	13.73	1.1417	38.1619	2	2	2	0	0	0	0	0	0	0	0	0	0	0	0	0	0	0	0	0	0	0	0	0	0	0	0	0	0	0	0
1974	123713	1.056	53.49	50.67	0.98	10.94	11.17	1.089	12.91	11.85	1.137	15.18	13.35	1.012	14.46	14.3	1.1454	40.719	2	2	2	0	0	0	0	0	0	0	0	0	0	0	0	0	0	0	0	0	0	0	0	0	0	0	0	0	0	0	0
1975	123728	0.933	53.49	57.35	0.911	10.95	12.02	0.964	13.97	14.49	0.985	14.33	14.55	0.874	14.24	16.28	1.1324	48.8671	2	2	2	0	0	0	0	0	0	0	0	0	0	0	0	0	0	0	0	0	0	0	0	0	0	0	0	0	0	0	0
1976	123729	1.042	68.35	65.6	0.942	14.35	15.24	0.95	14.63	15.4	1.098	17.08	15.56	1.148	22.29	19.41	1.1249	40.0371	2	2	2	0	0	0	0	0	0	0	0	0	0	0	0	0	0	0	0	0	0	0	0	0	0	0	0	0	0	0	0
1977	123740	0.843	46.12	54.71	0.748	8.46	11.31	0.823	10.77	13.08	0.869	12.81	14.74	0.904	14.07	15.57	1.13	47.7477	2	1	2	0	1	0	0	0	0	0	0	0	0	0	0	50	2	1	0	0	0	0	0	0	0	0	0	0	0	0	0
1978	123754	1.108	73.87	66.7	0.998	13.81	13.83	1.117	17.18	15.39	1.106	20.39	18.44	1.181	22.49	19.04	1.1283	44.3186	2	2	2	0	0	0	0	0	0	0	0	0	0	0	0	0	0	0	0	0	0	0	0	0	0	0	0	0	0	0	0
1979	123767	0.717	35.82	49.99	0.62	7.6	12.24	0.678	8.52	12.56	0.766	9.35	12.21	0.798	10.36	12.97	1.145	41.9538	1	1	1	1	1	1	61	2	2	0	0	0	0	0	0	48	1	0	0	0	0	0	0	0	0	0	0	0	0	0	0
1980	123770	1.063	68.45	64.4	0.957	13.29	13.89	1.028	15.75	15.33	1.091	17.98	16.48	1.145	21.43	18.71	1.1373	48.5806	2	2	2	0	0	0	0	0	0	0	0	0	0	0	0	0	0	0	0	0	0	0	0	0	0	0	0	0	0	0	0
1981	123775	0.658	32.39	49.23	0.689	7.8	11.31	0.69	7.24	10.5	0.633	7.91	12.49	0.633	9.45	14.92	1.1293	45.1083	2	2	2	0	0	0	0	0	0	0	0	0	0	0	0	0	0	0	0	0	0	0	0	0	0	0	0	0	0	0	0
1982	123784	1.127	53.42	47.41	0.995	12.12	12.18	1.099	12.3	11.19	1.203	14.08	11.71	1.211	14.93	12.33	1.1564	43.466	2	2	2	0	0	0	0	0	0	0	0	0	0	0	0	0	0	0	0	0	0	0	0	0	0	0	0	0	0	0	0
1983	123787	1.142	83.76	73.33	1.123	18.69	16.64	1.174	20.66	17.6	1.174	22.42	19.09	1.1	22	19.99	1.1397	42.8023	2	2	2	0	0	0	0	0	0	0	0	0	0	0	0	0	0	0	0	0	0	0	0	0	0	0	0	0	0	0	0
1984	123798	0.822	51.05	62.1	0.777	10.7	13.76	0.852	13.25	15.55	0.866	14.02	16.18	0.788	13.09	16.61	1.1378	47.5579	2	2	2	0	0	0	0	0	0	0	0	0	0	0	0	0	0	0	0	0	0	0	0	0	0	0	0	0	0	0	0
1985	123801	0.919	55.96	60.87	0.818	11.68	14.28	0.893	12.7	14.23	0.985	15.39	15.63	0.967	16.18	16.73	1.1338	43.0999	2	2	2	0	0	0	0	0	0	0	0	0	0	0	0	0	0	0	0	0	0	0	0	0	0	0	0	0	0	0	0
1986	123802	1.298	91.16	70.21	1.239	19.42	15.68	1.331	22.22	16.7	1.299	23.26	17.91	1.318	26.27	19.93	1.1272	44.9292	2	2	2	0	0	0	0	0	0	0	0	0	0	0	0	0	0	0	0	0	0	0	0	0	0	0	0	0	0	0	0
1987	123808	1.027	50.9	49.57	1.028	11.05	10.75	1.026	12.54	12.22	0.997	12.58	12.63	1.054	14.73	13.97	1.1324	45.8476	2	2	2	0	0	0	0	0	0	0	0	0	0	0	0	0	0	0	0	0	0	0	0	0	0	0	0	0	0	0	0
1988	123815	0.84	42.63	50.78	0.8	9.05	11.31	0.816	9.03	11.07	0.858	11.21	13.07	0.871	13.34	15.33	1.155	44.85	2	2	2	0	0	0	0	0	0	0	0	0	0	0	0	0	0	0	0	0	0	0	0	0	0	0	0	0	0	0	0
1989	123834	1.029	65.39	63.57	0.955	13.78	14.43	1.064	15.99	15.02	1.036	17.5	16.9	1.052	18.12	17.23	1.1388	46.4074	2	2	2	0	0	0	0	0	0	0	0	0	0	0	0	0	0	0	0	0	0	0	0	0	0	0	0	0	0	0	0
1990	123845	0.952	44.83	47.09	0.858	12.94	15.08	0.986	14.53	14.74	1.122	17.23	15.36	1.005	17.36	17.27	1.1212	45.0032	2	2	2	0	0	0	0	0	0	0	0	0	0	0	0	0	0	0	0	0	0	0	0	0	0	0	0	0	0	0	0
1991	123852	0.864	49.48	57.25	0.817	10.89	13.33	0.84	11.79	14.04	0.885	12.83	14.5	0.909	13.97	15.38	1.1415	48.6549	2	2	2	0	0	0	0	0	0	0	0	0	0	0	0	0	0	0	0	0	0	0	0	0	0	0	0	0	0	0	0
1992	123853	1.153	101.81	88.33	1.129	22.26	19.72	1.146	23.76	20.74	1.142	27.06	23.7	1.189	28.73	24.17	1.1323	47.0301	2	1	2	0	1	0	0	0	0	0	0	0	0	0	0	6	1	0	0	0	0	0	0	0	0	0	0	0	0	0	0
1993	123854	1.295	80.47	62.15	1.232	18.38	14.92	1.235	17.79	14.4	1.327	20.2	15.22	1.369	24.09	17.6	1.1325	38.8067	2	2	2	0	0	0	0	0	0	0	0	0	0	0	0	0	0	0	0	0	0	0	0	0	0	0	0	0	0	0	0
1994	123859	0.95	56.28	59.24	0.864	12.23	14.15	0.963	13.15	13.66	1.013	15.24	15.05	0.956	15.66	16.38	1.1345	46.5448	2	2	2	0	0	0	0	0	0	0	0	0	0	0	0	0	0	0	0	0	0	0	0	0	0	0	0	0	0	0	0
1995	123867	0.973	50.17	51.54	0.941	12.38	13.15	1.025	12.01	11.72	0.98	13.55	13.83	0.953	12.23	12.84	1.1451	39.6618	2	1	2	0	1	0	0	0	0	0	0	0	0	0	0	38	1	0	0	0	0	0	0	0	0	0	0	0	0	0	0
1996	123868	0.995	60.9	61.19	0.981	14.3	14.58	1.008	14.41	14.29	0.965	14.85	15.4	1.025	17.34	16.91	1.136	46.3526	2	2	2	0	0	0	0	0	0	0	0	0	0	0	0	0	0	0	0	0	0	0	0	0	0	0	0	0	0	0	0
1997	123871	1.218	85.53	70.23	1.143	17.29	15.13	1.185	19.36	16.34	1.286	24.12	18.76	1.237	24.75	20.01	1.1341	42.8878	2	2	2	0	0	0	0	0	0	0	0	0	0	0	0	0	0	0	0	0	0	0	0	0	0	0	0	0	0	0	0
1998	123879	1.128	67.78	60.09	1.087	15.41	14.17	1.088	17.01	15.64	1.14	15.74	13.81	1.191	19.62	16.47	1.1367	43.0858	2	1	2	0	2	0	0	0	0	0	0	0	0	0	0	17	1	0	65	2	1	0	0	0	0	0	0	0	0	0	0
[truncated: 122 more rows]
[truncated: 65 more columns]
