# Supplementary material for: A comprehensive analysis and performance evaluation for osteoporosis prediction models
Source: PeerJ Comput Sci. 2024 Dec 4;10:e2338. doi: 10.7717/peerj-cs.2338 (PMC11784534; doi:10.7717/peerj-cs.2338)
Supplement: Supplemental Information 2 — Key variables include bone mineral density (BMD) and bone mineral content (BMC) at various femur sites, such as the femoral neck (DXXNKBMD, DXXNKBMC) and trochanter (DXXTRBMD, DXXTRBMC). The dataset also includes corresponding questionnaire responses covering various osteoporosis-related topics (e.g., OSQ150, OSQ160A, etc.) and an overall osteoporosis classification (Osteo_Class) based on the collected data. [file peerj-cs-10-2338-s002.xlsx]

## Sheet: Sheet1
	SEQN	DXXOFBMD	DXXOFBMC	DXXOFA	DXXNKBMD	DXXNKBMC	DXXNKA	DXXTRBMD	DXXTRBMC	DXXTRA	DXXINBMD	DXXINBMC	DXXINA	DXXWDBMD	DXXWDBMC	DXXWDA	DXAFMRK	DXAFMRD0	OSQ010A	OSQ010B	OSQ010C	OSQ020A	OSQ020B	OSQ020C	OSD030AA	OSQ040AA	OSD050AA	OSD030AB	OSQ040AB	OSD050AB	OSD030AC	OSQ040AC	OSD050AC	OSD030BA	OSQ040BA	OSD050BA	OSD030BB	OSQ040BB	OSD050BB	OSD030BC	OSQ040BC	OSD050BC	OSD030BD	OSQ040BD	OSD050BD	OSD030BE	OSQ040BE	OSD050BE	OSD030BF
0	109274	1.032	49.59	48.03	0.831	5.21	6.27	0.794	13.18	16.61	1.24	31.2	25.15	0.557	0.65	1.17	1.1432	44.1491	2	2	2	0	0	0	0	0	0	0	0	0	0	0	0	0	0	0	0	0	0	0	0	0	0	0	0	0	0	0	0
1	109282	0.807	29.98	37.16	0.661	3.56	5.38	0.646	8.65	13.39	0.967	17.78	18.39	0.435	0.45	1.04	1.1594	46.0592	2	1	1	0	3	1	0	0	0	0	0	0	0	0	0	20	1	0	48	1	0	52	2	1	0	0	0	0	0	0	0
2	109292	1.017	37.97	37.34	0.886	4.44	5.01	0.708	8.55	12.09	1.234	24.97	20.24	0.698	0.8	1.14	1.1286	50.617	2	2	2	0	0	0	0	0	0	0	0	0	0	0	0	0	0	0	0	0	0	0	0	0	0	0	0	0	0	0	0
3	109300	0.751	19.34	25.75	0.54	2.49	4.61	0.625	5.18	8.29	0.909	11.67	12.84	0.503	0.52	1.04	1.1632	46.6257	2	2	2	0	0	0	0	0	0	0	0	0	0	0	0	0	0	0	0	0	0	0	0	0	0	0	0	0	0	0	0
4	109305	0.95	32.81	34.55	0.736	4.3	5.84	0.674	7.11	10.54	1.178	21.41	18.17	0.427	0.45	1.04	1.1376	53.4603	2	2	2	0	0	0	0	0	0	0	0	0	0	0	0	0	0	0	0	0	0	0	0	0	0	0	0	0	0	0	0
5	109313	1.036	53.46	51.6	0.897	5.47	6.1	0.862	11.7	13.58	1.137	36.29	31.92	0.505	0.58	1.16	1.1331	49.7317	2	1	2	0	1	0	0	0	0	0	0	0	0	0	0	18	1	0	0	0	0	0	0	0	0	0	0	0	0	0	0
6	109316	0.75	24.34	32.47	0.699	3.35	4.8	0.491	4.93	10.04	0.911	16.06	17.63	0.367	0.38	1.03	1.1413	51.8491	2	2	2	0	0	0	0	0	0	0	0	0	0	0	0	0	0	0	0	0	0	0	0	0	0	0	0	0	0	0	0
7	109327	0.858	30.16	35.15	0.737	3.48	4.72	0.613	5.65	9.22	0.992	21.03	21.21	0.624	0.82	1.32	1.1493	46.2527	2	2	2	0	0	0	0	0	0	0	0	0	0	0	0	0	0	0	0	0	0	0	0	0	0	0	0	0	0	0	0
8	109330	0.944	35.85	37.98	0.79	4.06	5.14	0.691	8.78	12.71	1.143	23.01	20.13	0.604	0.7	1.15	1.1391	51.1089	2	2	2	0	0	0	0	0	0	0	0	0	0	0	0	0	0	0	0	0	0	0	0	0	0	0	0	0	0	0	0
9	109334	0.703	22.19	31.55	0.513	2.36	4.59	0.554	5.47	9.86	0.84	14.36	17.1	0.305	0.35	1.14	1.1339	50.6008	2	2	2	0	0	0	0	0	0	0	0	0	0	0	0	0	0	0	0	0	0	0	0	0	0	0	0	0	0	0	0
10	109335	0.834	27.57	33.06	0.777	3.86	4.97	0.602	6.27	10.42	0.987	17.43	17.67	0.489	0.63	1.3	1.1333	44.3777	2	1	2	0	1	0	0	0	0	0	0	0	0	0	0	20	1	0	0	0	0	0	0	0	0	0	0	0	0	0	0
11	109348	0.801	26.8	33.47	0.792	3.96	5	0.707	7.82	11.07	0.863	15.01	17.4	0.772	1.01	1.3	1.1401	55.3524	2	2	2	0	0	0	0	0	0	0	0	0	0	0	0	0	0	0	0	0	0	0	0	0	0	0	0	0	0	0	0
12	109350	0.957	40.55	42.39	0.83	4.73	5.7	0.727	9.73	13.38	1.119	26.1	23.32	0.643	0.75	1.16	1.1487	41.8578	2	2	2	0	0	0	0	0	0	0	0	0	0	0	0	0	0	0	0	0	0	0	0	0	0	0	0	0	0	0	0
13	109351	0.9	32.77	36.43	0.747	3.64	4.87	0.664	7.44	11.21	1.066	21.69	20.35	0.612	0.8	1.31	1.1379	50.3861	2	2	2	0	0	0	0	0	0	0	0	0	0	0	0	0	0	0	0	0	0	0	0	0	0	0	0	0	0	0	0
14	109367	1.046	50.12	47.91	0.897	5.03	5.6	0.801	11.76	14.69	1.207	33.33	27.62	0.556	0.6	1.07	1.1428	49.4011	2	2	2	0	0	0	0	0	0	0	0	0	0	0	0	0	0	0	0	0	0	0	0	0	0	0	0	0	0	0	0
15	109371	1.103	48.46	43.95	0.839	4.47	5.33	0.856	12.2	14.25	1.305	31.8	24.37	0.605	0.69	1.14	1.1507	45.4784	2	2	2	0	0	0	0	0	0	0	0	0	0	0	0	0	0	0	0	0	0	0	0	0	0	0	0	0	0	0	0
16	109389	0.984	40.65	41.33	0.743	4.29	5.77	0.711	9.23	12.98	1.202	27.14	22.58	0.506	0.58	1.15	1.1342	47.094	2	1	2	0	1	0	0	0	0	0	0	0	0	0	0	17	1	0	0	0	0	0	0	0	0	0	0	0	0	0	0
17	109392	0.713	25.32	35.5	0.555	3.1	5.59	0.502	6.51	12.97	0.927	15.72	16.95	0.327	0.34	1.04	1.1414	53.5786	2	2	2	0	0	0	0	0	0	0	0	0	0	0	0	0	0	0	0	0	0	0	0	0	0	0	0	0	0	0	0
18	109395	1.053	37.5	35.61	0.81	4.13	5.11	0.862	8.8	10.21	1.211	24.56	20.29	0.649	0.83	1.29	1.1562	46.3537	2	2	2	0	0	0	0	0	0	0	0	0	0	0	0	0	0	0	0	0	0	0	0	0	0	0	0	0	0	0	0
19	109408	1.312	56.66	43.19	0.905	5	5.53	0.985	12.67	12.85	1.572	39	24.8	0.719	0.82	1.14	1.1527	40.4857	2	2	2	0	0	0	0	0	0	0	0	0	0	0	0	0	0	0	0	0	0	0	0	0	0	0	0	0	0	0	0
20	109411	0.781	24.69	31.59	0.655	2.93	4.47	0.559	6.3	11.28	0.976	15.46	15.84	0.505	0.58	1.16	1.1571	48.9987	2	2	2	0	0	0	0	0	0	0	0	0	0	0	0	0	0	0	0	0	0	0	0	0	0	0	0	0	0	0	0
21	109413	0.77	24.6	31.95	0.583	2.7	4.64	0.598	6.06	10.14	0.922	15.83	17.17	0.502	0.65	1.3	1.1423	51.1401	2	2	2	0	0	0	0	0	0	0	0	0	0	0	0	0	0	0	0	0	0	0	0	0	0	0	0	0	0	0	0
22	109414	0.677	22.4	33.1	0.608	3	4.93	0.492	4.52	9.19	0.784	14.88	18.98	0.436	0.57	1.31	1.1386	53.1503	2	2	2	0	0	0	0	0	0	0	0	0	0	0	0	0	0	0	0	0	0	0	0	0	0	0	0	0	0	0	0
23	109415	1.12	35.26	31.48	0.914	4.5	4.93	0.819	7.34	8.97	1.332	23.42	17.59	0.662	0.77	1.17	1.1277	44.0754	2	2	2	0	0	0	0	0	0	0	0	0	0	0	0	0	0	0	0	0	0	0	0	0	0	0	0	0	0	0	0
24	109416	0.883	37.87	42.88	0.601	3.67	6.11	0.639	10.87	17.01	1.181	23.33	19.76	0.414	0.46	1.11	1.153	45.5691	2	2	2	0	0	0	0	0	0	0	0	0	0	0	0	0	0	0	0	0	0	0	0	0	0	0	0	0	0	0	0
25	109426	0.895	27.56	30.8	0.775	3.38	4.36	0.676	6.51	9.63	1.051	17.67	16.81	0.673	0.87	1.3	1.159	47.6143	2	2	2	0	0	0	0	0	0	0	0	0	0	0	0	0	0	0	0	0	0	0	0	0	0	0	0	0	0	0	0
26	109436	0.824	35.42	42.97	0.665	3.81	5.72	0.659	8.82	13.38	0.955	22.79	23.87	0.356	0.39	1.1	1.1369	51.7188	2	2	2	0	0	0	0	0	0	0	0	0	0	0	0	0	0	0	0	0	0	0	0	0	0	0	0	0	0	0	0
27	109439	0.952	30.33	31.86	0.807	4.1	5.08	0.672	6.17	9.18	1.14	20.06	17.6	0.598	0.69	1.16	1.1339	47.8671	2	2	2	0	0	0	0	0	0	0	0	0	0	0	0	0	0	0	0	0	0	0	0	0	0	0	0	0	0	0	0
28	109457	0.887	38.86	43.81	0.736	4.33	5.88	0.618	8.14	13.17	1.066	26.39	24.76	0.454	0.51	1.12	1.135	49.1335	2	1	2	0	1	0	0	0	0	0	0	0	0	0	0	8	1	0	0	0	0	0	0	0	0	0	0	0	0	0	0
29	109468	1.053	43.4	41.22	0.773	4.23	5.47	0.757	8.78	11.6	1.259	30.4	24.15	0.622	0.81	1.3	1.1307	44.7402	2	2	2	0	0	0	0	0	0	0	0	0	0	0	0	0	0	0	0	0	0	0	0	0	0	0	0	0	0	0	0
30	109474	0.689	23.1	33.52	0.647	3.41	5.28	0.527	5.85	11.09	0.807	13.84	17.16	0.404	0.44	1.1	1.1396	50.1426	2	2	2	0	0	0	0	0	0	0	0	0	0	0	0	0	0	0	0	0	0	0	0	0	0	0	0	0	0	0	0
31	109481	0.976	38.34	39.28	0.681	3.88	5.69	0.732	10.82	14.78	1.257	23.64	18.8	0.627	0.7	1.12	1.1568	46.9748	2	2	2	0	0	0	0	0	0	0	0	0	0	0	0	0	0	0	0	0	0	0	0	0	0	0	0	0	0	0	0
32	109483	0.988	38.86	39.33	0.835	4.59	5.5	0.719	9.58	13.32	1.204	24.7	20.51	0.711	0.92	1.3	1.1331	48.2348	2	2	2	0	0	0	0	0	0	0	0	0	0	0	0	0	0	0	0	0	0	0	0	0	0	0	0	0	0	0	0
33	109486	0.884	36.2	40.92	0.758	3.85	5.09	0.654	8.33	12.73	1.039	24.01	23.11	0.53	0.6	1.14	1.1543	44.8022	2	2	2	0	0	0	0	0	0	0	0	0	0	0	0	0	0	0	0	0	0	0	0	0	0	0	0	0	0	0	0
34	109495	1.119	47.49	42.44	0.98	5.96	6.08	0.87	10.81	12.42	1.284	30.72	23.93	0.919	1.19	1.3	1.128	45.9069	2	2	2	0	0	0	0	0	0	0	0	0	0	0	0	0	0	0	0	0	0	0	0	0	0	0	0	0	0	0	0
35	109496	1.065	50.69	47.6	0.786	4.64	5.91	0.803	10.6	13.19	1.244	35.44	28.49	0.643	0.85	1.32	1.1428	41.1651	2	1	2	0	1	0	0	0	0	0	0	0	0	0	0	11	1	0	0	0	0	0	0	0	0	0	0	0	0	0	0
36	109503	1.028	50.96	49.57	0.718	4.81	6.71	0.734	12.12	16.51	1.291	34.02	26.34	0.502	0.65	1.3	1.1365	51.7041	2	2	2	0	0	0	0	0	0	0	0	0	0	0	0	0	0	0	0	0	0	0	0	0	0	0	0	0	0	0	0
37	109504	1.108	53.77	48.52	1.02	6.37	6.24	0.777	9.7	12.49	1.266	37.7	29.79	0.66	0.76	1.15	1.1334	48.2535	2	1	2	0	1	0	0	0	0	0	0	0	0	0	0	15	1	0	0	0	0	0	0	0	0	0	0	0	0	0	0
38	109520	1.14	52.68	46.22	0.957	5.85	6.11	0.851	12.01	14.11	1.339	34.82	26	0.627	0.71	1.14	1.1498	44.5899	2	2	2	0	0	0	0	0	0	0	0	0	0	0	0	0	0	0	0	0	0	0	0	0	0	0	0	0	0	0	0
39	109523	0.812	30.63	37.75	0.675	3.49	5.17	0.625	7.04	11.26	0.943	20.11	21.33	0.507	0.66	1.3	1.1576	47.2383	2	2	2	0	0	0	0	0	0	0	0	0	0	0	0	0	0	0	0	0	0	0	0	0	0	0	0	0	0	0	0
40	109527	0.734	21.34	29.08	0.607	2.79	4.6	0.62	5.91	9.53	0.846	12.65	14.95	0.388	0.45	1.15	1.1472	52.2605	2	2	2	0	0	0	0	0	0	0	0	0	0	0	0	0	0	0	0	0	0	0	0	0	0	0	0	0	0	0	0
41	109532	0.928	37.85	40.8	0.75	3.59	4.79	0.755	10.56	14	1.077	23.7	22.01	0.545	0.71	1.3	1.1373	49.3861	2	2	2	0	0	0	0	0	0	0	0	0	0	0	0	0	0	0	0	0	0	0	0	0	0	0	0	0	0	0	0
42	109538	0.824	28.2	34.24	0.702	3.51	5	0.623	6.91	11.1	0.98	17.79	18.15	0.505	0.52	1.04	1.1365	49.0574	2	2	2	0	0	0	0	0	0	0	0	0	0	0	0	0	0	0	0	0	0	0	0	0	0	0	0	0	0	0	0
43	109550	0.997	35.22	35.34	0.94	4.71	5.01	0.738	9.21	12.47	1.193	21.3	17.85	0.672	0.79	1.17	1.1457	43.2897	2	2	2	0	0	0	0	0	0	0	0	0	0	0	0	0	0	0	0	0	0	0	0	0	0	0	0	0	0	0	0
44	109551	0.878	33.95	38.65	0.769	3.86	5.01	0.68	8.02	11.79	1.01	22.08	21.85	0.56	0.65	1.15	1.1519	45.8262	2	2	2	0	0	0	0	0	0	0	0	0	0	0	0	0	0	0	0	0	0	0	0	0	0	0	0	0	0	0	0
45	109552	0.844	34.74	41.18	0.665	3.99	6	0.593	7.35	12.39	1.027	23.39	22.79	0.342	0.39	1.14	1.1283	45.7404	2	2	2	0	0	0	0	0	0	0	0	0	0	0	0	0	0	0	0	0	0	0	0	0	0	0	0	0	0	0	0
46	109558	1.074	49.78	46.34	0.891	5.36	6.01	0.802	11.37	14.18	1.264	33.05	26.15	0.649	0.79	1.22	1.1412	49.7483	2	2	2	0	0	0	0	0	0	0	0	0	0	0	0	0	0	0	0	0	0	0	0	0	0	0	0	0	0	0	0
47	109565	1.086	46.22	42.55	0.918	5.33	5.8	0.872	13.29	15.24	1.283	27.6	21.51	0.805	1.05	1.3	1.138	51.7876	2	2	2	0	0	0	0	0	0	0	0	0	0	0	0	0	0	0	0	0	0	0	0	0	0	0	0	0	0	0	0
48	109570	0.838	31.94	38.11	0.706	3.78	5.35	0.556	6.74	12.11	1.037	21.42	20.66	0.433	0.51	1.19	1.1377	48.4606	2	2	2	0	0	0	0	0	0	0	0	0	0	0	0	0	0	0	0	0	0	0	0	0	0	0	0	0	0	0	0
49	109574	0.787	23.64	30.03	0.625	3.05	4.88	0.648	6.52	10.06	0.932	14.07	15.09	0.518	0.63	1.22	1.1391	48.934	2	2	2	0	0	0	0	0	0	0	0	0	0	0	0	0	0	0	0	0	0	0	0	0	0	0	0	0	0	0	0
50	109577	0.955	29.6	28.74	1.266	5.7	4.5	0.646	6.22	9.63	1.21	17.68	14.6	0.895	0.94	1.05	1.1425	42.4863	2	2	2	0	0	0	0	0	0	0	0	0	0	0	0	0	0	0	0	0	0	0	0	0	0	0	0	0	0	0	0
51	109587	0.876	30.53	34.83	0.645	3.28	5.09	0.674	6.93	10.29	1.044	20.31	19.45	0.462	0.57	1.22	1.1354	52.3017	2	2	2	0	0	0	0	0	0	0	0	0	0	0	0	0	0	0	0	0	0	0	0	0	0	0	0	0	0	0	0
52	109588	0.874	40.39	46.2	0.797	4.88	6.12	0.645	9.26	14.36	1.021	26.26	25.72	0.519	0.6	1.15	1.1444	51.3305	2	2	2	0	0	0	0	0	0	0	0	0	0	0	0	0	0	0	0	0	0	0	0	0	0	0	0	0	0	0	0
53	109591	0.908	36.08	39.75	0.713	3.77	5.29	0.638	6.96	10.92	1.077	25.35	23.55	0.572	0.74	1.3	1.1371	47.4261	2	2	2	0	0	0	0	0	0	0	0	0	0	0	0	0	0	0	0	0	0	0	0	0	0	0	0	0	0	0	0
54	109593	0.966	41.72	43.18	0.796	4.21	5.29	0.738	9.05	12.26	1.111	28.46	25.63	0.641	0.82	1.29	1.1364	48.2888	2	2	2	0	0	0	0	0	0	0	0	0	0	0	0	0	0	0	0	0	0	0	0	0	0	0	0	0	0	0	0
55	109594	0.72	37.45	52.05	0.573	3.64	6.36	0.558	9.43	16.92	0.847	24.38	28.77	0.273	0.32	1.17	1.1376	50.2839	2	2	2	0	0	0	0	0	0	0	0	0	0	0	0	0	0	0	0	0	0	0	0	0	0	0	0	0	0	0	0
56	109597	0.849	22.18	26.13	0.733	2.94	4.01	0.626	5.43	8.67	1.027	13.82	13.45	0.468	0.55	1.17	1.1447	52.1659	2	2	2	0	0	0	0	0	0	0	0	0	0	0	0	0	0	0	0	0	0	0	0	0	0	0	0	0	0	0	0
57	109607	1.187	44.27	37.3	0.982	4.84	4.93	0.874	10.99	12.57	1.437	28.44	19.79	0.824	0.98	1.19	1.146	45.5895	2	2	2	0	0	0	0	0	0	0	0	0	0	0	0	0	0	0	0	0	0	0	0	0	0	0	0	0	0	0	0
58	109608	0.747	25.82	34.58	0.636	3.35	5.27	0.552	6.29	11.4	0.904	16.18	17.9	0.462	0.52	1.13	1.1511	46.7745	2	2	2	0	0	0	0	0	0	0	0	0	0	0	0	0	0	0	0	0	0	0	0	0	0	0	0	0	0	0	0
59	109610	0.883	46.43	52.55	0.7	4.42	6.32	0.587	9.3	15.83	1.076	32.71	30.4	0.396	0.46	1.17	1.138	46.8667	2	2	2	0	0	0	0	0	0	0	0	0	0	0	0	0	0	0	0	0	0	0	0	0	0	0	0	0	0	0	0
60	109611	1.059	39.12	36.94	0.937	4.37	4.66	0.761	9.53	12.52	1.277	25.22	19.75	0.608	0.71	1.17	1.138	49.7085	2	2	2	0	0	0	0	0	0	0	0	0	0	0	0	0	0	0	0	0	0	0	0	0	0	0	0	0	0	0	0
61	109612	1.341	50.36	37.55	1.4	6.11	4.36	1.005	12.09	12.03	1.52	32.16	21.16	1.261	1.64	1.3	1.136	48.6333	2	2	2	0	0	0	0	0	0	0	0	0	0	0	0	0	0	0	0	0	0	0	0	0	0	0	0	0	0	0	0
62	109614	0.953	45.34	47.55	0.76	4.69	6.18	0.795	10.6	13.33	1.072	30.05	28.04	0.322	0.37	1.14	1.1327	50.1733	2	1	2	0	1	0	0	0	0	0	0	0	0	0	0	17	1	0	0	0	0	0	0	0	0	0	0	0	0	0	0
63	109615	0.977	36.01	36.86	0.815	4.09	5.02	0.678	7.65	11.29	1.181	24.28	20.55	0.551	0.65	1.18	1.1387	47.865	2	2	2	0	0	0	0	0	0	0	0	0	0	0	0	0	0	0	0	0	0	0	0	0	0	0	0	0	0	0	0
64	109617	0.851	31.22	36.7	0.627	3.35	5.34	0.691	8.7	12.59	1.022	19.17	18.76	0.422	0.49	1.15	1.1421	50.1505	2	2	2	0	0	0	0	0	0	0	0	0	0	0	0	0	0	0	0	0	0	0	0	0	0	0	0	0	0	0	0
65	109620	1.156	34.73	30.05	0.938	4.58	4.88	0.88	7.95	9.03	1.377	22.2	16.13	0.844	0.99	1.17	1.1434	45.2001	2	2	2	0	0	0	0	0	0	0	0	0	0	0	0	0	0	0	0	0	0	0	0	0	0	0	0	0	0	0	0
66	109626	1.113	41.28	37.1	0.894	4.43	4.96	0.837	10.4	12.42	1.341	26.45	19.72	0.634	0.73	1.16	1.133	46.3823	2	2	2	0	0	0	0	0	0	0	0	0	0	0	0	0	0	0	0	0	0	0	0	0	0	0	0	0	0	0	0
67	109630	0.919	30.4	33.1	0.789	3.72	4.72	0.767	7.79	10.16	1.037	18.89	18.22	0.598	0.79	1.32	1.1469	43.2243	2	2	2	0	0	0	0	0	0	0	0	0	0	0	0	0	0	0	0	0	0	0	0	0	0	0	0	0	0	0	0
68	109634	0.76	23.68	31.15	0.634	2.9	4.58	0.628	5.41	8.62	0.856	15.36	17.95	0.481	0.55	1.13	1.1514	47.5938	2	2	2	0	0	0	0	0	0	0	0	0	0	0	0	0	0	0	0	0	0	0	0	0	0	0	0	0	0	0	0
69	109643	0.713	27.09	38	0.637	3.14	4.93	0.549	7.24	13.18	0.84	16.71	19.88	0.363	0.38	1.04	1.1426	48.599	2	2	1	0	0	1	0	0	0	0	0	0	0	0	0	0	0	0	0	0	0	0	0	0	0	0	0	0	0	0	0
70	109645	0.667	21.36	32.03	0.529	2.43	4.59	0.477	5.53	11.61	0.847	13.4	15.83	0.352	0.39	1.12	1.1392	50.6431	2	2	2	0	0	0	0	0	0	0	0	0	0	0	0	0	0	0	0	0	0	0	0	0	0	0	0	0	0	0	0
71	109649	0.914	36.42	39.87	0.673	3.67	5.46	0.669	7.04	10.53	1.077	25.71	23.88	0.542	0.71	1.3	1.1379	51.4439	2	2	2	0	0	0	0	0	0	0	0	0	0	0	0	0	0	0	0	0	0	0	0	0	0	0	0	0	0	0	0
72	109652	0.704	24.14	34.3	0.588	2.78	4.72	0.493	4.53	9.21	0.826	16.83	20.37	0.432	0.56	1.3	1.1365	53.2839	2	2	2	0	0	0	0	0	0	0	0	0	0	0	0	0	0	0	0	0	0	0	0	0	0	0	0	0	0	0	0
73	109656	0.993	34.11	34.36	0.798	3.79	4.74	0.808	9.05	11.2	1.155	21.27	18.42	0.693	0.9	1.3	1.1524	44.4641	2	1	2	0	1	0	0	0	0	0	0	0	0	0	0	8	1	0	0	0	0	0	0	0	0	0	0	0	0	0	0
74	109667	1.038	42.27	40.71	0.757	3.96	5.23	0.765	10.16	13.28	1.268	28.15	22.2	0.523	0.62	1.18	1.1404	51.8658	2	2	2	0	0	0	0	0	0	0	0	0	0	0	0	0	0	0	0	0	0	0	0	0	0	0	0	0	0	0	0
75	109675	0.929	27.65	29.76	0.816	3.67	4.5	0.761	7.68	10.09	1.075	16.3	15.17	0.726	0.84	1.16	1.1584	47.5529	2	2	2	0	0	0	0	0	0	0	0	0	0	0	0	0	0	0	0	0	0	0	0	0	0	0	0	0	0	0	0
76	109676	0.752	25.91	34.46	0.543	2.86	5.27	0.565	5.93	10.5	0.916	17.12	18.7	0.386	0.45	1.17	1.1381	49.0129	2	2	2	0	0	0	0	0	0	0	0	0	0	0	0	0	0	0	0	0	0	0	0	0	0	0	0	0	0	0	0
77	109686	1.016	36.07	35.5	0.753	3.97	5.27	0.811	9.89	12.19	1.231	22.21	18.04	0.513	0.53	1.04	1.1536	45.4581	2	2	2	0	0	0	0	0	0	0	0	0	0	0	0	0	0	0	0	0	0	0	0	0	0	0	0	0	0	0	0
78	109721	1.09	47.23	43.34	0.843	4.82	5.72	0.818	9.39	11.48	1.263	33.02	26.14	0.532	0.62	1.16	1.13	49.0736	2	2	2	0	0	0	0	0	0	0	0	0	0	0	0	0	0	0	0	0	0	0	0	0	0	0	0	0	0	0	0
79	109725	0.808	25.37	31.39	0.637	2.9	4.54	0.611	5.65	9.25	0.956	16.82	17.6	0.379	0.44	1.16	1.1379	49.4415	2	2	2	0	0	0	0	0	0	0	0	0	0	0	0	0	0	0	0	0	0	0	0	0	0	0	0	0	0	0	0
80	109739	0.886	46.87	52.88	0.887	5.73	6.46	0.686	9.64	14.05	0.973	31.51	32.37	0.305	0.35	1.14	1.1334	48.989	2	2	2	0	0	0	0	0	0	0	0	0	0	0	0	0	0	0	0	0	0	0	0	0	0	0	0	0	0	0	0
81	109743	0.996	40.73	40.89	0.819	4.47	5.46	0.823	9.6	11.67	1.122	26.66	23.77	0.567	0.63	1.12	1.1486	43.0175	2	2	2	0	0	0	0	0	0	0	0	0	0	0	0	0	0	0	0	0	0	0	0	0	0	0	0	0	0	0	0
82	109747	0.793	30.28	38.2	0.586	2.94	5.02	0.557	7.89	14.16	1.023	19.46	19.03	0.367	0.42	1.14	1.135	45.7506	2	2	1	0	0	1	0	0	0	0	0	0	0	0	0	0	0	0	0	0	0	0	0	0	0	0	0	0	0	0	0
83	109760	0.851	31.78	37.33	0.753	4.15	5.51	0.642	7.74	12.06	1.007	19.9	19.76	0.489	0.53	1.08	1.1327	49.0771	2	2	2	0	0	0	0	0	0	0	0	0	0	0	0	0	0	0	0	0	0	0	0	0	0	0	0	0	0	0	0
84	109763	1.138	53.3	46.83	0.88	5.19	5.9	0.874	14.79	16.94	1.389	33.31	23.99	0.664	0.69	1.04	1.1335	51.646	2	2	2	0	0	0	0	0	0	0	0	0	0	0	0	0	0	0	0	0	0	0	0	0	0	0	0	0	0	0	0
85	109764	1.136	45.91	40.41	0.901	4.61	5.12	0.917	11.43	12.47	1.309	29.88	22.82	0.613	0.7	1.14	1.159	46.4321	2	2	2	0	0	0	0	0	0	0	0	0	0	0	0	0	0	0	0	0	0	0	0	0	0	0	0	0	0	0	0
86	109765	1.009	28.9	28.63	0.853	3.48	4.08	0.782	6.56	8.39	1.167	18.85	16.16	0.736	0.95	1.29	1.157	47.7124	2	2	2	0	0	0	0	0	0	0	0	0	0	0	0	0	0	0	0	0	0	0	0	0	0	0	0	0	0	0	0
87	109771	0.711	26.6	37.43	0.664	3.43	5.17	0.46	5.13	11.15	0.854	18.03	21.11	0.463	0.48	1.04	1.1325	50.1198	2	2	2	0	0	0	0	0	0	0	0	0	0	0	0	0	0	0	0	0	0	0	0	0	0	0	0	0	0	0	0
88	109774	0.824	26.24	31.85	0.636	3.02	4.76	0.627	6.07	9.69	0.985	17.14	17.4	0.454	0.5	1.1	1.1463	52.8335	2	2	2	0	0	0	0	0	0	0	0	0	0	0	0	0	0	0	0	0	0	0	0	0	0	0	0	0	0	0	0
89	109780	1.095	44.72	40.85	0.943	5.42	5.75	0.732	9.67	13.21	1.353	29.63	21.89	0.865	1.14	1.31	1.1392	46.3434	2	1	2	0	1	0	0	0	0	0	0	0	0	0	0	63	2	2	0	0	0	0	0	0	0	0	0	0	0	0	0
90	109782	0.736	21.8	29.64	0.582	2.51	4.32	0.546	4.8	8.79	0.876	14.49	16.53	0.397	0.52	1.32	1.1522	46.9691	2	2	2	0	0	0	0	0	0	0	0	0	0	0	0	0	0	0	0	0	0	0	0	0	0	0	0	0	0	0	0
91	109783	1.059	35.4	33.43	0.865	3.36	3.89	0.785	7.35	9.37	1.224	24.69	20.17	0.641	0.74	1.16	1.1517	44.8546	2	2	2	0	0	0	0	0	0	0	0	0	0	0	0	0	0	0	0	0	0	0	0	0	0	0	0	0	0	0	0
92	109793	0.734	26.8	36.53	0.654	3.44	5.26	0.633	6.66	10.52	0.805	16.69	20.74	0.475	0.49	1.04	1.1386	52.1256	2	2	2	0	0	0	0	0	0	0	0	0	0	0	0	0	0	0	0	0	0	0	0	0	0	0	0	0	0	0	0
93	109794	1.016	44.99	44.28	0.879	5.21	5.93	0.868	12.07	13.9	1.133	27.71	24.45	0.535	0.62	1.15	1.1427	42.7228	2	1	2	0	1	0	0	0	0	0	0	0	0	0	0	16	1	0	0	0	0	0	0	0	0	0	0	0	0	0	0
94	109811	0.787	28.24	35.89	0.711	3.6	5.07	0.63	7.4	11.75	0.904	17.24	19.08	0.464	0.52	1.12	1.1572	45.8523	2	2	2	0	0	0	0	0	0	0	0	0	0	0	0	0	0	0	0	0	0	0	0	0	0	0	0	0	0	0	0
95	109812	0.7	19.8	28.31	0.574	1.94	3.39	0.541	4.83	8.93	0.815	13.03	15.99	0.451	0.47	1.04	1.1349	52.5726	2	2	2	0	0	0	0	0	0	0	0	0	0	0	0	0	0	0	0	0	0	0	0	0	0	0	0	0	0	0	0
96	109816	0.681	21.3	31.28	0.561	2.66	4.75	0.506	7.24	14.32	0.933	11.39	12.2	0.43	0.44	1.04	1.1361	50.8956	2	2	2	0	0	0	0	0	0	0	0	0	0	0	0	0	0	0	0	0	0	0	0	0	0	0	0	0	0	0	0
97	109823	0.87	27.04	31.08	0.7	2.88	4.11	0.703	7.22	10.27	1.014	16.94	16.7	0.481	0.56	1.16	1.137	53.6414	2	2	2	0	0	0	0	0	0	0	0	0	0	0	0	0	0	0	0	0	0	0	0	0	0	0	0	0	0	0	0
98	109831	0.775	29.53	38.1	0.569	3.04	5.35	0.632	6.72	10.62	0.893	19.77	22.13	0.429	0.56	1.3	1.1546	45.2506	2	2	2	0	0	0	0	0	0	0	0	0	0	0	0	0	0	0	0	0	0	0	0	0	0	0	0	0	0	0	0
99	109845	0.889	32.38	36.42	0.857	3.7	4.32	0.558	6.54	11.72	1.086	22.13	20.37	0.579	0.75	1.3	1.1314	45.8164	2	1	2	0	1	0	0	0	0	0	0	0	0	0	0	40	1	0	0	0	0	0	0	0	0	0	0	0	0	0	0
100	109850	0.988	35.9	36.33	0.816	4.35	5.33	0.709	7.5	10.58	1.178	24.05	20.42	0.646	0.74	1.15	1.1576	46.3106	2	2	2	0	0	0	0	0	0	0	0	0	0	0	0	0	0	0	0	0	0	0	0	0	0	0	0	0	0	0	0
101	109854	0.859	37.16	43.27	0.653	3.7	5.67	0.618	10.52	17.01	1.115	22.95	20.59	0.428	0.44	1.04	1.1482	52.5467	2	2	2	0	0	0	0	0	0	0	0	0	0	0	0	0	0	0	0	0	0	0	0	0	0	0	0	0	0	0	0
102	109856	0.857	28.53	33.3	0.723	3.54	4.89	0.603	5.87	9.73	1.024	19.12	18.67	0.548	0.71	1.3	1.1376	50.4719	2	2	2	0	0	0	0	0	0	0	0	0	0	0	0	0	0	0	0	0	0	0	0	0	0	0	0	0	0	0	0
103	109857	0.629	29.34	46.64	0.465	3.1	6.67	0.488	6.65	13.63	0.744	19.58	26.34	0.284	0.37	1.32	1.1496	43.4517	2	1	2	0	2	0	0	0	0	0	0	0	0	0	0	16	1	0	55	2	3	0	0	0	0	0	0	0	0	0	0
104	109864	0.833	29	34.84	0.766	3.63	4.75	0.609	6.86	11.26	0.983	18.51	18.83	0.574	0.64	1.11	1.1357	52.617	2	2	2	0	0	0	0	0	0	0	0	0	0	0	0	0	0	0	0	0	0	0	0	0	0	0	0	0	0	0	0
105	109867	0.896	44.14	49.26	0.695	3.9	5.6	0.663	9.68	14.6	1.052	30.56	29.05	0.443	0.52	1.17	1.1357	48.7362	2	2	2	0	0	0	0	0	0	0	0	0	0	0	0	0	0	0	0	0	0	0	0	0	0	0	0	0	0	0	0
106	109869	0.95	45.84	48.24	0.659	3.81	5.78	0.742	11.79	15.9	1.138	30.23	26.57	0.42	0.49	1.17	1.1432	50.323	2	2	2	0	0	0	0	0	0	0	0	0	0	0	0	0	0	0	0	0	0	0	0	0	0	0	0	0	0	0	0
107	109874	0.864	45.79	53	0.685	3.95	5.77	0.586	8.94	15.26	1.029	32.9	31.98	0.493	0.59	1.2	1.1544	44.9036	2	1	2	0	1	0	0	0	0	0	0	0	0	0	0	24	1	0	0	0	0	0	0	0	0	0	0	0	0	0	0
108	109879	0.903	30.44	33.7	0.829	3.37	4.06	0.689	6.72	9.76	1.024	20.35	19.88	0.658	0.86	1.3	1.1386	51.7661	2	2	2	0	0	0	0	0	0	0	0	0	0	0	0	0	0	0	0	0	0	0	0	0	0	0	0	0	0	0	0
109	109886	0.997	40.78	40.9	0.719	3.75	5.21	0.652	7.28	11.16	1.213	29.75	24.53	0.549	0.64	1.17	1.1297	43.2885	2	1	2	0	2	0	0	0	0	0	0	0	0	0	0	25	1	0	39	1	0	0	0	0	0	0	0	0	0	0	0
110	109897	0.783	31.45	40.14	0.706	3.44	4.87	0.489	6.11	12.49	0.962	21.9	22.78	0.377	0.45	1.18	1.1285	50.1911	2	2	2	0	0	0	0	0	0	0	0	0	0	0	0	0	0	0	0	0	0	0	0	0	0	0	0	0	0	0	0
111	109901	1.006	50.71	50.41	0.752	4.43	5.89	0.756	12.04	15.93	1.197	34.23	28.59	0.445	0.5	1.13	1.1502	45.7389	2	2	1	0	0	2	0	0	0	0	0	0	0	0	0	0	0	0	0	0	0	0	0	0	0	0	0	0	0	0	0
112	109902	0.921	29.28	31.81	0.878	4.09	4.66	0.586	5.96	10.18	1.133	19.23	16.97	0.653	0.78	1.19	1.1343	48.9368	2	2	2	0	0	0	0	0	0	0	0	0	0	0	0	0	0	0	0	0	0	0	0	0	0	0	0	0	0	0	0
113	109903	1.08	59.9	55.45	0.956	5.08	5.32	0.883	12.38	14.03	1.175	42.44	36.11	0.551	0.63	1.14	1.1261	45.3642	2	2	2	0	0	0	0	0	0	0	0	0	0	0	0	0	0	0	0	0	0	0	0	0	0	0	0	0	0	0	0
114	109908	0.604	26.66	44.11	0.545	3.19	5.86	0.47	7.24	15.41	0.711	16.23	22.84	0.32	0.38	1.17	1.1525	47.763	2	2	1	0	0	1	0	0	0	0	0	0	0	0	0	0	0	0	0	0	0	0	0	0	0	0	0	0	0	0	0
115	109915	0.987	47.33	47.97	0.827	4.79	5.79	0.721	11.52	15.97	1.184	31.03	26.21	0.453	0.51	1.12	1.1554	44.5864	2	2	2	0	0	0	0	0	0	0	0	0	0	0	0	0	0	0	0	0	0	0	0	0	0	0	0	0	0	0	0
116	109917	0.755	28	37.08	0.572	2.93	5.13	0.563	6.65	11.81	0.914	18.41	20.15	0.438	0.46	1.04	1.1385	51.9339	2	2	2	0	0	0	0	0	0	0	0	0	0	0	0	0	0	0	0	0	0	0	0	0	0	0	0	0	0	0	0
117	109918	1.103	41.95	38.04	0.859	4.44	5.17	0.832	10.82	13	1.343	26.69	19.87	0.755	0.84	1.12	1.1504	44.2457	2	2	2	0	0	0	0	0	0	0	0	0	0	0	0	0	0	0	0	0	0	0	0	0	0	0	0	0	0	0	0
118	109921	0.788	21.75	27.61	0.65	3.2	4.93	0.622	6.35	10.21	0.978	12.19	12.47	0.631	0.81	1.29	1.1413	52.0374	2	2	2	0	0	0	0	0	0	0	0	0	0	0	0	0	0	0	0	0	0	0	0	0	0	0	0	0	0	0	0
119	109930	0.986	46.96	47.65	0.907	5.33	5.88	0.748	10.86	14.51	1.129	30.78	27.26	0.545	0.63	1.16	1.1193	45.7716	2	2	1	0	0	1	0	0	0	0	0	0	0	0	0	0	0	0	0	0	0	0	0	0	0	0	0	0	0	0	0
120	109932	1.135	57.95	51.04	0.947	5.64	5.96	0.845	15.31	18.12	1.372	36.99	26.96	0.638	0.7	1.1	1.1531	45.0818	2	2	2	0	0	0	0	0	0	0	0	0	0	0	0	0	0	0	0	0	0	0	0	0	0	0	0	0	0	0	0
121	109940	0.8	26.9	33.64	0.768	3.95	5.14	0.596	6.29	10.54	0.928	16.67	17.96	0.606	0.7	1.16	1.1524	46.8569	2	2	2	0	0	0	0	0	0	0	0	0	0	0	0	0	0	0	0	0	0	0	0	0	0	0	0	0	0	0	0
122	109942	0.843	28.41	33.72	0.724	3.65	5.05	0.611	7.01	11.48	1.032	17.75	17.2	0.519	0.54	1.04	1.1606	48.2028	2	2	2	0	0	0	0	0	0	0	0	0	0	0	0	0	0	0	0	0	0	0	0	0	0	0	0	0	0	0	0
123	109947	1.197	53.99	45.12	1.091	6.11	5.6	0.965	13.78	14.28	1.351	34.11	25.24	1.039	1.08	1.04	1.1316	49.4887	2	1	2	0	1	0	0	0	0	0	0	0	0	0	0	21	1	0	0	0	0	0	0	0	0	0	0	0	0	0	0
124	109957	0.813	22.77	28.02	0.679	3.02	4.45	0.584	4.43	7.6	0.959	15.31	15.97	0.617	0.81	1.32	1.1501	47.6681	2	2	2	0	0	0	0	0	0	0	0	0	0	0	0	0	0	0	0	0	0	0	0	0	0	0	0	0	0	0	0
125	109960	0.991	34.62	34.94	0.866	4.68	5.41	0.731	8	10.93	1.179	21.94	18.6	0.724	0.75	1.04	1.1545	46.0284	2	2	2	0	0	0	0	0	0	0	0	0	0	0	0	0	0	0	0	0	0	0	0	0	0	0	0	0	0	0	0
126	109962	0.888	43.42	48.87	0.684	4.16	6.08	0.617	9.8	15.89	1.095	29.45	26.9	0.368	0.39	1.05	1.1387	51.243	2	2	2	0	0	0	0	0	0	0	0	0	0	0	0	0	0	0	0	0	0	0	0	0	0	0	0	0	0	0	0
127	109966	1.152	41.51	36.04	0.892	4.56	5.11	0.869	10.36	11.91	1.399	26.58	19.01	0.839	0.87	1.04	1.1416	52.2073	2	2	2	0	0	0	0	0	0	0	0	0	0	0	0	0	0	0	0	0	0	0	0	0	0	0	0	0	0	0	0
128	109971	0.729	21.67	29.75	0.681	3.31	4.86	0.628	5.61	8.93	0.8	12.75	15.95	0.464	0.53	1.14	1.1553	47.5419	2	2	2	0	0	0	0	0	0	0	0	0	0	0	0	0	0	0	0	0	0	0	0	0	0	0	0	0	0	0	0
129	109976	0.866	39.87	46.02	0.716	3.93	5.48	0.634	8.87	13.98	1.02	27.07	26.55	0.405	0.44	1.08	1.1365	50.1285	2	2	2	0	0	0	0	0	0	0	0	0	0	0	0	0	0	0	0	0	0	0	0	0	0	0	0	0	0	0	0
130	109977	0.855	24.13	28.21	0.805	4.05	5.03	0.677	6.39	9.44	0.997	13.7	13.74	0.558	0.66	1.18	1.1434	51.9395	2	2	2	0	0	0	0	0	0	0	0	0	0	0	0	0	0	0	0	0	0	0	0	0	0	0	0	0	0	0	0
131	109981	0.897	26.63	29.69	0.696	3.24	4.66	0.713	6.94	9.74	1.076	16.45	15.29	0.583	0.76	1.3	1.1616	48.375	2	2	2	0	0	0	0	0	0	0	0	0	0	0	0	0	0	0	0	0	0	0	0	0	0	0	0	0	0	0	0
132	109987	0.851	30.41	35.72	0.659	3.55	5.39	0.622	7.86	12.63	1.074	19	17.7	0.46	0.53	1.16	1.155	46.0129	2	2	2	0	0	0	0	0	0	0	0	0	0	0	0	0	0	0	0	0	0	0	0	0	0	0	0	0	0	0	0
133	109990	0.861	32.05	37.25	0.689	3.66	5.31	0.629	6.5	10.32	1.013	21.9	21.62	0.335	0.38	1.14	1.135	48.7252	2	2	2	0	0	0	0	0	0	0	0	0	0	0	0	0	0	0	0	0	0	0	0	0	0	0	0	0	0	0	0
134	109991	0.968	40.75	42.1	0.873	5.02	5.75	0.818	11.44	13.99	1.087	24.29	22.36	0.623	0.71	1.13	1.1507	42.9206	2	1	2	0	1	0	0	0	0	0	0	0	0	0	0	8	1	0	0	0	0	0	0	0	0	0	0	0	0	0	0
135	109992	1.169	49.43	42.3	0.963	4.94	5.14	0.808	10.44	12.92	1.404	34.04	24.24	0.698	0.81	1.16	1.133	46.4093	2	2	2	0	0	0	0	0	0	0	0	0	0	0	0	0	0	0	0	0	0	0	0	0	0	0	0	0	0	0	0
136	109994	0.653	23.71	36.3	0.544	2.79	5.13	0.472	5.32	11.26	0.784	15.6	19.91	0.259	0.3	1.17	1.13	47.1306	2	2	2	0	0	0	0	0	0	0	0	0	0	0	0	0	0	0	0	0	0	0	0	0	0	0	0	0	0	0	0
137	110006	0.652	18.66	28.59	0.6	2.87	4.78	0.473	4.16	8.78	0.774	11.63	15.02	0.327	0.38	1.16	1.154	48.0981	2	2	2	0	0	0	0	0	0	0	0	0	0	0	0	0	0	0	0	0	0	0	0	0	0	0	0	0	0	0	0
138	110010	0.91	32.44	35.63	0.816	3.14	3.84	0.721	7.82	10.84	1.026	21.48	20.94	0.73	0.95	1.3	1.1399	50.3533	2	2	2	0	0	0	0	0	0	0	0	0	0	0	0	0	0	0	0	0	0	0	0	0	0	0	0	0	0	0	0
139	110012	1.07	41.87	39.14	0.937	4.79	5.11	0.827	10.84	13.11	1.254	26.24	20.93	0.686	0.81	1.18	1.1471	42.9349	2	2	2	0	0	0	0	0	0	0	0	0	0	0	0	0	0	0	0	0	0	0	0	0	0	0	0	0	0	0	0
140	110015	1.224	38	31.05	1.011	4.88	4.82	0.886	9.04	10.21	1.503	24.08	16.02	0.876	0.91	1.04	1.1515	46.8938	2	2	2	0	0	0	0	0	0	0	0	0	0	0	0	0	0	0	0	0	0	0	0	0	0	0	0	0	0	0	0
141	110023	0.928	35.22	37.96	0.719	3.75	5.21	0.73	8.87	12.15	1.097	22.6	20.6	0.577	0.6	1.04	1.1358	51.5695	2	2	2	0	0	0	0	0	0	0	0	0	0	0	0	0	0	0	0	0	0	0	0	0	0	0	0	0	0	0	0
142	110036	0.973	33.87	34.79	0.889	4.76	5.36	0.704	6.76	9.6	1.127	22.35	19.83	0.7	0.92	1.32	1.1452	43.6403	2	2	2	0	0	0	0	0	0	0	0	0	0	0	0	0	0	0	0	0	0	0	0	0	0	0	0	0	0	0	0
143	110037	1.096	42.34	38.61	0.792	3.93	4.96	0.875	9.3	10.62	1.264	29.11	23.03	0.507	0.6	1.17	1.1498	38.8415	2	2	2	0	0	0	0	0	0	0	0	0	0	0	0	0	0	0	0	0	0	0	0	0	0	0	0	0	0	0	0
144	110038	0.704	17.98	25.55	0.586	2.5	4.27	0.436	3.56	8.17	0.908	11.91	13.11	0.458	0.48	1.04	1.1444	53.4215	2	2	2	0	0	0	0	0	0	0	0	0	0	0	0	0	0	0	0	0	0	0	0	0	0	0	0	0	0	0	0
145	110042	0.918	27.66	30.12	0.75	3.57	4.76	0.738	7.49	10.14	1.091	16.6	15.22	0.54	0.6	1.12	1.1357	48.1973	2	2	2	0	0	0	0	0	0	0	0	0	0	0	0	0	0	0	0	0	0	0	0	0	0	0	0	0	0	0	0
146	110045	0.624	19.77	31.67	0.544	2.78	5.12	0.463	5.09	11	0.765	11.9	15.55	0.499	0.46	0.92	1.1462	44.5269	2	2	2	0	0	0	0	0	0	0	0	0	0	0	0	0	0	0	0	0	0	0	0	0	0	0	0	0	0	0	0
147	110055	0.886	40.68	45.92	0.669	4.1	6.13	0.704	11.16	15.86	1.062	25.42	23.93	0.407	0.45	1.11	1.1334	46.9298	2	2	2	0	0	0	0	0	0	0	0	0	0	0	0	0	0	0	0	0	0	0	0	0	0	0	0	0	0	0	0
148	110056	1	40.05	40.07	0.849	4.47	5.26	0.762	9.97	13.08	1.179	25.61	21.73	0.564	0.66	1.16	1.1331	49.625	2	2	2	0	0	0	0	0	0	0	0	0	0	0	0	0	0	0	0	0	0	0	0	0	0	0	0	0	0	0	0
149	110057	1.134	47.39	41.8	0.997	5.61	5.62	0.798	10.04	12.58	1.345	31.74	23.59	0.704	0.82	1.16	1.1316	44.9345	2	2	2	0	0	0	0	0	0	0	0	0	0	0	0	0	0	0	0	0	0	0	0	0	0	0	0	0	0	0	0
150	110061	1.035	34.45	33.29	0.788	4.36	5.53	0.781	8.18	10.47	1.268	21.91	17.29	0.559	0.65	1.16	1.157	46.5282	2	2	2	0	0	0	0	0	0	0	0	0	0	0	0	0	0	0	0	0	0	0	0	0	0	0	0	0	0	0	0
151	110064	0.878	35.37	40.31	0.688	3.97	5.77	0.609	8.48	13.93	1.112	22.93	20.61	0.487	0.57	1.17	1.1594	47.1221	2	2	2	0	0	0	0	0	0	0	0	0	0	0	0	0	0	0	0	0	0	0	0	0	0	0	0	0	0	0	0
152	110065	1.023	39.69	38.79	0.786	4.27	5.44	0.768	9.12	11.88	1.224	26.3	21.48	0.503	0.57	1.14	1.156	44.7574	2	2	2	0	0	0	0	0	0	0	0	0	0	0	0	0	0	0	0	0	0	0	0	0	0	0	0	0	0	0	0
153	110079	1.011	27.83	27.54	0.878	4.19	4.77	0.743	6.35	8.54	1.216	17.3	14.22	0.676	0.78	1.16	1.1327	46.3389	2	1	2	0	1	0	0	0	0	0	0	0	0	0	0	50	2	1	0	0	0	0	0	0	0	0	0	0	0	0	0
154	110085	0.771	31.2	40.47	0.623	3.12	5.02	0.544	7.44	13.68	0.948	20.64	21.77	0.455	0.59	1.3	1.1365	47.1117	2	2	2	0	0	0	0	0	0	0	0	0	0	0	0	0	0	0	0	0	0	0	0	0	0	0	0	0	0	0	0
155	110090	1.228	47.37	38.58	1.046	5.38	5.15	0.953	12.12	12.72	1.442	29.86	20.71	0.758	0.91	1.19	1.1448	42.332	2	2	2	0	0	0	0	0	0	0	0	0	0	0	0	0	0	0	0	0	0	0	0	0	0	0	0	0	0	0	0
156	110096	0.975	36.09	37.02	0.8	4	5	0.727	9.09	12.51	1.179	23	19.51	0.541	0.6	1.1	1.1381	49.8039	2	2	2	0	0	0	0	0	0	0	0	0	0	0	0	0	0	0	0	0	0	0	0	0	0	0	0	0	0	0	0
157	110125	0.859	29.03	33.78	0.655	3.15	4.81	0.648	6.21	9.59	1.015	19.67	19.38	0.43	0.51	1.17	1.1448	44.7927	2	2	2	0	0	0	0	0	0	0	0	0	0	0	0	0	0	0	0	0	0	0	0	0	0	0	0	0	0	0	0
158	110129	1.232	49.47	40.15	1.081	5.82	5.39	0.894	10.3	11.52	1.435	33.35	23.24	0.864	1	1.16	1.1262	47.0453	2	2	2	0	0	0	0	0	0	0	0	0	0	0	0	0	0	0	0	0	0	0	0	0	0	0	0	0	0	0	0
159	110130	0.905	29.93	33.08	0.731	3.68	5.03	0.668	7.2	10.78	1.103	19.05	17.27	0.558	0.62	1.12	1.1358	49.7552	2	2	2	0	0	0	0	0	0	0	0	0	0	0	0	0	0	0	0	0	0	0	0	0	0	0	0	0	0	0	0
160	110131	0.713	33.67	47.22	0.597	3.72	6.24	0.576	7.94	13.79	0.809	22	27.19	0.374	0.41	1.09	1.1521	45.7638	2	1	2	0	1	0	0	0	0	0	0	0	0	0	0	57	2	3	0	0	0	0	0	0	0	0	0	0	0	0	0
161	110137	0.978	45.65	46.7	0.841	4.84	5.75	0.773	10.43	13.49	1.107	30.39	27.45	0.652	0.71	1.08	1.1356	51.3996	2	2	2	0	0	0	0	0	0	0	0	0	0	0	0	0	0	0	0	0	0	0	0	0	0	0	0	0	0	0	0
162	110144	1.05	31.75	30.23	0.857	4.32	5.05	0.811	8.17	10.07	1.274	19.26	15.12	0.583	0.65	1.12	1.1599	45.8138	2	2	2	0	0	0	0	0	0	0	0	0	0	0	0	0	0	0	0	0	0	0	0	0	0	0	0	0	0	0	0
163	110147	0.844	21.69	25.7	0.659	2.92	4.43	0.661	4.42	6.69	0.984	14.35	14.59	0.552	0.64	1.15	1.1388	50.702	2	2	2	0	0	0	0	0	0	0	0	0	0	0	0	0	0	0	0	0	0	0	0	0	0	0	0	0	0	0	0
164	110153	0.972	30.85	31.74	0.764	3.71	4.85	0.691	6.49	9.4	1.18	20.65	17.49	0.707	0.93	1.32	1.1487	44.8212	2	2	2	0	0	0	0	0	0	0	0	0	0	0	0	0	0	0	0	0	0	0	0	0	0	0	0	0	0	0	0
165	110161	1.193	35.3	29.59	1.07	4.78	4.46	0.881	8.23	9.35	1.413	22.3	15.78	1.034	1.34	1.3	1.1311	45.736	2	2	2	0	0	0	0	0	0	0	0	0	0	0	0	0	0	0	0	0	0	0	0	0	0	0	0	0	0	0	0
166	110168	0.932	30.21	32.4	0.845	3.74	4.42	0.687	6.81	9.93	1.089	19.66	18.05	0.8	1.04	1.31	1.1322	50.4097	2	2	2	0	0	0	0	0	0	0	0	0	0	0	0	0	0	0	0	0	0	0	0	0	0	0	0	0	0	0	0
167	110172	0.921	24.86	27.01	0.789	3.24	4.11	0.721	6.73	9.34	1.098	14.89	13.56	0.594	0.64	1.08	1.1394	49.7313	2	2	2	0	0	0	0	0	0	0	0	0	0	0	0	0	0	0	0	0	0	0	0	0	0	0	0	0	0	0	0
168	110178	0.959	26.11	27.22	0.863	3.82	4.43	0.795	6.88	8.65	1.089	15.41	14.15	0.656	0.75	1.14	1.1323	52.8161	2	2	2	0	0	0	0	0	0	0	0	0	0	0	0	0	0	0	0	0	0	0	0	0	0	0	0	0	0	0	0
169	110180	0.963	46.91	48.69	0.767	4.82	6.28	0.759	11.07	14.59	1.115	31.02	27.82	0.509	0.56	1.1	1.1467	45.8667	2	2	2	0	0	0	0	0	0	0	0	0	0	0	0	0	0	0	0	0	0	0	0	0	0	0	0	0	0	0	0
170	110185	0.808	27.9	34.54	0.595	2.84	4.77	0.63	6.94	11.01	0.966	18.12	18.76	0.437	0.51	1.17	1.1476	45.7812	2	2	2	0	0	0	0	0	0	0	0	0	0	0	0	0	0	0	0	0	0	0	0	0	0	0	0	0	0	0	0
171	110187	1.024	33.6	32.8	0.887	3.74	4.22	0.798	8.07	10.12	1.18	21.78	18.45	0.743	0.96	1.3	1.1303	44.6667	2	2	2	0	0	0	0	0	0	0	0	0	0	0	0	0	0	0	0	0	0	0	0	0	0	0	0	0	0	0	0
172	110188	0.897	29.16	32.5	0.749	3.58	4.77	0.645	6.27	9.72	1.073	19.32	18	0.531	0.62	1.17	1.1332	48.9566	2	2	2	0	0	0	0	0	0	0	0	0	0	0	0	0	0	0	0	0	0	0	0	0	0	0	0	0	0	0	0
173	110191	0.815	35.46	43.49	0.682	3.88	5.7	0.602	8.14	13.52	0.966	23.43	24.27	0.433	0.49	1.14	1.1629	47.9977	2	1	2	0	1	0	0	0	0	0	0	0	0	0	0	50	2	2	0	0	0	0	0	0	0	0	0	0	0	0	0
174	110194	0.941	33.96	36.09	0.7	3.35	4.79	0.691	8.43	12.19	1.161	22.18	19.11	0.428	0.48	1.11	1.1491	42.7112	2	2	2	0	0	0	0	0	0	0	0	0	0	0	0	0	0	0	0	0	0	0	0	0	0	0	0	0	0	0	0
175	110196	0.897	36.47	40.67	0.716	3.97	5.55	0.649	7.25	11.17	1.054	25.25	23.96	0.435	0.51	1.17	1.1544	47.0337	2	2	2	0	0	0	0	0	0	0	0	0	0	0	0	0	0	0	0	0	0	0	0	0	0	0	0	0	0	0	0
176	110200	1.023	38.59	37.71	0.961	4.63	4.82	0.704	9.79	13.9	1.272	24.16	18.99	0.801	0.83	1.04	1.1341	50.1887	2	2	2	0	0	0	0	0	0	0	0	0	0	0	0	0	0	0	0	0	0	0	0	0	0	0	0	0	0	0	0
177	110207	1.046	31.9	30.49	0.918	4.21	4.58	0.796	9.11	11.45	1.285	18.58	14.46	0.863	0.89	1.04	1.1592	46.7841	2	2	2	0	0	0	0	0	0	0	0	0	0	0	0	0	0	0	0	0	0	0	0	0	0	0	0	0	0	0	0
178	110217	0.871	25.56	29.35	0.774	3.29	4.26	0.669	6.14	9.18	1.014	16.13	15.91	0.628	0.82	1.3	1.14	49.3926	2	2	2	0	0	0	0	0	0	0	0	0	0	0	0	0	0	0	0	0	0	0	0	0	0	0	0	0	0	0	0
179	110241	1.004	40.15	39.98	0.835	4.35	5.2	0.643	7.54	11.72	1.226	28.27	23.05	0.485	0.54	1.12	1.1397	51.3006	2	2	2	0	0	0	0	0	0	0	0	0	0	0	0	0	0	0	0	0	0	0	0	0	0	0	0	0	0	0	0
180	110251	0.89	27.68	31.1	0.708	3.78	5.33	0.649	6.85	10.56	1.121	17.05	15.21	0.602	0.78	1.3	1.1377	51.6224	2	2	2	0	0	0	0	0	0	0	0	0	0	0	0	0	0	0	0	0	0	0	0	0	0	0	0	0	0	0	0
181	110252	0.857	39.61	46.24	0.695	4.68	6.73	0.712	10.42	14.63	0.986	24.51	24.87	0.372	0.42	1.14	1.1374	50.3803	2	2	2	0	0	0	0	0	0	0	0	0	0	0	0	0	0	0	0	0	0	0	0	0	0	0	0	0	0	0	0
182	110254	1.024	39.67	38.73	0.882	4.56	5.17	0.706	7.27	10.3	1.197	27.84	23.26	0.612	0.67	1.1	1.1377	54.0845	2	2	2	0	0	0	0	0	0	0	0	0	0	0	0	0	0	0	0	0	0	0	0	0	0	0	0	0	0	0	0
183	110258	0.592	24.29	41.05	0.556	3.37	6.07	0.401	6.37	15.87	0.761	14.54	19.12	0.358	0.38	1.07	1.1526	46.7132	2	2	2	0	0	0	0	0	0	0	0	0	0	0	0	0	0	0	0	0	0	0	0	0	0	0	0	0	0	0	0
184	110264	0.876	38.17	43.56	0.759	4.38	5.77	0.632	9.05	14.33	1.055	24.74	23.46	0.439	0.51	1.16	1.1329	48.234	2	2	2	0	0	0	0	0	0	0	0	0	0	0	0	0	0	0	0	0	0	0	0	0	0	0	0	0	0	0	0
185	110270	1.284	61.01	47.51	0.985	5.23	5.31	1.025	14.6	14.25	1.474	41.19	27.95	0.713	0.83	1.17	1.1503	40.9393	2	2	2	0	0	0	0	0	0	0	0	0	0	0	0	0	0	0	0	0	0	0	0	0	0	0	0	0	0	0	0
186	110273	1.057	35.29	33.38	0.762	3.57	4.68	0.818	8.44	10.32	1.267	23.28	18.37	0.561	0.65	1.16	1.1572	44.4124	2	2	2	0	0	0	0	0	0	0	0	0	0	0	0	0	0	0	0	0	0	0	0	0	0	0	0	0	0	0	0
187	110279	0.88	29.21	33.2	0.861	4.15	4.82	0.614	5.97	9.72	1.023	19.09	18.66	0.604	0.7	1.15	1.1463	42.8798	2	2	2	0	0	0	0	0	0	0	0	0	0	0	0	0	0	0	0	0	0	0	0	0	0	0	0	0	0	0	0
188	110287	1.017	36.92	36.29	0.834	4.35	5.22	0.741	8.45	11.39	1.226	24.12	19.68	0.641	0.75	1.17	1.1402	49.4219	2	2	2	0	0	0	0	0	0	0	0	0	0	0	0	0	0	0	0	0	0	0	0	0	0	0	0	0	0	0	0
189	110290	0.8	25.78	32.22	0.556	2.86	5.15	0.58	5.74	9.9	1	17.18	17.18	0.396	0.44	1.11	1.1615	50.1483	2	2	2	0	0	0	0	0	0	0	0	0	0	0	0	0	0	0	0	0	0	0	0	0	0	0	0	0	0	0	0
190	110292	0.985	41.09	41.73	0.677	3.89	5.75	0.824	9.69	11.76	1.136	27.51	24.22	0.496	0.58	1.17	1.1522	46.4806	2	2	2	0	0	0	0	0	0	0	0	0	0	0	0	0	0	0	0	0	0	0	0	0	0	0	0	0	0	0	0
191	110300	0.442	13.89	31.45	0.349	1.7	4.86	0.348	3.28	9.41	0.519	8.92	17.19	0.208	0.25	1.18	1.1586	49.4108	2	2	2	0	0	0	0	0	0	0	0	0	0	0	0	0	0	0	0	0	0	0	0	0	0	0	0	0	0	0	0
192	110306	1.113	28.62	25.72	0.985	3.62	3.68	0.816	6.5	7.97	1.315	18.5	14.07	0.917	1.2	1.3	1.1225	47.3912	2	2	2	0	0	0	0	0	0	0	0	0	0	0	0	0	0	0	0	0	0	0	0	0	0	0	0	0	0	0	0
193	110310	0.855	26.52	31.02	0.711	3.38	4.76	0.664	5.69	8.58	0.986	17.44	17.69	0.618	0.81	1.31	1.1342	50.5903	2	2	2	0	0	0	0	0	0	0	0	0	0	0	0	0	0	0	0	0	0	0	0	0	0	0	0	0	0	0	0
194	110311	0.833	29.17	35.02	0.709	3.65	5.15	0.652	7.42	11.39	0.979	18.1	18.48	0.516	0.61	1.18	1.148	45.11	2	2	2	0	0	0	0	0	0	0	0	0	0	0	0	0	0	0	0	0	0	0	0	0	0	0	0	0	0	0	0
195	110317	0.784	26.87	34.25	0.615	3.12	5.08	0.621	6.48	10.43	0.921	17.27	18.75	0.488	0.63	1.3	1.1351	48.4287	2	2	2	0	0	0	0	0	0	0	0	0	0	0	0	0	0	0	0	0	0	0	0	0	0	0	0	0	0	0	0
196	110318	0.918	38.65	42.11	0.724	4.23	5.84	0.725	8.82	12.16	1.062	25.6	24.11	0.6	0.77	1.29	1.1513	45.3042	2	2	2	0	0	0	0	0	0	0	0	0	0	0	0	0	0	0	0	0	0	0	0	0	0	0	0	0	0	0	0
197	110328	0.867	37.19	42.9	0.788	4.5	5.71	0.593	8.87	14.95	1.071	23.82	22.24	0.55	0.65	1.17	1.1451	43.5705	2	2	2	0	0	0	0	0	0	0	0	0	0	0	0	0	0	0	0	0	0	0	0	0	0	0	0	0	0	0	0
198	110329	0.719	33.97	47.22	0.644	4.21	6.54	0.521	7.21	13.84	0.84	22.55	26.84	0.537	0.7	1.31	1.1347	50.594	2	2	2	0	0	0	0	0	0	0	0	0	0	0	0	0	0	0	0	0	0	0	0	0	0	0	0	0	0	0	0
199	110336	0.856	28.48	33.28	0.721	3.88	5.38	0.656	7	10.66	1.021	17.61	17.24	0.454	0.53	1.17	1.1492	46.4747	2	2	2	0	0	0	0	0	0	0	0	0	0	0	0	0	0	0	0	0	0	0	0	0	0	0	0	0	0	0	0
200	110350	1.01	34.53	34.17	0.773	3.68	4.75	0.753	9.38	12.46	1.266	21.47	16.95	0.507	0.53	1.04	1.1523	46.0136	2	2	2	0	0	0	0	0	0	0	0	0	0	0	0	0	0	0	0	0	0	0	0	0	0	0	0	0	0	0	0
201	110353	0.998	50.79	50.89	0.812	4.28	5.27	0.732	12.16	16.61	1.184	34.35	29.01	0.564	0.67	1.19	1.153	43.9375	2	2	2	0	0	0	0	0	0	0	0	0	0	0	0	0	0	0	0	0	0	0	0	0	0	0	0	0	0	0	0
202	110359	0.922	35.85	38.86	0.741	3.39	4.58	0.697	9.48	13.6	1.111	22.98	20.68	0.526	0.6	1.14	1.1366	47.2825	2	2	2	0	0	0	0	0	0	0	0	0	0	0	0	0	0	0	0	0	0	0	0	0	0	0	0	0	0	0	0
203	110366	0.941	46.89	49.85	0.689	4.03	5.84	0.73	11.17	15.31	1.105	31.7	28.7	0.461	0.52	1.13	1.1502	45.9159	2	2	2	0	0	0	0	0	0	0	0	0	0	0	0	0	0	0	0	0	0	0	0	0	0	0	0	0	0	0	0
204	110368	0.729	23.19	31.83	0.695	2.73	3.93	0.573	5.21	9.1	0.811	15.25	18.81	0.451	0.59	1.32	1.1463	44.8621	2	2	2	0	0	0	0	0	0	0	0	0	0	0	0	0	0	0	0	0	0	0	0	0	0	0	0	0	0	0	0
205	110372	1.134	51.77	45.65	0.67	4.17	6.23	0.831	11.9	14.33	1.423	35.7	25.09	0.466	0.54	1.16	1.153	45.7977	2	2	2	0	0	0	0	0	0	0	0	0	0	0	0	0	0	0	0	0	0	0	0	0	0	0	0	0	0	0	0
206	110377	0.526	19.75	37.51	0.417	2.13	5.11	0.388	4.32	11.14	0.625	13.3	21.26	0.221	0.26	1.16	1.1354	54.7077	2	2	2	0	0	0	0	0	0	0	0	0	0	0	0	0	0	0	0	0	0	0	0	0	0	0	0	0	0	0	0
207	110384	0.917	41.22	44.95	0.678	3.91	5.77	0.755	10.21	13.52	1.056	27.1	25.66	0.395	0.45	1.14	1.1342	47.1239	2	2	2	0	0	0	0	0	0	0	0	0	0	0	0	0	0	0	0	0	0	0	0	0	0	0	0	0	0	0	0
208	110387	0.994	47.37	47.64	0.814	4.24	5.22	0.756	10.65	14.09	1.146	32.47	28.33	0.484	0.54	1.12	1.1309	42.6936	2	2	2	0	0	0	0	0	0	0	0	0	0	0	0	0	0	0	0	0	0	0	0	0	0	0	0	0	0	0	0
209	110389	1.07	56.2	52.54	0.821	5.13	6.26	0.909	15.08	16.6	1.212	35.98	29.68	0.544	0.61	1.12	1.1372	50.9456	2	2	2	0	0	0	0	0	0	0	0	0	0	0	0	0	0	0	0	0	0	0	0	0	0	0	0	0	0	0	0
210	110390	1.007	44.69	44.38	0.792	4.39	5.54	0.717	8.89	12.41	1.189	31.41	26.42	0.615	0.8	1.3	1.1308	46.1665	2	2	2	0	0	0	0	0	0	0	0	0	0	0	0	0	0	0	0	0	0	0	0	0	0	0	0	0	0	0	0
211	110397	0.907	34.31	37.83	0.765	4.36	5.7	0.771	8.68	11.27	1.02	21.27	20.86	0.531	0.59	1.12	1.1576	45.4812	2	2	2	0	0	0	0	0	0	0	0	0	0	0	0	0	0	0	0	0	0	0	0	0	0	0	0	0	0	0	0
212	110405	0.896	34.66	38.69	0.662	3.69	5.58	0.625	8.62	13.79	1.157	22.35	19.32	0.477	0.56	1.17	1.1365	46.6553	2	2	2	0	0	0	0	0	0	0	0	0	0	0	0	0	0	0	0	0	0	0	0	0	0	0	0	0	0	0	0
213	110409	1.006	35.14	34.92	0.908	4.35	4.78	0.754	8.47	11.24	1.181	22.32	18.9	0.775	0.8	1.04	1.1553	47.0086	2	2	2	0	0	0	0	0	0	0	0	0	0	0	0	0	0	0	0	0	0	0	0	0	0	0	0	0	0	0	0
214	110412	0.837	29.1	34.64	0.647	3.58	5.54	0.643	7.61	11.84	1.037	17.91	17.27	0.416	0.48	1.17	1.1547	47.1742	2	2	2	0	0	0	0	0	0	0	0	0	0	0	0	0	0	0	0	0	0	0	0	0	0	0	0	0	0	0	0
215	110415	1.01	37.05	36.68	0.725	3.83	5.28	0.859	9.82	11.43	1.172	23.41	19.98	0.51	0.59	1.16	1.1564	46.413	0	0	0	0	0	0	0	0	0	0	0	0	0	0	0	0	0	0	0	0	0	0	0	0	0	0	0	0	0	0	0
216	110418	0.957	35	36.56	0.744	4.15	5.58	0.515	4.73	9.19	1.199	26.12	21.79	0.621	0.65	1.05	1.1392	42.7949	2	2	2	0	0	0	0	0	0	0	0	0	0	0	0	0	0	0	0	0	0	0	0	0	0	0	0	0	0	0	0
217	110426	0.949	41.61	43.85	0.822	4.36	5.3	0.767	10.44	13.61	1.075	26.81	24.94	0.599	0.68	1.14	1.1374	51.8976	2	2	2	0	0	0	0	0	0	0	0	0	0	0	0	0	0	0	0	0	0	0	0	0	0	0	0	0	0	0	0
218	110431	0.648	20.9	32.23	0.7	3.08	4.4	0.497	5.94	11.96	0.748	11.88	15.87	0.458	0.59	1.3	1.1399	52.5243	2	2	2	0	0	0	0	0	0	0	0	0	0	0	0	0	0	0	0	0	0	0	0	0	0	0	0	0	0	0	0
219	110438	0.863	28.06	32.53	0.775	3.46	4.46	0.65	6.47	9.96	1.002	18.14	18.11	0.744	0.97	1.31	1.1333	50.2485	2	2	2	0	0	0	0	0	0	0	0	0	0	0	0	0	0	0	0	0	0	0	0	0	0	0	0	0	0	0	0
220	110440	0.928	45.73	49.28	0.718	4.94	6.88	0.712	11.42	16.05	1.115	29.37	26.34	0.45	0.52	1.16	1.1507	43.4847	2	2	2	0	0	0	0	0	0	0	0	0	0	0	0	0	0	0	0	0	0	0	0	0	0	0	0	0	0	0	0
221	110443	0.662	22.8	34.47	0.505	2.38	4.72	0.495	5.11	10.32	0.788	15.31	19.43	0.326	0.36	1.1	1.146	57.0583	2	2	2	0	0	0	0	0	0	0	0	0	0	0	0	0	0	0	0	0	0	0	0	0	0	0	0	0	0	0	0
222	110446	1.152	51.5	44.69	0.97	5.77	5.94	0.887	14.04	15.83	1.383	31.7	22.92	0.752	0.79	1.05	1.147	42.0439	2	2	2	0	0	0	0	0	0	0	0	0	0	0	0	0	0	0	0	0	0	0	0	0	0	0	0	0	0	0	0
223	110449	1.116	31.52	28.25	0.973	4.65	4.78	0.809	7.27	9	1.354	19.6	14.47	0.768	0.9	1.17	1.1307	46.9985	2	2	2	0	0	0	0	0	0	0	0	0	0	0	0	0	0	0	0	0	0	0	0	0	0	0	0	0	0	0	0
224	110453	0.789	25.18	31.89	0.707	3.61	5.1	0.602	6.5	10.8	0.943	15.07	15.99	0.387	0.46	1.18	1.1398	51.9515	2	2	2	0	0	0	0	0	0	0	0	0	0	0	0	0	0	0	0	0	0	0	0	0	0	0	0	0	0	0	0
225	110454	0.804	28.05	34.9	0.724	3.62	5	0.614	6.64	10.82	0.932	17.78	19.08	0.493	0.55	1.12	1.1563	47.2819	2	2	2	0	0	0	0	0	0	0	0	0	0	0	0	0	0	0	0	0	0	0	0	0	0	0	0	0	0	0	0
226	110461	1.028	47.23	45.93	0.871	5.02	5.77	0.792	11.82	14.93	1.204	30.38	25.23	0.675	0.8	1.18	1.1371	53.5188	2	1	2	0	1	0	0	0	0	0	0	0	0	0	0	15	1	0	0	0	0	0	0	0	0	0	0	0	0	0	0
227	110468	0.972	42.78	44.02	0.802	5.14	6.42	0.677	8.99	13.27	1.177	28.65	24.33	0.451	0.51	1.12	1.1355	44.367	2	2	2	0	0	0	0	0	0	0	0	0	0	0	0	0	0	0	0	0	0	0	0	0	0	0	0	0	0	0	0
228	110479	0.877	31.42	35.83	0.752	4.08	5.42	0.672	7.43	11.06	1.029	19.91	19.35	0.419	0.49	1.17	1.1322	49.6044	2	2	2	0	0	0	0	0	0	0	0	0	0	0	0	0	0	0	0	0	0	0	0	0	0	0	0	0	0	0	0
229	110482	1.065	43.27	40.62	0.978	4.46	4.56	0.868	9.08	10.46	1.161	29.74	25.6	0.703	0.76	1.08	1.1404	50.241	2	1	2	0	1	0	0	0	0	0	0	0	0	0	0	17	1	0	0	0	0	0	0	0	0	0	0	0	0	0	0
230	110496	0.988	33.33	33.73	0.803	4.14	5.16	0.829	8.86	10.69	1.137	20.33	17.88	0.737	0.97	1.32	1.1488	43.5522	2	2	2	0	0	0	0	0	0	0	0	0	0	0	0	0	0	0	0	0	0	0	0	0	0	0	0	0	0	0	0
231	110498	0.889	28.12	31.62	0.679	3.32	4.9	0.655	6.5	9.94	1.09	18.3	16.79	0.472	0.53	1.12	1.1379	52.8391	2	2	2	0	0	0	0	0	0	0	0	0	0	0	0	0	0	0	0	0	0	0	0	0	0	0	0	0	0	0	0
232	110506	0.784	35.63	45.44	0.57	3.34	5.86	0.59	8.66	14.67	0.949	23.63	24.91	0.305	0.36	1.17	1.1458	51.3418	2	2	2	0	0	0	0	0	0	0	0	0	0	0	0	0	0	0	0	0	0	0	0	0	0	0	0	0	0	0	0
233	110508	0.711	21.18	29.78	0.626	3.17	5.07	0.582	5.14	8.83	0.811	12.87	15.88	0.373	0.42	1.13	1.1517	46.7777	2	2	2	0	0	0	0	0	0	0	0	0	0	0	0	0	0	0	0	0	0	0	0	0	0	0	0	0	0	0	0
234	110509	0.86	41.69	48.46	0.726	4.1	5.65	0.63	9.32	14.78	1.009	28.27	28.02	0.482	0.63	1.3	1.1298	51.3784	2	2	2	0	0	0	0	0	0	0	0	0	0	0	0	0	0	0	0	0	0	0	0	0	0	0	0	0	0	0	0
235	110510	1.026	34.51	33.63	0.922	4.68	5.07	0.707	7.23	10.23	1.233	22.6	18.33	0.83	1.09	1.31	1.1309	49.5962	2	2	2	0	0	0	0	0	0	0	0	0	0	0	0	0	0	0	0	0	0	0	0	0	0	0	0	0	0	0	0
236	110514	1.033	46.34	44.86	0.899	5.38	5.99	0.732	10.35	14.13	1.238	30.61	24.74	0.642	0.75	1.17	1.1363	47.9731	2	2	2	0	0	0	0	0	0	0	0	0	0	0	0	0	0	0	0	0	0	0	0	0	0	0	0	0	0	0	0
237	110518	0.723	22.39	30.99	0.574	2.69	4.68	0.478	5.06	10.57	0.931	14.65	15.73	0.446	0.46	1.04	1.1366	49.9623	2	2	2	0	0	0	0	0	0	0	0	0	0	0	0	0	0	0	0	0	0	0	0	0	0	0	0	0	0	0	0
238	110524	1.306	50.88	38.96	1.18	6.34	5.37	0.994	12.49	12.56	1.524	32.05	21.03	0.848	0.96	1.13	1.1497	40.7124	2	2	2	0	0	0	0	0	0	0	0	0	0	0	0	0	0	0	0	0	0	0	0	0	0	0	0	0	0	0	0
239	110532	0.863	32.46	37.6	0.798	4.09	5.13	0.581	7.76	13.36	1.078	20.6	19.12	0.508	0.6	1.18	1.1523	45.4458	2	2	2	0	0	0	0	0	0	0	0	0	0	0	0	0	0	0	0	0	0	0	0	0	0	0	0	0	0	0	0
240	110538	1.177	42.86	36.42	1.15	6.62	5.76	0.834	9.66	11.58	1.393	26.57	19.08	0.734	0.87	1.19	1.1271	43.0149	2	2	2	0	0	0	0	0	0	0	0	0	0	0	0	0	0	0	0	0	0	0	0	0	0	0	0	0	0	0	0
241	110544	1.161	46.17	39.76	0.824	4.65	5.64	0.845	10.43	12.35	1.428	31.1	21.77	0.556	0.65	1.17	1.1443	43.6869	2	2	2	0	0	0	0	0	0	0	0	0	0	0	0	0	0	0	0	0	0	0	0	0	0	0	0	0	0	0	0
242	110548	1.104	32.4	29.36	0.835	4.04	4.83	0.805	8.1	10.06	1.401	20.27	14.47	0.688	0.91	1.32	1.145	45.0117	2	2	2	0	0	0	0	0	0	0	0	0	0	0	0	0	0	0	0	0	0	0	0	0	0	0	0	0	0	0	0
243	110558	0.693	21.1	30.46	0.644	2.7	4.2	0.477	4.03	8.45	0.807	14.37	17.82	0.519	0.55	1.05	1.1556	49.8214	2	2	2	0	0	0	0	0	0	0	0	0	0	0	0	0	0	0	0	0	0	0	0	0	0	0	0	0	0	0	0
244	110571	1.037	34.74	33.51	0.791	3.86	4.88	0.795	7.27	9.15	1.212	23.6	19.48	0.615	0.72	1.17	1.1532	45.418	2	2	2	0	0	0	0	0	0	0	0	0	0	0	0	0	0	0	0	0	0	0	0	0	0	0	0	0	0	0	0
245	110573	1.054	41.52	39.38	0.92	5.42	5.9	0.763	9.27	12.16	1.258	26.83	21.32	0.778	0.81	1.04	1.1373	48.9601	2	1	2	0	1	0	0	0	0	0	0	0	0	0	0	31	1	0	0	0	0	0	0	0	0	0	0	0	0	0	0
246	110575	0.991	42.59	42.96	0.859	4.9	5.71	0.719	10.27	14.29	1.194	27.42	22.97	0.488	0.57	1.17	1.1475	42.6443	2	2	2	0	0	0	0	0	0	0	0	0	0	0	0	0	0	0	0	0	0	0	0	0	0	0	0	0	0	0	0
247	110578	1.122	48.66	43.38	0.979	5.37	5.48	0.819	11.38	13.91	1.33	31.91	23.99	0.622	0.74	1.2	1.1324	46.8641	2	2	2	0	0	0	0	0	0	0	0	0	0	0	0	0	0	0	0	0	0	0	0	0	0	0	0	0	0	0	0
248	110586	1.021	39.94	39.11	0.842	4.54	5.39	0.807	9.91	12.28	1.189	25.49	21.44	0.601	0.7	1.16	1.1412	51.7822	2	2	2	0	0	0	0	0	0	0	0	0	0	0	0	0	0	0	0	0	0	0	0	0	0	0	0	0	0	0	0
249	110588	0.98	34.3	34.99	0.828	4.13	4.98	0.702	7.67	10.93	1.179	22.5	19.08	0.624	0.73	1.17	1.1378	49.9956	2	2	2	0	0	0	0	0	0	0	0	0	0	0	0	0	0	0	0	0	0	0	0	0	0	0	0	0	0	0	0
250	110597	0.988	37.13	37.58	0.895	4.55	5.09	0.729	7.61	10.43	1.132	24.97	22.06	0.593	0.69	1.16	1.1244	48.6888	2	1	1	0	2	1	0	0	0	0	0	0	0	0	0	6	1	0	19	1	0	0	0	0	0	0	0	0	0	0	0
251	110607	1.051	30.04	28.59	0.828	3.84	4.63	0.807	7.11	8.81	1.261	19.1	15.15	0.672	0.78	1.16	1.1371	49.5364	2	2	2	0	0	0	0	0	0	0	0	0	0	0	0	0	0	0	0	0	0	0	0	0	0	0	0	0	0	0	0
252	110608	1.077	45.44	42.17	0.688	3.46	5.04	0.87	11.53	13.26	1.275	30.44	23.88	0.467	0.55	1.19	1.1529	41.0802	2	1	2	0	1	0	0	0	0	0	0	0	0	0	0	10	1	0	0	0	0	0	0	0	0	0	0	0	0	0	0
253	110611	0.683	22.76	33.32	0.585	2.81	4.8	0.529	5.45	10.32	0.797	14.5	18.2	0.444	0.58	1.3	1.1405	53.2893	2	1	2	0	1	0	0	0	0	0	0	0	0	0	0	64	2	1	0	0	0	0	0	0	0	0	0	0	0	0	0
254	110613	0.932	32.98	35.38	0.76	3.88	5.1	0.686	8.98	13.09	1.171	20.12	17.18	0.537	0.62	1.16	1.1375	51.3986	2	2	2	0	0	0	0	0	0	0	0	0	0	0	0	0	0	0	0	0	0	0	0	0	0	0	0	0	0	0	0
255	110615	0.793	25.9	32.65	0.685	3.23	4.71	0.616	6.13	9.95	0.92	16.55	17.99	0.477	0.63	1.32	1.1518	45.1985	2	2	2	0	0	0	0	0	0	0	0	0	0	0	0	0	0	0	0	0	0	0	0	0	0	0	0	0	0	0	0
256	110617	0.986	39.56	40.13	0.753	4.33	5.75	0.796	10.32	12.96	1.163	24.92	21.42	0.482	0.56	1.16	1.1408	51.8356	2	2	2	0	0	0	0	0	0	0	0	0	0	0	0	0	0	0	0	0	0	0	0	0	0	0	0	0	0	0	0
257	110622	0.816	34.81	42.67	0.59	3.36	5.69	0.736	10.49	14.26	0.922	20.96	22.72	0.289	0.33	1.16	1.156	47.9229	2	2	2	0	0	0	0	0	0	0	0	0	0	0	0	0	0	0	0	0	0	0	0	0	0	0	0	0	0	0	0
258	110625	0.935	34.53	36.93	0.741	3.8	5.14	0.776	8.07	10.39	1.059	22.66	21.4	0.561	0.73	1.3	1.1337	46.1282	2	1	1	0	1	1	0	0	0	0	0	0	0	0	0	6	1	0	0	0	0	0	0	0	0	0	0	0	0	0	0
259	110629	0.483	16.76	34.67	0.422	2.08	4.94	0.379	4.23	11.17	0.562	10.44	18.56	0.332	0.43	1.3	1.1437	51.8929	2	2	2	0	0	0	0	0	0	0	0	0	0	0	0	0	0	0	0	0	0	0	0	0	0	0	0	0	0	0	0
260	110631	0.869	27.96	32.18	0.744	3.91	5.26	0.655	7.01	10.69	1.05	17.04	16.23	0.553	0.73	1.32	1.1488	45.5229	2	2	2	0	0	0	0	0	0	0	0	0	0	0	0	0	0	0	0	0	0	0	0	0	0	0	0	0	0	0	0
261	110638	1.047	45.81	43.76	0.889	4.57	5.15	0.75	8.98	11.97	1.211	32.26	26.65	0.708	0.82	1.16	1.129	39.6538	2	2	2	0	0	0	0	0	0	0	0	0	0	0	0	0	0	0	0	0	0	0	0	0	0	0	0	0	0	0	0
262	110639	1.159	47.53	41	1.021	5.64	5.53	0.887	10.4	11.73	1.326	31.48	23.74	0.702	0.76	1.08	1.1342	47.4884	2	2	2	0	0	0	0	0	0	0	0	0	0	0	0	0	0	0	0	0	0	0	0	0	0	0	0	0	0	0	0
263	110651	1.09	51.43	47.2	0.892	5.45	6.11	0.86	13.08	15.22	1.272	32.9	25.87	0.499	0.57	1.14	1.1274	45.6791	2	2	2	0	0	0	0	0	0	0	0	0	0	0	0	0	0	0	0	0	0	0	0	0	0	0	0	0	0	0	0
264	110662	0.871	27.46	31.51	0.722	3.51	4.86	0.808	7.58	9.38	0.948	16.37	17.27	0.383	0.45	1.17	1.1365	51.7069	2	2	2	0	0	0	0	0	0	0	0	0	0	0	0	0	0	0	0	0	0	0	0	0	0	0	0	0	0	0	0
265	110663	1.107	37.05	33.48	1.073	4.96	4.63	0.824	9.77	11.86	1.314	22.31	16.99	0.859	0.89	1.04	1.1307	52.9069	2	2	2	0	0	0	0	0	0	0	0	0	0	0	0	0	0	0	0	0	0	0	0	0	0	0	0	0	0	0	0
266	110665	0.99	32.24	32.57	0.847	3.85	4.55	0.759	6.76	8.9	1.131	21.63	19.12	0.586	0.61	1.04	1.1391	49.464	2	2	2	0	0	0	0	0	0	0	0	0	0	0	0	0	0	0	0	0	0	0	0	0	0	0	0	0	0	0	0
267	110672	0.993	35.34	35.59	0.769	3.82	4.96	0.686	8.36	12.19	1.256	23.16	18.43	0.633	0.67	1.05	1.1556	46.4826	2	2	2	0	0	0	0	0	0	0	0	0	0	0	0	0	0	0	0	0	0	0	0	0	0	0	0	0	0	0	0
268	110675	0.621	23.42	37.74	0.557	2.91	5.23	0.457	6.02	13.18	0.75	14.48	19.32	0.352	0.41	1.17	1.1493	47.2311	2	2	2	0	0	0	0	0	0	0	0	0	0	0	0	0	0	0	0	0	0	0	0	0	0	0	0	0	0	0	0
269	110687	1.366	56.43	41.3	1.159	6.79	5.86	1.136	12.59	11.09	1.521	37.05	24.35	1.268	1.64	1.3	1.154	41.6499	2	2	2	0	0	0	0	0	0	0	0	0	0	0	0	0	0	0	0	0	0	0	0	0	0	0	0	0	0	0	0
270	110690	1.016	39.6	38.99	0.802	4.77	5.95	0.664	8.14	12.26	1.285	26.69	20.77	0.782	0.81	1.03	1.1363	50.551	2	2	2	0	0	0	0	0	0	0	0	0	0	0	0	0	0	0	0	0	0	0	0	0	0	0	0	0	0	0	0
271	110698	0.722	22.44	31.06	0.564	2.72	4.83	0.487	5.21	10.71	0.935	14.5	15.52	0.342	0.4	1.17	1.1547	46.5887	2	2	2	0	0	0	0	0	0	0	0	0	0	0	0	0	0	0	0	0	0	0	0	0	0	0	0	0	0	0	0
272	110700	1.19	51.9	43.6	0.911	5.25	5.76	0.838	12.76	15.23	1.499	33.89	22.61	0.696	0.8	1.15	1.1384	46.7118	2	2	2	0	0	0	0	0	0	0	0	0	0	0	0	0	0	0	0	0	0	0	0	0	0	0	0	0	0	0	0
273	110703	1.164	51.2	43.99	0.955	5.05	5.29	0.864	11.04	12.78	1.355	35.11	25.91	0.748	0.86	1.15	1.1418	47.7788	2	2	2	0	0	0	0	0	0	0	0	0	0	0	0	0	0	0	0	0	0	0	0	0	0	0	0	0	0	0	0
274	110704	0.963	45.61	47.37	0.76	4.92	6.48	0.686	10.53	15.34	1.18	30.16	25.56	0.509	0.6	1.18	1.1348	51.9723	2	2	2	0	0	0	0	0	0	0	0	0	0	0	0	0	0	0	0	0	0	0	0	0	0	0	0	0	0	0	0
275	110706	0.876	34.14	38.96	0.782	4.27	5.47	0.626	7.61	12.16	1.043	22.25	21.33	0.443	0.48	1.09	1.132	48.4226	2	2	2	0	0	0	0	0	0	0	0	0	0	0	0	0	0	0	0	0	0	0	0	0	0	0	0	0	0	0	0
276	110709	0.986	41.8	42.39	0.808	4.58	5.67	0.746	9.43	12.63	1.154	27.79	24.09	0.47	0.52	1.11	1.1364	48.3612	2	2	2	0	0	0	0	0	0	0	0	0	0	0	0	0	0	0	0	0	0	0	0	0	0	0	0	0	0	0	0
277	110710	1.192	43.17	36.2	0.897	4.55	5.07	0.868	9.87	11.37	1.455	28.74	19.76	0.694	0.8	1.16	1.1374	48.8674	2	2	2	0	0	0	0	0	0	0	0	0	0	0	0	0	0	0	0	0	0	0	0	0	0	0	0	0	0	0	0
278	110712	0.847	24.05	28.4	0.685	2.85	4.17	0.63	6.4	10.17	1.052	14.8	14.06	0.616	0.74	1.19	1.1532	47.0462	2	2	2	0	0	0	0	0	0	0	0	0	0	0	0	0	0	0	0	0	0	0	0	0	0	0	0	0	0	0	0
279	110714	0.783	24.37	31.13	0.697	3.34	4.8	0.614	6.46	10.52	0.921	14.56	15.81	0.547	0.71	1.31	1.1401	53.5618	2	2	2	0	0	0	0	0	0	0	0	0	0	0	0	0	0	0	0	0	0	0	0	0	0	0	0	0	0	0	0
280	110715	0.881	34.5	39.15	0.677	3.73	5.51	0.712	7.88	11.07	1.014	22.88	22.57	0.522	0.68	1.3	1.1364	47.9963	2	2	2	0	0	0	0	0	0	0	0	0	0	0	0	0	0	0	0	0	0	0	0	0	0	0	0	0	0	0	0
281	110716	0.991	26.21	26.44	0.724	3.05	4.21	0.767	6.66	8.68	1.218	16.51	13.55	0.541	0.64	1.17	1.152	44.8698	2	2	2	0	0	0	0	0	0	0	0	0	0	0	0	0	0	0	0	0	0	0	0	0	0	0	0	0	0	0	0
282	110717	0.899	27.76	30.88	0.798	3.91	4.9	0.722	6.56	9.1	1.024	17.29	16.89	0.611	0.71	1.15	1.1471	50.3042	2	2	2	0	0	0	0	0	0	0	0	0	0	0	0	0	0	0	0	0	0	0	0	0	0	0	0	0	0	0	0
283	110723	0.917	37.37	40.74	0.775	4.13	5.34	0.648	8.5	13.13	1.111	24.73	22.27	0.433	0.49	1.14	1.1407	49.3449	2	1	2	0	2	0	0	0	0	0	0	0	0	0	0	12	1	0	14	1	0	0	0	0	0	0	0	0	0	0	0
284	110726	1.016	40.86	40.23	0.835	4.78	5.73	0.784	10.38	13.24	1.209	25.7	21.27	0.59	0.65	1.1	1.1561	46.1101	2	1	2	0	2	0	0	0	0	0	0	0	0	0	0	55	2	2	50	2	1	0	0	0	0	0	0	0	0	0	0
285	110728	0.787	33.81	42.98	0.655	3.62	5.53	0.553	7.92	14.32	0.963	22.28	23.13	0.314	0.36	1.16	1.1347	49.3272	2	2	2	0	0	0	0	0	0	0	0	0	0	0	0	0	0	0	0	0	0	0	0	0	0	0	0	0	0	0	0
286	110742	0.959	36.1	37.64	0.734	3.51	4.78	0.759	8.16	10.75	1.106	24.43	22.1	0.558	0.64	1.16	1.1532	47.0398	2	2	2	0	0	0	0	0	0	0	0	0	0	0	0	0	0	0	0	0	0	0	0	0	0	0	0	0	0	0	0
287	110744	0.851	35.05	41.19	0.598	3.6	6.02	0.678	8.89	13.11	1.023	22.56	22.06	0.375	0.39	1.04	1.1437	53.3889	2	2	2	0	0	0	0	0	0	0	0	0	0	0	0	0	0	0	0	0	0	0	0	0	0	0	0	0	0	0	0
288	110747	1.176	60.74	51.67	0.976	5.93	6.08	0.915	14.4	15.74	1.354	40.41	29.85	0.769	1	1.31	1.1346	48.5183	2	2	2	0	0	0	0	0	0	0	0	0	0	0	0	0	0	0	0	0	0	0	0	0	0	0	0	0	0	0	0
289	110751	0.875	27.9	31.87	0.649	3.01	4.63	0.611	6.64	10.87	1.115	18.25	16.36	0.372	0.41	1.12	1.1586	45.8559	2	1	2	0	1	0	0	0	0	0	0	0	0	0	0	42	1	0	0	0	0	0	0	0	0	0	0	0	0	0	0
290	110759	1.197	52.37	43.76	0.966	5.39	5.58	0.999	14.49	14.51	1.373	32.49	23.67	0.81	0.9	1.12	1.1541	42.9192	2	2	2	0	0	0	0	0	0	0	0	0	0	0	0	0	0	0	0	0	0	0	0	0	0	0	0	0	0	0	0
291	110762	1.074	54.2	50.47	0.879	5.19	5.9	0.758	11.11	14.66	1.267	37.9	29.91	0.6	0.63	1.04	1.1364	47.9096	2	2	2	0	0	0	0	0	0	0	0	0	0	0	0	0	0	0	0	0	0	0	0	0	0	0	0	0	0	0	0
292	110763	1.151	53.59	46.54	0.884	5.14	5.82	0.971	13.39	13.79	1.302	35.06	26.93	0.786	1.02	1.3	1.1516	42.3351	2	2	2	0	0	0	0	0	0	0	0	0	0	0	0	0	0	0	0	0	0	0	0	0	0	0	0	0	0	0	0
293	110765	0.932	27.14	29.12	0.835	3.81	4.57	0.728	7.4	10.17	1.107	15.92	14.38	0.705	0.8	1.13	1.145	44.7058	2	2	2	0	0	0	0	0	0	0	0	0	0	0	0	0	0	0	0	0	0	0	0	0	0	0	0	0	0	0	0
294	110770	1.09	43.96	40.33	0.873	4.55	5.22	0.827	10.16	12.29	1.281	29.24	22.82	0.56	0.64	1.14	1.1561	47.0028	2	2	2	0	0	0	0	0	0	0	0	0	0	0	0	0	0	0	0	0	0	0	0	0	0	0	0	0	0	0	0
295	110775	1.072	49.17	45.86	0.795	4.99	6.27	0.826	13.51	16.36	1.321	30.67	23.23	0.498	0.58	1.17	1.1468	42.0809	2	2	2	0	0	0	0	0	0	0	0	0	0	0	0	0	0	0	0	0	0	0	0	0	0	0	0	0	0	0	0
296	110776	0.706	19.42	27.53	0.539	2.47	4.59	0.543	4.59	8.44	0.853	12.36	14.5	0.323	0.36	1.12	1.1513	47.6712	2	2	2	0	0	0	0	0	0	0	0	0	0	0	0	0	0	0	0	0	0	0	0	0	0	0	0	0	0	0	0
297	110778	1.136	44.49	39.15	0.937	5.05	5.39	0.8	10.08	12.59	1.387	29.36	21.17	0.771	0.81	1.05	1.1435	41.6416	2	2	2	0	0	0	0	0	0	0	0	0	0	0	0	0	0	0	0	0	0	0	0	0	0	0	0	0	0	0	0
298	110779	0.695	22.47	32.31	0.513	2.81	5.48	0.524	5.08	9.69	0.851	14.58	17.14	0.283	0.33	1.16	1.1332	54.0385	2	2	2	0	0	0	0	0	0	0	0	0	0	0	0	0	0	0	0	0	0	0	0	0	0	0	0	0	0	0	0
299	110781	0.974	35.03	35.98	0.703	3.71	5.28	0.742	8.99	12.12	1.202	22.34	18.58	0.467	0.54	1.15	1.1442	41.8689	2	2	2	0	0	0	0	0	0	0	0	0	0	0	0	0	0	0	0	0	0	0	0	0	0	0	0	0	0	0	0
300	110791	0.604	19.56	32.41	0.5	2.35	4.69	0.452	4.76	10.53	0.725	12.45	17.18	0.394	0.51	1.31	1.1416	52.7621	2	2	2	0	0	0	0	0	0	0	0	0	0	0	0	0	0	0	0	0	0	0	0	0	0	0	0	0	0	0	0
301	110794	0.988	30.56	30.93	0.759	3.42	4.51	0.758	6.71	8.85	1.163	20.43	17.57	0.691	0.9	1.3	1.1501	43.6691	2	2	2	0	0	0	0	0	0	0	0	0	0	0	0	0	0	0	0	0	0	0	0	0	0	0	0	0	0	0	0
302	110796	0.972	30.69	31.58	0.773	4.02	5.2	0.702	6.55	9.34	1.18	20.12	17.04	0.549	0.6	1.1	1.1538	46.2956	2	2	2	0	0	0	0	0	0	0	0	0	0	0	0	0	0	0	0	0	0	0	0	0	0	0	0	0	0	0	0
303	110803	0.912	33.82	37.09	0.801	4.16	5.19	0.63	7.27	11.53	1.1	22.4	20.37	0.516	0.6	1.16	1.1433	55.6697	2	2	2	0	0	0	0	0	0	0	0	0	0	0	0	0	0	0	0	0	0	0	0	0	0	0	0	0	0	0	0
304	110805	0.823	24.46	29.71	0.648	3.11	4.79	0.601	5.96	9.91	1.026	15.39	15	0.393	0.44	1.12	1.1566	48.4056	2	2	2	0	0	0	0	0	0	0	0	0	0	0	0	0	0	0	0	0	0	0	0	0	0	0	0	0	0	0	0
305	110813	0.867	31.58	36.42	0.661	3.49	5.28	0.637	8.36	13.12	1.095	19.72	18.01	0.331	0.38	1.15	1.1385	48.3002	2	2	2	0	0	0	0	0	0	0	0	0	0	0	0	0	0	0	0	0	0	0	0	0	0	0	0	0	0	0	0
306	110820	0.934	38.56	41.28	0.663	3.42	5.17	0.697	7.69	11.05	1.095	27.45	25.06	0.414	0.49	1.19	1.1545	44.8054	2	2	2	0	0	0	0	0	0	0	0	0	0	0	0	0	0	0	0	0	0	0	0	0	0	0	0	0	0	0	0
307	110822	0.649	23.05	35.51	0.488	2.6	5.33	0.539	5.87	10.89	0.756	14.58	19.3	0.379	0.49	1.3	1.14	50.1961	2	2	2	0	0	0	0	0	0	0	0	0	0	0	0	0	0	0	0	0	0	0	0	0	0	0	0	0	0	0	0
308	110833	0.76	23.72	31.21	0.587	2.77	4.72	0.623	5.63	9.05	0.878	15.32	17.44	0.431	0.57	1.32	1.1477	45.7269	2	2	2	0	0	0	0	0	0	0	0	0	0	0	0	0	0	0	0	0	0	0	0	0	0	0	0	0	0	0	0
309	110835	0.884	26.66	30.15	0.775	3.66	4.72	0.704	6.38	9.07	1.016	16.62	16.36	0.608	0.68	1.12	1.1342	48.252	2	2	2	0	0	0	0	0	0	0	0	0	0	0	0	0	0	0	0	0	0	0	0	0	0	0	0	0	0	0	0
310	110841	1.077	38.09	35.35	0.879	4.06	4.62	0.803	7.87	9.8	1.25	26.16	20.93	0.865	1.13	1.3	1.1247	46.89	2	1	2	0	2	0	0	0	0	0	0	0	0	0	0	15	1	0	25	1	0	0	0	0	0	0	0	0	0	0	0
311	110842	0.978	32.42	33.17	0.713	3.17	4.44	0.678	6.96	10.26	1.208	22.3	18.46	0.596	0.77	1.3	1.1568	47.903	2	2	2	0	0	0	0	0	0	0	0	0	0	0	0	0	0	0	0	0	0	0	0	0	0	0	0	0	0	0	0
312	110849	0.839	34.92	41.62	0.687	3.98	5.79	0.618	8.16	13.21	1.007	22.78	22.62	0.318	0.37	1.16	1.1456	51.3341	2	1	2	0	2	0	0	0	0	0	0	0	0	0	0	26	1	0	32	1	0	0	0	0	0	0	0	0	0	0	0
313	110852	1.182	42.24	35.73	0.993	4.98	5.02	0.892	11.25	12.62	1.438	26.01	18.09	0.834	0.96	1.15	1.1378	47.5255	2	2	2	0	0	0	0	0	0	0	0	0	0	0	0	0	0	0	0	0	0	0	0	0	0	0	0	0	0	0	0
314	110859	1.14	56.83	49.87	0.921	5.56	6.04	0.821	12.45	15.17	1.354	38.83	28.67	0.604	0.72	1.18	1.1402	39.738	2	2	2	0	0	0	0	0	0	0	0	0	0	0	0	0	0	0	0	0	0	0	0	0	0	0	0	0	0	0	0
315	110861	0.77	23.47	30.47	0.646	3.32	5.14	0.554	5.59	10.1	0.956	14.56	15.23	0.45	0.52	1.16	1.1391	50.8456	2	2	2	0	0	0	0	0	0	0	0	0	0	0	0	0	0	0	0	0	0	0	0	0	0	0	0	0	0	0	0
316	110867	0.894	40.57	45.39	0.723	4.06	5.63	0.612	8.32	13.59	1.077	28.18	26.17	0.469	0.52	1.12	1.1399	49.0892	2	2	2	0	0	0	0	0	0	0	0	0	0	0	0	0	0	0	0	0	0	0	0	0	0	0	0	0	0	0	0
317	110870	1.079	39.59	36.69	0.901	4.91	5.45	0.798	10.51	13.18	1.338	24.16	18.05	0.646	0.75	1.16	1.1403	47.7981	2	2	2	0	0	0	0	0	0	0	0	0	0	0	0	0	0	0	0	0	0	0	0	0	0	0	0	0	0	0	0
318	110872	0.795	24.48	30.8	0.773	3.14	4.06	0.553	6.36	11.49	0.983	14.99	15.25	0.537	0.62	1.15	1.1438	53.558	2	2	2	0	0	0	0	0	0	0	0	0	0	0	0	0	0	0	0	0	0	0	0	0	0	0	0	0	0	0	0
319	110875	0.913	39.71	43.51	0.655	3.6	5.5	0.647	8.81	13.61	1.119	27.3	24.4	0.385	0.43	1.12	1.135	48.191	2	2	2	0	0	0	0	0	0	0	0	0	0	0	0	0	0	0	0	0	0	0	0	0	0	0	0	0	0	0	0
320	110876	1.169	56.48	48.32	1.003	5.5	5.48	0.954	15.01	15.74	1.327	35.98	27.11	0.798	0.83	1.04	1.1573	44.8666	2	2	2	0	0	0	0	0	0	0	0	0	0	0	0	0	0	0	0	0	0	0	0	0	0	0	0	0	0	0	0
321	110879	0.923	37.1	40.18	0.779	4.18	5.36	0.608	6.61	10.88	1.099	26.31	23.94	0.639	0.83	1.3	1.1342	47.4847	2	1	2	0	1	0	0	0	0	0	0	0	0	0	0	44	1	0	0	0	0	0	0	0	0	0	0	0	0	0	0
322	110884	0.82	34.82	42.45	0.697	4.01	5.75	0.738	9.26	12.55	0.892	21.55	24.15	0.466	0.48	1.04	1.1453	50.7083	2	2	2	0	0	0	0	0	0	0	0	0	0	0	0	0	0	0	0	0	0	0	0	0	0	0	0	0	0	0	0
323	110886	0.945	40.52	42.87	0.719	4.11	5.72	0.672	8.38	12.47	1.136	28.02	24.68	0.358	0.41	1.14	1.1332	46.9007	2	2	2	0	0	0	0	0	0	0	0	0	0	0	0	0	0	0	0	0	0	0	0	0	0	0	0	0	0	0	0
324	110897	1.113	39.88	35.83	0.932	4.69	5.04	0.768	10.02	13.06	1.419	25.16	17.74	0.922	1.2	1.3	1.1553	45.2662	2	2	2	0	0	0	0	0	0	0	0	0	0	0	0	0	0	0	0	0	0	0	0	0	0	0	0	0	0	0	0
325	110906	1.043	31.54	30.24	0.91	4.2	4.62	0.808	8.86	10.96	1.261	18.48	14.65	0.906	0.94	1.04	1.1379	53.6875	2	2	2	0	0	0	0	0	0	0	0	0	0	0	0	0	0	0	0	0	0	0	0	0	0	0	0	0	0	0	0
326	110909	0.926	29.83	32.21	0.789	3.76	4.77	0.688	7.44	10.8	1.12	18.63	16.64	0.584	0.71	1.22	1.148	44.2962	2	2	2	0	0	0	0	0	0	0	0	0	0	0	0	0	0	0	0	0	0	0	0	0	0	0	0	0	0	0	0
327	110915	0.817	25.45	31.14	0.704	3.21	4.56	0.592	6.29	10.63	1	15.94	15.94	0.437	0.48	1.1	1.1362	51.6061	2	2	2	0	0	0	0	0	0	0	0	0	0	0	0	0	0	0	0	0	0	0	0	0	0	0	0	0	0	0	0
328	110918	0.99	49.25	49.72	0.765	4.74	6.2	0.668	10.66	15.97	1.229	33.85	27.55	0.518	0.61	1.17	1.1456	42.6523	2	2	2	0	0	0	0	0	0	0	0	0	0	0	0	0	0	0	0	0	0	0	0	0	0	0	0	0	0	0	0
329	110920	0.898	24.1	26.83	0.762	3.03	3.97	0.621	5.23	8.42	1.097	15.84	14.44	0.54	0.62	1.16	1.154	45.5764	2	2	2	0	0	0	0	0	0	0	0	0	0	0	0	0	0	0	0	0	0	0	0	0	0	0	0	0	0	0	0
330	110924	1.102	46.4	42.11	1.037	5.92	5.71	0.75	10.04	13.39	1.323	30.44	23.01	0.725	0.81	1.12	1.1372	48.7202	2	2	2	0	0	0	0	0	0	0	0	0	0	0	0	0	0	0	0	0	0	0	0	0	0	0	0	0	0	0	0
331	110925	0.939	45.41	48.35	0.751	4.21	5.61	0.753	10.72	14.23	1.069	30.48	28.51	0.435	0.51	1.17	1.1496	43.8312	2	2	2	0	0	0	0	0	0	0	0	0	0	0	0	0	0	0	0	0	0	0	0	0	0	0	0	0	0	0	0
332	110929	0.895	42.07	47	0.746	4.44	5.95	0.663	10.35	15.61	1.073	27.28	25.44	0.449	0.51	1.14	1.1325	48.1578	2	2	2	0	0	0	0	0	0	0	0	0	0	0	0	0	0	0	0	0	0	0	0	0	0	0	0	0	0	0	0
333	110935	1.02	33.91	33.25	0.753	3.99	5.29	0.699	7.14	10.21	1.284	22.79	17.75	0.561	0.64	1.14	1.14	46.3523	2	2	2	0	0	0	0	0	0	0	0	0	0	0	0	0	0	0	0	0	0	0	0	0	0	0	0	0	0	0	0
334	110936	1.074	65.47	60.97	0.865	5.85	6.76	0.856	13.78	16.1	1.203	45.83	38.1	0.427	0.47	1.1	1.136	48.125	2	2	2	0	0	0	0	0	0	0	0	0	0	0	0	0	0	0	0	0	0	0	0	0	0	0	0	0	0	0	0
335	110941	0.748	26.64	35.6	0.629	2.87	4.57	0.557	6.37	11.43	0.888	17.4	19.59	0.459	0.56	1.22	1.1391	50.3878	2	2	2	0	0	0	0	0	0	0	0	0	0	0	0	0	0	0	0	0	0	0	0	0	0	0	0	0	0	0	0
336	110942	0.723	22.65	31.34	0.614	2.79	4.54	0.455	4.99	10.97	0.939	14.87	15.83	0.486	0.64	1.32	1.1496	46.044	2	2	2	0	0	0	0	0	0	0	0	0	0	0	0	0	0	0	0	0	0	0	0	0	0	0	0	0	0	0	0
337	110944	1.08	50.28	46.58	0.843	5.14	6.1	0.788	14.38	18.26	1.385	30.76	22.22	0.755	0.98	1.3	1.135	46.4454	2	2	2	0	0	0	0	0	0	0	0	0	0	0	0	0	0	0	0	0	0	0	0	0	0	0	0	0	0	0	0
338	110952	0.985	45.66	46.34	0.698	4.05	5.81	0.831	12.75	15.34	1.146	28.86	25.2	0.402	0.45	1.12	1.156	45.0943	2	1	2	0	1	0	0	0	0	0	0	0	0	0	0	4	1	0	0	0	0	0	0	0	0	0	0	0	0	0	0
339	110953	0.681	18.86	27.7	0.574	2.72	4.73	0.516	4.14	8.02	0.803	12	14.94	0.319	0.34	1.07	1.1549	48.649	2	2	2	0	0	0	0	0	0	0	0	0	0	0	0	0	0	0	0	0	0	0	0	0	0	0	0	0	0	0	0
340	110959	1.254	43.75	34.9	1.049	5.44	5.19	0.906	10.1	11.15	1.52	28.2	18.56	0.807	0.95	1.17	1.1395	40.8289	2	2	2	0	0	0	0	0	0	0	0	0	0	0	0	0	0	0	0	0	0	0	0	0	0	0	0	0	0	0	0
341	110961	1.052	39.29	37.34	0.859	4.57	5.32	0.796	9.25	11.63	1.249	25.47	20.39	0.665	0.76	1.15	1.1515	44.776	2	2	2	0	0	0	0	0	0	0	0	0	0	0	0	0	0	0	0	0	0	0	0	0	0	0	0	0	0	0	0
342	110971	1.055	48.91	46.36	0.847	4.89	5.77	0.698	10.18	14.57	1.301	33.84	26.01	0.598	0.69	1.16	1.1354	45.6054	2	2	2	0	0	0	0	0	0	0	0	0	0	0	0	0	0	0	0	0	0	0	0	0	0	0	0	0	0	0	0
343	110973	0.732	21.58	29.47	0.612	3.01	4.91	0.599	6.99	11.67	0.899	11.58	12.88	0.464	0.55	1.18	1.1586	47.1429	2	2	2	0	0	0	0	0	0	0	0	0	0	0	0	0	0	0	0	0	0	0	0	0	0	0	0	0	0	0	0
344	110975	1.103	39.31	35.65	0.911	4.52	4.96	0.854	10.04	11.76	1.308	24.75	18.92	0.838	0.88	1.05	1.1478	45.3351	2	2	2	0	0	0	0	0	0	0	0	0	0	0	0	0	0	0	0	0	0	0	0	0	0	0	0	0	0	0	0
345	110979	1.117	36.84	32.97	0.889	4.31	4.85	0.805	8.74	10.87	1.379	23.78	17.25	0.805	1.04	1.3	1.1323	45.8686	2	2	2	0	0	0	0	0	0	0	0	0	0	0	0	0	0	0	0	0	0	0	0	0	0	0	0	0	0	0	0
346	110986	0.774	42.99	55.53	0.144	0.16	1.11	0.856	33.78	39.46	0.606	9.06	14.95	0	0	0	1.1432	43.6855	2	1	2	0	2	0	0	0	0	0	0	0	0	0	0	10	1	0	30	1	0	0	0	0	0	0	0	0	0	0	0
347	110987	0.842	33.29	39.52	0.808	3.96	4.91	0.712	8.42	11.82	0.917	20.91	22.8	0.694	0.91	1.31	1.136	50.7706	2	2	2	0	0	0	0	0	0	0	0	0	0	0	0	0	0	0	0	0	0	0	0	0	0	0	0	0	0	0	0
348	110993	0.918	39.44	42.97	0.711	4.14	5.83	0.613	8.15	13.29	1.138	27.14	23.85	0.468	0.54	1.15	1.1421	48.7089	2	2	2	0	0	0	0	0	0	0	0	0	0	0	0	0	0	0	0	0	0	0	0	0	0	0	0	0	0	0	0
349	110996	1.15	46.97	40.83	0.963	4.85	5.04	0.921	11.29	12.25	1.309	30.83	23.55	0.666	0.76	1.14	1.1493	45.4442	2	2	2	0	0	0	0	0	0	0	0	0	0	0	0	0	0	0	0	0	0	0	0	0	0	0	0	0	0	0	0
350	111006	0.978	43.13	44.09	0.818	4.41	5.4	0.729	10.35	14.2	1.158	28.37	24.49	0.392	0.46	1.17	1.1536	43.6791	2	2	2	0	0	0	0	0	0	0	0	0	0	0	0	0	0	0	0	0	0	0	0	0	0	0	0	0	0	0	0
351	111008	0.858	30.54	35.61	0.712	3.58	5.03	0.656	8.18	12.47	1.037	18.79	18.11	0.432	0.5	1.16	1.1553	47.6471	2	2	2	0	0	0	0	0	0	0	0	0	0	0	0	0	0	0	0	0	0	0	0	0	0	0	0	0	0	0	0
352	111012	0.811	27.69	34.13	0.654	3.3	5.05	0.616	7.03	11.4	0.982	17.36	17.69	0.54	0.7	1.3	1.158	47.1102	2	2	2	0	0	0	0	0	0	0	0	0	0	0	0	0	0	0	0	0	0	0	0	0	0	0	0	0	0	0	0
353	111014	1.11	34.67	31.22	0.975	4.29	4.4	0.931	9.52	10.22	1.256	20.86	16.61	0.755	0.84	1.11	1.1348	43.1344	2	2	2	0	0	0	0	0	0	0	0	0	0	0	0	0	0	0	0	0	0	0	0	0	0	0	0	0	0	0	0
354	111018	0.916	43.66	47.67	0.719	4.07	5.66	0.734	10.46	14.26	1.05	29.13	27.75	0.436	0.51	1.17	1.1378	49.505	2	2	2	0	0	0	0	0	0	0	0	0	0	0	0	0	0	0	0	0	0	0	0	0	0	0	0	0	0	0	0
355	111021	1.162	52.07	44.81	0.944	5.23	5.54	0.963	13.12	13.63	1.315	33.73	25.64	0.845	1.1	1.3	1.1353	47.7134	2	2	2	0	0	0	0	0	0	0	0	0	0	0	0	0	0	0	0	0	0	0	0	0	0	0	0	0	0	0	0
356	111023	0.961	33	34.35	0.825	4.01	4.87	0.747	6.98	9.35	1.093	22	20.14	0.704	0.92	1.31	1.1349	50.1647	2	2	2	0	0	0	0	0	0	0	0	0	0	0	0	0	0	0	0	0	0	0	0	0	0	0	0	0	0	0	0
357	111036	0.893	38.05	42.62	0.79	4.41	5.59	0.658	8.62	13.1	1.046	25.02	23.93	0.347	0.39	1.12	1.1378	47.6481	2	2	1	0	0	1	0	0	0	0	0	0	0	0	0	0	0	0	0	0	0	0	0	0	0	0	0	0	0	0	0
358	111043	0.86	36.09	41.96	0.687	4.18	6.08	0.628	7.72	12.29	1.025	24.18	23.59	0.49	0.51	1.04	1.1407	54.3881	2	2	2	0	0	0	0	0	0	0	0	0	0	0	0	0	0	0	0	0	0	0	0	0	0	0	0	0	0	0	0
359	111046	1.137	37.89	33.31	1.039	4.87	4.68	0.793	8.03	10.12	1.351	24.99	18.5	0.83	0.89	1.08	1.1298	44.5484	2	2	2	0	0	0	0	0	0	0	0	0	0	0	0	0	0	0	0	0	0	0	0	0	0	0	0	0	0	0	0
360	111047	0.804	31.72	39.46	0.674	3.37	5	0.571	7.29	12.76	0.971	21.06	21.69	0.398	0.44	1.1	1.164	49.2095	2	2	2	0	0	0	0	0	0	0	0	0	0	0	0	0	0	0	0	0	0	0	0	0	0	0	0	0	0	0	0
361	111054	1.066	36.94	34.64	0.835	4.29	5.13	0.838	8.51	10.16	1.248	24.14	19.35	0.62	0.73	1.18	1.1376	49.6922	2	2	2	0	0	0	0	0	0	0	0	0	0	0	0	0	0	0	0	0	0	0	0	0	0	0	0	0	0	0	0
362	111062	0.95	41.47	43.67	0.881	4.89	5.55	0.737	10.68	14.49	1.096	25.9	23.63	0.544	0.64	1.17	1.1437	50.9346	2	2	2	0	0	0	0	0	0	0	0	0	0	0	0	0	0	0	0	0	0	0	0	0	0	0	0	0	0	0	0
363	111063	0.785	28.35	36.11	0.623	3.02	4.85	0.608	6.13	10.09	0.907	19.2	21.17	0.508	0.67	1.32	1.1512	45.4928	2	2	2	0	0	0	0	0	0	0	0	0	0	0	0	0	0	0	0	0	0	0	0	0	0	0	0	0	0	0	0
364	111067	0.616	22.95	37.26	0.425	2.05	4.82	0.49	6.01	12.27	0.739	14.89	20.16	0.246	0.28	1.16	1.1577	47.0599	2	2	2	0	0	0	0	0	0	0	0	0	0	0	0	0	0	0	0	0	0	0	0	0	0	0	0	0	0	0	0
365	111075	1.164	51.4	44.17	0.932	4.92	5.28	0.943	13	13.78	1.334	33.47	25.1	0.621	0.7	1.13	1.1366	46.2833	2	2	2	0	0	0	0	0	0	0	0	0	0	0	0	0	0	0	0	0	0	0	0	0	0	0	0	0	0	0	0
366	111077	0.861	27.37	31.8	0.654	3.14	4.79	0.609	6.73	11.05	1.097	17.5	15.96	0.394	0.46	1.17	1.1626	45.651	2	2	2	0	0	0	0	0	0	0	0	0	0	0	0	0	0	0	0	0	0	0	0	0	0	0	0	0	0	0	0
367	111078	0.789	30.06	38.09	0.662	3.27	4.94	0.561	6.48	11.54	0.94	20.31	21.61	0.515	0.68	1.32	1.1528	45.301	2	2	2	0	0	0	0	0	0	0	0	0	0	0	0	0	0	0	0	0	0	0	0	0	0	0	0	0	0	0	0
368	111081	1.045	49.13	47.02	0.908	5.18	5.7	0.778	11.66	14.98	1.226	32.29	26.33	0.703	0.91	1.3	1.1458	50.6684	2	2	2	0	0	0	0	0	0	0	0	0	0	0	0	0	0	0	0	0	0	0	0	0	0	0	0	0	0	0	0
369	111092	0.913	38.24	41.89	0.762	3.9	5.12	0.68	9.2	13.53	1.082	25.15	23.25	0.431	0.5	1.16	1.1318	45.5165	2	2	2	0	0	0	0	0	0	0	0	0	0	0	0	0	0	0	0	0	0	0	0	0	0	0	0	0	0	0	0
370	111095	0.786	25.42	32.33	0.665	3.56	5.36	0.632	6.88	10.88	0.931	14.98	16.09	0.435	0.5	1.16	1.1619	47.373	2	2	2	0	0	0	0	0	0	0	0	0	0	0	0	0	0	0	0	0	0	0	0	0	0	0	0	0	0	0	0
371	111097	0.742	41.44	55.82	0.552	3.61	6.54	0.416	7.2	17.31	0.958	30.62	31.97	0.436	0.57	1.3	1.1422	49.3946	2	2	2	0	0	0	0	0	0	0	0	0	0	0	0	0	0	0	0	0	0	0	0	0	0	0	0	0	0	0	0
372	111102	0.902	39.69	44.02	0.771	4.84	6.28	0.688	9.2	13.38	1.053	25.65	24.36	0.66	0.77	1.17	1.1411	42.308	2	1	2	0	1	0	0	0	0	0	0	0	0	0	0	10	1	0	0	0	0	0	0	0	0	0	0	0	0	0	0
373	111115	0.83	36.56	44.02	0.679	3.78	5.57	0.617	8.09	13.12	0.975	24.68	25.33	0.366	0.41	1.12	1.1411	49.6395	2	2	2	0	0	0	0	0	0	0	0	0	0	0	0	0	0	0	0	0	0	0	0	0	0	0	0	0	0	0	0
374	111117	1.035	36.21	35	0.91	4.53	4.97	0.717	6.79	9.47	1.211	24.89	20.55	0.813	1.06	1.3	1.1243	48.6243	2	1	2	0	3	0	0	0	0	0	0	0	0	0	0	8	1	0	22	1	0	31	1	0	0	0	0	0	0	0	0
375	111123	1.058	53.88	50.94	0.722	4.63	6.41	0.925	14.15	15.3	1.201	35.11	29.23	0.618	0.81	1.32	1.1452	43.1587	1	2	2	1	0	0	50	2	3	0	0	0	0	0	0	0	0	0	0	0	0	0	0	0	0	0	0	0	0	0	0
376	111136	1.073	42.71	39.81	0.881	5.07	5.76	0.806	10.47	12.98	1.29	27.17	21.07	0.625	0.69	1.11	1.1629	47.1164	2	2	2	0	0	0	0	0	0	0	0	0	0	0	0	0	0	0	0	0	0	0	0	0	0	0	0	0	0	0	0
377	111140	0.679	25.82	38.01	0.53	2.88	5.43	0.535	6.49	12.13	0.805	16.45	20.44	0.296	0.35	1.17	1.1482	45.3244	2	1	1	0	1	1	0	0	0	0	0	0	0	0	0	99999	2	1	0	0	0	0	0	0	0	0	0	0	0	0	0
378	111143	0.843	39.55	46.91	0.884	5.22	5.91	0.649	9.33	14.37	0.939	24.99	26.63	0.58	0.64	1.1	1.136	49.297	2	2	2	0	0	0	0	0	0	0	0	0	0	0	0	0	0	0	0	0	0	0	0	0	0	0	0	0	0	0	0
379	111144	0.863	41.33	47.9	0.695	4.06	5.85	0.571	7.63	13.37	1.033	29.64	28.69	0.343	0.41	1.19	1.1353	48.6078	2	2	2	0	0	0	0	0	0	0	0	0	0	0	0	0	0	0	0	0	0	0	0	0	0	0	0	0	0	0	0
380	111159	0.714	20.26	28.36	0.677	2.79	4.13	0.571	5.41	9.48	0.817	12.05	14.76	0.445	0.59	1.32	1.148	44.9652	2	2	2	0	0	0	0	0	0	0	0	0	0	0	0	0	0	0	0	0	0	0	0	0	0	0	0	0	0	0	0
381	111164	1.02	42.98	42.16	0.762	4.69	6.15	0.761	9.82	12.9	1.232	28.47	23.11	0.539	0.56	1.04	1.1538	44.9364	2	1	2	0	1	0	0	0	0	0	0	0	0	0	0	10	1	0	0	0	0	0	0	0	0	0	0	0	0	0	0
382	111173	0.719	23.74	33.03	0.583	2.88	4.93	0.569	5.83	10.24	0.842	15.04	17.87	0.409	0.47	1.16	1.1338	56.3656	2	2	2	0	0	0	0	0	0	0	0	0	0	0	0	0	0	0	0	0	0	0	0	0	0	0	0	0	0	0	0
383	111178	0.765	27.15	35.5	0.566	2.91	5.14	0.615	6.25	10.16	0.891	18	20.2	0.44	0.57	1.3	1.1577	48.2394	2	2	1	0	0	1	0	0	0	0	0	0	0	0	0	0	0	0	0	0	0	0	0	0	0	0	0	0	0	0	0
384	111183	0.838	28.32	33.79	0.76	3.18	4.18	0.656	6.9	10.51	0.956	18.25	19.1	0.563	0.66	1.17	1.1577	47.902	2	2	2	0	0	0	0	0	0	0	0	0	0	0	0	0	0	0	0	0	0	0	0	0	0	0	0	0	0	0	0
385	111185	0.872	32.91	37.76	0.64	3.45	5.39	0.645	9.29	14.4	1.122	20.17	17.97	0.357	0.4	1.12	1.1554	45.4947	2	2	2	0	0	0	0	0	0	0	0	0	0	0	0	0	0	0	0	0	0	0	0	0	0	0	0	0	0	0	0
386	111188	1.084	53.64	49.49	0.858	5.82	6.77	0.864	11.71	13.55	1.238	36.11	29.17	0.571	0.59	1.04	1.1323	46.4952	2	2	2	0	0	0	0	0	0	0	0	0	0	0	0	0	0	0	0	0	0	0	0	0	0	0	0	0	0	0	0
387	111190	0.646	20.68	32	0.533	2.68	5.03	0.477	4.43	9.27	0.767	13.57	17.69	0.331	0.38	1.13	1.1548	48.5671	2	2	2	0	0	0	0	0	0	0	0	0	0	0	0	0	0	0	0	0	0	0	0	0	0	0	0	0	0	0	0
388	111192	1.005	39.5	39.3	0.756	3.88	5.14	0.757	9.41	12.44	1.206	26.2	21.72	0.525	0.61	1.16	1.1564	44.7105	2	2	2	0	0	0	0	0	0	0	0	0	0	0	0	0	0	0	0	0	0	0	0	0	0	0	0	0	0	0	0
389	111194	0.745	22.41	30.07	0.595	2.68	4.5	0.569	5.56	9.78	0.897	14.17	15.79	0.369	0.43	1.16	1.1619	47.695	2	2	2	0	0	0	0	0	0	0	0	0	0	0	0	0	0	0	0	0	0	0	0	0	0	0	0	0	0	0	0
390	111196	0.876	29.65	33.84	0.795	3.54	4.45	0.728	7.52	10.33	0.976	18.59	19.06	0.445	0.5	1.12	1.1389	49.215	2	2	2	0	0	0	0	0	0	0	0	0	0	0	0	0	0	0	0	0	0	0	0	0	0	0	0	0	0	0	0
391	111198	1.157	37.94	32.79	1.006	4.89	4.86	0.902	8.95	9.92	1.338	24.1	18.01	0.903	1.03	1.15	1.1375	43.1441	1	2	1	1	0	1	55	2	2	0	0	0	0	0	0	0	0	0	0	0	0	0	0	0	0	0	0	0	0	0	0
392	111201	1.135	50.89	44.83	0.991	5.88	5.93	0.836	10.78	12.89	1.317	34.24	26	0.77	0.87	1.13	1.142	48.3311	2	2	2	0	0	0	0	0	0	0	0	0	0	0	0	0	0	0	0	0	0	0	0	0	0	0	0	0	0	0	0
393	111203	1.113	36.96	33.2	0.909	4.62	5.08	0.827	8.79	10.63	1.347	23.55	17.49	0.836	0.87	1.04	1.1386	48.0087	2	2	2	0	0	0	0	0	0	0	0	0	0	0	0	0	0	0	0	0	0	0	0	0	0	0	0	0	0	0	0
394	111206	1.125	55.9	49.71	0.987	5.83	5.91	0.911	14.91	16.36	1.281	35.15	27.43	0.684	0.8	1.17	1.1396	48.8899	2	2	2	0	0	0	0	0	0	0	0	0	0	0	0	0	0	0	0	0	0	0	0	0	0	0	0	0	0	0	0
395	111207	0.858	33.91	39.51	0.655	3.69	5.63	0.654	8.29	12.67	1.034	21.93	21.21	0.553	0.72	1.3	1.1584	46.3968	2	2	2	0	0	0	0	0	0	0	0	0	0	0	0	0	0	0	0	0	0	0	0	0	0	0	0	0	0	0	0
396	111210	0.88	29.81	33.86	0.762	3.1	4.06	0.655	7.65	11.69	1.053	19.06	18.11	0.521	0.61	1.17	1.1437	42.5535	2	2	2	0	0	0	0	0	0	0	0	0	0	0	0	0	0	0	0	0	0	0	0	0	0	0	0	0	0	0	0
397	111215	0.98	41.18	42	0.829	4.59	5.53	0.782	10.85	13.87	1.139	25.74	22.59	0.557	0.61	1.09	1.1369	52.5842	2	2	2	0	0	0	0	0	0	0	0	0	0	0	0	0	0	0	0	0	0	0	0	0	0	0	0	0	0	0	0
398	111216	1.035	49.75	48.06	0.879	5.58	6.34	0.745	12.4	16.65	1.268	31.77	25.06	0.602	0.67	1.12	1.1353	47.6113	2	2	2	0	0	0	0	0	0	0	0	0	0	0	0	0	0	0	0	0	0	0	0	0	0	0	0	0	0	0	0
399	111221	1.025	55.86	54.5	0.84	5.05	6.02	0.745	11.59	15.56	1.191	39.21	32.92	0.51	0.57	1.12	1.1528	44.263	2	2	2	0	0	0	0	0	0	0	0	0	0	0	0	0	0	0	0	0	0	0	0	0	0	0	0	0	0	0	0
400	111222	0.886	28.49	32.14	0.748	3.29	4.4	0.599	5.46	9.12	1.06	19.73	18.63	0.631	0.73	1.16	1.1341	49.8218	2	2	2	0	0	0	0	0	0	0	0	0	0	0	0	0	0	0	0	0	0	0	0	0	0	0	0	0	0	0	0
401	111229	0.958	41.8	43.63	0.799	4.78	5.98	0.786	10.43	13.28	1.091	26.58	24.37	0.507	0.57	1.13	1.1489	43.0231	2	2	2	0	0	0	0	0	0	0	0	0	0	0	0	0	0	0	0	0	0	0	0	0	0	0	0	0	0	0	0
402	111232	0.827	24.66	29.83	0.641	2.98	4.64	0.645	6.38	9.89	1	15.3	15.3	0.488	0.63	1.3	1.1536	48.4408	2	2	2	0	0	0	0	0	0	0	0	0	0	0	0	0	0	0	0	0	0	0	0	0	0	0	0	0	0	0	0
403	111234	0.819	29.6	36.13	0.635	3.2	5.05	0.614	7.35	11.96	0.996	19.04	19.13	0.363	0.42	1.16	1.1401	48.3266	2	2	2	0	0	0	0	0	0	0	0	0	0	0	0	0	0	0	0	0	0	0	0	0	0	0	0	0	0	0	0
404	111240	1.104	44.87	40.64	0.937	5.27	5.62	0.83	10.3	12.41	1.296	29.31	22.62	0.86	1.12	1.3	1.1327	50.7435	2	2	2	0	0	0	0	0	0	0	0	0	0	0	0	0	0	0	0	0	0	0	0	0	0	0	0	0	0	0	0
405	111245	0.807	24.86	30.82	0.732	3.6	4.92	0.632	7.03	11.12	0.963	14.23	14.78	0.439	0.51	1.16	1.1441	44.4904	2	2	2	0	0	0	0	0	0	0	0	0	0	0	0	0	0	0	0	0	0	0	0	0	0	0	0	0	0	0	0
406	111246	1.111	46.83	42.15	0.819	4.48	5.48	0.793	9.23	11.65	1.323	33.11	25.02	0.557	0.64	1.16	1.1526	45.5763	2	2	2	0	0	0	0	0	0	0	0	0	0	0	0	0	0	0	0	0	0	0	0	0	0	0	0	0	0	0	0
407	111247	0.897	34.98	39	0.715	3.98	5.57	0.685	8.48	12.37	1.069	22.52	21.07	0.459	0.51	1.11	1.1575	48.1493	2	2	2	0	0	0	0	0	0	0	0	0	0	0	0	0	0	0	0	0	0	0	0	0	0	0	0	0	0	0	0
408	111250	0.864	28.37	32.84	0.758	3.8	5.02	0.727	7.32	10.07	0.971	17.24	17.76	0.558	0.65	1.17	1.1407	51.5428	2	1	2	0	1	0	0	0	0	0	0	0	0	0	0	40	1	0	0	0	0	0	0	0	0	0	0	0	0	0	0
409	111253	1.097	46.63	42.51	0.891	4.83	5.43	0.811	11.43	14.1	1.321	30.36	22.98	0.668	0.87	1.3	1.1522	44.3017	2	2	2	0	0	0	0	0	0	0	0	0	0	0	0	0	0	0	0	0	0	0	0	0	0	0	0	0	0	0	0
410	111255	0.762	39.25	51.53	0.628	3.58	5.7	0.639	8.36	13.08	0.834	27.31	32.75	0.403	0.47	1.17	1.1515	47.5619	2	2	2	0	0	0	0	0	0	0	0	0	0	0	0	0	0	0	0	0	0	0	0	0	0	0	0	0	0	0	0
411	111256	1.086	29.82	27.47	0.902	4.12	4.57	0.839	7.67	9.14	1.31	18.03	13.76	0.764	0.9	1.17	1.1498	45.1169	2	2	2	0	0	0	0	0	0	0	0	0	0	0	0	0	0	0	0	0	0	0	0	0	0	0	0	0	0	0	0
412	111257	1.039	51.66	49.71	0.782	4.5	5.75	0.79	13.57	17.18	1.254	33.59	26.78	0.455	0.53	1.17	1.1283	49.2114	2	2	2	0	0	0	0	0	0	0	0	0	0	0	0	0	0	0	0	0	0	0	0	0	0	0	0	0	0	0	0
413	111262	0.84	24.41	29.08	0.697	3.07	4.41	0.607	5.38	8.87	1.01	15.96	15.8	0.507	0.56	1.11	1.1302	47.0859	2	1	2	0	2	0	0	0	0	0	0	0	0	0	0	61	2	1	66	2	1	0	0	0	0	0	0	0	0	0	0
414	111263	0.859	39.72	46.26	0.665	3.78	5.69	0.709	9.14	12.89	0.968	26.8	27.68	0.393	0.45	1.14	1.1562	45.8322	2	2	2	0	0	0	0	0	0	0	0	0	0	0	0	0	0	0	0	0	0	0	0	0	0	0	0	0	0	0	0
415	111268	0.895	41.25	46.07	0.691	4.37	6.32	0.616	11.22	18.2	1.191	25.66	21.55	0.608	0.79	1.3	1.1592	48.676	2	2	2	0	0	0	0	0	0	0	0	0	0	0	0	0	0	0	0	0	0	0	0	0	0	0	0	0	0	0	0
416	111281	0.829	44.12	53.21	0.683	4.2	6.14	0.701	9.82	14.02	0.911	30.1	33.04	0.3	0.35	1.16	1.1558	42.6673	2	2	2	0	0	0	0	0	0	0	0	0	0	0	0	0	0	0	0	0	0	0	0	0	0	0	0	0	0	0	0
417	111284	0.962	37.96	39.48	0.781	4.02	5.15	0.706	8.89	12.6	1.153	25.05	21.73	0.611	0.71	1.17	1.1556	44.0466	2	2	2	0	0	0	0	0	0	0	0	0	0	0	0	0	0	0	0	0	0	0	0	0	0	0	0	0	0	0	0
418	111287	1.138	43.96	38.64	0.887	5.18	5.84	0.82	9.6	11.72	1.384	29.17	21.09	0.676	0.77	1.14	1.1495	45.0018	2	1	2	0	2	0	0	0	0	0	0	0	0	0	0	18	1	0	18	1	0	0	0	0	0	0	0	0	0	0	0
419	111288	1.279	53.98	42.19	1.113	6.27	5.64	0.945	12.21	12.91	1.501	35.5	23.65	0.832	0.98	1.17	1.1314	49.6305	2	2	2	0	0	0	0	0	0	0	0	0	0	0	0	0	0	0	0	0	0	0	0	0	0	0	0	0	0	0	0
420	111290	0.645	18.52	28.7	0.577	2.88	4.99	0.526	5.27	10.03	0.758	10.37	13.68	0.44	0.46	1.03	1.1445	53.5485	2	2	2	0	0	0	0	0	0	0	0	0	0	0	0	0	0	0	0	0	0	0	0	0	0	0	0	0	0	0	0
421	111297	0.9	39.78	44.19	0.74	4.51	6.1	0.718	10.69	14.89	1.06	24.58	23.19	0.405	0.46	1.14	1.1326	45.9005	2	2	2	0	0	0	0	0	0	0	0	0	0	0	0	0	0	0	0	0	0	0	0	0	0	0	0	0	0	0	0
422	111299	1.068	34.73	32.51	0.809	3.93	4.85	0.869	9.07	10.44	1.262	21.73	17.22	0.65	0.84	1.3	1.1561	44.7809	2	2	2	0	0	0	0	0	0	0	0	0	0	0	0	0	0	0	0	0	0	0	0	0	0	0	0	0	0	0	0
423	111304	0.847	39.18	46.27	0.676	4.04	5.98	0.613	8.45	13.78	1.007	26.69	26.51	0.404	0.48	1.18	1.1398	49.8333	2	2	2	0	0	0	0	0	0	0	0	0	0	0	0	0	0	0	0	0	0	0	0	0	0	0	0	0	0	0	0
424	111308	1.084	35.13	32.41	0.919	4.22	4.59	0.796	8.15	10.24	1.294	22.75	17.58	0.675	0.74	1.1	1.1269	49.5671	2	1	2	0	3	0	0	0	0	0	0	0	0	0	0	11	1	0	13	1	0	32	1	0	0	0	0	0	0	0	0
425	111311	0.976	32.93	33.74	0.818	3.64	4.45	0.726	7.71	10.62	1.156	21.58	18.67	0.636	0.66	1.04	1.1336	49.5849	2	2	2	0	0	0	0	0	0	0	0	0	0	0	0	0	0	0	0	0	0	0	0	0	0	0	0	0	0	0	0
426	111315	0.966	32.79	33.93	0.82	3.94	4.81	0.778	7.69	9.88	1.1	21.16	19.24	0.6	0.69	1.14	1.1349	51.1116	2	2	2	0	0	0	0	0	0	0	0	0	0	0	0	0	0	0	0	0	0	0	0	0	0	0	0	0	0	0	0
427	111322	0.877	29.19	33.28	0.673	3.27	4.85	0.657	8.82	13.43	1.14	17.1	15	0.617	0.72	1.17	1.1497	46.6072	2	2	2	0	0	0	0	0	0	0	0	0	0	0	0	0	0	0	0	0	0	0	0	0	0	0	0	0	0	0	0
428	111324	0.911	39.53	43.41	0.73	4.39	6.02	0.692	9.51	13.75	1.084	25.63	23.64	0.412	0.48	1.17	1.1333	48.0358	2	2	2	0	0	0	0	0	0	0	0	0	0	0	0	0	0	0	0	0	0	0	0	0	0	0	0	0	0	0	0
429	111326	0.875	26.99	30.85	0.906	3.74	4.13	0.681	6.55	9.62	0.977	16.7	17.1	0.713	0.74	1.04	1.138	52.0048	2	2	2	0	0	0	0	0	0	0	0	0	0	0	0	0	0	0	0	0	0	0	0	0	0	0	0	0	0	0	0
430	111328	1.248	60.07	48.13	1.006	5.78	5.74	1.003	16.36	16.31	1.455	37.93	26.07	0.81	0.84	1.04	1.1367	47.3908	2	2	2	0	0	0	0	0	0	0	0	0	0	0	0	0	0	0	0	0	0	0	0	0	0	0	0	0	0	0	0
431	111329	0.952	34.4	36.12	0.751	3.66	4.87	0.719	6.97	9.69	1.102	23.77	21.56	0.493	0.58	1.17	1.1325	47.0612	2	2	2	0	0	0	0	0	0	0	0	0	0	0	0	0	0	0	0	0	0	0	0	0	0	0	0	0	0	0	0
432	111332	0.815	29.5	36.19	0.675	3.49	5.18	0.597	7.09	11.89	0.989	18.92	19.13	0.462	0.53	1.15	1.1373	49.6626	2	2	2	0	0	0	0	0	0	0	0	0	0	0	0	0	0	0	0	0	0	0	0	0	0	0	0	0	0	0	0
433	111335	1.027	29.97	29.17	0.98	3.84	3.92	0.762	6.22	8.17	1.165	19.91	17.09	0.68	0.74	1.08	1.1371	50.0419	2	2	2	0	0	0	0	0	0	0	0	0	0	0	0	0	0	0	0	0	0	0	0	0	0	0	0	0	0	0	0
434	111336	1.17	60.69	51.87	0.896	5.6	6.25	0.892	13.39	15.02	1.363	41.7	30.6	0.607	0.63	1.04	1.1366	50.2959	2	2	2	0	0	0	0	0	0	0	0	0	0	0	0	0	0	0	0	0	0	0	0	0	0	0	0	0	0	0	0
435	111337	0.675	21.93	32.52	0.63	2.82	4.48	0.468	4.99	10.67	0.813	14.12	17.37	0.367	0.43	1.16	1.1483	55.1656	2	2	2	0	0	0	0	0	0	0	0	0	0	0	0	0	0	0	0	0	0	0	0	0	0	0	0	0	0	0	0
436	111338	1.081	42.3	39.13	0.96	5.16	5.37	0.783	10.1	12.9	1.297	27.04	20.85	0.731	0.81	1.11	1.1311	48.5195	2	2	2	0	0	0	0	0	0	0	0	0	0	0	0	0	0	0	0	0	0	0	0	0	0	0	0	0	0	0	0
437	111350	1.228	58.05	47.29	1.123	6.32	5.63	0.803	10.89	13.57	1.454	40.83	28.09	0.814	0.91	1.12	1.1595	45.9682	2	2	2	0	0	0	0	0	0	0	0	0	0	0	0	0	0	0	0	0	0	0	0	0	0	0	0	0	0	0	0
438	111352	0.727	21.5	29.57	0.54	2.5	4.64	0.549	5.51	10.04	0.906	13.48	14.88	0.342	0.4	1.17	1.1536	56.1601	2	2	2	0	0	0	0	0	0	0	0	0	0	0	0	0	0	0	0	0	0	0	0	0	0	0	0	0	0	0	0
439	111354	1.117	43.82	39.25	0.836	4.92	5.88	0.904	10.3	11.39	1.302	28.6	21.97	0.731	0.96	1.32	1.1419	42.3944	2	2	2	0	0	0	0	0	0	0	0	0	0	0	0	0	0	0	0	0	0	0	0	0	0	0	0	0	0	0	0
440	111355	0.981	29.85	30.43	0.858	4.07	4.75	0.687	6.47	9.41	1.187	19.31	16.27	0.636	0.72	1.13	1.1368	48.5007	2	2	2	0	0	0	0	0	0	0	0	0	0	0	0	0	0	0	0	0	0	0	0	0	0	0	0	0	0	0	0
441	111357	0.831	30.51	36.7	0.629	3.31	5.27	0.611	7.19	11.77	1.017	20	19.67	0.686	0.71	1.04	1.1568	44.5728	1	2	2	1	0	0	49	1	0	0	0	0	0	0	0	0	0	0	0	0	0	0	0	0	0	0	0	0	0	0	0
442	111360	0.928	43.95	47.36	0.822	5.1	6.21	0.643	9.75	15.16	1.12	29.1	25.99	0.527	0.61	1.17	1.1276	42.9637	2	2	2	0	0	0	0	0	0	0	0	0	0	0	0	0	0	0	0	0	0	0	0	0	0	0	0	0	0	0	0
443	111363	0.933	44.09	47.24	0.757	4.63	6.12	0.489	7.75	15.85	1.255	31.71	25.27	0.565	0.59	1.04	1.1279	47.0488	2	2	2	0	0	0	0	0	0	0	0	0	0	0	0	0	0	0	0	0	0	0	0	0	0	0	0	0	0	0	0
444	111364	1.241	52.7	42.47	1.101	6.14	5.58	0.897	11.39	12.7	1.454	35.17	24.18	0.968	1.26	1.3	1.1306	44.569	2	2	2	0	0	0	0	0	0	0	0	0	0	0	0	0	0	0	0	0	0	0	0	0	0	0	0	0	0	0	0
445	111367	0.948	33.92	35.76	0.864	4.12	4.77	0.681	7.62	11.2	1.12	22.18	19.8	0.6	0.67	1.11	1.13	51.0164	2	2	2	0	0	0	0	0	0	0	0	0	0	0	0	0	0	0	0	0	0	0	0	0	0	0	0	0	0	0	0
446	111382	0.947	42.14	44.48	0.703	4.18	5.94	0.726	10.39	14.31	1.138	27.58	24.23	0.488	0.55	1.14	1.1543	41.6542	2	2	2	0	0	0	0	0	0	0	0	0	0	0	0	0	0	0	0	0	0	0	0	0	0	0	0	0	0	0	0
447	111385	0.843	25.33	30.03	0.668	2.98	4.46	0.639	6.02	9.43	1.011	16.33	16.14	0.468	0.48	1.04	1.1361	48.1359	2	2	2	0	0	0	0	0	0	0	0	0	0	0	0	0	0	0	0	0	0	0	0	0	0	0	0	0	0	0	0
448	111402	1.007	34.75	34.52	0.832	4.42	5.31	0.714	7.78	10.9	1.232	22.54	18.3	0.684	0.71	1.03	1.1442	52.1397	2	2	2	0	0	0	0	0	0	0	0	0	0	0	0	0	0	0	0	0	0	0	0	0	0	0	0	0	0	0	0
449	111411	0.856	28.45	33.25	0.754	3.33	4.42	0.599	5.36	8.94	0.994	19.76	19.89	0.508	0.57	1.12	1.1372	53.9264	2	2	1	0	0	1	0	0	0	0	0	0	0	0	0	0	0	0	0	0	0	0	0	0	0	0	0	0	0	0	0
450	111417	0.851	32.64	38.33	0.725	4.08	5.63	0.652	7.54	11.56	0.994	21.01	21.14	0.593	0.77	1.3	1.132	48.571	2	2	2	0	0	0	0	0	0	0	0	0	0	0	0	0	0	0	0	0	0	0	0	0	0	0	0	0	0	0	0
451	111422	1.161	55.58	47.89	0.868	5.49	6.32	0.907	12.45	13.72	1.352	37.65	27.85	0.585	0.72	1.23	1.1498	43.8782	2	1	2	0	1	0	0	0	0	0	0	0	0	0	0	25	1	0	0	0	0	0	0	0	0	0	0	0	0	0	0
452	111424	1.169	41.8	35.76	0.888	4.55	5.13	0.887	9.38	10.58	1.39	27.87	20.05	0.758	0.82	1.08	1.1339	46.5312	2	2	2	0	0	0	0	0	0	0	0	0	0	0	0	0	0	0	0	0	0	0	0	0	0	0	0	0	0	0	0
453	111427	0.8	29.04	36.32	0.671	3.31	4.94	0.549	7.14	13	1.012	18.6	18.38	0.429	0.51	1.19	1.1355	49.1736	2	2	2	0	0	0	0	0	0	0	0	0	0	0	0	0	0	0	0	0	0	0	0	0	0	0	0	0	0	0	0
454	111433	0.974	37.45	38.45	0.751	3.95	5.26	0.687	7.48	10.89	1.167	26.02	22.3	0.481	0.56	1.16	1.1535	47.0194	2	2	2	0	0	0	0	0	0	0	0	0	0	0	0	0	0	0	0	0	0	0	0	0	0	0	0	0	0	0	0
455	111434	0.787	23.58	29.97	0.571	2.62	4.6	0.582	5.07	8.72	0.954	15.88	16.65	0.286	0.33	1.15	1.1462	41.2765	2	2	2	0	0	0	0	0	0	0	0	0	0	0	0	0	0	0	0	0	0	0	0	0	0	0	0	0	0	0	0
456	111439	1.147	53.4	46.56	0.952	5.71	6	0.859	14.3	16.64	1.396	33.39	23.92	0.499	0.59	1.17	1.1354	50.0755	2	2	2	0	0	0	0	0	0	0	0	0	0	0	0	0	0	0	0	0	0	0	0	0	0	0	0	0	0	0	0
457	111441	0.954	39.76	41.7	0.7	4.14	5.92	0.715	9.81	13.73	1.17	25.81	22.05	0.499	0.58	1.16	1.1544	46.3818	2	1	2	0	1	0	0	0	0	0	0	0	0	0	0	15	1	0	0	0	0	0	0	0	0	0	0	0	0	0	0
458	111442	1.109	54.5	49.17	0.925	5.46	5.9	0.87	12.85	14.77	1.27	36.19	28.49	0.512	0.59	1.14	1.1389	48.4478	2	2	2	0	0	0	0	0	0	0	0	0	0	0	0	0	0	0	0	0	0	0	0	0	0	0	0	0	0	0	0
459	111443	0.989	47.06	47.6	0.752	4.22	5.62	0.773	11.79	15.25	1.162	31.05	26.73	0.639	0.66	1.04	1.1539	44.7202	2	2	2	0	0	0	0	0	0	0	0	0	0	0	0	0	0	0	0	0	0	0	0	0	0	0	0	0	0	0	0
460	111444	0.929	32.97	35.47	0.706	3.63	5.15	0.647	6.99	10.81	1.145	22.34	19.52	0.413	0.46	1.1	1.1385	44.3654	2	2	2	0	0	0	0	0	0	0	0	0	0	0	0	0	0	0	0	0	0	0	0	0	0	0	0	0	0	0	0
461	111448	0.828	36.34	43.87	0.602	3.35	5.56	0.602	8.12	13.49	1.002	24.87	24.81	0.543	0.7	1.3	1.1348	47.6022	2	2	2	0	0	0	0	0	0	0	0	0	0	0	0	0	0	0	0	0	0	0	0	0	0	0	0	0	0	0	0
462	111449	0.744	30.47	40.95	0.533	2.88	5.41	0.583	8.47	14.52	0.909	19.11	21.02	0.44	0.57	1.3	1.1358	49.2367	2	2	1	0	0	3	0	0	0	0	0	0	0	0	0	0	0	0	0	0	0	0	0	0	0	0	0	0	0	0	0
463	111452	0.681	27.8	40.79	0.569	2.78	4.88	0.45	5.25	11.68	0.816	19.77	24.23	0.35	0.4	1.16	1.1573	47.5508	2	2	2	0	0	0	0	0	0	0	0	0	0	0	0	0	0	0	0	0	0	0	0	0	0	0	0	0	0	0	0
464	111455	0.958	36.54	38.13	0.819	4.88	5.96	0.735	8.32	11.32	1.119	23.34	20.85	0.611	0.79	1.3	1.1549	46.5685	2	2	2	0	0	0	0	0	0	0	0	0	0	0	0	0	0	0	0	0	0	0	0	0	0	0	0	0	0	0	0
465	111459	1.011	47.62	47.12	0.88	5.28	6	0.699	11.24	16.07	1.242	31.1	25.05	0.484	0.53	1.1	1.1343	48.2409	2	2	2	0	0	0	0	0	0	0	0	0	0	0	0	0	0	0	0	0	0	0	0	0	0	0	0	0	0	0	0
466	111463	1.017	42.38	41.67	0.818	4.42	5.4	0.759	10.46	13.79	1.224	27.5	22.47	0.44	0.48	1.09	1.1398	48.2739	2	1	2	0	1	0	0	0	0	0	0	0	0	0	0	15	1	0	0	0	0	0	0	0	0	0	0	0	0	0	0
467	111493	1.139	38.25	33.6	0.948	4.75	5.01	0.895	9.56	10.69	1.337	23.94	17.9	0.608	0.69	1.13	1.1412	43.7441	2	2	2	0	0	0	0	0	0	0	0	0	0	0	0	0	0	0	0	0	0	0	0	0	0	0	0	0	0	0	0
468	111494	1.144	52.05	45.49	0.983	5.05	5.14	0.903	21.02	23.28	1.522	25.98	17.08	1.206	1.13	0.93	1.1574	41.1814	2	1	2	0	1	0	0	0	0	0	0	0	0	0	0	42	1	0	0	0	0	0	0	0	0	0	0	0	0	0	0
469	111500	0.831	25.87	31.14	0.713	3.63	5.1	0.623	6	9.63	0.99	16.24	16.41	0.631	0.83	1.32	1.1467	46.4177	2	2	2	0	0	0	0	0	0	0	0	0	0	0	0	0	0	0	0	0	0	0	0	0	0	0	0	0	0	0	0
470	111501	1.112	51.86	46.62	0.898	5.8	6.46	0.854	11.07	12.96	1.286	34.99	27.2	0.593	0.69	1.16	1.1302	52.0115	2	2	2	0	0	0	0	0	0	0	0	0	0	0	0	0	0	0	0	0	0	0	0	0	0	0	0	0	0	0	0
471	111507	0.86	34	39.55	0.784	3.78	4.82	0.583	8.15	13.99	1.064	22.06	20.73	0.484	0.54	1.11	1.1537	47.0419	2	2	2	0	0	0	0	0	0	0	0	0	0	0	0	0	0	0	0	0	0	0	0	0	0	0	0	0	0	0	0
472	111513	1.138	49.73	43.68	0.973	5.03	5.17	0.862	12.57	14.59	1.343	32.12	23.92	0.789	0.82	1.04	1.1565	44.6603	2	2	1	0	0	1	0	0	0	0	0	0	0	0	0	0	0	0	0	0	0	0	0	0	0	0	0	0	0	0	0
473	111514	0.753	24.28	32.25	0.602	2.82	4.68	0.532	5.74	10.8	0.938	15.72	16.77	0.369	0.43	1.16	1.1421	48.9568	2	1	2	0	1	0	0	0	0	0	0	0	0	0	0	62	2	1	0	0	0	0	0	0	0	0	0	0	0	0	0
474	111516	1.026	41.6	40.57	0.807	4.18	5.18	0.866	9.46	10.94	1.143	27.96	24.45	0.574	0.65	1.14	1.1304	46.1789	2	2	2	0	0	0	0	0	0	0	0	0	0	0	0	0	0	0	0	0	0	0	0	0	0	0	0	0	0	0	0
475	111523	1.019	30.12	29.56	0.714	3.24	4.53	0.708	7.04	9.95	1.316	19.84	15.08	0.443	0.53	1.2	1.1575	45.1589	2	2	2	0	0	0	0	0	0	0	0	0	0	0	0	0	0	0	0	0	0	0	0	0	0	0	0	0	0	0	0
476	111525	0.989	40.38	40.82	0.805	4.18	5.2	0.728	9.46	13	1.182	26.73	22.62	0.505	0.59	1.17	1.1581	47.946	2	2	2	0	0	0	0	0	0	0	0	0	0	0	0	0	0	0	0	0	0	0	0	0	0	0	0	0	0	0	0
477	111542	1.076	41.5	38.59	0.987	5.21	5.27	0.763	9.83	12.88	1.296	26.47	20.43	0.879	1.14	1.3	1.1392	48.935	1	2	2	1	0	0	51	2	9	0	0	0	0	0	0	0	0	0	0	0	0	0	0	0	0	0	0	0	0	0	0
478	111546	0.982	38.17	38.86	0.855	4.88	5.71	0.731	10.21	13.97	1.204	23.08	19.18	0.568	0.68	1.2	1.1345	47.4051	2	1	2	0	1	0	0	0	0	0	0	0	0	0	0	21	1	0	0	0	0	0	0	0	0	0	0	0	0	0	0
479	111548	1.016	44.34	43.66	0.748	4.4	5.88	0.748	9.53	12.73	1.214	30.41	25.04	0.604	0.78	1.3	1.1518	44.5858	2	2	2	0	0	0	0	0	0	0	0	0	0	0	0	0	0	0	0	0	0	0	0	0	0	0	0	0	0	0	0
480	111550	0.799	26.22	32.81	0.596	2.81	4.71	0.65	8.32	12.8	0.987	15.09	15.3	0.416	0.49	1.17	1.1423	51.5395	2	2	2	0	0	0	0	0	0	0	0	0	0	0	0	0	0	0	0	0	0	0	0	0	0	0	0	0	0	0	0
481	111554	1.056	47.35	44.82	0.798	4.19	5.25	0.802	11.79	14.69	1.261	31.37	24.88	0.576	0.68	1.17	1.151	44.8679	2	2	2	0	0	0	0	0	0	0	0	0	0	0	0	0	0	0	0	0	0	0	0	0	0	0	0	0	0	0	0
482	111558	0.998	46.27	46.34	0.893	5.96	6.68	0.791	11.71	14.81	1.15	28.59	24.86	0.646	0.78	1.22	1.1444	45.7322	2	2	2	0	0	0	0	0	0	0	0	0	0	0	0	0	0	0	0	0	0	0	0	0	0	0	0	0	0	0	0
483	111560	0.97	37.01	38.16	0.838	4.41	5.26	0.688	8.94	13	1.189	23.65	19.9	0.616	0.68	1.11	1.1299	50.1275	2	2	2	0	0	0	0	0	0	0	0	0	0	0	0	0	0	0	0	0	0	0	0	0	0	0	0	0	0	0	0
484	111571	0.781	25.16	32.23	0.657	3.28	4.99	0.574	5.94	10.35	0.944	15.94	16.9	0.499	0.56	1.13	1.15	45.534	2	2	2	0	0	0	0	0	0	0	0	0	0	0	0	0	0	0	0	0	0	0	0	0	0	0	0	0	0	0	0
485	111574	1.104	42.45	38.43	0.886	3.46	3.9	0.893	11.5	12.87	1.269	27.49	21.66	0.57	0.65	1.13	1.1508	41.3505	2	2	2	0	0	0	0	0	0	0	0	0	0	0	0	0	0	0	0	0	0	0	0	0	0	0	0	0	0	0	0
486	111579	0.778	33.04	42.47	0.609	3.38	5.54	0.639	8.45	13.22	0.895	21.21	23.71	0.41	0.42	1.04	1.1331	48.7541	2	2	1	0	0	1	0	0	0	0	0	0	0	0	0	0	0	0	0	0	0	0	0	0	0	0	0	0	0	0	0
487	111604	0.737	27.94	37.89	0.484	2.77	5.72	0.521	7.2	13.81	0.979	17.98	18.36	0.364	0.42	1.15	1.1484	43.7726	2	2	2	0	0	0	0	0	0	0	0	0	0	0	0	0	0	0	0	0	0	0	0	0	0	0	0	0	0	0	0
488	111610	0.842	33.56	39.84	0.752	4.11	5.47	0.614	8.02	13.07	1.006	21.43	21.31	0.424	0.49	1.16	1.1551	47.1786	2	2	2	0	0	0	0	0	0	0	0	0	0	0	0	0	0	0	0	0	0	0	0	0	0	0	0	0	0	0	0
489	111617	1.097	42.24	38.5	0.883	4.75	5.39	0.841	9.14	10.86	1.274	28.35	22.25	0.577	0.66	1.14	1.1332	53.4697	2	2	2	0	0	0	0	0	0	0	0	0	0	0	0	0	0	0	0	0	0	0	0	0	0	0	0	0	0	0	0
490	111621	1.061	43.93	41.41	0.8	4.3	5.37	0.826	11.53	13.96	1.273	28.1	22.08	0.53	0.59	1.11	1.1531	45.8739	2	2	2	0	0	0	0	0	0	0	0	0	0	0	0	0	0	0	0	0	0	0	0	0	0	0	0	0	0	0	0
491	111629	0.725	30.04	41.45	0.626	3.57	5.7	0.499	6.01	12.05	0.863	20.46	23.7	0.317	0.35	1.09	1.149	46.9639	2	2	2	0	0	0	0	0	0	0	0	0	0	0	0	0	0	0	0	0	0	0	0	0	0	0	0	0	0	0	0
492	111632	1.184	47.28	39.93	0.953	5.3	5.57	0.876	11.02	12.58	1.421	30.96	21.78	0.763	0.84	1.1	1.1444	41.8603	2	2	2	0	0	0	0	0	0	0	0	0	0	0	0	0	0	0	0	0	0	0	0	0	0	0	0	0	0	0	0
493	111635	0.754	38.66	51.28	0.747	4.46	5.98	0.638	9.86	15.45	0.815	24.33	29.85	0.414	0.48	1.16	1.1372	50.9826	2	2	2	0	0	0	0	0	0	0	0	0	0	0	0	0	0	0	0	0	0	0	0	0	0	0	0	0	0	0	0
494	111639	1.047	47.76	45.6	0.75	4.06	5.42	0.81	10.56	13.03	1.221	33.14	27.15	0.462	0.54	1.17	1.1499	44.1026	2	2	2	0	0	0	0	0	0	0	0	0	0	0	0	0	0	0	0	0	0	0	0	0	0	0	0	0	0	0	0
495	111640	1.215	47.67	39.24	1.112	6.15	5.53	0.945	10.69	11.31	1.376	30.83	22.4	0.713	0.83	1.16	1.128	50.3379	2	2	2	0	0	0	0	0	0	0	0	0	0	0	0	0	0	0	0	0	0	0	0	0	0	0	0	0	0	0	0
496	111641	0.889	27.91	31.4	0.8	3.77	4.71	0.658	5.83	8.86	1.028	18.31	17.82	0.514	0.56	1.1	1.1595	46.739	1	2	2	1	0	0	62	2	3	0	0	0	0	0	0	0	0	0	0	0	0	0	0	0	0	0	0	0	0	0	0
497	111643	0.885	43.93	49.66	0.89	5.48	6.16	0.774	11.46	14.82	0.941	26.99	28.69	0.516	0.57	1.1	1.1377	49.6276	2	1	2	0	1	0	0	0	0	0	0	0	0	0	0	60	2	2	0	0	0	0	0	0	0	0	0	0	0	0	0
498	111647	0.749	32.51	43.39	0.651	3.65	5.61	0.558	8.87	15.89	0.913	19.99	21.89	0.359	0.37	1.04	1.1383	50.7484	2	2	2	0	0	0	0	0	0	0	0	0	0	0	0	0	0	0	0	0	0	0	0	0	0	0	0	0	0	0	0
499	111649	1.111	41.31	37.19	0.922	4.57	4.95	0.757	7.98	10.55	1.327	28.76	21.68	0.654	0.72	1.1	1.1579	48.0147	2	2	2	0	0	0	0	0	0	0	0	0	0	0	0	0	0	0	0	0	0	0	0	0	0	0	0	0	0	0	0
500	111655	0.916	30.81	33.63	0.825	4.08	4.94	0.686	8.05	11.73	1.102	18.68	16.95	0.642	0.67	1.04	1.1604	49.4069	2	2	2	0	0	0	0	0	0	0	0	0	0	0	0	0	0	0	0	0	0	0	0	0	0	0	0	0	0	0	0
501	111656	0.71	21.79	30.68	0.619	2.99	4.83	0.572	5.34	9.33	0.815	13.46	16.51	0.347	0.41	1.17	1.1524	48.14	2	2	2	0	0	0	0	0	0	0	0	0	0	0	0	0	0	0	0	0	0	0	0	0	0	0	0	0	0	0	0
502	111658	0.836	26.34	31.5	0.683	3.42	5.01	0.616	6.11	9.92	1.014	16.81	16.57	0.548	0.72	1.32	1.1459	45.7979	2	2	2	0	0	0	0	0	0	0	0	0	0	0	0	0	0	0	0	0	0	0	0	0	0	0	0	0	0	0	0
503	111660	0.858	27.1	31.59	0.757	3.82	5.04	0.613	5.49	8.96	1.011	17.79	17.59	0.644	0.74	1.16	1.1371	50.6848	2	2	2	0	0	0	0	0	0	0	0	0	0	0	0	0	0	0	0	0	0	0	0	0	0	0	0	0	0	0	0
504	111664	0.893	37.38	41.87	0.876	4.94	5.64	0.663	9.72	14.66	1.053	22.72	21.57	0.793	1.03	1.3	1.1332	43.7935	2	2	2	0	0	0	0	0	0	0	0	0	0	0	0	0	0	0	0	0	0	0	0	0	0	0	0	0	0	0	0
505	111668	1.456	59.75	41.03	1.243	6.99	5.63	1.224	15.87	12.97	1.644	36.88	22.44	0.831	0.99	1.19	1.1447	37.7655	2	2	2	0	0	0	0	0	0	0	0	0	0	0	0	0	0	0	0	0	0	0	0	0	0	0	0	0	0	0	0
506	111698	0.845	30.4	35.95	0.656	3.38	5.16	0.671	6.59	9.82	0.974	20.42	20.98	0.397	0.47	1.19	1.1374	50.7494	2	2	2	0	0	0	0	0	0	0	0	0	0	0	0	0	0	0	0	0	0	0	0	0	0	0	0	0	0	0	0
507	111704	0.821	24.19	29.45	0.687	3.19	4.65	0.594	5.5	9.26	0.997	15.5	15.54	0.586	0.61	1.04	1.1543	46.875	2	2	2	0	0	0	0	0	0	0	0	0	0	0	0	0	0	0	0	0	0	0	0	0	0	0	0	0	0	0	0
508	111707	1.071	42.8	39.96	0.852	4.6	5.4	0.826	9.49	11.49	1.244	28.7	23.07	0.465	0.53	1.13	1.1421	42.1833	2	2	2	0	0	0	0	0	0	0	0	0	0	0	0	0	0	0	0	0	0	0	0	0	0	0	0	0	0	0	0
509	111712	1.047	40.73	38.89	0.827	4.35	5.26	0.801	10.39	12.97	1.258	25.99	20.67	0.505	0.56	1.12	1.1325	46.079	2	1	1	0	2	1	0	0	0	0	0	0	0	0	0	25	1	0	40	1	0	0	0	0	0	0	0	0	0	0	0
510	111716	0.844	27.91	33.06	0.78	3.54	4.53	0.586	6.01	10.26	1.005	18.36	18.27	0.593	0.65	1.1	1.1576	47.9106	2	2	2	0	0	0	0	0	0	0	0	0	0	0	0	0	0	0	0	0	0	0	0	0	0	0	0	0	0	0	0
511	111717	0.816	24.41	29.92	0.752	3.13	4.17	0.651	5.82	8.94	0.919	15.46	16.82	0.535	0.61	1.14	1.1472	53.6692	2	2	2	0	0	0	0	0	0	0	0	0	0	0	0	0	0	0	0	0	0	0	0	0	0	0	0	0	0	0	0
512	111737	1.237	48	38.8	1.099	5.57	5.06	1.055	20.33	19.27	1.528	22.11	14.47	0.933	1.09	1.16	1.1359	49.1454	2	2	2	0	0	0	0	0	0	0	0	0	0	0	0	0	0	0	0	0	0	0	0	0	0	0	0	0	0	0	0
513	111741	0.681	24.13	35.43	0.669	3.18	4.75	0.474	5.48	11.57	0.81	15.47	19.11	0.515	0.54	1.05	1.1458	55.7351	2	2	2	0	0	0	0	0	0	0	0	0	0	0	0	0	0	0	0	0	0	0	0	0	0	0	0	0	0	0	0
514	111745	1.176	52.23	44.4	0.979	5.35	5.46	0.923	13.18	14.29	1.367	33.7	24.65	0.715	0.84	1.17	1.1334	47.3261	2	2	2	0	0	0	0	0	0	0	0	0	0	0	0	0	0	0	0	0	0	0	0	0	0	0	0	0	0	0	0
515	111749	1.03	48.23	46.81	0.752	4.41	5.86	0.794	11.79	14.84	1.227	32.03	26.11	0.508	0.59	1.15	1.1465	42.8356	2	2	2	0	0	0	0	0	0	0	0	0	0	0	0	0	0	0	0	0	0	0	0	0	0	0	0	0	0	0	0
516	111751	0.979	30.97	31.65	0.715	3.41	4.76	0.71	8.39	11.81	1.272	19.18	15.08	0.714	0.93	1.3	1.152	44.7493	2	2	2	0	0	0	0	0	0	0	0	0	0	0	0	0	0	0	0	0	0	0	0	0	0	0	0	0	0	0	0
517	111752	1.091	45.05	41.31	0.977	5.67	5.8	0.82	8.71	10.62	1.233	30.67	24.89	0.526	0.64	1.22	1.1479	40.2965	2	2	2	0	0	0	0	0	0	0	0	0	0	0	0	0	0	0	0	0	0	0	0	0	0	0	0	0	0	0	0
518	111754	0.88	28.55	32.45	0.777	3.66	4.71	0.655	6.97	10.64	1.048	17.92	17.1	0.549	0.62	1.12	1.1401	53.256	2	2	2	0	0	0	0	0	0	0	0	0	0	0	0	0	0	0	0	0	0	0	0	0	0	0	0	0	0	0	0
519	111770	0.836	26.93	32.22	0.658	3.21	4.87	0.631	6.12	9.7	0.998	17.61	17.65	0.452	0.53	1.17	1.1356	47.1647	2	2	2	0	0	0	0	0	0	0	0	0	0	0	0	0	0	0	0	0	0	0	0	0	0	0	0	0	0	0	0
520	111781	1.022	33.62	32.9	0.653	2.97	4.54	0.751	7.91	10.53	1.275	22.74	17.83	0.655	0.67	1.02	1.1538	42.6579	2	2	2	0	0	0	0	0	0	0	0	0	0	0	0	0	0	0	0	0	0	0	0	0	0	0	0	0	0	0	0
521	111783	0.998	38.26	38.35	0.941	5.31	5.65	0.657	8.21	12.5	1.225	24.73	20.19	0.766	0.85	1.12	1.1414	49.5908	1	2	2	1	0	0	68	2	9	0	0	0	0	0	0	0	0	0	0	0	0	0	0	0	0	0	0	0	0	0	0
522	111784	0.945	37.52	39.72	0.713	4.37	6.12	0.671	10	14.89	1.238	23.15	18.7	0.465	0.55	1.18	1.156	46.34	2	2	2	0	0	0	0	0	0	0	0	0	0	0	0	0	0	0	0	0	0	0	0	0	0	0	0	0	0	0	0
523	111787	1.139	54.21	47.62	1.034	6.33	6.13	0.797	12.31	15.45	1.366	35.57	26.04	0.859	1.13	1.32	1.1501	41.5407	2	2	1	0	0	1	0	0	0	0	0	0	0	0	0	0	0	0	0	0	0	0	0	0	0	0	0	0	0	0	0
524	111790	0.89	37.26	41.88	0.752	4.46	5.93	0.685	8.2	11.97	1.026	24.6	23.98	0.386	0.44	1.14	1.1563	46.5427	2	2	2	0	0	0	0	0	0	0	0	0	0	0	0	0	0	0	0	0	0	0	0	0	0	0	0	0	0	0	0
525	111792	0.742	26.65	35.94	0.697	3.42	4.91	0.54	6.43	11.92	0.879	16.8	19.11	0.433	0.45	1.04	1.1434	55.6232	2	2	2	0	0	0	0	0	0	0	0	0	0	0	0	0	0	0	0	0	0	0	0	0	0	0	0	0	0	0	0
526	111795	1.046	50.24	48.04	0.899	5.28	5.87	0.908	14.01	15.44	1.158	30.94	26.73	0.599	0.7	1.16	1.1319	50.1699	2	2	2	0	0	0	0	0	0	0	0	0	0	0	0	0	0	0	0	0	0	0	0	0	0	0	0	0	0	0	0
527	111797	1.015	38.47	37.92	0.739	4.38	5.92	0.693	7.46	10.77	1.255	26.64	21.23	0.574	0.6	1.05	1.1493	44.7334	2	2	2	0	0	0	0	0	0	0	0	0	0	0	0	0	0	0	0	0	0	0	0	0	0	0	0	0	0	0	0
528	111798	0.72	31.33	43.53	0.495	2.94	5.94	0.575	8.35	14.51	0.869	20.04	23.08	0.228	0.25	1.1	1.1565	45.1401	2	2	2	0	0	0	0	0	0	0	0	0	0	0	0	0	0	0	0	0	0	0	0	0	0	0	0	0	0	0	0
529	111799	0.816	31.66	38.8	0.716	3.86	5.4	0.672	9.45	14.06	0.949	18.35	19.35	0.588	0.61	1.04	1.1572	46.78	2	2	2	0	0	0	0	0	0	0	0	0	0	0	0	0	0	0	0	0	0	0	0	0	0	0	0	0	0	0	0
530	111800	0.777	22.78	29.31	0.67	2.89	4.31	0.525	4.67	8.88	0.945	15.23	16.11	0.482	0.54	1.12	1.1581	50.1102	2	2	2	0	0	0	0	0	0	0	0	0	0	0	0	0	0	0	0	0	0	0	0	0	0	0	0	0	0	0	0
531	111804	1.013	35.06	34.62	0.927	4.68	5.05	0.723	8.19	11.32	1.216	22.19	18.25	0.687	0.78	1.14	1.1263	44.8039	2	2	2	0	0	0	0	0	0	0	0	0	0	0	0	0	0	0	0	0	0	0	0	0	0	0	0	0	0	0	0
532	111809	0.748	27.62	36.91	0.632	3.33	5.26	0.517	6.05	11.7	0.915	18.24	19.95	0.442	0.48	1.1	1.15	54.3022	2	2	2	0	0	0	0	0	0	0	0	0	0	0	0	0	0	0	0	0	0	0	0	0	0	0	0	0	0	0	0
533	111814	0.749	29.25	39.08	0.6	3.3	5.5	0.559	6.08	10.89	0.876	19.87	22.69	0.403	0.53	1.32	1.1478	43.3861	2	2	2	0	0	0	0	0	0	0	0	0	0	0	0	0	0	0	0	0	0	0	0	0	0	0	0	0	0	0	0
534	111821	0.774	22.01	28.43	0.646	2.99	4.63	0.616	5	8.11	0.894	14.02	15.68	0.463	0.54	1.17	1.1378	49.4459	2	2	2	0	0	0	0	0	0	0	0	0	0	0	0	0	0	0	0	0	0	0	0	0	0	0	0	0	0	0	0
535	111823	0.823	35.81	43.5	0.66	3.84	5.81	0.572	6.93	12.11	0.979	25.04	25.58	0.474	0.62	1.31	1.137	51.4422	1	2	2	1	0	0	70	2	1	0	0	0	0	0	0	0	0	0	0	0	0	0	0	0	0	0	0	0	0	0	0
536	111824	1.161	42.11	36.29	0.928	4.93	5.31	0.862	10.05	11.66	1.405	27.13	19.31	0.76	0.8	1.05	1.1489	45.4811	2	2	2	0	0	0	0	0	0	0	0	0	0	0	0	0	0	0	0	0	0	0	0	0	0	0	0	0	0	0	0
537	111835	1.077	34.74	32.27	0.433	0.14	0.31	0	0	0	1.083	34.6	31.95	0.254	0.06	0.23	1.1452	52.5417	2	2	2	0	0	0	0	0	0	0	0	0	0	0	0	0	0	0	0	0	0	0	0	0	0	0	0	0	0	0	0
538	111839	0.761	22.9	30.11	0.618	2.94	4.75	0.611	5.24	8.58	0.877	14.72	16.79	0.555	0.72	1.3	1.1387	53.7723	2	2	2	0	0	0	0	0	0	0	0	0	0	0	0	0	0	0	0	0	0	0	0	0	0	0	0	0	0	0	0
539	111840	0.703	26.14	37.21	0.562	2.98	5.3	0.479	5.95	12.4	0.883	17.22	19.51	0.276	0.3	1.1	1.1351	50.057	2	2	2	0	0	0	0	0	0	0	0	0	0	0	0	0	0	0	0	0	0	0	0	0	0	0	0	0	0	0	0
540	111866	0.894	36.59	40.91	0.673	3.99	5.93	0.714	8.89	12.45	1.053	23.71	22.53	0.423	0.48	1.13	1.1476	45.5047	2	2	2	0	0	0	0	0	0	0	0	0	0	0	0	0	0	0	0	0	0	0	0	0	0	0	0	0	0	0	0
541	111870	0.904	28.43	31.45	0.741	3.61	4.87	0.682	7.23	10.6	1.101	17.59	15.98	0.491	0.55	1.12	1.1494	55.5263	2	2	2	0	0	0	0	0	0	0	0	0	0	0	0	0	0	0	0	0	0	0	0	0	0	0	0	0	0	0	0
542	111874	0.854	34.45	40.33	0.812	4.43	5.46	0.719	9.16	12.74	0.943	20.86	22.13	0.556	0.6	1.07	1.145	51.2839	2	2	2	0	0	0	0	0	0	0	0	0	0	0	0	0	0	0	0	0	0	0	0	0	0	0	0	0	0	0	0
543	111875	0.806	30.03	37.27	0.665	3.41	5.13	0.627	5.74	9.15	0.908	20.89	22.99	0.606	0.79	1.3	1.1337	49.4608	1	2	2	1	0	0	16	1	0	0	0	0	0	0	0	0	0	0	0	0	0	0	0	0	0	0	0	0	0	0	0
544	111876	0.95	35.61	37.49	0.739	3.65	4.93	0.639	7.41	11.6	1.172	24.55	20.95	0.484	0.56	1.17	1.1512	42.2135	2	2	2	0	0	0	0	0	0	0	0	0	0	0	0	0	0	0	0	0	0	0	0	0	0	0	0	0	0	0	0
545	111879	0.854	31.86	37.31	0.715	3.77	5.27	0.679	9.53	14.05	1.032	18.55	17.98	0.474	0.51	1.07	1.1439	48.4023	2	2	2	0	0	0	0	0	0	0	0	0	0	0	0	0	0	0	0	0	0	0	0	0	0	0	0	0	0	0	0
546	111882	0.729	26.39	36.22	0.625	3.36	5.38	0.526	6.61	12.57	0.898	16.41	18.27	0.402	0.48	1.2	1.1365	53.7464	2	2	2	0	0	0	0	0	0	0	0	0	0	0	0	0	0	0	0	0	0	0	0	0	0	0	0	0	0	0	0
547	111883	1.189	48.1	40.45	0.941	4.99	5.31	0.985	13.06	13.26	1.373	30.05	21.89	0.474	0.55	1.16	1.1277	48.8374	2	2	2	0	0	0	0	0	0	0	0	0	0	0	0	0	0	0	0	0	0	0	0	0	0	0	0	0	0	0	0
548	111884	1.197	45.71	38.2	0.987	4.84	4.9	0.849	9.77	11.51	1.427	31.11	21.79	0.714	0.85	1.18	1.1443	42.5944	2	2	2	0	0	0	0	0	0	0	0	0	0	0	0	0	0	0	0	0	0	0	0	0	0	0	0	0	0	0	0
549	111886	0.731	24.47	33.5	0.567	2.97	5.23	0.538	5.6	10.4	0.891	15.91	17.87	0.387	0.46	1.18	1.139	50.7866	2	2	2	0	0	0	0	0	0	0	0	0	0	0	0	0	0	0	0	0	0	0	0	0	0	0	0	0	0	0	0
550	111890	1.177	60.18	51.14	1.048	6.4	6.11	0.846	14.21	16.79	1.401	39.56	28.24	0.656	0.73	1.11	1.1452	43.4864	2	2	2	0	0	0	0	0	0	0	0	0	0	0	0	0	0	0	0	0	0	0	0	0	0	0	0	0	0	0	0
551	111893	0.823	27.31	33.18	0.617	3.08	5	0.633	6.07	9.58	0.976	18.16	18.6	0.411	0.47	1.14	1.1411	48.5944	2	2	2	0	0	0	0	0	0	0	0	0	0	0	0	0	0	0	0	0	0	0	0	0	0	0	0	0	0	0	0
552	111896	1.13	39.28	34.78	0.914	4.9	5.36	0.874	9.97	11.41	1.355	24.41	18.01	0.645	0.71	1.11	1.1358	47.5515	2	2	2	0	0	0	0	0	0	0	0	0	0	0	0	0	0	0	0	0	0	0	0	0	0	0	0	0	0	0	0
553	111900	1.16	39	33.62	0.923	4.44	4.81	0.907	9.06	9.99	1.356	25.5	18.81	0.907	1.17	1.29	1.1527	46.0563	2	2	2	0	0	0	0	0	0	0	0	0	0	0	0	0	0	0	0	0	0	0	0	0	0	0	0	0	0	0	0
554	111901	1.213	49.32	40.66	0.945	5.06	5.36	0.92	10.43	11.34	1.411	33.83	23.97	0.67	0.76	1.13	1.1365	52.8791	2	2	2	0	0	0	0	0	0	0	0	0	0	0	0	0	0	0	0	0	0	0	0	0	0	0	0	0	0	0	0
555	111904	1.3	43.91	33.77	1.086	5.63	5.18	1.04	11.22	10.78	1.519	27.06	17.81	1.097	1.42	1.3	1.1368	48.609	2	2	2	0	0	0	0	0	0	0	0	0	0	0	0	0	0	0	0	0	0	0	0	0	0	0	0	0	0	0	0
556	111908	0.88	29.8	33.85	0.696	3.7	5.31	0.647	7.36	11.39	1.093	18.73	17.15	0.459	0.51	1.11	1.1368	53.7041	2	2	2	0	0	0	0	0	0	0	0	0	0	0	0	0	0	0	0	0	0	0	0	0	0	0	0	0	0	0	0
557	111909	1.004	34.46	34.33	0.981	4.7	4.79	0.759	9.17	12.09	1.18	20.59	17.45	0.747	0.82	1.09	1.1358	49.7962	2	2	2	0	0	0	0	0	0	0	0	0	0	0	0	0	0	0	0	0	0	0	0	0	0	0	0	0	0	0	0
558	111921	0.918	39.78	43.33	0.856	5.13	6	0.742	9.58	12.91	1.027	25.07	24.42	0.557	0.65	1.16	1.1484	54.631	2	2	2	0	0	0	0	0	0	0	0	0	0	0	0	0	0	0	0	0	0	0	0	0	0	0	0	0	0	0	0
559	111927	1.012	34.01	33.6	0.865	4.27	4.94	0.752	8.56	11.39	1.226	21.17	17.27	0.752	0.79	1.05	1.1436	44.0421	2	2	2	0	0	0	0	0	0	0	0	0	0	0	0	0	0	0	0	0	0	0	0	0	0	0	0	0	0	0	0
560	111929	1.221	45.2	37.02	1.123	5.72	5.1	1	11.82	11.82	1.376	27.66	20.11	0.785	0.91	1.16	1.1474	41.63	2	2	2	0	0	0	0	0	0	0	0	0	0	0	0	0	0	0	0	0	0	0	0	0	0	0	0	0	0	0	0
561	111930	1.083	44.28	40.88	0.916	5.05	5.51	0.694	8.53	12.3	1.331	30.7	23.07	0.664	0.75	1.12	1.1472	45.2241	2	2	2	0	0	0	0	0	0	0	0	0	0	0	0	0	0	0	0	0	0	0	0	0	0	0	0	0	0	0	0
562	111934	0.952	27.79	29.2	0.857	3.93	4.58	0.614	6.1	9.93	1.21	17.76	14.68	0.668	0.69	1.04	1.1332	49.7015	2	2	2	0	0	0	0	0	0	0	0	0	0	0	0	0	0	0	0	0	0	0	0	0	0	0	0	0	0	0	0
563	111938	0.862	32.98	38.26	0.706	3.66	5.19	0.667	9.45	14.18	1.052	19.87	18.89	0.624	0.81	1.3	1.1358	49.79	2	2	2	0	0	0	0	0	0	0	0	0	0	0	0	0	0	0	0	0	0	0	0	0	0	0	0	0	0	0	0
564	111943	0.789	36.76	46.58	0.594	3.19	5.37	0.502	6.99	13.92	0.974	26.58	27.29	0.303	0.36	1.17	1.1413	51.0676	2	2	2	0	0	0	0	0	0	0	0	0	0	0	0	0	0	0	0	0	0	0	0	0	0	0	0	0	0	0	0
565	111945	0.851	36.13	42.44	0.691	3.84	5.57	0.674	10.22	15.17	1.016	22.07	21.71	0.452	0.54	1.19	1.1543	48.7994	2	2	2	0	0	0	0	0	0	0	0	0	0	0	0	0	0	0	0	0	0	0	0	0	0	0	0	0	0	0	0
566	111956	0.72	25.89	35.99	0.6	3.41	5.68	0.561	7.38	13.15	0.88	15.11	17.16	0.453	0.59	1.3	1.1499	53.4006	2	2	2	0	0	0	0	0	0	0	0	0	0	0	0	0	0	0	0	0	0	0	0	0	0	0	0	0	0	0	0
567	111968	0.878	40.63	46.27	0.76	3.98	5.24	0.674	8.55	12.68	0.991	28.1	28.35	0.548	0.63	1.15	1.1483	43.8805	2	2	2	0	0	0	0	0	0	0	0	0	0	0	0	0	0	0	0	0	0	0	0	0	0	0	0	0	0	0	0
568	111973	0.831	23.88	28.73	0.759	3.33	4.38	0.639	5.05	7.9	0.943	15.5	16.44	0.431	0.49	1.14	1.1302	46.9368	2	2	2	0	0	0	0	0	0	0	0	0	0	0	0	0	0	0	0	0	0	0	0	0	0	0	0	0	0	0	0
569	111975	0.922	32.93	35.73	0.773	4.07	5.27	0.717	8.64	12.04	1.098	20.22	18.42	0.466	0.52	1.11	1.137	48.0079	2	2	2	0	0	0	0	0	0	0	0	0	0	0	0	0	0	0	0	0	0	0	0	0	0	0	0	0	0	0	0
570	111983	0.891	48.72	54.7	0.692	4.42	6.39	0.642	10.36	16.14	1.055	33.94	32.17	0.525	0.59	1.11	1.1345	47.1954	2	2	2	0	0	0	0	0	0	0	0	0	0	0	0	0	0	0	0	0	0	0	0	0	0	0	0	0	0	0	0
571	111986	1.021	48.64	47.63	0.913	5.74	6.29	0.762	9.27	12.17	1.153	33.63	29.17	0.813	1.05	1.3	1.1479	42.4971	2	2	2	0	0	0	0	0	0	0	0	0	0	0	0	0	0	0	0	0	0	0	0	0	0	0	0	0	0	0	0
572	111994	0.784	39.05	49.81	0.705	3.89	5.51	0.634	8.29	13.07	0.861	26.87	31.22	0.709	0.93	1.32	1.147	42.2919	2	2	2	0	0	0	0	0	0	0	0	0	0	0	0	0	0	0	0	0	0	0	0	0	0	0	0	0	0	0	0
573	111997	0.844	36.33	43.06	0.647	3.55	5.49	0.632	8.51	13.47	1.007	24.28	24.1	0.396	0.46	1.16	1.1437	52.1739	2	2	2	0	0	0	0	0	0	0	0	0	0	0	0	0	0	0	0	0	0	0	0	0	0	0	0	0	0	0	0
574	112001	0.96	44.22	46.06	0.744	4.33	5.82	0.724	10.01	13.84	1.132	29.88	26.4	0.441	0.55	1.26	1.1481	42.9159	2	1	2	0	1	0	0	0	0	0	0	0	0	0	0	35	1	0	0	0	0	0	0	0	0	0	0	0	0	0	0
575	112008	0.981	40.43	41.21	0.785	4.34	5.52	0.678	9.81	14.47	1.239	26.28	21.21	0.442	0.47	1.07	1.148	45.9139	2	2	2	0	0	0	0	0	0	0	0	0	0	0	0	0	0	0	0	0	0	0	0	0	0	0	0	0	0	0	0
576	112011	0.788	35.17	44.64	0.643	3.94	6.12	0.649	9.21	14.19	0.905	22.02	24.32	0.412	0.47	1.14	1.135	51.5707	2	2	2	0	0	0	0	0	0	0	0	0	0	0	0	0	0	0	0	0	0	0	0	0	0	0	0	0	0	0	0
577	112014	0.92	38.87	42.23	0.782	4.2	5.37	0.774	8.76	11.32	1.014	25.91	25.55	0.47	0.52	1.12	1.156	47.9656	2	2	2	0	0	0	0	0	0	0	0	0	0	0	0	0	0	0	0	0	0	0	0	0	0	0	0	0	0	0	0
578	112016	1.033	34.97	33.85	0.92	3.66	3.98	0.742	7.24	9.76	1.197	24.07	20.11	0.798	1.03	1.3	1.1509	43.3495	2	2	2	0	0	0	0	0	0	0	0	0	0	0	0	0	0	0	0	0	0	0	0	0	0	0	0	0	0	0	0
579	112019	0.906	31.44	34.7	0.802	3.69	4.61	0.678	8.23	12.14	1.087	19.52	17.95	0.544	0.6	1.11	1.1345	51.7749	2	2	2	0	0	0	0	0	0	0	0	0	0	0	0	0	0	0	0	0	0	0	0	0	0	0	0	0	0	0	0
580	112021	1.031	34.36	33.34	0.94	4.72	5.02	0.831	9.01	10.85	1.18	20.63	17.48	0.852	1.11	1.3	1.1303	44.7592	2	2	2	0	0	0	0	0	0	0	0	0	0	0	0	0	0	0	0	0	0	0	0	0	0	0	0	0	0	0	0
581	112028	0.899	29.87	33.21	0.665	3.5	5.27	0.685	7.08	10.34	1.095	19.28	17.61	0.398	0.47	1.17	1.1494	43.9886	2	1	1	0	3	1	0	0	0	0	0	0	0	0	0	8	1	0	10	1	0	12	1	0	0	0	0	0	0	0	0
582	112045	0.95	39.44	41.53	0.763	3.66	4.8	0.727	8.63	11.87	1.092	27.15	24.87	0.559	0.69	1.24	1.1451	40.9503	1	2	2	1	0	0	16	1	0	0	0	0	0	0	0	0	0	0	0	0	0	0	0	0	0	0	0	0	0	0	0
583	112047	1.16	46.8	40.35	0.871	4.94	5.68	0.838	10.49	12.53	1.416	31.37	22.15	0.713	0.8	1.13	1.1313	44.6525	2	2	2	0	0	0	0	0	0	0	0	0	0	0	0	0	0	0	0	0	0	0	0	0	0	0	0	0	0	0	0
584	112054	0.808	29.74	36.82	0.775	3.87	4.99	0.598	8.4	14.05	0.983	17.47	17.78	0.587	0.68	1.16	1.1376	52.2751	2	2	2	0	0	0	0	0	0	0	0	0	0	0	0	0	0	0	0	0	0	0	0	0	0	0	0	0	0	0	0
585	112071	0.781	23.53	30.11	0.571	2.6	4.56	0.602	5.44	9.05	0.938	15.48	16.51	0.39	0.46	1.18	1.1389	51.0884	2	2	2	0	0	0	0	0	0	0	0	0	0	0	0	0	0	0	0	0	0	0	0	0	0	0	0	0	0	0	0
586	112078	1.136	42.11	37.06	0.881	4.04	4.58	0.814	9.57	11.76	1.375	28.5	20.72	0.53	0.55	1.04	1.1546	46.3203	2	2	2	0	0	0	0	0	0	0	0	0	0	0	0	0	0	0	0	0	0	0	0	0	0	0	0	0	0	0	0
587	112079	0.831	27.46	33.06	0.682	3.48	5.1	0.628	8.48	13.5	1.072	15.51	14.46	0.44	0.52	1.18	1.1517	45.5268	2	2	2	0	0	0	0	0	0	0	0	0	0	0	0	0	0	0	0	0	0	0	0	0	0	0	0	0	0	0	0
588	112080	1.013	41.42	40.9	0.728	4.1	5.64	0.837	9.7	11.59	1.167	27.62	23.67	0.527	0.61	1.16	1.1464	44.7079	2	2	2	0	0	0	0	0	0	0	0	0	0	0	0	0	0	0	0	0	0	0	0	0	0	0	0	0	0	0	0
589	112081	0.93	40.22	43.26	0.772	4.15	5.37	0.662	9.33	14.11	1.124	26.74	23.78	0.506	0.6	1.18	1.1326	47.5401	2	2	2	0	0	0	0	0	0	0	0	0	0	0	0	0	0	0	0	0	0	0	0	0	0	0	0	0	0	0	0
590	112086	1.098	38.17	34.77	0.841	4.48	5.33	0.788	8.06	10.23	1.334	25.63	19.21	0.634	0.73	1.16	1.1313	46.4635	2	2	2	0	0	0	0	0	0	0	0	0	0	0	0	0	0	0	0	0	0	0	0	0	0	0	0	0	0	0	0
591	112089	0.856	27.87	32.3	0.67	3.51	5.24	0.641	6.17	9.62	1.043	18.19	17.44	0.483	0.57	1.17	1.1471	45.3969	2	2	2	0	0	0	0	0	0	0	0	0	0	0	0	0	0	0	0	0	0	0	0	0	0	0	0	0	0	0	0
592	112095	0.605	24.37	40.25	0.508	2.89	5.68	0.414	5.77	13.94	0.762	15.71	20.63	0.243	0.28	1.16	1.1397	51.0278	2	2	2	0	0	0	0	0	0	0	0	0	0	0	0	0	0	0	0	0	0	0	0	0	0	0	0	0	0	0	0
593	112099	0.867	30.29	34.95	0.714	3.24	4.53	0.576	5.56	9.65	1.035	21.5	20.77	0.595	0.77	1.3	1.1594	45.4362	2	2	2	0	0	0	0	0	0	0	0	0	0	0	0	0	0	0	0	0	0	0	0	0	0	0	0	0	0	0	0
594	112104	0.763	26.06	34.17	0.699	3.33	4.76	0.555	5.54	9.98	0.885	17.2	19.43	0.465	0.48	1.03	1.1424	50.8477	2	2	2	0	0	0	0	0	0	0	0	0	0	0	0	0	0	0	0	0	0	0	0	0	0	0	0	0	0	0	0
595	112105	1.113	47.86	42.99	0.968	5.47	5.65	0.949	11.77	12.4	1.228	30.62	24.94	0.757	0.86	1.14	1.1331	47.2233	2	2	2	0	0	0	0	0	0	0	0	0	0	0	0	0	0	0	0	0	0	0	0	0	0	0	0	0	0	0	0
596	112113	0.848	27.72	32.69	0.725	3.54	4.89	0.559	5.98	10.71	1.065	18.2	17.09	0.786	0.98	1.25	1.1391	47.9876	2	2	2	0	0	0	0	0	0	0	0	0	0	0	0	0	0	0	0	0	0	0	0	0	0	0	0	0	0	0	0
597	112117	1.08	41.5	38.43	0.714	3.71	5.2	0.806	10.06	12.49	1.336	27.72	20.74	0.477	0.53	1.12	1.1516	44.6317	2	2	2	0	0	0	0	0	0	0	0	0	0	0	0	0	0	0	0	0	0	0	0	0	0	0	0	0	0	0	0
598	112123	0.886	41.42	46.76	0.725	4.15	5.72	0.664	10.67	16.06	1.065	26.6	24.98	0.471	0.54	1.16	1.1309	46.9718	2	2	2	0	0	0	0	0	0	0	0	0	0	0	0	0	0	0	0	0	0	0	0	0	0	0	0	0	0	0	0
599	112124	0.66	29.67	44.97	0.54	3.05	5.65	0.477	6.38	13.37	0.78	20.24	25.95	0.275	0.31	1.12	1.1418	54.5802	2	2	2	0	0	0	0	0	0	0	0	0	0	0	0	0	0	0	0	0	0	0	0	0	0	0	0	0	0	0	0
600	112126	0.899	35.22	39.16	0.8	4.16	5.2	0.673	8.63	12.83	1.062	22.44	21.14	0.615	0.8	1.3	1.1336	49.1526	2	2	2	0	0	0	0	0	0	0	0	0	0	0	0	0	0	0	0	0	0	0	0	0	0	0	0	0	0	0	0
601	112127	1.139	36.78	32.3	1.002	4.62	4.61	0.838	7.12	8.5	1.305	25.04	19.19	0.783	0.9	1.16	1.1321	43.8192	2	2	2	0	0	0	0	0	0	0	0	0	0	0	0	0	0	0	0	0	0	0	0	0	0	0	0	0	0	0	0
602	112132	0.93	44.64	47.98	0.804	4.8	5.97	0.683	9.72	14.24	1.084	30.12	27.77	0.446	0.52	1.16	1.1389	50.8756	2	2	2	0	0	0	0	0	0	0	0	0	0	0	0	0	0	0	0	0	0	0	0	0	0	0	0	0	0	0	0
603	112135	0.81	28.67	35.4	0.616	3.33	5.41	0.615	6.47	10.53	0.969	18.86	19.46	0.425	0.49	1.17	1.1594	48.8378	2	2	2	0	0	0	0	0	0	0	0	0	0	0	0	0	0	0	0	0	0	0	0	0	0	0	0	0	0	0	0
604	112136	1.014	45.41	44.77	0.738	4.54	6.15	0.73	9.58	13.12	1.227	31.29	25.5	0.553	0.64	1.16	1.1362	49.1732	2	2	2	0	0	0	0	0	0	0	0	0	0	0	0	0	0	0	0	0	0	0	0	0	0	0	0	0	0	0	0
605	112137	0.926	29	31.31	0.757	3.41	4.5	0.712	8.15	11.44	1.135	17.45	15.38	0.562	0.62	1.1	1.1423	50.1333	2	2	2	0	0	0	0	0	0	0	0	0	0	0	0	0	0	0	0	0	0	0	0	0	0	0	0	0	0	0	0
606	112138	0.589	24.18	41.04	0.578	3.25	5.62	0.411	4.69	11.42	0.676	16.24	24.01	0.293	0.33	1.11	1.1558	47.0954	1	1	2	1	1	0	99999	2	2	0	0	0	0	0	0	70	2	2	0	0	0	0	0	0	0	0	0	0	0	0	0
607	112149	1.266	46.73	36.93	0.937	5.36	5.72	0.998	12.48	12.5	1.545	28.9	18.71	0.804	0.9	1.11	1.1431	42.5006	2	2	2	0	0	0	0	0	0	0	0	0	0	0	0	0	0	0	0	0	0	0	0	0	0	0	0	0	0	0	0
608	112159	1.138	43.19	37.95	0.979	5.1	5.21	0.899	10.41	11.59	1.308	27.67	21.15	0.788	0.92	1.16	1.1393	50.4786	2	2	2	0	0	0	0	0	0	0	0	0	0	0	0	0	0	0	0	0	0	0	0	0	0	0	0	0	0	0	0
609	112170	0.889	29.73	33.43	0.764	3.64	4.76	0.696	7.6	10.91	1.042	18.49	17.76	0.706	0.92	1.3	1.1415	51.7945	2	2	2	0	0	0	0	0	0	0	0	0	0	0	0	0	0	0	0	0	0	0	0	0	0	0	0	0	0	0	0
610	112171	0.801	19.45	24.29	0.632	2.36	3.74	0.684	5.85	8.55	0.937	11.25	12	0.481	0.54	1.12	1.1595	48.2757	2	2	2	0	0	0	0	0	0	0	0	0	0	0	0	0	0	0	0	0	0	0	0	0	0	0	0	0	0	0	0
611	112174	1.052	30.91	29.38	0.96	4.4	4.58	0.744	6.6	8.87	1.25	19.9	15.93	0.737	0.81	1.1	1.1366	53.0886	2	2	2	0	0	0	0	0	0	0	0	0	0	0	0	0	0	0	0	0	0	0	0	0	0	0	0	0	0	0	0
612	112180	0.51	18.32	35.9	0.442	2.23	5.05	0.35	3.96	11.32	0.621	12.13	19.53	0.276	0.34	1.22	1.1405	55.4594	1	2	1	2	0	1	62	2	2	64	2	3	0	0	0	0	0	0	0	0	0	0	0	0	0	0	0	0	0	0	0
613	112184	0.891	44.28	49.68	0.773	4.49	5.81	0.686	9.12	13.3	1.004	30.68	30.57	0.475	0.54	1.14	1.1305	52.7085	2	2	2	0	0	0	0	0	0	0	0	0	0	0	0	0	0	0	0	0	0	0	0	0	0	0	0	0	0	0	0
614	112186	0.825	28.75	34.83	0.737	3.59	4.87	0.599	6.11	10.21	0.964	19.05	19.75	0.589	0.78	1.32	1.1488	45.7999	2	2	2	0	0	0	0	0	0	0	0	0	0	0	0	0	0	0	0	0	0	0	0	0	0	0	0	0	0	0	0
615	112187	1.082	33.32	30.78	0.901	4.46	4.94	0.857	9.09	10.61	1.299	19.77	15.23	0.654	0.76	1.16	1.1529	45.0874	2	2	2	0	0	0	0	0	0	0	0	0	0	0	0	0	0	0	0	0	0	0	0	0	0	0	0	0	0	0	0
616	112193	1.001	47.58	47.55	0.818	4.61	5.64	0.711	9.47	13.33	1.172	33.5	28.58	0.611	0.68	1.12	1.1579	47.1075	2	2	2	0	0	0	0	0	0	0	0	0	0	0	0	0	0	0	0	0	0	0	0	0	0	0	0	0	0	0	0
617	112194	0.536	19.58	36.55	0.576	3.09	5.37	0.47	5.48	11.66	0.564	11.01	19.52	0.398	0.52	1.3	1.1381	52.4413	2	1	2	0	1	0	0	0	0	0	0	0	0	0	0	16	1	0	0	0	0	0	0	0	0	0	0	0	0	0	0
618	112195	0.924	31.71	34.34	0.813	4.09	5.04	0.725	8.16	11.25	1.078	19.46	18.05	0.794	1.03	1.3	1.1293	46.864	2	2	2	0	0	0	0	0	0	0	0	0	0	0	0	0	0	0	0	0	0	0	0	0	0	0	0	0	0	0	0
619	112200	1.17	54.53	46.6	0.905	5.38	5.94	0.934	12.37	13.25	1.342	36.79	27.4	0.615	0.71	1.16	1.1397	48.0817	2	1	2	0	1	0	0	0	0	0	0	0	0	0	0	60	2	2	0	0	0	0	0	0	0	0	0	0	0	0	0
620	112207	0.934	28.5	30.5	0.761	3.6	4.73	0.703	7.16	10.18	1.138	17.74	15.59	0.684	0.89	1.3	1.1535	45.794	2	2	2	0	0	0	0	0	0	0	0	0	0	0	0	0	0	0	0	0	0	0	0	0	0	0	0	0	0	0	0
621	112210	1.359	63.22	46.52	1.11	6.88	6.2	1.075	15.87	14.76	1.584	40.47	25.55	1.004	1.12	1.12	1.1402	48.5177	2	2	2	0	0	0	0	0	0	0	0	0	0	0	0	0	0	0	0	0	0	0	0	0	0	0	0	0	0	0	0
622	112212	1.195	60.24	50.4	1.082	6.35	5.87	0.931	14.49	15.57	1.361	39.4	28.96	0.698	0.78	1.12	1.1245	45.5542	2	2	1	0	0	1	0	0	0	0	0	0	0	0	0	0	0	0	0	0	0	0	0	0	0	0	0	0	0	0	0
623	112215	0.771	29.93	38.82	0.649	3.58	5.51	0.545	6.8	12.49	0.939	19.55	20.82	0.37	0.41	1.11	1.1426	51.6363	2	2	2	0	0	0	0	0	0	0	0	0	0	0	0	0	0	0	0	0	0	0	0	0	0	0	0	0	0	0	0
624	112221	0.914	23.41	25.62	0.724	3.42	4.73	0.654	4.88	7.46	1.125	15.11	13.44	0.536	0.56	1.04	1.1374	48.4736	2	2	2	0	0	0	0	0	0	0	0	0	0	0	0	0	0	0	0	0	0	0	0	0	0	0	0	0	0	0	0
625	112226	1.088	45.69	41.98	0.78	4.29	5.5	0.827	10.87	13.15	1.309	30.53	23.32	0.577	0.67	1.16	1.136	50.6144	2	2	2	0	0	0	0	0	0	0	0	0	0	0	0	0	0	0	0	0	0	0	0	0	0	0	0	0	0	0	0
626	112230	0.966	37.83	39.17	0.813	4.8	5.9	0.794	9.77	12.3	1.109	23.26	20.97	0.382	0.45	1.17	1.1496	40.6033	2	2	2	0	0	0	0	0	0	0	0	0	0	0	0	0	0	0	0	0	0	0	0	0	0	0	0	0	0	0	0
627	112237	0.78	23.39	30	0.66	2.68	4.07	0.502	4.21	8.39	0.94	16.49	17.54	0.534	0.56	1.04	1.1457	54.6783	2	2	2	0	0	0	0	0	0	0	0	0	0	0	0	0	0	0	0	0	0	0	0	0	0	0	0	0	0	0	0
628	112238	0.955	28.15	29.47	0.696	3.29	4.72	0.772	7.83	10.14	1.167	17.03	14.6	0.596	0.77	1.3	1.1557	47.4651	2	2	2	0	0	0	0	0	0	0	0	0	0	0	0	0	0	0	0	0	0	0	0	0	0	0	0	0	0	0	0
629	112240	0.684	21.99	32.15	0.617	2.91	4.73	0.44	5.25	11.93	0.892	13.82	15.49	0.397	0.44	1.11	1.1429	53.962	2	2	2	0	0	0	0	0	0	0	0	0	0	0	0	0	0	0	0	0	0	0	0	0	0	0	0	0	0	0	0
630	112243	0.814	26.66	32.76	0.676	3.46	5.12	0.591	6.48	10.96	1.003	16.72	16.67	0.486	0.57	1.17	1.1414	53.873	2	1	2	0	1	0	0	0	0	0	0	0	0	0	0	45	1	0	0	0	0	0	0	0	0	0	0	0	0	0	0
631	112265	0.952	36.87	38.71	0.712	3.98	5.59	0.725	8.79	12.12	1.148	24.09	21	0.521	0.6	1.15	1.1367	48.6013	2	2	2	0	0	0	0	0	0	0	0	0	0	0	0	0	0	0	0	0	0	0	0	0	0	0	0	0	0	0	0
632	112268	0.957	46.69	48.76	0.91	5.44	5.98	0.74	11.51	15.56	1.092	29.74	27.22	0.595	0.7	1.17	1.1328	47.5529	2	2	2	0	0	0	0	0	0	0	0	0	0	0	0	0	0	0	0	0	0	0	0	0	0	0	0	0	0	0	0
633	112269	0.67	24.33	36.31	0.627	3.01	4.8	0.453	5.62	12.41	0.822	15.69	19.09	0.399	0.45	1.14	1.1377	47.1811	2	2	2	0	0	0	0	0	0	0	0	0	0	0	0	0	0	0	0	0	0	0	0	0	0	0	0	0	0	0	0
634	112270	0.819	29.62	36.18	0.664	3.49	5.26	0.613	6.92	11.3	0.979	19.21	19.63	0.469	0.55	1.17	1.15	46.3653	2	2	2	0	0	0	0	0	0	0	0	0	0	0	0	0	0	0	0	0	0	0	0	0	0	0	0	0	0	0	0
635	112276	1.053	35.53	33.75	0.922	4.38	4.75	0.799	8.44	10.56	1.232	22.71	18.44	0.785	1.03	1.32	1.1506	44.0437	2	2	2	0	0	0	0	0	0	0	0	0	0	0	0	0	0	0	0	0	0	0	0	0	0	0	0	0	0	0	0
636	112280	0.636	20.31	31.94	0.614	2.95	4.8	0.458	4.7	10.27	0.751	12.66	16.87	0.301	0.34	1.11	1.1417	51.4742	2	2	2	0	0	0	0	0	0	0	0	0	0	0	0	0	0	0	0	0	0	0	0	0	0	0	0	0	0	0	0
637	112282	1.03	31.48	30.56	0.872	3.98	4.56	0.777	7.69	9.9	1.231	19.81	16.09	0.796	0.82	1.04	1.1375	46.8005	2	2	2	0	0	0	0	0	0	0	0	0	0	0	0	0	0	0	0	0	0	0	0	0	0	0	0	0	0	0	0
638	112287	0.794	29.66	37.35	0.724	3.58	4.95	0.641	7.94	12.39	0.906	18.14	20.02	0.497	0.65	1.32	1.1457	43.8717	2	2	2	0	0	0	0	0	0	0	0	0	0	0	0	0	0	0	0	0	0	0	0	0	0	0	0	0	0	0	0
639	112291	1.2	53.59	44.67	1.039	5.66	5.44	0.862	12.53	14.53	1.433	35.4	24.7	0.799	0.9	1.12	1.136	51.9907	2	2	2	0	0	0	0	0	0	0	0	0	0	0	0	0	0	0	0	0	0	0	0	0	0	0	0	0	0	0	0
640	112294	0.899	38.56	42.89	0.727	3.9	5.37	0.739	8.25	11.17	1.002	26.41	26.36	0.52	0.59	1.14	1.1506	45.1446	2	2	2	0	0	0	0	0	0	0	0	0	0	0	0	0	0	0	0	0	0	0	0	0	0	0	0	0	0	0	0
641	112299	0.886	30.47	34.38	0.701	3.78	5.4	0.678	6.86	10.12	1.051	19.82	18.86	0.465	0.54	1.17	1.1555	46.3801	2	2	2	0	0	0	0	0	0	0	0	0	0	0	0	0	0	0	0	0	0	0	0	0	0	0	0	0	0	0	0
642	112300	0.992	44.14	44.49	0.764	4.37	5.72	0.728	10.52	14.46	1.203	29.25	24.31	0.523	0.59	1.13	1.144	43.431	2	1	2	0	1	0	0	0	0	0	0	0	0	0	0	60	2	3	0	0	0	0	0	0	0	0	0	0	0	0	0
643	112305	1.08	40.91	37.89	0.907	4.51	4.98	0.874	10.9	12.47	1.247	25.5	20.44	0.601	0.68	1.14	1.1325	41.3654	2	2	2	0	0	0	0	0	0	0	0	0	0	0	0	0	0	0	0	0	0	0	0	0	0	0	0	0	0	0	0
644	112314	0.997	29.74	29.82	0.788	3.69	4.68	0.809	7.66	9.47	1.174	18.39	15.67	0.677	0.7	1.03	1.1389	50.4754	2	2	2	0	0	0	0	0	0	0	0	0	0	0	0	0	0	0	0	0	0	0	0	0	0	0	0	0	0	0	0
645	112315	1.106	32.24	29.16	0.88	3.59	4.08	0.886	7.1	8.01	1.263	21.55	17.07	0.751	0.97	1.3	1.1245	45.4593	2	2	2	0	0	0	0	0	0	0	0	0	0	0	0	0	0	0	0	0	0	0	0	0	0	0	0	0	0	0	0
646	112317	0.977	47.58	48.68	0.845	4.76	5.63	0.746	10.63	14.25	1.118	32.19	28.8	0.575	0.67	1.17	1.1601	45.7658	2	2	2	0	0	0	0	0	0	0	0	0	0	0	0	0	0	0	0	0	0	0	0	0	0	0	0	0	0	0	0
647	112327	1.128	49.39	43.8	0.986	5.69	5.78	0.788	11.58	14.69	1.376	32.11	23.33	0.718	0.83	1.16	1.1423	43.2807	2	2	2	0	0	0	0	0	0	0	0	0	0	0	0	0	0	0	0	0	0	0	0	0	0	0	0	0	0	0	0
648	112328	0.812	35.24	43.41	0.618	3.58	5.8	0.608	6.77	11.13	0.94	24.89	26.48	0.411	0.48	1.16	1.1388	52.1665	2	2	2	0	0	0	0	0	0	0	0	0	0	0	0	0	0	0	0	0	0	0	0	0	0	0	0	0	0	0	0
649	112331	1.094	50.99	46.61	0.89	5.12	5.76	0.781	9.99	12.79	1.279	35.88	28.06	0.607	0.7	1.16	1.1364	47.8886	2	2	2	0	0	0	0	0	0	0	0	0	0	0	0	0	0	0	0	0	0	0	0	0	0	0	0	0	0	0	0
650	112333	1.132	39.51	34.91	0.931	4.79	5.15	0.835	8.57	10.27	1.341	26.15	19.5	0.781	0.91	1.17	1.1526	41.5895	2	2	2	0	0	0	0	0	0	0	0	0	0	0	0	0	0	0	0	0	0	0	0	0	0	0	0	0	0	0	0
651	112335	0.836	23.08	27.61	0.641	2.79	4.35	0.611	5.59	9.15	1.041	14.69	14.11	0.62	0.64	1.04	1.1442	51.6862	2	2	2	0	0	0	0	0	0	0	0	0	0	0	0	0	0	0	0	0	0	0	0	0	0	0	0	0	0	0	0
652	112344	0.932	29.61	31.77	0.705	3.28	4.65	0.691	6.67	9.65	1.125	19.66	17.47	0.738	0.97	1.32	1.1467	46.7473	2	2	2	0	0	0	0	0	0	0	0	0	0	0	0	0	0	0	0	0	0	0	0	0	0	0	0	0	0	0	0
653	112345	0.796	40.26	50.61	0.664	4.45	6.7	0.567	10.55	18.61	0.998	25.26	25.3	0.345	0.4	1.16	1.1362	48.3951	2	1	2	0	1	0	0	0	0	0	0	0	0	0	0	24	1	0	0	0	0	0	0	0	0	0	0	0	0	0	0
654	112347	0.977	40.97	41.96	0.769	4.07	5.3	0.654	9.25	14.16	1.229	27.65	22.5	0.592	0.68	1.16	1.1558	46.3968	2	2	2	0	0	0	0	0	0	0	0	0	0	0	0	0	0	0	0	0	0	0	0	0	0	0	0	0	0	0	0
655	112359	1.073	48.4	45.08	0.799	4.66	5.83	0.711	10.05	14.14	1.341	33.69	25.12	0.462	0.53	1.16	1.1576	43.7798	2	2	2	0	0	0	0	0	0	0	0	0	0	0	0	0	0	0	0	0	0	0	0	0	0	0	0	0	0	0	0
656	112361	1.035	42.7	41.26	0.848	4.48	5.28	0.807	10.47	12.97	1.207	27.75	23	0.712	0.79	1.12	1.1508	44.7702	2	2	2	0	0	0	0	0	0	0	0	0	0	0	0	0	0	0	0	0	0	0	0	0	0	0	0	0	0	0	0
657	112363	0.899	28.81	32.06	0.699	3.24	4.63	0.723	7.13	9.87	1.05	18.44	17.56	0.453	0.51	1.12	1.1548	46.5549	2	2	2	0	0	0	0	0	0	0	0	0	0	0	0	0	0	0	0	0	0	0	0	0	0	0	0	0	0	0	0
658	112365	0.756	23.54	31.14	0.623	2.95	4.74	0.6	6.32	10.52	0.899	14.27	15.87	0.355	0.38	1.08	1.158	47.4816	2	2	2	0	0	0	0	0	0	0	0	0	0	0	0	0	0	0	0	0	0	0	0	0	0	0	0	0	0	0	0
659	112375	1.072	36.82	34.34	0.853	4.58	5.38	0.809	9.41	11.63	1.317	22.83	17.34	0.665	0.77	1.16	1.1549	45.6657	2	2	2	0	0	0	0	0	0	0	0	0	0	0	0	0	0	0	0	0	0	0	0	0	0	0	0	0	0	0	0
660	112386	1.207	51.21	42.44	0.943	5.53	5.86	1.034	14.52	14.05	1.383	31.16	22.52	0.738	0.85	1.15	1.1486	44.5275	2	2	1	0	0	1	0	0	0	0	0	0	0	0	0	0	0	0	0	0	0	0	0	0	0	0	0	0	0	0	0
661	112387	1.188	44.61	37.55	1.059	5.94	5.61	0.82	10.1	12.32	1.457	28.58	19.62	0.731	0.81	1.1	1.1287	48.3476	2	2	2	0	0	0	0	0	0	0	0	0	0	0	0	0	0	0	0	0	0	0	0	0	0	0	0	0	0	0	0
662	112391	0.618	22.84	36.98	0.666	3.41	5.11	0.448	5.55	12.41	0.713	13.88	19.46	0.399	0.52	1.3	1.1413	49.2531	2	2	2	0	0	0	0	0	0	0	0	0	0	0	0	0	0	0	0	0	0	0	0	0	0	0	0	0	0	0	0
663	112399	0.654	19.06	29.13	0.568	2.66	4.68	0.544	4.97	9.14	0.746	11.42	15.31	0.415	0.48	1.17	1.1555	48.822	2	2	2	0	0	0	0	0	0	0	0	0	0	0	0	0	0	0	0	0	0	0	0	0	0	0	0	0	0	0	0
664	112402	0.774	23.11	29.88	0.634	2.8	4.41	0.565	4.96	8.78	0.921	15.36	16.68	0.435	0.49	1.12	1.147	45.1403	2	2	2	0	0	0	0	0	0	0	0	0	0	0	0	0	0	0	0	0	0	0	0	0	0	0	0	0	0	0	0
665	112409	0.989	44.18	44.68	0.729	4.17	5.72	0.705	9.89	14.02	1.208	30.12	24.94	0.663	0.86	1.3	1.1334	46.8178	2	1	2	0	2	0	0	0	0	0	0	0	0	0	0	17	1	0	32	1	0	0	0	0	0	0	0	0	0	0	0
666	112410	1.008	34.95	34.69	0.903	4.21	4.66	0.745	9.4	12.62	1.226	21.34	17.41	0.625	0.72	1.15	1.1336	47.5368	2	2	2	0	0	0	0	0	0	0	0	0	0	0	0	0	0	0	0	0	0	0	0	0	0	0	0	0	0	0	0
667	112414	1.155	51.21	44.32	0.984	5.5	5.6	0.898	12.49	13.9	1.338	33.22	24.82	0.578	0.64	1.1	1.1329	47.6215	2	2	2	0	0	0	0	0	0	0	0	0	0	0	0	0	0	0	0	0	0	0	0	0	0	0	0	0	0	0	0
668	112416	0.838	40	47.73	0.612	3.99	6.52	0.68	10.93	16.08	0.998	25.08	25.13	0.569	0.7	1.23	1.1576	46.3609	2	2	2	0	0	0	0	0	0	0	0	0	0	0	0	0	0	0	0	0	0	0	0	0	0	0	0	0	0	0	0
669	112421	0.944	36.8	38.99	0.754	3.82	5.07	0.659	7.69	11.67	1.137	25.29	22.25	0.484	0.56	1.17	1.1355	48.4844	2	2	2	0	0	0	0	0	0	0	0	0	0	0	0	0	0	0	0	0	0	0	0	0	0	0	0	0	0	0	0
670	112422	1.367	40.75	29.8	1.113	5.1	4.58	1.095	9.49	8.66	1.581	26.17	16.55	0.99	1.12	1.14	1.1366	42.8286	2	2	2	0	0	0	0	0	0	0	0	0	0	0	0	0	0	0	0	0	0	0	0	0	0	0	0	0	0	0	0
671	112426	0.752	23.6	31.39	0.66	3.31	5.02	0.535	5.99	11.19	0.942	14.3	15.18	0.491	0.57	1.16	1.1347	52.1678	2	2	2	0	0	0	0	0	0	0	0	0	0	0	0	0	0	0	0	0	0	0	0	0	0	0	0	0	0	0	0
672	112427	0.856	27.56	32.19	0.727	3.56	4.9	0.596	6.46	10.86	1.067	17.54	16.43	0.515	0.54	1.05	1.1509	48.1059	2	2	2	0	0	0	0	0	0	0	0	0	0	0	0	0	0	0	0	0	0	0	0	0	0	0	0	0	0	0	0
673	112433	0.95	46.11	48.52	0.856	5.31	6.21	0.692	10.66	15.41	1.12	30.13	26.9	0.551	0.64	1.17	1.1436	48.6674	2	1	2	0	1	0	0	0	0	0	0	0	0	0	0	48	1	0	0	0	0	0	0	0	0	0	0	0	0	0	0
674	112435	1.233	65.48	53.1	0.955	6.14	6.43	1.1	20.34	18.49	1.384	38.99	28.18	0.654	0.76	1.16	1.1512	41.6573	2	2	2	0	0	0	0	0	0	0	0	0	0	0	0	0	0	0	0	0	0	0	0	0	0	0	0	0	0	0	0
675	112437	0.823	21.11	25.66	0.742	3.22	4.35	0.488	3.93	8.05	1.052	13.96	13.26	0.574	0.64	1.12	1.146	53.9833	2	2	2	0	0	0	0	0	0	0	0	0	0	0	0	0	0	0	0	0	0	0	0	0	0	0	0	0	0	0	0
676	112446	1.194	46.39	38.86	1.032	5.66	5.49	0.93	9.97	10.71	1.357	30.76	22.66	0.878	1.13	1.29	1.1511	44.4331	2	2	2	0	0	0	0	0	0	0	0	0	0	0	0	0	0	0	0	0	0	0	0	0	0	0	0	0	0	0	0
677	112454	0.879	44.88	51.04	0.752	4.39	5.83	0.725	11.74	16.2	0.991	28.76	29.01	0.472	0.56	1.18	1.1426	43.7987	1	1	2	1	1	0	50	2	3	0	0	0	0	0	0	17	1	0	0	0	0	0	0	0	0	0	0	0	0	0	0
678	112456	1.196	48.55	40.58	1.041	5.54	5.33	1.017	13.27	13.06	1.34	29.74	22.2	0.596	0.69	1.16	1.1336	53.9982	2	1	2	0	1	0	0	0	0	0	0	0	0	0	0	54	2	3	0	0	0	0	0	0	0	0	0	0	0	0	0
679	112464	0.73	21.83	29.92	0.613	2.82	4.61	0.544	5.8	10.67	0.902	13.2	14.64	0.428	0.5	1.17	1.1475	46.123	2	2	2	0	0	0	0	0	0	0	0	0	0	0	0	0	0	0	0	0	0	0	0	0	0	0	0	0	0	0	0
680	112467	0.946	47.55	50.27	0.637	3.92	6.16	0.753	12.92	17.16	1.14	30.71	26.95	0.415	0.49	1.17	1.1519	46.1288	2	2	2	0	0	0	0	0	0	0	0	0	0	0	0	0	0	0	0	0	0	0	0	0	0	0	0	0	0	0	0
681	112471	0.647	20.89	32.28	0.576	3.06	5.3	0.575	6.09	10.58	0.716	11.75	16.4	0.362	0.43	1.18	1.1491	46.4079	2	2	2	0	0	0	0	0	0	0	0	0	0	0	0	0	0	0	0	0	0	0	0	0	0	0	0	0	0	0	0
682	112483	0.874	33.49	38.32	0.704	3.47	4.93	0.594	7.48	12.6	1.084	22.54	20.79	0.42	0.47	1.11	1.1412	49.7993	2	1	2	0	1	0	0	0	0	0	0	0	0	0	0	12	1	0	0	0	0	0	0	0	0	0	0	0	0	0	0
683	112486	0.841	43.37	51.58	0.576	3.36	5.84	0.698	9.14	13.1	0.946	30.87	32.64	0.275	0.32	1.16	1.1504	45.4271	2	2	2	0	0	0	0	0	0	0	0	0	0	0	0	0	0	0	0	0	0	0	0	0	0	0	0	0	0	0	0
684	112488	0.918	32.18	35.05	0.903	4.46	4.94	0.723	8.48	11.74	1.047	19.23	18.37	0.571	0.61	1.08	1.16	39.5934	2	2	2	0	0	0	0	0	0	0	0	0	0	0	0	0	0	0	0	0	0	0	0	0	0	0	0	0	0	0	0
685	112492	1.023	49.74	48.63	0.789	4.54	5.76	0.738	11.86	16.07	1.244	33.34	26.8	0.549	0.64	1.16	1.1359	51.3266	2	1	2	0	1	0	0	0	0	0	0	0	0	0	0	13	1	0	0	0	0	0	0	0	0	0	0	0	0	0	0
686	112494	0.914	31.77	34.76	0.756	3.59	4.74	0.644	7.42	11.53	1.123	20.77	18.48	0.541	0.7	1.3	1.1326	49.0408	2	2	1	0	0	1	0	0	0	0	0	0	0	0	0	0	0	0	0	0	0	0	0	0	0	0	0	0	0	0	0
687	112497	0.758	23.52	31.04	0.613	2.73	4.45	0.604	5	8.28	0.863	15.8	18.31	0.48	0.56	1.17	1.1424	50.9646	2	2	2	0	0	0	0	0	0	0	0	0	0	0	0	0	0	0	0	0	0	0	0	0	0	0	0	0	0	0	0
688	112499	0.92	32.58	35.41	0.713	3.6	5.06	0.647	7.31	11.3	1.137	21.67	19.05	0.597	0.77	1.3	1.1575	46.315	2	2	2	0	0	0	0	0	0	0	0	0	0	0	0	0	0	0	0	0	0	0	0	0	0	0	0	0	0	0	0
689	112501	1.027	30.45	29.65	0.818	3.66	4.47	0.85	6.8	8	1.163	19.99	17.19	0.591	0.67	1.14	1.1277	45.5904	2	2	1	0	0	1	0	0	0	0	0	0	0	0	0	0	0	0	0	0	0	0	0	0	0	0	0	0	0	0	0
690	112503	0.934	31.58	33.79	0.824	3.86	4.68	0.703	7.78	11.08	1.106	19.94	18.03	0.498	0.58	1.17	1.1313	50.1982	1	2	2	1	0	0	57	2	2	0	0	0	0	0	0	0	0	0	0	0	0	0	0	0	0	0	0	0	0	0	0
691	112505	1.14	58.82	51.58	0.95	5.71	6.01	0.928	17.06	18.38	1.326	36.05	27.18	0.671	0.8	1.19	1.1263	50.1316	2	2	2	0	0	0	0	0	0	0	0	0	0	0	0	0	0	0	0	0	0	0	0	0	0	0	0	0	0	0	0
692	112511	0.976	36.04	36.94	0.823	4.15	5.05	0.788	9.33	11.83	1.125	22.57	20.06	0.57	0.64	1.12	1.1375	49.0766	2	2	2	0	0	0	0	0	0	0	0	0	0	0	0	0	0	0	0	0	0	0	0	0	0	0	0	0	0	0	0
693	112512	0.877	29.25	33.34	0.802	3.96	4.93	0.685	7.79	11.36	1.027	17.51	17.04	0.642	0.84	1.3	1.1402	52.6314	2	2	2	0	0	0	0	0	0	0	0	0	0	0	0	0	0	0	0	0	0	0	0	0	0	0	0	0	0	0	0
694	112513	0.851	27.76	32.62	0.739	3.7	5.01	0.574	6.08	10.58	1.056	17.98	17.03	0.682	0.71	1.04	1.1392	48.4923	2	2	2	0	0	0	0	0	0	0	0	0	0	0	0	0	0	0	0	0	0	0	0	0	0	0	0	0	0	0	0
695	112514	0.912	36.14	39.63	0.786	4.65	5.91	0.719	9.32	12.96	1.068	22.17	20.75	0.523	0.58	1.11	1.1496	51.3502	2	2	2	0	0	0	0	0	0	0	0	0	0	0	0	0	0	0	0	0	0	0	0	0	0	0	0	0	0	0	0
696	112516	1.149	56.88	49.52	0.808	4.08	5.06	1.015	16.3	16.06	1.285	36.5	28.4	0.553	0.62	1.12	1.1466	42.4925	2	2	1	0	0	1	0	0	0	0	0	0	0	0	0	0	0	0	0	0	0	0	0	0	0	0	0	0	0	0	0
697	112520	1.167	49.61	42.52	0.972	6.02	6.2	0.817	10.81	13.22	1.419	32.79	23.1	0.774	0.87	1.12	1.1307	48.2792	2	1	2	0	1	0	0	0	0	0	0	0	0	0	0	5	1	0	0	0	0	0	0	0	0	0	0	0	0	0	0
698	112530	0.67	17.72	26.45	0.552	2.6	4.71	0.481	3.24	6.73	0.792	11.88	15	0.355	0.4	1.14	1.1561	49.8104	2	2	2	0	0	0	0	0	0	0	0	0	0	0	0	0	0	0	0	0	0	0	0	0	0	0	0	0	0	0	0
699	112531	0.729	23.81	32.65	0.625	3.01	4.82	0.603	6.4	10.62	0.837	14.4	17.22	0.492	0.52	1.05	1.142	54.7138	2	2	2	0	0	0	0	0	0	0	0	0	0	0	0	0	0	0	0	0	0	0	0	0	0	0	0	0	0	0	0
700	112532	0.941	34.38	36.52	0.801	4.34	5.42	0.663	7.15	10.8	1.127	22.88	20.31	0.696	0.91	1.3	1.1393	51.2935	2	2	2	0	0	0	0	0	0	0	0	0	0	0	0	0	0	0	0	0	0	0	0	0	0	0	0	0	0	0	0
701	112535	1.145	39.28	34.31	0.996	5.12	5.14	0.837	7.81	9.33	1.328	26.35	19.84	0.933	1.21	1.3	1.1301	45.3363	2	2	2	0	0	0	0	0	0	0	0	0	0	0	0	0	0	0	0	0	0	0	0	0	0	0	0	0	0	0	0
702	112542	0.802	23.6	29.43	0.643	3.29	5.12	0.635	5.29	8.33	0.94	15.02	15.98	0.374	0.44	1.17	1.1402	44.526	2	2	2	0	0	0	0	0	0	0	0	0	0	0	0	0	0	0	0	0	0	0	0	0	0	0	0	0	0	0	0
703	112543	0.958	37.28	38.92	0.704	4.24	6.02	0.816	11.03	13.52	1.136	22.01	19.38	0.501	0.58	1.17	1.1339	46.6201	2	2	2	0	0	0	0	0	0	0	0	0	0	0	0	0	0	0	0	0	0	0	0	0	0	0	0	0	0	0	0
704	112552	0.951	28.29	29.74	0.823	3.7	4.5	0.696	6.31	9.07	1.13	18.27	16.17	0.525	0.59	1.12	1.1318	49.3068	2	2	2	0	0	0	0	0	0	0	0	0	0	0	0	0	0	0	0	0	0	0	0	0	0	0	0	0	0	0	0
705	112560	0.986	33.08	33.56	0.784	4.17	5.32	0.786	8.65	10.99	1.175	20.27	17.25	0.708	0.73	1.04	1.1505	43.8677	2	2	2	0	0	0	0	0	0	0	0	0	0	0	0	0	0	0	0	0	0	0	0	0	0	0	0	0	0	0	0
706	112565	0.801	24.97	31.17	0.639	2.99	4.68	0.615	5.8	9.42	0.948	16.19	17.07	0.589	0.76	1.3	1.1327	46.4855	2	2	2	0	0	0	0	0	0	0	0	0	0	0	0	0	0	0	0	0	0	0	0	0	0	0	0	0	0	0	0
707	112567	0.945	42.25	44.69	0.753	4.81	6.39	0.696	9.12	13.11	1.124	28.32	25.19	0.446	0.52	1.16	1.1365	48.3514	2	2	2	0	0	0	0	0	0	0	0	0	0	0	0	0	0	0	0	0	0	0	0	0	0	0	0	0	0	0	0
708	112568	0.895	31.23	34.89	0.667	3.78	5.67	0.717	7.53	10.51	1.065	19.92	18.71	0.589	0.78	1.32	1.148	46.378	2	2	2	0	0	0	0	0	0	0	0	0	0	0	0	0	0	0	0	0	0	0	0	0	0	0	0	0	0	0	0
709	112574	1.188	50.38	42.42	0.873	4.73	5.42	0.861	10.22	11.87	1.41	35.43	25.14	0.805	0.83	1.04	1.1486	46.0066	2	2	2	0	0	0	0	0	0	0	0	0	0	0	0	0	0	0	0	0	0	0	0	0	0	0	0	0	0	0	0
710	112580	0.814	23.47	28.83	0.67	3.05	4.56	0.568	5.37	9.46	1.015	15.04	14.81	0.505	0.66	1.3	1.1389	54.0485	2	2	2	0	0	0	0	0	0	0	0	0	0	0	0	0	0	0	0	0	0	0	0	0	0	0	0	0	0	0	0
711	112583	0.992	33.54	33.82	0.87	4.42	5.09	0.761	7.53	9.89	1.146	21.59	18.84	0.816	1.06	1.3	1.1505	45.4066	2	2	2	0	0	0	0	0	0	0	0	0	0	0	0	0	0	0	0	0	0	0	0	0	0	0	0	0	0	0	0
712	112584	0.872	24.03	27.56	0.685	3.28	4.78	0.7	6.06	8.66	1.04	14.69	14.12	0.612	0.81	1.32	1.1501	47.8908	2	2	2	0	0	0	0	0	0	0	0	0	0	0	0	0	0	0	0	0	0	0	0	0	0	0	0	0	0	0	0
713	112585	0.878	36.53	41.61	0.704	3.7	5.25	0.651	8.4	12.89	1.041	24.44	23.47	0.391	0.45	1.16	1.1334	46.0583	2	2	2	0	0	0	0	0	0	0	0	0	0	0	0	0	0	0	0	0	0	0	0	0	0	0	0	0	0	0	0
714	112589	1.072	43.36	40.44	0.896	5.08	5.67	0.836	10.71	12.81	1.255	27.57	21.97	0.577	0.68	1.17	1.1457	43.0465	2	2	2	0	0	0	0	0	0	0	0	0	0	0	0	0	0	0	0	0	0	0	0	0	0	0	0	0	0	0	0
715	112592	0.65	22.12	34.06	0.648	2.86	4.42	0.446	5.3	11.89	0.786	13.96	17.75	0.394	0.46	1.16	1.1471	51.1526	2	2	2	0	0	0	0	0	0	0	0	0	0	0	0	0	0	0	0	0	0	0	0	0	0	0	0	0	0	0	0
716	112594	1.088	35.6	32.71	0.933	4.79	5.13	0.812	8.68	10.69	1.311	22.13	16.89	0.689	0.72	1.04	1.1317	48.9199	2	2	2	0	0	0	0	0	0	0	0	0	0	0	0	0	0	0	0	0	0	0	0	0	0	0	0	0	0	0	0
717	112596	0.784	26.33	33.6	0.581	2.89	4.96	0.558	5.96	10.68	0.974	17.48	17.95	0.351	0.41	1.16	1.1562	47.3925	2	2	2	0	0	0	0	0	0	0	0	0	0	0	0	0	0	0	0	0	0	0	0	0	0	0	0	0	0	0	0
718	112600	0.852	30.48	35.76	0.638	2.69	4.22	0.67	6.85	10.23	0.983	20.94	21.31	0.402	0.47	1.17	1.1593	42.9917	2	2	2	0	0	0	0	0	0	0	0	0	0	0	0	0	0	0	0	0	0	0	0	0	0	0	0	0	0	0	0
719	112621	0.795	26.99	33.93	0.674	3.22	4.78	0.571	6.06	10.62	0.956	17.7	18.52	0.508	0.66	1.3	1.1503	46.3603	2	2	2	0	0	0	0	0	0	0	0	0	0	0	0	0	0	0	0	0	0	0	0	0	0	0	0	0	0	0	0
720	112637	1.117	55.13	49.37	0.911	5.35	5.87	0.87	12.51	14.39	1.28	37.27	29.11	0.588	0.7	1.19	1.1349	49.0683	2	1	2	0	1	0	0	0	0	0	0	0	0	0	0	10	1	0	0	0	0	0	0	0	0	0	0	0	0	0	0
721	112639	0.782	27.53	35.18	0.658	3.13	4.75	0.626	6.39	10.22	0.891	18.01	20.21	0.476	0.55	1.16	1.1504	46.4491	2	2	1	0	0	1	0	0	0	0	0	0	0	0	0	0	0	0	0	0	0	0	0	0	0	0	0	0	0	0	0
722	112644	0.808	37	45.8	0.619	3.52	5.69	0.565	7.95	14.07	0.98	25.53	26.04	0.437	0.49	1.12	1.1372	51.9825	2	1	1	0	1	1	0	0	0	0	0	0	0	0	0	71	2	3	0	0	0	0	0	0	0	0	0	0	0	0	0
723	112646	0.786	36.92	46.99	0.614	3.73	6.07	0.574	8.02	13.97	0.934	25.17	26.95	0.342	0.39	1.14	1.1595	47.4098	2	2	2	0	0	0	0	0	0	0	0	0	0	0	0	0	0	0	0	0	0	0	0	0	0	0	0	0	0	0	0
724	112665	1.013	37.64	37.16	0.735	3.49	4.75	0.799	9.48	11.87	1.202	24.67	20.53	0.577	0.67	1.16	1.1528	47.8007	2	2	2	0	0	0	0	0	0	0	0	0	0	0	0	0	0	0	0	0	0	0	0	0	0	0	0	0	0	0	0
725	112667	0.916	41.78	45.61	0.798	4.71	5.89	0.669	8.87	13.26	1.066	28.2	26.46	0.573	0.74	1.3	1.1332	47.3414	2	2	2	0	0	0	0	0	0	0	0	0	0	0	0	0	0	0	0	0	0	0	0	0	0	0	0	0	0	0	0
726	112670	0.884	32.12	36.33	0.747	3.75	5.02	0.706	8.92	12.63	1.041	19.45	18.68	0.529	0.57	1.09	1.1594	48.5105	2	2	2	0	0	0	0	0	0	0	0	0	0	0	0	0	0	0	0	0	0	0	0	0	0	0	0	0	0	0	0
727	112680	1.04	43.09	41.43	0.822	4.3	5.23	0.745	10.3	13.83	1.274	28.5	22.38	0.627	0.7	1.11	1.1474	45.7506	2	2	2	0	0	0	0	0	0	0	0	0	0	0	0	0	0	0	0	0	0	0	0	0	0	0	0	0	0	0	0
728	112681	1.111	45.7	41.13	0.944	5.38	5.69	0.834	10.06	12.06	1.295	30.27	23.38	0.605	0.66	1.09	1.1401	51.3675	2	2	2	0	0	0	0	0	0	0	0	0	0	0	0	0	0	0	0	0	0	0	0	0	0	0	0	0	0	0	0
729	112692	1.086	38.35	35.31	0.899	4.35	4.83	0.848	8.06	9.51	1.237	25.94	20.97	0.712	0.83	1.17	1.1361	47.2266	2	2	2	0	0	0	0	0	0	0	0	0	0	0	0	0	0	0	0	0	0	0	0	0	0	0	0	0	0	0	0
730	112699	0.832	39.96	48.01	0.658	4	6.08	0.589	11.12	18.89	1.078	24.83	23.04	0.388	0.4	1.04	1.1349	47.468	2	2	2	0	0	0	0	0	0	0	0	0	0	0	0	0	0	0	0	0	0	0	0	0	0	0	0	0	0	0	0
731	112700	0.904	26.98	29.84	0.71	3.17	4.46	0.649	6.58	10.14	1.131	17.23	15.24	0.505	0.52	1.04	1.139	49.3913	2	2	2	0	0	0	0	0	0	0	0	0	0	0	0	0	0	0	0	0	0	0	0	0	0	0	0	0	0	0	0
732	112703	1.168	47.07	40.3	0.965	5.52	5.72	0.862	10.41	12.08	1.384	31.14	22.5	0.905	1.18	1.3	1.1284	50.2441	2	2	2	0	0	0	0	0	0	0	0	0	0	0	0	0	0	0	0	0	0	0	0	0	0	0	0	0	0	0	0
733	112704	0.913	44.61	48.87	0.737	4.52	6.12	0.742	10.66	14.36	1.037	29.43	28.39	0.491	0.56	1.14	1.14	52.6744	2	2	2	0	0	0	0	0	0	0	0	0	0	0	0	0	0	0	0	0	0	0	0	0	0	0	0	0	0	0	0
734	112707	1.118	49.58	44.35	0.863	5.58	6.47	0.957	12.17	12.71	1.265	31.82	25.17	0.713	0.83	1.17	1.1559	46.242	2	2	2	0	0	0	0	0	0	0	0	0	0	0	0	0	0	0	0	0	0	0	0	0	0	0	0	0	0	0	0
735	112710	0.798	24.22	30.36	0.61	2.81	4.6	0.536	4.89	9.13	0.993	16.52	16.63	0.382	0.44	1.16	1.1317	46.4667	2	2	2	0	0	0	0	0	0	0	0	0	0	0	0	0	0	0	0	0	0	0	0	0	0	0	0	0	0	0	0
736	112711	0.9	28.53	31.71	0.658	2.9	4.4	0.656	6.93	10.56	1.117	18.7	16.75	0.496	0.57	1.16	1.1339	48.5378	2	2	2	0	0	0	0	0	0	0	0	0	0	0	0	0	0	0	0	0	0	0	0	0	0	0	0	0	0	0	0
737	112712	1.069	38.97	36.44	0.832	4.42	5.31	0.795	9.7	12.2	1.313	24.85	18.92	0.566	0.62	1.1	1.1432	42.4598	2	2	2	0	0	0	0	0	0	0	0	0	0	0	0	0	0	0	0	0	0	0	0	0	0	0	0	0	0	0	0
738	112713	0.763	27.75	36.34	0.588	3.09	5.25	0.584	6.58	11.26	0.912	18.08	19.83	0.344	0.41	1.2	1.1429	55.8416	2	2	2	0	0	0	0	0	0	0	0	0	0	0	0	0	0	0	0	0	0	0	0	0	0	0	0	0	0	0	0
739	112718	1.326	57.57	43.41	1.184	6.92	5.85	1.019	14.22	13.95	1.543	36.43	23.61	1.083	1.24	1.15	1.1343	48.1114	2	2	2	0	0	0	0	0	0	0	0	0	0	0	0	0	0	0	0	0	0	0	0	0	0	0	0	0	0	0	0
740	112725	0.901	28.66	31.79	0.792	3.64	4.6	0.688	7.46	10.84	1.074	17.56	16.35	0.658	0.68	1.04	1.1401	53.9879	2	2	2	0	0	0	0	0	0	0	0	0	0	0	0	0	0	0	0	0	0	0	0	0	0	0	0	0	0	0	0
741	112726	1.019	45.84	44.98	0.892	5.17	5.8	0.693	9.62	13.88	1.227	31.05	25.31	0.549	0.63	1.16	1.1498	45.6439	2	2	2	0	0	0	0	0	0	0	0	0	0	0	0	0	0	0	0	0	0	0	0	0	0	0	0	0	0	0	0
742	112731	0.765	28.93	37.83	0.582	3.06	5.26	0.581	7.22	12.43	0.926	18.65	20.14	0.527	0.69	1.32	1.1487	45.4955	2	2	2	0	0	0	0	0	0	0	0	0	0	0	0	0	0	0	0	0	0	0	0	0	0	0	0	0	0	0	0
743	112734	0.889	41.27	46.43	0.683	4.15	6.08	0.738	10.1	13.68	1.013	27.01	26.67	0.352	0.38	1.08	1.155	45.9319	2	2	2	0	0	0	0	0	0	0	0	0	0	0	0	0	0	0	0	0	0	0	0	0	0	0	0	0	0	0	0
744	112738	0.737	33.08	44.87	0.609	3.45	5.67	0.558	7.09	12.7	0.85	22.54	26.51	0.291	0.34	1.16	1.1397	49.7722	2	2	2	0	0	0	0	0	0	0	0	0	0	0	0	0	0	0	0	0	0	0	0	0	0	0	0	0	0	0	0
745	112739	0.979	32.11	32.8	0.8	3.91	4.89	0.691	6.89	9.97	1.188	21.3	17.93	0.557	0.65	1.17	1.1354	49.7826	2	2	2	0	0	0	0	0	0	0	0	0	0	0	0	0	0	0	0	0	0	0	0	0	0	0	0	0	0	0	0
746	112749	0.962	39.54	41.1	0.778	4.22	5.42	0.698	8.41	12.05	1.139	26.91	23.62	0.464	0.55	1.17	1.145	40.1728	2	1	2	0	1	0	0	0	0	0	0	0	0	0	0	53	2	2	0	0	0	0	0	0	0	0	0	0	0	0	0
747	112764	1.005	42.51	42.31	0.857	4.74	5.54	0.748	10.36	13.85	1.196	27.41	22.92	0.623	0.71	1.14	1.1543	44.8552	2	2	2	0	0	0	0	0	0	0	0	0	0	0	0	0	0	0	0	0	0	0	0	0	0	0	0	0	0	0	0
748	112767	0.824	27.06	32.86	0.68	2.97	4.36	0.66	7.08	10.72	0.957	17.01	17.77	0.525	0.59	1.12	1.1357	50.0012	2	2	2	0	0	0	0	0	0	0	0	0	0	0	0	0	0	0	0	0	0	0	0	0	0	0	0	0	0	0	0
749	112770	0.967	47.07	48.68	0.727	4.39	6.04	0.778	9.25	11.9	1.087	33.42	30.74	0.554	0.72	1.31	1.1379	51.5851	2	1	2	0	1	0	0	0	0	0	0	0	0	0	0	22	1	0	0	0	0	0	0	0	0	0	0	0	0	0	0
750	112775	0.966	37.63	38.94	0.822	4.4	5.35	0.675	8.3	12.3	1.171	24.93	21.29	0.542	0.64	1.18	1.1436	42.6085	2	2	2	0	0	0	0	0	0	0	0	0	0	0	0	0	0	0	0	0	0	0	0	0	0	0	0	0	0	0	0
751	112781	0.794	30	37.8	0.693	3.55	5.12	0.658	8.16	12.41	0.902	18.29	20.27	0.458	0.53	1.16	1.1363	54	1	1	2	1	1	0	29	1	0	0	0	0	0	0	0	80	2	1	0	0	0	0	0	0	0	0	0	0	0	0	0
752	112783	1.2	52.14	43.43	0.996	5.52	5.55	0.908	10.8	11.9	1.378	35.82	25.99	0.895	1.18	1.32	1.1448	43.0824	2	2	2	0	0	0	0	0	0	0	0	0	0	0	0	0	0	0	0	0	0	0	0	0	0	0	0	0	0	0	0
753	112786	0.884	37.65	42.58	0.668	3.71	5.55	0.612	7.65	12.5	1.072	26.29	24.54	0.302	0.34	1.14	1.1354	50.0735	2	2	2	0	0	0	0	0	0	0	0	0	0	0	0	0	0	0	0	0	0	0	0	0	0	0	0	0	0	0	0
754	112802	1.029	51.27	49.8	0.902	4.95	5.48	0.841	11.48	13.65	1.136	34.83	30.67	0.746	0.97	1.31	1.1309	47.5679	2	1	2	0	1	0	0	0	0	0	0	0	0	0	0	15	1	0	0	0	0	0	0	0	0	0	0	0	0	0	0
755	112818	0.771	24.1	31.26	0.605	2.95	4.87	0.636	6.02	9.47	0.894	15.13	16.92	0.399	0.47	1.17	1.149	47.5901	2	2	2	0	0	0	0	0	0	0	0	0	0	0	0	0	0	0	0	0	0	0	0	0	0	0	0	0	0	0	0
756	112823	0.897	42.4	47.3	0.635	3.95	6.22	0.579	8.81	15.21	1.146	29.65	25.87	0.325	0.38	1.16	1.1496	45.4739	2	2	2	0	0	0	0	0	0	0	0	0	0	0	0	0	0	0	0	0	0	0	0	0	0	0	0	0	0	0	0
757	112824	0.849	30.19	35.54	0.709	3.85	5.43	0.575	6.52	11.33	1.055	19.82	18.78	0.402	0.47	1.16	1.1377	48.1786	2	1	2	0	1	0	0	0	0	0	0	0	0	0	0	16	1	0	0	0	0	0	0	0	0	0	0	0	0	0	0
758	112828	0.793	32.27	40.7	0.594	3.48	5.86	0.564	7.04	12.5	0.973	21.75	22.34	0.396	0.52	1.3	1.1299	52.6887	2	2	2	0	0	0	0	0	0	0	0	0	0	0	0	0	0	0	0	0	0	0	0	0	0	0	0	0	0	0	0
759	112835	1.043	45.12	43.26	0.748	4.08	5.45	0.779	10.38	13.34	1.253	30.66	24.47	0.474	0.54	1.13	1.1438	43.286	2	2	2	0	0	0	0	0	0	0	0	0	0	0	0	0	0	0	0	0	0	0	0	0	0	0	0	0	0	0	0
760	112840	0.813	24.06	29.58	0.794	3.41	4.3	0.497	4.14	8.33	0.974	16.51	16.95	0.599	0.62	1.03	1.1447	53.3031	2	2	2	0	0	0	0	0	0	0	0	0	0	0	0	0	0	0	0	0	0	0	0	0	0	0	0	0	0	0	0
761	112842	0.671	24.45	36.42	0.67	3.6	5.37	0.471	5.02	10.66	0.777	15.82	20.38	0.449	0.5	1.12	1.144	55.297	2	1	2	0	1	0	0	0	0	0	0	0	0	0	0	70	2	2	0	0	0	0	0	0	0	0	0	0	0	0	0
762	112850	0.951	40.58	42.67	0.727	4.42	6.08	0.713	13.59	19.06	1.288	22.58	17.53	0.46	0.53	1.16	1.1388	48.9039	2	2	2	0	0	0	0	0	0	0	0	0	0	0	0	0	0	0	0	0	0	0	0	0	0	0	0	0	0	0	0
763	112852	0.744	28.2	37.91	0.62	3.26	5.26	0.577	7.32	12.69	0.883	17.62	19.96	0.362	0.4	1.11	1.1351	51.3727	2	2	2	0	0	0	0	0	0	0	0	0	0	0	0	0	0	0	0	0	0	0	0	0	0	0	0	0	0	0	0
764	112853	0.865	35.13	40.63	0.776	4.08	5.26	0.615	8.38	13.64	1.043	22.67	21.73	0.53	0.6	1.14	1.1419	50.4296	2	1	1	0	1	1	0	0	0	0	0	0	0	0	0	56	2	1	0	0	0	0	0	0	0	0	0	0	0	0	0
765	112855	0.97	33.29	34.32	0.622	3.37	5.43	0.706	7.67	10.85	1.233	22.25	18.04	0.341	0.38	1.11	1.1537	46.0322	2	2	2	0	0	0	0	0	0	0	0	0	0	0	0	0	0	0	0	0	0	0	0	0	0	0	0	0	0	0	0
766	112865	0.912	29.67	32.53	0.789	3.82	4.85	0.715	6.76	9.45	1.047	19.08	18.23	0.622	0.82	1.32	1.153	47.8263	2	2	2	0	0	0	0	0	0	0	0	0	0	0	0	0	0	0	0	0	0	0	0	0	0	0	0	0	0	0	0
767	112866	1.107	38.28	34.57	1.078	5.52	5.12	0.764	7.48	9.78	1.286	25.29	19.67	0.888	1.01	1.13	1.1413	41.7174	2	2	2	0	0	0	0	0	0	0	0	0	0	0	0	0	0	0	0	0	0	0	0	0	0	0	0	0	0	0	0
768	112874	0.833	34.71	41.68	0.653	3.79	5.8	0.603	8.5	14.08	1.029	22.42	21.79	0.295	0.34	1.15	1.145	41.8919	2	2	2	0	0	0	0	0	0	0	0	0	0	0	0	0	0	0	0	0	0	0	0	0	0	0	0	0	0	0	0
769	112878	0.827	30.47	36.85	0.647	3.28	5.08	0.548	5.78	10.55	1.009	21.41	21.22	0.401	0.46	1.14	1.1376	44.4303	2	2	2	0	0	0	0	0	0	0	0	0	0	0	0	0	0	0	0	0	0	0	0	0	0	0	0	0	0	0	0
770	112883	0.991	40.02	40.37	0.816	4.19	5.13	0.691	7.39	10.69	1.159	28.44	24.55	0.752	0.98	1.3	1.1329	49.6355	2	1	2	0	1	0	0	0	0	0	0	0	0	0	0	15	1	0	0	0	0	0	0	0	0	0	0	0	0	0	0
771	112897	0.846	29.05	34.33	0.741	3.58	4.82	0.569	6.22	10.93	1.037	19.25	18.57	0.608	0.63	1.04	1.1582	47.9214	2	2	2	0	0	0	0	0	0	0	0	0	0	0	0	0	0	0	0	0	0	0	0	0	0	0	0	0	0	0	0
772	112898	0.895	27.16	30.36	0.979	3.61	3.69	0.605	5.94	9.81	1.045	17.61	16.86	0.762	0.99	1.3	1.1236	51.1642	2	2	2	0	0	0	0	0	0	0	0	0	0	0	0	0	0	0	0	0	0	0	0	0	0	0	0	0	0	0	0
773	112901	0.839	32.85	39.14	0.745	3.84	5.15	0.66	7.94	12.03	0.96	21.08	21.96	0.52	0.54	1.04	1.1392	45.043	2	1	2	0	1	0	0	0	0	0	0	0	0	0	0	5	1	0	0	0	0	0	0	0	0	0	0	0	0	0	0
774	112908	1.077	45.08	41.86	0.806	4.46	5.54	0.834	11.22	13.46	1.286	29.4	22.87	0.56	0.65	1.16	1.1361	46.0648	2	2	2	0	0	0	0	0	0	0	0	0	0	0	0	0	0	0	0	0	0	0	0	0	0	0	0	0	0	0	0
775	112910	0.636	18.33	28.83	0.612	2.96	4.83	0.455	3.91	8.6	0.744	11.46	15.4	0.415	0.54	1.3	1.1399	54.2566	2	1	2	0	1	0	0	0	0	0	0	0	0	0	0	51	2	2	0	0	0	0	0	0	0	0	0	0	0	0	0
776	112913	0.91	25.67	28.2	0.717	3.24	4.52	0.717	7.09	9.88	1.112	15.34	13.8	0.553	0.64	1.17	1.1573	45.8414	2	2	2	0	0	0	0	0	0	0	0	0	0	0	0	0	0	0	0	0	0	0	0	0	0	0	0	0	0	0	0
777	112919	0.833	33.07	39.69	0.706	3.81	5.39	0.571	7.07	12.39	1.013	22.2	21.91	0.486	0.57	1.17	1.1514	46.9045	2	1	2	0	1	0	0	0	0	0	0	0	0	0	0	27	1	0	0	0	0	0	0	0	0	0	0	0	0	0	0
778	112926	0.963	40.92	42.51	0.832	5.03	6.05	0.732	10.63	14.52	1.152	25.26	21.94	0.664	0.87	1.31	1.1331	48.2296	2	2	2	0	0	0	0	0	0	0	0	0	0	0	0	0	0	0	0	0	0	0	0	0	0	0	0	0	0	0	0
779	112930	0.922	43.34	47.02	0.815	5.4	6.63	0.711	10.69	15.04	1.075	27.25	25.36	0.551	0.57	1.04	1.1372	50.2007	2	2	2	0	0	0	0	0	0	0	0	0	0	0	0	0	0	0	0	0	0	0	0	0	0	0	0	0	0	0	0
780	112935	0.866	28.69	33.13	0.83	3.66	4.41	0.639	6.99	10.95	1.015	18.04	17.77	0.62	0.69	1.11	1.1479	45.6592	2	2	2	0	0	0	0	0	0	0	0	0	0	0	0	0	0	0	0	0	0	0	0	0	0	0	0	0	0	0	0
781	112937	0.989	49.08	49.63	0.848	4.24	4.99	0.805	10.97	13.64	1.093	33.87	30.99	0.627	0.7	1.12	1.1527	44.3001	2	2	2	0	0	0	0	0	0	0	0	0	0	0	0	0	0	0	0	0	0	0	0	0	0	0	0	0	0	0	0
782	112938	0.728	30.93	42.46	0.681	3.63	5.32	0.534	9.29	17.4	0.913	18.01	19.73	0.543	0.71	1.31	1.1355	50.4093	2	2	2	0	0	0	0	0	0	0	0	0	0	0	0	0	0	0	0	0	0	0	0	0	0	0	0	0	0	0	0
783	112939	0.755	27.59	36.55	0.494	2.54	5.14	0.592	7.65	12.91	0.941	17.41	18.5	0.3	0.34	1.14	1.1567	45.6775	2	2	2	0	0	0	0	0	0	0	0	0	0	0	0	0	0	0	0	0	0	0	0	0	0	0	0	0	0	0	0
784	112944	1.089	41.41	38.02	0.817	4.78	5.85	0.764	8.43	11.04	1.335	28.19	21.13	0.531	0.64	1.21	1.1438	42.9882	2	2	2	0	0	0	0	0	0	0	0	0	0	0	0	0	0	0	0	0	0	0	0	0	0	0	0	0	0	0	0
785	112947	0.662	20.02	30.26	0.511	2.48	4.85	0.483	4.08	8.45	0.794	13.47	16.96	0.302	0.36	1.19	1.154	48.386	1	2	2	1	0	0	80	2	1	0	0	0	0	0	0	0	0	0	0	0	0	0	0	0	0	0	0	0	0	0	0
786	112951	1.12	47.75	42.62	0.873	5.09	5.83	0.91	12.38	13.61	1.306	30.28	23.19	0.674	0.74	1.1	1.1374	44.7706	2	2	2	0	0	0	0	0	0	0	0	0	0	0	0	0	0	0	0	0	0	0	0	0	0	0	0	0	0	0	0
787	112953	0.658	32.5	49.4	0.521	2.97	5.7	0.482	8.78	18.21	0.815	20.76	25.49	0.305	0.34	1.12	1.1425	55.3968	2	2	2	0	0	0	0	0	0	0	0	0	0	0	0	0	0	0	0	0	0	0	0	0	0	0	0	0	0	0	0
788	112955	0.923	28.69	31.08	0.826	3.85	4.66	0.687	6.07	8.84	1.068	18.77	17.58	0.72	0.94	1.31	1.1385	52.276	2	2	2	0	0	0	0	0	0	0	0	0	0	0	0	0	0	0	0	0	0	0	0	0	0	0	0	0	0	0	0
789	112957	0.93	29.25	31.46	0.824	3.57	4.33	0.676	7.15	10.57	1.119	18.53	16.55	0.635	0.74	1.17	1.133	47.9403	2	2	2	0	0	0	0	0	0	0	0	0	0	0	0	0	0	0	0	0	0	0	0	0	0	0	0	0	0	0	0
790	112968	0.812	24.8	30.55	0.714	3.25	4.55	0.616	5.95	9.67	0.956	15.6	16.32	0.61	0.64	1.05	1.1542	48.7679	2	2	2	0	0	0	0	0	0	0	0	0	0	0	0	0	0	0	0	0	0	0	0	0	0	0	0	0	0	0	0
791	112970	0.726	35.38	48.75	0.661	3.68	5.57	0.507	8.2	16.18	0.87	23.5	27	0.398	0.45	1.14	1.1601	47.5625	2	1	2	0	1	0	0	0	0	0	0	0	0	0	0	5	1	0	0	0	0	0	0	0	0	0	0	0	0	0	0
792	112977	0.745	32.63	43.81	0.65	3.64	5.6	0.568	7.76	13.65	0.864	21.24	24.57	0.308	0.36	1.17	1.1379	49.8964	2	2	2	0	0	0	0	0	0	0	0	0	0	0	0	0	0	0	0	0	0	0	0	0	0	0	0	0	0	0	0
793	112978	1	43.67	43.67	0.737	4.15	5.64	0.85	9.93	11.68	1.123	29.59	26.35	0.366	0.43	1.17	1.1481	40.604	2	1	2	0	1	0	0	0	0	0	0	0	0	0	0	17	1	0	0	0	0	0	0	0	0	0	0	0	0	0	0
794	112988	0.958	40.64	42.41	0.767	4.58	5.98	0.62	7.71	12.42	1.181	28.35	24	0.491	0.57	1.16	1.1375	49.7009	2	1	2	0	1	0	0	0	0	0	0	0	0	0	0	16	1	0	0	0	0	0	0	0	0	0	0	0	0	0	0
795	112990	0.812	32.61	40.17	0.687	3.28	4.78	0.586	6.55	11.18	0.941	22.78	24.21	0.57	0.74	1.3	1.1299	53.55	2	2	2	0	0	0	0	0	0	0	0	0	0	0	0	0	0	0	0	0	0	0	0	0	0	0	0	0	0	0	0
796	112992	0.925	43.55	47.1	0.76	4.7	6.18	0.658	8.85	13.47	1.093	30	27.45	0.417	0.43	1.04	1.1371	51.432	2	2	2	0	0	0	0	0	0	0	0	0	0	0	0	0	0	0	0	0	0	0	0	0	0	0	0	0	0	0	0
797	112999	1.114	50.73	45.52	0.941	5.3	5.64	0.79	12.42	15.72	1.366	33	24.17	0.629	0.65	1.04	1.1351	46.9633	2	2	2	0	0	0	0	0	0	0	0	0	0	0	0	0	0	0	0	0	0	0	0	0	0	0	0	0	0	0	0
798	113000	0.894	36.44	40.74	0.686	3.68	5.37	0.713	8.97	12.57	1.044	23.79	22.8	0.481	0.58	1.2	1.1374	48.2432	2	2	2	0	0	0	0	0	0	0	0	0	0	0	0	0	0	0	0	0	0	0	0	0	0	0	0	0	0	0	0
799	113001	0.784	24.17	30.85	0.673	2.96	4.4	0.679	6.79	10	0.877	14.42	16.44	0.488	0.55	1.14	1.1394	49.5739	2	2	2	0	0	0	0	0	0	0	0	0	0	0	0	0	0	0	0	0	0	0	0	0	0	0	0	0	0	0	0
800	113007	0.941	39.63	42.11	0.738	4.15	5.62	0.739	8.97	12.14	1.089	26.51	24.35	0.57	0.64	1.12	1.1524	45.0085	2	2	2	0	0	0	0	0	0	0	0	0	0	0	0	0	0	0	0	0	0	0	0	0	0	0	0	0	0	0	0
801	113008	0.912	33.47	36.69	0.691	3.39	4.91	0.694	7.52	10.84	1.077	22.55	20.93	0.466	0.52	1.11	1.1435	50.2128	2	2	2	0	0	0	0	0	0	0	0	0	0	0	0	0	0	0	0	0	0	0	0	0	0	0	0	0	0	0	0
802	113010	1.05	48.54	46.21	0.882	4.83	5.48	0.741	10.62	14.33	1.253	33.09	26.41	0.716	0.93	1.3	1.1191	47.9609	2	2	2	0	0	0	0	0	0	0	0	0	0	0	0	0	0	0	0	0	0	0	0	0	0	0	0	0	0	0	0
803	113011	0.905	38.37	42.39	0.796	4.34	5.45	0.611	7.53	12.32	1.076	26.51	24.63	0.575	0.75	1.3	1.1216	48.9807	2	1	2	0	2	0	0	0	0	0	0	0	0	0	0	7	1	0	20	1	0	0	0	0	0	0	0	0	0	0	0
804	113013	0.906	26.3	29.04	0.849	3.73	4.39	0.714	7.44	10.42	1.064	15.13	14.22	0.801	1.04	1.3	1.1308	46.0705	2	2	2	0	0	0	0	0	0	0	0	0	0	0	0	0	0	0	0	0	0	0	0	0	0	0	0	0	0	0	0
805	113026	1.095	41.51	37.92	0.915	4.64	5.08	0.818	9.76	11.93	1.296	27.11	20.91	0.702	0.78	1.12	1.1534	45.6324	2	2	2	0	0	0	0	0	0	0	0	0	0	0	0	0	0	0	0	0	0	0	0	0	0	0	0	0	0	0	0
806	113037	0.953	30.9	32.41	0.77	3.12	4.04	0.797	8.1	10.16	1.081	19.69	18.21	0.686	0.9	1.32	1.1514	43.9701	2	2	2	0	0	0	0	0	0	0	0	0	0	0	0	0	0	0	0	0	0	0	0	0	0	0	0	0	0	0	0
807	113038	0.867	31.13	35.9	0.765	4.05	5.29	0.617	7.12	11.54	1.047	19.97	19.08	0.518	0.59	1.14	1.1321	52.491	2	2	2	0	0	0	0	0	0	0	0	0	0	0	0	0	0	0	0	0	0	0	0	0	0	0	0	0	0	0	0
808	113049	0.964	27.08	28.08	0.796	3.58	4.49	0.771	6.74	8.74	1.129	16.76	14.84	0.738	0.96	1.3	1.1613	47.3445	2	2	2	0	0	0	0	0	0	0	0	0	0	0	0	0	0	0	0	0	0	0	0	0	0	0	0	0	0	0	0
809	113057	1.135	42.11	37.11	0.976	4.56	4.68	0.931	10.8	11.59	1.284	26.75	20.83	0.83	1.08	1.3	1.1263	45.7122	2	2	2	0	0	0	0	0	0	0	0	0	0	0	0	0	0	0	0	0	0	0	0	0	0	0	0	0	0	0	0
810	113063	0.653	21.02	32.2	0.559	2.59	4.62	0.534	5.18	9.7	0.741	13.25	17.88	0.336	0.38	1.14	1.1524	48.4701	2	2	2	0	0	0	0	0	0	0	0	0	0	0	0	0	0	0	0	0	0	0	0	0	0	0	0	0	0	0	0
811	113064	1.012	39.91	39.42	0.891	4.88	5.48	0.758	9.32	12.29	1.188	25.71	21.65	0.744	0.96	1.3	1.1326	46.8182	2	2	2	0	0	0	0	0	0	0	0	0	0	0	0	0	0	0	0	0	0	0	0	0	0	0	0	0	0	0	0
812	113073	1.212	42.89	35.4	1.118	5.05	4.52	0.877	11.3	12.88	1.475	26.54	17.99	0.964	1.07	1.11	1.1342	48.881	2	2	2	0	0	0	0	0	0	0	0	0	0	0	0	0	0	0	0	0	0	0	0	0	0	0	0	0	0	0	0
813	113087	0.997	31.8	31.88	0.737	3.72	5.04	0.77	7.48	9.72	1.203	20.6	17.12	0.598	0.79	1.32	1.1448	43.6903	2	2	2	0	0	0	0	0	0	0	0	0	0	0	0	0	0	0	0	0	0	0	0	0	0	0	0	0	0	0	0
814	113088	1.248	58	46.48	1.1	6.92	6.29	0.99	12.63	12.76	1.402	38.46	27.43	0.917	0.95	1.04	1.1379	47.5583	2	2	2	0	0	0	0	0	0	0	0	0	0	0	0	0	0	0	0	0	0	0	0	0	0	0	0	0	0	0	0
815	113094	0.705	23.89	33.87	0.556	2.79	5.02	0.494	6	12.14	0.904	15.11	16.71	0.365	0.42	1.16	1.1564	46.9987	2	2	2	0	0	0	0	0	0	0	0	0	0	0	0	0	0	0	0	0	0	0	0	0	0	0	0	0	0	0	0
816	113104	1.113	36.81	33.03	0.954	4.56	4.78	0.877	8.82	10.05	1.288	23.44	18.2	0.947	1.25	1.32	1.1451	45.5339	2	2	2	0	0	0	0	0	0	0	0	0	0	0	0	0	0	0	0	0	0	0	0	0	0	0	0	0	0	0	0
817	113109	0.919	25.63	27.88	0.746	3.28	4.4	0.664	6.13	9.23	1.138	16.22	14.25	0.594	0.62	1.04	1.1389	49.0941	2	2	2	0	0	0	0	0	0	0	0	0	0	0	0	0	0	0	0	0	0	0	0	0	0	0	0	0	0	0	0
818	113116	1.55	70.99	45.8	1.351	7.49	5.54	1.215	18.86	15.52	1.805	44.64	24.73	1.119	1.32	1.18	1.1318	44.5148	2	1	2	0	1	0	0	0	0	0	0	0	0	0	0	20	1	0	0	0	0	0	0	0	0	0	0	0	0	0	0
819	113118	0.798	27.54	34.51	0.659	3.28	4.97	0.663	7.35	11.08	0.917	16.92	18.46	0.483	0.55	1.14	1.1386	53.2108	2	1	2	0	1	0	0	0	0	0	0	0	0	0	0	10	1	0	0	0	0	0	0	0	0	0	0	0	0	0	0
820	113119	1.08	53.82	49.83	0.834	5.28	6.33	0.836	11.86	14.19	1.252	36.68	29.3	0.542	0.64	1.17	1.1419	42.6767	2	2	2	0	0	0	0	0	0	0	0	0	0	0	0	0	0	0	0	0	0	0	0	0	0	0	0	0	0	0	0
821	113122	0.892	26.93	30.18	0.694	3.16	4.55	0.666	6.24	9.38	1.079	17.53	16.25	0.6	0.79	1.32	1.154	45.5514	2	2	2	0	0	0	0	0	0	0	0	0	0	0	0	0	0	0	0	0	0	0	0	0	0	0	0	0	0	0	0
822	113127	0.799	24.6	30.78	0.633	3.17	5	0.572	5.18	9.06	0.972	16.25	16.72	0.4	0.45	1.11	1.144	43.7004	2	2	2	0	0	0	0	0	0	0	0	0	0	0	0	0	0	0	0	0	0	0	0	0	0	0	0	0	0	0	0
823	113128	0.635	30.66	48.3	0.551	3.14	5.71	0.459	6.05	13.16	0.73	21.47	29.43	0.316	0.37	1.17	1.1424	50.5525	2	1	1	0	2	2	0	0	0	0	0	0	0	0	0	30	1	0	38	1	0	0	0	0	0	0	0	0	0	0	0
824	113129	0.937	44.66	47.66	0.731	4.13	5.65	0.746	8.83	11.84	1.051	31.7	30.18	0.471	0.53	1.13	1.1524	46.458	2	2	2	0	0	0	0	0	0	0	0	0	0	0	0	0	0	0	0	0	0	0	0	0	0	0	0	0	0	0	0
825	113137	1.145	48.34	42.22	0.914	5.39	5.9	0.885	12.8	14.47	1.38	30.15	21.86	0.683	0.79	1.16	1.1349	48.0075	2	2	2	0	0	0	0	0	0	0	0	0	0	0	0	0	0	0	0	0	0	0	0	0	0	0	0	0	0	0	0
826	113152	0.806	27.79	34.47	0.718	3.51	4.88	0.653	7.37	11.28	0.924	16.92	18.3	0.496	0.57	1.16	1.1383	49.2267	2	2	2	0	0	0	0	0	0	0	0	0	0	0	0	0	0	0	0	0	0	0	0	0	0	0	0	0	0	0	0
827	113155	1.151	35.31	30.68	0.913	4.4	4.82	0.957	8.81	9.21	1.327	22.1	16.65	0.788	1.02	1.29	1.1343	48.6638	2	2	2	0	0	0	0	0	0	0	0	0	0	0	0	0	0	0	0	0	0	0	0	0	0	0	0	0	0	0	0
828	113162	0.858	27.04	31.51	0.703	3.56	5.07	0.658	6.61	10.04	1.029	16.87	16.4	0.552	0.65	1.17	1.1448	44.1014	2	2	2	0	0	0	0	0	0	0	0	0	0	0	0	0	0	0	0	0	0	0	0	0	0	0	0	0	0	0	0
829	113163	0.906	30.66	33.84	0.673	3.15	4.68	0.64	7.42	11.59	1.143	20.09	17.57	0.492	0.55	1.11	1.1484	44.0482	2	2	2	0	0	0	0	0	0	0	0	0	0	0	0	0	0	0	0	0	0	0	0	0	0	0	0	0	0	0	0
830	113164	0.913	43.01	47.12	0.762	4.38	5.76	0.652	8.5	13.04	1.064	30.13	28.33	0.363	0.42	1.16	1.1356	46.196	2	2	2	0	0	0	0	0	0	0	0	0	0	0	0	0	0	0	0	0	0	0	0	0	0	0	0	0	0	0	0
831	113166	1.115	49.54	44.44	0.985	5.36	5.44	0.831	11.64	14	1.302	32.54	25	0.747	0.79	1.05	1.1429	42.9711	2	1	2	0	1	0	0	0	0	0	0	0	0	0	0	53	2	2	0	0	0	0	0	0	0	0	0	0	0	0	0
832	113175	0.703	23.27	33.11	0.638	3.3	5.17	0.564	5.75	10.2	0.801	14.22	17.74	0.349	0.41	1.18	1.1466	46.3978	2	2	1	0	0	1	0	0	0	0	0	0	0	0	0	0	0	0	0	0	0	0	0	0	0	0	0	0	0	0	0
833	113179	0.918	26.1	28.43	0.773	3.43	4.43	0.683	5.96	8.73	1.095	16.72	15.27	0.632	0.83	1.31	1.137	50.8778	2	1	2	0	1	0	0	0	0	0	0	0	0	0	0	10	1	0	0	0	0	0	0	0	0	0	0	0	0	0	0
834	113183	0.608	32.09	52.78	0.563	2.92	5.2	0.45	7.1	15.77	0.694	22.07	31.81	0.358	0.4	1.12	1.1349	48.9541	2	2	2	0	0	0	0	0	0	0	0	0	0	0	0	0	0	0	0	0	0	0	0	0	0	0	0	0	0	0	0
835	113189	1.057	46.28	43.78	0.863	4.96	5.75	0.73	9.53	13.06	1.273	31.8	24.98	0.68	0.88	1.3	1.1274	45.2617	2	2	2	0	0	0	0	0	0	0	0	0	0	0	0	0	0	0	0	0	0	0	0	0	0	0	0	0	0	0	0
836	113199	0.688	19.83	28.82	0.59	2.68	4.54	0.459	5.13	11.17	0.917	12.03	13.12	0.474	0.62	1.3	1.1352	56.491	2	1	2	0	2	0	0	0	0	0	0	0	0	0	0	50	2	1	55	2	1	0	0	0	0	0	0	0	0	0	0
837	113201	0.938	33.23	35.42	0.726	3.7	5.1	0.689	7.46	10.82	1.132	22.07	19.49	0.581	0.76	1.3	1.1326	53.7803	2	2	2	0	0	0	0	0	0	0	0	0	0	0	0	0	0	0	0	0	0	0	0	0	0	0	0	0	0	0	0
838	113207	0.945	35.33	37.37	0.808	4.26	5.27	0.664	7.2	10.84	1.123	23.87	21.26	0.644	0.76	1.17	1.1425	45.0119	1	2	1	1	0	1	22	1	0	0	0	0	0	0	0	0	0	0	0	0	0	0	0	0	0	0	0	0	0	0	0
839	113209	0.782	23.1	29.56	0.68	3.04	4.47	0.581	5.15	8.86	0.919	14.91	16.23	0.462	0.54	1.17	1.1385	51.1182	2	2	2	0	0	0	0	0	0	0	0	0	0	0	0	0	0	0	0	0	0	0	0	0	0	0	0	0	0	0	0
840	113211	1.185	46.8	39.48	1.096	6.12	5.59	0.906	12.08	13.33	1.391	28.6	20.57	0.863	1.04	1.2	1.1406	51.0419	2	2	2	0	0	0	0	0	0	0	0	0	0	0	0	0	0	0	0	0	0	0	0	0	0	0	0	0	0	0	0
841	113222	0.833	27.48	32.98	0.688	3.37	4.9	0.589	5.84	9.92	1.006	18.27	18.16	0.484	0.56	1.17	1.1347	47.7156	2	2	2	0	0	0	0	0	0	0	0	0	0	0	0	0	0	0	0	0	0	0	0	0	0	0	0	0	0	0	0
842	113223	0.969	32.17	33.18	0.89	4.57	5.14	0.752	8.29	11.02	1.134	19.31	17.03	0.658	0.77	1.18	1.1397	49.0888	2	2	2	0	0	0	0	0	0	0	0	0	0	0	0	0	0	0	0	0	0	0	0	0	0	0	0	0	0	0	0
843	113224	0.913	39.94	43.74	0.728	4.19	5.76	0.728	9.89	13.58	1.06	25.86	24.4	0.536	0.62	1.15	1.1482	46.2708	2	2	2	0	0	0	0	0	0	0	0	0	0	0	0	0	0	0	0	0	0	0	0	0	0	0	0	0	0	0	0
844	113231	1.037	36.37	35.08	0.772	3.83	4.96	0.849	8.84	10.41	1.203	23.7	19.71	0.56	0.62	1.11	1.1569	45.455	2	2	2	0	0	0	0	0	0	0	0	0	0	0	0	0	0	0	0	0	0	0	0	0	0	0	0	0	0	0	0
845	113236	1.115	35.93	32.22	0.895	4.78	5.35	0.808	9.5	11.76	1.432	21.64	15.12	0.844	1.09	1.3	1.131	46.5803	2	2	2	0	0	0	0	0	0	0	0	0	0	0	0	0	0	0	0	0	0	0	0	0	0	0	0	0	0	0	0
846	113240	0.83	27.96	33.69	0.679	3.35	4.94	0.584	6.27	10.73	1.017	18.34	18.02	0.506	0.59	1.17	1.135	49.2941	2	2	2	0	0	0	0	0	0	0	0	0	0	0	0	0	0	0	0	0	0	0	0	0	0	0	0	0	0	0	0
847	113241	0.644	18.65	28.96	0.539	2.65	4.92	0.483	4.83	10	0.796	11.17	14.04	0.314	0.37	1.18	1.1407	49.4729	2	2	2	0	0	0	0	0	0	0	0	0	0	0	0	0	0	0	0	0	0	0	0	0	0	0	0	0	0	0	0
848	113242	1.091	42.47	38.93	1.001	5.51	5.51	0.771	9.84	12.78	1.313	27.11	20.65	0.71	0.78	1.11	1.1302	46.0904	2	2	2	0	0	0	0	0	0	0	0	0	0	0	0	0	0	0	0	0	0	0	0	0	0	0	0	0	0	0	0
849	113244	0.832	26.76	32.18	0.724	3.8	5.26	0.601	6.35	10.56	1.015	16.61	16.36	0.58	0.75	1.3	1.1462	45.9765	2	2	2	0	0	0	0	0	0	0	0	0	0	0	0	0	0	0	0	0	0	0	0	0	0	0	0	0	0	0	0
850	113246	0.846	27.41	32.41	0.704	3.32	4.72	0.617	6.29	10.19	1.018	17.8	17.49	0.471	0.52	1.1	1.136	49.0786	2	2	2	0	0	0	0	0	0	0	0	0	0	0	0	0	0	0	0	0	0	0	0	0	0	0	0	0	0	0	0
851	113254	0.7	20.92	29.89	0.582	2.66	4.58	0.542	5.26	9.7	0.833	13	15.61	0.418	0.49	1.17	1.1491	47.4191	2	2	2	0	0	0	0	0	0	0	0	0	0	0	0	0	0	0	0	0	0	0	0	0	0	0	0	0	0	0	0
852	113256	1.024	42.52	41.51	0.854	4.87	5.71	0.778	9.87	12.68	1.201	27.77	23.12	0.649	0.75	1.16	1.1284	49.8858	2	1	2	0	1	0	0	0	0	0	0	0	0	0	0	8	1	0	0	0	0	0	0	0	0	0	0	0	0	0	0
853	113267	0.94	29.24	31.1	0.773	3.55	4.59	0.705	7.07	10.02	1.13	18.62	16.48	0.494	0.51	1.04	1.1334	48.2797	2	2	2	0	0	0	0	0	0	0	0	0	0	0	0	0	0	0	0	0	0	0	0	0	0	0	0	0	0	0	0
854	113274	0.806	29.01	35.99	0.668	3.43	5.13	0.548	5.77	10.53	0.974	19.81	20.33	0.391	0.43	1.1	1.1435	48.8249	2	2	2	0	0	0	0	0	0	0	0	0	0	0	0	0	0	0	0	0	0	0	0	0	0	0	0	0	0	0	0
855	113276	0.868	28.12	32.4	0.746	3.41	4.57	0.62	5.52	8.9	1.014	19.18	18.92	0.479	0.55	1.16	1.1563	48.1862	2	2	2	0	0	0	0	0	0	0	0	0	0	0	0	0	0	0	0	0	0	0	0	0	0	0	0	0	0	0	0
856	113279	0.824	29.07	35.28	0.645	3.39	5.26	0.589	6.68	11.34	1.017	18.99	18.68	0.415	0.47	1.14	1.1508	44.7754	2	2	2	0	0	0	0	0	0	0	0	0	0	0	0	0	0	0	0	0	0	0	0	0	0	0	0	0	0	0	0
857	113281	0.88	33.79	38.38	0.768	3.88	5.06	0.655	6.02	9.18	0.989	23.89	24.14	0.648	0.76	1.17	1.1488	44.6868	2	2	2	0	0	0	0	0	0	0	0	0	0	0	0	0	0	0	0	0	0	0	0	0	0	0	0	0	0	0	0
858	113286	0.871	37.1	42.61	0.683	3.83	5.62	0.623	9.28	14.89	1.085	23.99	22.11	0.432	0.49	1.13	1.1462	44.1858	2	2	2	0	0	0	0	0	0	0	0	0	0	0	0	0	0	0	0	0	0	0	0	0	0	0	0	0	0	0	0
859	113287	0.958	36.22	37.8	0.843	5.01	5.94	0.751	9.16	12.19	1.121	22.05	19.67	0.684	0.79	1.16	1.1326	47.8983	2	1	2	0	3	0	0	0	0	0	0	0	0	0	0	17	1	0	17	1	0	25	1	0	0	0	0	0	0	0	0
860	113292	1.104	48.74	44.07	0.783	4.67	5.97	0.916	13.23	14.44	1.303	30.83	23.66	0.475	0.55	1.16	1.1519	41.5519	2	2	2	0	0	0	0	0	0	0	0	0	0	0	0	0	0	0	0	0	0	0	0	0	0	0	0	0	0	0	0
861	113298	0.783	23.08	29.47	0.717	3.54	4.93	0.582	5.27	9.05	0.921	14.27	15.5	0.373	0.42	1.14	1.1323	47.6286	2	2	2	0	0	0	0	0	0	0	0	0	0	0	0	0	0	0	0	0	0	0	0	0	0	0	0	0	0	0	0
862	113301	0.907	26.89	29.65	0.72	3.11	4.32	0.621	5.66	9.12	1.118	18.13	16.22	0.556	0.65	1.16	1.1288	49.5958	2	2	2	0	0	0	0	0	0	0	0	0	0	0	0	0	0	0	0	0	0	0	0	0	0	0	0	0	0	0	0
863	113305	0.862	39.71	46.08	0.671	4.49	6.69	0.707	11.33	16.03	1.023	23.89	23.36	0.389	0.44	1.12	1.1444	45.0079	2	1	2	0	1	0	0	0	0	0	0	0	0	0	0	16	1	0	0	0	0	0	0	0	0	0	0	0	0	0	0
864	113308	1.373	55.96	40.78	1.287	5.52	4.28	1.004	12.13	12.08	1.57	38.32	24.41	0.924	1.02	1.1	1.1351	46.2999	2	2	2	0	0	0	0	0	0	0	0	0	0	0	0	0	0	0	0	0	0	0	0	0	0	0	0	0	0	0	0
865	113311	0.911	38.13	41.86	0.745	4.53	6.09	0.651	8.68	13.34	1.111	24.91	22.43	0.566	0.66	1.17	1.1474	45.1535	2	2	2	0	0	0	0	0	0	0	0	0	0	0	0	0	0	0	0	0	0	0	0	0	0	0	0	0	0	0	0
866	113320	0.791	26.62	33.65	0.647	3.05	4.72	0.603	6.48	10.75	0.94	17.09	18.19	0.475	0.55	1.16	1.1402	53.0382	2	2	2	0	0	0	0	0	0	0	0	0	0	0	0	0	0	0	0	0	0	0	0	0	0	0	0	0	0	0	0
867	113324	0.861	31.17	36.18	0.723	3.71	5.14	0.651	8.08	12.42	1.04	19.38	18.63	0.486	0.55	1.12	1.1359	51.6508	2	2	2	0	0	0	0	0	0	0	0	0	0	0	0	0	0	0	0	0	0	0	0	0	0	0	0	0	0	0	0
868	113326	0.953	37.43	39.28	0.761	3.85	5.06	0.798	9.18	11.51	1.074	24.4	22.71	0.492	0.58	1.17	1.1291	48.8887	2	2	2	0	0	0	0	0	0	0	0	0	0	0	0	0	0	0	0	0	0	0	0	0	0	0	0	0	0	0	0
869	113340	0.556	16.51	29.69	0.453	2.14	4.72	0.392	3.95	10.09	0.7	10.42	14.88	0.247	0.29	1.17	1.1451	54.6995	2	2	2	0	0	0	0	0	0	0	0	0	0	0	0	0	0	0	0	0	0	0	0	0	0	0	0	0	0	0	0
870	113341	0.791	26.65	33.69	0.575	3	5.21	0.599	6.65	11.11	0.979	17	17.37	0.554	0.72	1.31	1.1428	51.6197	2	2	2	0	0	0	0	0	0	0	0	0	0	0	0	0	0	0	0	0	0	0	0	0	0	0	0	0	0	0	0
871	113348	0.907	35.51	39.14	0.678	3.52	5.2	0.684	9	13.16	1.106	22.99	20.79	0.274	0.3	1.1	1.1342	46.1232	2	2	2	0	0	0	0	0	0	0	0	0	0	0	0	0	0	0	0	0	0	0	0	0	0	0	0	0	0	0	0
872	113353	0.656	22.1	33.7	0.516	2.5	4.84	0.525	5.05	9.63	0.756	14.54	19.23	0.433	0.56	1.3	1.1414	50.8495	2	2	2	0	0	0	0	0	0	0	0	0	0	0	0	0	0	0	0	0	0	0	0	0	0	0	0	0	0	0	0
873	113355	1.055	36.45	34.56	0.843	4.11	4.87	0.876	9.77	11.15	1.217	22.57	18.54	0.82	1.06	1.3	1.1506	44.7633	2	2	2	0	0	0	0	0	0	0	0	0	0	0	0	0	0	0	0	0	0	0	0	0	0	0	0	0	0	0	0
874	113362	0.695	28.78	41.41	0.564	3.28	5.82	0.515	6.93	13.47	0.84	18.57	22.12	0.317	0.35	1.11	1.1518	46.7097	2	2	2	0	0	0	0	0	0	0	0	0	0	0	0	0	0	0	0	0	0	0	0	0	0	0	0	0	0	0	0
875	113363	0.733	26.99	36.85	0.59	3.07	5.2	0.587	7.14	12.15	0.861	16.79	19.5	0.35	0.41	1.16	1.1359	52.1458	2	2	2	0	0	0	0	0	0	0	0	0	0	0	0	0	0	0	0	0	0	0	0	0	0	0	0	0	0	0	0
876	113367	0.99	39.81	40.21	0.766	4.71	6.15	0.705	8.64	12.26	1.214	26.45	21.8	0.441	0.49	1.12	1.1298	50.5878	2	2	2	0	0	0	0	0	0	0	0	0	0	0	0	0	0	0	0	0	0	0	0	0	0	0	0	0	0	0	0
877	113369	1.223	52.17	42.65	0.932	5.49	5.89	0.926	12.18	13.14	1.461	34.5	23.61	0.9	1.19	1.32	1.1447	42.9104	2	2	2	0	0	0	0	0	0	0	0	0	0	0	0	0	0	0	0	0	0	0	0	0	0	0	0	0	0	0	0
878	113370	1.167	50.84	43.56	1.087	5.71	5.25	0.946	13.58	14.36	1.318	31.56	23.95	0.709	0.8	1.12	1.1386	50.6474	2	2	2	0	0	0	0	0	0	0	0	0	0	0	0	0	0	0	0	0	0	0	0	0	0	0	0	0	0	0	0
879	113372	1.326	54.63	41.2	1.285	6.3	4.91	0.934	11.1	11.89	1.525	37.22	24.41	0.987	1.1	1.11	1.1356	45.942	2	2	2	0	0	0	0	0	0	0	0	0	0	0	0	0	0	0	0	0	0	0	0	0	0	0	0	0	0	0	0
880	113375	0.768	34.86	45.41	0.666	3.67	5.51	0.608	8.62	14.17	0.877	22.57	25.73	0.351	0.41	1.16	1.1341	47.4048	2	2	2	0	0	0	0	0	0	0	0	0	0	0	0	0	0	0	0	0	0	0	0	0	0	0	0	0	0	0	0
881	113376	0.875	29.25	33.43	0.78	3.41	4.37	0.621	5.76	9.27	1.014	20.08	19.8	0.544	0.64	1.18	1.1432	52.8626	2	2	2	0	0	0	0	0	0	0	0	0	0	0	0	0	0	0	0	0	0	0	0	0	0	0	0	0	0	0	0
882	113378	0.956	41.65	43.59	0.727	4.16	5.72	0.733	10.93	14.91	1.157	26.57	22.96	0.473	0.51	1.09	1.1376	48.908	2	2	2	0	0	0	0	0	0	0	0	0	0	0	0	0	0	0	0	0	0	0	0	0	0	0	0	0	0	0	0
883	113379	1.089	46.41	42.63	0.807	4.15	5.15	0.802	9.61	11.98	1.28	32.64	25.51	0.458	0.51	1.12	1.1505	44.7475	2	2	2	0	0	0	0	0	0	0	0	0	0	0	0	0	0	0	0	0	0	0	0	0	0	0	0	0	0	0	0
884	113385	0.951	40.52	42.6	0.735	4.06	5.52	0.636	8.4	13.2	1.175	28.07	23.88	0.495	0.51	1.04	1.1347	48.1753	1	2	2	1	0	0	56	2	3	0	0	0	0	0	0	0	0	0	0	0	0	0	0	0	0	0	0	0	0	0	0
885	113394	1.374	56.53	41.13	1.333	6.91	5.18	1.026	12.05	11.74	1.552	37.57	24.2	1.147	1.33	1.16	1.1375	47.7401	2	2	2	0	0	0	0	0	0	0	0	0	0	0	0	0	0	0	0	0	0	0	0	0	0	0	0	0	0	0	0
886	113399	1.074	48.65	45.3	0.868	5.18	5.97	0.728	9.4	12.91	1.29	34.07	26.41	0.492	0.56	1.15	1.1548	45.734	2	2	2	0	0	0	0	0	0	0	0	0	0	0	0	0	0	0	0	0	0	0	0	0	0	0	0	0	0	0	0
887	113403	0.965	30.44	31.56	0.839	3.82	4.56	0.703	7.5	10.67	1.171	19.12	16.33	0.584	0.67	1.15	1.1436	50.082	2	2	2	0	0	0	0	0	0	0	0	0	0	0	0	0	0	0	0	0	0	0	0	0	0	0	0	0	0	0	0
888	113404	1.024	42.27	41.28	0.911	4.56	5.01	0.688	10.56	15.35	1.297	27.15	20.93	0.918	1.19	1.3	1.1312	46.1363	2	2	2	0	0	0	0	0	0	0	0	0	0	0	0	0	0	0	0	0	0	0	0	0	0	0	0	0	0	0	0
889	113405	1.039	33.76	32.51	0.834	4.27	5.12	0.78	8.45	10.84	1.271	21.05	16.55	0.641	0.74	1.16	1.1309	47.393	2	2	2	0	0	0	0	0	0	0	0	0	0	0	0	0	0	0	0	0	0	0	0	0	0	0	0	0	0	0	0
890	113407	0.899	27.31	30.36	0.721	3.68	5.11	0.621	6.05	9.74	1.133	17.57	15.51	0.534	0.61	1.13	1.1451	43.9227	2	2	2	0	0	0	0	0	0	0	0	0	0	0	0	0	0	0	0	0	0	0	0	0	0	0	0	0	0	0	0
891	113416	1.025	35.88	34.99	0.885	4.41	4.98	0.726	8.61	11.86	1.26	22.86	18.14	0.75	0.87	1.16	1.1255	46.3	2	2	2	0	0	0	0	0	0	0	0	0	0	0	0	0	0	0	0	0	0	0	0	0	0	0	0	0	0	0	0
892	113425	0.93	30.85	33.19	0.826	3.86	4.67	0.723	7.45	10.3	1.073	19.54	18.21	0.595	0.68	1.14	1.1345	47.7143	2	2	2	0	0	0	0	0	0	0	0	0	0	0	0	0	0	0	0	0	0	0	0	0	0	0	0	0	0	0	0
893	113427	0.84	30.2	35.95	0.771	3.88	5.04	0.59	7.52	12.75	1.034	18.79	18.17	0.514	0.59	1.16	1.1315	48.465	2	2	2	0	0	0	0	0	0	0	0	0	0	0	0	0	0	0	0	0	0	0	0	0	0	0	0	0	0	0	0
894	113430	0.919	34.3	37.32	0.679	3.55	5.24	0.692	10.18	14.7	1.184	20.57	17.38	0.466	0.54	1.17	1.1548	46.7085	2	2	2	0	0	0	0	0	0	0	0	0	0	0	0	0	0	0	0	0	0	0	0	0	0	0	0	0	0	0	0
895	113437	1.052	41.16	39.11	0.873	5.01	5.74	0.745	9.4	12.61	1.289	26.75	20.76	0.606	0.7	1.16	1.1355	51.6413	2	2	2	0	0	0	0	0	0	0	0	0	0	0	0	0	0	0	0	0	0	0	0	0	0	0	0	0	0	0	0
896	113439	0.887	32.85	37.03	0.728	3.73	5.13	0.721	9.17	12.71	1.04	19.96	19.2	0.459	0.53	1.16	1.1535	47.1308	2	2	2	0	0	0	0	0	0	0	0	0	0	0	0	0	0	0	0	0	0	0	0	0	0	0	0	0	0	0	0
897	113440	0.727	28.83	39.65	0.626	3.56	5.68	0.515	8.05	15.64	0.94	17.23	18.33	0.452	0.52	1.16	1.1387	47.4219	2	2	2	0	0	0	0	0	0	0	0	0	0	0	0	0	0	0	0	0	0	0	0	0	0	0	0	0	0	0	0
898	113446	1.058	41.59	39.32	0.94	3.88	4.13	0.721	6.67	9.25	1.197	31.05	25.94	0.624	0.71	1.14	1.1305	44.1712	2	2	2	0	0	0	0	0	0	0	0	0	0	0	0	0	0	0	0	0	0	0	0	0	0	0	0	0	0	0	0
899	113448	0.966	31.15	32.24	0.802	3.69	4.6	0.777	8.16	10.5	1.126	19.3	17.14	0.574	0.67	1.16	1.1351	49.8636	2	2	2	0	0	0	0	0	0	0	0	0	0	0	0	0	0	0	0	0	0	0	0	0	0	0	0	0	0	0	0
900	113450	0.988	31.72	32.11	0.823	3.86	4.69	0.741	6.77	9.14	1.153	21.08	18.28	0.679	0.7	1.04	1.1374	47.1799	2	2	2	0	0	0	0	0	0	0	0	0	0	0	0	0	0	0	0	0	0	0	0	0	0	0	0	0	0	0	0
901	113452	1.032	44.4	43.03	0.837	4.9	5.85	0.884	11.37	12.86	1.157	28.13	24.32	0.55	0.65	1.18	1.1476	45.6656	2	2	2	0	0	0	0	0	0	0	0	0	0	0	0	0	0	0	0	0	0	0	0	0	0	0	0	0	0	0	0
902	113455	1.267	52.73	41.62	0.98	5.18	5.28	0.91	11.26	12.38	1.515	36.29	23.96	0.831	1.08	1.3	1.1354	46.1987	2	1	1	0	1	1	0	0	0	0	0	0	0	0	0	55	2	2	0	0	0	0	0	0	0	0	0	0	0	0	0
903	113461	0.974	41.45	42.57	0.812	4.54	5.59	0.692	8.85	12.79	1.16	28.07	24.19	0.6	0.69	1.16	1.1395	49.6123	2	2	2	0	0	0	0	0	0	0	0	0	0	0	0	0	0	0	0	0	0	0	0	0	0	0	0	0	0	0	0
904	113463	0.977	27.71	28.35	0.844	3.81	4.51	0.772	6.91	8.95	1.141	16.99	14.88	0.727	0.75	1.04	1.1548	46.6727	2	2	2	0	0	0	0	0	0	0	0	0	0	0	0	0	0	0	0	0	0	0	0	0	0	0	0	0	0	0	0
905	113467	0.836	31.92	38.17	0.703	3.78	5.38	0.594	6.68	11.26	0.996	21.45	21.54	0.66	0.86	1.3	1.1581	47.3204	2	2	2	0	0	0	0	0	0	0	0	0	0	0	0	0	0	0	0	0	0	0	0	0	0	0	0	0	0	0	0
906	113473	0.849	30.03	35.38	0.786	3.62	4.6	0.581	6.81	11.72	1.029	19.6	19.05	0.63	0.65	1.04	1.155	47.6289	2	2	2	0	0	0	0	0	0	0	0	0	0	0	0	0	0	0	0	0	0	0	0	0	0	0	0	0	0	0	0
907	113475	0.819	25.12	30.67	0.646	3.08	4.77	0.674	7.98	11.85	1	14.05	14.05	0.404	0.45	1.12	1.1555	48.81	2	2	2	0	0	0	0	0	0	0	0	0	0	0	0	0	0	0	0	0	0	0	0	0	0	0	0	0	0	0	0
908	113477	0.982	30.22	30.79	0.839	4.14	4.94	0.672	6.46	9.62	1.209	19.62	16.23	0.758	0.98	1.3	1.1326	47.1594	2	2	2	0	0	0	0	0	0	0	0	0	0	0	0	0	0	0	0	0	0	0	0	0	0	0	0	0	0	0	0
909	113479	0.752	22.1	29.4	0.601	2.74	4.56	0.595	5.38	9.03	0.885	13.98	15.8	0.403	0.46	1.13	1.1509	45.889	2	2	2	0	0	0	0	0	0	0	0	0	0	0	0	0	0	0	0	0	0	0	0	0	0	0	0	0	0	0	0
910	113482	1.187	52.77	44.46	0.919	5.29	5.76	0.868	12.61	14.53	1.443	34.87	24.17	0.644	0.75	1.16	1.1329	46.7863	2	2	1	0	0	2	0	0	0	0	0	0	0	0	0	0	0	0	0	0	0	0	0	0	0	0	0	0	0	0	0
911	113487	1.014	31.35	30.93	0.881	4.12	4.67	0.826	7.41	8.97	1.147	19.83	17.29	0.731	0.95	1.3	1.1351	44.6242	2	2	2	0	0	0	0	0	0	0	0	0	0	0	0	0	0	0	0	0	0	0	0	0	0	0	0	0	0	0	0
912	113488	0.701	24.58	35.05	0.608	3.16	5.2	0.533	7.24	13.58	0.871	14.18	16.27	0.303	0.36	1.17	1.1478	45.4669	2	2	2	0	0	0	0	0	0	0	0	0	0	0	0	0	0	0	0	0	0	0	0	0	0	0	0	0	0	0	0
913	113492	0.918	33.91	36.96	0.779	4.13	5.31	0.624	6.78	10.88	1.107	22.99	20.77	0.688	0.91	1.32	1.1448	45.5984	2	2	2	0	0	0	0	0	0	0	0	0	0	0	0	0	0	0	0	0	0	0	0	0	0	0	0	0	0	0	0
914	113500	0.925	33.79	36.52	0.706	3.8	5.39	0.746	8.66	11.61	1.092	21.32	19.52	0.441	0.51	1.15	1.138	48.7796	2	2	2	0	0	0	0	0	0	0	0	0	0	0	0	0	0	0	0	0	0	0	0	0	0	0	0	0	0	0	0
915	113501	0.98	42.84	43.72	0.841	4.65	5.54	0.775	9.14	11.79	1.101	29.05	26.39	0.762	0.99	1.3	1.1191	46.1745	2	2	2	0	0	0	0	0	0	0	0	0	0	0	0	0	0	0	0	0	0	0	0	0	0	0	0	0	0	0	0
916	113511	0.829	23.63	28.51	0.651	2.95	4.54	0.68	4.83	7.1	0.939	15.84	16.88	0.542	0.7	1.3	1.1385	47.6959	2	2	2	0	0	0	0	0	0	0	0	0	0	0	0	0	0	0	0	0	0	0	0	0	0	0	0	0	0	0	0
917	113519	0.704	20.14	28.59	0.593	2.94	4.96	0.511	4.64	9.08	0.863	12.55	14.55	0.401	0.47	1.17	1.1615	50.1173	2	2	2	0	0	0	0	0	0	0	0	0	0	0	0	0	0	0	0	0	0	0	0	0	0	0	0	0	0	0	0
918	113521	0.729	32.09	44.03	0.644	3.58	5.56	0.529	7.01	13.25	0.852	21.51	25.23	0.319	0.37	1.15	1.139	46.8015	2	2	2	0	0	0	0	0	0	0	0	0	0	0	0	0	0	0	0	0	0	0	0	0	0	0	0	0	0	0	0
919	113528	0.858	34.79	40.56	0.696	4.01	5.77	0.628	8.82	14.04	1.059	21.96	20.75	0.367	0.41	1.12	1.1346	47.8023	2	1	2	0	5	0	0	0	0	0	0	0	0	0	0	35	1	0	40	1	0	50	2	1	55	2	1	55	2	2	0
920	113541	0.875	29.83	34.11	0.727	3.7	5.09	0.643	7.12	11.08	1.06	19.01	17.93	0.541	0.63	1.16	1.1397	46.9674	2	2	2	0	0	0	0	0	0	0	0	0	0	0	0	0	0	0	0	0	0	0	0	0	0	0	0	0	0	0	0
921	113542	0.768	24.39	31.77	0.596	3.07	5.15	0.58	5.86	10.11	0.936	15.45	16.51	0.451	0.59	1.3	1.1377	49.2618	2	2	1	0	0	1	0	0	0	0	0	0	0	0	0	0	0	0	0	0	0	0	0	0	0	0	0	0	0	0	0
922	113548	0.759	22.65	29.83	0.552	2.58	4.68	0.556	5.84	10.49	0.971	14.24	14.66	0.351	0.36	1.03	1.1437	52.3575	2	1	2	0	2	0	0	0	0	0	0	0	0	0	0	78	2	1	80	2	1	0	0	0	0	0	0	0	0	0	0
923	113549	0.688	22.28	32.38	0.623	2.43	3.9	0.487	4.82	9.89	0.808	15.03	18.59	0.416	0.49	1.17	1.1591	47.0853	2	1	2	0	2	0	0	0	0	0	0	0	0	0	0	45	1	0	46	1	0	0	0	0	0	0	0	0	0	0	0
924	113553	0.852	27.08	31.77	0.691	3.64	5.26	0.678	6.97	10.27	1.015	16.48	16.24	0.542	0.63	1.16	1.1475	44.4652	2	2	2	0	0	0	0	0	0	0	0	0	0	0	0	0	0	0	0	0	0	0	0	0	0	0	0	0	0	0	0
925	113559	0.91	43.82	48.15	0.691	4.06	5.88	0.651	8.64	13.27	1.073	31.12	29	0.398	0.45	1.13	1.1471	43.0356	2	2	2	0	0	0	0	0	0	0	0	0	0	0	0	0	0	0	0	0	0	0	0	0	0	0	0	0	0	0	0
926	113560	1.028	33.94	33.01	0.837	4.16	4.97	0.72	7.27	10.1	1.255	22.51	17.94	0.657	0.78	1.19	1.1563	46.6179	2	2	2	0	0	0	0	0	0	0	0	0	0	0	0	0	0	0	0	0	0	0	0	0	0	0	0	0	0	0	0
927	113566	0.988	33.6	34	0.807	3.86	4.79	0.667	7.6	11.39	1.242	22.13	17.82	0.654	0.69	1.05	1.1474	47.3277	2	2	2	0	0	0	0	0	0	0	0	0	0	0	0	0	0	0	0	0	0	0	0	0	0	0	0	0	0	0	0
928	113573	0.869	33.4	38.41	0.677	3.88	5.73	0.58	7.07	12.19	1.096	22.45	20.49	0.496	0.57	1.15	1.151	45.0505	2	2	2	0	0	0	0	0	0	0	0	0	0	0	0	0	0	0	0	0	0	0	0	0	0	0	0	0	0	0	0
929	113575	0.78	34.49	44.24	0.59	3.46	5.86	0.605	8.7	14.37	0.93	22.33	24.01	0.37	0.45	1.23	1.15	43.5832	1	1	2	1	1	0	56	2	3	0	0	0	0	0	0	49	1	0	0	0	0	0	0	0	0	0	0	0	0	0	0
930	113580	0.859	28.53	33.22	0.675	3.45	5.11	0.629	7.04	11.21	1.067	18.03	16.9	0.476	0.55	1.16	1.1487	47.0235	2	2	2	0	0	0	0	0	0	0	0	0	0	0	0	0	0	0	0	0	0	0	0	0	0	0	0	0	0	0	0
931	113581	0.716	22.73	31.73	0.524	2.55	4.86	0.562	5.5	9.79	0.86	14.68	17.08	0.291	0.32	1.12	1.1381	49.4137	2	2	2	0	0	0	0	0	0	0	0	0	0	0	0	0	0	0	0	0	0	0	0	0	0	0	0	0	0	0	0
932	113582	1.153	46.22	40.1	0.915	5.14	5.62	0.869	10.52	12.11	1.366	30.56	22.37	0.675	0.76	1.12	1.1301	51.2464	2	1	2	0	1	0	0	0	0	0	0	0	0	0	0	15	1	0	0	0	0	0	0	0	0	0	0	0	0	0	0
933	113586	1.075	39.25	36.52	0.818	4.29	5.24	0.848	9.49	11.19	1.268	25.47	20.09	0.589	0.69	1.17	1.1418	42.5601	2	2	2	0	0	0	0	0	0	0	0	0	0	0	0	0	0	0	0	0	0	0	0	0	0	0	0	0	0	0	0
934	113587	0.993	46.55	46.85	0.826	4.91	5.94	0.713	11.44	16.03	1.214	30.2	24.88	0.498	0.59	1.18	1.1497	44.4196	2	1	2	0	1	0	0	0	0	0	0	0	0	0	0	15	1	0	0	0	0	0	0	0	0	0	0	0	0	0	0
935	113590	0.65	30.81	47.38	0.517	3.43	6.63	0.496	7.58	15.29	0.777	19.79	25.46	0.317	0.35	1.12	1.1444	53.0466	2	2	2	0	0	0	0	0	0	0	0	0	0	0	0	0	0	0	0	0	0	0	0	0	0	0	0	0	0	0	0
936	113591	0.832	32.66	39.24	0.693	3.61	5.21	0.609	7.46	12.25	0.992	21.59	21.78	0.422	0.44	1.04	1.1593	47.3553	2	2	2	0	0	0	0	0	0	0	0	0	0	0	0	0	0	0	0	0	0	0	0	0	0	0	0	0	0	0	0
937	113597	0.707	24.26	34.31	0.589	3.17	5.38	0.599	6.17	10.29	0.801	14.92	18.63	0.443	0.57	1.3	1.1382	47.962	2	2	2	0	0	0	0	0	0	0	0	0	0	0	0	0	0	0	0	0	0	0	0	0	0	0	0	0	0	0	0
938	113600	0.749	23.86	31.87	0.719	3.42	4.76	0.615	5.94	9.66	0.831	14.5	17.45	0.487	0.56	1.15	1.1438	51.4185	2	2	2	0	0	0	0	0	0	0	0	0	0	0	0	0	0	0	0	0	0	0	0	0	0	0	0	0	0	0	0
939	113615	0.967	32.3	33.39	0.77	4.13	5.37	0.772	7.8	10.1	1.137	20.37	17.92	0.629	0.65	1.04	1.1548	46.3612	2	2	2	0	0	0	0	0	0	0	0	0	0	0	0	0	0	0	0	0	0	0	0	0	0	0	0	0	0	0	0
940	113616	1.064	35.05	32.95	0.96	4.2	4.38	0.872	9.43	10.81	1.206	21.42	17.77	0.77	0.83	1.08	1.1369	50.6001	2	2	2	0	0	0	0	0	0	0	0	0	0	0	0	0	0	0	0	0	0	0	0	0	0	0	0	0	0	0	0
941	113619	0.788	26.94	34.19	0.602	2.97	4.93	0.63	6.25	9.92	0.917	17.73	19.34	0.483	0.63	1.3	1.133	48.8172	2	2	2	0	0	0	0	0	0	0	0	0	0	0	0	0	0	0	0	0	0	0	0	0	0	0	0	0	0	0	0
942	113621	0.758	25.56	33.7	0.739	3.21	4.35	0.503	5.77	11.48	0.928	16.58	17.87	0.537	0.7	1.3	1.1446	51.3577	2	2	2	0	0	0	0	0	0	0	0	0	0	0	0	0	0	0	0	0	0	0	0	0	0	0	0	0	0	0	0
943	113631	0.867	28.39	32.75	0.768	3.88	5.05	0.658	5.54	8.43	0.984	18.97	19.28	0.487	0.57	1.17	1.1349	52.4698	2	2	2	0	0	0	0	0	0	0	0	0	0	0	0	0	0	0	0	0	0	0	0	0	0	0	0	0	0	0	0
944	113632	0.863	32.36	37.48	0.767	4.13	5.38	0.654	7.81	11.94	1.013	20.43	20.16	0.622	0.82	1.32	1.1394	43.2577	2	2	2	0	0	0	0	0	0	0	0	0	0	0	0	0	0	0	0	0	0	0	0	0	0	0	0	0	0	0	0
945	113639	0.9	33.98	37.76	0.755	4.26	5.65	0.618	8.6	13.92	1.161	21.12	18.19	0.635	0.66	1.04	1.1381	51.4606	2	2	2	0	0	0	0	0	0	0	0	0	0	0	0	0	0	0	0	0	0	0	0	0	0	0	0	0	0	0	0
946	113647	1.053	42.92	40.76	0.947	5.12	5.4	0.807	12.1	15	1.263	25.7	20.36	0.69	0.72	1.04	1.1339	50.7327	2	2	2	0	0	0	0	0	0	0	0	0	0	0	0	0	0	0	0	0	0	0	0	0	0	0	0	0	0	0	0
947	113648	1.033	35.29	34.17	0.821	4.02	4.9	0.756	8.37	11.06	1.258	22.9	18.2	0.508	0.59	1.16	1.1446	43.7254	2	2	2	0	0	0	0	0	0	0	0	0	0	0	0	0	0	0	0	0	0	0	0	0	0	0	0	0	0	0	0
948	113649	1.127	56.17	49.83	0.933	6.06	6.5	0.942	13.8	14.66	1.266	36.3	28.68	0.778	1.02	1.31	1.1441	40.3682	2	2	2	0	0	0	0	0	0	0	0	0	0	0	0	0	0	0	0	0	0	0	0	0	0	0	0	0	0	0	0
949	113651	0.844	24.82	29.42	0.713	2.97	4.17	0.693	5.69	8.21	0.948	16.17	17.04	0.504	0.66	1.32	1.1444	41.4691	2	2	2	0	0	0	0	0	0	0	0	0	0	0	0	0	0	0	0	0	0	0	0	0	0	0	0	0	0	0	0
950	113653	0.813	25.46	31.3	0.689	3.32	4.82	0.593	6.68	11.26	1.015	15.45	15.22	0.498	0.58	1.17	1.1497	45.57	2	2	2	0	0	0	0	0	0	0	0	0	0	0	0	0	0	0	0	0	0	0	0	0	0	0	0	0	0	0	0
951	113664	0.964	43.09	44.71	0.746	4.1	5.5	0.665	10.08	15.16	1.202	28.91	24.05	0.682	0.7	1.03	1.1453	52.6101	2	2	2	0	0	0	0	0	0	0	0	0	0	0	0	0	0	0	0	0	0	0	0	0	0	0	0	0	0	0	0
952	113667	1.165	46.42	39.85	0.917	5.18	5.65	0.856	12.34	14.42	1.461	28.9	19.78	0.688	0.81	1.18	1.1441	43.6127	2	2	2	0	0	0	0	0	0	0	0	0	0	0	0	0	0	0	0	0	0	0	0	0	0	0	0	0	0	0	0
953	113668	1.051	47.69	45.38	0.854	5.54	6.49	0.844	12.01	14.23	1.222	30.14	24.67	0.394	0.45	1.15	1.1368	46.5389	2	2	2	0	0	0	0	0	0	0	0	0	0	0	0	0	0	0	0	0	0	0	0	0	0	0	0	0	0	0	0
954	113669	0.836	29.29	35.04	0.625	3.28	5.25	0.61	6.69	10.96	1.026	19.33	18.83	0.483	0.56	1.16	1.1547	46.4672	2	2	2	0	0	0	0	0	0	0	0	0	0	0	0	0	0	0	0	0	0	0	0	0	0	0	0	0	0	0	0
955	113672	1.178	35.17	29.85	0.911	4.07	4.46	0.889	8.51	9.57	1.429	22.6	15.82	0.801	0.83	1.04	1.1516	45.8105	2	2	2	0	0	0	0	0	0	0	0	0	0	0	0	0	0	0	0	0	0	0	0	0	0	0	0	0	0	0	0
956	113681	1.062	41.02	38.62	0.878	4.7	5.35	0.684	8.69	12.71	1.344	27.63	20.56	0.735	0.85	1.16	1.136	51.6667	2	2	2	0	0	0	0	0	0	0	0	0	0	0	0	0	0	0	0	0	0	0	0	0	0	0	0	0	0	0	0
957	113684	1.279	60.32	47.16	0.858	5.08	5.91	1.029	15.53	15.08	1.518	39.72	26.16	0.893	0.94	1.05	1.1458	40.4424	2	2	2	0	0	0	0	0	0	0	0	0	0	0	0	0	0	0	0	0	0	0	0	0	0	0	0	0	0	0	0
958	113691	0.828	25.22	30.47	0.722	3.57	4.95	0.639	6.18	9.67	0.976	15.47	15.85	0.472	0.52	1.1	1.1377	49.2054	2	2	2	0	0	0	0	0	0	0	0	0	0	0	0	0	0	0	0	0	0	0	0	0	0	0	0	0	0	0	0
959	113699	0.893	31.8	35.62	0.789	3.9	4.94	0.665	7.58	11.39	1.054	20.33	19.29	0.578	0.68	1.17	1.1353	53.0433	2	2	2	0	0	0	0	0	0	0	0	0	0	0	0	0	0	0	0	0	0	0	0	0	0	0	0	0	0	0	0
960	113702	0.92	33.93	36.89	0.715	3.87	5.42	0.699	9.96	14.25	1.167	20.09	17.23	0.463	0.51	1.1	1.1547	46.6072	2	2	2	0	0	0	0	0	0	0	0	0	0	0	0	0	0	0	0	0	0	0	0	0	0	0	0	0	0	0	0
961	113707	0.808	34.82	43.1	0.694	3.88	5.59	0.614	7.81	12.72	0.933	23.14	24.79	0.474	0.62	1.3	1.1511	46.7512	2	2	2	0	0	0	0	0	0	0	0	0	0	0	0	0	0	0	0	0	0	0	0	0	0	0	0	0	0	0	0
962	113715	0.914	44.49	48.66	0.724	4.75	6.56	0.724	10.19	14.07	1.054	29.55	28.03	0.622	0.65	1.05	1.151	45.1669	1	2	2	1	0	0	80	2	1	0	0	0	0	0	0	0	0	0	0	0	0	0	0	0	0	0	0	0	0	0	0
963	113717	1.23	44.38	36.07	0.974	4.76	4.88	0.85	9.72	11.44	1.514	29.9	19.75	0.769	0.9	1.18	1.1565	46.9235	2	2	2	0	0	0	0	0	0	0	0	0	0	0	0	0	0	0	0	0	0	0	0	0	0	0	0	0	0	0	0
964	113730	0.833	39.35	47.25	0.733	4.27	5.82	0.609	9.79	16.08	0.998	25.3	25.35	0.412	0.48	1.17	1.1496	44.2955	2	2	2	0	0	0	0	0	0	0	0	0	0	0	0	0	0	0	0	0	0	0	0	0	0	0	0	0	0	0	0
965	113733	0.842	37.9	45.03	0.705	4.13	5.86	0.615	7.36	11.96	0.971	26.41	27.2	0.429	0.51	1.19	1.1284	50.5666	2	2	2	0	0	0	0	0	0	0	0	0	0	0	0	0	0	0	0	0	0	0	0	0	0	0	0	0	0	0	0
966	113734	1.131	55.61	49.16	0.869	5.34	6.14	0.828	11.44	13.83	1.33	38.84	29.19	0.618	0.71	1.16	1.133	46.8525	2	2	2	0	0	0	0	0	0	0	0	0	0	0	0	0	0	0	0	0	0	0	0	0	0	0	0	0	0	0	0
967	113735	0.903	41.54	45.99	0.729	4.16	5.71	0.673	9.75	14.49	1.071	27.62	25.79	0.495	0.55	1.12	1.1557	44.54	2	1	2	0	1	0	0	0	0	0	0	0	0	0	0	9	1	0	0	0	0	0	0	0	0	0	0	0	0	0	0
968	113736	0.903	39.28	43.47	0.775	4.29	5.54	0.692	8.29	11.98	1.028	26.7	25.96	0.362	0.42	1.15	1.1482	44.5707	2	2	2	0	0	0	0	0	0	0	0	0	0	0	0	0	0	0	0	0	0	0	0	0	0	0	0	0	0	0	0
969	113738	1.093	33.91	31.04	1.1	5.15	4.68	0.835	10.29	12.33	1.317	18.48	14.03	0.928	1.02	1.1	1.1442	52.0827	2	2	2	0	0	0	0	0	0	0	0	0	0	0	0	0	0	0	0	0	0	0	0	0	0	0	0	0	0	0	0
970	113750	1.241	57.35	46.22	0.865	4.81	5.57	0.981	15.92	16.22	1.499	36.62	24.43	0.567	0.66	1.16	1.1524	42.4867	2	2	1	0	0	1	0	0	0	0	0	0	0	0	0	0	0	0	0	0	0	0	0	0	0	0	0	0	0	0	0
971	113751	1.058	52.94	50.02	0.916	5.84	6.37	0.783	11.1	14.18	1.222	36	29.47	0.636	0.77	1.22	1.1499	44.8866	2	2	2	0	0	0	0	0	0	0	0	0	0	0	0	0	0	0	0	0	0	0	0	0	0	0	0	0	0	0	0
972	113766	1.051	41.09	39.1	0.915	4.96	5.43	0.743	9.21	12.4	1.265	26.91	21.27	0.708	0.79	1.12	1.1332	53.5464	2	2	2	0	0	0	0	0	0	0	0	0	0	0	0	0	0	0	0	0	0	0	0	0	0	0	0	0	0	0	0
973	113768	0.77	23.84	30.97	0.665	3.29	4.95	0.494	4.56	9.25	0.953	15.99	16.78	0.498	0.52	1.03	1.1471	54.3462	2	1	2	0	1	0	0	0	0	0	0	0	0	0	0	60	2	1	0	0	0	0	0	0	0	0	0	0	0	0	0
974	113770	1.125	49.51	44.02	0.88	4.77	5.41	0.848	10.99	12.96	1.316	33.76	25.64	0.607	0.7	1.16	1.1389	49.2765	2	2	2	0	0	0	0	0	0	0	0	0	0	0	0	0	0	0	0	0	0	0	0	0	0	0	0	0	0	0	0
975	113773	0.842	36.61	43.46	0.588	3.46	5.88	0.697	8.88	12.74	0.977	24.26	24.84	0.311	0.36	1.16	1.1351	49.1676	2	2	2	0	0	0	0	0	0	0	0	0	0	0	0	0	0	0	0	0	0	0	0	0	0	0	0	0	0	0	0
976	113775	0.903	30.04	33.27	0.717	3.27	4.55	0.651	6.33	9.72	1.077	20.44	18.99	0.472	0.52	1.1	1.1401	52.5228	2	1	2	0	1	0	0	0	0	0	0	0	0	0	0	56	2	1	0	0	0	0	0	0	0	0	0	0	0	0	0
977	113776	1.089	50.81	46.67	0.891	5.61	6.29	0.807	12.28	15.22	1.309	32.93	25.16	0.57	0.69	1.21	1.1239	43.6124	2	2	2	0	0	0	0	0	0	0	0	0	0	0	0	0	0	0	0	0	0	0	0	0	0	0	0	0	0	0	0
978	113777	0.827	36.75	44.42	0.78	3.98	5.1	0.582	7.16	12.3	0.948	25.61	27.02	0.702	0.91	1.29	1.1331	49.5431	2	1	2	0	1	0	0	0	0	0	0	0	0	0	0	62	2	1	0	0	0	0	0	0	0	0	0	0	0	0	0
979	113785	0.994	30.72	30.89	0.795	3.69	4.64	0.729	6.5	8.92	1.184	20.53	17.33	0.695	0.91	1.31	1.1398	50.1705	2	2	2	0	0	0	0	0	0	0	0	0	0	0	0	0	0	0	0	0	0	0	0	0	0	0	0	0	0	0	0
980	113787	0.923	35.68	38.64	0.727	3.79	5.21	0.711	8.49	11.94	1.089	23.4	21.49	0.441	0.49	1.12	1.132	47.3562	2	2	2	0	0	0	0	0	0	0	0	0	0	0	0	0	0	0	0	0	0	0	0	0	0	0	0	0	0	0	0
981	113799	0.782	34.7	44.38	0.63	3.68	5.85	0.589	8.53	14.49	0.935	22.49	24.04	0.368	0.41	1.12	1.1575	48.094	2	2	2	0	0	0	0	0	0	0	0	0	0	0	0	0	0	0	0	0	0	0	0	0	0	0	0	0	0	0	0
982	113815	0.991	35.79	36.1	0.86	4.31	5.02	0.664	8	12.04	1.233	23.48	19.04	0.574	0.64	1.12	1.1537	46.0345	2	2	2	0	0	0	0	0	0	0	0	0	0	0	0	0	0	0	0	0	0	0	0	0	0	0	0	0	0	0	0
983	113819	0.93	41.99	45.14	0.821	4.49	5.48	0.702	9.87	14.05	1.079	27.63	25.62	0.635	0.8	1.26	1.1536	45.0345	2	2	2	0	0	0	0	0	0	0	0	0	0	0	0	0	0	0	0	0	0	0	0	0	0	0	0	0	0	0	0
984	113825	0.745	24.27	32.57	0.574	2.92	5.09	0.561	6.29	11.22	0.926	15.06	16.26	0.375	0.44	1.17	1.1562	45.5568	2	2	2	0	0	0	0	0	0	0	0	0	0	0	0	0	0	0	0	0	0	0	0	0	0	0	0	0	0	0	0
985	113827	0.789	35.34	44.77	0.573	3.41	5.96	0.602	8.96	14.88	0.96	22.97	23.93	0.399	0.46	1.16	1.1383	51.2523	2	2	2	0	0	0	0	0	0	0	0	0	0	0	0	0	0	0	0	0	0	0	0	0	0	0	0	0	0	0	0
986	113831	0.721	32.02	44.42	0.508	3.05	6.01	0.526	7.82	14.86	0.898	21.16	23.56	0.203	0.23	1.11	1.1468	43.581	2	1	2	0	1	0	0	0	0	0	0	0	0	0	0	21	1	0	0	0	0	0	0	0	0	0	0	0	0	0	0
987	113840	1.007	38.63	38.36	0.749	4.03	5.38	0.768	8.8	11.47	1.199	25.8	21.51	0.635	0.84	1.32	1.1488	45.4283	2	2	2	0	0	0	0	0	0	0	0	0	0	0	0	0	0	0	0	0	0	0	0	0	0	0	0	0	0	0	0
988	113841	0.887	38.5	43.4	0.795	4.72	5.94	0.676	9.77	14.44	1.043	24.01	23.02	0.493	0.57	1.15	1.1356	48.2722	2	2	2	0	0	0	0	0	0	0	0	0	0	0	0	0	0	0	0	0	0	0	0	0	0	0	0	0	0	0	0
989	113843	0.903	26.95	29.85	0.75	3.86	5.15	0.768	7.02	9.15	1.033	16.07	15.56	0.531	0.63	1.18	1.1492	46.6016	2	2	2	0	0	0	0	0	0	0	0	0	0	0	0	0	0	0	0	0	0	0	0	0	0	0	0	0	0	0	0
990	113846	1.049	43.17	41.15	0.868	4.9	5.65	0.834	11.12	13.34	1.225	27.14	22.17	0.663	0.78	1.17	1.1482	44.7234	2	2	1	0	0	1	0	0	0	0	0	0	0	0	0	0	0	0	0	0	0	0	0	0	0	0	0	0	0	0	0
991	113852	1.001	32.05	32.01	0.806	3.87	4.8	0.707	6.48	9.17	1.203	21.7	18.04	0.699	0.82	1.17	1.1493	48.3048	2	2	2	0	0	0	0	0	0	0	0	0	0	0	0	0	0	0	0	0	0	0	0	0	0	0	0	0	0	0	0
992	113854	0.918	23.5	25.6	0.778	3.04	3.91	0.718	5.38	7.49	1.062	15.09	14.2	0.541	0.63	1.17	1.1518	45.9201	2	2	2	0	0	0	0	0	0	0	0	0	0	0	0	0	0	0	0	0	0	0	0	0	0	0	0	0	0	0	0
993	113856	0.889	32.74	36.82	0.653	3.55	5.44	0.598	7.98	13.34	1.175	21.21	18.05	0.755	0.86	1.15	1.1479	43.0145	2	2	2	0	0	0	0	0	0	0	0	0	0	0	0	0	0	0	0	0	0	0	0	0	0	0	0	0	0	0	0
994	113859	0.983	34.11	34.71	0.816	3.77	4.62	0.7	7.15	10.21	1.167	23.19	19.87	0.614	0.71	1.16	1.1423	53.44	2	2	2	0	0	0	0	0	0	0	0	0	0	0	0	0	0	0	0	0	0	0	0	0	0	0	0	0	0	0	0
995	113860	1.059	29.41	27.76	0.844	3.62	4.29	0.804	7.36	9.15	1.287	18.43	14.32	0.737	0.77	1.04	1.1372	52.9491	2	2	2	0	0	0	0	0	0	0	0	0	0	0	0	0	0	0	0	0	0	0	0	0	0	0	0	0	0	0	0
996	113862	0.782	23.63	30.2	0.649	2.91	4.48	0.616	5.47	8.88	0.905	15.25	16.85	0.567	0.73	1.3	1.14	51.3448	2	2	2	0	0	0	0	0	0	0	0	0	0	0	0	0	0	0	0	0	0	0	0	0	0	0	0	0	0	0	0
997	113863	1.013	31.54	31.13	0.863	4.48	5.2	0.821	8.56	10.42	1.193	18.5	15.51	0.73	0.84	1.16	1.1549	46.4555	2	2	2	0	0	0	0	0	0	0	0	0	0	0	0	0	0	0	0	0	0	0	0	0	0	0	0	0	0	0	0
998	113866	0.624	19.31	30.93	0.468	2.3	4.91	0.482	5.84	12.12	0.804	11.17	13.9	0.293	0.34	1.15	1.1476	47.8737	2	2	2	0	0	0	0	0	0	0	0	0	0	0	0	0	0	0	0	0	0	0	0	0	0	0	0	0	0	0	0
999	113869	1.045	47.51	45.47	0.993	6.1	6.15	0.893	13.98	15.65	1.159	27.43	23.67	0.553	0.6	1.09	1.1413	50.3463	2	2	2	0	0	0	0	0	0	0	0	0	0	0	0	0	0	0	0	0	0	0	0	0	0	0	0	0	0	0	0
1000	113870	0.93	35.83	38.52	0.752	3.79	5.04	0.688	7.16	10.4	1.078	24.89	23.09	0.474	0.54	1.14	1.1546	47.0931	2	2	2	0	0	0	0	0	0	0	0	0	0	0	0	0	0	0	0	0	0	0	0	0	0	0	0	0	0	0	0
1001	113871	1.113	45.46	40.85	0.981	5.14	5.24	0.781	9.53	12.21	1.316	30.79	23.4	0.779	0.9	1.15	1.132	48.3275	2	2	2	0	0	0	0	0	0	0	0	0	0	0	0	0	0	0	0	0	0	0	0	0	0	0	0	0	0	0	0
1002	113872	0.702	27.9	39.73	0.665	3.6	5.41	0.527	5.62	10.67	0.79	18.68	23.64	0.457	0.6	1.32	1.1501	44.0309	2	2	2	0	0	0	0	0	0	0	0	0	0	0	0	0	0	0	0	0	0	0	0	0	0	0	0	0	0	0	0
1003	113880	0.791	26.38	33.35	0.579	2.74	4.73	0.557	6.43	11.54	1.007	17.2	17.08	0.379	0.39	1.04	1.1414	47.3438	2	2	2	0	0	0	0	0	0	0	0	0	0	0	0	0	0	0	0	0	0	0	0	0	0	0	0	0	0	0	0
1004	113889	1.039	40.23	38.72	0.813	4.51	5.55	0.758	9.1	12.01	1.258	26.62	21.16	0.496	0.58	1.17	1.1378	43.2207	2	2	2	0	0	0	0	0	0	0	0	0	0	0	0	0	0	0	0	0	0	0	0	0	0	0	0	0	0	0	0
1005	113893	1.083	41.02	37.88	0.844	4.39	5.2	0.82	8.86	10.8	1.27	27.78	21.88	0.659	0.76	1.16	1.1553	45.5395	2	2	2	0	0	0	0	0	0	0	0	0	0	0	0	0	0	0	0	0	0	0	0	0	0	0	0	0	0	0	0
1006	113897	0.966	41.56	43.03	0.779	4.86	6.24	0.7	8.93	12.76	1.155	27.77	24.04	0.516	0.57	1.11	1.1398	51.3381	2	2	2	0	0	0	0	0	0	0	0	0	0	0	0	0	0	0	0	0	0	0	0	0	0	0	0	0	0	0	0
1007	113900	0.908	36.32	40.01	0.709	3.47	4.89	0.728	8.59	11.79	1.04	24.26	23.33	0.522	0.54	1.04	1.1343	47.0989	2	1	2	0	1	0	0	0	0	0	0	0	0	0	0	14	1	0	0	0	0	0	0	0	0	0	0	0	0	0	0
1008	113903	0.722	27.21	37.68	0.575	3.12	5.43	0.613	7	11.43	0.821	17.09	20.82	0.526	0.68	1.3	1.1553	47.6849	2	2	2	0	0	0	0	0	0	0	0	0	0	0	0	0	0	0	0	0	0	0	0	0	0	0	0	0	0	0	0
1009	113904	0.728	22.17	30.45	0.541	2.43	4.48	0.54	5.09	9.44	0.887	14.65	16.52	0.334	0.38	1.12	1.1352	49.2895	2	1	2	0	1	0	0	0	0	0	0	0	0	0	0	46	1	0	0	0	0	0	0	0	0	0	0	0	0	0	0
1010	113911	0.716	24.12	33.66	0.587	2.7	4.6	0.584	5.64	9.65	0.813	15.78	19.41	0.483	0.64	1.32	1.1503	47.4503	2	2	2	0	0	0	0	0	0	0	0	0	0	0	0	0	0	0	0	0	0	0	0	0	0	0	0	0	0	0	0
1011	113913	0.926	27.87	30.08	0.776	3.65	4.7	0.68	6.34	9.32	1.114	17.89	16.06	0.581	0.75	1.3	1.1559	47.3757	1	2	2	1	0	0	35	1	0	0	0	0	0	0	0	0	0	0	0	0	0	0	0	0	0	0	0	0	0	0	0
1012	113921	0.696	20.28	29.15	0.62	2.97	4.78	0.524	5.18	9.89	0.839	12.14	14.47	0.631	0.82	1.3	1.1429	50.0958	2	2	2	0	0	0	0	0	0	0	0	0	0	0	0	0	0	0	0	0	0	0	0	0	0	0	0	0	0	0	0
1013	113922	1.456	63.1	43.35	1.193	6.7	5.62	1.153	15.73	13.65	1.689	40.66	24.08	0.946	1.12	1.19	1.1574	45.1306	2	1	2	0	1	0	0	0	0	0	0	0	0	0	0	11	1	0	0	0	0	0	0	0	0	0	0	0	0	0	0
1014	113936	0.891	37.03	41.57	0.688	4.03	5.86	0.74	8.96	12.12	1.019	24.03	23.6	0.444	0.51	1.14	1.1281	51.3434	2	2	2	0	0	0	0	0	0	0	0	0	0	0	0	0	0	0	0	0	0	0	0	0	0	0	0	0	0	0	0
1015	113943	1.069	48.27	45.13	0.954	5.17	5.42	0.837	11.89	14.21	1.223	31.2	25.51	0.651	0.76	1.16	1.136	51.7724	2	2	2	0	0	0	0	0	0	0	0	0	0	0	0	0	0	0	0	0	0	0	0	0	0	0	0	0	0	0	0
1016	113944	1.036	42.17	40.71	0.836	4.74	5.67	0.795	10.47	13.17	1.232	26.96	21.88	0.657	0.76	1.16	1.1383	49.213	2	2	2	0	0	0	0	0	0	0	0	0	0	0	0	0	0	0	0	0	0	0	0	0	0	0	0	0	0	0	0
1017	113945	0.821	28.7	34.94	0.71	3.97	5.59	0.633	7.33	11.58	0.979	17.4	17.77	0.664	0.86	1.3	1.1324	47.1925	2	1	2	0	1	0	0	0	0	0	0	0	0	0	0	50	2	2	0	0	0	0	0	0	0	0	0	0	0	0	0
1018	113957	0.91	42.55	46.77	0.829	4.95	5.97	0.683	9.96	14.57	1.054	27.64	26.23	0.553	0.65	1.17	1.1318	49.7585	2	2	2	0	0	0	0	0	0	0	0	0	0	0	0	0	0	0	0	0	0	0	0	0	0	0	0	0	0	0	0
1019	113968	0.622	20.8	33.45	0.486	2.19	4.51	0.498	5.71	11.47	0.738	12.9	17.47	0.375	0.49	1.3	1.1392	53.2755	2	2	2	0	0	0	0	0	0	0	0	0	0	0	0	0	0	0	0	0	0	0	0	0	0	0	0	0	0	0	0
1020	113971	1.179	47.25	40.08	0.925	5.4	5.84	0.799	9.77	12.22	1.457	32.08	22.02	0.697	0.78	1.12	1.1325	46.128	2	2	2	0	0	0	0	0	0	0	0	0	0	0	0	0	0	0	0	0	0	0	0	0	0	0	0	0	0	0	0
1021	113973	0.739	26.37	35.66	0.603	2.65	4.39	0.505	5.29	10.47	0.886	18.43	20.8	0.417	0.47	1.14	1.1373	46.5882	2	2	2	0	0	0	0	0	0	0	0	0	0	0	0	0	0	0	0	0	0	0	0	0	0	0	0	0	0	0	0
1022	113978	0.633	20.43	32.27	0.52	2.71	5.22	0.504	5.64	11.19	0.762	12.08	15.86	0.393	0.41	1.05	1.1495	46.8535	1	2	2	1	0	0	77	2	1	0	0	0	0	0	0	0	0	0	0	0	0	0	0	0	0	0	0	0	0	0	0
1023	113982	1.066	37.85	35.51	0.946	4.7	4.97	0.799	9.53	11.93	1.27	23.62	18.6	0.721	0.81	1.12	1.1273	48.2821	2	2	2	0	0	0	0	0	0	0	0	0	0	0	0	0	0	0	0	0	0	0	0	0	0	0	0	0	0	0	0
1024	113983	0.891	28.36	31.83	0.64	3.38	5.29	0.653	6.85	10.5	1.13	18.13	16.04	0.456	0.53	1.16	1.1562	46.6836	2	2	2	0	0	0	0	0	0	0	0	0	0	0	0	0	0	0	0	0	0	0	0	0	0	0	0	0	0	0	0
1025	113986	0.861	35.34	41.03	0.729	3.89	5.33	0.664	7.37	11.1	0.979	24.08	24.6	0.471	0.55	1.16	1.1447	43.0227	2	2	2	0	0	0	0	0	0	0	0	0	0	0	0	0	0	0	0	0	0	0	0	0	0	0	0	0	0	0	0
1026	113998	0.879	25.93	29.49	0.725	3.43	4.74	0.68	6.48	9.52	1.052	16.02	15.23	0.502	0.52	1.04	1.1445	51.3887	2	1	2	0	2	0	0	0	0	0	0	0	0	0	0	13	1	0	26	1	0	0	0	0	0	0	0	0	0	0	0
1027	114008	1.03	44.41	43.11	0.798	4.25	5.32	0.779	10.72	13.78	1.226	29.43	24.01	0.55	0.63	1.14	1.1313	48.6295	2	2	2	0	0	0	0	0	0	0	0	0	0	0	0	0	0	0	0	0	0	0	0	0	0	0	0	0	0	0	0
1028	114015	1.141	47.95	42.01	0.944	5.48	5.8	0.876	10.74	12.26	1.325	31.74	23.95	0.513	0.57	1.12	1.1302	50.4209	2	2	2	0	0	0	0	0	0	0	0	0	0	0	0	0	0	0	0	0	0	0	0	0	0	0	0	0	0	0	0
1029	114019	0.941	43.63	46.35	0.684	4.24	6.2	0.71	12.75	17.97	1.201	26.64	22.18	0.441	0.51	1.17	1.1575	47.7602	2	2	2	0	0	0	0	0	0	0	0	0	0	0	0	0	0	0	0	0	0	0	0	0	0	0	0	0	0	0	0
1030	114021	0.852	39.48	46.33	0.693	4.35	6.28	0.596	8.96	15.02	1.046	26.17	25.03	0.435	0.5	1.16	1.1394	47.989	2	2	2	0	0	0	0	0	0	0	0	0	0	0	0	0	0	0	0	0	0	0	0	0	0	0	0	0	0	0	0
1031	114023	1.151	60.57	52.62	0.897	6.32	7.05	0.934	14.49	15.51	1.322	39.76	30.07	0.536	0.63	1.18	1.1459	43.4099	2	2	2	0	0	0	0	0	0	0	0	0	0	0	0	0	0	0	0	0	0	0	0	0	0	0	0	0	0	0	0
1032	114027	0.953	38.39	40.29	0.81	4.3	5.31	0.693	8.54	12.33	1.128	25.55	22.65	0.52	0.61	1.17	1.1547	44.4288	2	2	2	0	0	0	0	0	0	0	0	0	0	0	0	0	0	0	0	0	0	0	0	0	0	0	0	0	0	0	0
1033	114028	0.855	35.95	42.04	0.631	3.3	5.23	0.64	7.92	12.37	1.012	24.73	24.44	0.453	0.52	1.15	1.1593	46.5996	2	2	2	0	0	0	0	0	0	0	0	0	0	0	0	0	0	0	0	0	0	0	0	0	0	0	0	0	0	0	0
1034	114031	0.989	46.2	46.72	0.745	4.62	6.2	0.778	11.47	14.74	1.168	30.11	25.78	0.461	0.5	1.1	1.1577	45.9799	2	2	2	0	0	0	0	0	0	0	0	0	0	0	0	0	0	0	0	0	0	0	0	0	0	0	0	0	0	0	0
1035	114032	1.071	35.25	32.92	0.998	4.89	4.9	0.84	8.3	9.88	1.216	22.07	18.14	0.822	0.95	1.16	1.1318	46.8444	2	2	2	0	0	0	0	0	0	0	0	0	0	0	0	0	0	0	0	0	0	0	0	0	0	0	0	0	0	0	0
1036	114036	1.018	37.29	36.63	0.753	4.27	5.67	0.766	8.69	11.35	1.241	24.33	19.61	0.545	0.66	1.22	1.1294	44.5319	2	2	2	0	0	0	0	0	0	0	0	0	0	0	0	0	0	0	0	0	0	0	0	0	0	0	0	0	0	0	0
1037	114038	0.789	28.29	35.86	0.607	3.15	5.2	0.551	6.17	11.21	0.975	18.97	19.46	0.517	0.67	1.3	1.1558	47.7708	2	2	2	0	0	0	0	0	0	0	0	0	0	0	0	0	0	0	0	0	0	0	0	0	0	0	0	0	0	0	0
1038	114039	1.3	56.31	43.31	1.074	6	5.59	0.988	11.83	11.97	1.494	38.48	25.75	0.944	1.22	1.3	1.1307	46.7375	2	2	2	0	0	0	0	0	0	0	0	0	0	0	0	0	0	0	0	0	0	0	0	0	0	0	0	0	0	0	0
1039	114040	1.038	37.01	35.64	0.903	4.6	5.1	0.819	9.65	11.78	1.213	22.76	18.77	0.724	0.84	1.17	1.1308	45.4646	1	1	2	1	1	0	54	2	1	0	0	0	0	0	0	58	2	1	0	0	0	0	0	0	0	0	0	0	0	0	0
1040	114042	0.93	31.96	34.37	0.737	3.94	5.34	0.637	7.04	11.05	1.168	20.98	17.97	0.508	0.6	1.17	1.1395	49.2755	2	2	2	0	0	0	0	0	0	0	0	0	0	0	0	0	0	0	0	0	0	0	0	0	0	0	0	0	0	0	0
1041	114043	0.9	27.75	30.82	0.743	3.16	4.26	0.67	6.52	9.73	1.073	18.06	16.83	0.425	0.49	1.15	1.1401	49.7687	2	2	2	0	0	0	0	0	0	0	0	0	0	0	0	0	0	0	0	0	0	0	0	0	0	0	0	0	0	0	0
1042	114049	1.097	34.62	31.58	0.967	4.75	4.91	0.78	8.28	10.61	1.346	21.6	16.05	0.811	0.84	1.03	1.1406	46.9468	2	2	2	0	0	0	0	0	0	0	0	0	0	0	0	0	0	0	0	0	0	0	0	0	0	0	0	0	0	0	0
1043	114052	0.765	30.98	40.51	0.641	3.7	5.77	0.529	7.16	13.54	0.949	20.13	21.2	0.384	0.45	1.16	1.138	54.0251	2	2	2	0	0	0	0	0	0	0	0	0	0	0	0	0	0	0	0	0	0	0	0	0	0	0	0	0	0	0	0
1044	114054	1.315	61.55	46.81	1.124	6.73	5.99	1.079	16.35	15.16	1.499	38.48	25.67	0.848	0.98	1.16	1.155	45.0929	2	1	2	0	1	0	0	0	0	0	0	0	0	0	0	11	1	0	0	0	0	0	0	0	0	0	0	0	0	0	0
1045	114058	0.986	46.19	46.85	0.817	4.15	5.08	0.752	18.68	24.83	1.379	23.36	16.94	0.47	0.56	1.18	1.1435	52.6277	2	2	2	0	0	0	0	0	0	0	0	0	0	0	0	0	0	0	0	0	0	0	0	0	0	0	0	0	0	0	0
1046	114059	1.038	37.21	35.84	0.842	4.1	4.87	0.83	9.26	11.16	1.205	23.86	19.8	0.763	0.8	1.05	1.1505	46.1142	2	2	2	0	0	0	0	0	0	0	0	0	0	0	0	0	0	0	0	0	0	0	0	0	0	0	0	0	0	0	0
1047	114067	0.857	30.12	35.17	0.701	3.62	5.16	0.547	5.51	10.07	1.053	21	19.94	0.376	0.44	1.17	1.1528	46.2431	2	2	2	0	0	0	0	0	0	0	0	0	0	0	0	0	0	0	0	0	0	0	0	0	0	0	0	0	0	0	0
1048	114082	0.876	33.77	38.54	0.721	3.71	5.15	0.721	9.49	13.16	1.017	20.57	20.23	0.521	0.54	1.04	1.136	49.6775	2	2	2	0	0	0	0	0	0	0	0	0	0	0	0	0	0	0	0	0	0	0	0	0	0	0	0	0	0	0	0
1049	114083	1.057	40.84	38.63	0.733	3.88	5.3	0.936	10.2	10.9	1.192	26.75	22.44	0.557	0.63	1.13	1.1472	44.8658	2	2	2	0	0	0	0	0	0	0	0	0	0	0	0	0	0	0	0	0	0	0	0	0	0	0	0	0	0	0	0
1050	114084	0.754	22.49	29.82	0.57	2.69	4.72	0.567	4.93	8.69	0.907	14.88	16.41	0.311	0.35	1.12	1.143	51.5394	2	2	2	0	0	0	0	0	0	0	0	0	0	0	0	0	0	0	0	0	0	0	0	0	0	0	0	0	0	0	0
1051	114090	0.796	23.44	29.43	0.683	3.07	4.49	0.585	5.39	9.22	0.953	14.98	15.72	0.409	0.48	1.16	1.1467	44.4766	2	1	2	0	1	0	0	0	0	0	0	0	0	0	0	12	1	0	0	0	0	0	0	0	0	0	0	0	0	0	0
1052	114096	0.897	45.65	50.89	0.76	4.44	5.84	0.642	9.93	15.46	1.057	31.28	29.59	0.424	0.47	1.12	1.1383	48.3974	2	2	2	0	0	0	0	0	0	0	0	0	0	0	0	0	0	0	0	0	0	0	0	0	0	0	0	0	0	0	0
1053	114098	0.865	25.81	29.84	0.75	3.38	4.5	0.626	5.31	8.48	1.016	17.13	16.86	0.581	0.68	1.17	1.1417	51.4492	2	2	2	0	0	0	0	0	0	0	0	0	0	0	0	0	0	0	0	0	0	0	0	0	0	0	0	0	0	0	0
1054	114104	0.742	32.54	43.88	0.629	3.79	6.03	0.47	6.53	13.91	0.928	22.22	23.94	0.329	0.38	1.17	1.1517	45.9559	2	2	2	0	0	0	0	0	0	0	0	0	0	0	0	0	0	0	0	0	0	0	0	0	0	0	0	0	0	0	0
1055	114105	0.853	23.46	27.49	0.77	3.56	4.63	0.711	5.96	8.38	0.963	13.94	14.48	0.505	0.59	1.17	1.142	42.6206	2	2	2	0	0	0	0	0	0	0	0	0	0	0	0	0	0	0	0	0	0	0	0	0	0	0	0	0	0	0	0
1056	114106	0.88	28.41	32.28	0.682	3.12	4.57	0.632	6.44	10.19	1.076	18.85	17.52	0.477	0.56	1.17	1.1385	53.1507	1	2	2	1	0	0	35	1	0	0	0	0	0	0	0	0	0	0	0	0	0	0	0	0	0	0	0	0	0	0	0
1057	114123	1.182	38.86	32.87	1.004	5.14	5.12	0.969	10.31	10.64	1.368	23.41	17.11	0.793	0.93	1.17	1.1476	43.4056	2	2	2	0	0	0	0	0	0	0	0	0	0	0	0	0	0	0	0	0	0	0	0	0	0	0	0	0	0	0	0
1058	114128	1.065	57.31	53.79	0.845	5.85	6.93	0.789	11.48	14.54	1.237	39.98	32.32	0.609	0.68	1.12	1.1342	50.9626	2	2	2	0	0	0	0	0	0	0	0	0	0	0	0	0	0	0	0	0	0	0	0	0	0	0	0	0	0	0	0
1059	114130	0.723	22.65	31.35	0.606	2.86	4.72	0.524	5.16	9.86	0.872	14.63	16.77	0.492	0.51	1.04	1.1414	51.5303	2	2	2	0	0	0	0	0	0	0	0	0	0	0	0	0	0	0	0	0	0	0	0	0	0	0	0	0	0	0	0
1060	114133	0.84	31.67	37.71	0.675	3.67	5.43	0.63	8.01	12.7	1.021	20	19.58	0.493	0.58	1.17	1.1372	48.8306	2	2	2	0	0	0	0	0	0	0	0	0	0	0	0	0	0	0	0	0	0	0	0	0	0	0	0	0	0	0	0
1061	114141	0.892	38.63	43.32	0.735	4.42	6.02	0.729	9.99	13.71	1.026	24.21	23.6	0.541	0.63	1.17	1.1452	44.8052	2	2	2	0	0	0	0	0	0	0	0	0	0	0	0	0	0	0	0	0	0	0	0	0	0	0	0	0	0	0	0
1062	114145	0.854	33.09	38.73	0.715	3.63	5.08	0.722	8.63	11.96	0.96	20.84	21.7	0.55	0.64	1.16	1.1569	46.8688	2	2	2	0	0	0	0	0	0	0	0	0	0	0	0	0	0	0	0	0	0	0	0	0	0	0	0	0	0	0	0
1063	114147	1	32.18	32.19	0.858	3.77	4.39	0.753	6.85	9.1	1.153	21.56	18.7	0.672	0.75	1.12	1.1351	52.1779	2	2	1	0	0	1	0	0	0	0	0	0	0	0	0	0	0	0	0	0	0	0	0	0	0	0	0	0	0	0	0
1064	114148	0.838	33.19	39.63	0.628	3.5	5.58	0.636	8	12.59	1.011	21.69	21.46	0.436	0.49	1.12	1.1289	51.2809	2	1	2	0	1	0	0	0	0	0	0	0	0	0	0	76	2	1	0	0	0	0	0	0	0	0	0	0	0	0	0
1065	114162	1.151	51.05	44.35	1.156	6.22	5.38	0.807	10.85	13.44	1.331	33.98	25.53	0.724	0.84	1.16	1.1291	48.0907	2	2	2	0	0	0	0	0	0	0	0	0	0	0	0	0	0	0	0	0	0	0	0	0	0	0	0	0	0	0	0
1066	114163	1.026	30.04	29.28	0.884	4.34	4.91	0.775	7.43	9.58	1.236	18.28	14.78	0.782	1.02	1.3	1.1396	54.1467	2	2	2	0	0	0	0	0	0	0	0	0	0	0	0	0	0	0	0	0	0	0	0	0	0	0	0	0	0	0	0
1067	114165	0.969	46	47.46	0.817	4.74	5.81	0.644	9.93	15.42	1.194	31.33	26.24	0.667	0.87	1.3	1.139	48.4583	2	2	2	0	0	0	0	0	0	0	0	0	0	0	0	0	0	0	0	0	0	0	0	0	0	0	0	0	0	0	0
1068	114169	1.102	48.56	44.06	0.805	4.6	5.72	0.766	9.89	12.92	1.34	34.06	25.42	0.616	0.73	1.18	1.147	46.9474	2	2	2	0	0	0	0	0	0	0	0	0	0	0	0	0	0	0	0	0	0	0	0	0	0	0	0	0	0	0	0
1069	114172	1.005	43.77	43.57	0.814	4.58	5.63	0.785	9.8	12.49	1.155	29.39	25.45	0.62	0.72	1.17	1.1394	48.6256	2	2	2	0	0	0	0	0	0	0	0	0	0	0	0	0	0	0	0	0	0	0	0	0	0	0	0	0	0	0	0
1070	114173	1.102	47.24	42.88	1.016	5.86	5.77	0.795	11.53	14.5	1.32	29.86	22.61	0.947	1.23	1.3	1.1368	49.5914	2	2	2	0	0	0	0	0	0	0	0	0	0	0	0	0	0	0	0	0	0	0	0	0	0	0	0	0	0	0	0
1071	114178	1.057	43.31	40.97	0.767	4.2	5.48	0.815	10.55	12.93	1.267	28.57	22.56	0.496	0.58	1.16	1.1348	49.105	2	2	2	0	0	0	0	0	0	0	0	0	0	0	0	0	0	0	0	0	0	0	0	0	0	0	0	0	0	0	0
1072	114179	1.368	67.83	49.57	1.303	7.66	5.88	1.046	15.31	14.64	1.544	44.85	29.05	0.884	0.97	1.1	1.1312	48.3806	2	1	2	0	2	0	0	0	0	0	0	0	0	0	0	21	1	0	60	2	2	0	0	0	0	0	0	0	0	0	0
1073	114181	1.054	43.93	41.7	0.826	4.64	5.62	0.772	9.68	12.53	1.258	29.62	23.55	0.827	1.09	1.32	1.1453	43.3205	2	2	2	0	0	0	0	0	0	0	0	0	0	0	0	0	0	0	0	0	0	0	0	0	0	0	0	0	0	0	0
1074	114182	0.895	28.33	31.64	0.776	3.62	4.66	0.766	7.22	9.43	0.996	17.48	17.55	0.466	0.5	1.08	1.1268	50.4643	2	2	2	0	0	0	0	0	0	0	0	0	0	0	0	0	0	0	0	0	0	0	0	0	0	0	0	0	0	0	0
1075	114186	0.891	37.98	42.61	0.788	4.29	5.45	0.676	9.78	14.48	1.054	23.9	22.68	0.467	0.52	1.11	1.1358	51.0696	2	2	2	0	0	0	0	0	0	0	0	0	0	0	0	0	0	0	0	0	0	0	0	0	0	0	0	0	0	0	0
1076	114203	0.91	35.52	39.02	0.742	3.92	5.28	0.601	6.87	11.42	1.109	24.73	22.31	0.411	0.48	1.16	1.1413	52.1569	2	2	2	0	0	0	0	0	0	0	0	0	0	0	0	0	0	0	0	0	0	0	0	0	0	0	0	0	0	0	0
1077	114212	0.615	17.32	28.15	0.469	2.16	4.62	0.534	6.19	11.59	0.751	8.96	11.94	0.34	0.41	1.22	1.1487	45.9152	2	2	2	0	0	0	0	0	0	0	0	0	0	0	0	0	0	0	0	0	0	0	0	0	0	0	0	0	0	0	0
1078	114213	1.108	59.18	53.42	0.886	5.51	6.22	0.836	14.59	17.44	1.313	39.08	29.76	0.678	0.71	1.05	1.1466	43.6018	2	2	2	0	0	0	0	0	0	0	0	0	0	0	0	0	0	0	0	0	0	0	0	0	0	0	0	0	0	0	0
1079	114219	0.895	30.57	34.15	0.722	3.53	4.89	0.618	5.69	9.21	1.065	21.35	20.05	0.474	0.52	1.1	1.1434	49.2301	2	2	2	0	0	0	0	0	0	0	0	0	0	0	0	0	0	0	0	0	0	0	0	0	0	0	0	0	0	0	0
1080	114231	0.993	29.74	29.94	0.86	4.03	4.69	0.753	7.73	10.26	1.199	17.98	14.99	0.745	0.86	1.15	1.1528	46.3125	2	2	2	0	0	0	0	0	0	0	0	0	0	0	0	0	0	0	0	0	0	0	0	0	0	0	0	0	0	0	0
1081	114235	1.183	47.4	40.06	0.953	5.21	5.47	0.956	10.11	10.57	1.336	32.09	24.02	0.703	0.8	1.13	1.1403	42.168	2	2	2	0	0	0	0	0	0	0	0	0	0	0	0	0	0	0	0	0	0	0	0	0	0	0	0	0	0	0	0
1082	114237	1.015	35.28	34.75	0.708	3.87	5.47	0.758	9.36	12.35	1.302	22.04	16.93	0.605	0.63	1.04	1.1364	49.9943	2	2	2	0	0	0	0	0	0	0	0	0	0	0	0	0	0	0	0	0	0	0	0	0	0	0	0	0	0	0	0
1083	114240	0.64	22.5	35.17	0.483	2.26	4.67	0.51	5.65	11.07	0.752	14.6	19.43	0.33	0.37	1.14	1.1573	45.3917	1	2	2	1	0	0	74	2	2	0	0	0	0	0	0	0	0	0	0	0	0	0	0	0	0	0	0	0	0	0	0
1084	114247	0.978	37.47	38.32	0.758	4	5.28	0.639	8.19	12.81	1.25	25.28	20.23	0.409	0.45	1.1	1.1411	48.7489	2	2	2	0	0	0	0	0	0	0	0	0	0	0	0	0	0	0	0	0	0	0	0	0	0	0	0	0	0	0	0
1085	114248	1.145	41.77	36.48	0.903	5.05	5.59	0.853	11.94	14	1.467	24.78	16.89	0.647	0.73	1.12	1.1511	46.5637	2	2	2	0	0	0	0	0	0	0	0	0	0	0	0	0	0	0	0	0	0	0	0	0	0	0	0	0	0	0	0
1086	114251	1.047	43.77	41.81	0.874	4.89	5.6	0.795	9.5	11.95	1.211	29.38	24.27	0.647	0.68	1.05	1.1462	44.4114	2	2	2	0	0	0	0	0	0	0	0	0	0	0	0	0	0	0	0	0	0	0	0	0	0	0	0	0	0	0	0
1087	114254	0.802	24.2	30.17	0.667	3.23	4.85	0.604	6.05	10.02	0.975	14.92	15.3	0.537	0.56	1.04	1.1399	49.9928	2	2	2	0	0	0	0	0	0	0	0	0	0	0	0	0	0	0	0	0	0	0	0	0	0	0	0	0	0	0	0
1088	114269	0.874	26.6	30.45	0.667	3.01	4.51	0.712	6.76	9.5	1.024	16.83	16.44	0.514	0.68	1.32	1.1465	45.0021	2	2	2	0	0	0	0	0	0	0	0	0	0	0	0	0	0	0	0	0	0	0	0	0	0	0	0	0	0	0	0
1089	114273	1.211	50.23	41.47	0.975	5.48	5.62	0.919	12.37	13.47	1.446	32.38	22.38	0.789	0.92	1.17	1.1335	48.6506	2	2	2	0	0	0	0	0	0	0	0	0	0	0	0	0	0	0	0	0	0	0	0	0	0	0	0	0	0	0	0
1090	114274	0.851	28.19	33.14	0.717	3.29	4.59	0.609	5.78	9.49	1.003	19.12	19.06	0.492	0.55	1.12	1.1384	49.6767	2	2	2	0	0	0	0	0	0	0	0	0	0	0	0	0	0	0	0	0	0	0	0	0	0	0	0	0	0	0	0
1091	114279	1.171	52.86	45.13	0.942	5.46	5.8	0.901	13.95	15.48	1.403	33.45	23.85	0.65	0.76	1.16	1.1398	50.0194	2	2	2	0	0	0	0	0	0	0	0	0	0	0	0	0	0	0	0	0	0	0	0	0	0	0	0	0	0	0	0
1092	114285	0.793	26.43	33.33	0.777	3.87	4.99	0.636	6.01	9.44	0.876	16.55	18.91	0.647	0.84	1.3	1.1422	52.2545	2	2	2	0	0	0	0	0	0	0	0	0	0	0	0	0	0	0	0	0	0	0	0	0	0	0	0	0	0	0	0
1093	114293	1.263	43.2	34.21	1.091	5.25	4.81	0.966	10.12	10.48	1.471	27.83	18.92	0.919	1.07	1.16	1.1317	51.3905	2	2	2	0	0	0	0	0	0	0	0	0	0	0	0	0	0	0	0	0	0	0	0	0	0	0	0	0	0	0	0
1094	114297	0.877	36.34	41.42	0.611	3.41	5.58	0.708	9.16	12.95	1.039	23.78	22.9	0.387	0.45	1.17	1.1455	44.7254	2	2	2	0	0	0	0	0	0	0	0	0	0	0	0	0	0	0	0	0	0	0	0	0	0	0	0	0	0	0	0
1095	114298	0.792	26.65	33.66	0.749	3.51	4.68	0.604	6.18	10.24	0.905	16.96	18.75	0.485	0.56	1.15	1.1445	51.973	2	2	2	0	0	0	0	0	0	0	0	0	0	0	0	0	0	0	0	0	0	0	0	0	0	0	0	0	0	0	0
1096	114300	0.547	15.44	28.22	0.46	1.98	4.32	0.428	4.87	11.39	0.686	8.59	12.52	0.288	0.33	1.16	1.1387	56.9023	2	2	2	0	0	0	0	0	0	0	0	0	0	0	0	0	0	0	0	0	0	0	0	0	0	0	0	0	0	0	0
1097	114305	0.899	32.21	35.85	0.653	3.55	5.43	0.683	6.98	10.23	1.074	21.68	20.19	0.568	0.74	1.3	1.1476	50.892	2	2	2	0	0	0	0	0	0	0	0	0	0	0	0	0	0	0	0	0	0	0	0	0	0	0	0	0	0	0	0
1098	114307	0.689	30.02	43.59	0.612	3.62	5.92	0.464	6.95	14.97	0.857	19.45	22.7	0.331	0.37	1.11	1.1428	52.0126	2	1	2	0	1	0	0	0	0	0	0	0	0	0	0	20	1	0	0	0	0	0	0	0	0	0	0	0	0	0	0
1099	114311	0.923	36.86	39.94	0.729	4.16	5.72	0.661	9.42	14.26	1.165	23.27	19.97	0.495	0.57	1.15	1.1475	51.9733	2	2	2	0	0	0	0	0	0	0	0	0	0	0	0	0	0	0	0	0	0	0	0	0	0	0	0	0	0	0	0
1100	114323	0.701	22.31	31.83	0.634	3.12	4.93	0.502	6.25	12.44	0.894	12.94	14.47	0.412	0.43	1.04	1.1438	54.136	2	2	2	0	0	0	0	0	0	0	0	0	0	0	0	0	0	0	0	0	0	0	0	0	0	0	0	0	0	0	0
1101	114324	0.837	24.76	29.59	0.734	3.59	4.89	0.663	5.74	8.66	0.962	15.42	16.03	0.473	0.55	1.17	1.154	47.7829	2	2	2	0	0	0	0	0	0	0	0	0	0	0	0	0	0	0	0	0	0	0	0	0	0	0	0	0	0	0	0
1102	114331	0.815	26.85	32.95	0.708	3.42	4.83	0.643	6.01	9.34	0.928	17.42	18.78	0.593	0.77	1.3	1.1336	50.5503	2	2	2	0	0	0	0	0	0	0	0	0	0	0	0	0	0	0	0	0	0	0	0	0	0	0	0	0	0	0	0
1103	114332	0.887	36.45	41.07	0.815	4.77	5.85	0.684	8.08	11.81	1.008	23.6	23.41	0.725	0.94	1.3	1.1374	49.2108	2	2	2	0	0	0	0	0	0	0	0	0	0	0	0	0	0	0	0	0	0	0	0	0	0	0	0	0	0	0	0
1104	114334	0.717	21.42	29.87	0.689	2.75	3.99	0.469	3.86	8.22	0.839	14.81	17.66	0.54	0.7	1.3	1.137	49.9206	2	2	2	0	0	0	0	0	0	0	0	0	0	0	0	0	0	0	0	0	0	0	0	0	0	0	0	0	0	0	0
1105	114346	0.928	33.18	35.76	0.736	3.79	5.15	0.751	8.56	11.4	1.084	20.83	19.22	0.524	0.61	1.17	1.1582	46.607	2	2	2	0	0	0	0	0	0	0	0	0	0	0	0	0	0	0	0	0	0	0	0	0	0	0	0	0	0	0	0
1106	114349	0.79	21.14	26.74	0.567	2.53	4.45	0.612	4.9	8.02	0.961	13.71	14.27	0.483	0.5	1.04	1.1539	47.5121	2	2	2	0	0	0	0	0	0	0	0	0	0	0	0	0	0	0	0	0	0	0	0	0	0	0	0	0	0	0	0
1107	114351	0.808	25.1	31.07	0.741	2.44	3.29	0.617	6.46	10.48	0.937	16.2	17.3	0.653	0.85	1.3	1.1306	46.734	2	2	2	0	0	0	0	0	0	0	0	0	0	0	0	0	0	0	0	0	0	0	0	0	0	0	0	0	0	0	0
1108	114352	0.978	30.17	30.85	0.776	3.68	4.74	0.691	5.95	8.61	1.173	20.53	17.5	0.605	0.78	1.3	1.1556	49.2439	2	2	2	0	0	0	0	0	0	0	0	0	0	0	0	0	0	0	0	0	0	0	0	0	0	0	0	0	0	0	0
1109	114353	0.917	37.76	41.18	0.707	4.01	5.66	0.704	10.11	14.36	1.117	23.65	21.16	0.478	0.5	1.05	1.1361	49.719	2	1	2	0	2	0	0	0	0	0	0	0	0	0	0	10	1	0	15	1	0	0	0	0	0	0	0	0	0	0	0
1110	114357	0.612	17.73	28.95	0.475	2.03	4.27	0.466	4.34	9.3	0.739	11.36	15.38	0.253	0.29	1.13	1.1531	46.6674	2	2	2	0	0	0	0	0	0	0	0	0	0	0	0	0	0	0	0	0	0	0	0	0	0	0	0	0	0	0	0
1111	114363	0.939	49.03	52.22	0.723	4.23	5.85	0.695	11.31	16.27	1.113	33.49	30.1	0.628	0.65	1.04	1.1554	43.3761	2	2	2	0	0	0	0	0	0	0	0	0	0	0	0	0	0	0	0	0	0	0	0	0	0	0	0	0	0	0	0
1112	114364	0.952	42.11	44.25	0.693	3.98	5.75	0.664	9.47	14.27	1.183	28.65	24.23	0.404	0.47	1.17	1.1376	49.6218	2	2	2	0	0	0	0	0	0	0	0	0	0	0	0	0	0	0	0	0	0	0	0	0	0	0	0	0	0	0	0
1113	114366	0.859	30.34	35.34	0.687	3.31	4.82	0.654	7.36	11.25	1.021	19.67	19.26	0.46	0.55	1.18	1.1518	46.449	2	2	2	0	0	0	0	0	0	0	0	0	0	0	0	0	0	0	0	0	0	0	0	0	0	0	0	0	0	0	0
1114	114369	0.828	25.3	30.55	0.684	3.35	4.89	0.572	6.16	10.77	1.062	15.8	14.88	0.59	0.62	1.05	1.1487	46.9865	2	2	2	0	0	0	0	0	0	0	0	0	0	0	0	0	0	0	0	0	0	0	0	0	0	0	0	0	0	0	0
1115	114384	0.826	27.38	33.14	0.68	3.61	5.31	0.611	6.64	10.87	1.01	17.13	16.96	0.481	0.5	1.04	1.1347	52.887	2	2	2	0	0	0	0	0	0	0	0	0	0	0	0	0	0	0	0	0	0	0	0	0	0	0	0	0	0	0	0
1116	114386	0.743	31.15	41.91	0.592	3.43	5.8	0.612	7.17	11.72	0.842	20.55	24.39	0.527	0.68	1.3	1.1576	48.2519	2	2	2	0	0	0	0	0	0	0	0	0	0	0	0	0	0	0	0	0	0	0	0	0	0	0	0	0	0	0	0
1117	114389	0.906	35.17	38.82	0.74	3.87	5.23	0.638	8.13	12.73	1.111	23.17	20.85	0.473	0.56	1.17	1.1477	44.2881	2	2	2	0	0	0	0	0	0	0	0	0	0	0	0	0	0	0	0	0	0	0	0	0	0	0	0	0	0	0	0
1118	114403	0.871	28.72	32.95	0.762	3.81	5.01	0.578	5.73	9.91	1.063	19.17	18.04	0.593	0.68	1.14	1.146	54.7223	2	2	2	0	0	0	0	0	0	0	0	0	0	0	0	0	0	0	0	0	0	0	0	0	0	0	0	0	0	0	0
1119	114404	1.254	54.3	43.29	0.996	5.91	5.94	0.899	12.47	13.88	1.53	35.91	23.47	0.756	0.78	1.04	1.1342	45.3007	2	2	2	0	0	0	0	0	0	0	0	0	0	0	0	0	0	0	0	0	0	0	0	0	0	0	0	0	0	0	0
1120	114406	1.137	39.94	35.14	0.955	5.29	5.54	0.799	10.28	12.87	1.456	24.37	16.74	0.73	0.81	1.12	1.1312	48.3977	2	2	2	0	0	0	0	0	0	0	0	0	0	0	0	0	0	0	0	0	0	0	0	0	0	0	0	0	0	0	0
1121	114407	0.946	37.77	39.91	0.718	3.84	5.35	0.704	9.35	13.28	1.155	24.58	21.29	0.521	0.6	1.16	1.152	45.3779	2	2	2	0	0	0	0	0	0	0	0	0	0	0	0	0	0	0	0	0	0	0	0	0	0	0	0	0	0	0	0
1122	114409	1.134	37.85	33.36	1.036	3.95	3.81	0.954	10.46	10.96	1.261	23.45	18.6	0.97	1.12	1.15	1.1489	45.3035	2	2	2	0	0	0	0	0	0	0	0	0	0	0	0	0	0	0	0	0	0	0	0	0	0	0	0	0	0	0	0
1123	114410	1.039	50.39	48.49	0.882	5.4	6.12	0.792	12.33	15.57	1.219	32.66	26.8	0.756	1	1.32	1.1449	45.1065	2	2	2	0	0	0	0	0	0	0	0	0	0	0	0	0	0	0	0	0	0	0	0	0	0	0	0	0	0	0	0
1124	114413	0.607	19.58	32.26	0.55	2.91	5.3	0.49	5.26	10.75	0.704	11.4	16.21	0.311	0.37	1.18	1.1454	53.768	1	2	2	1	0	0	56	2	1	0	0	0	0	0	0	0	0	0	0	0	0	0	0	0	0	0	0	0	0	0	0
1125	114414	0.816	30.45	37.34	0.622	3.05	4.9	0.66	7.14	10.82	0.938	20.26	21.61	0.435	0.5	1.16	1.1581	47.7904	2	2	2	0	0	0	0	0	0	0	0	0	0	0	0	0	0	0	0	0	0	0	0	0	0	0	0	0	0	0	0
1126	114420	0.809	26.7	33.01	0.659	3.45	5.23	0.518	5.64	10.89	1.043	17.61	16.88	0.535	0.56	1.05	1.1478	47.6256	2	2	2	0	0	0	0	0	0	0	0	0	0	0	0	0	0	0	0	0	0	0	0	0	0	0	0	0	0	0	0
1127	114423	0.734	24.43	33.29	0.572	2.85	4.98	0.561	6.44	11.49	0.9	15.14	16.82	0.365	0.43	1.17	1.15	47.6135	2	2	2	0	0	0	0	0	0	0	0	0	0	0	0	0	0	0	0	0	0	0	0	0	0	0	0	0	0	0	0
1128	114429	0.944	31.46	33.32	1.226	6.76	5.52	0.683	6.03	8.84	0.984	18.66	18.96	0.59	0.65	1.1	1.1442	44.0811	2	2	2	0	0	0	0	0	0	0	0	0	0	0	0	0	0	0	0	0	0	0	0	0	0	0	0	0	0	0	0
1129	114431	0.804	24.62	30.62	0.64	3.21	5.02	0.606	5.87	9.68	0.976	15.55	15.92	0.44	0.49	1.12	1.1309	49.883	2	2	2	0	0	0	0	0	0	0	0	0	0	0	0	0	0	0	0	0	0	0	0	0	0	0	0	0	0	0	0
1130	114440	0.717	22.28	31.06	0.62	2.8	4.52	0.509	5.66	11.12	0.897	13.83	15.42	0.349	0.39	1.12	1.1523	45.8344	2	2	2	0	0	0	0	0	0	0	0	0	0	0	0	0	0	0	0	0	0	0	0	0	0	0	0	0	0	0	0
1131	114444	1.024	50.74	49.55	0.786	4.77	6.08	0.845	11.57	13.69	1.155	34.4	29.78	0.453	0.52	1.15	1.1458	44.1568	2	1	2	0	1	0	0	0	0	0	0	0	0	0	0	22	1	0	0	0	0	0	0	0	0	0	0	0	0	0	0
1132	114445	0.911	29.27	32.11	0.718	3.51	4.88	0.718	7.65	10.66	1.092	18.11	16.58	0.495	0.57	1.16	1.1429	47.0993	2	2	2	0	0	0	0	0	0	0	0	0	0	0	0	0	0	0	0	0	0	0	0	0	0	0	0	0	0	0	0
1133	114456	0.918	32.53	35.45	0.737	4.02	5.45	0.717	8.43	11.75	1.1	20.08	18.25	0.543	0.63	1.16	1.1298	52.2629	2	2	2	0	0	0	0	0	0	0	0	0	0	0	0	0	0	0	0	0	0	0	0	0	0	0	0	0	0	0	0
1134	114461	0.881	32.14	36.49	0.729	3.25	4.46	0.651	7.66	11.78	1.048	21.22	20.25	0.493	0.55	1.12	1.1504	44.3254	2	2	2	0	0	0	0	0	0	0	0	0	0	0	0	0	0	0	0	0	0	0	0	0	0	0	0	0	0	0	0
1135	114467	0.883	39.55	44.78	0.718	4.09	5.7	0.639	8.44	13.2	1.044	27.03	25.88	0.49	0.55	1.11	1.1335	52.1403	2	2	2	0	0	0	0	0	0	0	0	0	0	0	0	0	0	0	0	0	0	0	0	0	0	0	0	0	0	0	0
1136	114473	0.774	30.93	39.97	0.629	3.56	5.66	0.521	6.72	12.89	0.964	20.65	21.42	0.451	0.52	1.16	1.1421	52.5744	2	1	2	0	1	0	0	0	0	0	0	0	0	0	0	24	1	0	0	0	0	0	0	0	0	0	0	0	0	0	0
1137	114475	0.931	42.43	45.59	0.809	3.93	4.85	0.733	11.34	15.48	1.075	27.16	25.26	0.536	0.61	1.14	1.1348	47.9823	2	2	2	0	0	0	0	0	0	0	0	0	0	0	0	0	0	0	0	0	0	0	0	0	0	0	0	0	0	0	0
1138	114481	1.252	56.39	45.05	0.981	5.49	5.6	0.847	11.96	14.11	1.537	38.94	25.34	0.897	0.93	1.04	1.1329	46.1814	2	2	2	0	0	0	0	0	0	0	0	0	0	0	0	0	0	0	0	0	0	0	0	0	0	0	0	0	0	0	0
1139	114482	0.781	24.98	31.97	0.676	3.4	5.03	0.595	5.79	9.72	0.917	15.79	17.22	0.492	0.51	1.04	1.1385	51.267	2	2	1	0	0	1	0	0	0	0	0	0	0	0	0	0	0	0	0	0	0	0	0	0	0	0	0	0	0	0	0
1140	114487	0.92	39.63	43.08	0.676	3.9	5.77	0.594	7.85	13.23	1.158	27.88	24.08	0.39	0.45	1.16	1.1348	46.7292	2	2	2	0	0	0	0	0	0	0	0	0	0	0	0	0	0	0	0	0	0	0	0	0	0	0	0	0	0	0	0
1141	114490	0.93	33.84	36.39	0.816	3.69	4.52	0.649	7.3	11.24	1.108	22.85	20.63	0.755	0.98	1.3	1.1405	48.5925	2	2	2	0	0	0	0	0	0	0	0	0	0	0	0	0	0	0	0	0	0	0	0	0	0	0	0	0	0	0	0
1142	114491	0.922	40.97	44.42	0.763	4.44	5.82	0.69	8.99	13.03	1.077	27.54	25.57	0.527	0.62	1.17	1.1459	43.3886	2	2	2	0	0	0	0	0	0	0	0	0	0	0	0	0	0	0	0	0	0	0	0	0	0	0	0	0	0	0	0
1143	114497	1.238	51.36	41.48	1.059	5.98	5.65	0.992	13.48	13.6	1.434	31.9	22.24	0.927	1.21	1.31	1.1302	48.6515	2	2	2	0	0	0	0	0	0	0	0	0	0	0	0	0	0	0	0	0	0	0	0	0	0	0	0	0	0	0	0
1144	114499	0.849	29.26	34.47	0.676	3.24	4.78	0.533	5.65	10.59	1.068	20.38	19.09	0.53	0.61	1.16	1.1397	50.4231	2	2	2	0	0	0	0	0	0	0	0	0	0	0	0	0	0	0	0	0	0	0	0	0	0	0	0	0	0	0	0
1145	114500	0.778	35.78	45.98	0.642	3.69	5.75	0.614	8.12	13.24	0.888	23.96	27	0.54	0.7	1.3	1.14	49.223	2	2	2	0	0	0	0	0	0	0	0	0	0	0	0	0	0	0	0	0	0	0	0	0	0	0	0	0	0	0	0
1146	114504	1.054	43.86	41.61	0.813	4.44	5.47	0.825	9.8	11.88	1.221	29.62	24.26	0.514	0.58	1.12	1.1446	51.0179	2	2	2	0	0	0	0	0	0	0	0	0	0	0	0	0	0	0	0	0	0	0	0	0	0	0	0	0	0	0	0
1147	114519	0.688	26.93	39.11	0.627	3.06	4.88	0.512	6.57	12.83	0.808	17.3	21.41	0.432	0.57	1.32	1.1551	45.2437	2	2	2	0	0	0	0	0	0	0	0	0	0	0	0	0	0	0	0	0	0	0	0	0	0	0	0	0	0	0	0
1148	114527	0.758	23.48	30.99	0.648	2.93	4.52	0.57	5.9	10.35	0.909	14.65	16.12	0.374	0.44	1.17	1.1429	50.512	2	2	2	0	0	0	0	0	0	0	0	0	0	0	0	0	0	0	0	0	0	0	0	0	0	0	0	0	0	0	0
1149	114529	0.923	29.8	32.3	0.742	3.81	5.13	0.689	6.77	9.82	1.109	19.23	17.34	0.529	0.55	1.04	1.136	51.072	2	2	2	0	0	0	0	0	0	0	0	0	0	0	0	0	0	0	0	0	0	0	0	0	0	0	0	0	0	0	0
1150	114530	0.788	23.61	29.95	0.669	3.39	5.06	0.544	5.67	10.43	1.007	14.55	14.46	0.58	0.6	1.03	1.1445	51.9145	2	2	1	0	0	1	0	0	0	0	0	0	0	0	0	0	0	0	0	0	0	0	0	0	0	0	0	0	0	0	0
1151	114532	0.901	30.45	33.81	0.826	3.76	4.55	0.71	8.65	12.18	1.056	18.05	17.09	0.924	1.2	1.3	1.134	49.736	2	2	2	0	0	0	0	0	0	0	0	0	0	0	0	0	0	0	0	0	0	0	0	0	0	0	0	0	0	0	0
1152	114534	1.1	67.74	61.57	0.991	6.46	6.52	0.708	14.18	20.05	1.345	47.1	35.01	0.6	0.63	1.05	1.1472	40.3703	2	2	2	0	0	0	0	0	0	0	0	0	0	0	0	0	0	0	0	0	0	0	0	0	0	0	0	0	0	0	0
1153	114539	0.822	25.37	30.86	0.755	3.44	4.55	0.594	5.88	9.9	0.978	16.06	16.41	0.477	0.54	1.14	1.1383	48.6915	2	2	2	0	0	0	0	0	0	0	0	0	0	0	0	0	0	0	0	0	0	0	0	0	0	0	0	0	0	0	0
1154	114540	0.91	32.12	35.29	0.706	3.5	4.96	0.66	8	12.13	1.133	20.62	18.2	0.473	0.53	1.12	1.1375	51.6438	2	2	2	0	0	0	0	0	0	0	0	0	0	0	0	0	0	0	0	0	0	0	0	0	0	0	0	0	0	0	0
1155	114547	1.063	48.34	45.47	0.858	5.19	6.05	0.861	12.31	14.3	1.228	30.84	25.12	0.717	0.93	1.3	1.1324	48.8165	2	2	2	0	0	0	0	0	0	0	0	0	0	0	0	0	0	0	0	0	0	0	0	0	0	0	0	0	0	0	0
1156	114579	1.112	46.56	41.86	0.92	4.63	5.04	0.876	13.52	15.44	1.329	28.41	21.38	0.659	0.76	1.15	1.1392	49.331	2	2	2	0	0	0	0	0	0	0	0	0	0	0	0	0	0	0	0	0	0	0	0	0	0	0	0	0	0	0	0
1157	114585	0.821	27.36	33.32	0.68	3.07	4.52	0.577	5.44	9.44	0.974	18.85	19.36	0.562	0.73	1.3	1.1339	49.5726	2	2	2	0	0	0	0	0	0	0	0	0	0	0	0	0	0	0	0	0	0	0	0	0	0	0	0	0	0	0	0
1158	114586	0.826	28.92	35.02	0.707	3.68	5.21	0.621	6	9.66	0.955	19.23	20.15	0.495	0.58	1.17	1.1438	43.0171	2	1	2	0	1	0	0	0	0	0	0	0	0	0	0	12	1	0	0	0	0	0	0	0	0	0	0	0	0	0	0
1159	114589	0.987	49.4	50.04	0.785	4.58	5.84	0.736	11.02	14.98	1.157	33.8	29.23	0.57	0.67	1.17	1.136	49.774	2	2	2	0	0	0	0	0	0	0	0	0	0	0	0	0	0	0	0	0	0	0	0	0	0	0	0	0	0	0	0
1160	114591	1.062	34.6	32.58	0.896	4.17	4.65	0.793	8.3	10.47	1.268	22.13	17.46	0.779	0.9	1.15	1.1468	44.1882	2	2	2	0	0	0	0	0	0	0	0	0	0	0	0	0	0	0	0	0	0	0	0	0	0	0	0	0	0	0	0
1161	114596	1.008	35.43	35.14	0.74	3.61	4.88	0.824	9.98	12.1	1.203	21.84	18.15	0.419	0.43	1.04	1.1386	48.2728	2	2	2	0	0	0	0	0	0	0	0	0	0	0	0	0	0	0	0	0	0	0	0	0	0	0	0	0	0	0	0
1162	114611	0.759	24.67	32.5	0.636	3.15	4.95	0.504	5.15	10.22	0.945	16.37	17.32	0.49	0.65	1.32	1.1445	44.0192	2	1	2	0	1	0	0	0	0	0	0	0	0	0	0	40	1	0	0	0	0	0	0	0	0	0	0	0	0	0	0
1163	114616	1.046	49.55	47.4	0.81	5.15	6.36	0.79	12.7	16.07	1.27	31.71	24.96	0.626	0.72	1.16	1.153	44.2909	2	2	2	0	0	0	0	0	0	0	0	0	0	0	0	0	0	0	0	0	0	0	0	0	0	0	0	0	0	0	0
1164	114620	1.288	45.01	34.95	1.119	5.75	5.14	0.953	10.23	10.73	1.522	29.04	19.08	1.013	1.18	1.16	1.1348	50.6157	2	2	2	0	0	0	0	0	0	0	0	0	0	0	0	0	0	0	0	0	0	0	0	0	0	0	0	0	0	0	0
1165	114622	0.892	35.24	39.49	0.761	4.36	5.73	0.751	8.62	11.47	0.999	22.27	22.29	0.628	0.65	1.04	1.1403	50.1987	2	2	2	0	0	0	0	0	0	0	0	0	0	0	0	0	0	0	0	0	0	0	0	0	0	0	0	0	0	0	0
1166	114626	1.055	35.7	33.86	1.061	5.06	4.77	0.797	9.76	12.24	1.24	20.88	16.85	0.92	1.19	1.3	1.139	49.1008	2	2	1	0	0	1	0	0	0	0	0	0	0	0	0	0	0	0	0	0	0	0	0	0	0	0	0	0	0	0	0
1167	114636	1.16	45.95	39.61	1.074	5.58	5.2	0.87	11.5	13.21	1.362	28.88	21.21	0.873	0.9	1.04	1.132	43.9	2	2	2	0	0	0	0	0	0	0	0	0	0	0	0	0	0	0	0	0	0	0	0	0	0	0	0	0	0	0	0
1168	114643	1.047	38.33	36.61	0.858	4.56	5.31	0.807	9.64	11.95	1.248	24.14	19.35	0.722	0.8	1.1	1.1371	51.875	2	2	2	0	0	0	0	0	0	0	0	0	0	0	0	0	0	0	0	0	0	0	0	0	0	0	0	0	0	0	0
1169	114650	1.127	56.07	49.76	0.833	5.37	6.45	0.839	13.99	16.67	1.378	36.7	26.63	0.663	0.78	1.17	1.1491	43.1466	2	2	2	0	0	0	0	0	0	0	0	0	0	0	0	0	0	0	0	0	0	0	0	0	0	0	0	0	0	0	0
1170	114653	0.98	45.94	46.88	1.02	5.23	5.13	0.695	9.26	13.33	1.106	31.45	28.43	0.795	1.03	1.3	1.1378	47.6695	2	2	2	0	0	0	0	0	0	0	0	0	0	0	0	0	0	0	0	0	0	0	0	0	0	0	0	0	0	0	0
1171	114661	1.257	66.67	53.03	1.085	6.19	5.71	0.981	17.37	17.7	1.456	43.11	29.62	0.849	1.04	1.22	1.1403	53.146	2	2	2	0	0	0	0	0	0	0	0	0	0	0	0	0	0	0	0	0	0	0	0	0	0	0	0	0	0	0	0
1172	114663	0.904	38.91	43.05	0.754	4.34	5.76	0.576	8.81	15.31	1.172	25.75	21.98	0.437	0.45	1.04	1.1351	47.1612	2	2	2	0	0	0	0	0	0	0	0	0	0	0	0	0	0	0	0	0	0	0	0	0	0	0	0	0	0	0	0
1173	114664	1.055	40.6	38.5	0.875	4.83	5.52	0.837	10.31	12.32	1.232	25.46	20.66	0.665	0.78	1.17	1.1458	44.0543	2	2	2	0	0	0	0	0	0	0	0	0	0	0	0	0	0	0	0	0	0	0	0	0	0	0	0	0	0	0	0
1174	114676	0.866	32.2	37.17	0.612	3.66	5.98	0.627	7.73	12.32	1.103	20.81	18.86	0.361	0.42	1.18	1.1544	46.4557	2	2	2	0	0	0	0	0	0	0	0	0	0	0	0	0	0	0	0	0	0	0	0	0	0	0	0	0	0	0	0
1175	114680	0.96	45.3	47.16	0.77	4.51	5.86	0.723	10.84	14.99	1.138	29.95	26.31	0.494	0.54	1.1	1.1368	49.7227	2	2	2	0	0	0	0	0	0	0	0	0	0	0	0	0	0	0	0	0	0	0	0	0	0	0	0	0	0	0	0
1176	114682	1.213	37.44	30.87	1.033	4.82	4.66	0.956	9.32	9.74	1.416	23.31	16.46	0.885	1	1.13	1.1366	50.1191	2	2	2	0	0	0	0	0	0	0	0	0	0	0	0	0	0	0	0	0	0	0	0	0	0	0	0	0	0	0	0
1177	114686	0.916	29.15	31.8	0.763	3.2	4.19	0.713	8.34	11.7	1.107	17.6	15.91	0.55	0.61	1.1	1.1302	50.9299	2	2	2	0	0	0	0	0	0	0	0	0	0	0	0	0	0	0	0	0	0	0	0	0	0	0	0	0	0	0	0
1178	114687	0.741	24.44	32.99	0.604	3.02	4.99	0.572	5.89	10.29	0.878	15.53	17.7	0.411	0.5	1.21	1.1535	45.6109	2	2	2	0	0	0	0	0	0	0	0	0	0	0	0	0	0	0	0	0	0	0	0	0	0	0	0	0	0	0	0
1179	114698	1.173	53.9	45.95	0.987	3.84	3.89	0.872	12.24	14.04	1.35	37.83	28.02	0.648	0.76	1.17	1.1354	49.7827	2	2	2	0	0	0	0	0	0	0	0	0	0	0	0	0	0	0	0	0	0	0	0	0	0	0	0	0	0	0	0
1180	114699	0.909	40.25	44.29	0.695	4.02	5.79	0.67	10.13	15.1	1.116	26.1	23.4	0.483	0.57	1.17	1.1534	46.0735	2	2	2	0	0	0	0	0	0	0	0	0	0	0	0	0	0	0	0	0	0	0	0	0	0	0	0	0	0	0	0
1181	114700	1.124	43.78	38.97	0.999	4.94	4.94	0.8	11.63	14.54	1.397	27.22	19.48	0.719	0.86	1.2	1.1414	50.4708	2	2	2	0	0	0	0	0	0	0	0	0	0	0	0	0	0	0	0	0	0	0	0	0	0	0	0	0	0	0	0
1182	114703	0.897	38.39	42.82	0.754	4.43	5.88	0.621	7.37	11.88	1.061	26.58	25.06	0.43	0.48	1.12	1.1335	47.7275	2	2	2	0	0	0	0	0	0	0	0	0	0	0	0	0	0	0	0	0	0	0	0	0	0	0	0	0	0	0	0
1183	114708	1.077	51.24	47.59	0.905	5.44	6.02	0.887	11.72	13.21	1.202	34.08	28.36	0.627	0.73	1.17	1.1323	46.325	2	2	2	0	0	0	0	0	0	0	0	0	0	0	0	0	0	0	0	0	0	0	0	0	0	0	0	0	0	0	0
1184	114724	0.609	24.94	40.98	0.488	2.7	5.52	0.454	4.74	10.46	0.7	17.5	25	0.244	0.27	1.12	1.1294	48.4125	2	1	2	0	1	0	0	0	0	0	0	0	0	0	0	55	2	1	0	0	0	0	0	0	0	0	0	0	0	0	0
1185	114729	0.754	23.07	30.59	0.641	3.02	4.71	0.599	6.39	10.66	0.899	13.66	15.21	0.419	0.5	1.2	1.1391	50.0026	2	2	2	0	0	0	0	0	0	0	0	0	0	0	0	0	0	0	0	0	0	0	0	0	0	0	0	0	0	0	0
1186	114731	0.683	19.68	28.81	0.471	2.23	4.74	0.507	5.35	10.55	0.895	12.1	13.52	0.308	0.36	1.16	1.1378	56.9126	2	2	2	0	0	0	0	0	0	0	0	0	0	0	0	0	0	0	0	0	0	0	0	0	0	0	0	0	0	0	0
1187	114738	1.012	39.7	39.22	0.804	4.02	5	0.759	10.38	13.67	1.232	25.29	20.54	0.562	0.59	1.05	1.146	45.8102	2	2	2	0	0	0	0	0	0	0	0	0	0	0	0	0	0	0	0	0	0	0	0	0	0	0	0	0	0	0	0
1188	114739	1.057	37.09	35.1	0.811	4.08	5.03	0.787	8.78	11.17	1.282	24.22	18.9	0.498	0.58	1.16	1.1349	49.0925	2	1	2	0	1	0	0	0	0	0	0	0	0	0	0	23	1	0	0	0	0	0	0	0	0	0	0	0	0	0	0
1189	114744	0.643	20.71	32.22	0.574	2.58	4.5	0.52	5.79	11.14	0.744	12.34	16.57	0.394	0.52	1.32	1.1447	44.8399	2	2	2	0	0	0	0	0	0	0	0	0	0	0	0	0	0	0	0	0	0	0	0	0	0	0	0	0	0	0	0
1190	114745	0.928	42.26	45.54	0.758	4.46	5.88	0.765	11.68	15.28	1.071	26.12	24.38	0.488	0.55	1.13	1.1424	43.0373	2	2	2	0	0	0	0	0	0	0	0	0	0	0	0	0	0	0	0	0	0	0	0	0	0	0	0	0	0	0	0
1191	114757	0.792	25.29	31.94	0.573	2.38	4.16	0.618	6.49	10.51	0.95	16.41	17.28	0.461	0.48	1.04	1.1342	49.075	2	2	2	0	0	0	0	0	0	0	0	0	0	0	0	0	0	0	0	0	0	0	0	0	0	0	0	0	0	0	0
1192	114765	0.971	34.29	35.31	0.831	4.08	4.91	0.756	7.67	10.15	1.113	22.54	20.26	0.646	0.75	1.16	1.1371	50.5911	2	1	2	0	1	0	0	0	0	0	0	0	0	0	0	43	1	0	0	0	0	0	0	0	0	0	0	0	0	0	0
1193	114769	1.006	32.34	32.15	0.959	4.42	4.61	0.707	7.88	11.14	1.222	20.04	16.4	0.706	0.85	1.21	1.1375	50.0658	2	2	2	0	0	0	0	0	0	0	0	0	0	0	0	0	0	0	0	0	0	0	0	0	0	0	0	0	0	0	0
1194	114791	0.883	26.29	29.76	0.676	3.29	4.87	0.625	6.38	10.2	1.131	16.62	14.69	0.517	0.54	1.05	1.1467	46.0098	2	2	2	0	0	0	0	0	0	0	0	0	0	0	0	0	0	0	0	0	0	0	0	0	0	0	0	0	0	0	0
1195	114793	0.806	24.38	30.24	0.681	3.46	5.09	0.58	6.22	10.72	1.019	14.7	14.43	0.398	0.42	1.05	1.1485	47.7949	2	2	2	0	0	0	0	0	0	0	0	0	0	0	0	0	0	0	0	0	0	0	0	0	0	0	0	0	0	0	0
1196	114795	0.993	44.07	44.37	0.845	5.02	5.94	0.846	9.1	10.76	1.083	29.95	27.66	0.562	0.69	1.24	1.137	48.8725	2	2	2	0	0	0	0	0	0	0	0	0	0	0	0	0	0	0	0	0	0	0	0	0	0	0	0	0	0	0	0
1197	114797	0.979	44.07	45.03	0.85	4.85	5.7	0.761	11.85	15.56	1.152	27.38	23.77	0.482	0.56	1.16	1.1372	48.7477	2	2	2	0	0	0	0	0	0	0	0	0	0	0	0	0	0	0	0	0	0	0	0	0	0	0	0	0	0	0	0
1198	114798	0.79	20.3	25.69	0.685	3.46	5.06	0.578	4.79	8.29	0.976	12.05	12.35	0.488	0.51	1.05	1.152	48.8294	2	2	2	0	0	0	0	0	0	0	0	0	0	0	0	0	0	0	0	0	0	0	0	0	0	0	0	0	0	0	0
1199	114799	0.882	36.01	40.81	0.646	3.73	5.77	0.687	8.61	12.54	1.052	23.67	22.49	0.482	0.56	1.16	1.1322	50.848	2	2	2	0	0	0	0	0	0	0	0	0	0	0	0	0	0	0	0	0	0	0	0	0	0	0	0	0	0	0	0
1200	114821	0.881	28.63	32.5	0.814	3.11	3.82	0.641	5.7	8.89	1.002	19.82	19.79	0.757	0.98	1.3	1.1542	45.9646	2	2	2	0	0	0	0	0	0	0	0	0	0	0	0	0	0	0	0	0	0	0	0	0	0	0	0	0	0	0	0
1201	114822	1.145	39.96	34.89	1.001	4.8	4.79	0.951	10.11	10.63	1.287	25.05	19.47	0.724	0.84	1.17	1.1451	43.3809	2	2	2	0	0	0	0	0	0	0	0	0	0	0	0	0	0	0	0	0	0	0	0	0	0	0	0	0	0	0	0
1202	114826	0.678	24.9	36.75	0.655	3.73	5.69	0.444	4.95	11.15	0.815	16.22	19.9	0.364	0.44	1.2	1.1527	45.6324	2	2	2	0	0	0	0	0	0	0	0	0	0	0	0	0	0	0	0	0	0	0	0	0	0	0	0	0	0	0	0
1203	114828	0.776	25.97	33.46	0.595	3.13	5.25	0.526	5.33	10.14	0.97	17.52	18.07	0.37	0.39	1.04	1.1405	52.125	2	2	2	0	0	0	0	0	0	0	0	0	0	0	0	0	0	0	0	0	0	0	0	0	0	0	0	0	0	0	0
1204	114831	1.441	66.02	45.82	1.421	8.46	5.95	1.059	15	14.17	1.656	42.56	25.7	1.336	1.38	1.04	1.1279	42.1119	2	2	2	0	0	0	0	0	0	0	0	0	0	0	0	0	0	0	0	0	0	0	0	0	0	0	0	0	0	0	0
1205	114835	0.955	35.79	37.47	0.826	4.32	5.23	0.694	7.85	11.3	1.129	23.63	20.93	0.663	0.86	1.3	1.14	50.3718	2	2	2	0	0	0	0	0	0	0	0	0	0	0	0	0	0	0	0	0	0	0	0	0	0	0	0	0	0	0	0
1206	114838	1.106	42.31	38.26	0.942	4.93	5.24	0.891	11.47	12.87	1.286	25.91	20.15	0.877	0.91	1.04	1.1608	46.9035	2	2	2	0	0	0	0	0	0	0	0	0	0	0	0	0	0	0	0	0	0	0	0	0	0	0	0	0	0	0	0
1207	114842	0.761	26.42	34.7	0.641	3.63	5.66	0.524	6.2	11.85	0.964	16.59	17.2	0.419	0.49	1.17	1.15	47.3812	2	2	2	0	0	0	0	0	0	0	0	0	0	0	0	0	0	0	0	0	0	0	0	0	0	0	0	0	0	0	0
1208	114843	0.871	26.1	29.98	0.777	3.52	4.53	0.662	6.16	9.31	1.017	16.42	16.14	0.588	0.76	1.3	1.1353	45.5513	2	2	2	0	0	0	0	0	0	0	0	0	0	0	0	0	0	0	0	0	0	0	0	0	0	0	0	0	0	0	0
1209	114845	0.838	25.01	29.86	0.627	2.71	4.33	0.63	4.81	7.63	0.977	17.49	17.9	0.497	0.65	1.3	1.1355	48.2479	2	2	1	0	0	1	0	0	0	0	0	0	0	0	0	0	0	0	0	0	0	0	0	0	0	0	0	0	0	0	0
1210	114846	1.246	63.78	51.19	1.003	6	5.98	0.924	15.84	17.15	1.495	41.94	28.06	0.765	0.88	1.16	1.1355	44.9522	2	2	2	0	0	0	0	0	0	0	0	0	0	0	0	0	0	0	0	0	0	0	0	0	0	0	0	0	0	0	0
1211	114849	0.972	30.36	31.23	0.942	3.5	3.72	0.696	5.08	7.3	1.077	21.77	20.21	0.698	0.92	1.32	1.1452	42.2318	2	2	2	0	0	0	0	0	0	0	0	0	0	0	0	0	0	0	0	0	0	0	0	0	0	0	0	0	0	0	0
1212	114853	1.024	38.28	37.39	0.806	4.19	5.2	0.804	9.66	12.02	1.211	24.42	20.17	0.567	0.67	1.19	1.1535	45.044	2	1	2	0	3	0	0	0	0	0	0	0	0	0	0	4	1	0	12	1	0	18	1	0	0	0	0	0	0	0	0
1213	114859	1.027	41.15	40.08	0.85	4.45	5.24	0.84	10.06	11.97	1.165	26.64	22.88	0.576	0.66	1.15	1.1323	45.3321	2	2	2	0	0	0	0	0	0	0	0	0	0	0	0	0	0	0	0	0	0	0	0	0	0	0	0	0	0	0	0
1214	114861	0.893	26.96	30.19	0.685	3.51	5.12	0.689	6.84	9.93	1.097	16.61	15.14	0.588	0.61	1.03	1.144	51.2681	2	2	2	0	0	0	0	0	0	0	0	0	0	0	0	0	0	0	0	0	0	0	0	0	0	0	0	0	0	0	0
1215	114862	0.929	43.78	47.13	0.621	3.76	6.06	0.693	9.07	13.1	1.106	30.94	27.98	0.502	0.65	1.3	1.1525	43.7204	2	2	2	0	0	0	0	0	0	0	0	0	0	0	0	0	0	0	0	0	0	0	0	0	0	0	0	0	0	0	0
1216	114863	0.946	30.3	32.01	0.835	4.06	4.86	0.676	6.5	9.61	1.125	19.74	17.54	0.793	0.92	1.16	1.1376	48.0572	2	2	2	0	0	0	0	0	0	0	0	0	0	0	0	0	0	0	0	0	0	0	0	0	0	0	0	0	0	0	0
1217	114867	0.981	40.89	41.66	0.873	4.8	5.5	0.686	9.48	13.82	1.191	26.61	22.34	0.627	0.67	1.06	1.1317	53.5327	2	2	2	0	0	0	0	0	0	0	0	0	0	0	0	0	0	0	0	0	0	0	0	0	0	0	0	0	0	0	0
1218	114879	1.067	45.22	42.37	0.86	4.85	5.64	0.752	10.68	14.19	1.318	29.69	22.53	0.713	0.82	1.16	1.134	48.1211	2	2	2	0	0	0	0	0	0	0	0	0	0	0	0	0	0	0	0	0	0	0	0	0	0	0	0	0	0	0	0
1219	114883	0.979	31.26	31.93	0.807	3.54	4.39	0.634	6.41	10.1	1.222	21.31	17.44	0.617	0.75	1.22	1.146	46.6276	2	2	2	0	0	0	0	0	0	0	0	0	0	0	0	0	0	0	0	0	0	0	0	0	0	0	0	0	0	0	0
1220	114884	0.7	22.22	31.73	0.485	2.34	4.83	0.525	5.78	11	0.887	14.1	15.9	0.268	0.31	1.17	1.1477	45.0013	2	2	2	0	0	0	0	0	0	0	0	0	0	0	0	0	0	0	0	0	0	0	0	0	0	0	0	0	0	0	0
1221	114886	0.859	29.96	34.89	0.695	3.6	5.18	0.59	8.09	13.71	1.142	18.27	16	0.414	0.47	1.15	1.1323	50.3532	2	1	2	0	1	0	0	0	0	0	0	0	0	0	0	65	2	1	0	0	0	0	0	0	0	0	0	0	0	0	0
1222	114893	1.078	49.15	45.59	0.859	4.74	5.52	0.814	10.01	12.3	1.239	34.4	27.77	0.696	0.91	1.3	1.1258	49.9856	2	2	2	0	0	0	0	0	0	0	0	0	0	0	0	0	0	0	0	0	0	0	0	0	0	0	0	0	0	0	0
1223	114894	1.08	44.3	41.01	0.874	4.7	5.37	0.84	10.32	12.29	1.254	29.28	23.35	0.544	0.62	1.13	1.148	44.2835	2	2	2	0	0	0	0	0	0	0	0	0	0	0	0	0	0	0	0	0	0	0	0	0	0	0	0	0	0	0	0
1224	114898	1.075	43.65	40.59	0.83	4.48	5.4	0.832	11.08	13.31	1.284	28.09	21.88	0.51	0.55	1.09	1.1377	48.6028	2	2	2	0	0	0	0	0	0	0	0	0	0	0	0	0	0	0	0	0	0	0	0	0	0	0	0	0	0	0	0
1225	114901	0.757	24.66	32.57	0.619	3	4.84	0.589	6.32	10.72	0.902	15.34	17	0.423	0.52	1.24	1.1456	44.6736	2	2	2	0	0	0	0	0	0	0	0	0	0	0	0	0	0	0	0	0	0	0	0	0	0	0	0	0	0	0	0
1226	114902	0.774	22.84	29.52	0.667	3.19	4.79	0.539	5.37	9.98	0.968	14.27	14.75	0.528	0.69	1.3	1.1353	51.7738	2	1	2	0	1	0	0	0	0	0	0	0	0	0	0	63	2	1	0	0	0	0	0	0	0	0	0	0	0	0	0
1227	114903	0.807	28.57	35.4	0.635	3.28	5.16	0.643	7.49	11.66	0.958	17.8	18.59	0.372	0.41	1.11	1.144	51.6906	2	2	2	0	0	0	0	0	0	0	0	0	0	0	0	0	0	0	0	0	0	0	0	0	0	0	0	0	0	0	0
1228	114913	1.041	35.81	34.41	0.92	4.39	4.77	0.8	8.49	10.62	1.205	22.92	19.02	0.829	1.08	1.3	1.1369	49.4327	2	2	2	0	0	0	0	0	0	0	0	0	0	0	0	0	0	0	0	0	0	0	0	0	0	0	0	0	0	0	0
1229	114916	0.89	27.86	31.3	0.843	3.76	4.46	0.68	6.99	10.29	1.033	17.11	16.56	0.581	0.65	1.12	1.1444	48.744	2	1	2	0	1	0	0	0	0	0	0	0	0	0	0	45	1	0	0	0	0	0	0	0	0	0	0	0	0	0	0
1230	114917	0.999	47.92	47.98	0.887	4.67	5.26	0.751	11.95	15.91	1.168	31.3	26.81	0.828	1.08	1.3	1.1373	49.0368	2	2	2	0	0	0	0	0	0	0	0	0	0	0	0	0	0	0	0	0	0	0	0	0	0	0	0	0	0	0	0
1231	114919	1.097	36.7	33.46	0.874	4.95	5.66	0.857	9.49	11.07	1.331	22.26	16.73	0.622	0.69	1.11	1.1376	46.3679	2	2	2	0	0	0	0	0	0	0	0	0	0	0	0	0	0	0	0	0	0	0	0	0	0	0	0	0	0	0	0
1232	114922	1.16	49.96	43.07	0.893	5.21	5.84	0.929	11.94	12.86	1.346	32.81	24.37	0.686	0.77	1.12	1.1276	44.6944	2	2	2	0	0	0	0	0	0	0	0	0	0	0	0	0	0	0	0	0	0	0	0	0	0	0	0	0	0	0	0
1233	114927	1.244	39.5	31.77	0.971	4.93	5.08	0.961	9.62	10.01	1.496	24.96	16.68	0.92	0.95	1.04	1.1581	46.3546	2	2	2	0	0	0	0	0	0	0	0	0	0	0	0	0	0	0	0	0	0	0	0	0	0	0	0	0	0	0	0
1234	114934	1.061	40.85	38.52	1.041	5.66	5.43	0.8	8.77	10.97	1.195	26.42	22.11	0.795	1.03	1.3	1.1394	51.037	2	2	2	0	0	0	0	0	0	0	0	0	0	0	0	0	0	0	0	0	0	0	0	0	0	0	0	0	0	0	0
1235	114935	0.836	23.07	27.6	0.716	3.07	4.29	0.649	5.05	7.78	0.963	14.95	15.53	0.729	0.96	1.32	1.1472	45.7031	2	2	2	0	0	0	0	0	0	0	0	0	0	0	0	0	0	0	0	0	0	0	0	0	0	0	0	0	0	0	0
1236	114937	1.23	51.45	41.84	0.924	5.66	6.12	0.966	13.5	13.97	1.485	32.3	21.75	0.807	1.05	1.3	1.1323	46.6943	2	2	2	0	0	0	0	0	0	0	0	0	0	0	0	0	0	0	0	0	0	0	0	0	0	0	0	0	0	0	0
1237	114950	0.943	37.49	39.78	0.81	4.62	5.7	0.617	8.06	13.07	1.181	24.81	21.01	0.48	0.53	1.1	1.1422	43.4759	2	2	2	0	0	0	0	0	0	0	0	0	0	0	0	0	0	0	0	0	0	0	0	0	0	0	0	0	0	0	0
1238	114958	1.048	44.67	42.62	0.813	4.4	5.42	0.85	10.35	12.18	1.196	29.92	25.02	0.483	0.55	1.14	1.1529	42.4886	2	2	2	0	0	0	0	0	0	0	0	0	0	0	0	0	0	0	0	0	0	0	0	0	0	0	0	0	0	0	0
1239	114961	0.626	21.28	34.01	0.516	2.5	4.84	0.454	4.51	9.93	0.742	14.27	19.24	0.352	0.37	1.05	1.1526	48.0404	2	2	2	0	0	0	0	0	0	0	0	0	0	0	0	0	0	0	0	0	0	0	0	0	0	0	0	0	0	0	0
1240	114962	0.867	41.04	47.33	0.683	3.72	5.45	0.731	10.32	14.13	0.973	27	27.76	0.34	0.39	1.14	1.1324	48.7188	2	1	2	0	3	0	0	0	0	0	0	0	0	0	0	35	1	0	40	1	0	55	2	3	0	0	0	0	0	0	0
1241	114963	0.966	41.19	42.64	0.708	4.12	5.81	0.633	8.51	13.44	1.222	28.57	23.39	0.385	0.45	1.17	1.1506	47.0169	2	2	2	0	0	0	0	0	0	0	0	0	0	0	0	0	0	0	0	0	0	0	0	0	0	0	0	0	0	0	0
1242	114965	0.576	20.03	34.76	0.448	2.18	4.86	0.435	4.07	9.36	0.671	13.78	20.53	0.196	0.21	1.1	1.1412	50.7356	2	2	2	0	0	0	0	0	0	0	0	0	0	0	0	0	0	0	0	0	0	0	0	0	0	0	0	0	0	0	0
1243	114973	0.976	47.32	48.5	0.676	4.24	6.26	0.665	10.49	15.78	1.232	32.59	26.45	0.379	0.44	1.16	1.139	51.1849	2	2	2	0	0	0	0	0	0	0	0	0	0	0	0	0	0	0	0	0	0	0	0	0	0	0	0	0	0	0	0
1244	114980	1.084	43.1	39.77	0.875	4.69	5.37	0.875	11.86	13.56	1.274	26.55	20.84	0.688	0.78	1.14	1.1555	42.9681	2	2	2	0	0	0	0	0	0	0	0	0	0	0	0	0	0	0	0	0	0	0	0	0	0	0	0	0	0	0	0
1245	114982	0.988	37.31	37.75	0.797	4.46	5.6	0.812	9.85	12.13	1.149	23	20.02	0.476	0.56	1.18	1.1435	43.1946	2	2	2	0	0	0	0	0	0	0	0	0	0	0	0	0	0	0	0	0	0	0	0	0	0	0	0	0	0	0	0
1246	114985	0.902	42.23	46.8	0.68	4.22	6.21	0.778	11.1	14.26	1.022	26.91	26.33	0.384	0.44	1.16	1.1529	45.4602	2	2	2	0	0	0	0	0	0	0	0	0	0	0	0	0	0	0	0	0	0	0	0	0	0	0	0	0	0	0	0
1247	114988	1.1	47.31	42.99	0.883	4.73	5.36	0.764	10.34	13.54	1.338	32.24	24.1	0.662	0.74	1.12	1.1538	45.3429	2	2	2	0	0	0	0	0	0	0	0	0	0	0	0	0	0	0	0	0	0	0	0	0	0	0	0	0	0	0	0
1248	114989	1.03	58.45	56.76	0.903	5.8	6.43	0.764	11.94	15.64	1.173	40.71	34.7	0.846	1.1	1.3	1.1323	49.7642	2	2	2	0	0	0	0	0	0	0	0	0	0	0	0	0	0	0	0	0	0	0	0	0	0	0	0	0	0	0	0
1249	114995	0.9	32.2	35.79	0.707	3.52	4.98	0.642	8.17	12.71	1.134	20.51	18.1	0.492	0.58	1.18	1.1517	45.4792	2	2	2	0	0	0	0	0	0	0	0	0	0	0	0	0	0	0	0	0	0	0	0	0	0	0	0	0	0	0	0
1250	114996	0.727	21.61	29.71	0.551	2.57	4.67	0.611	4.34	7.11	0.819	14.69	17.93	0.454	0.59	1.3	1.1439	52.0264	2	2	2	0	0	0	0	0	0	0	0	0	0	0	0	0	0	0	0	0	0	0	0	0	0	0	0	0	0	0	0
1251	114998	0.986	45.43	46.08	0.796	4.25	5.35	0.711	10.09	14.19	1.171	31.08	26.54	0.586	0.76	1.3	1.1558	44.9821	2	2	2	0	0	0	0	0	0	0	0	0	0	0	0	0	0	0	0	0	0	0	0	0	0	0	0	0	0	0	0
1252	115005	1.046	38.12	36.46	0.843	4.27	5.07	0.833	9.16	11	1.211	24.69	20.39	0.572	0.67	1.17	1.1516	45.4484	2	2	2	0	0	0	0	0	0	0	0	0	0	0	0	0	0	0	0	0	0	0	0	0	0	0	0	0	0	0	0
1253	115013	1.116	45.29	40.58	1.004	5.34	5.32	0.85	10.68	12.56	1.29	29.27	22.69	0.788	0.91	1.16	1.1351	47.1617	2	1	2	0	6	0	0	0	0	0	0	0	0	0	0	28	1	0	29	1	0	29	1	0	40	1	0	56	2	2	57
1254	115015	0.875	29.57	33.8	0.598	3	5.02	0.663	8.76	13.21	1.144	17.81	15.57	0.596	0.59	0.99	1.1406	51.3119	2	2	2	0	0	0	0	0	0	0	0	0	0	0	0	0	0	0	0	0	0	0	0	0	0	0	0	0	0	0	0
1255	115018	0.639	25.84	40.42	0.482	2.64	5.48	0.467	6.77	14.5	0.804	16.43	20.44	0.299	0.35	1.16	1.153	46.6215	2	2	2	0	0	0	0	0	0	0	0	0	0	0	0	0	0	0	0	0	0	0	0	0	0	0	0	0	0	0	0
1256	115030	0.828	28.78	34.77	0.774	4.04	5.22	0.588	6.14	10.45	0.974	18.6	19.1	0.721	0.83	1.16	1.1337	49.0917	2	2	2	0	0	0	0	0	0	0	0	0	0	0	0	0	0	0	0	0	0	0	0	0	0	0	0	0	0	0	0
1257	115036	0.774	23.71	30.64	0.589	2.79	4.74	0.608	5.54	9.12	0.916	15.37	16.78	0.475	0.62	1.32	1.1458	45.3004	2	2	2	0	0	0	0	0	0	0	0	0	0	0	0	0	0	0	0	0	0	0	0	0	0	0	0	0	0	0	0
1258	115039	1.043	43.43	41.64	0.835	4.42	5.3	0.791	10.42	13.18	1.234	28.59	23.17	0.615	0.73	1.19	1.155	46.2395	2	2	2	0	0	0	0	0	0	0	0	0	0	0	0	0	0	0	0	0	0	0	0	0	0	0	0	0	0	0	0
1259	115046	1.047	37.66	35.96	0.914	4.67	5.11	0.762	8.7	11.42	1.25	24.29	19.43	0.68	0.77	1.13	1.1408	44.3838	2	2	2	0	0	0	0	0	0	0	0	0	0	0	0	0	0	0	0	0	0	0	0	0	0	0	0	0	0	0	0
1260	115047	0.768	23.55	30.65	0.658	3.01	4.58	0.581	6.5	11.2	0.944	14.04	14.88	0.455	0.52	1.15	1.1482	45.2109	2	2	2	0	0	0	0	0	0	0	0	0	0	0	0	0	0	0	0	0	0	0	0	0	0	0	0	0	0	0	0
1261	115051	1.059	46.07	43.49	0.775	4.21	5.43	0.787	9.79	12.44	1.252	32.07	25.62	0.464	0.54	1.16	1.1336	46.4607	2	2	2	0	0	0	0	0	0	0	0	0	0	0	0	0	0	0	0	0	0	0	0	0	0	0	0	0	0	0	0
1262	115056	1.073	49	45.65	1.032	5.58	5.4	0.84	11.87	14.13	1.208	31.55	26.12	0.831	0.96	1.15	1.1422	50.7193	2	2	2	0	0	0	0	0	0	0	0	0	0	0	0	0	0	0	0	0	0	0	0	0	0	0	0	0	0	0	0
1263	115058	0.825	34.32	41.59	0.717	3.58	4.99	0.557	6.85	12.3	0.983	23.88	24.3	0.382	0.44	1.15	1.1485	52.9057	2	2	2	0	0	0	0	0	0	0	0	0	0	0	0	0	0	0	0	0	0	0	0	0	0	0	0	0	0	0	0
1264	115063	1.301	55.46	42.62	1.04	6.23	5.99	1.001	12.77	12.75	1.527	36.46	23.88	1.354	1.09	0.8	1.1495	41.4146	2	2	2	0	0	0	0	0	0	0	0	0	0	0	0	0	0	0	0	0	0	0	0	0	0	0	0	0	0	0	0
1265	115066	1.047	42.66	40.75	0.82	4.8	5.85	0.854	10.83	12.67	1.216	27.03	22.22	0.503	0.58	1.15	1.1452	43.1218	2	2	2	0	0	0	0	0	0	0	0	0	0	0	0	0	0	0	0	0	0	0	0	0	0	0	0	0	0	0	0
1266	115073	0.563	16.45	29.21	0.511	2.53	4.94	0.488	4.17	8.54	0.62	9.75	15.72	0.259	0.3	1.16	1.1597	48.3909	2	2	2	0	0	0	0	0	0	0	0	0	0	0	0	0	0	0	0	0	0	0	0	0	0	0	0	0	0	0	0
1267	115074	0.863	36.07	41.77	0.776	4.2	5.41	0.593	8.17	13.78	1.049	23.69	22.58	0.624	0.76	1.21	1.1446	43.9761	2	1	2	0	1	0	0	0	0	0	0	0	0	0	0	52	2	1	0	0	0	0	0	0	0	0	0	0	0	0	0
1268	115081	0.834	32.11	38.5	0.67	3.66	5.46	0.674	8.72	12.95	0.982	19.73	20.09	0.44	0.57	1.3	1.1336	48.2544	2	1	2	0	1	0	0	0	0	0	0	0	0	0	0	55	2	2	0	0	0	0	0	0	0	0	0	0	0	0	0
1269	115082	0.897	25.73	28.69	0.696	3.11	4.47	0.706	6.31	8.93	1.067	16.32	15.29	0.487	0.56	1.16	1.1575	48.1848	2	2	2	0	0	0	0	0	0	0	0	0	0	0	0	0	0	0	0	0	0	0	0	0	0	0	0	0	0	0	0
1270	115083	0.822	29.85	36.31	0.67	3.7	5.53	0.593	7.29	12.3	1.02	18.86	18.48	0.448	0.49	1.1	1.1598	47.1729	2	2	2	0	0	0	0	0	0	0	0	0	0	0	0	0	0	0	0	0	0	0	0	0	0	0	0	0	0	0	0
1271	115085	0.923	38.16	41.33	0.598	3.57	5.97	0.676	9.24	13.68	1.169	25.35	21.69	0.264	0.28	1.08	1.1366	47.0307	2	2	2	0	0	0	0	0	0	0	0	0	0	0	0	0	0	0	0	0	0	0	0	0	0	0	0	0	0	0	0
1272	115089	0.54	15.77	29.22	0.384	1.84	4.78	0.492	4.99	10.14	0.625	8.94	14.31	0.117	0.14	1.17	1.1546	47.2191	2	2	2	0	0	0	0	0	0	0	0	0	0	0	0	0	0	0	0	0	0	0	0	0	0	0	0	0	0	0	0
1273	115090	1.005	42.11	41.9	0.745	3.92	5.27	0.818	10.46	12.78	1.163	27.73	23.85	0.51	0.58	1.14	1.148	42.2519	2	2	2	0	0	0	0	0	0	0	0	0	0	0	0	0	0	0	0	0	0	0	0	0	0	0	0	0	0	0	0
1274	115091	0.839	30.37	36.2	0.716	3.56	4.97	0.583	7.25	12.44	1.041	19.56	18.79	0.49	0.55	1.12	1.1337	52.2464	2	2	2	0	0	0	0	0	0	0	0	0	0	0	0	0	0	0	0	0	0	0	0	0	0	0	0	0	0	0	0
1275	115095	0.875	29.31	33.51	0.738	3.41	4.62	0.711	7.53	10.59	1.004	18.37	18.29	0.525	0.6	1.14	1.1504	44.7051	2	2	1	0	0	1	0	0	0	0	0	0	0	0	0	0	0	0	0	0	0	0	0	0	0	0	0	0	0	0	0
1276	115096	1.086	49.45	45.54	0.912	5.28	5.79	0.788	11.96	15.17	1.31	32.21	24.58	0.557	0.62	1.12	1.1305	46.1847	2	2	2	0	0	0	0	0	0	0	0	0	0	0	0	0	0	0	0	0	0	0	0	0	0	0	0	0	0	0	0
1277	115097	0.873	28.82	33	0.719	3.21	4.47	0.65	5.97	9.19	1.015	19.64	19.35	0.651	0.85	1.3	1.1343	51.5632	2	2	2	0	0	0	0	0	0	0	0	0	0	0	0	0	0	0	0	0	0	0	0	0	0	0	0	0	0	0	0
1278	115100	0.985	43.44	44.1	0.842	4.77	5.67	0.75	10.1	13.48	1.145	28.57	24.95	0.543	0.61	1.12	1.1552	43.5012	2	2	2	0	0	0	0	0	0	0	0	0	0	0	0	0	0	0	0	0	0	0	0	0	0	0	0	0	0	0	0
1279	115101	1.092	50.97	46.67	0.913	5.33	5.84	0.789	12.4	15.72	1.324	33.23	25.1	0.658	0.74	1.13	1.1527	46.9291	2	2	2	0	0	0	0	0	0	0	0	0	0	0	0	0	0	0	0	0	0	0	0	0	0	0	0	0	0	0	0
1280	115104	0.944	31.03	32.87	0.528	2.51	4.75	0.711	7.73	10.86	1.205	20.79	17.26	0.266	0.31	1.16	1.1588	43.7016	2	1	2	0	1	0	0	0	0	0	0	0	0	0	0	70	2	1	0	0	0	0	0	0	0	0	0	0	0	0	0
1281	115109	1.075	54.31	50.54	1.016	5.78	5.69	0.876	13.65	15.58	1.192	34.88	29.27	0.707	0.83	1.17	1.1511	45.198	2	2	2	0	0	0	0	0	0	0	0	0	0	0	0	0	0	0	0	0	0	0	0	0	0	0	0	0	0	0	0
1282	115126	0.896	39.33	43.92	0.835	4.89	5.86	0.622	9.51	15.3	1.095	24.93	22.77	0.667	0.86	1.3	1.139	47.9581	2	2	1	0	0	1	0	0	0	0	0	0	0	0	0	0	0	0	0	0	0	0	0	0	0	0	0	0	0	0	0
1283	115133	1.031	30.85	29.93	0.869	3.96	4.56	0.737	7.5	10.17	1.276	19.39	15.2	0.731	0.95	1.3	1.14	47.3645	2	2	2	0	0	0	0	0	0	0	0	0	0	0	0	0	0	0	0	0	0	0	0	0	0	0	0	0	0	0	0
1284	115142	0.881	34.95	39.65	0.71	3.82	5.39	0.62	7.9	12.73	1.079	23.23	21.53	0.457	0.51	1.12	1.1603	47.0932	2	2	2	0	0	0	0	0	0	0	0	0	0	0	0	0	0	0	0	0	0	0	0	0	0	0	0	0	0	0	0
1285	115144	0.917	37.6	41.02	0.74	4.32	5.84	0.66	7.86	11.91	1.092	25.42	23.27	0.526	0.61	1.15	1.1382	53.523	2	2	2	0	0	0	0	0	0	0	0	0	0	0	0	0	0	0	0	0	0	0	0	0	0	0	0	0	0	0	0
1286	115146	0.879	46.25	52.61	0.615	4.01	6.53	0.627	10.47	16.72	1.082	31.77	29.37	0.336	0.39	1.17	1.135	49.7572	2	2	2	0	0	0	0	0	0	0	0	0	0	0	0	0	0	0	0	0	0	0	0	0	0	0	0	0	0	0	0
1287	115147	0.56	17.27	30.86	0.449	2.38	5.3	0.5	2.95	5.9	0.607	11.94	19.66	0.283	0.37	1.3	1.1385	50.1304	2	2	2	0	0	0	0	0	0	0	0	0	0	0	0	0	0	0	0	0	0	0	0	0	0	0	0	0	0	0	0
1288	115150	0.771	30.59	39.66	0.603	3.21	5.32	0.602	7.82	12.99	0.917	19.57	21.35	0.381	0.44	1.17	1.1563	46.722	2	2	2	0	0	0	0	0	0	0	0	0	0	0	0	0	0	0	0	0	0	0	0	0	0	0	0	0	0	0	0
1289	115154	0.874	29.54	33.81	0.648	3.09	4.77	0.657	6.82	10.39	1.052	19.62	18.64	0.339	0.41	1.2	1.1553	46.9325	2	2	2	0	0	0	0	0	0	0	0	0	0	0	0	0	0	0	0	0	0	0	0	0	0	0	0	0	0	0	0
1290	115156	1.05	37.84	36.05	0.838	4.35	5.19	0.771	8.74	11.34	1.268	24.76	19.53	0.59	0.67	1.14	1.1544	45.1277	2	2	2	0	0	0	0	0	0	0	0	0	0	0	0	0	0	0	0	0	0	0	0	0	0	0	0	0	0	0	0
1291	115159	0.858	41.24	48.07	0.715	3.67	5.14	0.657	9.6	14.61	0.988	27.97	28.32	0.416	0.47	1.14	1.155	45.8563	2	2	2	0	0	0	0	0	0	0	0	0	0	0	0	0	0	0	0	0	0	0	0	0	0	0	0	0	0	0	0
1292	115160	0.819	35.52	43.38	0.704	4.03	5.73	0.55	6.98	12.69	0.982	24.52	24.96	0.54	0.62	1.14	1.1408	52.3518	2	2	2	0	0	0	0	0	0	0	0	0	0	0	0	0	0	0	0	0	0	0	0	0	0	0	0	0	0	0	0
1293	115161	0.872	32.23	36.95	0.711	3.64	5.13	0.697	8.71	12.5	1.028	19.88	19.33	0.546	0.62	1.14	1.1536	46.29	2	2	2	0	0	0	0	0	0	0	0	0	0	0	0	0	0	0	0	0	0	0	0	0	0	0	0	0	0	0	0
1294	115170	1.103	43.75	39.65	0.851	4.79	5.63	0.823	9.7	11.79	1.316	29.26	22.24	0.601	0.67	1.12	1.1368	46.8962	2	2	2	0	0	0	0	0	0	0	0	0	0	0	0	0	0	0	0	0	0	0	0	0	0	0	0	0	0	0	0
1295	115171	0.971	36.76	37.85	0.734	3.99	5.44	0.748	10.85	14.5	1.224	21.92	17.91	0.429	0.47	1.11	1.1542	47.2537	2	2	2	0	0	0	0	0	0	0	0	0	0	0	0	0	0	0	0	0	0	0	0	0	0	0	0	0	0	0	0
1296	115173	0.741	30	40.47	0.554	3.04	5.49	0.525	5.81	11.07	0.885	21.15	23.91	0.395	0.51	1.3	1.1382	49.6681	2	2	2	0	0	0	0	0	0	0	0	0	0	0	0	0	0	0	0	0	0	0	0	0	0	0	0	0	0	0	0
1297	115185	0.989	30.72	31.04	0.847	3.91	4.61	0.877	8.37	9.55	1.092	18.44	16.88	0.563	0.65	1.16	1.16	46.2928	2	2	2	0	0	0	0	0	0	0	0	0	0	0	0	0	0	0	0	0	0	0	0	0	0	0	0	0	0	0	0
1298	115187	0.826	31.37	37.99	0.723	3.76	5.2	0.598	6.95	11.64	0.977	20.66	21.15	0.552	0.66	1.2	1.1459	51.3249	2	2	2	0	0	0	0	0	0	0	0	0	0	0	0	0	0	0	0	0	0	0	0	0	0	0	0	0	0	0	0
1299	115189	0.849	40.9	48.17	0.684	3.3	4.83	0.694	9.81	14.15	0.952	27.79	29.19	0.48	0.55	1.14	1.1315	49.8676	2	2	2	0	0	0	0	0	0	0	0	0	0	0	0	0	0	0	0	0	0	0	0	0	0	0	0	0	0	0	0
1300	115190	1.022	44.67	43.71	0.742	4.13	5.56	0.736	9.97	13.54	1.242	30.58	24.61	0.512	0.66	1.3	1.1484	42.3577	2	2	2	0	0	0	0	0	0	0	0	0	0	0	0	0	0	0	0	0	0	0	0	0	0	0	0	0	0	0	0
1301	115192	0.972	35.11	36.14	0.762	4.29	5.63	0.705	7.97	11.31	1.19	22.84	19.19	0.444	0.52	1.17	1.1289	49.8261	2	2	2	0	0	0	0	0	0	0	0	0	0	0	0	0	0	0	0	0	0	0	0	0	0	0	0	0	0	0	0
1302	115196	0.892	31.05	34.81	0.829	3.75	4.52	0.599	6.2	10.35	1.059	21.1	19.93	0.674	0.87	1.3	1.1374	48.2867	2	2	2	0	0	0	0	0	0	0	0	0	0	0	0	0	0	0	0	0	0	0	0	0	0	0	0	0	0	0	0
1303	115201	1.059	50.05	47.25	0.882	5.5	6.23	0.836	10.3	12.32	1.194	34.25	28.7	0.456	0.53	1.16	1.14	52.8799	2	2	2	0	0	0	0	0	0	0	0	0	0	0	0	0	0	0	0	0	0	0	0	0	0	0	0	0	0	0	0
1304	115202	0.717	25.26	35.21	0.634	3.6	5.68	0.552	6.14	11.12	0.843	15.53	18.42	0.367	0.42	1.16	1.1383	51.156	2	2	2	0	0	0	0	0	0	0	0	0	0	0	0	0	0	0	0	0	0	0	0	0	0	0	0	0	0	0	0
1305	115203	1.228	44.01	35.84	0.998	5.08	5.09	0.921	10.03	10.89	1.455	28.91	19.86	0.757	0.9	1.18	1.1489	45.8592	2	2	2	0	0	0	0	0	0	0	0	0	0	0	0	0	0	0	0	0	0	0	0	0	0	0	0	0	0	0	0
1306	115206	0.84	40.11	47.73	0.7	4.27	6.1	0.585	8.48	14.51	1.009	27.36	27.12	0.392	0.44	1.13	1.1493	43.5859	1	2	2	1	0	0	33	1	0	0	0	0	0	0	0	0	0	0	0	0	0	0	0	0	0	0	0	0	0	0	0
1307	115210	1.104	49.52	44.86	0.912	5.27	5.78	0.816	12.59	15.42	1.338	31.66	23.67	0.663	0.78	1.17	1.1523	41.9965	2	2	2	0	0	0	0	0	0	0	0	0	0	0	0	0	0	0	0	0	0	0	0	0	0	0	0	0	0	0	0
1308	115212	0.818	28.47	34.81	0.644	3.15	4.89	0.713	7.17	10.07	0.914	18.15	19.85	0.355	0.41	1.16	1.1345	49.4907	2	2	2	0	0	0	0	0	0	0	0	0	0	0	0	0	0	0	0	0	0	0	0	0	0	0	0	0	0	0	0
1309	115213	0.758	25.98	34.26	0.69	3.32	4.81	0.523	5.61	10.73	0.911	17.05	18.72	0.503	0.65	1.3	1.1369	49.6116	2	2	2	0	0	0	0	0	0	0	0	0	0	0	0	0	0	0	0	0	0	0	0	0	0	0	0	0	0	0	0
1310	115215	0.736	23.49	31.93	0.658	3.11	4.73	0.541	5.57	10.3	0.876	14.81	16.91	0.412	0.47	1.14	1.1373	53.4878	2	1	2	0	1	0	0	0	0	0	0	0	0	0	0	45	1	0	0	0	0	0	0	0	0	0	0	0	0	0	0
1311	115217	1	37.58	37.58	0.809	4.34	5.36	0.763	9.79	12.84	1.21	23.45	19.39	0.663	0.7	1.05	1.1367	49.3988	2	2	2	0	0	0	0	0	0	0	0	0	0	0	0	0	0	0	0	0	0	0	0	0	0	0	0	0	0	0	0
1312	115218	1.02	47.64	46.7	1.018	5.45	5.35	0.776	11.65	15.02	1.16	30.54	26.33	0.791	0.9	1.13	1.1415	43.9988	2	2	1	0	0	1	0	0	0	0	0	0	0	0	0	0	0	0	0	0	0	0	0	0	0	0	0	0	0	0	0
1313	115225	0.629	20.7	32.91	0.496	2.68	5.41	0.437	5.11	11.7	0.817	12.91	15.8	0.302	0.35	1.17	1.137	48.8228	1	1	2	1	1	0	35	1	0	0	0	0	0	0	0	56	2	2	0	0	0	0	0	0	0	0	0	0	0	0	0
1314	115232	0.939	38.93	41.46	0.796	4.26	5.35	0.711	8.87	12.48	1.092	25.8	23.63	0.668	0.87	1.3	1.1331	48.5461	2	2	2	0	0	0	0	0	0	0	0	0	0	0	0	0	0	0	0	0	0	0	0	0	0	0	0	0	0	0	0
1315	115236	1.119	62.73	56.05	0.861	5.66	6.57	0.847	15.95	18.82	1.341	41.12	30.66	0.697	0.82	1.17	1.1437	42.979	2	2	2	0	0	0	0	0	0	0	0	0	0	0	0	0	0	0	0	0	0	0	0	0	0	0	0	0	0	0	0
1316	115242	0.95	34.41	36.24	0.891	4.39	4.93	0.689	8.21	11.91	1.125	21.81	19.39	0.636	0.71	1.12	1.125	51.4728	2	2	2	0	0	0	0	0	0	0	0	0	0	0	0	0	0	0	0	0	0	0	0	0	0	0	0	0	0	0	0
1317	115249	0.804	26.64	33.12	0.566	2.79	4.92	0.651	7.09	10.89	0.969	16.76	17.31	0.337	0.39	1.16	1.1347	48.1524	2	2	2	0	0	0	0	0	0	0	0	0	0	0	0	0	0	0	0	0	0	0	0	0	0	0	0	0	0	0	0
1318	115261	0.915	26.02	28.43	0.825	3.58	4.34	0.689	5.84	8.47	1.063	16.6	15.62	0.587	0.68	1.16	1.1403	47.8858	2	2	1	0	0	1	0	0	0	0	0	0	0	0	0	0	0	0	0	0	0	0	0	0	0	0	0	0	0	0	0
1319	115262	0.737	26.98	36.62	0.771	4.17	5.4	0.536	5.89	10.99	0.837	16.92	20.23	0.432	0.5	1.15	1.1381	49.9792	2	2	2	0	0	0	0	0	0	0	0	0	0	0	0	0	0	0	0	0	0	0	0	0	0	0	0	0	0	0	0
1320	115263	0.806	34.19	42.4	0.652	3.75	5.76	0.554	7.38	13.32	0.988	23.06	23.33	0.717	0.58	0.8	1.1597	47.7997	2	2	2	0	0	0	0	0	0	0	0	0	0	0	0	0	0	0	0	0	0	0	0	0	0	0	0	0	0	0	0
1321	115266	1.126	52.08	46.26	0.915	5.6	6.12	0.915	12.85	14.04	1.289	33.64	26.09	0.656	0.68	1.04	1.1423	51.6189	2	2	2	0	0	0	0	0	0	0	0	0	0	0	0	0	0	0	0	0	0	0	0	0	0	0	0	0	0	0	0
1322	115272	1.103	53.65	48.65	0.859	5.2	6.06	0.871	12.67	14.55	1.276	35.78	28.04	0.911	1.2	1.32	1.146	39.8635	2	2	1	0	0	1	0	0	0	0	0	0	0	0	0	0	0	0	0	0	0	0	0	0	0	0	0	0	0	0	0
1323	115277	1.268	45.42	35.82	0.938	4.61	4.91	1.007	14.06	13.96	1.579	26.75	16.94	0.818	0.94	1.15	1.1461	38.4819	2	2	2	0	0	0	0	0	0	0	0	0	0	0	0	0	0	0	0	0	0	0	0	0	0	0	0	0	0	0	0
1324	115279	1.002	40.58	40.52	0.828	4.89	5.91	0.693	8.1	11.68	1.204	27.59	22.93	0.651	0.85	1.3	1.1442	49.5077	2	2	2	0	0	0	0	0	0	0	0	0	0	0	0	0	0	0	0	0	0	0	0	0	0	0	0	0	0	0	0
1325	115281	1.085	35.38	32.6	0.964	4.35	4.52	0.843	7.94	9.42	1.237	23.08	18.67	0.889	0.92	1.04	1.1342	46.8783	2	2	2	0	0	0	0	0	0	0	0	0	0	0	0	0	0	0	0	0	0	0	0	0	0	0	0	0	0	0	0
1326	115283	1.098	38.16	34.75	0.863	4.65	5.38	0.846	8.36	9.88	1.291	25.15	19.48	0.739	0.96	1.3	1.1424	51.834	2	2	2	0	0	0	0	0	0	0	0	0	0	0	0	0	0	0	0	0	0	0	0	0	0	0	0	0	0	0	0
1327	115287	0.807	34.3	42.5	0.623	3.62	5.81	0.581	7.98	13.74	0.989	22.69	22.95	0.303	0.37	1.2	1.139	50.6973	2	2	2	0	0	0	0	0	0	0	0	0	0	0	0	0	0	0	0	0	0	0	0	0	0	0	0	0	0	0	0
1328	115288	0.815	25.26	31	0.729	3.53	4.84	0.659	6.3	9.56	0.929	15.43	16.6	0.459	0.52	1.14	1.1302	45.8935	2	2	2	0	0	0	0	0	0	0	0	0	0	0	0	0	0	0	0	0	0	0	0	0	0	0	0	0	0	0	0
1329	115290	0.923	42.27	45.79	0.846	5.02	5.93	0.698	11.06	15.84	1.09	26.2	24.03	0.534	0.59	1.1	1.1411	51.7473	2	2	2	0	0	0	0	0	0	0	0	0	0	0	0	0	0	0	0	0	0	0	0	0	0	0	0	0	0	0	0
1330	115292	1.032	42.77	41.46	0.868	4.74	5.46	0.8	9.88	12.35	1.191	28.16	23.66	0.64	0.67	1.04	1.1321	50.3558	2	2	2	0	0	0	0	0	0	0	0	0	0	0	0	0	0	0	0	0	0	0	0	0	0	0	0	0	0	0	0
1331	115304	0.794	25.95	32.69	0.668	3.68	5.52	0.604	4.49	7.43	0.901	17.78	19.75	0.454	0.47	1.04	1.1381	51.4109	2	2	2	0	0	0	0	0	0	0	0	0	0	0	0	0	0	0	0	0	0	0	0	0	0	0	0	0	0	0	0
1332	115305	1.188	32.57	27.42	1.018	4.76	4.67	0.882	8.31	9.42	1.464	19.5	13.33	0.847	0.91	1.08	1.1522	46.3992	2	2	2	0	0	0	0	0	0	0	0	0	0	0	0	0	0	0	0	0	0	0	0	0	0	0	0	0	0	0	0
1333	115309	0.904	32.2	35.62	0.785	4.16	5.3	0.671	9.04	13.48	1.128	19	16.84	0.609	0.74	1.22	1.1482	47.1887	2	2	2	0	0	0	0	0	0	0	0	0	0	0	0	0	0	0	0	0	0	0	0	0	0	0	0	0	0	0	0
1334	115310	0.839	24.32	28.98	0.71	3.17	4.47	0.626	5.52	8.82	0.996	15.63	15.69	0.499	0.58	1.16	1.1387	52.1849	2	2	2	0	0	0	0	0	0	0	0	0	0	0	0	0	0	0	0	0	0	0	0	0	0	0	0	0	0	0	0
1335	115312	0.846	39.72	46.93	0.656	3.74	5.7	0.561	7.74	13.81	1.03	28.24	27.42	0.4	0.47	1.18	1.1474	44.9501	2	2	2	0	0	0	0	0	0	0	0	0	0	0	0	0	0	0	0	0	0	0	0	0	0	0	0	0	0	0	0
1336	115313	1.049	36.41	34.7	0.956	4.95	5.17	0.809	9.76	12.08	1.244	21.7	17.45	0.73	0.81	1.11	1.1329	44.9694	2	2	2	0	0	0	0	0	0	0	0	0	0	0	0	0	0	0	0	0	0	0	0	0	0	0	0	0	0	0	0
1337	115314	1.193	37.59	31.5	0.959	4.43	4.62	0.954	10.02	10.5	1.413	23.14	16.37	0.786	0.88	1.12	1.1513	44.6771	2	2	2	0	0	0	0	0	0	0	0	0	0	0	0	0	0	0	0	0	0	0	0	0	0	0	0	0	0	0	0
1338	115328	1.124	50.44	44.86	1.026	6.06	5.91	0.795	9.59	12.07	1.294	34.78	26.88	0.833	0.96	1.16	1.131	47.1632	2	2	2	0	0	0	0	0	0	0	0	0	0	0	0	0	0	0	0	0	0	0	0	0	0	0	0	0	0	0	0
1339	115331	0.804	26.84	33.38	0.649	3.18	4.89	0.652	6.73	10.33	0.933	16.93	18.15	0.43	0.5	1.16	1.1562	46.3542	2	1	2	0	1	0	0	0	0	0	0	0	0	0	0	48	1	0	0	0	0	0	0	0	0	0	0	0	0	0	0
1340	115332	0.705	23.06	32.71	0.606	3.1	5.12	0.523	5.45	10.43	0.845	14.5	17.17	0.533	0.69	1.3	1.1409	51.25	2	2	2	0	0	0	0	0	0	0	0	0	0	0	0	0	0	0	0	0	0	0	0	0	0	0	0	0	0	0	0
1341	115334	0.917	42.65	46.51	0.742	3.79	5.11	0.624	9.95	15.94	1.135	28.91	25.47	0.343	0.38	1.12	1.1497	44.8854	2	2	2	0	0	0	0	0	0	0	0	0	0	0	0	0	0	0	0	0	0	0	0	0	0	0	0	0	0	0	0
1342	115341	0.707	21.72	30.73	0.557	2.47	4.43	0.495	5.09	10.29	0.885	14.16	16	0.441	0.57	1.3	1.1398	49.9643	2	2	2	0	0	0	0	0	0	0	0	0	0	0	0	0	0	0	0	0	0	0	0	0	0	0	0	0	0	0	0
1343	115348	1.19	44.91	37.73	1.118	5.48	4.91	0.921	10.97	11.91	1.361	28.46	20.92	0.908	0.94	1.04	1.1325	48.3821	2	2	2	0	0	0	0	0	0	0	0	0	0	0	0	0	0	0	0	0	0	0	0	0	0	0	0	0	0	0	0
1344	115351	0.772	25.31	32.8	0.604	2.96	4.9	0.61	6.48	10.63	0.919	15.87	17.27	0.432	0.56	1.3	1.1366	47.0251	2	1	2	0	1	0	0	0	0	0	0	0	0	0	0	65	2	1	0	0	0	0	0	0	0	0	0	0	0	0	0
1345	115358	0.623	23.47	37.64	0.579	3.12	5.38	0.455	5.85	12.88	0.748	14.5	19.38	0.287	0.31	1.09	1.137	52.1559	2	1	2	0	2	0	0	0	0	0	0	0	0	0	0	75	2	1	79	2	1	0	0	0	0	0	0	0	0	0	0
1346	115363	0.843	23.9	28.35	0.744	3.27	4.39	0.617	5.69	9.22	1.015	14.95	14.73	0.608	0.8	1.32	1.1501	45.5258	2	2	2	0	0	0	0	0	0	0	0	0	0	0	0	0	0	0	0	0	0	0	0	0	0	0	0	0	0	0	0
1347	115371	0.768	26.72	34.82	0.639	3.26	5.11	0.606	6.43	10.61	0.892	17.03	19.1	0.488	0.63	1.3	1.1336	49.834	2	2	2	0	0	0	0	0	0	0	0	0	0	0	0	0	0	0	0	0	0	0	0	0	0	0	0	0	0	0	0
1348	115376	1.116	49.81	44.63	0.929	5.54	5.96	0.777	10.61	13.65	1.346	33.67	25.02	0.775	0.91	1.17	1.1372	50.6399	2	2	2	0	0	0	0	0	0	0	0	0	0	0	0	0	0	0	0	0	0	0	0	0	0	0	0	0	0	0	0
1349	115383	0.963	39.76	41.3	0.825	4.89	5.92	0.759	8.33	10.99	1.088	26.54	24.39	0.589	0.68	1.16	1.1321	45.6607	2	2	2	0	0	0	0	0	0	0	0	0	0	0	0	0	0	0	0	0	0	0	0	0	0	0	0	0	0	0	0
1350	115393	0.53	19.6	36.98	0.472	2.59	5.5	0.403	4.87	12.07	0.626	12.14	19.41	0.258	0.3	1.17	1.1428	51.8579	2	2	2	0	0	0	0	0	0	0	0	0	0	0	0	0	0	0	0	0	0	0	0	0	0	0	0	0	0	0	0
1351	115396	1.139	50.84	44.64	0.831	4.77	5.74	0.838	10.65	12.71	1.353	35.42	26.18	0.683	0.79	1.16	1.1309	46.4112	2	2	1	0	0	1	0	0	0	0	0	0	0	0	0	0	0	0	0	0	0	0	0	0	0	0	0	0	0	0	0
1352	115402	0.763	24.89	32.47	0.604	3.14	5.2	0.617	6.1	9.88	0.9	15.65	17.4	0.453	0.59	1.3	1.1616	47.097	2	2	2	0	0	0	0	0	0	0	0	0	0	0	0	0	0	0	0	0	0	0	0	0	0	0	0	0	0	0	0
1353	115412	0.83	22.7	27.36	0.615	2.57	4.17	0.667	6.06	9.09	0.999	14.08	14.1	0.477	0.53	1.12	1.1581	47.059	2	2	2	0	0	0	0	0	0	0	0	0	0	0	0	0	0	0	0	0	0	0	0	0	0	0	0	0	0	0	0
1354	115416	0.781	21.63	27.71	0.67	3.07	4.59	0.522	5.3	10.15	1.022	13.26	12.97	0.517	0.68	1.32	1.151	47.5395	2	2	2	0	0	0	0	0	0	0	0	0	0	0	0	0	0	0	0	0	0	0	0	0	0	0	0	0	0	0	0
1355	115426	0.823	26.68	32.72	0.616	2.95	4.78	0.648	6.09	9.4	0.951	17.64	18.54	0.453	0.59	1.3	1.1567	47.8099	2	2	2	0	0	0	0	0	0	0	0	0	0	0	0	0	0	0	0	0	0	0	0	0	0	0	0	0	0	0	0
1356	115428	0.82	35.65	43.5	0.715	4.05	5.66	0.672	8.15	12.13	0.912	23.45	25.7	0.547	0.63	1.15	1.1459	42.8131	2	2	2	0	0	0	0	0	0	0	0	0	0	0	0	0	0	0	0	0	0	0	0	0	0	0	0	0	0	0	0
1357	115437	0.88	34.81	39.56	0.658	3.64	5.53	0.697	8.46	12.13	1.037	22.71	21.9	0.42	0.49	1.16	1.1379	47.9259	2	2	2	0	0	0	0	0	0	0	0	0	0	0	0	0	0	0	0	0	0	0	0	0	0	0	0	0	0	0	0
1358	115445	0.948	39.58	41.75	0.74	4.24	5.73	0.739	9.71	13.14	1.12	25.64	22.88	0.43	0.49	1.14	1.1338	46.7379	2	2	2	0	0	0	0	0	0	0	0	0	0	0	0	0	0	0	0	0	0	0	0	0	0	0	0	0	0	0	0
1359	115446	0.988	32.6	32.98	0.822	4.31	5.25	0.765	9.65	12.61	1.232	18.63	15.13	0.714	0.79	1.11	1.1552	46.8029	2	2	2	0	0	0	0	0	0	0	0	0	0	0	0	0	0	0	0	0	0	0	0	0	0	0	0	0	0	0	0
1360	115454	0.722	23.47	32.52	0.542	2.48	4.58	0.567	8.49	14.97	0.964	12.5	12.97	0.53	0.61	1.15	1.1528	45.8244	2	2	2	0	0	0	0	0	0	0	0	0	0	0	0	0	0	0	0	0	0	0	0	0	0	0	0	0	0	0	0
1361	115458	0.728	20.22	27.77	0.543	2.48	4.56	0.571	5.54	9.71	0.904	12.2	13.5	0.386	0.5	1.3	1.1592	48.6315	2	2	2	0	0	0	0	0	0	0	0	0	0	0	0	0	0	0	0	0	0	0	0	0	0	0	0	0	0	0	0
1362	115459	0.779	34.79	44.66	0.62	3.75	6.05	0.558	8.58	15.39	0.967	22.45	23.22	0.322	0.37	1.14	1.1313	46.6723	2	2	1	0	0	1	0	0	0	0	0	0	0	0	0	0	0	0	0	0	0	0	0	0	0	0	0	0	0	0	0
1363	115466	0.744	19.66	26.42	0.542	2.36	4.36	0.626	4.73	7.56	0.867	12.57	14.5	0.435	0.56	1.3	1.1561	47.4929	2	2	2	0	0	0	0	0	0	0	0	0	0	0	0	0	0	0	0	0	0	0	0	0	0	0	0	0	0	0	0
1364	115468	0.846	40.13	47.44	0.643	3.83	5.95	0.631	9.5	15.05	1.014	26.81	26.45	0.305	0.36	1.17	1.1277	50.3756	2	2	2	0	0	0	0	0	0	0	0	0	0	0	0	0	0	0	0	0	0	0	0	0	0	0	0	0	0	0	0
1365	115470	1.263	59.84	47.39	1.054	6.47	6.14	0.929	15.16	16.31	1.532	38.21	24.94	0.81	0.95	1.17	1.1287	49.5114	2	2	2	0	0	0	0	0	0	0	0	0	0	0	0	0	0	0	0	0	0	0	0	0	0	0	0	0	0	0	0
1366	115474	0.697	29.86	42.81	0.589	3.34	5.68	0.521	6.75	12.96	0.818	19.77	24.17	0.421	0.48	1.14	1.1397	52.4294	2	2	2	0	0	0	0	0	0	0	0	0	0	0	0	0	0	0	0	0	0	0	0	0	0	0	0	0	0	0	0
1367	115478	0.934	27.96	29.92	0.717	3.18	4.43	0.738	8.09	10.96	1.148	16.69	14.53	0.696	0.9	1.3	1.1366	47.3924	2	2	2	0	0	0	0	0	0	0	0	0	0	0	0	0	0	0	0	0	0	0	0	0	0	0	0	0	0	0	0
1368	115479	0.866	26.28	30.33	0.675	3.37	4.99	0.6	5.9	9.83	1.097	17	15.5	0.538	0.64	1.18	1.1507	46.99	2	2	2	0	0	0	0	0	0	0	0	0	0	0	0	0	0	0	0	0	0	0	0	0	0	0	0	0	0	0	0
1369	115489	1.028	38.8	37.76	0.908	5.05	5.57	0.78	9.6	12.3	1.214	24.15	19.89	0.692	0.8	1.16	1.1342	50.2114	2	2	2	0	0	0	0	0	0	0	0	0	0	0	0	0	0	0	0	0	0	0	0	0	0	0	0	0	0	0	0
1370	115490	1.214	53.04	43.69	1.007	6	5.95	0.925	13.34	14.41	1.446	33.71	23.32	0.689	0.75	1.09	1.1388	50.1462	2	2	2	0	0	0	0	0	0	0	0	0	0	0	0	0	0	0	0	0	0	0	0	0	0	0	0	0	0	0	0
1371	115494	1.193	45.16	37.84	0.935	4.95	5.3	0.902	9.81	10.88	1.403	30.4	21.67	0.589	0.68	1.16	1.1305	46.3619	2	2	2	0	0	0	0	0	0	0	0	0	0	0	0	0	0	0	0	0	0	0	0	0	0	0	0	0	0	0	0
1372	115495	0.872	27.77	31.86	0.779	3.8	4.88	0.698	7.33	10.5	1.01	16.64	16.48	0.599	0.78	1.3	1.1354	47.5272	2	2	2	0	0	0	0	0	0	0	0	0	0	0	0	0	0	0	0	0	0	0	0	0	0	0	0	0	0	0	0
1373	115498	0.85	28.44	33.48	0.697	3.48	4.99	0.586	7.05	12.02	1.088	17.92	16.46	0.547	0.72	1.32	1.1452	44.6841	2	2	2	0	0	0	0	0	0	0	0	0	0	0	0	0	0	0	0	0	0	0	0	0	0	0	0	0	0	0	0
1374	115501	0.655	24.06	36.74	0.605	3.05	5.04	0.428	5.13	11.97	0.805	15.88	19.73	0.387	0.47	1.2	1.139	54.8175	2	1	2	0	2	0	0	0	0	0	0	0	0	0	0	40	1	0	78	2	1	0	0	0	0	0	0	0	0	0	0
1375	115503	0.953	46.51	48.78	0.753	4.62	6.14	0.701	10.56	15.06	1.136	31.33	27.58	0.444	0.51	1.14	1.1339	45.0092	2	2	2	0	0	0	0	0	0	0	0	0	0	0	0	0	0	0	0	0	0	0	0	0	0	0	0	0	0	0	0
1376	115518	0.973	31.93	32.83	0.808	3.94	4.88	0.731	8.21	11.22	1.183	19.78	16.73	0.462	0.51	1.09	1.144	47.9554	2	2	2	0	0	0	0	0	0	0	0	0	0	0	0	0	0	0	0	0	0	0	0	0	0	0	0	0	0	0	0
1377	115521	0.691	23.33	33.77	0.602	3.11	5.17	0.524	5.3	10.11	0.807	14.92	18.49	0.375	0.43	1.16	1.1575	47.7219	2	2	2	0	0	0	0	0	0	0	0	0	0	0	0	0	0	0	0	0	0	0	0	0	0	0	0	0	0	0	0
1378	115524	0.982	38.88	39.61	0.917	4.86	5.3	0.705	9.13	12.95	1.165	24.88	21.35	0.755	0.86	1.14	1.1311	46.5161	2	2	2	0	0	0	0	0	0	0	0	0	0	0	0	0	0	0	0	0	0	0	0	0	0	0	0	0	0	0	0
1379	115526	1.042	47.15	45.26	0.731	4.17	5.7	0.799	11.15	13.95	1.243	31.84	25.61	0.421	0.52	1.24	1.1466	45.1314	2	2	2	0	0	0	0	0	0	0	0	0	0	0	0	0	0	0	0	0	0	0	0	0	0	0	0	0	0	0	0
1380	115531	0.842	38.6	45.82	0.626	3.65	5.83	0.574	8.49	14.79	1.05	26.47	25.21	0.765	0.98	1.28	1.1245	43.3583	2	2	2	0	0	0	0	0	0	0	0	0	0	0	0	0	0	0	0	0	0	0	0	0	0	0	0	0	0	0	0
1381	115542	0.883	42.27	47.9	0.744	4.08	5.49	0.667	9.22	13.83	1.014	28.97	28.58	0.406	0.47	1.17	1.1556	45.9553	2	2	2	0	0	0	0	0	0	0	0	0	0	0	0	0	0	0	0	0	0	0	0	0	0	0	0	0	0	0	0
1382	115547	0.568	17.31	30.49	0.45	2.06	4.58	0.428	3.83	8.94	0.673	11.42	16.97	0.381	0.5	1.32	1.1439	43.1965	2	2	2	0	0	0	0	0	0	0	0	0	0	0	0	0	0	0	0	0	0	0	0	0	0	0	0	0	0	0	0
1383	115550	0.63	20.46	32.49	0.59	2.98	5.06	0.418	3.85	9.21	0.748	13.63	18.22	0.395	0.45	1.14	1.1365	50.2638	2	2	2	0	0	0	0	0	0	0	0	0	0	0	0	0	0	0	0	0	0	0	0	0	0	0	0	0	0	0	0
1384	115554	0.678	21.86	32.23	0.572	3.07	5.36	0.56	5.46	9.75	0.778	13.33	17.13	0.421	0.47	1.12	1.1426	50.6341	2	1	2	0	2	0	0	0	0	0	0	0	0	0	0	27	1	0	32	1	0	0	0	0	0	0	0	0	0	0	0
1385	115560	0.874	35.9	41.05	0.754	4.5	5.97	0.65	9.16	14.1	1.06	22.23	20.98	0.749	0.97	1.3	1.1356	46.6175	2	2	2	0	0	0	0	0	0	0	0	0	0	0	0	0	0	0	0	0	0	0	0	0	0	0	0	0	0	0	0
1386	115566	0.885	39.1	44.18	0.731	4.25	5.81	0.636	7.65	12.02	1.032	27.2	26.35	0.416	0.5	1.2	1.157	46.7524	2	2	2	0	0	0	0	0	0	0	0	0	0	0	0	0	0	0	0	0	0	0	0	0	0	0	0	0	0	0	0
1387	115570	0.663	29.02	43.76	0.571	3.06	5.37	0.56	7.05	12.58	0.733	18.91	25.81	0.464	0.6	1.3	1.1396	50.0164	2	2	2	0	0	0	0	0	0	0	0	0	0	0	0	0	0	0	0	0	0	0	0	0	0	0	0	0	0	0	0
1388	115575	0.887	28.22	31.83	0.728	3.34	4.59	0.712	6.99	9.82	1.027	17.89	17.43	0.522	0.61	1.16	1.1452	44.4567	2	2	2	0	0	0	0	0	0	0	0	0	0	0	0	0	0	0	0	0	0	0	0	0	0	0	0	0	0	0	0
1389	115579	0.997	32.71	32.79	0.879	4.29	4.87	0.718	7.85	10.93	1.211	20.57	16.98	0.611	0.71	1.16	1.1517	44.2839	2	2	2	0	0	0	0	0	0	0	0	0	0	0	0	0	0	0	0	0	0	0	0	0	0	0	0	0	0	0	0
1390	115580	0.958	41.26	43.08	0.795	4.4	5.53	0.646	7.97	12.33	1.146	28.9	25.22	0.64	0.83	1.3	1.1374	47.1886	2	2	1	0	0	1	0	0	0	0	0	0	0	0	0	0	0	0	0	0	0	0	0	0	0	0	0	0	0	0	0
1391	115581	1.027	55.46	54.01	0.788	5.2	6.61	0.766	15.39	20.1	1.277	34.86	27.31	0.568	0.69	1.22	1.1455	44.398	2	2	2	0	0	0	0	0	0	0	0	0	0	0	0	0	0	0	0	0	0	0	0	0	0	0	0	0	0	0	0
1392	115583	1.168	42.82	36.67	1.015	5.39	5.31	0.873	10.96	12.55	1.407	26.47	18.8	0.77	0.85	1.1	1.136	46.3323	2	2	2	0	0	0	0	0	0	0	0	0	0	0	0	0	0	0	0	0	0	0	0	0	0	0	0	0	0	0	0
1393	115585	0.92	36.6	39.8	0.76	4.11	5.4	0.714	9.17	12.84	1.082	23.32	21.55	0.43	0.5	1.16	1.1347	46.497	2	2	2	0	0	0	0	0	0	0	0	0	0	0	0	0	0	0	0	0	0	0	0	0	0	0	0	0	0	0	0
1394	115587	0.601	21.22	35.33	0.5	2.61	5.21	0.482	4.93	10.23	0.688	13.68	19.88	0.354	0.46	1.3	1.1459	52.3212	2	2	2	0	0	0	0	0	0	0	0	0	0	0	0	0	0	0	0	0	0	0	0	0	0	0	0	0	0	0	0
1395	115588	1.373	60.46	44.04	1.054	6.08	5.77	1.088	15.68	14.41	1.622	38.69	23.86	0.966	1.27	1.32	1.1474	45.1373	2	2	2	0	0	0	0	0	0	0	0	0	0	0	0	0	0	0	0	0	0	0	0	0	0	0	0	0	0	0	0
1396	115591	0.755	33.71	44.67	0.585	3.69	6.3	0.555	8.13	14.64	0.923	21.9	23.73	0.378	0.39	1.04	1.1373	52.4923	2	1	2	0	1	0	0	0	0	0	0	0	0	0	0	22	1	0	0	0	0	0	0	0	0	0	0	0	0	0	0
1397	115592	1.002	46.56	46.48	0.759	4.56	6.01	0.788	11.17	14.18	1.173	30.83	26.29	0.533	0.6	1.12	1.1446	49.5519	2	2	2	0	0	0	0	0	0	0	0	0	0	0	0	0	0	0	0	0	0	0	0	0	0	0	0	0	0	0	0
1398	115595	0.884	44.54	50.36	0.656	4.08	6.23	0.697	9.05	12.98	1.008	31.41	31.16	0.34	0.4	1.17	1.1336	49.8788	2	2	2	0	0	0	0	0	0	0	0	0	0	0	0	0	0	0	0	0	0	0	0	0	0	0	0	0	0	0	0
1399	115596	0.735	23.72	32.26	0.64	2.98	4.66	0.577	5.31	9.2	0.838	15.43	18.4	0.411	0.47	1.15	1.1503	46.8537	2	2	2	0	0	0	0	0	0	0	0	0	0	0	0	0	0	0	0	0	0	0	0	0	0	0	0	0	0	0	0
1400	115600	1.212	45.5	37.54	0.847	4.55	5.36	1.027	13.22	12.87	1.437	27.73	19.3	0.54	0.62	1.16	1.1341	47.8391	2	2	2	0	0	0	0	0	0	0	0	0	0	0	0	0	0	0	0	0	0	0	0	0	0	0	0	0	0	0	0
1401	115603	0.789	29.79	37.76	0.697	3.47	4.98	0.539	6.56	12.18	0.959	19.76	20.6	0.406	0.42	1.03	1.1386	49.3021	2	2	2	0	0	0	0	0	0	0	0	0	0	0	0	0	0	0	0	0	0	0	0	0	0	0	0	0	0	0	0
1402	115606	1.112	37.3	33.54	0.976	4.49	4.6	0.868	9.31	10.72	1.291	23.5	18.21	0.688	0.8	1.16	1.1566	46.4038	2	2	2	0	0	0	0	0	0	0	0	0	0	0	0	0	0	0	0	0	0	0	0	0	0	0	0	0	0	0	0
1403	115608	0.851	32.76	38.48	0.759	3.85	5.08	0.694	8.51	12.25	0.965	20.4	21.15	0.449	0.5	1.12	1.1374	50.3608	2	2	2	0	0	0	0	0	0	0	0	0	0	0	0	0	0	0	0	0	0	0	0	0	0	0	0	0	0	0	0
1404	115611	1.034	31.41	30.38	0.907	4.15	4.57	0.749	6.71	8.97	1.22	20.55	16.84	0.771	1.01	1.3	1.1298	49.362	2	2	2	0	0	0	0	0	0	0	0	0	0	0	0	0	0	0	0	0	0	0	0	0	0	0	0	0	0	0	0
1405	115613	0.706	21.69	30.74	0.572	2.69	4.71	0.531	5.53	10.4	0.862	13.48	15.63	0.337	0.38	1.12	1.1437	53.886	2	2	2	0	0	0	0	0	0	0	0	0	0	0	0	0	0	0	0	0	0	0	0	0	0	0	0	0	0	0	0
1406	115621	0.889	26.36	29.65	0.773	3.43	4.44	0.641	5.51	8.6	1.049	17.42	16.61	0.542	0.63	1.16	1.1386	53.3062	2	2	2	0	0	0	0	0	0	0	0	0	0	0	0	0	0	0	0	0	0	0	0	0	0	0	0	0	0	0	0
1407	115629	0.908	43.35	47.77	0.69	4.01	5.82	0.685	11.65	17.01	1.11	27.68	24.95	0.484	0.58	1.21	1.1368	48.5462	2	2	2	0	0	0	0	0	0	0	0	0	0	0	0	0	0	0	0	0	0	0	0	0	0	0	0	0	0	0	0
1408	115636	1.042	45.45	43.64	0.881	4.96	5.63	0.827	10.8	13.06	1.19	29.7	24.95	0.627	0.82	1.3	1.1329	51.6422	2	2	2	0	0	0	0	0	0	0	0	0	0	0	0	0	0	0	0	0	0	0	0	0	0	0	0	0	0	0	0
1409	115639	0.915	31.14	34.03	0.842	4.08	4.85	0.71	7.35	10.36	1.047	19.71	18.82	0.618	0.8	1.3	1.1442	50.8954	2	1	2	0	1	0	0	0	0	0	0	0	0	0	0	28	1	0	0	0	0	0	0	0	0	0	0	0	0	0	0
1410	115647	0.8	26.93	33.64	0.599	2.75	4.59	0.597	6.22	10.42	0.964	17.96	18.63	0.372	0.44	1.17	1.1372	53.3908	2	2	2	0	0	0	0	0	0	0	0	0	0	0	0	0	0	0	0	0	0	0	0	0	0	0	0	0	0	0	0
1411	115656	0.953	33.91	35.58	0.803	4.03	5.02	0.702	7.39	10.52	1.123	22.49	20.04	0.456	0.53	1.16	1.1612	46.6054	2	2	2	0	0	0	0	0	0	0	0	0	0	0	0	0	0	0	0	0	0	0	0	0	0	0	0	0	0	0	0
1412	115661	1.221	60.3	49.39	0.932	5.85	6.28	1.079	17.2	15.94	1.371	37.25	27.17	0.611	0.72	1.19	1.1552	43.4184	2	2	2	0	0	0	0	0	0	0	0	0	0	0	0	0	0	0	0	0	0	0	0	0	0	0	0	0	0	0	0
1413	115662	0.932	34.72	37.27	0.79	4.31	5.46	0.734	9.74	13.28	1.115	20.67	18.53	0.51	0.59	1.16	1.1521	46.6881	2	2	2	0	0	0	0	0	0	0	0	0	0	0	0	0	0	0	0	0	0	0	0	0	0	0	0	0	0	0	0
1414	115663	1.249	46.08	36.9	0.976	5.07	5.2	1.051	11.62	11.06	1.423	29.38	20.65	0.71	0.81	1.14	1.1326	48.8655	2	2	2	0	0	0	0	0	0	0	0	0	0	0	0	0	0	0	0	0	0	0	0	0	0	0	0	0	0	0	0
1415	115666	1.204	50.7	42.12	0.98	5.06	5.16	0.959	11.85	12.36	1.374	33.79	24.6	0.832	0.93	1.12	1.1301	44.1465	2	1	2	0	1	0	0	0	0	0	0	0	0	0	0	19	1	0	0	0	0	0	0	0	0	0	0	0	0	0	0
1416	115669	0.788	22.42	28.44	0.717	3.14	4.38	0.609	4.77	7.83	0.894	14.51	16.22	0.398	0.46	1.16	1.1289	44.6003	2	1	2	0	1	0	0	0	0	0	0	0	0	0	0	56	2	1	0	0	0	0	0	0	0	0	0	0	0	0	0
1417	115670	0.816	31.91	39.11	0.61	3.26	5.34	0.633	7.92	12.52	0.975	20.73	21.25	0.32	0.36	1.13	1.1463	45.7696	2	2	2	0	0	0	0	0	0	0	0	0	0	0	0	0	0	0	0	0	0	0	0	0	0	0	0	0	0	0	0
1418	115671	1.043	40.35	38.7	0.859	4.44	5.17	0.836	10.28	12.3	1.207	25.63	21.24	0.577	0.64	1.11	1.1486	44.2778	2	1	1	0	1	1	0	0	0	0	0	0	0	0	0	66	2	9	0	0	0	0	0	0	0	0	0	0	0	0	0
1419	115674	1.238	62.04	50.11	0.865	5.56	6.42	0.999	16.18	16.2	1.466	40.31	27.49	0.63	0.73	1.15	1.1427	41.7928	2	2	2	0	0	0	0	0	0	0	0	0	0	0	0	0	0	0	0	0	0	0	0	0	0	0	0	0	0	0	0
1420	115676	0.637	23.81	37.37	0.435	2.29	5.27	0.504	5.55	11.01	0.757	15.96	21.09	0.252	0.29	1.16	1.1381	47.5337	2	2	2	0	0	0	0	0	0	0	0	0	0	0	0	0	0	0	0	0	0	0	0	0	0	0	0	0	0	0	0
1421	115679	0.914	30.72	33.63	0.738	3.65	4.95	0.704	6.9	9.8	1.068	20.17	18.88	0.469	0.54	1.16	1.1289	47.5433	2	2	2	0	0	0	0	0	0	0	0	0	0	0	0	0	0	0	0	0	0	0	0	0	0	0	0	0	0	0	0
1422	115683	0.904	26.25	29.04	0.759	3.49	4.59	0.718	6.29	8.76	1.05	16.47	15.69	0.562	0.67	1.19	1.1523	47.2255	2	2	2	0	0	0	0	0	0	0	0	0	0	0	0	0	0	0	0	0	0	0	0	0	0	0	0	0	0	0	0
1423	115692	0.641	21.56	33.63	0.554	2.58	4.65	0.548	4.9	8.94	0.702	14.08	20.05	0.46	0.6	1.3	1.1482	52.852	2	2	2	0	0	0	0	0	0	0	0	0	0	0	0	0	0	0	0	0	0	0	0	0	0	0	0	0	0	0	0
1424	115705	0.842	37.25	44.24	0.631	3.61	5.72	0.638	10.87	17.04	1.06	22.77	21.48	0.377	0.44	1.16	1.1509	44.4668	2	2	2	0	0	0	0	0	0	0	0	0	0	0	0	0	0	0	0	0	0	0	0	0	0	0	0	0	0	0	0
1425	115709	0.598	23.16	38.7	0.46	2.57	5.6	0.496	6.51	13.12	0.705	14.07	19.98	0.496	0.65	1.32	1.1496	46.9652	2	1	2	0	2	0	0	0	0	0	0	0	0	0	0	26	1	0	77	2	3	0	0	0	0	0	0	0	0	0	0
1426	115710	1.087	43.97	40.43	0.94	5.05	5.37	0.81	10.52	13	1.287	28.39	22.06	0.653	0.76	1.16	1.1338	47.3333	2	2	2	0	0	0	0	0	0	0	0	0	0	0	0	0	0	0	0	0	0	0	0	0	0	0	0	0	0	0	0
1427	115711	0.845	30.88	36.53	0.683	3.65	5.35	0.571	6.66	11.66	1.054	20.57	19.52	0.59	0.77	1.3	1.1386	48.9969	2	2	2	0	0	0	0	0	0	0	0	0	0	0	0	0	0	0	0	0	0	0	0	0	0	0	0	0	0	0	0
1428	115712	0.965	40.99	42.47	0.759	4.26	5.62	0.708	9.12	12.89	1.152	27.61	23.97	0.501	0.59	1.17	1.1531	46.4232	2	2	2	0	0	0	0	0	0	0	0	0	0	0	0	0	0	0	0	0	0	0	0	0	0	0	0	0	0	0	0
1429	115714	0.937	37.79	40.34	0.861	5.08	5.9	0.668	8.46	12.66	1.114	24.25	21.77	0.518	0.6	1.16	1.1351	48.3408	2	2	2	0	0	0	0	0	0	0	0	0	0	0	0	0	0	0	0	0	0	0	0	0	0	0	0	0	0	0	0
1430	115715	0.971	50.23	51.75	0.796	4.83	6.07	0.777	11.37	14.63	1.096	34.04	31.05	0.573	0.67	1.17	1.1417	43.4476	2	2	2	0	0	0	0	0	0	0	0	0	0	0	0	0	0	0	0	0	0	0	0	0	0	0	0	0	0	0	0
1431	115727	0.785	23.98	30.53	0.647	3.05	4.72	0.602	5	8.3	0.91	15.92	17.51	0.56	0.73	1.3	1.1571	47.2059	2	2	2	0	0	0	0	0	0	0	0	0	0	0	0	0	0	0	0	0	0	0	0	0	0	0	0	0	0	0	0
1432	115732	1.046	52.36	50.04	0.855	5.17	6.04	0.795	11.66	14.67	1.212	35.53	29.33	0.858	1.11	1.3	1.1526	42.0822	2	1	1	0	1	9999	0	0	0	0	0	0	0	0	0	61	2	3	0	0	0	0	0	0	0	0	0	0	0	0	0
1433	115736	0.848	29.13	34.35	0.707	3.33	4.71	0.676	7.31	10.82	0.982	18.49	18.83	0.553	0.58	1.04	1.1372	53.5	2	2	2	0	0	0	0	0	0	0	0	0	0	0	0	0	0	0	0	0	0	0	0	0	0	0	0	0	0	0	0
1434	115737	0.755	23.94	31.7	0.64	3.24	5.06	0.524	6.02	11.49	0.97	14.68	15.14	0.432	0.52	1.2	1.1345	47.4847	2	2	1	0	0	1	0	0	0	0	0	0	0	0	0	0	0	0	0	0	0	0	0	0	0	0	0	0	0	0	0
1435	115739	1.167	44.57	38.18	0.902	4.64	5.15	0.838	9.4	11.22	1.399	30.53	21.82	0.764	0.84	1.1	1.1367	46.2524	2	2	2	0	0	0	0	0	0	0	0	0	0	0	0	0	0	0	0	0	0	0	0	0	0	0	0	0	0	0	0
1436	115743	0.811	25.38	31.3	0.729	3.72	5.1	0.645	6.52	10.11	0.941	15.14	16.09	0.527	0.62	1.18	1.1525	44.6751	2	2	2	0	0	0	0	0	0	0	0	0	0	0	0	0	0	0	0	0	0	0	0	0	0	0	0	0	0	0	0
1437	115744	1.014	39.83	39.3	0.73	4.16	5.7	0.792	8.76	11.06	1.194	26.91	22.55	0.514	0.61	1.19	1.129	52.3163	2	1	2	0	1	0	0	0	0	0	0	0	0	0	0	27	1	0	0	0	0	0	0	0	0	0	0	0	0	0	0
1438	115746	0.967	33.57	34.73	0.786	3.96	5.04	0.817	9.44	11.55	1.112	20.17	18.14	0.556	0.64	1.15	1.1408	49.0439	2	2	2	0	0	0	0	0	0	0	0	0	0	0	0	0	0	0	0	0	0	0	0	0	0	0	0	0	0	0	0
1439	115747	0.966	39.84	41.24	0.827	4.59	5.55	0.659	9.09	13.8	1.195	26.15	21.89	0.596	0.71	1.19	1.1397	48.7442	2	1	2	0	1	0	0	0	0	0	0	0	0	0	0	36	1	0	0	0	0	0	0	0	0	0	0	0	0	0	0
1440	115749	1.048	40.22	38.38	0.846	4.09	4.84	0.819	10.15	12.4	1.228	25.97	21.14	0.566	0.67	1.18	1.1468	43.4248	2	2	2	0	0	0	0	0	0	0	0	0	0	0	0	0	0	0	0	0	0	0	0	0	0	0	0	0	0	0	0
1441	115750	1.069	39.81	37.23	0.905	4.73	5.23	0.779	8.33	10.69	1.255	26.75	21.31	0.747	0.87	1.16	1.1382	50.153	2	2	2	0	0	0	0	0	0	0	0	0	0	0	0	0	0	0	0	0	0	0	0	0	0	0	0	0	0	0	0
1442	115751	1.01	23.77	23.55	0.838	3.5	4.17	0.862	5.67	6.58	1.142	14.61	12.79	0.823	1.07	1.3	1.1352	51.6375	2	2	2	0	0	0	0	0	0	0	0	0	0	0	0	0	0	0	0	0	0	0	0	0	0	0	0	0	0	0	0
1443	115752	0.9	33.99	37.76	0.737	3.88	5.26	0.641	7.26	11.33	1.08	22.86	21.17	0.45	0.5	1.12	1.1309	51.9118	2	2	2	0	0	0	0	0	0	0	0	0	0	0	0	0	0	0	0	0	0	0	0	0	0	0	0	0	0	0	0
1444	115753	0.871	40.6	46.62	0.668	3.94	5.9	0.655	11.01	16.8	1.072	25.65	23.92	0.442	0.51	1.16	1.1312	49.0438	2	2	2	0	0	0	0	0	0	0	0	0	0	0	0	0	0	0	0	0	0	0	0	0	0	0	0	0	0	0	0
1445	115757	0.675	32.55	48.24	0.586	3.48	5.93	0.477	6.47	13.55	0.786	22.61	28.75	0.414	0.43	1.05	1.1475	44.2036	2	2	2	0	0	0	0	0	0	0	0	0	0	0	0	0	0	0	0	0	0	0	0	0	0	0	0	0	0	0	0
1446	115759	0.93	24.63	26.48	0.811	3.52	4.34	0.784	6.08	7.76	1.045	15.03	14.38	0.681	0.7	1.04	1.1533	48.0291	2	2	2	0	0	0	0	0	0	0	0	0	0	0	0	0	0	0	0	0	0	0	0	0	0	0	0	0	0	0	0
1447	115760	0.807	30.89	38.28	0.705	4.1	5.82	0.678	7.35	10.86	0.9	19.44	21.6	0.492	0.65	1.32	1.1485	45.6397	2	2	2	0	0	0	0	0	0	0	0	0	0	0	0	0	0	0	0	0	0	0	0	0	0	0	0	0	0	0	0
1448	115762	1.225	56.46	46.11	0.869	4.79	5.51	1.038	11.44	11.02	1.36	40.23	29.58	0.643	0.76	1.17	1.1501	41.875	2	2	1	0	0	1	0	0	0	0	0	0	0	0	0	0	0	0	0	0	0	0	0	0	0	0	0	0	0	0	0
1449	115778	0.832	24.84	29.85	0.629	2.89	4.6	0.658	5.85	8.89	0.984	16.09	16.35	0.461	0.54	1.17	1.1357	51.4993	2	1	2	0	1	0	0	0	0	0	0	0	0	0	0	57	2	1	0	0	0	0	0	0	0	0	0	0	0	0	0
1450	115788	0.907	35	38.57	0.842	4.03	4.79	0.689	7.28	10.56	1.02	23.69	23.22	0.761	0.98	1.29	1.1395	50.0141	2	2	2	0	0	0	0	0	0	0	0	0	0	0	0	0	0	0	0	0	0	0	0	0	0	0	0	0	0	0	0
1451	115791	1.403	56.58	40.32	1.299	6.76	5.21	0.988	12.11	12.26	1.65	37.71	22.85	1.017	1.05	1.04	1.1329	45.8988	2	2	2	0	0	0	0	0	0	0	0	0	0	0	0	0	0	0	0	0	0	0	0	0	0	0	0	0	0	0	0
1452	115804	0.712	24.8	34.83	0.554	2.4	4.34	0.587	6.33	10.79	0.815	16.06	19.7	0.341	0.39	1.13	1.1466	44.5905	2	2	2	0	0	0	0	0	0	0	0	0	0	0	0	0	0	0	0	0	0	0	0	0	0	0	0	0	0	0	0
1453	115807	1.111	49.82	44.83	0.992	6.17	6.22	0.805	11.5	14.3	1.322	32.15	24.32	0.657	0.73	1.11	1.1477	43.695	2	2	2	0	0	0	0	0	0	0	0	0	0	0	0	0	0	0	0	0	0	0	0	0	0	0	0	0	0	0	0
1454	115808	0.899	39.18	43.58	0.733	3.75	5.11	0.683	9.91	14.52	1.065	25.52	23.95	0.568	0.64	1.12	1.1394	51.477	2	2	2	0	0	0	0	0	0	0	0	0	0	0	0	0	0	0	0	0	0	0	0	0	0	0	0	0	0	0	0
1455	115809	1.119	45.24	40.43	0.857	4.4	5.14	0.838	11.01	13.14	1.347	29.83	22.15	0.588	0.66	1.12	1.1355	47.0165	2	2	2	0	0	0	0	0	0	0	0	0	0	0	0	0	0	0	0	0	0	0	0	0	0	0	0	0	0	0	0
1456	115814	0.586	21.23	36.22	0.484	2.62	5.4	0.474	6.02	12.69	0.695	12.6	18.13	0.247	0.29	1.18	1.1522	47.2972	1	2	2	1	0	0	80	2	1	0	0	0	0	0	0	0	0	0	0	0	0	0	0	0	0	0	0	0	0	0	0
1457	115815	0.913	44.03	48.24	0.826	5.24	6.35	0.672	9.73	14.48	1.06	29.06	27.42	0.441	0.49	1.12	1.1286	50.0428	2	2	2	0	0	0	0	0	0	0	0	0	0	0	0	0	0	0	0	0	0	0	0	0	0	0	0	0	0	0	0
1458	115816	0.846	30	35.48	0.701	3.64	5.19	0.631	7.32	11.6	1.019	19.04	18.68	0.467	0.55	1.17	1.1339	53.528	2	2	2	0	0	0	0	0	0	0	0	0	0	0	0	0	0	0	0	0	0	0	0	0	0	0	0	0	0	0	0
1459	115817	0.572	21.52	37.65	0.505	2.7	5.34	0.449	4.86	10.82	0.65	13.97	21.5	0.296	0.35	1.17	1.1457	55.6521	2	1	2	0	1	0	0	0	0	0	0	0	0	0	0	49	1	0	0	0	0	0	0	0	0	0	0	0	0	0	0
1460	115818	0.878	31.11	35.42	0.712	3.6	5.06	0.646	6.95	10.75	1.049	20.57	19.61	0.546	0.71	1.3	1.1407	50.5236	2	2	2	0	0	0	0	0	0	0	0	0	0	0	0	0	0	0	0	0	0	0	0	0	0	0	0	0	0	0	0
1461	115822	0.947	33.18	35.02	0.787	2.93	3.73	0.731	8.01	10.95	1.093	22.23	20.34	0.709	0.92	1.3	1.1566	45.9361	2	2	2	0	0	0	0	0	0	0	0	0	0	0	0	0	0	0	0	0	0	0	0	0	0	0	0	0	0	0	0
1462	115834	0.821	34.05	41.48	0.751	3.97	5.29	0.592	7.45	12.58	0.958	22.63	23.62	0.762	0.99	1.3	1.1257	49.7144	2	2	2	0	0	0	0	0	0	0	0	0	0	0	0	0	0	0	0	0	0	0	0	0	0	0	0	0	0	0	0
1463	115843	0.892	30.45	34.14	0.756	3.85	5.09	0.674	7.46	11.07	1.065	19.14	17.97	0.547	0.61	1.11	1.147	50.2392	2	2	2	0	0	0	0	0	0	0	0	0	0	0	0	0	0	0	0	0	0	0	0	0	0	0	0	0	0	0	0
1464	115846	0.953	28.97	30.41	0.826	3.92	4.75	0.697	6.03	8.64	1.118	19.02	17.02	0.725	0.76	1.04	1.1386	50.3587	2	2	2	0	0	0	0	0	0	0	0	0	0	0	0	0	0	0	0	0	0	0	0	0	0	0	0	0	0	0	0
1465	115848	0.983	42.54	43.26	0.75	4.43	5.9	0.7	9.43	13.48	1.201	28.68	23.88	0.625	0.82	1.32	1.141	43.5072	2	2	2	0	0	0	0	0	0	0	0	0	0	0	0	0	0	0	0	0	0	0	0	0	0	0	0	0	0	0	0
1466	115850	0.806	25.86	32.09	0.632	3	4.75	0.579	5.47	9.45	0.971	17.39	17.9	0.511	0.66	1.3	1.1366	47.7912	2	2	2	0	0	0	0	0	0	0	0	0	0	0	0	0	0	0	0	0	0	0	0	0	0	0	0	0	0	0	0
1467	115851	0.809	21.41	26.46	0.744	3.54	4.75	0.63	5.53	8.78	0.955	12.34	12.92	0.538	0.64	1.19	1.1555	46.3897	2	1	2	0	1	0	0	0	0	0	0	0	0	0	0	53	2	2	0	0	0	0	0	0	0	0	0	0	0	0	0
1468	115856	0.996	33.57	33.69	0.772	3.57	4.62	0.688	7.31	10.63	1.231	22.69	18.43	0.546	0.61	1.12	1.1351	47.8872	2	2	2	0	0	0	0	0	0	0	0	0	0	0	0	0	0	0	0	0	0	0	0	0	0	0	0	0	0	0	0
1469	115858	1.067	45.26	42.44	0.877	5.17	5.89	0.7	9.67	13.82	1.339	30.42	22.73	0.594	0.69	1.16	1.1277	43.2125	2	2	2	0	0	0	0	0	0	0	0	0	0	0	0	0	0	0	0	0	0	0	0	0	0	0	0	0	0	0	0
1470	115860	0.929	41.97	45.16	0.781	4.24	5.43	0.656	10.56	16.09	1.15	27.17	23.63	0.613	0.73	1.19	1.1498	44.9865	2	2	2	0	0	0	0	0	0	0	0	0	0	0	0	0	0	0	0	0	0	0	0	0	0	0	0	0	0	0	0
1471	115861	0.898	36.41	40.56	0.715	3.96	5.54	0.733	9.25	12.62	1.036	23.19	22.39	0.374	0.42	1.12	1.1373	47.2522	2	2	2	0	0	0	0	0	0	0	0	0	0	0	0	0	0	0	0	0	0	0	0	0	0	0	0	0	0	0	0
1472	115864	0.992	42.66	42.99	0.764	4.14	5.43	0.794	10.96	13.8	1.16	27.55	23.76	0.502	0.58	1.16	1.1337	47.1622	2	2	2	0	0	0	0	0	0	0	0	0	0	0	0	0	0	0	0	0	0	0	0	0	0	0	0	0	0	0	0
1473	115868	0.889	45.44	51.13	0.655	3.99	6.09	0.606	9.65	15.91	1.092	31.81	29.14	0.339	0.39	1.16	1.1516	43.5214	2	2	2	0	0	0	0	0	0	0	0	0	0	0	0	0	0	0	0	0	0	0	0	0	0	0	0	0	0	0	0
1474	115874	0.897	30.18	33.65	0.755	3.76	4.98	0.702	8.05	11.47	1.068	18.37	17.2	0.531	0.6	1.12	1.1364	49.194	2	2	2	0	0	0	0	0	0	0	0	0	0	0	0	0	0	0	0	0	0	0	0	0	0	0	0	0	0	0	0
1475	115882	0.66	18.52	28.08	0.494	2.29	4.65	0.519	5.91	11.39	0.857	10.32	12.04	0.425	0.44	1.04	1.1421	49.2346	2	2	2	0	0	0	0	0	0	0	0	0	0	0	0	0	0	0	0	0	0	0	0	0	0	0	0	0	0	0	0
1476	115884	0.592	19.26	32.55	0.53	2.14	4.05	0.41	4.29	10.46	0.711	12.83	18.04	0.281	0.35	1.25	1.1509	47.902	2	2	2	0	0	0	0	0	0	0	0	0	0	0	0	0	0	0	0	0	0	0	0	0	0	0	0	0	0	0	0
1477	115886	0.856	26.89	31.42	0.761	3.6	4.74	0.633	6.74	10.64	1.032	16.55	16.04	0.535	0.6	1.12	1.1522	45.6229	2	2	2	0	0	0	0	0	0	0	0	0	0	0	0	0	0	0	0	0	0	0	0	0	0	0	0	0	0	0	0
1478	115888	0.628	22.13	35.23	0.498	2.85	5.72	0.481	4.7	9.77	0.738	14.58	19.74	0.276	0.31	1.13	1.1449	45.141	2	2	2	0	0	0	0	0	0	0	0	0	0	0	0	0	0	0	0	0	0	0	0	0	0	0	0	0	0	0	0
1479	115891	0.837	27.18	32.46	0.765	4.02	5.25	0.581	5.43	9.34	0.993	17.73	17.86	0.558	0.74	1.32	1.1524	45.868	2	2	2	0	0	0	0	0	0	0	0	0	0	0	0	0	0	0	0	0	0	0	0	0	0	0	0	0	0	0	0
1480	115895	1.037	50.6	48.78	0.815	4.73	5.8	0.85	12.23	14.39	1.177	33.64	28.59	0.444	0.52	1.16	1.1352	50.9325	2	2	2	0	0	0	0	0	0	0	0	0	0	0	0	0	0	0	0	0	0	0	0	0	0	0	0	0	0	0	0
1481	115898	1.034	46.1	44.6	0.773	4.37	5.66	0.756	10.32	13.65	1.242	31.41	25.3	0.525	0.61	1.16	1.1326	47.1072	2	2	2	0	0	0	0	0	0	0	0	0	0	0	0	0	0	0	0	0	0	0	0	0	0	0	0	0	0	0	0
1482	115904	0.99	51.99	52.49	0.787	5.32	6.76	0.708	10.71	15.13	1.175	35.96	30.6	0.45	0.51	1.14	1.1356	52.8432	2	2	2	0	0	0	0	0	0	0	0	0	0	0	0	0	0	0	0	0	0	0	0	0	0	0	0	0	0	0	0
1483	115907	1.25	54.89	43.9	1.006	5.47	5.44	1.014	13.95	13.76	1.436	35.47	24.7	0.612	0.71	1.16	1.155	44.6788	2	2	2	0	0	0	0	0	0	0	0	0	0	0	0	0	0	0	0	0	0	0	0	0	0	0	0	0	0	0	0
1484	115908	1.042	36.94	35.45	0.798	4.05	5.08	0.773	8.69	11.25	1.266	24.2	19.13	0.678	0.81	1.2	1.1567	47.8319	2	2	2	0	0	0	0	0	0	0	0	0	0	0	0	0	0	0	0	0	0	0	0	0	0	0	0	0	0	0	0
1485	115909	1.117	37.95	33.98	1.054	4.99	4.73	0.846	9.02	10.66	1.288	23.94	18.58	0.707	0.78	1.1	1.1318	44.6257	2	2	2	0	0	0	0	0	0	0	0	0	0	0	0	0	0	0	0	0	0	0	0	0	0	0	0	0	0	0	0
1486	115934	0.724	23.23	32.09	0.652	2.99	4.59	0.578	6.01	10.4	0.832	14.23	17.1	0.438	0.51	1.17	1.143	51.1225	2	2	2	0	0	0	0	0	0	0	0	0	0	0	0	0	0	0	0	0	0	0	0	0	0	0	0	0	0	0	0
1487	115935	0.898	40.43	45.04	0.724	4.29	5.92	0.708	9.58	13.53	1.038	26.56	25.58	0.83	1.09	1.32	1.1433	40.6903	2	2	2	0	0	0	0	0	0	0	0	0	0	0	0	0	0	0	0	0	0	0	0	0	0	0	0	0	0	0	0
1488	115936	0.922	32.61	35.37	0.696	3.6	5.18	0.655	7.96	12.16	1.168	21.05	18.03	0.588	0.77	1.32	1.1498	46.089	2	2	1	0	0	2	0	0	0	0	0	0	0	0	0	0	0	0	0	0	0	0	0	0	0	0	0	0	0	0	0
1489	115939	1.123	45.09	40.14	1.035	6.18	5.97	0.906	13.15	14.51	1.311	25.76	19.66	0.936	0.98	1.04	1.1292	48.0189	2	2	2	0	0	0	0	0	0	0	0	0	0	0	0	0	0	0	0	0	0	0	0	0	0	0	0	0	0	0	0
1490	115947	1.174	38.81	33.07	1.029	5.11	4.97	0.941	9.62	10.23	1.347	24.08	17.87	0.797	0.84	1.05	1.1448	42.0014	2	2	2	0	0	0	0	0	0	0	0	0	0	0	0	0	0	0	0	0	0	0	0	0	0	0	0	0	0	0	0
1491	115955	1.027	30.65	29.85	0.863	4.1	4.75	0.769	7.74	10.07	1.251	18.81	15.03	0.829	1.09	1.32	1.1405	42.387	2	2	2	0	0	0	0	0	0	0	0	0	0	0	0	0	0	0	0	0	0	0	0	0	0	0	0	0	0	0	0
1492	115957	1.073	50.7	47.26	0.997	5.36	5.38	0.821	12.02	14.64	1.223	33.33	27.24	0.681	0.78	1.14	1.134	50.8642	2	2	2	0	0	0	0	0	0	0	0	0	0	0	0	0	0	0	0	0	0	0	0	0	0	0	0	0	0	0	0
1493	115961	0.953	46.32	48.62	0.769	4.63	6.03	0.725	10.71	14.77	1.114	30.98	27.81	0.744	0.97	1.31	1.1301	47.2373	2	2	2	0	0	0	0	0	0	0	0	0	0	0	0	0	0	0	0	0	0	0	0	0	0	0	0	0	0	0	0
1494	115963	0.911	43.16	47.41	0.728	4.27	5.86	0.687	8.73	12.69	1.046	30.17	28.85	0.452	0.51	1.13	1.1482	47.6468	2	2	2	0	0	0	0	0	0	0	0	0	0	0	0	0	0	0	0	0	0	0	0	0	0	0	0	0	0	0	0
1495	115968	0.669	23.82	35.6	0.502	2.48	4.93	0.494	5.71	11.56	0.818	15.63	19.11	0.216	0.24	1.12	1.1432	52.7306	2	1	2	0	1	0	0	0	0	0	0	0	0	0	0	73	2	1	0	0	0	0	0	0	0	0	0	0	0	0	0
1496	115969	0.979	28.16	28.77	0.919	3.2	3.48	0.755	6.25	8.28	1.1	18.71	17	0.721	0.95	1.32	1.1485	42.367	2	2	2	0	0	0	0	0	0	0	0	0	0	0	0	0	0	0	0	0	0	0	0	0	0	0	0	0	0	0	0
1497	115983	0.828	27.94	33.74	0.73	3.25	4.45	0.612	5.89	9.62	0.956	18.8	19.68	0.67	0.87	1.29	1.1387	50.4215	2	2	1	0	0	1	0	0	0	0	0	0	0	0	0	0	0	0	0	0	0	0	0	0	0	0	0	0	0	0	0
1498	115985	1.357	49.59	36.54	1.205	6.45	5.35	0.902	10.03	11.12	1.65	33.1	20.06	1.211	1.58	1.31	1.1398	48.4728	2	2	2	0	0	0	0	0	0	0	0	0	0	0	0	0	0	0	0	0	0	0	0	0	0	0	0	0	0	0	0
1499	115988	0.923	33.7	36.51	0.706	3.57	5.06	0.711	8.12	11.41	1.099	22.01	20.03	0.536	0.6	1.12	1.1362	51.3203	2	2	2	0	0	0	0	0	0	0	0	0	0	0	0	0	0	0	0	0	0	0	0	0	0	0	0	0	0	0	0
1500	115989	0.887	30.97	34.9	0.843	4.43	5.26	0.703	8.58	12.2	1.03	17.97	17.45	0.55	0.62	1.14	1.1601	46.4083	2	2	2	0	0	0	0	0	0	0	0	0	0	0	0	0	0	0	0	0	0	0	0	0	0	0	0	0	0	0	0
1501	115992	1.071	40.01	37.37	0.802	4.44	5.54	0.779	9.25	11.88	1.319	26.32	19.95	0.665	0.69	1.04	1.1547	46.7897	2	2	2	0	0	0	0	0	0	0	0	0	0	0	0	0	0	0	0	0	0	0	0	0	0	0	0	0	0	0	0
1502	115993	1.091	52.57	48.18	0.749	4.24	5.66	0.754	12.77	16.93	1.389	35.56	25.6	0.499	0.55	1.1	1.1324	48.0242	2	2	2	0	0	0	0	0	0	0	0	0	0	0	0	0	0	0	0	0	0	0	0	0	0	0	0	0	0	0	0
1503	115994	1.034	48.47	46.88	0.837	4.94	5.91	0.788	13.93	17.68	1.271	29.6	23.29	0.52	0.61	1.17	1.1307	49.1837	2	2	2	0	0	0	0	0	0	0	0	0	0	0	0	0	0	0	0	0	0	0	0	0	0	0	0	0	0	0	0
1504	115996	0.89	31.55	35.43	0.705	3.96	5.62	0.66	6.63	10.05	1.061	20.96	19.76	0.639	0.74	1.15	1.1363	48.0303	2	2	2	0	0	0	0	0	0	0	0	0	0	0	0	0	0	0	0	0	0	0	0	0	0	0	0	0	0	0	0
1505	116004	0.75	21.82	29.1	0.625	2.66	4.25	0.529	4.88	9.23	0.914	14.28	15.62	0.539	0.7	1.3	1.1391	54.8628	2	2	2	0	0	0	0	0	0	0	0	0	0	0	0	0	0	0	0	0	0	0	0	0	0	0	0	0	0	0	0
1506	116008	0.974	35.42	36.38	0.859	3.89	4.52	0.889	10.02	11.27	1.045	21.51	20.58	0.552	0.73	1.32	1.1426	44.5863	2	2	2	0	0	0	0	0	0	0	0	0	0	0	0	0	0	0	0	0	0	0	0	0	0	0	0	0	0	0	0
1507	116010	0.944	25.58	27.09	0.85	4.31	5.08	0.671	6.13	9.13	1.175	15.14	12.89	0.599	0.66	1.1	1.1458	45.4144	2	2	2	0	0	0	0	0	0	0	0	0	0	0	0	0	0	0	0	0	0	0	0	0	0	0	0	0	0	0	0
1508	116012	0.701	17.48	24.94	0.598	2.46	4.11	0.563	4.35	7.72	0.814	10.68	13.12	0.43	0.54	1.26	1.1606	48.9324	2	2	2	0	0	0	0	0	0	0	0	0	0	0	0	0	0	0	0	0	0	0	0	0	0	0	0	0	0	0	0
1509	116013	0.871	27.83	31.94	0.794	3.69	4.65	0.61	5.91	9.69	1.036	18.23	17.6	0.552	0.63	1.14	1.13	48.6823	2	2	2	0	0	0	0	0	0	0	0	0	0	0	0	0	0	0	0	0	0	0	0	0	0	0	0	0	0	0	0
1510	116018	0.902	39.54	43.82	0.696	4	5.75	0.65	6.96	10.71	1.044	28.57	27.36	0.52	0.59	1.13	1.1474	44.9387	2	2	2	0	0	0	0	0	0	0	0	0	0	0	0	0	0	0	0	0	0	0	0	0	0	0	0	0	0	0	0
1511	116019	1.06	35.47	33.47	0.846	3.91	4.63	0.783	8.01	10.23	1.266	23.55	18.61	0.612	0.68	1.11	1.1533	46.1642	2	2	2	0	0	0	0	0	0	0	0	0	0	0	0	0	0	0	0	0	0	0	0	0	0	0	0	0	0	0	0
1512	116021	0.883	37.42	42.38	0.749	4.45	5.94	0.628	9.1	14.5	1.088	23.87	21.94	0.59	0.61	1.03	1.1397	52.1644	2	2	2	0	0	0	0	0	0	0	0	0	0	0	0	0	0	0	0	0	0	0	0	0	0	0	0	0	0	0	0
1513	116027	0.909	39.54	43.51	0.801	4.48	5.6	0.672	8.75	13.01	1.057	26.32	24.9	0.451	0.53	1.18	1.1436	43.2118	2	2	2	0	0	0	0	0	0	0	0	0	0	0	0	0	0	0	0	0	0	0	0	0	0	0	0	0	0	0	0
1514	116030	1.269	59.92	47.21	1.147	7.16	6.24	0.916	16.01	17.48	1.565	36.75	23.49	0.864	0.94	1.09	1.1408	50.9534	2	2	2	0	0	0	0	0	0	0	0	0	0	0	0	0	0	0	0	0	0	0	0	0	0	0	0	0	0	0	0
1515	116036	1.022	32.23	31.54	0.848	3.34	3.94	0.75	7.63	10.18	1.221	21.26	17.41	0.699	0.82	1.17	1.1491	44.3984	2	1	2	0	1	0	0	0	0	0	0	0	0	0	0	9	1	0	0	0	0	0	0	0	0	0	0	0	0	0	0
1516	116041	0.908	47.49	52.29	0.829	5.07	6.11	0.563	8.47	15.04	1.09	33.95	31.14	0.47	0.55	1.16	1.1354	50.6346	2	2	2	0	0	0	0	0	0	0	0	0	0	0	0	0	0	0	0	0	0	0	0	0	0	0	0	0	0	0	0
1517	116056	0.961	32.49	33.79	0.851	4.16	4.89	0.734	7.29	9.93	1.109	21.04	18.97	0.744	0.97	1.3	1.1385	50.4235	2	2	2	0	0	0	0	0	0	0	0	0	0	0	0	0	0	0	0	0	0	0	0	0	0	0	0	0	0	0	0
1518	116057	1.026	47.47	46.26	0.91	5.38	5.91	0.729	10.93	14.99	1.229	31.16	25.36	0.686	0.77	1.12	1.1354	49.3772	2	2	2	0	0	0	0	0	0	0	0	0	0	0	0	0	0	0	0	0	0	0	0	0	0	0	0	0	0	0	0
1519	116061	1.113	51.3	46.1	0.991	5.55	5.61	0.784	11.5	14.66	1.326	34.25	25.83	0.802	0.9	1.12	1.1408	51.1528	2	2	2	0	0	0	0	0	0	0	0	0	0	0	0	0	0	0	0	0	0	0	0	0	0	0	0	0	0	0	0
1520	116065	1.128	38.02	33.71	0.998	4.64	4.65	0.858	10.13	11.81	1.347	23.25	17.26	0.697	0.73	1.04	1.1214	49.0387	2	1	2	0	1	0	0	0	0	0	0	0	0	0	0	6	1	0	0	0	0	0	0	0	0	0	0	0	0	0	0
1521	116066	0.896	42.8	47.79	0.749	4.75	6.34	0.634	10.21	16.11	1.099	27.84	25.34	0.516	0.6	1.17	1.1317	45.4766	2	2	2	0	0	0	0	0	0	0	0	0	0	0	0	0	0	0	0	0	0	0	0	0	0	0	0	0	0	0	0
1522	116070	1.042	38.03	36.49	0.804	4.28	5.32	0.804	9.71	12.07	1.259	24.05	19.1	0.462	0.53	1.16	1.1334	45.8219	2	2	2	0	0	0	0	0	0	0	0	0	0	0	0	0	0	0	0	0	0	0	0	0	0	0	0	0	0	0	0
1523	116073	1.232	45.64	37.05	1.054	5.89	5.59	0.84	9.92	11.81	1.518	29.82	19.65	0.891	1.05	1.18	1.1301	46.9752	2	2	2	0	0	0	0	0	0	0	0	0	0	0	0	0	0	0	0	0	0	0	0	0	0	0	0	0	0	0	0
1524	116077	1.052	42.43	40.35	0.868	4.62	5.32	0.761	9.42	12.39	1.254	28.39	22.64	0.757	1	1.32	1.1488	44.1191	2	2	2	0	0	0	0	0	0	0	0	0	0	0	0	0	0	0	0	0	0	0	0	0	0	0	0	0	0	0	0
1525	116084	0.815	29.58	36.28	0.745	4.34	5.83	0.523	6.82	13.05	1.058	18.41	17.4	0.48	0.5	1.05	1.1539	48.872	2	2	2	0	0	0	0	0	0	0	0	0	0	0	0	0	0	0	0	0	0	0	0	0	0	0	0	0	0	0	0
1526	116101	1.089	48.18	44.24	0.856	5.6	6.54	0.892	12.4	13.9	1.268	30.19	23.81	0.666	0.77	1.15	1.1506	43.7623	2	2	2	0	0	0	0	0	0	0	0	0	0	0	0	0	0	0	0	0	0	0	0	0	0	0	0	0	0	0	0
1527	116104	0.83	31.41	37.86	0.643	3.22	5.01	0.548	6.67	12.18	1.041	21.51	20.66	0.509	0.67	1.32	1.1472	46.644	2	2	2	0	0	0	0	0	0	0	0	0	0	0	0	0	0	0	0	0	0	0	0	0	0	0	0	0	0	0	0
1528	116109	1.285	47.39	36.87	1.121	5.73	5.12	1.034	11.02	10.66	1.453	30.63	21.09	0.856	1.01	1.17	1.1477	42.0254	2	2	2	0	0	0	0	0	0	0	0	0	0	0	0	0	0	0	0	0	0	0	0	0	0	0	0	0	0	0	0
1529	116112	0.761	27.66	36.34	0.671	3.83	5.71	0.595	6.28	10.55	0.874	17.55	20.07	0.497	0.64	1.3	1.1333	46.9464	2	2	2	0	0	0	0	0	0	0	0	0	0	0	0	0	0	0	0	0	0	0	0	0	0	0	0	0	0	0	0
1530	116118	0.751	25.32	33.7	0.63	3.05	4.84	0.554	6.68	12.05	0.927	15.59	16.82	0.594	0.77	1.3	1.1419	51.5293	2	2	1	0	0	1	0	0	0	0	0	0	0	0	0	0	0	0	0	0	0	0	0	0	0	0	0	0	0	0	0
1531	116120	0.768	23.22	30.24	0.588	2.49	4.24	0.617	5.54	8.97	0.892	15.19	17.03	0.382	0.45	1.17	1.1388	54.5562	2	2	2	0	0	0	0	0	0	0	0	0	0	0	0	0	0	0	0	0	0	0	0	0	0	0	0	0	0	0	0
1532	116125	0.938	41.37	44.09	0.74	4.57	6.18	0.692	10.07	14.56	1.144	26.74	23.36	0.452	0.53	1.16	1.1362	51.6285	2	2	2	0	0	0	0	0	0	0	0	0	0	0	0	0	0	0	0	0	0	0	0	0	0	0	0	0	0	0	0
1533	116127	1.247	51.78	41.52	1.097	6.51	5.93	0.98	14.02	14.31	1.469	31.26	21.28	0.678	0.75	1.11	1.1254	49.5562	2	2	2	0	0	0	0	0	0	0	0	0	0	0	0	0	0	0	0	0	0	0	0	0	0	0	0	0	0	0	0
1534	116129	1.123	51.96	46.25	0.954	5.39	5.65	0.863	12.17	14.1	1.298	34.4	26.5	0.722	0.85	1.17	1.1462	43.2444	2	2	2	0	0	0	0	0	0	0	0	0	0	0	0	0	0	0	0	0	0	0	0	0	0	0	0	0	0	0	0
1535	116135	1.027	42.3	41.18	0.767	3.98	5.19	0.718	8.91	12.4	1.247	29.42	23.59	0.517	0.58	1.12	1.1343	50.5833	2	2	2	0	0	0	0	0	0	0	0	0	0	0	0	0	0	0	0	0	0	0	0	0	0	0	0	0	0	0	0
1536	116138	0.835	24.29	29.08	0.664	2.82	4.24	0.686	7.12	10.38	0.992	14.35	14.46	0.491	0.57	1.17	1.1539	49.2633	2	2	2	0	0	0	0	0	0	0	0	0	0	0	0	0	0	0	0	0	0	0	0	0	0	0	0	0	0	0	0
1537	116153	0.679	20.09	29.57	0.509	2.57	5.05	0.525	4.95	9.43	0.833	12.57	15.09	0.351	0.37	1.04	1.1507	57.1936	2	2	2	0	0	0	0	0	0	0	0	0	0	0	0	0	0	0	0	0	0	0	0	0	0	0	0	0	0	0	0
1538	116157	0.986	28.76	29.16	0.822	3.65	4.44	0.785	6.93	8.83	1.145	18.18	15.89	0.693	0.9	1.31	1.1383	50.267	2	2	2	0	0	0	0	0	0	0	0	0	0	0	0	0	0	0	0	0	0	0	0	0	0	0	0	0	0	0	0
1539	116165	0.837	26.2	31.29	0.725	3.81	5.26	0.627	6.79	10.84	1.027	15.59	15.19	0.531	0.6	1.13	1.1458	43.8118	2	2	2	0	0	0	0	0	0	0	0	0	0	0	0	0	0	0	0	0	0	0	0	0	0	0	0	0	0	0	0
1540	116166	1.294	54.94	42.45	0.915	5.54	6.05	0.95	13.03	13.72	1.604	36.38	22.68	0.778	0.81	1.04	1.1368	49.236	2	2	1	0	0	1	0	0	0	0	0	0	0	0	0	0	0	0	0	0	0	0	0	0	0	0	0	0	0	0	0
1541	116167	0.936	27.69	29.59	0.734	3.79	5.16	0.662	5.95	8.99	1.163	17.95	15.43	0.574	0.6	1.04	1.1356	53.9812	2	2	2	0	0	0	0	0	0	0	0	0	0	0	0	0	0	0	0	0	0	0	0	0	0	0	0	0	0	0	0
1542	116169	0.8	25.6	31.99	0.695	3.38	4.86	0.604	6.41	10.61	0.958	15.82	16.51	0.528	0.65	1.24	1.1579	45.3186	2	2	2	0	0	0	0	0	0	0	0	0	0	0	0	0	0	0	0	0	0	0	0	0	0	0	0	0	0	0	0
1543	116174	0.905	23.17	25.6	0.856	3.46	4.04	0.622	4.54	7.31	1.065	15.17	14.25	0.669	0.78	1.16	1.1334	53.5454	2	2	2	0	0	0	0	0	0	0	0	0	0	0	0	0	0	0	0	0	0	0	0	0	0	0	0	0	0	0	0
1544	116187	0.998	34.33	34.4	0.871	4.53	5.19	0.873	9.75	11.18	1.112	20.05	18.03	0.798	0.83	1.04	1.1368	53.4362	2	2	2	0	0	0	0	0	0	0	0	0	0	0	0	0	0	0	0	0	0	0	0	0	0	0	0	0	0	0	0
1545	116196	0.848	25.19	29.7	0.675	2.93	4.33	0.644	5.84	9.06	1.007	16.43	16.31	0.587	0.76	1.3	1.1306	46.2622	2	2	2	0	0	0	0	0	0	0	0	0	0	0	0	0	0	0	0	0	0	0	0	0	0	0	0	0	0	0	0
1546	116200	0.885	34.73	39.26	0.795	4.3	5.41	0.632	8.32	13.17	1.069	22.1	20.67	0.591	0.69	1.16	1.1423	50.5789	2	2	2	0	0	0	0	0	0	0	0	0	0	0	0	0	0	0	0	0	0	0	0	0	0	0	0	0	0	0	0
1547	116206	1.085	46.93	43.27	0.915	5.2	5.68	0.842	11.24	13.34	1.257	30.5	24.25	0.872	1.13	1.3	1.1346	48.2353	2	2	2	0	0	0	0	0	0	0	0	0	0	0	0	0	0	0	0	0	0	0	0	0	0	0	0	0	0	0	0
1548	116208	0.94	40.31	42.9	0.784	4.54	5.79	0.68	9.59	14.1	1.138	26.18	23.01	0.515	0.61	1.17	1.1422	49.7989	1	2	2	1	0	0	66	2	9	0	0	0	0	0	0	0	0	0	0	0	0	0	0	0	0	0	0	0	0	0	0
1549	116210	1.137	34.95	30.75	0.915	4.76	5.2	0.865	8.8	10.17	1.392	21.39	15.37	0.722	0.84	1.16	1.1345	47.5638	2	2	2	0	0	0	0	0	0	0	0	0	0	0	0	0	0	0	0	0	0	0	0	0	0	0	0	0	0	0	0
1550	116211	0.849	26.47	31.19	0.688	3.23	4.69	0.598	5.39	9.02	1.021	17.85	17.48	0.556	0.73	1.32	1.1448	44.1305	2	1	2	0	1	0	0	0	0	0	0	0	0	0	0	50	2	1	0	0	0	0	0	0	0	0	0	0	0	0	0
1551	116213	1.251	48.96	39.12	1.008	5.06	5.03	1.057	14.38	13.61	1.441	29.52	20.49	0.897	1.16	1.3	1.1549	44.3095	2	2	2	0	0	0	0	0	0	0	0	0	0	0	0	0	0	0	0	0	0	0	0	0	0	0	0	0	0	0	0
1552	116216	0.687	24.68	35.9	0.638	3.43	5.37	0.439	4.72	10.77	0.836	16.53	19.76	0.5	0.65	1.31	1.1377	53.0153	1	2	2	1	0	0	40	1	0	0	0	0	0	0	0	0	0	0	0	0	0	0	0	0	0	0	0	0	0	0	0
1553	116232	0.822	32.34	39.37	0.611	3.46	5.66	0.622	7.26	11.66	0.981	21.63	22.05	0.392	0.45	1.14	1.1369	48.0718	2	2	2	0	0	0	0	0	0	0	0	0	0	0	0	0	0	0	0	0	0	0	0	0	0	0	0	0	0	0	0
1554	116240	0.934	42.39	45.36	0.817	3.73	4.57	0.707	10.5	14.84	1.085	28.16	25.95	0.487	0.59	1.21	1.1325	49.0374	2	2	2	0	0	0	0	0	0	0	0	0	0	0	0	0	0	0	0	0	0	0	0	0	0	0	0	0	0	0	0
1555	116243	0.822	30.86	37.54	0.641	3.27	5.1	0.547	6.45	11.81	1.024	21.14	20.64	0.444	0.5	1.12	1.1376	49.1532	2	2	2	0	0	0	0	0	0	0	0	0	0	0	0	0	0	0	0	0	0	0	0	0	0	0	0	0	0	0	0
1556	116251	0.653	19.69	30.14	0.52	2.41	4.64	0.515	4.4	8.55	0.759	12.87	16.95	0.411	0.54	1.31	1.1469	56.4604	2	2	2	0	0	0	0	0	0	0	0	0	0	0	0	0	0	0	0	0	0	0	0	0	0	0	0	0	0	0	0
1557	116254	0.841	34.68	41.25	0.652	3.84	5.89	0.557	6.7	12.03	1.035	24.14	23.33	0.462	0.56	1.22	1.1369	50.0312	2	2	2	0	0	0	0	0	0	0	0	0	0	0	0	0	0	0	0	0	0	0	0	0	0	0	0	0	0	0	0
1558	116265	0.856	31.91	37.27	0.742	4.19	5.64	0.585	7.58	12.96	1.079	20.15	18.66	0.71	0.92	1.3	1.1359	47.9278	2	2	2	0	0	0	0	0	0	0	0	0	0	0	0	0	0	0	0	0	0	0	0	0	0	0	0	0	0	0	0
1559	116267	1.131	53.62	47.43	0.845	5.03	5.95	0.788	12.59	15.97	1.412	36.01	25.51	0.539	0.64	1.19	1.1539	45.9567	2	2	1	0	0	1	0	0	0	0	0	0	0	0	0	0	0	0	0	0	0	0	0	0	0	0	0	0	0	0	0
1560	116268	0.857	26.68	31.13	0.656	3.33	5.08	0.687	6.88	10.01	1.027	16.47	16.04	0.437	0.51	1.16	1.1332	45.0356	2	2	2	0	0	0	0	0	0	0	0	0	0	0	0	0	0	0	0	0	0	0	0	0	0	0	0	0	0	0	0
1561	116270	0.92	36.76	39.93	0.796	4.23	5.31	0.698	8.2	11.74	1.063	24.33	22.88	0.582	0.67	1.15	1.1504	42.6869	2	2	2	0	0	0	0	0	0	0	0	0	0	0	0	0	0	0	0	0	0	0	0	0	0	0	0	0	0	0	0
1562	116271	0.809	23.71	29.32	0.696	3.13	4.49	0.583	5.59	9.59	0.984	14.99	15.24	0.599	0.79	1.32	1.151	47.0975	2	2	2	0	0	0	0	0	0	0	0	0	0	0	0	0	0	0	0	0	0	0	0	0	0	0	0	0	0	0	0
1563	116277	0.966	29.35	30.38	0.696	3.34	4.79	0.727	6.83	9.4	1.184	19.18	16.19	0.582	0.6	1.04	1.1567	44.5673	2	2	2	0	0	0	0	0	0	0	0	0	0	0	0	0	0	0	0	0	0	0	0	0	0	0	0	0	0	0	0
1564	116280	0.912	33.11	36.29	0.691	3.53	5.11	0.752	8.6	11.43	1.062	20.99	19.76	0.485	0.56	1.16	1.1566	45.3075	2	2	2	0	0	0	0	0	0	0	0	0	0	0	0	0	0	0	0	0	0	0	0	0	0	0	0	0	0	0	0
1565	116281	0.867	38.97	44.94	0.681	3.91	5.75	0.559	7.97	14.24	1.086	27.1	24.95	0.465	0.56	1.22	1.1552	46.7789	2	2	2	0	0	0	0	0	0	0	0	0	0	0	0	0	0	0	0	0	0	0	0	0	0	0	0	0	0	0	0
1566	116283	1.107	47.81	43.18	0.93	5.05	5.42	0.77	10.16	13.2	1.328	32.6	24.55	0.718	0.83	1.16	1.1349	48.6178	2	2	2	0	0	0	0	0	0	0	0	0	0	0	0	0	0	0	0	0	0	0	0	0	0	0	0	0	0	0	0
1567	116286	0.957	46.79	48.88	0.836	4.81	5.76	0.71	9.64	13.59	1.095	32.34	29.54	0.626	0.81	1.3	1.1518	44.911	2	2	2	0	0	0	0	0	0	0	0	0	0	0	0	0	0	0	0	0	0	0	0	0	0	0	0	0	0	0	0
1568	116292	1.029	40.99	39.85	0.844	4.7	5.58	0.671	7.22	10.77	1.236	29.06	23.5	0.705	0.92	1.31	1.1344	51.4279	2	2	2	0	0	0	0	0	0	0	0	0	0	0	0	0	0	0	0	0	0	0	0	0	0	0	0	0	0	0	0
1569	116295	0.839	29.63	35.33	0.813	4.2	5.16	0.615	5.97	9.71	0.951	19.47	20.46	0.578	0.6	1.03	1.1458	53.3931	2	2	2	0	0	0	0	0	0	0	0	0	0	0	0	0	0	0	0	0	0	0	0	0	0	0	0	0	0	0	0
1570	116299	0.774	23.73	30.64	0.643	3.24	5.04	0.641	6.42	10.03	0.903	14.07	15.57	0.416	0.48	1.14	1.1397	53.1575	2	2	2	0	0	0	0	0	0	0	0	0	0	0	0	0	0	0	0	0	0	0	0	0	0	0	0	0	0	0	0
1571	116303	0.843	31.3	37.13	0.645	3.36	5.2	0.627	6.9	11	1.006	21.04	20.92	0.441	0.5	1.14	1.1395	52.3286	2	2	2	0	0	0	0	0	0	0	0	0	0	0	0	0	0	0	0	0	0	0	0	0	0	0	0	0	0	0	0
1572	116307	0.929	42.14	45.34	0.745	4.38	5.88	0.618	9.58	15.5	1.176	28.18	23.96	0.432	0.51	1.17	1.1394	51.4281	2	2	2	0	0	0	0	0	0	0	0	0	0	0	0	0	0	0	0	0	0	0	0	0	0	0	0	0	0	0	0
1573	116313	0.636	19.35	30.45	0.509	2.78	5.47	0.51	5.52	10.83	0.781	11.05	14.15	0.385	0.45	1.16	1.162	48.9106	2	2	2	0	0	0	0	0	0	0	0	0	0	0	0	0	0	0	0	0	0	0	0	0	0	0	0	0	0	0	0
1574	116322	0.839	26.26	31.3	0.663	3.32	5.01	0.62	6.41	10.34	1.036	16.53	15.95	0.492	0.55	1.12	1.1324	47.3386	2	2	2	0	0	0	0	0	0	0	0	0	0	0	0	0	0	0	0	0	0	0	0	0	0	0	0	0	0	0	0
1575	116325	1.15	44.31	38.54	0.958	5.14	5.37	0.823	10.4	12.63	1.401	28.76	20.53	0.668	0.77	1.16	1.1269	44.4539	2	2	2	0	0	0	0	0	0	0	0	0	0	0	0	0	0	0	0	0	0	0	0	0	0	0	0	0	0	0	0
1576	116327	0.982	38.77	39.49	0.996	5.2	5.22	0.703	9.94	14.14	1.174	23.63	20.13	0.704	0.82	1.16	1.1362	50.3621	2	2	2	0	0	0	0	0	0	0	0	0	0	0	0	0	0	0	0	0	0	0	0	0	0	0	0	0	0	0	0
1577	116334	1.211	47.8	39.48	0.979	5.24	5.36	0.964	13.48	13.99	1.443	29.07	20.14	0.768	0.9	1.17	1.1263	51.0912	2	2	2	0	0	0	0	0	0	0	0	0	0	0	0	0	0	0	0	0	0	0	0	0	0	0	0	0	0	0	0
1578	116339	0.928	48.76	52.53	0.72	4.68	6.51	0.666	11.09	16.66	1.124	33	29.37	0.377	0.42	1.11	1.1362	46.4973	2	2	2	0	0	0	0	0	0	0	0	0	0	0	0	0	0	0	0	0	0	0	0	0	0	0	0	0	0	0	0
1579	116341	1.006	32.77	32.58	0.852	4.21	4.94	0.748	7.59	10.14	1.199	20.98	17.49	0.756	0.78	1.04	1.145	53.4928	2	2	2	0	0	0	0	0	0	0	0	0	0	0	0	0	0	0	0	0	0	0	0	0	0	0	0	0	0	0	0
1580	116344	0.74	30.96	41.83	0.62	3.33	5.38	0.512	7.22	14.12	0.914	20.4	22.33	0.333	0.34	1.03	1.1415	50.3888	2	2	2	0	0	0	0	0	0	0	0	0	0	0	0	0	0	0	0	0	0	0	0	0	0	0	0	0	0	0	0
1581	116345	1.065	28.33	26.6	0.932	3.78	4.05	0.854	6.25	7.32	1.202	18.3	15.23	0.952	1.25	1.32	1.1479	47.1704	2	2	2	0	0	0	0	0	0	0	0	0	0	0	0	0	0	0	0	0	0	0	0	0	0	0	0	0	0	0	0
1582	116346	0.844	38.83	45.99	0.623	3.47	5.58	0.634	8.7	13.71	0.998	26.66	26.71	0.473	0.61	1.3	1.1319	46.6412	2	2	1	0	0	1	0	0	0	0	0	0	0	0	0	0	0	0	0	0	0	0	0	0	0	0	0	0	0	0	0
1583	116347	1.094	50.93	46.55	1.042	6.16	5.91	0.909	12.26	13.5	1.198	32.5	27.13	0.887	1.17	1.32	1.1452	43.0367	2	2	2	0	0	0	0	0	0	0	0	0	0	0	0	0	0	0	0	0	0	0	0	0	0	0	0	0	0	0	0
1584	116354	1.146	35.74	31.18	1.039	4.9	4.72	0.907	8.78	9.69	1.315	22.06	16.77	0.863	0.89	1.04	1.1295	44.6154	2	2	2	0	0	0	0	0	0	0	0	0	0	0	0	0	0	0	0	0	0	0	0	0	0	0	0	0	0	0	0
1585	116357	0.845	26.47	31.32	0.687	3.14	4.57	0.609	6.37	10.45	1.041	16.96	16.29	0.515	0.57	1.12	1.1547	47.4493	2	2	2	0	0	0	0	0	0	0	0	0	0	0	0	0	0	0	0	0	0	0	0	0	0	0	0	0	0	0	0
1586	116374	0.804	31.48	39.17	0.657	4.07	6.2	0.609	9.18	15.09	1.019	18.23	17.88	0.521	0.54	1.04	1.1407	50.4646	2	2	2	0	0	0	0	0	0	0	0	0	0	0	0	0	0	0	0	0	0	0	0	0	0	0	0	0	0	0	0
1587	116375	1.225	54.76	44.72	0.982	5.47	5.57	0.892	12.3	13.79	1.458	36.98	25.36	0.809	0.94	1.17	1.1288	46.7446	2	2	2	0	0	0	0	0	0	0	0	0	0	0	0	0	0	0	0	0	0	0	0	0	0	0	0	0	0	0	0
1588	116376	1.177	51.99	44.17	0.999	6.09	6.1	0.846	13.88	16.4	1.478	32.02	21.67	0.607	0.67	1.1	1.1347	45.4598	2	2	2	0	0	0	0	0	0	0	0	0	0	0	0	0	0	0	0	0	0	0	0	0	0	0	0	0	0	0	0
1589	116380	0.926	36.36	39.29	0.853	4.28	5.02	0.647	8.41	12.99	1.113	23.68	21.28	0.655	0.73	1.12	1.1573	45.6993	2	2	2	0	0	0	0	0	0	0	0	0	0	0	0	0	0	0	0	0	0	0	0	0	0	0	0	0	0	0	0
1590	116381	0.904	35.25	38.99	0.692	3.72	5.38	0.683	7.64	11.2	1.066	23.89	22.41	0.599	0.78	1.3	1.1326	52.1775	2	2	2	0	0	0	0	0	0	0	0	0	0	0	0	0	0	0	0	0	0	0	0	0	0	0	0	0	0	0	0
1591	116384	0.904	26.37	29.18	0.729	3.27	4.48	0.712	6.46	9.08	1.066	16.64	15.62	0.53	0.62	1.18	1.154	47.3918	2	2	2	0	0	0	0	0	0	0	0	0	0	0	0	0	0	0	0	0	0	0	0	0	0	0	0	0	0	0	0
1592	116385	1.043	29.87	28.63	0.869	3.66	4.22	0.851	9.05	10.64	1.245	17.15	13.77	0.59	0.66	1.11	1.123	41.9541	2	2	1	0	0	1	0	0	0	0	0	0	0	0	0	0	0	0	0	0	0	0	0	0	0	0	0	0	0	0	0
1593	116387	1.036	36.88	35.59	0.877	4.81	5.48	0.71	8.17	11.51	1.285	23.9	18.6	0.622	0.72	1.15	1.1392	47.1711	2	2	2	0	0	0	0	0	0	0	0	0	0	0	0	0	0	0	0	0	0	0	0	0	0	0	0	0	0	0	0
1594	116389	0.677	25.38	37.48	0.553	3.02	5.46	0.536	6.12	11.42	0.788	16.23	20.6	0.226	0.25	1.12	1.1548	43.212	2	2	2	0	0	0	0	0	0	0	0	0	0	0	0	0	0	0	0	0	0	0	0	0	0	0	0	0	0	0	0
1595	116397	0.544	16.98	31.22	0.488	2.22	4.54	0.478	4.43	9.27	0.593	10.33	17.41	0.333	0.41	1.23	1.1407	55.2628	2	2	2	0	0	0	0	0	0	0	0	0	0	0	0	0	0	0	0	0	0	0	0	0	0	0	0	0	0	0	0
1596	116400	0.931	35.66	38.28	0.763	3.93	5.14	0.659	9.33	14.15	1.18	22.41	18.99	0.584	0.6	1.04	1.1483	52.1846	2	2	2	0	0	0	0	0	0	0	0	0	0	0	0	0	0	0	0	0	0	0	0	0	0	0	0	0	0	0	0
1597	116404	0.88	28.14	31.97	0.676	3.14	4.65	0.584	6.29	10.78	1.131	18.71	16.54	0.523	0.54	1.04	1.1386	54.6524	2	2	2	0	0	0	0	0	0	0	0	0	0	0	0	0	0	0	0	0	0	0	0	0	0	0	0	0	0	0	0
1598	116405	0.948	29.04	30.64	0.712	3.61	5.07	0.709	7.19	10.13	1.181	18.24	15.44	0.509	0.56	1.1	1.1384	50.0606	2	2	2	0	0	0	0	0	0	0	0	0	0	0	0	0	0	0	0	0	0	0	0	0	0	0	0	0	0	0	0
1599	116406	1.093	43.57	39.85	0.933	4.94	5.3	0.826	10.98	13.29	1.3	27.65	21.26	0.732	0.79	1.08	1.1277	50.8683	2	2	2	0	0	0	0	0	0	0	0	0	0	0	0	0	0	0	0	0	0	0	0	0	0	0	0	0	0	0	0
1600	116411	0.951	45.56	47.93	0.606	3.51	5.79	0.754	12.13	16.08	1.148	29.93	26.06	0.342	0.45	1.31	1.1443	49.808	2	2	2	0	0	0	0	0	0	0	0	0	0	0	0	0	0	0	0	0	0	0	0	0	0	0	0	0	0	0	0
1601	116421	1.014	45.76	45.14	0.856	4.77	5.58	0.685	8.74	12.76	1.203	32.24	26.81	0.635	0.84	1.32	1.1456	42.9876	2	2	2	0	0	0	0	0	0	0	0	0	0	0	0	0	0	0	0	0	0	0	0	0	0	0	0	0	0	0	0
1602	116423	0.837	31.28	37.37	0.776	3.94	5.07	0.591	7.48	12.67	1.012	19.86	19.62	0.682	0.71	1.04	1.141	50.1529	2	2	2	0	0	0	0	0	0	0	0	0	0	0	0	0	0	0	0	0	0	0	0	0	0	0	0	0	0	0	0
1603	116430	0.873	38.42	44	0.654	3.93	6.01	0.706	9.58	13.57	1.02	24.91	24.42	0.493	0.59	1.2	1.1338	48.115	2	2	2	0	0	0	0	0	0	0	0	0	0	0	0	0	0	0	0	0	0	0	0	0	0	0	0	0	0	0	0
1604	116432	0.828	30.38	36.67	0.671	3.95	5.88	0.577	7.13	12.37	1.048	19.3	18.42	0.471	0.55	1.17	1.1548	47.9929	2	2	2	0	0	0	0	0	0	0	0	0	0	0	0	0	0	0	0	0	0	0	0	0	0	0	0	0	0	0	0
1605	116435	0.794	20.83	26.24	0.649	2.95	4.55	0.573	4.91	8.56	0.989	12.97	13.12	0.473	0.53	1.11	1.1493	44.2936	2	2	2	0	0	0	0	0	0	0	0	0	0	0	0	0	0	0	0	0	0	0	0	0	0	0	0	0	0	0	0
1606	116437	1.124	41.55	36.98	0.822	4.46	5.42	0.828	11.94	14.43	1.468	25.15	17.13	0.551	0.64	1.16	1.1395	40.8412	2	2	2	0	0	0	0	0	0	0	0	0	0	0	0	0	0	0	0	0	0	0	0	0	0	0	0	0	0	0	0
1607	116441	0.841	32.15	38.22	0.601	3.36	5.59	0.647	8.49	13.13	1.041	20.3	19.51	0.376	0.42	1.12	1.1565	46.1824	2	2	2	0	0	0	0	0	0	0	0	0	0	0	0	0	0	0	0	0	0	0	0	0	0	0	0	0	0	0	0
1608	116442	1.094	45.08	41.21	0.884	4.54	5.14	0.835	9.75	11.68	1.262	30.79	24.39	0.611	0.71	1.16	1.1311	45.4758	2	2	2	0	0	0	0	0	0	0	0	0	0	0	0	0	0	0	0	0	0	0	0	0	0	0	0	0	0	0	0
1609	116444	0.98	34.97	35.69	0.751	4.21	5.61	0.733	6.81	9.29	1.152	23.95	20.79	0.562	0.66	1.17	1.146	45.2556	2	2	2	0	0	0	0	0	0	0	0	0	0	0	0	0	0	0	0	0	0	0	0	0	0	0	0	0	0	0	0
1610	116447	0.991	40.65	41.02	0.769	4.26	5.54	0.722	8.53	11.81	1.177	27.86	23.67	0.536	0.63	1.17	1.1333	49.6887	2	1	2	0	1	0	0	0	0	0	0	0	0	0	0	13	1	0	0	0	0	0	0	0	0	0	0	0	0	0	0
1611	116455	0.885	25.13	28.39	0.694	2.98	4.29	0.741	5.9	7.96	1.007	16.25	16.14	0.655	0.85	1.3	1.1382	54.052	2	2	2	0	0	0	0	0	0	0	0	0	0	0	0	0	0	0	0	0	0	0	0	0	0	0	0	0	0	0	0
1612	116456	0.873	42.34	48.56	0.595	3.81	6.4	0.617	8.52	13.82	1.058	30	28.35	0.318	0.37	1.15	1.147	45.3197	2	2	2	0	0	0	0	0	0	0	0	0	0	0	0	0	0	0	0	0	0	0	0	0	0	0	0	0	0	0	0
1613	116459	1.02	48.62	47.66	0.891	5.03	5.65	0.71	10.59	14.91	1.218	33	27.1	0.599	0.69	1.15	1.1341	49.2804	2	1	2	0	1	0	0	0	0	0	0	0	0	0	0	17	1	0	0	0	0	0	0	0	0	0	0	0	0	0	0
1614	116461	0.932	49.34	52.96	0.755	4.68	6.2	0.634	10.32	16.27	1.126	34.35	30.49	0.421	0.44	1.04	1.1351	49.4795	2	1	2	0	1	0	0	0	0	0	0	0	0	0	0	75	2	3	0	0	0	0	0	0	0	0	0	0	0	0	0
1615	116463	0.855	40.44	47.32	0.732	4.3	5.88	0.663	10.08	15.21	0.993	26.06	26.24	0.523	0.6	1.16	1.1401	50.3971	2	2	2	0	0	0	0	0	0	0	0	0	0	0	0	0	0	0	0	0	0	0	0	0	0	0	0	0	0	0	0
1616	116467	1.014	43.22	42.63	0.91	5.26	5.78	0.686	9.51	13.88	1.239	28.45	22.97	0.666	0.73	1.09	1.1351	49.6301	2	2	2	0	0	0	0	0	0	0	0	0	0	0	0	0	0	0	0	0	0	0	0	0	0	0	0	0	0	0	0
1617	116472	0.948	32.3	34.06	0.766	4	5.22	0.724	8.78	12.14	1.169	19.52	16.7	0.524	0.61	1.16	1.14	46.6624	2	1	2	0	1	0	0	0	0	0	0	0	0	0	0	53	2	1	0	0	0	0	0	0	0	0	0	0	0	0	0
1618	116474	0.915	36.11	39.47	0.609	3.48	5.71	0.71	10.69	15.05	1.173	21.94	18.71	0.406	0.47	1.15	1.1541	46.662	2	1	1	0	1	2	0	0	0	0	0	0	0	0	0	99999	1	0	0	0	0	0	0	0	0	0	0	0	0	0	0
1619	116483	0.507	19.65	38.73	0.378	2.06	5.45	0.398	4.69	11.8	0.6	12.9	21.48	0.266	0.35	1.32	1.1551	48.8991	2	1	2	0	1	0	0	0	0	0	0	0	0	0	0	63	2	1	0	0	0	0	0	0	0	0	0	0	0	0	0
1620	116484	0.753	32.13	42.69	0.581	3.38	5.83	0.486	7.74	15.93	1.004	21.01	20.93	0.34	0.4	1.17	1.1366	49.4886	2	2	2	0	0	0	0	0	0	0	0	0	0	0	0	0	0	0	0	0	0	0	0	0	0	0	0	0	0	0	0
1621	116485	0.974	35.82	36.77	0.72	3.96	5.51	0.696	8.68	12.48	1.233	23.18	18.79	0.578	0.67	1.16	1.1412	49.5079	2	2	2	0	0	0	0	0	0	0	0	0	0	0	0	0	0	0	0	0	0	0	0	0	0	0	0	0	0	0	0
1622	116486	0.864	40.02	46.31	0.622	3.53	5.67	0.658	9.79	14.87	1.036	26.7	25.77	0.371	0.43	1.16	1.147	52.2052	2	2	2	0	0	0	0	0	0	0	0	0	0	0	0	0	0	0	0	0	0	0	0	0	0	0	0	0	0	0	0
1623	116493	0.78	37.09	47.57	0.632	3.37	5.34	0.471	7	14.88	0.977	26.72	27.35	0.364	0.47	1.3	1.1599	46.0625	2	2	2	0	0	0	0	0	0	0	0	0	0	0	0	0	0	0	0	0	0	0	0	0	0	0	0	0	0	0	0
1624	116495	0.84	26.93	32.04	0.754	3.61	4.79	0.648	6.79	10.48	0.986	16.53	16.78	0.551	0.62	1.12	1.1414	49.5684	2	2	2	0	0	0	0	0	0	0	0	0	0	0	0	0	0	0	0	0	0	0	0	0	0	0	0	0	0	0	0
1625	116499	1.117	31.69	28.37	1.084	4	3.69	0.873	8.29	9.5	1.278	19.41	15.19	0.9	1.02	1.14	1.1494	44.5794	2	2	9	0	0	0	0	0	0	0	0	0	0	0	0	0	0	0	0	0	0	0	0	0	0	0	0	0	0	0	0
1626	116500	1.016	39.11	38.51	0.879	4.41	5.02	0.7	8.09	11.56	1.213	26.61	21.93	0.633	0.74	1.16	1.132	47.2106	2	1	2	0	1	0	0	0	0	0	0	0	0	0	0	20	1	0	0	0	0	0	0	0	0	0	0	0	0	0	0
1627	116502	0.787	28.45	36.16	0.773	4	5.18	0.678	7.02	10.35	0.845	17.43	20.63	0.431	0.49	1.13	1.1491	47.6318	2	2	2	0	0	0	0	0	0	0	0	0	0	0	0	0	0	0	0	0	0	0	0	0	0	0	0	0	0	0	0
1628	116503	0.864	29.91	35.38	0.673	3.33	4.94	0.668	7.86	11.76	1.003	18.73	18.67	0.409	0.47	1.16	1.157	46.5018	2	2	2	0	0	0	0	0	0	0	0	0	0	0	0	0	0	0	0	0	0	0	0	0	0	0	0	0	0	0	0
1629	116504	0.726	24.26	33.44	0.66	3.25	4.92	0.567	6.04	10.64	0.838	14.98	17.87	0.506	0.67	1.32	1.1542	47.2326	2	2	2	0	0	0	0	0	0	0	0	0	0	0	0	0	0	0	0	0	0	0	0	0	0	0	0	0	0	0	0
1630	116507	0.805	21.29	26.45	0.763	3.1	4.07	0.616	5.07	8.24	0.928	13.12	14.14	0.687	0.9	1.32	1.1496	47.2667	2	2	2	0	0	0	0	0	0	0	0	0	0	0	0	0	0	0	0	0	0	0	0	0	0	0	0	0	0	0	0
1631	116510	1.076	34.49	32.06	0.909	4.35	4.78	0.789	7.64	9.68	1.279	22.51	17.6	0.768	0.89	1.16	1.1328	47.7514	2	2	2	0	0	0	0	0	0	0	0	0	0	0	0	0	0	0	0	0	0	0	0	0	0	0	0	0	0	0	0
1632	116522	1.101	45.74	41.54	0.811	4.56	5.63	0.858	10.69	12.46	1.3	30.49	23.45	0.664	0.87	1.3	1.1307	49.5054	2	2	2	0	0	0	0	0	0	0	0	0	0	0	0	0	0	0	0	0	0	0	0	0	0	0	0	0	0	0	0
1633	116531	1.112	54.98	49.45	0.914	5.03	5.5	0.811	11.51	14.2	1.292	38.44	29.75	0.876	1.14	1.3	1.1309	44.875	2	1	2	0	1	0	0	0	0	0	0	0	0	0	0	50	2	2	0	0	0	0	0	0	0	0	0	0	0	0	0
1634	116533	0.637	20.99	32.97	0.543	2.26	4.16	0.462	4.05	8.77	0.733	14.68	20.04	0.41	0.53	1.3	1.1389	51.597	2	2	2	0	0	0	0	0	0	0	0	0	0	0	0	0	0	0	0	0	0	0	0	0	0	0	0	0	0	0	0
1635	116542	1.294	52.03	40.2	1.065	5.82	5.47	0.995	13.05	13.11	1.533	33.16	21.63	0.923	1.07	1.16	1.1559	47.1925	2	2	2	0	0	0	0	0	0	0	0	0	0	0	0	0	0	0	0	0	0	0	0	0	0	0	0	0	0	0	0
1636	116547	0.884	29.15	32.99	0.645	3.47	5.37	0.635	6.76	10.64	1.115	18.92	16.97	0.556	0.73	1.32	1.1481	46.0234	2	2	2	0	0	0	0	0	0	0	0	0	0	0	0	0	0	0	0	0	0	0	0	0	0	0	0	0	0	0	0
1637	116552	0.797	24.9	31.23	0.616	3.07	4.99	0.626	6.63	10.58	0.971	15.2	15.66	0.404	0.47	1.16	1.1376	51.3538	2	2	2	0	0	0	0	0	0	0	0	0	0	0	0	0	0	0	0	0	0	0	0	0	0	0	0	0	0	0	0
1638	116555	1.252	61.33	48.97	1.081	6.51	6.02	0.958	14.84	15.5	1.456	39.99	27.46	1.002	1.3	1.3	1.1558	45.6013	2	2	2	0	0	0	0	0	0	0	0	0	0	0	0	0	0	0	0	0	0	0	0	0	0	0	0	0	0	0	0
1639	116556	0.776	26.47	34.11	0.633	3.27	5.18	0.58	7.1	12.25	0.965	16.09	16.68	0.664	0.67	1.02	1.1536	45.4994	2	2	2	0	0	0	0	0	0	0	0	0	0	0	0	0	0	0	0	0	0	0	0	0	0	0	0	0	0	0	0
1640	116562	0.871	34.94	40.1	0.745	3.97	5.34	0.684	10.01	14.62	1.041	20.96	20.14	0.476	0.56	1.18	1.1573	45.2072	2	2	2	0	0	0	0	0	0	0	0	0	0	0	0	0	0	0	0	0	0	0	0	0	0	0	0	0	0	0	0
1641	116564	1.004	49.07	48.88	0.806	5.19	6.44	0.701	11.12	15.88	1.233	32.76	26.57	0.512	0.61	1.18	1.1279	50.7944	2	2	2	0	0	0	0	0	0	0	0	0	0	0	0	0	0	0	0	0	0	0	0	0	0	0	0	0	0	0	0
1642	116569	1.015	46.13	45.43	0.738	4.46	6.04	0.765	11.33	14.82	1.235	30.34	24.57	0.464	0.52	1.12	1.1382	50.4458	2	1	2	0	1	0	0	0	0	0	0	0	0	0	0	6	1	0	0	0	0	0	0	0	0	0	0	0	0	0	0
1643	116572	0.678	23.05	34	0.595	3.05	5.12	0.479	5.61	11.71	0.838	14.39	17.17	0.365	0.42	1.16	1.1465	53.1281	2	2	2	0	0	0	0	0	0	0	0	0	0	0	0	0	0	0	0	0	0	0	0	0	0	0	0	0	0	0	0
1644	116574	0.667	23.45	35.17	0.627	2.86	4.56	0.454	4.71	10.36	0.784	15.88	20.25	0.34	0.39	1.16	1.1342	49.1496	2	2	2	0	0	0	0	0	0	0	0	0	0	0	0	0	0	0	0	0	0	0	0	0	0	0	0	0	0	0	0
1645	116580	1.009	30.96	30.67	0.837	4.15	4.96	0.732	7.73	10.55	1.259	19.07	15.16	0.75	0.84	1.12	1.1553	50.3594	2	2	2	0	0	0	0	0	0	0	0	0	0	0	0	0	0	0	0	0	0	0	0	0	0	0	0	0	0	0	0
1646	116582	0.93	33.18	35.69	0.75	3.77	5.03	0.679	7.03	10.34	1.101	22.38	20.32	0.527	0.61	1.15	1.1449	51.2566	2	2	2	0	0	0	0	0	0	0	0	0	0	0	0	0	0	0	0	0	0	0	0	0	0	0	0	0	0	0	0
1647	116584	0.908	39.45	43.46	0.666	3.69	5.55	0.743	11.55	15.55	1.083	24.21	22.36	0.36	0.42	1.16	1.1516	45.4357	2	2	2	0	0	0	0	0	0	0	0	0	0	0	0	0	0	0	0	0	0	0	0	0	0	0	0	0	0	0	0
1648	116587	1.073	45.88	42.74	0.838	4.66	5.56	0.768	8.41	10.95	1.251	32.8	26.22	0.724	0.94	1.3	1.1298	44.8258	2	2	2	0	0	0	0	0	0	0	0	0	0	0	0	0	0	0	0	0	0	0	0	0	0	0	0	0	0	0	0
1649	116588	1.215	47.84	39.36	1.047	5.92	5.66	0.888	10.35	11.65	1.431	31.56	22.05	1.053	1.39	1.32	1.1431	42.574	2	2	2	0	0	0	0	0	0	0	0	0	0	0	0	0	0	0	0	0	0	0	0	0	0	0	0	0	0	0	0
1650	116589	1.242	52.43	42.21	1.043	5.33	5.11	0.923	12	13.01	1.457	35.09	24.08	0.779	0.91	1.17	1.1379	50.3078	2	2	2	0	0	0	0	0	0	0	0	0	0	0	0	0	0	0	0	0	0	0	0	0	0	0	0	0	0	0	0
1651	116596	0.889	40.59	45.67	0.745	4.79	6.43	0.638	9.12	14.3	1.069	26.68	24.95	0.415	0.46	1.12	1.1309	45.7329	2	2	2	0	0	0	0	0	0	0	0	0	0	0	0	0	0	0	0	0	0	0	0	0	0	0	0	0	0	0	0
1652	116600	0.919	35.09	38.2	0.727	4	5.5	0.64	7.68	11.99	1.131	23.41	20.7	0.602	0.62	1.04	1.1345	47.2202	2	2	2	0	0	0	0	0	0	0	0	0	0	0	0	0	0	0	0	0	0	0	0	0	0	0	0	0	0	0	0
1653	116605	0.962	35.09	36.47	0.758	4.38	5.78	0.556	5.18	9.31	1.194	25.53	21.39	0.392	0.51	1.3	1.1434	43.1767	2	2	2	0	0	0	0	0	0	0	0	0	0	0	0	0	0	0	0	0	0	0	0	0	0	0	0	0	0	0	0
1654	116607	0.93	30.2	32.46	0.78	3.97	5.09	0.716	7.37	10.28	1.104	18.86	17.09	0.472	0.54	1.13	1.1461	44.3656	2	2	2	0	0	0	0	0	0	0	0	0	0	0	0	0	0	0	0	0	0	0	0	0	0	0	0	0	0	0	0
1655	116608	0.814	25.97	31.9	0.613	3.06	4.99	0.746	7.09	9.51	0.909	15.82	17.4	0.519	0.67	1.3	1.1358	48.1257	2	1	2	0	2	0	0	0	0	0	0	0	0	0	0	7	1	0	70	2	1	0	0	0	0	0	0	0	0	0	0
1656	116610	0.908	27.64	30.44	0.732	3.47	4.74	0.628	6.03	9.6	1.126	18.14	16.1	0.666	0.77	1.16	1.156	47.1686	2	2	2	0	0	0	0	0	0	0	0	0	0	0	0	0	0	0	0	0	0	0	0	0	0	0	0	0	0	0	0
1657	116616	0.975	39.67	40.69	0.844	4.62	5.48	0.734	8.98	12.24	1.134	26.07	22.98	0.794	1.04	1.32	1.1485	42.347	2	2	2	0	0	0	0	0	0	0	0	0	0	0	0	0	0	0	0	0	0	0	0	0	0	0	0	0	0	0	0
1658	116617	1.019	37.22	36.51	0.723	3.9	5.39	0.808	10.07	12.46	1.246	23.25	18.66	0.639	0.83	1.3	1.1547	47.0358	2	2	2	0	0	0	0	0	0	0	0	0	0	0	0	0	0	0	0	0	0	0	0	0	0	0	0	0	0	0	0
1659	116620	1.241	60.21	48.5	0.975	5.82	5.97	0.921	14.32	15.54	1.485	40.06	26.98	0.724	0.85	1.17	1.1446	42.1551	2	2	2	0	0	0	0	0	0	0	0	0	0	0	0	0	0	0	0	0	0	0	0	0	0	0	0	0	0	0	0
1660	116622	0.688	28.43	41.33	0.552	3.16	5.73	0.475	6.6	13.9	0.86	18.66	21.7	0.381	0.5	1.31	1.1411	55.3119	2	2	2	0	0	0	0	0	0	0	0	0	0	0	0	0	0	0	0	0	0	0	0	0	0	0	0	0	0	0	0
1661	116623	0.865	26.86	31.04	0.712	3.24	4.55	0.706	7.72	10.94	1.022	15.89	15.55	0.501	0.58	1.16	1.1311	48.3213	2	2	2	0	0	0	0	0	0	0	0	0	0	0	0	0	0	0	0	0	0	0	0	0	0	0	0	0	0	0	0
1662	116625	0.649	20.49	31.58	0.554	2.61	4.71	0.467	5.12	10.97	0.803	12.76	15.9	0.4	0.47	1.16	1.1391	53.1132	2	1	2	0	1	0	0	0	0	0	0	0	0	0	0	79	2	1	0	0	0	0	0	0	0	0	0	0	0	0	0
1663	116628	0.837	35.1	41.92	0.751	4.39	5.85	0.59	7.53	12.75	0.994	23.18	23.32	0.445	0.54	1.22	1.1607	46.6591	2	1	2	0	1	0	0	0	0	0	0	0	0	0	0	18	1	0	0	0	0	0	0	0	0	0	0	0	0	0	0
1664	116632	1.073	51.99	48.44	0.883	5.14	5.82	0.94	12.42	13.22	1.171	34.43	29.4	0.439	0.49	1.12	1.1288	47.015	2	2	2	0	0	0	0	0	0	0	0	0	0	0	0	0	0	0	0	0	0	0	0	0	0	0	0	0	0	0	0
1665	116634	0.961	47.9	49.86	0.744	4.95	6.65	0.686	11.85	17.28	1.199	31.1	25.93	0.459	0.5	1.1	1.1341	48.3478	2	2	2	0	0	0	0	0	0	0	0	0	0	0	0	0	0	0	0	0	0	0	0	0	0	0	0	0	0	0	0
1666	116642	0.529	16.33	30.86	0.413	2.1	5.08	0.381	3.82	10.03	0.661	10.41	15.75	0.208	0.22	1.06	1.143	50.8844	2	1	2	0	1	0	0	0	0	0	0	0	0	0	0	72	2	1	0	0	0	0	0	0	0	0	0	0	0	0	0
1667	116646	0.71	23.05	32.48	0.584	2.92	5	0.536	5.38	10.04	0.846	14.75	17.44	0.484	0.63	1.3	1.1404	50.2559	2	2	2	0	0	0	0	0	0	0	0	0	0	0	0	0	0	0	0	0	0	0	0	0	0	0	0	0	0	0	0
1668	116649	0.72	21.13	29.36	0.56	2.66	4.74	0.546	5.35	9.8	0.886	13.12	14.81	0.324	0.38	1.17	1.1553	49.2651	2	2	2	0	0	0	0	0	0	0	0	0	0	0	0	0	0	0	0	0	0	0	0	0	0	0	0	0	0	0	0
1669	116650	0.846	27.01	31.92	0.702	3.12	4.45	0.613	6.18	10.07	1.018	17.71	17.4	0.517	0.6	1.16	1.1483	50.9974	2	2	2	0	0	0	0	0	0	0	0	0	0	0	0	0	0	0	0	0	0	0	0	0	0	0	0	0	0	0	0
1670	116654	1.151	39.31	34.16	0.918	4.51	4.91	0.936	10.28	10.98	1.343	24.52	18.27	0.897	1.16	1.3	1.1382	47.0632	2	2	2	0	0	0	0	0	0	0	0	0	0	0	0	0	0	0	0	0	0	0	0	0	0	0	0	0	0	0	0
1671	116660	0.678	21.2	31.25	0.607	2.35	3.87	0.537	4.81	8.96	0.762	14.04	18.42	0.423	0.49	1.15	1.1489	47.4973	2	2	2	0	0	0	0	0	0	0	0	0	0	0	0	0	0	0	0	0	0	0	0	0	0	0	0	0	0	0	0
1672	116666	1.09	50.76	46.58	0.937	5.68	6.05	0.733	10.26	14.01	1.314	34.83	26.52	0.638	0.73	1.14	1.1229	43.3806	2	2	2	0	0	0	0	0	0	0	0	0	0	0	0	0	0	0	0	0	0	0	0	0	0	0	0	0	0	0	0
1673	116667	0.87	27.35	31.44	0.713	3.3	4.62	0.555	5.34	9.62	1.088	18.72	17.2	0.465	0.51	1.1	1.1451	52.5255	2	2	2	0	0	0	0	0	0	0	0	0	0	0	0	0	0	0	0	0	0	0	0	0	0	0	0	0	0	0	0
1674	116691	0.905	28.21	31.16	0.761	3.47	4.56	0.649	6.37	9.83	1.095	18.37	16.77	0.589	0.69	1.17	1.146	45.8204	2	2	2	0	0	0	0	0	0	0	0	0	0	0	0	0	0	0	0	0	0	0	0	0	0	0	0	0	0	0	0
1675	116693	0.863	31.57	36.6	0.714	4.12	5.78	0.606	6.47	10.68	1.041	20.98	20.15	0.38	0.44	1.16	1.1356	46.5475	2	2	2	0	0	0	0	0	0	0	0	0	0	0	0	0	0	0	0	0	0	0	0	0	0	0	0	0	0	0	0
1676	116694	0.862	27.77	32.23	0.707	3.27	4.63	0.748	8.02	10.73	0.977	16.48	16.87	0.553	0.65	1.17	1.1395	50.7157	2	1	2	0	1	0	0	0	0	0	0	0	0	0	0	12	1	0	0	0	0	0	0	0	0	0	0	0	0	0	0
1677	116699	1.194	41.72	34.95	1.112	5.09	4.58	0.874	11.55	13.21	1.461	25.07	17.16	1.016	1.16	1.14	1.1384	49.3566	2	2	2	0	0	0	0	0	0	0	0	0	0	0	0	0	0	0	0	0	0	0	0	0	0	0	0	0	0	0	0
1678	116707	0.999	33.13	33.15	0.741	3.31	4.47	0.797	10.16	12.75	1.234	19.66	15.93	0.59	0.78	1.32	1.1441	44.6999	2	2	2	0	0	0	0	0	0	0	0	0	0	0	0	0	0	0	0	0	0	0	0	0	0	0	0	0	0	0	0
1679	116709	0.794	33.93	42.75	0.719	4.12	5.74	0.617	8.67	14.05	0.921	21.14	22.96	0.499	0.52	1.04	1.14	50.6426	2	2	2	0	0	0	0	0	0	0	0	0	0	0	0	0	0	0	0	0	0	0	0	0	0	0	0	0	0	0	0
1680	116710	1.08	46.52	43.07	0.851	4.78	5.62	0.795	10.28	12.94	1.283	31.46	24.51	0.617	0.69	1.12	1.1241	44.5741	2	2	2	0	0	0	0	0	0	0	0	0	0	0	0	0	0	0	0	0	0	0	0	0	0	0	0	0	0	0	0
1681	116728	0.868	29.58	34.08	0.661	3.27	4.94	0.654	6.69	10.22	1.037	19.62	18.91	0.641	0.83	1.3	1.1566	46.9621	2	2	2	0	0	0	0	0	0	0	0	0	0	0	0	0	0	0	0	0	0	0	0	0	0	0	0	0	0	0	0
1682	116730	0.703	25.33	36.05	0.538	2.99	5.56	0.496	6.69	13.49	0.92	15.65	17	0.242	0.27	1.12	1.157	45.9282	2	2	1	0	0	2	0	0	0	0	0	0	0	0	0	0	0	0	0	0	0	0	0	0	0	0	0	0	0	0	0
1683	116734	1.025	31.67	30.91	0.821	3.88	4.73	0.763	7.23	9.47	1.23	20.56	16.71	0.686	0.9	1.32	1.1454	43.7135	2	2	2	0	0	0	0	0	0	0	0	0	0	0	0	0	0	0	0	0	0	0	0	0	0	0	0	0	0	0	0
1684	116739	0.864	26.26	30.4	0.668	3.12	4.67	0.705	6.83	9.69	1.017	16.31	16.04	0.466	0.52	1.11	1.1462	52.1611	2	2	2	0	0	0	0	0	0	0	0	0	0	0	0	0	0	0	0	0	0	0	0	0	0	0	0	0	0	0	0
1685	116746	0.935	32.14	34.38	0.748	3.73	4.99	0.69	7.99	11.58	1.147	20.42	17.81	0.54	0.62	1.16	1.1524	46.1926	2	2	2	0	0	0	0	0	0	0	0	0	0	0	0	0	0	0	0	0	0	0	0	0	0	0	0	0	0	0	0
1686	116747	0.816	25.55	31.32	0.674	3.08	4.57	0.591	6.2	10.49	1.001	16.26	16.25	0.529	0.55	1.04	1.1385	54.0182	2	2	2	0	0	0	0	0	0	0	0	0	0	0	0	0	0	0	0	0	0	0	0	0	0	0	0	0	0	0	0
1687	116757	1.038	46.41	44.7	0.836	4.27	5.11	0.804	8.14	10.12	1.154	34	29.47	0.736	0.95	1.3	1.1278	42.7997	2	2	2	0	0	0	0	0	0	0	0	0	0	0	0	0	0	0	0	0	0	0	0	0	0	0	0	0	0	0	0
1688	116760	0.934	28.64	30.67	0.792	3.58	4.52	0.665	6.79	10.21	1.146	18.27	15.94	0.519	0.6	1.15	1.159	47.2544	2	2	2	0	0	0	0	0	0	0	0	0	0	0	0	0	0	0	0	0	0	0	0	0	0	0	0	0	0	0	0
1689	116762	1.242	42.5	34.23	1.077	5.61	5.21	0.917	9.98	10.89	1.484	26.91	18.13	0.744	0.89	1.19	1.1473	41.295	2	2	2	0	0	0	0	0	0	0	0	0	0	0	0	0	0	0	0	0	0	0	0	0	0	0	0	0	0	0	0
1690	116764	0.826	32.54	39.41	0.76	3.71	4.88	0.628	7.92	12.61	0.954	20.91	21.93	0.713	0.93	1.31	1.1303	48.3493	2	2	2	0	0	0	0	0	0	0	0	0	0	0	0	0	0	0	0	0	0	0	0	0	0	0	0	0	0	0	0
1691	116766	0.862	27.99	32.49	0.729	3.69	5.06	0.634	8.17	12.88	1.109	16.14	14.55	0.493	0.51	1.04	1.1379	48.0095	2	2	2	0	0	0	0	0	0	0	0	0	0	0	0	0	0	0	0	0	0	0	0	0	0	0	0	0	0	0	0
1692	116770	1.178	37.1	31.49	0.814	3.7	4.54	0.964	11.17	11.59	1.448	22.24	15.36	0.821	1.06	1.3	1.1622	44.4099	2	2	2	0	0	0	0	0	0	0	0	0	0	0	0	0	0	0	0	0	0	0	0	0	0	0	0	0	0	0	0
1693	116776	1.068	48.34	45.27	0.851	4.6	5.4	0.762	11.96	15.7	1.315	31.78	24.17	0.825	0.86	1.04	1.1294	46.3086	2	2	2	0	0	0	0	0	0	0	0	0	0	0	0	0	0	0	0	0	0	0	0	0	0	0	0	0	0	0	0
1694	116780	0.947	37.16	39.22	0.824	4.36	5.3	0.698	8.38	12.01	1.114	24.42	21.91	0.604	0.7	1.16	1.1308	47.2357	2	2	2	0	0	0	0	0	0	0	0	0	0	0	0	0	0	0	0	0	0	0	0	0	0	0	0	0	0	0	0
1695	116783	0.848	32.35	38.15	0.748	3.88	5.19	0.634	8.22	12.97	1.012	20.25	20	0.61	0.79	1.3	1.1448	51.0046	2	2	2	0	0	0	0	0	0	0	0	0	0	0	0	0	0	0	0	0	0	0	0	0	0	0	0	0	0	0	0
1696	116784	1.052	46.18	43.9	0.866	4.91	5.67	0.75	9.67	12.9	1.247	31.6	25.34	0.685	0.8	1.17	1.1482	44.8738	2	2	2	0	0	0	0	0	0	0	0	0	0	0	0	0	0	0	0	0	0	0	0	0	0	0	0	0	0	0	0
1697	116786	0.997	40.87	41.01	0.906	4.59	5.07	0.778	9.1	11.7	1.121	27.19	24.25	0.656	0.76	1.16	1.1411	44.1212	2	2	2	0	0	0	0	0	0	0	0	0	0	0	0	0	0	0	0	0	0	0	0	0	0	0	0	0	0	0	0
1698	116793	0.791	25.5	32.25	0.705	3.56	5.05	0.576	6.3	10.94	0.962	15.65	16.26	0.658	0.68	1.04	1.1598	45.3698	2	2	2	0	0	0	0	0	0	0	0	0	0	0	0	0	0	0	0	0	0	0	0	0	0	0	0	0	0	0	0
1699	116794	1.231	55.36	44.96	0.937	5.5	5.87	0.93	13.22	14.21	1.473	36.64	24.88	0.88	1.03	1.17	1.1298	46.7167	2	2	2	0	0	0	0	0	0	0	0	0	0	0	0	0	0	0	0	0	0	0	0	0	0	0	0	0	0	0	0
1700	116802	0.578	19.8	34.24	0.422	2.13	5.05	0.503	3.79	7.54	0.641	13.87	21.65	0.3	0.39	1.3	1.1428	55.9401	2	2	2	0	0	0	0	0	0	0	0	0	0	0	0	0	0	0	0	0	0	0	0	0	0	0	0	0	0	0	0
1701	116807	0.821	30.9	37.63	0.763	3.76	4.92	0.598	7.35	12.29	0.969	19.79	20.42	0.503	0.57	1.13	1.1384	50.523	2	2	2	0	0	0	0	0	0	0	0	0	0	0	0	0	0	0	0	0	0	0	0	0	0	0	0	0	0	0	0
1702	116809	0.616	27.95	45.39	0.485	2.78	5.73	0.395	6.13	15.52	0.789	19.04	24.15	0.199	0.23	1.16	1.1314	47.1537	2	2	2	0	0	0	0	0	0	0	0	0	0	0	0	0	0	0	0	0	0	0	0	0	0	0	0	0	0	0	0
1703	116816	0.996	34.54	34.68	0.823	4.4	5.35	0.804	9.18	11.42	1.17	20.97	17.92	0.505	0.59	1.18	1.1525	45.7202	2	1	2	0	1	0	0	0	0	0	0	0	0	0	0	75	2	1	0	0	0	0	0	0	0	0	0	0	0	0	0
1704	116819	1.067	41.27	38.69	0.886	5	5.64	0.792	9.46	11.95	1.271	26.81	21.1	0.604	0.7	1.16	1.135	49.1014	2	1	2	0	2	0	0	0	0	0	0	0	0	0	0	13	1	0	22	1	0	0	0	0	0	0	0	0	0	0	0
1705	116823	0.652	20.51	31.48	0.451	2.17	4.8	0.43	4.51	10.49	0.855	13.83	16.18	0.269	0.29	1.08	1.1397	52.2194	2	2	2	0	0	0	0	0	0	0	0	0	0	0	0	0	0	0	0	0	0	0	0	0	0	0	0	0	0	0	0
1706	116831	0.89	28.18	31.65	0.768	3.49	4.54	0.665	6.36	9.57	1.045	18.33	17.54	0.508	0.59	1.17	1.1557	47.7267	2	2	2	0	0	0	0	0	0	0	0	0	0	0	0	0	0	0	0	0	0	0	0	0	0	0	0	0	0	0	0
1707	116846	1.06	42.86	40.43	0.926	5.2	5.61	0.777	11.82	15.21	1.318	25.85	19.61	0.732	0.85	1.15	1.1318	47.7135	2	2	2	0	0	0	0	0	0	0	0	0	0	0	0	0	0	0	0	0	0	0	0	0	0	0	0	0	0	0	0
1708	116857	0.887	26.92	30.34	0.685	3.21	4.68	0.757	8.3	10.97	1.049	15.41	14.69	0.528	0.55	1.04	1.1399	53.6543	2	2	2	0	0	0	0	0	0	0	0	0	0	0	0	0	0	0	0	0	0	0	0	0	0	0	0	0	0	0	0
1709	116858	1.011	42.98	42.5	0.868	4.83	5.56	0.764	9.48	12.41	1.169	28.67	24.53	0.656	0.76	1.16	1.1475	52.5173	2	2	2	0	0	0	0	0	0	0	0	0	0	0	0	0	0	0	0	0	0	0	0	0	0	0	0	0	0	0	0
1710	116864	1.065	36.68	34.45	0.897	4.38	4.88	0.724	7.62	10.53	1.297	24.67	19.03	0.735	0.95	1.3	1.1254	44.2487	2	2	2	0	0	0	0	0	0	0	0	0	0	0	0	0	0	0	0	0	0	0	0	0	0	0	0	0	0	0	0
1711	116866	0.422	15.78	37.4	0.411	2.21	5.38	0.305	3.02	9.91	0.477	10.54	22.11	0.21	0.25	1.2	1.1442	51.7435	2	1	2	0	2	0	0	0	0	0	0	0	0	0	0	40	1	0	43	1	0	0	0	0	0	0	0	0	0	0	0
1712	116869	0.759	26.53	34.95	0.64	3.18	4.97	0.603	6.83	11.32	0.886	16.52	18.65	0.37	0.42	1.12	1.1344	53.1138	2	2	2	0	0	0	0	0	0	0	0	0	0	0	0	0	0	0	0	0	0	0	0	0	0	0	0	0	0	0	0
1713	116871	0.888	30.28	34.09	0.828	4.27	5.15	0.565	8.33	14.76	1.248	17.69	14.18	0.677	0.88	1.3	1.1463	51.7044	2	2	2	0	0	0	0	0	0	0	0	0	0	0	0	0	0	0	0	0	0	0	0	0	0	0	0	0	0	0	0
1714	116881	0.851	34.81	40.91	0.684	3.77	5.5	0.628	7.68	12.23	1.008	23.36	23.17	0.497	0.6	1.22	1.1522	46.9051	2	2	2	0	0	0	0	0	0	0	0	0	0	0	0	0	0	0	0	0	0	0	0	0	0	0	0	0	0	0	0
1715	116888	0.74	19.13	25.86	0.653	2.71	4.15	0.572	4.63	8.1	0.867	11.79	13.61	0.463	0.55	1.19	1.1581	48.5381	2	2	2	0	0	0	0	0	0	0	0	0	0	0	0	0	0	0	0	0	0	0	0	0	0	0	0	0	0	0	0
1716	116896	1.064	28.12	26.44	0.856	3.41	3.99	0.837	6.67	7.96	1.245	18.04	14.49	0.81	0.84	1.04	1.1388	53.3778	2	2	2	0	0	0	0	0	0	0	0	0	0	0	0	0	0	0	0	0	0	0	0	0	0	0	0	0	0	0	0
1717	116898	0.97	33.94	35	0.838	3.99	4.76	0.781	9.87	12.63	1.141	20.09	17.61	0.902	1.19	1.32	1.1481	45.2063	2	2	2	0	0	0	0	0	0	0	0	0	0	0	0	0	0	0	0	0	0	0	0	0	0	0	0	0	0	0	0
1718	116900	0.868	37.21	42.87	0.791	4.38	5.54	0.723	8.27	11.44	0.949	24.56	25.89	0.614	0.79	1.29	1.1291	47.1938	2	2	2	0	0	0	0	0	0	0	0	0	0	0	0	0	0	0	0	0	0	0	0	0	0	0	0	0	0	0	0
1719	116901	0.965	36.35	37.68	0.916	4.41	4.82	0.604	6.61	10.94	1.155	25.33	21.93	0.771	0.8	1.04	1.1427	53.6983	2	2	2	0	0	0	0	0	0	0	0	0	0	0	0	0	0	0	0	0	0	0	0	0	0	0	0	0	0	0	0
1720	116904	1.051	38.59	36.73	0.927	4.58	4.95	0.819	10.09	12.32	1.229	23.92	19.46	0.69	0.81	1.18	1.1347	43.2328	2	2	2	0	0	0	0	0	0	0	0	0	0	0	0	0	0	0	0	0	0	0	0	0	0	0	0	0	0	0	0
1721	116906	1.058	36.42	34.44	0.858	3.29	3.84	0.744	7.38	9.93	1.246	25.75	20.67	0.585	0.64	1.09	1.1522	41.9278	2	2	2	0	0	0	0	0	0	0	0	0	0	0	0	0	0	0	0	0	0	0	0	0	0	0	0	0	0	0	0
1722	116907	1.147	48.09	41.91	0.87	4.7	5.4	0.858	11.04	12.86	1.368	32.36	23.65	0.539	0.6	1.12	1.1544	46.6146	2	2	2	0	0	0	0	0	0	0	0	0	0	0	0	0	0	0	0	0	0	0	0	0	0	0	0	0	0	0	0
1723	116911	1.146	48.51	42.31	1.008	6.2	6.15	0.93	12.51	13.46	1.313	29.8	22.71	0.708	0.8	1.13	1.1396	42.2489	2	2	2	0	0	0	0	0	0	0	0	0	0	0	0	0	0	0	0	0	0	0	0	0	0	0	0	0	0	0	0
1724	116915	0.959	31.78	33.15	0.932	4.57	4.91	0.684	7.01	10.25	1.123	20.19	17.99	0.609	0.67	1.1	1.1372	51.1702	2	2	2	0	0	0	0	0	0	0	0	0	0	0	0	0	0	0	0	0	0	0	0	0	0	0	0	0	0	0	0
1725	116917	0.813	28.32	34.83	0.592	3.03	5.13	0.594	7.11	11.97	1.025	18.18	17.74	0.351	0.41	1.16	1.1591	46.6942	2	2	2	0	0	0	0	0	0	0	0	0	0	0	0	0	0	0	0	0	0	0	0	0	0	0	0	0	0	0	0
1726	116920	0.841	27.99	33.27	0.663	3.38	5.09	0.665	6.62	9.95	0.987	18	18.23	0.42	0.49	1.16	1.1295	49.1688	2	1	2	0	1	0	0	0	0	0	0	0	0	0	0	30	1	0	0	0	0	0	0	0	0	0	0	0	0	0	0
1727	116923	0.854	26	30.43	0.688	3.49	5.08	0.652	6.23	9.57	1.031	16.28	15.79	0.551	0.71	1.3	1.1557	46.1216	2	2	2	0	0	0	0	0	0	0	0	0	0	0	0	0	0	0	0	0	0	0	0	0	0	0	0	0	0	0	0
1728	116928	1.197	49.53	41.37	0.961	5.55	5.78	0.83	9.36	11.28	1.424	34.62	24.31	0.695	0.8	1.16	1.1486	44.094	2	2	2	0	0	0	0	0	0	0	0	0	0	0	0	0	0	0	0	0	0	0	0	0	0	0	0	0	0	0	0
1729	116929	0.953	34.79	36.51	0.851	4.31	5.07	0.62	7.04	11.36	1.167	23.43	20.08	0.731	0.95	1.3	1.1372	49.8441	2	2	2	0	0	0	0	0	0	0	0	0	0	0	0	0	0	0	0	0	0	0	0	0	0	0	0	0	0	0	0
1730	116943	0.812	27.26	33.56	0.663	3.21	4.84	0.597	5.68	9.51	0.957	18.37	19.21	0.503	0.65	1.3	1.1537	45.7174	2	2	2	0	0	0	0	0	0	0	0	0	0	0	0	0	0	0	0	0	0	0	0	0	0	0	0	0	0	0	0
1731	116952	0.738	25.74	34.88	0.687	3.43	4.99	0.501	5.31	10.6	0.881	17	19.29	0.515	0.59	1.14	1.163	46.9902	2	2	1	0	0	2	0	0	0	0	0	0	0	0	0	0	0	0	0	0	0	0	0	0	0	0	0	0	0	0	0
1732	116955	0.788	46.68	59.26	0.73	4.56	6.25	0.646	11.62	17.98	0.871	30.49	35.02	0.508	0.58	1.14	1.1417	50.8522	2	2	1	0	0	3	0	0	0	0	0	0	0	0	0	0	0	0	0	0	0	0	0	0	0	0	0	0	0	0	0
1733	116956	0.977	29.1	29.79	0.772	3.73	4.84	0.82	7.08	8.63	1.121	18.29	16.32	0.693	0.9	1.31	1.1392	50.6541	2	2	2	0	0	0	0	0	0	0	0	0	0	0	0	0	0	0	0	0	0	0	0	0	0	0	0	0	0	0	0
1734	116959	1.149	50.23	43.7	0.992	5.09	5.14	0.848	12.56	14.82	1.372	32.57	23.74	0.558	0.63	1.13	1.1422	42.2506	2	2	2	0	0	0	0	0	0	0	0	0	0	0	0	0	0	0	0	0	0	0	0	0	0	0	0	0	0	0	0
1735	116961	1.016	48.31	47.55	0.819	4.17	5.09	0.767	11.91	15.52	1.197	32.23	26.94	0.488	0.54	1.11	1.1417	49.0017	2	2	2	0	0	0	0	0	0	0	0	0	0	0	0	0	0	0	0	0	0	0	0	0	0	0	0	0	0	0	0
1736	116966	0.895	32.26	36.03	0.731	3.81	5.21	0.635	7.88	12.4	1.117	20.57	18.42	0.652	0.85	1.3	1.1327	46.2365	2	2	2	0	0	0	0	0	0	0	0	0	0	0	0	0	0	0	0	0	0	0	0	0	0	0	0	0	0	0	0
1737	116968	0.63	28.16	44.66	0.524	3.06	5.84	0.482	8.94	18.55	0.797	16.16	20.27	0.202	0.25	1.22	1.1543	46.6881	2	2	2	0	0	0	0	0	0	0	0	0	0	0	0	0	0	0	0	0	0	0	0	0	0	0	0	0	0	0	0
1738	116978	1.043	43.08	41.32	0.783	4.57	5.83	0.801	11.29	14.1	1.273	27.22	21.38	0.512	0.59	1.15	1.1428	43.4632	2	2	2	0	0	0	0	0	0	0	0	0	0	0	0	0	0	0	0	0	0	0	0	0	0	0	0	0	0	0	0
1739	116980	0.615	20.91	34.01	0.506	2.75	5.45	0.499	4.86	9.73	0.706	13.3	18.84	0.288	0.33	1.16	1.1401	50.3879	2	2	2	0	0	0	0	0	0	0	0	0	0	0	0	0	0	0	0	0	0	0	0	0	0	0	0	0	0	0	0
1740	116984	1.15	48.27	41.98	1.136	5.82	5.12	0.826	9.72	11.76	1.304	32.73	25.09	1.057	1.38	1.3	1.1288	48.0795	2	2	2	0	0	0	0	0	0	0	0	0	0	0	0	0	0	0	0	0	0	0	0	0	0	0	0	0	0	0	0
1741	116989	0.914	37.08	40.58	0.7	4.04	5.78	0.704	8.49	12.05	1.079	24.55	22.75	0.652	0.85	1.31	1.1486	45.9026	2	2	2	0	0	0	0	0	0	0	0	0	0	0	0	0	0	0	0	0	0	0	0	0	0	0	0	0	0	0	0
1742	116991	1.21	58.55	48.38	0.992	6	6.05	0.87	14.89	17.12	1.493	37.66	25.22	0.834	0.96	1.16	1.1539	45.354	2	2	2	0	0	0	0	0	0	0	0	0	0	0	0	0	0	0	0	0	0	0	0	0	0	0	0	0	0	0	0
1743	116994	0.917	39.39	42.98	0.769	4.16	5.42	0.655	9.82	15	1.126	25.41	22.57	0.49	0.54	1.1	1.144	49.5685	2	2	2	0	0	0	0	0	0	0	0	0	0	0	0	0	0	0	0	0	0	0	0	0	0	0	0	0	0	0	0
1744	116997	0.945	37.68	39.89	0.7	4.04	5.77	0.803	10.33	12.86	1.097	23.32	21.26	0.413	0.48	1.16	1.1333	51.0681	2	2	2	0	0	0	0	0	0	0	0	0	0	0	0	0	0	0	0	0	0	0	0	0	0	0	0	0	0	0	0
1745	117000	0.82	29.32	35.78	0.596	2.77	4.64	0.583	6.97	11.94	1.021	19.59	19.2	0.647	0.77	1.2	1.1582	48.2704	2	2	2	0	0	0	0	0	0	0	0	0	0	0	0	0	0	0	0	0	0	0	0	0	0	0	0	0	0	0	0
1746	117006	1.057	28.54	27	0.824	3.38	4.1	0.804	6.15	7.65	1.246	19.01	15.26	0.785	1.03	1.32	1.1444	40.2609	2	2	2	0	0	0	0	0	0	0	0	0	0	0	0	0	0	0	0	0	0	0	0	0	0	0	0	0	0	0	0
1747	117010	0.82	26.31	32.11	0.625	2.77	4.43	0.599	5.91	9.87	0.99	17.63	17.81	0.455	0.6	1.32	1.1421	44.2458	2	2	2	0	0	0	0	0	0	0	0	0	0	0	0	0	0	0	0	0	0	0	0	0	0	0	0	0	0	0	0
1748	117011	0.863	24.69	28.62	0.673	2.83	4.2	0.655	5.17	7.89	1.01	16.69	16.52	0.421	0.49	1.17	1.137	50.6909	2	2	2	0	0	0	0	0	0	0	0	0	0	0	0	0	0	0	0	0	0	0	0	0	0	0	0	0	0	0	0
1749	117013	0.749	26.41	35.29	0.652	3.13	4.79	0.509	6.81	13.38	0.963	16.48	17.12	0.429	0.5	1.16	1.157	48.5045	2	2	1	0	0	1	0	0	0	0	0	0	0	0	0	0	0	0	0	0	0	0	0	0	0	0	0	0	0	0	0
1750	117015	0.81	34.18	42.2	0.827	4.73	5.72	0.648	8.68	13.4	0.9	20.78	23.08	0.549	0.64	1.17	1.1374	47.9618	2	2	2	0	0	0	0	0	0	0	0	0	0	0	0	0	0	0	0	0	0	0	0	0	0	0	0	0	0	0	0
1751	117019	0.947	54.01	57.03	0.709	4.24	5.98	0.683	14.86	21.76	1.191	34.9	29.3	0.63	0.82	1.3	1.1508	42.8017	2	2	2	0	0	0	0	0	0	0	0	0	0	0	0	0	0	0	0	0	0	0	0	0	0	0	0	0	0	0	0
1752	117020	0.9	23.76	26.39	0.745	3.49	4.68	0.723	6	8.29	1.064	14.27	13.42	0.679	0.88	1.3	1.1366	49.3743	2	2	2	0	0	0	0	0	0	0	0	0	0	0	0	0	0	0	0	0	0	0	0	0	0	0	0	0	0	0	0
1753	117022	0.795	25.89	32.57	0.63	2.88	4.58	0.635	7.19	11.33	0.949	15.81	16.66	0.433	0.48	1.1	1.1362	50.823	2	1	2	0	3	0	0	0	0	0	0	0	0	0	0	8	1	0	9	1	0	10	1	0	0	0	0	0	0	0	0
1754	117028	0.765	25.74	33.65	0.624	3.41	5.47	0.532	6.25	11.76	0.979	16.07	16.41	0.348	0.39	1.13	1.1502	46.8792	2	1	2	0	1	0	0	0	0	0	0	0	0	0	0	58	2	2	0	0	0	0	0	0	0	0	0	0	0	0	0
1755	117031	0.933	37.03	39.67	0.691	3.97	5.74	0.703	8.45	12.02	1.124	24.62	21.91	0.464	0.53	1.13	1.1496	46.014	2	2	2	0	0	0	0	0	0	0	0	0	0	0	0	0	0	0	0	0	0	0	0	0	0	0	0	0	0	0	0
1756	117036	0.932	50.15	53.81	0.953	5.49	5.76	0.737	14.37	19.5	1.061	30.29	28.56	0.547	0.62	1.14	1.1321	47.1402	2	2	2	0	0	0	0	0	0	0	0	0	0	0	0	0	0	0	0	0	0	0	0	0	0	0	0	0	0	0	0
1757	117037	0.968	40.04	41.36	0.724	4.09	5.65	0.76	10.48	13.79	1.162	25.48	21.92	0.494	0.62	1.26	1.1605	46.7727	2	2	2	0	0	0	0	0	0	0	0	0	0	0	0	0	0	0	0	0	0	0	0	0	0	0	0	0	0	0	0
1758	117044	0.998	40.74	40.83	0.7	3.67	5.24	0.674	7.91	11.74	1.223	29.16	23.85	0.464	0.52	1.11	1.1407	51.55	2	1	2	0	1	0	0	0	0	0	0	0	0	0	0	70	2	2	0	0	0	0	0	0	0	0	0	0	0	0	0
1759	117045	1.179	46.12	39.12	0.98	5.48	5.58	0.84	11.86	14.13	1.483	28.78	19.41	0.76	0.89	1.17	1.1346	46.7048	2	2	2	0	0	0	0	0	0	0	0	0	0	0	0	0	0	0	0	0	0	0	0	0	0	0	0	0	0	0	0
1760	117046	0.976	33.23	34.06	0.911	4.91	5.39	0.675	8.55	12.67	1.236	19.77	16	0.686	0.77	1.12	1.1399	54.3036	2	2	2	0	0	0	0	0	0	0	0	0	0	0	0	0	0	0	0	0	0	0	0	0	0	0	0	0	0	0	0
1761	117052	0.79	36.08	45.64	0.671	4.47	6.65	0.58	8.58	14.8	0.952	23.03	24.19	0.487	0.57	1.17	1.1339	49.6738	2	2	2	0	0	0	0	0	0	0	0	0	0	0	0	0	0	0	0	0	0	0	0	0	0	0	0	0	0	0	0
1762	117058	0.893	29.83	33.39	0.8	3.82	4.78	0.675	7.05	10.45	1.044	18.96	18.16	0.568	0.66	1.17	1.1334	48.7039	2	2	2	0	0	0	0	0	0	0	0	0	0	0	0	0	0	0	0	0	0	0	0	0	0	0	0	0	0	0	0
1763	117064	0.924	30.57	33.09	0.782	3.78	4.83	0.646	6.13	9.49	1.101	20.67	18.77	0.706	0.92	1.3	1.1286	44.5872	2	1	2	0	1	0	0	0	0	0	0	0	0	0	0	51	2	1	0	0	0	0	0	0	0	0	0	0	0	0	0
1764	117067	0.914	34.11	37.31	0.83	4.32	5.2	0.722	6.85	9.48	1.014	22.94	22.63	0.698	0.9	1.29	1.1388	48.5167	2	2	2	0	0	0	0	0	0	0	0	0	0	0	0	0	0	0	0	0	0	0	0	0	0	0	0	0	0	0	0
1765	117090	0.734	27.82	37.88	0.655	3.38	5.16	0.54	7.74	14.33	0.908	16.71	18.39	0.429	0.56	1.32	1.1501	44.4626	2	2	1	0	0	1	0	0	0	0	0	0	0	0	0	0	0	0	0	0	0	0	0	0	0	0	0	0	0	0	0
1766	117091	0.904	41.64	46.08	0.836	4.59	5.48	0.584	8.82	15.09	1.107	28.24	25.5	0.508	0.57	1.12	1.136	46.8339	2	2	2	0	0	0	0	0	0	0	0	0	0	0	0	0	0	0	0	0	0	0	0	0	0	0	0	0	0	0	0
1767	117092	0.849	23.87	28.12	0.676	3.04	4.49	0.697	6.01	8.62	0.988	14.82	15.01	0.475	0.55	1.16	1.1374	48.1472	2	2	2	0	0	0	0	0	0	0	0	0	0	0	0	0	0	0	0	0	0	0	0	0	0	0	0	0	0	0	0
1768	117107	0.981	48.27	49.2	0.871	5.34	6.14	0.658	9.72	14.77	1.174	33.21	28.29	0.464	0.48	1.04	1.1383	52.6898	2	2	2	0	0	0	0	0	0	0	0	0	0	0	0	0	0	0	0	0	0	0	0	0	0	0	0	0	0	0	0
1769	117108	0.872	32.97	37.81	0.753	3.51	4.66	0.653	7.1	10.88	1.004	22.36	22.27	0.536	0.61	1.14	1.1318	49.4711	2	1	2	0	1	0	0	0	0	0	0	0	0	0	0	23	1	0	0	0	0	0	0	0	0	0	0	0	0	0	0
1770	117117	1.019	34.59	33.94	0.935	4.47	4.78	0.835	8.65	10.36	1.142	21.47	18.81	0.644	0.76	1.17	1.1337	49.3451	2	2	2	0	0	0	0	0	0	0	0	0	0	0	0	0	0	0	0	0	0	0	0	0	0	0	0	0	0	0	0
1771	117120	1.212	54.49	44.95	0.956	5.6	5.86	0.87	11.92	13.7	1.456	36.97	25.39	0.812	0.95	1.17	1.1431	42.9187	2	2	2	0	0	0	0	0	0	0	0	0	0	0	0	0	0	0	0	0	0	0	0	0	0	0	0	0	0	0	0
1772	117130	0.741	21.55	29.08	0.613	2.82	4.6	0.65	5.54	8.52	0.826	13.18	15.96	0.428	0.49	1.16	1.1586	48.4382	2	1	2	0	1	0	0	0	0	0	0	0	0	0	0	43	1	0	0	0	0	0	0	0	0	0	0	0	0	0	0
1773	117131	0.862	28.45	33.01	0.767	3.84	5	0.644	6.86	10.66	1.023	17.75	17.35	0.681	0.89	1.3	1.1382	52.828	2	2	2	0	0	0	0	0	0	0	0	0	0	0	0	0	0	0	0	0	0	0	0	0	0	0	0	0	0	0	0
1774	117132	0.861	26.65	30.95	0.721	3.4	4.71	0.678	6.08	8.96	0.994	17.17	17.28	0.552	0.63	1.15	1.1545	47.0572	2	2	2	0	0	0	0	0	0	0	0	0	0	0	0	0	0	0	0	0	0	0	0	0	0	0	0	0	0	0	0
1775	117133	0.743	21.99	29.61	0.626	2.69	4.3	0.607	6.18	10.17	0.867	13.13	15.14	0.413	0.49	1.18	1.1511	46.4595	2	2	2	0	0	0	0	0	0	0	0	0	0	0	0	0	0	0	0	0	0	0	0	0	0	0	0	0	0	0	0
1776	117134	0.762	33.19	43.58	0.596	3.41	5.72	0.537	7.96	14.81	0.947	21.83	23.05	0.287	0.32	1.11	1.1396	53.7644	2	2	2	0	0	0	0	0	0	0	0	0	0	0	0	0	0	0	0	0	0	0	0	0	0	0	0	0	0	0	0
1777	117136	0.821	27.92	34.01	0.651	3.02	4.64	0.638	7.64	11.97	0.992	17.27	17.4	0.461	0.54	1.17	1.1434	46.0191	2	2	2	0	0	0	0	0	0	0	0	0	0	0	0	0	0	0	0	0	0	0	0	0	0	0	0	0	0	0	0
1778	117150	0.709	30.52	43.05	0.586	3.49	5.95	0.492	6.09	12.37	0.847	20.94	24.73	0.264	0.31	1.16	1.1331	49.576	2	2	2	0	0	0	0	0	0	0	0	0	0	0	0	0	0	0	0	0	0	0	0	0	0	0	0	0	0	0	0
1779	117158	0.88	24.69	28.05	0.871	3.57	4.1	0.66	6.44	9.76	1.034	14.68	14.2	0.726	0.96	1.32	1.1472	43.8614	2	2	2	0	0	0	0	0	0	0	0	0	0	0	0	0	0	0	0	0	0	0	0	0	0	0	0	0	0	0	0
1780	117161	0.897	30.55	34.06	0.755	3.76	4.97	0.725	7.22	9.96	1.023	19.57	19.13	0.684	0.89	1.3	1.1569	49.6009	2	2	2	0	0	0	0	0	0	0	0	0	0	0	0	0	0	0	0	0	0	0	0	0	0	0	0	0	0	0	0
1781	117165	1.079	53.29	49.39	0.782	4.52	5.79	0.787	12.14	15.43	1.3	36.63	28.18	0.504	0.58	1.16	1.1277	44.946	2	2	2	0	0	0	0	0	0	0	0	0	0	0	0	0	0	0	0	0	0	0	0	0	0	0	0	0	0	0	0
1782	117166	0.906	38.9	42.93	0.75	4.63	6.18	0.635	8.98	14.14	1.118	25.29	22.61	0.565	0.62	1.1	1.1608	45.4926	2	9	2	0	0	0	0	0	0	0	0	0	0	0	0	0	0	0	0	0	0	0	0	0	0	0	0	0	0	0	0
1783	117173	0.889	43.56	48.97	0.717	4.3	6	0.638	10.7	16.78	1.09	28.56	26.2	0.389	0.45	1.16	1.1321	48.4479	2	2	2	0	0	0	0	0	0	0	0	0	0	0	0	0	0	0	0	0	0	0	0	0	0	0	0	0	0	0	0
1784	117187	0.874	30.82	35.25	0.679	3.47	5.11	0.66	6.8	10.3	1.036	20.55	19.83	0.411	0.48	1.17	1.1381	49.7572	2	1	2	0	1	0	0	0	0	0	0	0	0	0	0	15	1	0	0	0	0	0	0	0	0	0	0	0	0	0	0
1785	117188	0.951	40.3	42.38	0.844	4.39	5.19	0.694	9.92	14.3	1.136	26	22.89	0.717	0.93	1.3	1.138	53.8619	2	2	2	0	0	0	0	0	0	0	0	0	0	0	0	0	0	0	0	0	0	0	0	0	0	0	0	0	0	0	0
1786	117192	1.09	43.87	40.25	0.878	5.09	5.8	0.828	10.68	12.91	1.305	28.1	21.54	0.602	0.68	1.12	1.1432	43.045	2	2	2	0	0	0	0	0	0	0	0	0	0	0	0	0	0	0	0	0	0	0	0	0	0	0	0	0	0	0	0
1787	117204	0.886	34.74	39.23	0.802	4.37	5.44	0.597	7.47	12.52	1.077	22.9	21.27	0.52	0.61	1.17	1.1364	52.0233	2	2	2	0	0	0	0	0	0	0	0	0	0	0	0	0	0	0	0	0	0	0	0	0	0	0	0	0	0	0	0
1788	117210	0.594	19.43	32.73	0.438	2.11	4.82	0.407	4.1	10.07	0.741	13.22	17.84	0.208	0.24	1.16	1.1565	46.7292	2	2	2	0	0	0	0	0	0	0	0	0	0	0	0	0	0	0	0	0	0	0	0	0	0	0	0	0	0	0	0
1789	117211	0.745	25.2	33.82	0.601	3.23	5.38	0.564	5.73	10.16	0.889	16.24	18.28	0.426	0.44	1.04	1.1589	47.4638	2	2	2	0	0	0	0	0	0	0	0	0	0	0	0	0	0	0	0	0	0	0	0	0	0	0	0	0	0	0	0
1790	117217	0.677	27.88	41.18	0.504	2.97	5.89	0.522	7.14	13.68	0.823	17.78	21.61	0.337	0.39	1.16	1.137	48.7414	2	2	2	0	0	0	0	0	0	0	0	0	0	0	0	0	0	0	0	0	0	0	0	0	0	0	0	0	0	0	0
1791	117219	1.106	31.07	28.08	0.938	3.67	3.92	0.944	7.16	7.59	1.221	20.24	16.58	0.809	1.05	1.3	1.1405	50.8065	2	2	2	0	0	0	0	0	0	0	0	0	0	0	0	0	0	0	0	0	0	0	0	0	0	0	0	0	0	0	0
1792	117220	0.79	29.66	37.54	0.549	3.03	5.52	0.661	8.2	12.39	0.939	18.44	19.63	0.294	0.34	1.17	1.1332	49.4848	2	2	2	0	0	0	0	0	0	0	0	0	0	0	0	0	0	0	0	0	0	0	0	0	0	0	0	0	0	0	0
1793	117221	0.991	36.96	37.3	0.818	4.19	5.11	0.761	9.72	12.78	1.188	23.05	19.41	0.763	1	1.31	1.1338	49.2279	2	1	2	0	1	0	0	0	0	0	0	0	0	0	0	8	1	0	0	0	0	0	0	0	0	0	0	0	0	0	0
1794	117222	0.986	41.27	41.85	0.796	4.3	5.41	0.808	9.73	12.05	1.117	27.24	24.39	0.568	0.66	1.16	1.1387	52.0816	2	2	2	0	0	0	0	0	0	0	0	0	0	0	0	0	0	0	0	0	0	0	0	0	0	0	0	0	0	0	0
1795	117224	1.077	54.84	50.91	0.964	5.97	6.19	0.84	15.35	18.27	1.268	33.52	26.44	0.687	0.79	1.16	1.1434	47.1546	2	2	2	0	0	0	0	0	0	0	0	0	0	0	0	0	0	0	0	0	0	0	0	0	0	0	0	0	0	0	0
1796	117226	0.865	27.13	31.37	0.731	3.23	4.42	0.641	6.44	10.05	1.033	17.45	16.9	0.576	0.64	1.12	1.1381	49.5267	2	2	2	0	0	0	0	0	0	0	0	0	0	0	0	0	0	0	0	0	0	0	0	0	0	0	0	0	0	0	0
1797	117234	0.786	38.97	49.6	0.626	3.69	5.89	0.584	8.59	14.73	0.921	26.69	28.98	0.403	0.47	1.17	1.1504	46.3888	2	2	2	0	0	0	0	0	0	0	0	0	0	0	0	0	0	0	0	0	0	0	0	0	0	0	0	0	0	0	0
1798	117235	0.858	23.1	26.92	0.723	3.06	4.24	0.709	5.47	7.72	0.973	14.56	14.96	0.568	0.66	1.15	1.1458	45.9263	2	2	2	0	0	0	0	0	0	0	0	0	0	0	0	0	0	0	0	0	0	0	0	0	0	0	0	0	0	0	0
1799	117238	1.101	45.02	40.9	1.094	6.08	5.56	0.75	8.5	11.34	1.268	30.44	24.01	0.918	1.19	1.3	1.1317	44.954	2	2	2	0	0	0	0	0	0	0	0	0	0	0	0	0	0	0	0	0	0	0	0	0	0	0	0	0	0	0	0
1800	117241	1.045	48.59	46.5	0.862	5.12	5.93	0.769	12.46	16.2	1.273	31.01	24.37	0.598	0.75	1.26	1.1408	41.6749	2	2	2	0	0	0	0	0	0	0	0	0	0	0	0	0	0	0	0	0	0	0	0	0	0	0	0	0	0	0	0
1801	117242	1.044	45.26	43.36	0.786	4.81	6.12	0.765	10.77	14.08	1.282	29.68	23.16	0.634	0.82	1.3	1.1307	46.5841	2	2	2	0	0	0	0	0	0	0	0	0	0	0	0	0	0	0	0	0	0	0	0	0	0	0	0	0	0	0	0
1802	117243	0.919	31.8	34.61	0.818	4.07	4.97	0.677	7.76	11.47	1.1	19.98	18.17	0.748	0.97	1.3	1.1523	48.1901	2	2	2	0	0	0	0	0	0	0	0	0	0	0	0	0	0	0	0	0	0	0	0	0	0	0	0	0	0	0	0
1803	117249	1.323	51.67	39.07	1.276	6.09	4.78	0.918	8.83	9.61	1.489	36.75	24.68	1.171	1.52	1.3	1.133	49.1009	2	2	2	0	0	0	0	0	0	0	0	0	0	0	0	0	0	0	0	0	0	0	0	0	0	0	0	0	0	0	0
1804	117250	0.871	30.51	35	0.67	3.23	4.82	0.664	8.04	12.11	1.065	19.24	18.07	0.655	0.68	1.04	1.1628	44.5097	2	2	2	0	0	0	0	0	0	0	0	0	0	0	0	0	0	0	0	0	0	0	0	0	0	0	0	0	0	0	0
1805	117251	1.126	47.25	41.95	0.969	5.46	5.64	0.827	10.17	12.31	1.317	31.61	24.01	0.896	1.16	1.3	1.1352	48.0631	2	2	2	0	0	0	0	0	0	0	0	0	0	0	0	0	0	0	0	0	0	0	0	0	0	0	0	0	0	0	0
1806	117263	1.041	45.55	43.76	0.998	5.18	5.19	0.79	10.57	13.38	1.183	29.8	25.19	0.618	0.77	1.24	1.1326	48.4754	2	2	2	0	0	0	0	0	0	0	0	0	0	0	0	0	0	0	0	0	0	0	0	0	0	0	0	0	0	0	0
1807	117265	1.213	44.25	36.48	0.996	4.48	4.49	1.002	12.29	12.27	1.394	27.49	19.72	0.81	0.99	1.23	1.1426	44.2737	2	2	2	0	0	0	0	0	0	0	0	0	0	0	0	0	0	0	0	0	0	0	0	0	0	0	0	0	0	0	0
1808	117266	0.554	18.6	33.58	0.449	2.35	5.24	0.421	4.75	11.28	0.674	11.5	17.06	0.313	0.41	1.3	1.1388	51.2138	1	2	2	1	0	0	65	2	1	0	0	0	0	0	0	0	0	0	0	0	0	0	0	0	0	0	0	0	0	0	0
1809	117273	0.753	24.81	32.94	0.658	3.09	4.69	0.628	6.24	9.93	0.845	15.48	18.31	0.457	0.52	1.14	1.1381	51.1367	2	2	2	0	0	0	0	0	0	0	0	0	0	0	0	0	0	0	0	0	0	0	0	0	0	0	0	0	0	0	0
1810	117275	0.938	35.04	37.36	0.764	4.02	5.27	0.727	8.91	12.25	1.115	22.11	19.84	0.517	0.61	1.18	1.1503	46.6729	2	2	2	0	0	0	0	0	0	0	0	0	0	0	0	0	0	0	0	0	0	0	0	0	0	0	0	0	0	0	0
1811	117280	1.001	27.71	27.69	0.914	4.12	4.51	0.792	7.12	8.99	1.162	16.47	14.18	0.851	1.1	1.3	1.1567	46.7195	2	2	2	0	0	0	0	0	0	0	0	0	0	0	0	0	0	0	0	0	0	0	0	0	0	0	0	0	0	0	0
1812	117283	1.067	39.71	37.22	0.977	4.81	4.92	0.785	10.47	13.34	1.289	24.43	18.95	0.78	0.82	1.05	1.149	44.7364	2	2	2	0	0	0	0	0	0	0	0	0	0	0	0	0	0	0	0	0	0	0	0	0	0	0	0	0	0	0	0
1813	117289	0.804	23.13	28.75	0.668	3.41	5.11	0.655	5.91	9.03	0.945	13.81	14.61	0.549	0.64	1.17	1.1503	44.1807	2	2	2	0	0	0	0	0	0	0	0	0	0	0	0	0	0	0	0	0	0	0	0	0	0	0	0	0	0	0	0
1814	117292	0.846	38.28	45.24	0.597	3.51	5.87	0.674	9.86	14.63	1.007	24.9	24.73	0.42	0.48	1.13	1.1589	49.8478	2	2	2	0	0	0	0	0	0	0	0	0	0	0	0	0	0	0	0	0	0	0	0	0	0	0	0	0	0	0	0
1815	117293	0.985	51.75	52.54	0.795	4.87	6.13	0.723	12.37	17.11	1.178	34.51	29.31	0.707	0.92	1.3	1.1556	43.8109	2	2	2	0	0	0	0	0	0	0	0	0	0	0	0	0	0	0	0	0	0	0	0	0	0	0	0	0	0	0	0
1816	117294	1.011	48.56	48.05	0.807	4.95	6.13	0.743	11.66	15.7	1.219	31.96	26.23	0.568	0.67	1.17	1.1452	46.2834	2	2	2	0	0	0	0	0	0	0	0	0	0	0	0	0	0	0	0	0	0	0	0	0	0	0	0	0	0	0	0
1817	117295	1.096	36.16	32.99	1.051	5.41	5.15	0.83	9.86	11.88	1.308	20.89	15.97	0.873	1.15	1.32	1.1407	43.0116	2	2	2	0	0	0	0	0	0	0	0	0	0	0	0	0	0	0	0	0	0	0	0	0	0	0	0	0	0	0	0
1818	117297	1.024	31.85	31.09	0.899	4.29	4.77	0.759	6.64	8.75	1.19	20.92	17.57	0.884	1.15	1.3	1.1325	48.9125	2	2	2	0	0	0	0	0	0	0	0	0	0	0	0	0	0	0	0	0	0	0	0	0	0	0	0	0	0	0	0
1819	117301	0.672	19.56	29.11	0.627	3.34	5.32	0.545	4.73	8.68	0.761	11.5	15.11	0.448	0.59	1.32	1.1556	45.8982	1	1	2	1	1	0	68	2	3	0	0	0	0	0	0	63	2	3	0	0	0	0	0	0	0	0	0	0	0	0	0
1820	117302	0.848	37.16	43.84	0.665	3.73	5.61	0.731	10.03	13.71	0.954	23.41	24.53	0.414	0.47	1.14	1.131	52.0208	2	2	2	0	0	0	0	0	0	0	0	0	0	0	0	0	0	0	0	0	0	0	0	0	0	0	0	0	0	0	0
1821	117307	0.807	25.73	31.88	0.604	2.92	4.83	0.605	6.02	9.96	0.982	16.79	17.09	0.408	0.46	1.12	1.1362	53.8807	2	2	2	0	0	0	0	0	0	0	0	0	0	0	0	0	0	0	0	0	0	0	0	0	0	0	0	0	0	0	0
1822	117310	1.2	53.8	44.85	0.945	5.61	5.93	0.937	13.76	14.69	1.422	34.44	24.23	0.694	0.81	1.17	1.1385	42.5134	2	2	2	0	0	0	0	0	0	0	0	0	0	0	0	0	0	0	0	0	0	0	0	0	0	0	0	0	0	0	0
1823	117312	0.936	28.35	30.3	0.795	3.38	4.25	0.671	6.55	9.75	1.13	18.43	16.3	0.639	0.66	1.04	1.1367	50.9072	2	2	2	0	0	0	0	0	0	0	0	0	0	0	0	0	0	0	0	0	0	0	0	0	0	0	0	0	0	0	0
1824	117314	1.123	40.53	36.09	0.953	4.99	5.24	0.816	9.95	12.19	1.371	25.59	18.66	0.769	0.87	1.14	1.1373	49.056	2	2	2	0	0	0	0	0	0	0	0	0	0	0	0	0	0	0	0	0	0	0	0	0	0	0	0	0	0	0	0
1825	117315	0.896	25.7	28.69	0.777	3.56	4.58	0.701	6.75	9.63	1.063	15.39	14.48	0.622	0.72	1.16	1.1382	50.8636	2	2	2	0	0	0	0	0	0	0	0	0	0	0	0	0	0	0	0	0	0	0	0	0	0	0	0	0	0	0	0
1826	117316	1.19	41.5	34.86	1.021	4.56	4.47	0.886	10.09	11.39	1.413	26.85	19.01	0.888	0.99	1.11	1.1307	47.8555	2	2	2	0	0	0	0	0	0	0	0	0	0	0	0	0	0	0	0	0	0	0	0	0	0	0	0	0	0	0	0
1827	117322	0.733	26.42	36.04	0.649	3.15	4.85	0.629	6.5	10.33	0.804	16.77	20.85	0.343	0.38	1.12	1.1589	47.1497	2	2	2	0	0	0	0	0	0	0	0	0	0	0	0	0	0	0	0	0	0	0	0	0	0	0	0	0	0	0	0
1828	117331	1.107	50.22	45.37	0.998	5.76	5.77	0.844	12.69	15.03	1.293	31.78	24.57	0.686	0.79	1.15	1.142	40.441	2	2	2	0	0	0	0	0	0	0	0	0	0	0	0	0	0	0	0	0	0	0	0	0	0	0	0	0	0	0	0
1829	117335	1.367	61.47	44.95	1.057	6.11	5.78	1.028	14.74	14.34	1.636	40.61	24.83	0.8	0.88	1.1	1.1288	48.0168	2	2	1	0	0	1	0	0	0	0	0	0	0	0	0	0	0	0	0	0	0	0	0	0	0	0	0	0	0	0	0
1830	117339	0.999	49.05	49.12	0.728	4.1	5.63	0.743	9.27	12.48	1.151	35.69	31.01	0.517	0.67	1.29	1.1361	50.4397	2	2	2	0	0	0	0	0	0	0	0	0	0	0	0	0	0	0	0	0	0	0	0	0	0	0	0	0	0	0	0
1831	117349	0.917	39.76	43.35	0.692	4.05	5.85	0.788	10.15	12.89	1.039	25.55	24.6	0.5	0.52	1.04	1.1626	50.3041	2	2	2	0	0	0	0	0	0	0	0	0	0	0	0	0	0	0	0	0	0	0	0	0	0	0	0	0	0	0	0
1832	117353	0.976	42.25	43.31	0.854	4.71	5.52	0.801	10.44	13.03	1.095	27.11	24.76	0.498	0.58	1.16	1.1407	49.3265	2	2	2	0	0	0	0	0	0	0	0	0	0	0	0	0	0	0	0	0	0	0	0	0	0	0	0	0	0	0	0
1833	117354	0.788	24.76	31.44	0.708	3.46	4.89	0.656	7.6	11.59	0.916	13.7	14.96	0.418	0.44	1.05	1.1493	46.6723	2	1	1	0	1	1	0	0	0	0	0	0	0	0	0	67	2	1	0	0	0	0	0	0	0	0	0	0	0	0	0
1834	117359	1.033	45.95	44.49	0.919	5.21	5.67	0.717	10.01	13.96	1.237	30.74	24.86	0.611	0.72	1.18	1.1409	41.2332	2	2	2	0	0	0	0	0	0	0	0	0	0	0	0	0	0	0	0	0	0	0	0	0	0	0	0	0	0	0	0
1835	117365	1.188	41.74	35.14	1.344	6.49	4.83	0.957	11.25	11.75	1.293	24	18.56	1.024	1.35	1.31	1.1312	46.992	2	2	2	0	0	0	0	0	0	0	0	0	0	0	0	0	0	0	0	0	0	0	0	0	0	0	0	0	0	0	0
1836	117370	0.887	36.38	41	0.693	4.3	6.2	0.685	10.44	15.25	1.107	21.64	19.55	0.555	0.57	1.04	1.1365	50.3663	2	2	2	0	0	0	0	0	0	0	0	0	0	0	0	0	0	0	0	0	0	0	0	0	0	0	0	0	0	0	0
1837	117374	0.611	17.54	28.69	0.457	2.14	4.68	0.443	4.47	10.08	0.785	10.94	13.93	0.344	0.41	1.18	1.1434	51.0875	2	1	2	0	1	0	0	0	0	0	0	0	0	0	0	56	2	2	0	0	0	0	0	0	0	0	0	0	0	0	0
1838	117395	0.717	20.29	28.31	0.55	2.53	4.61	0.548	4.73	8.64	0.865	13.03	15.06	0.322	0.37	1.16	1.1358	54.9524	2	2	2	0	0	0	0	0	0	0	0	0	0	0	0	0	0	0	0	0	0	0	0	0	0	0	0	0	0	0	0
1839	117397	1.116	42.35	37.95	0.91	4.84	5.32	0.834	10.08	12.08	1.335	27.43	20.55	0.714	0.85	1.19	1.1347	52.6411	2	2	2	0	0	0	0	0	0	0	0	0	0	0	0	0	0	0	0	0	0	0	0	0	0	0	0	0	0	0	0
1840	117400	0.839	40.49	48.24	0.661	4.06	6.15	0.684	10.99	16.06	0.978	25.44	26.02	0.402	0.46	1.16	1.1381	48.6709	2	2	2	0	0	0	0	0	0	0	0	0	0	0	0	0	0	0	0	0	0	0	0	0	0	0	0	0	0	0	0
1841	117402	0.981	32.81	33.47	0.756	3.57	4.72	0.801	9.39	11.73	1.167	19.85	17.01	0.559	0.65	1.16	1.1487	44.9448	2	2	2	0	0	0	0	0	0	0	0	0	0	0	0	0	0	0	0	0	0	0	0	0	0	0	0	0	0	0	0
1842	117411	1.059	47.32	44.66	0.872	5.36	6.15	0.846	11.1	13.12	1.215	30.86	25.4	0.686	0.89	1.3	1.1518	46.6215	2	2	2	0	0	0	0	0	0	0	0	0	0	0	0	0	0	0	0	0	0	0	0	0	0	0	0	0	0	0	0
1843	117414	0.87	30.43	34.98	0.722	3.89	5.39	0.712	7.93	11.13	1.008	18.61	18.46	0.468	0.53	1.13	1.1427	44.6423	2	2	2	0	0	0	0	0	0	0	0	0	0	0	0	0	0	0	0	0	0	0	0	0	0	0	0	0	0	0	0
1844	117432	0.982	32.85	33.45	0.829	3.98	4.81	0.712	7.97	11.19	1.197	20.9	17.45	0.791	0.92	1.16	1.1344	52.153	2	1	2	0	1	0	0	0	0	0	0	0	0	0	0	45	1	0	0	0	0	0	0	0	0	0	0	0	0	0	0
1845	117435	0.844	22.69	26.88	0.679	3.07	4.52	0.629	5.74	9.14	1.05	13.88	13.23	0.493	0.59	1.19	1.1364	51.8469	2	2	2	0	0	0	0	0	0	0	0	0	0	0	0	0	0	0	0	0	0	0	0	0	0	0	0	0	0	0	0
1846	117436	0.802	30.14	37.57	0.656	3.64	5.55	0.524	6.31	12.05	1.011	20.19	19.97	0.443	0.53	1.19	1.1401	51.625	2	2	2	0	0	0	0	0	0	0	0	0	0	0	0	0	0	0	0	0	0	0	0	0	0	0	0	0	0	0	0
1847	117437	0.967	39.84	41.19	0.766	4.15	5.42	0.716	9.16	12.8	1.155	26.53	22.97	0.62	0.7	1.12	1.1332	51.2021	2	2	2	0	0	0	0	0	0	0	0	0	0	0	0	0	0	0	0	0	0	0	0	0	0	0	0	0	0	0	0
1848	117440	1.057	45.17	42.73	0.873	5.28	6.05	0.874	17.88	20.47	1.357	22	16.2	0.647	0.75	1.15	1.143	49.317	2	1	2	0	1	0	0	0	0	0	0	0	0	0	0	46	1	0	0	0	0	0	0	0	0	0	0	0	0	0	0
1849	117441	0.861	44.7	51.95	0.917	5.99	6.54	0.618	10.97	17.76	1.003	27.74	27.65	0.596	0.62	1.04	1.1388	51.6211	2	2	2	0	0	0	0	0	0	0	0	0	0	0	0	0	0	0	0	0	0	0	0	0	0	0	0	0	0	0	0
1850	117442	1.086	43.85	40.37	0.911	4.94	5.43	0.817	11.73	14.36	1.32	27.17	20.58	0.547	0.61	1.11	1.1375	51.3906	2	2	2	0	0	0	0	0	0	0	0	0	0	0	0	0	0	0	0	0	0	0	0	0	0	0	0	0	0	0	0
1851	117445	0.857	38.27	44.64	0.78	4.56	5.84	0.712	9.1	12.79	0.946	24.6	26.01	0.434	0.5	1.15	1.1503	45.6294	2	2	2	0	0	0	0	0	0	0	0	0	0	0	0	0	0	0	0	0	0	0	0	0	0	0	0	0	0	0	0
1852	117450	0.832	33.85	40.67	0.602	3.49	5.79	0.583	8.03	13.76	1.058	22.34	21.13	0.398	0.48	1.2	1.1557	47.6353	2	1	2	0	4	0	0	0	0	0	0	0	0	0	0	10	1	0	11	1	0	12	1	0	16	1	0	0	0	0	0
1853	117454	1.145	50.16	43.8	0.86	4.94	5.75	0.81	11.74	14.49	1.421	33.48	23.56	0.589	0.68	1.16	1.1566	45.3473	2	2	2	0	0	0	0	0	0	0	0	0	0	0	0	0	0	0	0	0	0	0	0	0	0	0	0	0	0	0	0
1854	117460	1.158	49.11	42.4	0.947	5.52	5.82	0.903	11.28	12.5	1.342	32.31	24.08	0.607	0.71	1.17	1.1442	39.7426	2	2	2	0	0	0	0	0	0	0	0	0	0	0	0	0	0	0	0	0	0	0	0	0	0	0	0	0	0	0	0
1855	117467	1.081	46.09	42.64	0.94	5.51	5.86	0.815	10.63	13.05	1.262	29.96	23.73	0.661	0.76	1.16	1.1321	48.6852	2	1	2	0	2	0	0	0	0	0	0	0	0	0	0	14	1	0	17	1	0	0	0	0	0	0	0	0	0	0	0
1856	117475	1.048	40.96	39.09	0.749	3.24	4.33	0.741	7.47	10.09	1.226	30.25	24.68	0.628	0.82	1.3	1.1287	46.8624	2	2	2	0	0	0	0	0	0	0	0	0	0	0	0	0	0	0	0	0	0	0	0	0	0	0	0	0	0	0	0
1857	117494	0.949	27.78	29.29	0.798	3.5	4.39	0.67	6.75	10.09	1.183	17.53	14.81	0.66	0.77	1.16	1.1403	52.9152	2	2	2	0	0	0	0	0	0	0	0	0	0	0	0	0	0	0	0	0	0	0	0	0	0	0	0	0	0	0	0
1858	117497	0.916	35.58	38.84	0.742	4.11	5.54	0.671	7.86	11.71	1.094	23.61	21.59	0.464	0.52	1.12	1.136	48.354	2	1	2	0	1	0	0	0	0	0	0	0	0	0	0	18	1	0	0	0	0	0	0	0	0	0	0	0	0	0	0
1859	117498	0.766	24.66	32.18	0.582	2.97	5.11	0.586	6.45	11.01	0.949	15.24	16.06	0.317	0.34	1.09	1.155	46.0972	2	2	2	0	0	0	0	0	0	0	0	0	0	0	0	0	0	0	0	0	0	0	0	0	0	0	0	0	0	0	0
1860	117507	0.876	39.45	45.06	0.771	4.85	6.29	0.646	9.54	14.76	1.044	25.06	24.01	0.56	0.65	1.16	1.1415	44.1151	2	2	2	0	0	0	0	0	0	0	0	0	0	0	0	0	0	0	0	0	0	0	0	0	0	0	0	0	0	0	0
1861	117510	0.906	24.46	27	0.837	3.69	4.41	0.706	6.18	8.76	1.054	14.58	13.83	0.743	0.84	1.14	1.1579	49.6053	2	2	2	0	0	0	0	0	0	0	0	0	0	0	0	0	0	0	0	0	0	0	0	0	0	0	0	0	0	0	0
1862	117511	0.729	25.12	34.45	0.578	3.05	5.27	0.563	6.34	11.26	0.878	15.74	17.92	0.486	0.63	1.3	1.1394	50.3787	2	2	1	0	0	1	0	0	0	0	0	0	0	0	0	0	0	0	0	0	0	0	0	0	0	0	0	0	0	0	0
1863	117514	0.849	27.38	32.24	0.759	3.78	4.98	0.681	6.52	9.57	0.966	17.08	17.69	0.526	0.61	1.15	1.1523	45.447	2	2	2	0	0	0	0	0	0	0	0	0	0	0	0	0	0	0	0	0	0	0	0	0	0	0	0	0	0	0	0
1864	117518	0.933	33.92	36.36	0.742	3.8	5.12	0.701	8.19	11.7	1.122	21.93	19.55	0.587	0.69	1.18	1.1325	51.7956	2	2	2	0	0	0	0	0	0	0	0	0	0	0	0	0	0	0	0	0	0	0	0	0	0	0	0	0	0	0	0
1865	117537	0.998	37.69	37.78	0.733	3.68	5.02	0.768	8.57	11.16	1.179	25.44	21.59	0.482	0.57	1.17	1.1404	43.5246	2	2	2	0	0	0	0	0	0	0	0	0	0	0	0	0	0	0	0	0	0	0	0	0	0	0	0	0	0	0	0
1866	117540	0.917	43.54	47.48	0.804	4.36	5.43	0.661	10.75	16.25	1.102	28.43	25.8	0.457	0.53	1.17	1.1314	46.8312	2	2	2	0	0	0	0	0	0	0	0	0	0	0	0	0	0	0	0	0	0	0	0	0	0	0	0	0	0	0	0
1867	117546	1.13	45.21	39.99	0.884	4.45	5.04	0.924	11.25	12.17	1.295	29.5	22.79	0.736	0.85	1.16	1.1325	47.9177	2	2	2	0	0	0	0	0	0	0	0	0	0	0	0	0	0	0	0	0	0	0	0	0	0	0	0	0	0	0	0
1868	117551	1.037	40.28	38.86	0.803	4.46	5.55	0.773	8.02	10.36	1.212	27.81	22.94	0.534	0.62	1.16	1.1349	46.6132	2	2	2	0	0	0	0	0	0	0	0	0	0	0	0	0	0	0	0	0	0	0	0	0	0	0	0	0	0	0	0
1869	117554	0.762	23.55	30.92	0.592	2.86	4.83	0.645	6.74	10.45	0.892	13.95	15.64	0.431	0.56	1.31	1.135	52.9158	2	2	2	0	0	0	0	0	0	0	0	0	0	0	0	0	0	0	0	0	0	0	0	0	0	0	0	0	0	0	0
1870	117558	0.747	25.07	33.54	0.664	3.25	4.89	0.534	5.88	11.01	0.904	15.94	17.63	0.356	0.41	1.16	1.1349	51.4722	2	2	2	0	0	0	0	0	0	0	0	0	0	0	0	0	0	0	0	0	0	0	0	0	0	0	0	0	0	0	0
1871	117575	1.172	39.93	34.06	0.985	4.8	4.87	0.93	9.74	10.48	1.357	25.39	18.72	0.883	1.15	1.3	1.1311	48.1895	2	2	2	0	0	0	0	0	0	0	0	0	0	0	0	0	0	0	0	0	0	0	0	0	0	0	0	0	0	0	0
1872	117580	0.891	38.52	43.24	0.789	4.91	6.22	0.666	8.11	12.17	1.027	25.5	24.84	0.45	0.52	1.16	1.1329	48.258	2	2	2	0	0	0	0	0	0	0	0	0	0	0	0	0	0	0	0	0	0	0	0	0	0	0	0	0	0	0	0
1873	117589	0.864	30.54	35.37	0.699	3.35	4.79	0.659	7.54	11.44	1.027	19.66	19.14	0.635	0.82	1.3	1.1362	50.2412	2	2	2	0	0	0	0	0	0	0	0	0	0	0	0	0	0	0	0	0	0	0	0	0	0	0	0	0	0	0	0
1874	117604	0.846	37.73	44.6	0.57	3.55	6.23	0.737	9.99	13.55	0.975	24.19	24.81	0.286	0.33	1.16	1.1351	45.9386	2	2	2	0	0	0	0	0	0	0	0	0	0	0	0	0	0	0	0	0	0	0	0	0	0	0	0	0	0	0	0
1875	117616	0.703	19.01	27.03	0.58	2.79	4.81	0.605	4.87	8.05	0.801	11.35	14.17	0.276	0.31	1.14	1.1407	48.775	2	2	2	0	0	0	0	0	0	0	0	0	0	0	0	0	0	0	0	0	0	0	0	0	0	0	0	0	0	0	0
1876	117622	0.736	23.5	31.95	0.648	2.98	4.6	0.564	5.32	9.45	0.849	15.2	17.9	0.478	0.57	1.19	1.1408	52.8649	2	2	2	0	0	0	0	0	0	0	0	0	0	0	0	0	0	0	0	0	0	0	0	0	0	0	0	0	0	0	0
1877	117623	1.136	48.42	42.62	1.017	5.17	5.08	0.756	9.56	12.64	1.353	33.69	24.9	0.696	0.82	1.18	1.14	52.1919	2	2	2	0	0	0	0	0	0	0	0	0	0	0	0	0	0	0	0	0	0	0	0	0	0	0	0	0	0	0	0
1878	117631	0.841	28.33	33.68	0.735	3.55	4.83	0.577	6.29	10.91	1.031	18.49	17.94	0.519	0.54	1.04	1.1349	49.1473	2	2	2	0	0	0	0	0	0	0	0	0	0	0	0	0	0	0	0	0	0	0	0	0	0	0	0	0	0	0	0
1879	117635	0.56	18.82	33.62	0.57	2.63	4.61	0.368	3.71	10.06	0.659	12.49	18.95	0.455	0.59	1.3	1.1456	49.8553	2	2	2	0	0	0	0	0	0	0	0	0	0	0	0	0	0	0	0	0	0	0	0	0	0	0	0	0	0	0	0
1880	117639	0.76	22.82	30.04	0.654	3.02	4.61	0.589	5.54	9.4	0.89	14.26	16.03	0.301	0.35	1.16	1.1589	45.3556	2	2	2	0	0	0	0	0	0	0	0	0	0	0	0	0	0	0	0	0	0	0	0	0	0	0	0	0	0	0	0
1881	117643	0.964	30.67	31.81	0.821	4.2	5.12	0.766	8.92	11.64	1.166	17.55	15.06	0.607	0.63	1.04	1.1642	46.8451	2	2	2	0	0	0	0	0	0	0	0	0	0	0	0	0	0	0	0	0	0	0	0	0	0	0	0	0	0	0	0
1882	117645	1.276	41.93	32.86	1.18	5.54	4.69	0.924	10.77	11.66	1.552	25.62	16.51	1.132	1.18	1.04	1.1312	48.0652	2	2	2	0	0	0	0	0	0	0	0	0	0	0	0	0	0	0	0	0	0	0	0	0	0	0	0	0	0	0	0
1883	117652	0.825	35.39	42.87	0.722	3.8	5.26	0.619	8.53	13.78	0.968	23.05	23.82	0.461	0.53	1.14	1.1336	53.1953	2	2	2	0	0	0	0	0	0	0	0	0	0	0	0	0	0	0	0	0	0	0	0	0	0	0	0	0	0	0	0
1884	117653	0.931	35.25	37.88	0.811	3.88	4.78	0.697	8.66	12.43	1.099	22.71	20.66	0.51	0.59	1.17	1.1518	44.6301	2	2	2	0	0	0	0	0	0	0	0	0	0	0	0	0	0	0	0	0	0	0	0	0	0	0	0	0	0	0	0
1885	117654	0.944	39.36	41.68	0.712	4.39	6.17	0.668	9.67	14.47	1.203	25.3	21.04	0.429	0.5	1.17	1.1452	43.4206	2	2	2	0	0	0	0	0	0	0	0	0	0	0	0	0	0	0	0	0	0	0	0	0	0	0	0	0	0	0	0
1886	117657	0.807	28.05	34.78	0.629	3.23	5.14	0.607	5.66	9.33	0.944	19.16	20.31	0.52	0.67	1.3	1.1367	49.2083	2	2	2	0	0	0	0	0	0	0	0	0	0	0	0	0	0	0	0	0	0	0	0	0	0	0	0	0	0	0	0
1887	117665	0.775	22.1	28.53	0.635	3.1	4.88	0.634	5.73	9.04	0.908	13.27	14.61	0.554	0.72	1.31	1.1483	45.1175	2	1	2	0	2	0	0	0	0	0	0	0	0	0	0	53	2	1	57	2	2	0	0	0	0	0	0	0	0	0	0
1888	117666	0.921	34.35	37.31	0.829	4.34	5.24	0.649	7.36	11.34	1.092	22.64	20.74	0.546	0.63	1.16	1.135	46.9848	2	1	2	0	1	0	0	0	0	0	0	0	0	0	0	62	2	1	0	0	0	0	0	0	0	0	0	0	0	0	0
1889	117672	0.85	25.56	30.07	0.774	3.59	4.63	0.554	5.46	9.85	1.059	16.51	15.59	0.449	0.49	1.09	1.13	45.9572	2	2	2	0	0	0	0	0	0	0	0	0	0	0	0	0	0	0	0	0	0	0	0	0	0	0	0	0	0	0	0
1890	117678	1.02	37.84	37.08	0.782	4.15	5.31	0.792	9.52	12.02	1.224	24.18	19.76	0.479	0.55	1.16	1.154	46.5153	2	2	2	0	0	0	0	0	0	0	0	0	0	0	0	0	0	0	0	0	0	0	0	0	0	0	0	0	0	0	0
1891	117681	0.751	25.44	33.87	0.593	3.17	5.34	0.617	5.2	8.43	0.849	17.07	20.1	0.439	0.5	1.14	1.1398	50.5312	2	2	2	0	0	0	0	0	0	0	0	0	0	0	0	0	0	0	0	0	0	0	0	0	0	0	0	0	0	0	0
1892	117682	0.783	24.72	31.58	0.611	2.95	4.82	0.571	6.51	11.41	0.994	15.26	15.35	0.443	0.49	1.12	1.1385	48.748	2	1	2	0	1	0	0	0	0	0	0	0	0	0	0	58	2	3	0	0	0	0	0	0	0	0	0	0	0	0	0
1893	117692	1.062	55.8	52.53	0.853	5.14	6.03	0.824	13.36	16.22	1.231	37.3	30.29	0.52	0.6	1.15	1.145	42.8912	2	1	2	0	1	0	0	0	0	0	0	0	0	0	0	44	1	0	0	0	0	0	0	0	0	0	0	0	0	0	0
1894	117695	1.092	36.98	33.87	0.979	5	5.11	0.875	10.23	11.69	1.274	21.76	17.08	0.754	0.91	1.21	1.1545	46.5143	2	2	2	0	0	0	0	0	0	0	0	0	0	0	0	0	0	0	0	0	0	0	0	0	0	0	0	0	0	0	0
1895	117703	0.996	55.18	55.39	0.693	5.01	7.23	0.722	13.62	18.87	1.248	36.56	29.29	0.438	0.51	1.16	1.1323	46.8682	2	2	2	0	0	0	0	0	0	0	0	0	0	0	0	0	0	0	0	0	0	0	0	0	0	0	0	0	0	0	0
1896	117704	0.856	30.73	35.91	0.763	4	5.25	0.654	7.34	11.23	0.998	19.39	19.44	0.592	0.77	1.3	1.1318	45.8969	2	2	2	0	0	0	0	0	0	0	0	0	0	0	0	0	0	0	0	0	0	0	0	0	0	0	0	0	0	0	0
1897	117711	0.751	20.96	27.93	0.627	3.01	4.8	0.639	6.64	10.39	0.888	11.3	12.73	0.477	0.56	1.17	1.1566	46.35	2	2	2	0	0	0	0	0	0	0	0	0	0	0	0	0	0	0	0	0	0	0	0	0	0	0	0	0	0	0	0
1898	117714	0.887	28.52	32.17	0.761	3.83	5.03	0.669	7.02	10.49	1.062	17.68	16.65	0.583	0.65	1.11	1.1423	51.2455	2	2	2	0	0	0	0	0	0	0	0	0	0	0	0	0	0	0	0	0	0	0	0	0	0	0	0	0	0	0	0
1899	117727	0.768	23.7	30.85	0.623	3.01	4.83	0.617	5.75	9.32	0.895	14.94	16.71	0.424	0.48	1.14	1.1408	52.7173	2	2	2	0	0	0	0	0	0	0	0	0	0	0	0	0	0	0	0	0	0	0	0	0	0	0	0	0	0	0	0
1900	117728	1.088	42.29	38.87	0.832	4.68	5.63	0.807	8.7	10.78	1.287	28.91	22.46	0.572	0.64	1.12	1.1495	43.9279	2	1	2	0	1	0	0	0	0	0	0	0	0	0	0	14	1	0	0	0	0	0	0	0	0	0	0	0	0	0	0
1901	117729	0.765	20.62	26.95	0.632	2.7	4.27	0.591	4.93	8.34	0.906	12.99	14.35	0.447	0.5	1.12	1.1393	53.6613	2	2	2	0	0	0	0	0	0	0	0	0	0	0	0	0	0	0	0	0	0	0	0	0	0	0	0	0	0	0	0
1902	117732	0.883	26.24	29.71	0.706	3.57	5.06	0.668	6.62	9.91	1.089	16.05	14.74	0.646	0.84	1.3	1.1349	47.9271	2	2	2	0	0	0	0	0	0	0	0	0	0	0	0	0	0	0	0	0	0	0	0	0	0	0	0	0	0	0	0
1903	117734	0.977	41.48	42.43	0.824	4.89	5.94	0.78	13.64	17.49	1.207	22.94	19	0.524	0.58	1.12	1.1491	44.739	2	2	2	0	0	0	0	0	0	0	0	0	0	0	0	0	0	0	0	0	0	0	0	0	0	0	0	0	0	0	0
1904	117739	1.038	44.08	42.46	0.889	4.08	4.59	0.651	8.91	13.69	1.285	31.08	24.18	0.647	0.71	1.1	1.1485	52.8733	2	2	2	0	0	0	0	0	0	0	0	0	0	0	0	0	0	0	0	0	0	0	0	0	0	0	0	0	0	0	0
1905	117746	1.074	40.77	37.97	0.967	5.22	5.4	0.801	10.42	13.01	1.285	25.13	19.56	0.723	0.81	1.12	1.1341	50.462	2	2	2	0	0	0	0	0	0	0	0	0	0	0	0	0	0	0	0	0	0	0	0	0	0	0	0	0	0	0	0
1906	117747	0.943	41.06	43.53	0.706	3.63	5.14	0.647	8.6	13.28	1.148	28.83	25.11	0.459	0.53	1.16	1.1391	49.7205	2	2	2	0	0	0	0	0	0	0	0	0	0	0	0	0	0	0	0	0	0	0	0	0	0	0	0	0	0	0	0
1907	117748	1.209	55.14	45.59	1.01	5.99	5.93	0.831	10.75	12.94	1.437	38.4	26.73	0.871	1.13	1.3	1.1314	45.071	2	2	2	0	0	0	0	0	0	0	0	0	0	0	0	0	0	0	0	0	0	0	0	0	0	0	0	0	0	0	0
1908	117753	0.675	21.36	31.67	0.541	2.53	4.67	0.556	5.97	10.75	0.791	12.86	16.25	0.331	0.37	1.13	1.1505	46.8562	1	1	2	1	1	0	48	1	0	0	0	0	0	0	0	48	1	0	0	0	0	0	0	0	0	0	0	0	0	0	0
1909	117755	1.172	54.25	46.28	1.088	6.01	5.52	0.846	13.16	15.56	1.392	35.08	25.19	0.761	0.89	1.16	1.1314	49.7011	2	2	2	0	0	0	0	0	0	0	0	0	0	0	0	0	0	0	0	0	0	0	0	0	0	0	0	0	0	0	0
1910	117767	0.966	45.03	46.6	0.688	3.92	5.7	0.714	13.36	18.72	1.251	27.75	22.18	0.512	0.59	1.16	1.1366	46.8478	2	2	2	0	0	0	0	0	0	0	0	0	0	0	0	0	0	0	0	0	0	0	0	0	0	0	0	0	0	0	0
1911	117771	0.776	30.66	39.53	0.582	3.53	6.06	0.674	8.33	12.35	0.89	18.8	21.13	0.41	0.48	1.17	1.1504	46.2529	2	2	2	0	0	0	0	0	0	0	0	0	0	0	0	0	0	0	0	0	0	0	0	0	0	0	0	0	0	0	0
1912	117780	0.989	42.84	43.33	0.799	4.52	5.66	0.736	9.68	13.16	1.168	28.64	24.51	0.554	0.63	1.14	1.1357	48.9173	2	2	2	0	0	0	0	0	0	0	0	0	0	0	0	0	0	0	0	0	0	0	0	0	0	0	0	0	0	0	0
1913	117784	0.865	39.38	45.52	0.581	3.28	5.65	0.661	7.61	11.52	1.005	28.5	28.35	0.298	0.33	1.12	1.1528	47.6814	2	2	2	0	0	0	0	0	0	0	0	0	0	0	0	0	0	0	0	0	0	0	0	0	0	0	0	0	0	0	0
1914	117792	0.759	20.14	26.52	0.667	2.8	4.2	0.632	5.26	8.33	0.863	12.08	13.99	0.391	0.44	1.13	1.1497	46.0581	2	2	2	0	0	0	0	0	0	0	0	0	0	0	0	0	0	0	0	0	0	0	0	0	0	0	0	0	0	0	0
1915	117793	0.805	27.45	34.1	0.648	3	4.63	0.559	5.61	10.02	0.969	18.84	19.45	0.478	0.55	1.16	1.1607	47.6582	2	2	2	0	0	0	0	0	0	0	0	0	0	0	0	0	0	0	0	0	0	0	0	0	0	0	0	0	0	0	0
1916	117794	0.808	24	29.71	0.708	2.72	3.85	0.605	5.65	9.34	0.945	15.62	16.52	0.625	0.81	1.3	1.1382	47.3212	2	2	2	0	0	0	0	0	0	0	0	0	0	0	0	0	0	0	0	0	0	0	0	0	0	0	0	0	0	0	0
1917	117800	0.68	20.37	29.98	0.558	2.88	5.17	0.499	5.15	10.32	0.851	12.34	14.49	0.332	0.37	1.12	1.1441	46.4201	2	2	2	0	0	0	0	0	0	0	0	0	0	0	0	0	0	0	0	0	0	0	0	0	0	0	0	0	0	0	0
1918	117807	0.834	25.35	30.42	0.701	3.25	4.64	0.66	6.19	9.37	0.97	15.92	16.41	0.414	0.48	1.16	1.1285	51.7546	2	2	2	0	0	0	0	0	0	0	0	0	0	0	0	0	0	0	0	0	0	0	0	0	0	0	0	0	0	0	0
1919	117816	0.819	35.68	43.56	0.65	3.68	5.66	0.602	8.18	13.59	0.98	23.83	24.31	0.461	0.48	1.05	1.1465	44.7506	2	1	2	0	1	0	0	0	0	0	0	0	0	0	0	64	2	3	0	0	0	0	0	0	0	0	0	0	0	0	0
1920	117817	0.979	28.86	29.47	0.926	4.35	4.69	0.68	6.76	9.96	1.197	17.75	14.82	0.788	1.03	1.31	1.1392	49.8836	2	2	2	0	0	0	0	0	0	0	0	0	0	0	0	0	0	0	0	0	0	0	0	0	0	0	0	0	0	0	0
1921	117818	0.758	32.99	43.52	0.567	3.49	6.16	0.569	7.98	14.04	0.923	21.51	23.32	0.372	0.43	1.15	1.1504	46.2834	2	1	1	0	1	1	0	0	0	0	0	0	0	0	0	16	1	0	0	0	0	0	0	0	0	0	0	0	0	0	0
1922	117822	0.956	45.8	47.92	0.762	4.06	5.33	0.682	11.46	16.82	1.175	30.27	25.77	0.556	0.66	1.18	1.1421	42.3318	2	2	1	0	0	2	0	0	0	0	0	0	0	0	0	0	0	0	0	0	0	0	0	0	0	0	0	0	0	0	0
1923	117826	0.97	28.48	29.35	0.838	3.83	4.57	0.72	6.44	8.95	1.15	18.21	15.83	0.638	0.72	1.14	1.1306	46.9414	2	2	2	0	0	0	0	0	0	0	0	0	0	0	0	0	0	0	0	0	0	0	0	0	0	0	0	0	0	0	0
1924	117827	0.844	22.89	27.1	0.686	3.22	4.69	0.589	4.63	7.86	1.033	15.04	14.55	0.702	0.92	1.32	1.1517	46.9762	2	2	2	0	0	0	0	0	0	0	0	0	0	0	0	0	0	0	0	0	0	0	0	0	0	0	0	0	0	0	0
1925	117835	1.073	44.3	41.26	0.886	4.93	5.56	0.843	12.58	14.93	1.289	26.78	20.77	0.691	0.8	1.15	1.137	50.3779	2	2	2	0	0	0	0	0	0	0	0	0	0	0	0	0	0	0	0	0	0	0	0	0	0	0	0	0	0	0	0
1926	117845	1.122	54.3	48.42	0.913	5.77	6.32	0.916	12.01	13.11	1.26	36.53	28.98	0.562	0.65	1.16	1.1371	49.0018	2	2	2	0	0	0	0	0	0	0	0	0	0	0	0	0	0	0	0	0	0	0	0	0	0	0	0	0	0	0	0
1927	117849	0.963	31.18	32.38	0.883	4.43	5.01	0.706	7.32	10.36	1.143	19.44	17.01	0.724	0.75	1.04	1.1381	50.9603	2	2	2	0	0	0	0	0	0	0	0	0	0	0	0	0	0	0	0	0	0	0	0	0	0	0	0	0	0	0	0
1928	117856	0.781	20.91	26.78	0.809	3.36	4.16	0.524	4.58	8.74	0.934	12.97	13.89	0.764	0.99	1.3	1.1514	55.2401	2	2	2	0	0	0	0	0	0	0	0	0	0	0	0	0	0	0	0	0	0	0	0	0	0	0	0	0	0	0	0
1929	117858	1.021	37.8	37.01	0.904	4.69	5.19	0.738	9.01	12.21	1.229	24.1	19.61	0.721	0.81	1.12	1.1354	49.3794	2	2	2	0	0	0	0	0	0	0	0	0	0	0	0	0	0	0	0	0	0	0	0	0	0	0	0	0	0	0	0
1930	117862	1.312	60.93	46.43	0.981	6.27	6.39	1.048	14.76	14.08	1.537	39.89	25.95	0.84	0.98	1.16	1.1393	49.141	2	2	2	0	0	0	0	0	0	0	0	0	0	0	0	0	0	0	0	0	0	0	0	0	0	0	0	0	0	0	0
1931	117864	0.866	34.58	39.95	0.739	3.92	5.31	0.684	7.09	10.37	0.971	23.56	24.28	0.665	0.88	1.32	1.1492	45.8052	2	2	2	0	0	0	0	0	0	0	0	0	0	0	0	0	0	0	0	0	0	0	0	0	0	0	0	0	0	0	0
1932	117865	0.815	35.4	43.42	0.854	4.42	5.17	0.563	7.43	13.18	0.94	23.56	25.07	0.543	0.63	1.17	1.1382	49.5695	1	2	2	1	0	0	15	1	0	0	0	0	0	0	0	0	0	0	0	0	0	0	0	0	0	0	0	0	0	0	0
1933	117866	0.785	28.62	36.48	0.579	3.08	5.32	0.56	6.51	11.62	0.974	19.04	19.54	0.324	0.37	1.13	1.1445	44.0252	2	2	2	0	0	0	0	0	0	0	0	0	0	0	0	0	0	0	0	0	0	0	0	0	0	0	0	0	0	0	0
1934	117869	0.95	48.99	51.58	0.882	5.51	6.24	0.618	9.98	16.14	1.148	33.51	29.19	0.673	0.87	1.3	1.1364	48.2209	2	2	2	0	0	0	0	0	0	0	0	0	0	0	0	0	0	0	0	0	0	0	0	0	0	0	0	0	0	0	0
1935	117879	0.937	43.7	46.63	0.768	4.79	6.24	0.739	11.06	14.96	1.095	27.85	25.43	0.524	0.59	1.12	1.1377	50.4636	2	2	2	0	0	0	0	0	0	0	0	0	0	0	0	0	0	0	0	0	0	0	0	0	0	0	0	0	0	0	0
1936	117882	1.206	48.88	40.53	0.898	5.76	6.41	1.003	13.74	13.7	1.438	29.38	20.43	0.678	0.77	1.13	1.1467	44.8829	2	2	2	0	0	0	0	0	0	0	0	0	0	0	0	0	0	0	0	0	0	0	0	0	0	0	0	0	0	0	0
1937	117884	0.786	24.58	31.29	0.645	3.12	4.84	0.6	5.68	9.47	0.93	15.78	16.98	0.532	0.69	1.3	1.1335	54.9586	2	2	2	0	0	0	0	0	0	0	0	0	0	0	0	0	0	0	0	0	0	0	0	0	0	0	0	0	0	0	0
1938	117893	0.954	30.24	31.71	0.769	3.81	4.96	0.743	6.36	8.56	1.103	20.07	18.19	0.775	1	1.3	1.1349	48.7708	2	2	2	0	0	0	0	0	0	0	0	0	0	0	0	0	0	0	0	0	0	0	0	0	0	0	0	0	0	0	0
1939	117900	1.24	48.03	39.09	1	5.14	5.15	0.89	10.4	11.69	1.459	32.48	22.26	0.902	1.17	1.3	1.1517	44.901	2	2	2	0	0	0	0	0	0	0	0	0	0	0	0	0	0	0	0	0	0	0	0	0	0	0	0	0	0	0	0
1940	117912	0.869	28.77	33.09	0.73	3.46	4.74	0.661	6.96	10.53	1.03	18.35	17.82	0.665	0.88	1.32	1.1496	45.239	2	2	2	0	0	0	0	0	0	0	0	0	0	0	0	0	0	0	0	0	0	0	0	0	0	0	0	0	0	0	0
1941	117913	0.906	27.11	29.94	0.741	3.6	4.86	0.754	7.25	9.61	1.051	16.26	15.47	0.498	0.56	1.11	1.1298	48.4164	2	2	2	0	0	0	0	0	0	0	0	0	0	0	0	0	0	0	0	0	0	0	0	0	0	0	0	0	0	0	0
1942	117916	0.829	32.89	39.67	0.603	3.35	5.55	0.658	8.56	13.02	0.994	20.98	21.11	0.312	0.34	1.08	1.1432	51.7979	2	2	2	0	0	0	0	0	0	0	0	0	0	0	0	0	0	0	0	0	0	0	0	0	0	0	0	0	0	0	0
1943	117917	0.862	27.37	31.76	0.618	2.73	4.41	0.664	6.05	9.11	1.02	18.6	18.24	0.447	0.52	1.16	1.1553	46.4751	2	1	2	0	1	0	0	0	0	0	0	0	0	0	0	61	2	1	0	0	0	0	0	0	0	0	0	0	0	0	0
1944	117918	1.125	33.86	30.11	1.105	5.33	4.82	0.88	8.92	10.13	1.294	19.62	15.16	0.945	1.05	1.12	1.1535	45.1159	2	2	2	0	0	0	0	0	0	0	0	0	0	0	0	0	0	0	0	0	0	0	0	0	0	0	0	0	0	0	0
1945	117929	1.024	42.88	41.88	0.834	4.56	5.47	0.738	10.58	14.34	1.257	27.74	22.07	0.533	0.61	1.15	1.1598	46.1217	2	1	2	0	1	0	0	0	0	0	0	0	0	0	0	50	2	2	0	0	0	0	0	0	0	0	0	0	0	0	0
1946	117934	0.698	25.08	35.93	0.571	2.84	4.98	0.615	6.27	10.2	0.77	15.97	20.75	0.442	0.57	1.3	1.145	55.5901	2	2	2	0	0	0	0	0	0	0	0	0	0	0	0	0	0	0	0	0	0	0	0	0	0	0	0	0	0	0	0
1947	117950	0.614	19.03	30.98	0.54	2.33	4.32	0.514	6.44	12.51	0.725	10.26	14.15	0.414	0.55	1.32	1.1478	47.189	2	2	2	0	0	0	0	0	0	0	0	0	0	0	0	0	0	0	0	0	0	0	0	0	0	0	0	0	0	0	0
1948	117951	0.855	36.14	42.29	0.628	3.41	5.43	0.72	9.59	13.32	0.983	23.14	23.54	0.293	0.31	1.05	1.1505	45.398	2	2	2	0	0	0	0	0	0	0	0	0	0	0	0	0	0	0	0	0	0	0	0	0	0	0	0	0	0	0	0
1949	117957	0.948	34.38	36.25	0.757	3.97	5.25	0.671	7.73	11.53	1.164	22.68	19.48	0.744	0.96	1.3	1.1499	42.2782	2	2	2	0	0	0	0	0	0	0	0	0	0	0	0	0	0	0	0	0	0	0	0	0	0	0	0	0	0	0	0
1950	117962	0.71	34.65	48.78	0.491	3.02	6.15	0.51	8.58	16.83	0.894	23.06	25.8	0.235	0.27	1.15	1.1517	45.4952	2	2	2	0	0	0	0	0	0	0	0	0	0	0	0	0	0	0	0	0	0	0	0	0	0	0	0	0	0	0	0
1951	117964	1.126	43.9	39	0.962	4.99	5.18	0.897	12.42	13.83	1.326	26.5	19.98	0.636	0.71	1.12	1.1388	50.6369	2	2	2	0	0	0	0	0	0	0	0	0	0	0	0	0	0	0	0	0	0	0	0	0	0	0	0	0	0	0	0
1952	117997	0.76	28.29	37.25	0.607	3.3	5.44	0.507	5.55	10.95	0.932	19.43	20.85	0.409	0.46	1.13	1.1515	46.6206	2	2	2	0	0	0	0	0	0	0	0	0	0	0	0	0	0	0	0	0	0	0	0	0	0	0	0	0	0	0	0
1953	117999	0.969	30.83	31.82	0.81	3.88	4.79	0.718	7.11	9.91	1.159	19.84	17.12	0.732	0.76	1.04	1.1558	46.7371	2	2	2	0	0	0	0	0	0	0	0	0	0	0	0	0	0	0	0	0	0	0	0	0	0	0	0	0	0	0	0
1954	118001	0.63	26.62	42.28	0.531	3.11	5.87	0.493	7.04	14.26	0.744	16.47	22.15	0.339	0.4	1.17	1.1397	51.9862	2	2	2	0	0	0	0	0	0	0	0	0	0	0	0	0	0	0	0	0	0	0	0	0	0	0	0	0	0	0	0
1955	118003	0.897	35.72	39.84	0.716	3.96	5.52	0.741	9.29	12.54	1.032	22.47	21.77	0.497	0.58	1.16	1.1377	52.5264	2	2	2	0	0	0	0	0	0	0	0	0	0	0	0	0	0	0	0	0	0	0	0	0	0	0	0	0	0	0	0
1956	118004	0.984	43.45	44.17	0.873	4.8	5.5	0.68	10.24	15.07	1.204	28.41	23.6	0.547	0.61	1.12	1.1353	50.7233	2	2	2	0	0	0	0	0	0	0	0	0	0	0	0	0	0	0	0	0	0	0	0	0	0	0	0	0	0	0	0
1957	118013	0.99	48.75	49.23	0.733	4.38	5.98	0.727	10.54	14.49	1.176	33.82	28.76	0.462	0.54	1.17	1.1313	48.2218	2	2	2	0	0	0	0	0	0	0	0	0	0	0	0	0	0	0	0	0	0	0	0	0	0	0	0	0	0	0	0
1958	118014	1.182	47.24	39.95	0.968	5.23	5.4	0.954	11.24	11.79	1.352	30.77	22.76	0.844	1.09	1.3	1.1518	46.6422	2	2	2	0	0	0	0	0	0	0	0	0	0	0	0	0	0	0	0	0	0	0	0	0	0	0	0	0	0	0	0
1959	118022	0.882	31.89	36.17	0.672	3.51	5.22	0.686	7.8	11.37	1.051	20.58	19.57	0.551	0.72	1.3	1.1434	51.8836	2	2	2	0	0	0	0	0	0	0	0	0	0	0	0	0	0	0	0	0	0	0	0	0	0	0	0	0	0	0	0
1960	118026	0.619	17.35	28.04	0.561	2.33	4.15	0.489	3.88	7.95	0.699	11.14	15.95	0.302	0.34	1.12	1.1535	47.2762	2	2	2	0	0	0	0	0	0	0	0	0	0	0	0	0	0	0	0	0	0	0	0	0	0	0	0	0	0	0	0
1961	118030	0.773	27.97	36.18	0.756	3.81	5.05	0.595	6.47	10.87	0.872	17.68	20.27	0.471	0.51	1.08	1.1393	47.5569	2	2	2	0	0	0	0	0	0	0	0	0	0	0	0	0	0	0	0	0	0	0	0	0	0	0	0	0	0	0	0
1962	118031	0.655	24.75	37.81	0.61	2.99	4.9	0.491	5.96	12.14	0.761	15.8	20.76	0.551	0.73	1.32	1.155	48.5816	2	1	2	0	1	0	0	0	0	0	0	0	0	0	0	7	1	0	0	0	0	0	0	0	0	0	0	0	0	0	0
1963	118033	0.889	27.49	30.92	0.679	3.15	4.63	0.672	7.09	10.55	1.096	17.25	15.74	0.529	0.62	1.17	1.1594	46.7239	2	1	2	0	1	0	0	0	0	0	0	0	0	0	0	48	1	0	0	0	0	0	0	0	0	0	0	0	0	0	0
1964	118038	0.684	21.46	31.36	0.645	3.06	4.75	0.491	4.62	9.41	0.801	13.78	17.2	0.478	0.56	1.17	1.1459	52.5928	2	2	2	0	0	0	0	0	0	0	0	0	0	0	0	0	0	0	0	0	0	0	0	0	0	0	0	0	0	0	0
1965	118039	0.725	22.87	31.54	0.662	2.94	4.45	0.55	5.69	10.35	0.851	14.24	16.74	0.434	0.47	1.09	1.1382	53.3039	2	2	2	0	0	0	0	0	0	0	0	0	0	0	0	0	0	0	0	0	0	0	0	0	0	0	0	0	0	0	0
1966	118042	1.083	35.67	32.94	1.04	5.4	5.2	0.838	8.45	10.09	1.236	21.81	17.65	0.779	0.9	1.15	1.1476	44.8603	2	2	2	0	0	0	0	0	0	0	0	0	0	0	0	0	0	0	0	0	0	0	0	0	0	0	0	0	0	0	0
1967	118045	0.953	37.5	39.33	0.741	4.02	5.42	0.69	8.16	11.83	1.147	25.33	22.08	0.499	0.56	1.12	1.1387	50.3202	2	2	2	0	0	0	0	0	0	0	0	0	0	0	0	0	0	0	0	0	0	0	0	0	0	0	0	0	0	0	0
1968	118047	0.743	30.75	41.41	0.669	3.54	5.29	0.527	7.16	13.59	0.89	20.05	22.52	0.467	0.61	1.32	1.1502	45.9625	2	2	2	0	0	0	0	0	0	0	0	0	0	0	0	0	0	0	0	0	0	0	0	0	0	0	0	0	0	0	0
1969	118051	1.036	33.07	31.92	0.97	3.63	3.75	0.9	10.48	11.65	1.147	18.96	16.52	0.739	0.87	1.17	1.1464	44.408	2	2	2	0	0	0	0	0	0	0	0	0	0	0	0	0	0	0	0	0	0	0	0	0	0	0	0	0	0	0	0
1970	118055	0.956	32.03	33.51	0.91	4.39	4.82	0.73	7.32	10.03	1.089	20.32	18.66	0.733	0.76	1.04	1.1312	43.7154	2	2	2	0	0	0	0	0	0	0	0	0	0	0	0	0	0	0	0	0	0	0	0	0	0	0	0	0	0	0	0
1971	118057	0.915	33.92	37.08	0.722	3.6	4.98	0.648	7.66	11.82	1.117	22.66	20.28	0.518	0.6	1.16	1.1585	48.2948	2	2	2	0	0	0	0	0	0	0	0	0	0	0	0	0	0	0	0	0	0	0	0	0	0	0	0	0	0	0	0
1972	118058	0.885	38.82	43.86	0.738	4.12	5.59	0.633	7.21	11.39	1.023	27.49	26.88	0.537	0.7	1.3	1.1305	49.9138	2	1	2	0	1	0	0	0	0	0	0	0	0	0	0	40	1	0	0	0	0	0	0	0	0	0	0	0	0	0	0
1973	118072	0.884	24.16	27.32	0.684	2.96	4.33	0.651	5.32	8.17	1.071	15.88	14.82	0.564	0.64	1.13	1.1504	46.1706	2	2	2	0	0	0	0	0	0	0	0	0	0	0	0	0	0	0	0	0	0	0	0	0	0	0	0	0	0	0	0
1974	118073	0.866	39.74	45.9	0.653	3.8	5.82	0.662	8.73	13.2	1.012	27.21	26.88	0.404	0.47	1.16	1.1571	46.0242	2	1	2	0	1	0	0	0	0	0	0	0	0	0	0	35	1	0	0	0	0	0	0	0	0	0	0	0	0	0	0
1975	118079	1.258	55.65	44.22	1.206	6.8	5.64	1.01	12.98	12.85	1.394	35.87	25.73	0.878	0.98	1.12	1.139	52.7461	2	2	2	0	0	0	0	0	0	0	0	0	0	0	0	0	0	0	0	0	0	0	0	0	0	0	0	0	0	0	0
1976	118082	1.024	43.72	42.69	0.793	4.5	5.68	0.838	12.56	14.99	1.211	26.66	22.02	0.578	0.67	1.16	1.1549	46.51	2	2	2	0	0	0	0	0	0	0	0	0	0	0	0	0	0	0	0	0	0	0	0	0	0	0	0	0	0	0	0
1977	118087	1.097	50.91	46.42	0.853	4.56	5.35	0.831	11.09	13.34	1.271	35.27	27.74	0.669	0.84	1.26	1.15	45.8131	2	2	2	0	0	0	0	0	0	0	0	0	0	0	0	0	0	0	0	0	0	0	0	0	0	0	0	0	0	0	0
1978	118091	0.797	36.05	45.22	0.588	3.59	6.11	0.668	8.85	13.24	0.913	23.61	25.87	0.296	0.32	1.08	1.1295	47.0682	2	2	2	0	0	0	0	0	0	0	0	0	0	0	0	0	0	0	0	0	0	0	0	0	0	0	0	0	0	0	0
1979	118103	1.053	48.37	45.93	0.814	4.89	6.01	0.811	10.89	13.43	1.23	32.59	26.49	0.536	0.61	1.14	1.1507	42.6714	2	2	1	0	0	1	0	0	0	0	0	0	0	0	0	0	0	0	0	0	0	0	0	0	0	0	0	0	0	0	0
1980	118104	0.691	22.19	32.12	0.608	3.02	4.96	0.544	4.94	9.08	0.787	14.23	18.08	0.491	0.65	1.32	1.1429	44.1107	2	2	2	0	0	0	0	0	0	0	0	0	0	0	0	0	0	0	0	0	0	0	0	0	0	0	0	0	0	0	0
1981	118105	0.823	25.88	31.46	0.689	2.98	4.33	0.59	5.78	9.79	0.987	17.12	17.34	0.494	0.53	1.08	1.1361	50.5367	2	2	2	0	0	0	0	0	0	0	0	0	0	0	0	0	0	0	0	0	0	0	0	0	0	0	0	0	0	0	0
1982	118108	1.01	40.83	40.44	0.812	4.59	5.65	0.768	10.6	13.81	1.222	25.64	20.98	0.54	0.59	1.09	1.1428	51.3259	2	2	2	0	0	0	0	0	0	0	0	0	0	0	0	0	0	0	0	0	0	0	0	0	0	0	0	0	0	0	0
1983	118111	0.875	25.94	29.66	0.706	3.33	4.72	0.674	6.46	9.6	1.053	16.14	15.34	0.463	0.54	1.16	1.1337	46.8972	2	2	2	0	0	0	0	0	0	0	0	0	0	0	0	0	0	0	0	0	0	0	0	0	0	0	0	0	0	0	0
1984	118113	0.933	28.27	30.3	0.815	3.95	4.85	0.61	5.83	9.56	1.164	18.49	15.89	0.528	0.61	1.16	1.1308	49.7507	2	2	2	0	0	0	0	0	0	0	0	0	0	0	0	0	0	0	0	0	0	0	0	0	0	0	0	0	0	0	0
1985	118115	1.058	49.2	46.48	0.765	4.34	5.68	0.885	14.58	16.48	1.245	30.28	24.32	0.604	0.63	1.04	1.1582	46.4335	2	1	2	0	1	0	0	0	0	0	0	0	0	0	0	43	1	0	0	0	0	0	0	0	0	0	0	0	0	0	0
1986	118120	0.633	22.4	35.41	0.527	2.55	4.84	0.447	5.59	12.52	0.79	14.26	18.04	0.287	0.31	1.1	1.1582	49.8353	2	2	2	0	0	0	0	0	0	0	0	0	0	0	0	0	0	0	0	0	0	0	0	0	0	0	0	0	0	0	0
1987	118121	0.942	30.05	31.91	0.711	3.22	4.53	0.643	6.94	10.79	1.199	19.89	16.58	0.516	0.57	1.11	1.1622	45.9556	2	2	2	0	0	0	0	0	0	0	0	0	0	0	0	0	0	0	0	0	0	0	0	0	0	0	0	0	0	0	0
1988	118123	1.101	40.78	37.03	0.921	4.54	4.93	0.88	9.45	10.74	1.255	26.79	21.35	0.914	1.19	1.3	1.1375	53.0584	2	2	2	0	0	0	0	0	0	0	0	0	0	0	0	0	0	0	0	0	0	0	0	0	0	0	0	0	0	0	0
1989	118124	1.102	32.74	29.72	0.877	4.19	4.77	0.839	8.06	9.6	1.336	20.5	15.35	0.826	1.07	1.3	1.1534	45.5515	2	2	2	0	0	0	0	0	0	0	0	0	0	0	0	0	0	0	0	0	0	0	0	0	0	0	0	0	0	0	0
1990	118128	1.151	37.54	32.61	0.741	3.22	4.34	0.962	9.41	9.78	1.347	24.92	18.49	0.577	0.68	1.18	1.1561	42.6297	2	1	2	0	2	0	0	0	0	0	0	0	0	0	0	50	2	1	54	2	1	0	0	0	0	0	0	0	0	0	0
1991	118134	0.992	54.33	54.77	0.719	5.17	7.18	0.789	16.01	20.3	1.215	33.15	27.28	0.47	0.56	1.19	1.1289	49.8589	2	2	2	0	0	0	0	0	0	0	0	0	0	0	0	0	0	0	0	0	0	0	0	0	0	0	0	0	0	0	0
1992	118140	0.98	28.95	29.54	0.801	3.84	4.8	0.754	6.31	8.37	1.148	18.8	16.37	0.541	0.61	1.12	1.1343	52.8144	2	2	2	0	0	0	0	0	0	0	0	0	0	0	0	0	0	0	0	0	0	0	0	0	0	0	0	0	0	0	0
1993	118142	0.777	31.71	40.83	0.675	3.76	5.58	0.567	6.75	11.91	0.908	21.19	23.34	0.378	0.42	1.12	1.1287	44.7618	2	2	2	0	0	0	0	0	0	0	0	0	0	0	0	0	0	0	0	0	0	0	0	0	0	0	0	0	0	0	0
1994	118146	0.902	40.51	44.91	0.639	3.66	5.73	0.708	9.3	13.15	1.058	27.55	26.04	0.681	0.88	1.3	1.1552	45.3721	2	2	2	0	0	0	0	0	0	0	0	0	0	0	0	0	0	0	0	0	0	0	0	0	0	0	0	0	0	0	0
1995	118149	1.276	64.59	50.6	1.255	7.91	6.3	1.034	14.92	14.43	1.398	41.75	29.87	0.861	1.01	1.17	1.134	49.51	2	2	2	0	0	0	0	0	0	0	0	0	0	0	0	0	0	0	0	0	0	0	0	0	0	0	0	0	0	0	0
1996	118150	0.714	22.63	31.7	0.594	2.66	4.47	0.515	5.55	10.77	0.877	14.42	16.45	0.375	0.41	1.11	1.1612	48.3762	2	2	2	0	0	0	0	0	0	0	0	0	0	0	0	0	0	0	0	0	0	0	0	0	0	0	0	0	0	0	0
1997	118161	1.033	37.76	36.54	0.867	4.46	5.15	0.821	10.09	12.29	1.215	23.21	19.11	0.806	1.05	1.3	1.1527	44.0319	2	2	2	0	0	0	0	0	0	0	0	0	0	0	0	0	0	0	0	0	0	0	0	0	0	0	0	0	0	0	0
1998	118162	0.89	35.77	40.19	0.666	3.92	5.89	0.692	8.6	12.44	1.063	23.25	21.87	0.4	0.46	1.14	1.1346	52.3084	2	1	2	0	2	0	0	0	0	0	0	0	0	0	0	30	1	0	50	2	1	0	0	0	0	0	0	0	0	0	0
[truncated: 1,553 more rows]
[truncated: 65 more columns]
